# Supplementary material for: Cell-type-specific response in host plants to the co-infection by sweet potato viruses
Source: Research Square preprint supplement (doi:10.21203/rs.3.rs-5025036/v1), 2024-09-20
Supplement: Supplementary file 1 [file Table_S1.xlsx]

## Sheet: Table_S1A
Table S1A Plant physiological index
Greenhouse									Field
Sample	Height(cm)	Root fresh weight(g)			Sample	Photosynthesis efficiency				Sample	Main vine length	Root fresh weight(g)			Sample	Photosynthesis efficiency		Sample	Soluable sugar(mg/g)	Starch (mg/g)
JHY	26.5	10.91			JHY	11.5				JHY	45	0.74			JHY	5.26328		JHY	130.128	279.613
JHY	33.5	9.75			JHY	11.6				JHY	83.2	0.76			JHY	5.23684		JHY	135.892	300.696
JHY	42.7	8.1			JHY	11.7				JHY	32.2	0.64			JHY	5.20751		JHY	132.575	276.007
JHY	30.3	11.2			JHY	11.7				JHY	68.4	0.98			JHY	5.28841		JHY	141.444	232.994
JHY	41.6	9.3			JHY	10.3				JHY	40.8	0.76			JHY	5.29378		JHY	140.751	312.566
JHY	36.1	7.9			JHY	10.3				JHY	54.7	0.98			JHY	5.0672		JHY	137.338	220.188
JHY	35.4	8.6			JHY	10.2				JHY	43.5	1.06			JHY	5.10388		JHY	144.604	311.434
JHY	29.8	10.8			JHY	10.4				JHY	52.6	0.54			JHY	5.13887		JHY	120.222	300.134
JHY	37.5	7.82			JHY	10				JHY	48.9	0.52			JHY	5.11815		JHY	128.443	304.334
VF-JHY	53.1	23.81			JHY	10				VF-JHY	154	2.22			JHY	5.10778		VF-JHY	184.519	415.116
VF-JHY	70.4	19.93			JHY	10.1				VF-JHY	172	2.22			JHY	5.69312		VF-JHY	191.098	352.37
VF-JHY	109.9	22.57			JHY	10.1				VF-JHY	130	1.98			JHY	5.65556		VF-JHY	196.962	347.47
VF-JHY	85.6	28.5			VF-JHY	11.3				VF-JHY	149	2.28			JHY	5.7139		VF-JHY	202.537	343.139
VF-JHY	90.6	18.5			VF-JHY	11.3				VF-JHY	115	1.86			JHY	5.74081		VF-JHY	198.517	363.222
VF-JHY	84.9	20.8			VF-JHY	11.5				VF-JHY	137	1.97			JHY	5.6937		VF-JHY	195.753	342.955
VF-JHY	79.2	24.9			VF-JHY	11.3				VF-JHY	161	2.04			VF-JHY	9.52796		VF-JHY	195.22	355.955
VF-JHY	94.2	18.1			VF-JHY	12				VF-JHY	126	2.15			VF-JHY	9.53178		VF-JHY	207.681	380.423
VF-JHY	69.6	26.4			VF-JHY	12.9				VF-JHY	113	2.22			VF-JHY	9.58485		VF-JHY	192.028	341.493
					VF-JHY	12.9									VF-JHY	9.5985
					VF-JHY	13.2									VF-JHY	9.57403
					VF-JHY	12.1									VF-JHY	9.41972
					VF-JHY	12.2									VF-JHY	9.40427
					VF-JHY	12.2									VF-JHY	9.40722
					VF-JHY	12.3									VF-JHY	9.45884
															VF-JHY	9.4189
															VF-JHY	6.45185
															VF-JHY	6.43827
															VF-JHY	6.41044
															VF-JHY	6.40836
															VF-JHY	6.36866
