# Supplementary material for: Cell-type-specific response in host plants to the co-infection by sweet potato viruses
Source: Research Square preprint supplement (doi:10.21203/rs.3.rs-5025036/v1), 2024-09-20
Supplement: Supplementary file 4 [file Table_S3.xlsx]

## Sheet: Table S3A
Table S3A Cell type specific-differentially express genes (DEGs) JHY vs VF-JHY
gene	p_val	avg_log2FC	pct.1	pct.2	p_val_adj	Cell_type	Direction_sc	log2FoldChange	p-value	q-value
g10024	1.03013e-67	1.45685	0.836	0.623	1.97126e-63	CC	Up
g10027	9.16129e-37	-1.35488	0.32	0.601	1.7531e-32	CC	Down
g10031	7.12997e-08	-0.794023	0.458	0.577	0.00136439	CC	Down	1.25211	1.40764e-05	0.000537959
g10035	0.00570466	-0.336657	0.5	0.582	1	CC	Down
g10039	1.10208e-112	1.63346	0.899	0.675	2.10893e-108	CC	Up
g10077	0.000511328	0.422122	0.305	0.239	1	CC	Up
g10078	5.79889e-26	1.10297	0.581	0.366	1.10968e-21	CC	Up
g10088	1.47291e-38	-1.47756	0.23	0.552	2.81856e-34	CC	Down
g10102	6.99406e-13	0.635379	0.643	0.516	1.33838e-08	CC	Up
g1014	7.70973e-36	1.63098	0.346	0.149	1.47533e-31	CC	Up
g10196	1.1387e-09	0.995084	0.529	0.475	2.17901e-05	CC	Up
g10238	1.40414e-20	-1.34861	0.211	0.418	2.68697e-16	CC	Down
g10264	2.76526e-18	-1.34336	0.151	0.351	5.29161e-14	CC	Down
g10265	4.21722e-21	-1.31389	0.178	0.397	8.07007e-17	CC	Down
g10283	3.36481e-11	0.985731	0.311	0.197	6.4389e-07	CC	Up
g10452	6.56765e-21	-1.05904	0.268	0.483	1.25678e-16	CC	Down
g10466	0.000126649	0.493104	0.579	0.558	1	CC	Up
g10534	4.29726e-45	-1.32072	0.325	0.646	8.22324e-41	CC	Down	1.25807	0.000461413	0.00802267
g10614	4.87033e-19	1.21402	0.357	0.2	9.31986e-15	CC	Up
g1065	1.07909e-18	-1.12666	0.25	0.454	2.06495e-14	CC	Down	1.16076	5.5214e-07	3.86468e-05
g10666	8.34733e-49	1.53627	0.502	0.235	1.59734e-44	CC	Up
g1094	6.04827e-16	-1.16045	0.103	0.275	1.1574e-11	CC	Down	2.35672	7.92496e-06	0.000341068
g1095	1.33459e-25	1.06349	0.671	0.539	2.55388e-21	CC	Up
g10997	0.00124181	0.280222	0.463	0.402	1	CC	Up	2.24466	2.03227e-09	3.73401e-07
g1104	1.20493e-16	1.38092	0.263	0.137	2.30575e-12	CC	Up
g11040	4.92311e-15	-0.709206	0.375	0.571	9.42087e-11	CC	Down
g1106	3.18261e-09	-0.501345	0.189	0.332	6.09024e-05	CC	Down
g11065	7.00697e-08	-0.596884	0.224	0.349	0.00134085	CC	Down
g1108	0.00572144	-0.253053	0.217	0.274	1	CC	Down
g1109	1.34177e-32	1.5455	0.279	0.107	2.56762e-28	CC	Up
g1111	0.000165625	0.433714	0.41	0.335	1	CC	Up
g1124	2.65084e-47	2.36399	0.393	0.162	5.07264e-43	CC	Up
g11311	6.81579e-06	-0.319688	0.322	0.422	0.130427	CC	Down
g11335	2.27574e-20	-1.21718	0.197	0.415	4.35485e-16	CC	Down
g11346	5.22709e-05	0.490802	0.252	0.181	1	CC	Up
g11405	8.81895e-15	-1.14732	0.121	0.294	1.68759e-10	CC	Down
g11474	2.37995e-13	0.515007	0.761	0.719	4.55427e-09	CC	Up
g11483	0.00965119	0.378383	0.298	0.249	1	CC	Up
g11485	3.36527e-15	-0.84851	0.279	0.469	6.43978e-11	CC	Down
g11564	5.90298e-14	-0.34142	0.287	0.495	1.12959e-09	CC	Down
g11580	0.0016123	0.577552	0.307	0.252	1	CC	Up
g11668	2.45484e-20	-1.11478	0.206	0.427	4.69758e-16	CC	Down
g11681	3.51954e-17	-0.795072	0.325	0.511	6.73499e-13	CC	Down
g11686	9.13286e-05	-0.394218	0.213	0.301	1	CC	Down	1.12426	3.45946e-06	0.000176046
g1169	6.40341e-62	-1.73967	0.285	0.657	1.22536e-57	CC	Down
g11708	2.4485e-16	1.36449	0.276	0.148	4.68544e-12	CC	Up
g1172	1.22511e-93	-1.56936	0.638	0.879	2.34436e-89	CC	Down	1.02263	1.07756e-07	1.00197e-05
g11764	2.34642e-06	0.803435	0.368	0.283	0.044901	CC	Up
g11788	1.74666e-11	-0.797919	0.184	0.337	3.34241e-07	CC	Down
g11793	1.521e-13	-1.20193	0.118	0.274	2.91058e-09	CC	Down
g11808	2.09463e-242	3.69144	0.384	0.046	4.00829e-238	CC	Up
g11812	0	4.74619	0.27	0.017	0	CC	Up	-1.21952	0.000155681	0.00349231
g11866	3.05949e-49	-1.37774	0.432	0.695	5.85464e-45	CC	Down	1.06144	1.61312e-06	9.54311e-05
g11884	0.00327783	0.384186	0.428	0.384	1	CC	Up
g11909	1.87936e-05	0.28922	0.393	0.296	0.359634	CC	Up
g1192	1.40496e-24	0.879967	0.743	0.673	2.68853e-20	CC	Up
g11937	3.78472e-187	4.23935	0.327	0.043	7.24244e-183	CC	Up
g11938	2.93394e-05	0.517415	0.257	0.182	0.561438	CC	Up
g11941	1.74644e-07	0.968538	0.263	0.175	0.00334199	CC	Up
g11949	1.23737e-07	0.466317	0.757	0.752	0.00236784	CC	Up
g11951	1.90211e-05	0.361764	0.697	0.679	0.363988	CC	Up
g1199	8.2193e-13	0.790801	0.25	0.134	1.57284e-08	CC	Up
g1206	8.78945e-05	0.576053	0.651	0.664	1	CC	Up
g12068	2.97756e-12	-2.90104	0.171	0.301	5.69786e-08	CC	Down	1.97713	0.00037237	0.00679274
g1207	0.000156147	0.449066	0.375	0.302	1	CC	Up
g12074	6.72214e-19	-1.32384	0.099	0.299	1.28635e-14	CC	Down	1.30274	1.94712e-07	1.60373e-05
g12115	0.00106087	0.584439	0.454	0.407	1	CC	Up
g12124	1.21678e-08	-0.514575	0.178	0.31	0.000232843	CC	Down
g12152	2.97092e-15	0.795774	0.629	0.495	5.68515e-11	CC	Up
g12175	2.90084e-10	-0.603443	0.217	0.362	5.55105e-06	CC	Down
g12189	3.1389e-05	0.76503	0.485	0.448	0.600661	CC	Up
g12190	0.0041486	0.304044	0.469	0.423	1	CC	Up
g12193	6.32906e-14	1.08852	0.34	0.21	1.21113e-09	CC	Up
g12200	0.00155912	0.464558	0.351	0.295	1	CC	Up
g1221	1.03798e-05	0.451689	0.32	0.235	0.198628	CC	Up
g12238	4.60268e-17	-1.20861	0.129	0.314	8.80769e-13	CC	Down
g12294	5.33869e-05	0.57943	0.292	0.214	1	CC	Up
g1235	1.83192e-13	0.509545	0.417	0.268	3.50556e-09	CC	Up
g12354	5.17739e-07	-0.716353	0.151	0.259	0.00990744	CC	Down
g12450	3.29805e-08	1.13558	0.336	0.237	0.000631114	CC	Up
g12495	2.1593e-15	0.776762	0.531	0.378	4.13203e-11	CC	Up
g12522	3.98301e-12	0.913576	0.546	0.467	7.62189e-08	CC	Up
g12524	1.3168e-38	0.981066	0.818	0.73	2.51983e-34	CC	Up
g12571	9.63888e-14	1.23126	0.325	0.195	1.8445e-09	CC	Up
g1258	1.12536e-11	1.03803	0.557	0.492	2.15348e-07	CC	Up
g12602	0.00218526	0.619818	0.357	0.309	1	CC	Up
g12603	3.40149e-05	0.422746	0.329	0.246	0.650909	CC	Up
g1264	9.26676e-07	-0.807714	0.171	0.269	0.0177329	CC	Down
g12642	1.46228e-14	1.19175	0.36	0.223	2.79822e-10	CC	Up
g12645	0.00134172	-0.441264	0.336	0.42	1	CC	Down	2.31219	6.89818e-06	0.000305833
g1265	1.93758e-33	1.68719	0.294	0.117	3.70775e-29	CC	Up
g12687	1.3212e-39	1.67755	0.311	0.116	2.52825e-35	CC	Up
g12705	3.19377e-07	-0.661572	0.217	0.332	0.0061116	CC	Down
g12711	0.00291118	0.341212	0.612	0.593	1	CC	Up
g1274	1.23676e-08	0.756582	0.268	0.17	0.000236666	CC	Up
g1276	1.95748e-17	-1.11115	0.167	0.366	3.74583e-13	CC	Down
g1281	3.40935e-17	-1.38863	0.096	0.276	6.52414e-13	CC	Down
g12819	3.99581e-33	-1.31921	0.186	0.48	7.64639e-29	CC	Down
g12834	2.87998e-09	-0.605614	0.151	0.289	5.51112e-05	CC	Down
g12836	3.16479e-11	-0.955648	0.18	0.327	6.05615e-07	CC	Down
g12843	2.71176e-44	-1.62722	0.224	0.556	5.18922e-40	CC	Down
g12846	2.61363e-06	0.417171	0.743	0.769	0.0500144	CC	Up
g12849	8.93933e-20	-1.22265	0.16	0.371	1.71063e-15	CC	Down
g12851	1.10045e-08	-0.595704	0.18	0.308	0.000210583	CC	Down
g12892	4.38259e-21	-0.854997	0.395	0.598	8.38653e-17	CC	Down
g1290	1.22281e-17	-1.26504	0.112	0.3	2.33997e-13	CC	Down	1.08404	1.64307e-08	2.01908e-06
g12904	0.00327754	0.407092	0.268	0.214	1	CC	Up
g1306	1.11488e-38	-2.0552	0.116	0.434	2.13344e-34	CC	Down	2.23072	1.00666e-10	2.65588e-08
g13073	2.33981e-12	-1.00358	0.145	0.296	4.47746e-08	CC	Down
g13081	2.96393e-39	-1.2402	0.39	0.667	5.67177e-35	CC	Down
g13110	1.33643e-06	0.660253	0.342	0.26	0.0255739	CC	Up
g13123	4.00192e-18	-1.18721	0.132	0.329	7.65807e-14	CC	Down
g13124	1.86375e-29	0.903036	0.882	0.809	3.56646e-25	CC	Up
g13128	1.36341e-35	-2.11908	0.096	0.39	2.60903e-31	CC	Down
g13130	2.0155e-31	1.62542	0.395	0.203	3.85687e-27	CC	Up
g13138	1.58735e-06	0.438877	0.632	0.617	0.0303756	CC	Up
g13155	5.60797e-18	-1.48563	0.101	0.282	1.07314e-13	CC	Down
g13163	7.33634e-10	-1.3152	0.184	0.305	1.40388e-05	CC	Down
g13164	3.41086e-18	-0.797462	0.586	0.744	6.52702e-14	CC	Down
g13183	3.19313e-17	-1.38979	0.092	0.271	6.11037e-13	CC	Down	1.00566	1.12806e-05	0.000452373
g1319	7.65766e-09	0.740116	0.382	0.275	0.000146537	CC	Up
g13218	1.14242e-13	1.06677	0.412	0.281	2.18614e-09	CC	Up
g13219	3.52631e-37	-1.89152	0.145	0.448	6.74795e-33	CC	Down
g13238	5.97103e-41	-1.70715	0.243	0.547	1.14262e-36	CC	Down
g13247	9.83035e-23	0.847523	0.276	0.122	1.88114e-18	CC	Up
g13253	1.5525e-19	1.83423	0.364	0.217	2.97086e-15	CC	Up
g13255	1.50726e-06	0.720244	0.316	0.232	0.0288429	CC	Up
g13268	1.27706e-10	0.960889	0.39	0.282	2.44379e-06	CC	Up
g13289	0.00357764	0.485524	0.452	0.418	1	CC	Up
g13298	1.21338e-10	-0.991928	0.129	0.262	2.32193e-06	CC	Down
g13299	3.98923e-41	1.36021	0.662	0.46	7.63378e-37	CC	Up
g13303	7.25883e-28	-1.72735	0.164	0.412	1.38905e-23	CC	Down
g1331	2.52991e-20	1.27816	0.406	0.243	4.84123e-16	CC	Up
g13316	0.00789367	0.541069	0.794	0.816	1	CC	Up
g13324	1.37661e-46	-1.49804	0.186	0.55	2.63428e-42	CC	Down
g13337	7.20314e-14	0.822232	0.739	0.713	1.37839e-09	CC	Up
g13352	0.000365737	0.71487	0.292	0.231	1	CC	Up
g13355	3.32871e-11	0.794516	0.395	0.265	6.36982e-07	CC	Up
g13371	2.10126e-09	-0.488823	0.355	0.498	4.02097e-05	CC	Down
g13381	1.80521e-11	0.391713	0.513	0.375	3.45444e-07	CC	Up	1.35887	4.00463e-06	0.000196211
g13403	9.45582e-25	-1.11169	0.241	0.488	1.80947e-20	CC	Down
g13408	1.09221e-29	-1.21589	0.257	0.531	2.09005e-25	CC	Down
g1341	3.87918e-08	-0.586262	0.408	0.536	0.000742321	CC	Down
g13427	6.87421e-27	0.908308	0.796	0.74	1.31545e-22	CC	Up
g13429	1.73146e-11	0.681699	0.489	0.36	3.31333e-07	CC	Up
g13464	6.97359e-05	0.367736	0.355	0.279	1	CC	Up
g13467	1.29371e-15	1.19673	0.34	0.204	2.47565e-11	CC	Up	1.01274	0.000474568	0.00818759
g13482	1.99107e-12	0.715051	0.526	0.394	3.81012e-08	CC	Up
g13494	0.00351766	0.884372	0.401	0.361	1	CC	Up
g13499	2.72142e-08	0.527169	0.309	0.202	0.000520771	CC	Up
g13501	1.32162e-30	1.74437	0.32	0.14	2.52906e-26	CC	Up
g13520	3.74996e-78	1.96804	0.428	0.133	7.17592e-74	CC	Up	-1.55231	0.00279103	0.030191
g13529	0.000110286	-0.391466	0.425	0.508	1	CC	Down
g13531	4.41229e-24	1.25895	0.456	0.271	8.44337e-20	CC	Up
g13533	2.23102e-35	1.17656	0.59	0.376	4.26928e-31	CC	Up
g13541	4.85609e-42	0.646769	0.934	0.897	9.29262e-38	CC	Up
g13544	3.33407e-14	0.675503	0.568	0.451	6.38007e-10	CC	Up
g13550	8.90273e-06	-0.324068	0.268	0.375	0.170363	CC	Down
g13555	3.4525e-62	2.39037	0.336	0.104	6.6067e-58	CC	Up
g13559	4.74604e-07	0.673123	0.274	0.184	0.00908202	CC	Up
g13564	4.81647e-101	-1.60898	0.785	0.931	9.2168e-97	CC	Down	1.40499	8.32299e-08	7.99195e-06
g13566	2.40953e-21	1.18046	0.461	0.297	4.61088e-17	CC	Up
g13570	1.52061e-10	0.556572	0.689	0.611	2.90983e-06	CC	Up
g13575	5.01865e-09	0.848969	0.511	0.428	9.60368e-05	CC	Up
g13592	1.94462e-49	-1.3476	0.55	0.764	3.72122e-45	CC	Down
g13605	5.41626e-08	-0.935053	0.232	0.345	0.00103646	CC	Down
g13640	3.94395e-10	0.788601	0.305	0.192	7.54715e-06	CC	Up
g13650	1.05838e-22	-1.37804	0.154	0.379	2.02532e-18	CC	Down
g13653	1.55771e-11	0.866986	0.311	0.193	2.98084e-07	CC	Up
g13661	0.000475448	0.62134	0.443	0.404	1	CC	Up
g13696	1.06631e-24	0.959061	0.377	0.185	2.04049e-20	CC	Up
g137	2.94163e-35	1.54328	0.57	0.347	5.62911e-31	CC	Up
g13710	0.000243543	0.509543	0.386	0.321	1	CC	Up
g13711	6.01877e-20	-1.99403	0.068	0.253	1.15175e-15	CC	Down
g13713	0.00298111	0.505533	0.507	0.485	1	CC	Up
g13717	4.43536e-10	-0.680273	0.178	0.319	8.48751e-06	CC	Down
g13769	4.7122e-05	0.588122	0.283	0.206	0.901726	CC	Up
g13780	0.00224488	0.378317	0.303	0.241	1	CC	Up
g13791	2.45481e-20	1.2601	0.32	0.169	4.69753e-16	CC	Up
g13792	1.37115e-23	-1.30895	0.162	0.393	2.62383e-19	CC	Down
g13827	3.47845e-07	-0.652387	0.143	0.251	0.00665637	CC	Down
g13834	2.65447e-76	-1.53246	0.588	0.823	5.07959e-72	CC	Down
g13856	4.87118e-08	0.842673	0.252	0.161	0.000932149	CC	Up
g13858	9.23922e-50	1.9471	0.333	0.115	1.76802e-45	CC	Up
g13864	3.12927e-140	2.40719	0.719	0.259	5.98818e-136	CC	Up
g13867	5.18312e-23	1.45304	0.274	0.122	9.91842e-19	CC	Up
g13877	5.2002e-10	0.882229	0.272	0.166	9.9511e-06	CC	Up
g1388	4.61473e-17	1.49965	0.289	0.154	8.83074e-13	CC	Up
g13908	4.28448e-07	0.793125	0.261	0.176	0.00819877	CC	Up
g13977	0	5.88204	0.548	0.034	0	CC	Up
g13992	1.16117e-05	-0.700678	0.191	0.281	0.222202	CC	Down
g14077	0.00484375	0.619129	0.386	0.345	1	CC	Up
g14093	3.62004e-28	-1.63399	0.099	0.355	6.92731e-24	CC	Down	1.95922	4.16252e-07	3.04895e-05
g14100	1.83365e-06	0.351413	0.555	0.446	0.0350887	CC	Up
g14106	1.6548e-09	0.706937	0.292	0.184	3.16662e-05	CC	Up
g14160	3.42144e-10	0.873998	0.456	0.34	6.54726e-06	CC	Up
g14242	7.30442e-12	-0.922819	0.171	0.326	1.39777e-07	CC	Down
g14255	5.94934e-14	-0.954703	0.134	0.304	1.13847e-09	CC	Down
g14260	1.41469e-19	0.845243	0.726	0.651	2.70714e-15	CC	Up
g14262	3.15197e-15	0.660553	0.689	0.584	6.03161e-11	CC	Up
g14271	2.42899e-07	1.12823	0.294	0.212	0.00464811	CC	Up
g14285	3.78719e-75	3.39842	0.432	0.152	7.24716e-71	CC	Up
g14294	2.1458e-16	0.351829	0.715	0.536	4.1062e-12	CC	Up
g14349	9.90075e-31	1.35881	0.3	0.12	1.89461e-26	CC	Up
g1436	1.98792e-13	-0.791495	0.191	0.358	3.80409e-09	CC	Down
g14390	1.00901e-26	1.19301	0.349	0.168	1.93085e-22	CC	Up
g14398	1.45832e-27	1.10352	0.425	0.223	2.79065e-23	CC	Up
g14521	8.53772e-15	-1.10015	0.107	0.273	1.63378e-10	CC	Down
g14547	0.00987777	0.629855	0.605	0.603	1	CC	Up
g146	2.99212e-90	1.38867	0.945	0.849	5.72572e-86	CC	Up
g14605	1.22381e-38	1.7266	0.252	0.084	2.34188e-34	CC	Up
g14612	6.46447e-06	0.574677	0.342	0.252	0.123704	CC	Up
g14632	0.000124736	0.519385	0.513	0.464	1	CC	Up
g1466	5.5402e-09	0.580415	0.397	0.282	0.000106017	CC	Up
g14672	1.87321e-08	-0.473394	0.322	0.458	0.000358458	CC	Down
g14677	1.12073e-14	0.939094	0.401	0.256	2.14463e-10	CC	Up
g14702	4.55821e-46	-2.19632	0.125	0.47	8.72258e-42	CC	Down
g1477	8.31242e-16	-0.923719	0.195	0.377	1.59066e-11	CC	Down
g14810	5.9561e-07	1.10066	0.39	0.322	0.0113976	CC	Up
g14824	3.28398e-33	-2.34173	0.09	0.364	6.28423e-29	CC	Down
g14825	1.54042e-05	0.485973	0.55	0.495	0.294775	CC	Up
g1483	3.54781e-16	1.10404	0.368	0.22	6.78909e-12	CC	Up
g14843	1.72427e-11	-0.926312	0.14	0.282	3.29957e-07	CC	Down
g1485	1.41396e-07	0.776941	0.298	0.208	0.00270576	CC	Up
g14859	5.96706e-208	4.13724	0.252	0.023	1.14186e-203	CC	Up
g14945	4.11004e-12	1.13184	0.316	0.199	7.86498e-08	CC	Up
g15098	1.20988e-06	-0.39828	0.193	0.309	0.0231523	CC	Down
g15185	3.49427e-163	3.62953	0.259	0.031	6.68664e-159	CC	Up
g15222	2.46787e-23	0.975339	0.522	0.335	4.72252e-19	CC	Up
g153	8.0182e-06	0.77787	0.346	0.268	0.153436	CC	Up
g15319	1.02371e-08	0.725329	0.346	0.239	0.000195897	CC	Up
g155	1.97539e-18	0.826667	0.366	0.201	3.78011e-14	CC	Up
g15599	3.0933e-09	-0.943408	0.143	0.263	5.91933e-05	CC	Down
g15633	3.15943e-216	4.60891	0.27	0.026	6.04589e-212	CC	Up
g15692	6.01433e-18	-0.931524	0.224	0.424	1.1509e-13	CC	Down
g157	1.97531e-41	1.51263	0.612	0.393	3.77995e-37	CC	Up
g15856	4.82202e-12	0.63183	0.375	0.234	9.22742e-08	CC	Up	4.89646	1.28617e-11	4.27423e-09
g15866	5.36067e-12	-0.908335	0.145	0.295	1.02582e-07	CC	Down
g15891	4.63326e-20	1.4405	0.252	0.116	8.8662e-16	CC	Up
g15906	1.17653e-06	-0.301738	0.471	0.588	0.0225142	CC	Down
g15915	0.000115262	0.402984	0.272	0.196	1	CC	Up
g16151	3.71641e-11	1.12938	0.362	0.251	7.11172e-07	CC	Up
g1620	0.000547491	0.490046	0.414	0.361	1	CC	Up
g16207	5.33447e-12	0.743392	0.366	0.238	1.0208e-07	CC	Up
g16217	3.9774e-55	1.62137	0.684	0.458	7.61116e-51	CC	Up
g16295	1.28212e-20	-1.204	0.204	0.414	2.45347e-16	CC	Down	1.50887	1.69476e-10	4.23326e-08
g163	2.16505e-14	-1.14023	0.156	0.322	4.14305e-10	CC	Down
g16326	2.22117e-242	3.46948	0.432	0.059	4.25044e-238	CC	Up
g16369	6.85498e-30	0.868771	0.393	0.182	1.31177e-25	CC	Up
g16375	0.00517657	0.590293	0.566	0.576	1	CC	Up
g16471	1.10943e-08	0.694749	0.316	0.212	0.0002123	CC	Up
g16474	0.000553013	0.571326	0.763	0.822	1	CC	Up
g16488	0.000351528	0.725107	0.379	0.319	1	CC	Up
g16514	1.52991e-05	0.536447	0.393	0.307	0.292763	CC	Up
g16577	6.62105e-13	0.896636	0.296	0.171	1.267e-08	CC	Up
g16584	0.00850184	0.579405	0.531	0.521	1	CC	Up
g16688	5.56528e-24	-0.803305	0.452	0.685	1.06497e-19	CC	Down
g16690	5.46064e-09	1.05178	0.279	0.176	0.000104495	CC	Up
g16700	9.27087e-14	-0.555832	0.357	0.528	1.77407e-09	CC	Down
g16707	5.89089e-07	-0.513206	0.189	0.304	0.0112728	CC	Down
g16715	1.41333e-27	-0.942483	0.489	0.684	2.70455e-23	CC	Down
g16732	1.21597e-45	2.40294	0.572	0.354	2.32688e-41	CC	Up
g16744	1.20732e-24	1.57387	0.491	0.324	2.31032e-20	CC	Up
g16764	0.00405315	-0.347446	0.217	0.281	1	CC	Down
g16780	2.28079e-26	1.5549	0.331	0.157	4.36452e-22	CC	Up
g16786	4.87249e-05	0.519263	0.265	0.191	0.932399	CC	Up
g16805	1.35336e-32	-1.59408	0.162	0.449	2.58979e-28	CC	Down	1.06653	1.21931e-05	0.000483387
g16821	5.70933e-31	-0.957435	0.417	0.675	1.09254e-26	CC	Down
g16865	1.74772e-14	0.992899	0.373	0.23	3.34443e-10	CC	Up
g16875	2.73132e-15	0.725066	0.8	0.807	5.22665e-11	CC	Up
g16882	3.76319e-09	0.999798	0.715	0.695	7.20124e-05	CC	Up
g16912	2.77188e-19	-1.69573	0.092	0.281	5.30426e-15	CC	Down
g16914	0.00274419	0.263117	0.772	0.797	1	CC	Up
g16925	4.68642e-81	-2.16617	0.279	0.698	8.96794e-77	CC	Down
g16942	1.26372e-07	-0.619774	0.16	0.271	0.00241825	CC	Down
g16958	1.4245e-89	-1.94975	0.351	0.765	2.72593e-85	CC	Down	1.0739	0.000546903	0.00911116
g16971	0.000446784	-0.27298	0.55	0.651	1	CC	Down
g16972	2.04142e-08	0.846155	0.362	0.266	0.000390646	CC	Up
g16990	1.4129e-18	0.990458	0.362	0.203	2.70373e-14	CC	Up
g17005	1.98554e-05	0.810517	0.476	0.423	0.379953	CC	Up
g17016	2.73708e-18	-1.09041	0.184	0.386	5.23767e-14	CC	Down	1.53016	0.000585111	0.00957069
g17023	2.0037e-09	1.01815	0.272	0.173	3.83429e-05	CC	Up
g17051	2.3589e-06	0.544492	0.311	0.226	0.0451398	CC	Up
g17053	1.67136e-06	0.843726	0.292	0.211	0.0319832	CC	Up
g17056	3.49803e-10	1.05673	0.259	0.157	6.69383e-06	CC	Up
g17087	1.40986e-37	1.495	0.658	0.499	2.69792e-33	CC	Up
g17178	2.66306e-21	1.50791	0.292	0.143	5.09603e-17	CC	Up
g17179	1.26165e-05	0.351541	0.761	0.771	0.24143	CC	Up
g17201	1.11558e-09	-0.858531	0.173	0.309	2.13477e-05	CC	Down	2.75388	3.53575e-08	3.87045e-06
g17206	1.2046e-08	-1.10284	0.149	0.262	0.000230511	CC	Down
g17223	4.9974e-19	-1.26903	0.094	0.291	9.56302e-15	CC	Down	1.62201	8.7687e-07	5.73824e-05
g17242	1.81573e-17	-1.43365	0.136	0.325	3.47459e-13	CC	Down	1.52282	5.43662e-07	3.84051e-05
g17252	1.43007e-27	1.63213	0.261	0.107	2.73658e-23	CC	Up
g173	0.000425878	0.604784	0.401	0.352	1	CC	Up
g17317	7.84494e-13	0.788089	0.289	0.165	1.50121e-08	CC	Up	-2.534	6.07168e-05	0.00170619
g17338	3.31769e-85	2.81954	0.454	0.151	6.34873e-81	CC	Up
g17340	1.62056e-07	0.373681	0.873	0.865	0.0031011	CC	Up
g17345	6.09401e-101	2.94515	0.252	0.044	1.16615e-96	CC	Up
g17367	4.65443e-10	-0.663339	0.2	0.344	8.90671e-06	CC	Down
g17371	5.66419e-09	1.08414	0.257	0.162	0.00010839	CC	Up
g17392	0.000229099	-0.33733	0.254	0.347	1	CC	Down
g17396	1.57942e-18	-1.02792	0.2	0.408	3.02238e-14	CC	Down	2.44824	4.87527e-08	5.06299e-06
g17401	2.71275e-13	0.589127	0.572	0.432	5.19112e-09	CC	Up
g17408	6.16148e-34	1.74766	0.404	0.193	1.17906e-29	CC	Up
g17415	1.35404e-16	-1.57109	0.083	0.255	2.59109e-12	CC	Down
g17428	0.000365924	-0.340095	0.193	0.267	1	CC	Down
g17437	0.00382249	0.623238	0.342	0.29	1	CC	Up
g17439	1.70732e-17	0.891571	0.616	0.53	3.26712e-13	CC	Up
g17446	9.12289e-43	2.02745	0.285	0.096	1.74576e-38	CC	Up
g17456	2.33911e-30	-0.911966	0.417	0.662	4.47611e-26	CC	Down
g17459	2.68505e-47	-1.86295	0.217	0.558	5.13812e-43	CC	Down	1.21195	8.67667e-06	0.000364792
g17472	8.28583e-09	1.0647	0.651	0.643	0.000158558	CC	Up
g17498	2.36963e-22	1.76063	0.292	0.138	4.53453e-18	CC	Up
g17499	1.42201e-08	1.12239	0.261	0.168	0.000272116	CC	Up
g17541	6.64356e-18	0.936643	0.5	0.351	1.27131e-13	CC	Up
g17583	4.92781e-05	0.58486	0.263	0.191	0.942986	CC	Up
g17703	0.00011484	-0.257964	0.195	0.286	1	CC	Down	1.57656	2.58534e-10	6.02463e-08
g17743	1.52714e-13	-0.50522	0.3	0.506	2.92234e-09	CC	Down
g17749	1.9569e-25	-1.61893	0.101	0.335	3.74472e-21	CC	Down	1.36402	6.9621e-07	4.74871e-05
g17847	8.85934e-55	0.766622	0.939	0.915	1.69532e-50	CC	Up
g17853	2.42617e-23	0.856897	0.651	0.496	4.64272e-19	CC	Up
g17891	3.1998e-22	1.01231	0.478	0.295	6.12313e-18	CC	Up
g179	5.50569e-10	-0.589661	0.333	0.471	1.05357e-05	CC	Down
g17905	2.20676e-38	-1.36444	0.379	0.631	4.22285e-34	CC	Down	1.1792	1.46614e-08	1.84314e-06
g17947	2.95906e-92	-1.65343	0.555	0.836	5.66245e-88	CC	Down
g1822	1.51423e-30	-1.706	0.127	0.4	2.89763e-26	CC	Down
g18227	1.27771e-10	0.774897	0.261	0.153	2.44502e-06	CC	Up
g18461	1.16177e-13	-0.764451	0.096	0.255	2.22316e-09	CC	Down
g18506	3.06061e-31	-1.43996	0.195	0.476	5.85678e-27	CC	Down
g1857	3.10488e-08	0.869238	0.254	0.162	0.000594149	CC	Up
g1862	2.13096e-13	0.849771	0.357	0.225	4.07781e-09	CC	Up
g1863	4.81882e-22	-1.2084	0.215	0.44	9.22128e-18	CC	Down	1.70003	7.3687e-11	2.04923e-08
g18690	1.37985e-05	1.041	0.379	0.309	0.264049	CC	Up
g18764	3.81724e-47	2.10584	0.344	0.127	7.30466e-43	CC	Up
g18954	3.24738e-08	0.939728	0.57	0.494	0.000621419	CC	Up	1.07458	0.000705937	0.010967
g19032	8.79375e-05	0.514234	0.27	0.198	1	CC	Up
g19275	0.000306023	0.43003	0.421	0.361	1	CC	Up
g19278	8.23574e-05	0.381508	0.364	0.283	1	CC	Up
g19281	1.27672e-06	-0.302799	0.241	0.372	0.0244314	CC	Down	2.55085	9.85315e-06	0.000407972
g193	2.33213e-14	-1.28386	0.123	0.283	4.46276e-10	CC	Down
g19337	3.24691e-24	-1.61218	0.123	0.355	6.21328e-20	CC	Down
g19459	1.3817e-11	0.86321	0.458	0.34	2.64402e-07	CC	Up
g19479	1.82833e-50	-1.35647	0.45	0.719	3.4987e-46	CC	Down	1.05384	9.49184e-09	1.2818e-06
g195	4.89621e-42	1.9999	0.285	0.097	9.36939e-38	CC	Up
g19543	4.26266e-09	0.627815	0.388	0.273	8.15702e-05	CC	Up
g19544	1.2513e-09	1.38351	0.318	0.223	2.39449e-05	CC	Up
g19559	1.06886e-06	-0.35092	0.331	0.468	0.0204537	CC	Down	1.99042	3.87766e-08	4.16271e-06
g196	4.97032e-05	0.55683	0.357	0.276	0.95112	CC	Up
g19619	3.90915e-33	1.61601	0.485	0.272	7.48056e-29	CC	Up
g19638	2.99485e-11	-0.727587	0.217	0.367	5.73094e-07	CC	Down
g19670	9.24883e-15	-0.917896	0.158	0.335	1.76986e-10	CC	Down
g19675	3.19763e-67	1.4877	0.928	0.772	6.11898e-63	CC	Up
g19690	2.41971e-18	-0.942546	0.178	0.377	4.63036e-14	CC	Down
g19709	3.29271e-20	-0.926671	0.283	0.493	6.30094e-16	CC	Down
g1972	0.00118234	0.565272	0.375	0.316	1	CC	Up
g19751	9.09606e-07	0.601689	0.377	0.284	0.0174062	CC	Up
g19770	3.81635e-42	-1.48574	0.294	0.597	7.30297e-38	CC	Down
g19789	1.47079e-15	0.729046	0.572	0.443	2.8145e-11	CC	Up
g19902	2.78936e-20	-2.09472	0.064	0.253	5.33771e-16	CC	Down	1.95902	1.56869e-08	1.94644e-06
g19907	4.04029e-17	1.79192	0.25	0.128	7.7315e-13	CC	Up
g19964	1.46793e-17	1.55883	0.346	0.205	2.80902e-13	CC	Up
g19971	5.38323e-30	-1.83106	0.107	0.371	1.03013e-25	CC	Down	1.82523	2.30351e-08	2.7004e-06
g20016	8.90201e-06	0.622505	0.331	0.25	0.170349	CC	Up
g20020	2.37299e-25	1.12917	0.531	0.356	4.54096e-21	CC	Up
g20022	3.95009e-103	-1.63834	0.708	0.921	7.5589e-99	CC	Down	1.25783	1.23951e-11	4.19207e-09
g20025	1.90934e-47	1.55287	0.539	0.272	3.65371e-43	CC	Up	1.57937	0.000148447	0.00336887
g20042	4.39571e-17	1.10009	0.349	0.204	8.41163e-13	CC	Up
g20112	4.23919e-29	1.88177	0.353	0.177	8.11212e-25	CC	Up
g20149	1.14042e-53	-1.84134	0.189	0.573	2.18231e-49	CC	Down
g20154	0.000217876	0.580844	0.423	0.375	1	CC	Up
g20157	2.28161e-06	0.274299	0.965	0.958	0.0436609	CC	Up
g20189	7.71967e-30	-1.86497	0.105	0.365	1.47724e-25	CC	Down
g2024	2.41271e-92	3.0497	0.25	0.046	4.61697e-88	CC	Up
g20248	7.74048e-31	-1.41715	0.182	0.453	1.48122e-26	CC	Down
g20278	4.39686e-38	-1.07547	0.5	0.73	8.41382e-34	CC	Down
g20289	5.23613e-19	1.20274	0.45	0.301	1.00198e-14	CC	Up
g20297	9.77397e-15	0.975094	0.566	0.463	1.87035e-10	CC	Up	-1.01592	0.00186755	0.0224413
g20337	2.87056e-05	0.478667	0.331	0.249	0.54931	CC	Up
g20351	3.45679e-06	0.785866	0.373	0.292	0.0661492	CC	Up
g20353	0	5.60573	0.338	0.014	0	CC	Up
g20355	1.94164e-07	0.495883	0.518	0.408	0.00371552	CC	Up
g20358	2.50174e-73	-1.52726	0.529	0.803	4.78733e-69	CC	Down
g20376	4.68821e-11	0.560476	0.735	0.717	8.97136e-07	CC	Up
g20390	0.000149403	0.5061	0.445	0.377	1	CC	Up
g20406	0.000205464	-0.261646	0.579	0.659	1	CC	Down
g20409	2.31667e-22	0.884026	0.768	0.734	4.43319e-18	CC	Up
g20442	2.2516e-10	0.466206	0.59	0.457	4.30865e-06	CC	Up
g20448	9.04318e-08	0.338521	0.649	0.56	0.0017305	CC	Up
g20458	3.11585e-53	-1.7573	0.257	0.611	5.96248e-49	CC	Down
g20467	1.14029e-33	-1.51063	0.208	0.497	2.18205e-29	CC	Down
g20475	4.97564e-08	-0.338954	0.39	0.528	0.000952138	CC	Down
g20481	8.47877e-06	0.58487	0.27	0.189	0.16225	CC	Up
g2049	1.38302e-20	1.25643	0.287	0.137	2.64655e-16	CC	Up
g20497	7.3065e-209	3.53071	0.5	0.09	1.39817e-204	CC	Up
g20498	8.06621e-17	1.08683	0.625	0.516	1.54355e-12	CC	Up
g20515	7.98234e-18	1.38274	0.254	0.124	1.5275e-13	CC	Up
g20519	1.57517e-19	-1.03385	0.208	0.419	3.01424e-15	CC	Down
g20526	4.13051e-12	-0.825513	0.228	0.385	7.90415e-08	CC	Down
g20560	0.000705431	0.499876	0.511	0.462	1	CC	Up
g20578	1.69606e-21	-0.828597	0.421	0.641	3.24557e-17	CC	Down
g20583	3.38835e-48	3.22113	0.384	0.152	6.48395e-44	CC	Up	1.79666	3.26458e-06	0.000167917
g20584	5.81352e-33	1.40523	0.39	0.183	1.11247e-28	CC	Up	-1.27542	1.74343e-06	0.000101568
g20590	5.0439e-08	-0.487689	0.239	0.357	0.000965201	CC	Down
g20591	1.58588e-05	0.469227	0.386	0.306	0.303474	CC	Up
g20592	0.00102311	0.342798	0.871	0.829	1	CC	Up
g20598	5.24239e-16	1.22914	0.252	0.128	1.00318e-11	CC	Up
g20603	7.72219e-26	1.02875	0.41	0.213	1.47772e-21	CC	Up
g20605	3.05117e-05	0.420997	0.496	0.415	0.583872	CC	Up
g20606	2.95293e-09	0.617116	0.487	0.374	5.65074e-05	CC	Up
g20607	2.96934e-28	2.13451	0.276	0.117	5.68213e-24	CC	Up
g20614	2.8647e-25	-2.61976	0.061	0.28	5.48188e-21	CC	Down
g20618	3.56618e-08	0.940814	0.43	0.344	0.000682424	CC	Up
g2062	1.47695e-12	0.973515	0.454	0.336	2.8263e-08	CC	Up
g20621	7.77576e-11	-0.694515	0.219	0.369	1.48797e-06	CC	Down
g20623	6.94823e-34	-1.78245	0.145	0.431	1.32961e-29	CC	Down
g20638	1.83321e-14	-0.935468	0.259	0.44	3.50802e-10	CC	Down
g20663	1.65677e-13	-1.20552	0.101	0.253	3.17039e-09	CC	Down
g20666	0.00903481	0.412402	0.482	0.453	1	CC	Up
g20672	3.1871e-16	-1.45795	0.134	0.307	6.09883e-12	CC	Down
g20674	1.08056e-23	1.57009	0.254	0.11	2.06776e-19	CC	Up
g20676	2.9749e-35	-1.0839	0.441	0.682	5.69277e-31	CC	Down
g20688	4.10118e-27	1.7503	0.25	0.101	7.84802e-23	CC	Up
g20690	2.42992e-12	1.49948	0.316	0.2	4.64989e-08	CC	Up
g20702	2.04733e-07	-0.485379	0.186	0.303	0.00391777	CC	Down
g20715	3.05518e-34	-1.07335	0.379	0.645	5.84638e-30	CC	Down
g20716	1.21405e-31	0.896588	0.899	0.901	2.32321e-27	CC	Up
g20719	0.000307227	-0.2959	0.261	0.342	1	CC	Down
g20722	2.90258e-93	2.61922	0.397	0.107	5.55437e-89	CC	Up
g20723	8.43121e-38	-1.26335	0.289	0.593	1.6134e-33	CC	Down
g20726	3.35999e-11	1.01635	0.259	0.152	6.42968e-07	CC	Up
g20728	7.75401e-07	0.885286	0.27	0.182	0.0148381	CC	Up
g2073	1.54253e-07	0.798027	0.371	0.281	0.00295179	CC	Up
g20730	0.00202308	0.552322	0.366	0.329	1	CC	Up
g20732	1.61114e-21	1.00372	0.454	0.276	3.08308e-17	CC	Up
g20733	6.21368e-08	0.67532	0.32	0.222	0.00118905	CC	Up
g20738	0.00223372	0.488917	0.298	0.246	1	CC	Up	1.03193	0.000160832	0.00358398
g20781	2.09133e-10	-0.984928	0.16	0.291	4.00197e-06	CC	Down
g20788	0.000685008	0.383882	0.32	0.253	1	CC	Up
g20810	4.09009e-84	-1.53841	0.658	0.876	7.82679e-80	CC	Down	1.55257	4.90274e-10	1.04675e-07
g20813	2.55378e-33	1.64757	0.254	0.092	4.88692e-29	CC	Up
g20836	1.37981e-05	0.714307	0.274	0.198	0.26404	CC	Up
g20843	2.90758e-14	0.890593	0.34	0.199	5.56394e-10	CC	Up
g20847	5.55484e-26	-1.75713	0.2	0.435	1.06297e-21	CC	Down
g20857	0	5.7739	0.434	0.019	0	CC	Up
g20967	1.06452e-37	1.77517	0.43	0.204	2.03706e-33	CC	Up
g21004	1.56171e-45	-1.89146	0.211	0.551	2.98848e-41	CC	Down
g21133	5.57367e-59	-1.58343	0.397	0.702	1.06658e-54	CC	Down
g21284	1.55037e-14	-1.23205	0.116	0.278	2.96679e-10	CC	Down
g21286	6.21815e-07	0.904667	0.252	0.17	0.0118991	CC	Up
g21290	2.41521e-17	-1.10846	0.112	0.304	4.62175e-13	CC	Down
g21429	8.0528e-12	0.737784	0.454	0.332	1.54098e-07	CC	Up
g21451	1.92246e-09	0.569769	0.32	0.213	3.67882e-05	CC	Up
g21453	1.08032e-44	1.28933	0.796	0.692	2.06731e-40	CC	Up
g21469	0.000726783	0.610205	0.318	0.256	1	CC	Up
g21474	1.94486e-38	0.842741	0.93	0.894	3.72169e-34	CC	Up	1.17295	0.00123368	0.0164564
g21475	1.4367e-48	1.97151	0.465	0.211	2.74927e-44	CC	Up	-1.34638	4.0111e-05	0.00121267
g21484	0.00558724	-0.349742	0.239	0.3	1	CC	Down
g21485	9.39664e-15	0.643059	0.443	0.286	1.79814e-10	CC	Up
g21513	9.53093e-59	-1.69818	0.237	0.637	1.82384e-54	CC	Down
g21517	1.40256e-11	-0.896302	0.143	0.287	2.68395e-07	CC	Down
g21557	1.23623e-44	-1.32036	0.373	0.664	2.36565e-40	CC	Down	1.01073	8.01098e-07	5.38059e-05
g21576	1.38838e-25	-1.32098	0.167	0.415	2.65681e-21	CC	Down	1.36001	1.11425e-07	1.01987e-05
g21652	1.05463e-05	0.575114	0.311	0.231	0.201814	CC	Up
g21675	0.000807027	0.36747	0.274	0.213	1	CC	Up
g217	0.000128968	0.460915	0.434	0.375	1	CC	Up
g21704	5.0211e-19	-0.940821	0.25	0.463	9.60837e-15	CC	Down
g21709	6.3292e-30	1.09254	0.632	0.431	1.21116e-25	CC	Up
g21727	0.00048925	0.270807	0.406	0.331	1	CC	Up
g21739	5.54304e-48	-1.49215	0.318	0.632	1.06072e-43	CC	Down
g21844	7.65578e-51	-1.55604	0.309	0.636	1.46501e-46	CC	Down
g219	7.67584e-15	-0.568657	0.5	0.643	1.46885e-10	CC	Down
g2195	8.17704e-05	1.18843	0.254	0.194	1	CC	Up	-1.54152	2.34885e-08	2.73677e-06
g221	2.11215e-07	1.25668	0.292	0.203	0.00404181	CC	Up
g22103	2.60481e-05	0.449255	0.447	0.365	0.498457	CC	Up
g22249	0.00124903	-0.408122	0.294	0.364	1	CC	Down	1.01984	5.68925e-06	0.000262909
g22260	0.0044694	0.284743	0.316	0.264	1	CC	Up
g224	3.48319e-46	2.47555	0.27	0.086	6.66543e-42	CC	Up
g22408	1.9127e-06	-0.346562	0.184	0.289	0.0366014	CC	Down
g22416	1.39429e-29	0.923232	0.809	0.751	2.66812e-25	CC	Up
g22580	0.0045074	0.442197	0.507	0.508	1	CC	Up
g2267	1.07978e-54	1.35362	0.717	0.455	2.06626e-50	CC	Up
g22892	8.82745e-09	0.733306	0.371	0.267	0.000168922	CC	Up
g23055	8.75713e-21	-1.39011	0.178	0.383	1.67577e-16	CC	Down
g23130	1.38152e-08	0.902525	0.379	0.281	0.000264368	CC	Up
g2316	9.32902e-09	0.566487	0.794	0.824	0.00017852	CC	Up	2.26584	3.71921e-05	0.00114534
g23187	1.29615e-21	1.23142	0.669	0.588	2.4803e-17	CC	Up
g23233	4.81879e-09	0.646705	0.636	0.559	9.22124e-05	CC	Up
g23238	3.10164e-11	0.876053	0.654	0.59	5.93531e-07	CC	Up
g23292	5.39814e-23	1.28454	0.333	0.166	1.03299e-18	CC	Up
g233	1.19637e-05	-0.594873	0.18	0.265	0.228937	CC	Down
g23363	2.73833e-24	1.42393	0.441	0.261	5.24008e-20	CC	Up
g23394	1.1614e-09	-0.264166	0.792	0.862	2.22245e-05	CC	Down
g23446	1.49594e-12	1.07401	0.254	0.141	2.86263e-08	CC	Up	-1.15042	0.000872545	0.0127635
g23456	8.44568e-06	0.922469	0.349	0.273	0.161617	CC	Up
g23468	2.63393e-06	-0.38939	0.195	0.299	0.0504028	CC	Down
g23469	5.70859e-47	0.76773	0.822	0.537	1.0924e-42	CC	Up
g23471	2.11983e-11	0.579617	0.658	0.558	4.05651e-07	CC	Up
g23484	3.35187e-05	0.817915	0.623	0.643	0.641413	CC	Up
g23489	3.73736e-05	0.458069	0.331	0.251	0.715182	CC	Up
g2354	5.77177e-16	1.13286	0.25	0.126	1.10449e-11	CC	Up
g23668	1.12538e-21	-1.30507	0.143	0.358	2.15352e-17	CC	Down
g23739	5.14889e-53	-1.65857	0.327	0.648	9.85292e-49	CC	Down
g23740	1.88041e-13	-1.20826	0.121	0.277	3.59834e-09	CC	Down
g23751	2.6666e-55	2.26003	0.27	0.076	5.10282e-51	CC	Up
g23756	7.43006e-12	0.776644	0.412	0.279	1.42182e-07	CC	Up
g23818	6.73125e-21	-1.12894	0.208	0.421	1.28809e-16	CC	Down
g23929	0.00124059	0.778824	0.294	0.245	1	CC	Up
g23932	1.82795e-16	-0.945352	0.219	0.407	3.49796e-12	CC	Down
g23936	1.6098e-05	-0.618455	0.215	0.313	0.308052	CC	Down
g23939	4.47229e-38	-1.58449	0.2	0.504	8.55818e-34	CC	Down
g23950	9.45685e-12	0.812528	0.305	0.183	1.80966e-07	CC	Up
g23972	2.61123e-15	-1.30368	0.088	0.253	4.99685e-11	CC	Down
g23981	8.59171e-23	-1.832	0.094	0.307	1.64411e-18	CC	Down
g23982	9.3724e-12	-0.690214	0.195	0.354	1.7935e-07	CC	Down
g23987	5.29615e-16	-0.868336	0.239	0.424	1.01347e-11	CC	Down
g24049	5.79341e-06	0.534114	0.279	0.194	0.110863	CC	Up
g24052	0.000165894	0.621459	0.364	0.296	1	CC	Up
g24054	0.00911253	0.779863	0.252	0.211	1	CC	Up
g24059	1.09715e-11	-0.381879	0.18	0.344	2.09951e-07	CC	Down	1.27788	1.235e-06	7.6372e-05
g24063	7.33331e-56	-1.6039	0.338	0.672	1.4033e-51	CC	Down
g24066	0.00491481	0.369056	0.645	0.631	1	CC	Up	-1.12411	0.00556306	0.0495349
g24090	1.75291e-160	2.16419	0.877	0.403	3.35438e-156	CC	Up
g24180	3.00068e-09	0.952751	0.287	0.184	5.7421e-05	CC	Up
g24257	0.00537078	0.425515	0.333	0.285	1	CC	Up
g24270	3.46054e-48	2.43252	0.27	0.084	6.6221e-44	CC	Up
g24278	0.000559554	0.701921	0.336	0.282	1	CC	Up
g24291	5.61725e-06	0.711445	0.276	0.195	0.107492	CC	Up
g24298	3.42033e-31	-1.77477	0.16	0.435	6.54514e-27	CC	Down	1.0355	0.000122261	0.00289315
g243	3.4561e-121	1.44649	0.974	0.921	6.6136e-117	CC	Up
g24305	2.54103e-12	1.53129	0.272	0.163	4.86251e-08	CC	Up
g24312	1.05495e-45	-1.23727	0.393	0.691	2.01875e-41	CC	Down
g24316	3.67995e-103	-2.05752	0.555	0.855	7.04195e-99	CC	Down
g2433	4.35422e-27	-1.4176	0.18	0.431	8.33223e-23	CC	Down
g24339	8.82574e-10	1.44871	0.336	0.239	1.68889e-05	CC	Up
g24343	0.000372298	0.710936	0.257	0.199	1	CC	Up
g24348	4.06786e-14	1.0537	0.461	0.333	7.78425e-10	CC	Up	-1.06934	0.000311486	0.00592832
g24349	2.34677e-12	-0.659545	0.298	0.479	4.49078e-08	CC	Down
g24360	8.52103e-16	0.996113	0.329	0.185	1.63058e-11	CC	Up
g24370	1.28154e-73	-1.84441	0.327	0.704	2.45235e-69	CC	Down
g24401	6.11922e-40	-1.60567	0.189	0.508	1.17097e-35	CC	Down	1.31033	3.9009e-07	2.88357e-05
g24431	0.00852491	0.496249	0.309	0.267	1	CC	Up
g24433	6.33111e-38	-1.36228	0.248	0.56	1.21152e-33	CC	Down
g24435	8.15958e-32	1.40237	0.305	0.125	1.56142e-27	CC	Up	-1.48916	0.000511971	0.00865751
g24500	0.00545752	-0.251164	0.292	0.36	1	CC	Down
g24502	0.000481482	0.489776	0.601	0.601	1	CC	Up
g24522	1.46027e-20	1.15981	0.254	0.114	2.79438e-16	CC	Up
g24531	9.60909e-10	0.490822	0.671	0.584	1.8388e-05	CC	Up
g2456	1.69679e-50	-1.47592	0.311	0.649	3.24697e-46	CC	Down	1.10857	1.6632e-05	0.000615319
g24568	0.00217371	0.375126	0.73	0.739	1	CC	Up
g24578	4.08075e-39	1.66536	0.285	0.1	7.80893e-35	CC	Up
g24584	1.56965e-22	-2.84247	0.151	0.362	3.00367e-18	CC	Down
g24592	1.64315e-18	-1.00369	0.224	0.432	3.14433e-14	CC	Down	1.40685	0.000157113	0.0035134
g24595	3.32839e-07	0.856119	0.268	0.179	0.00636921	CC	Up
g24622	3.99727e-61	2.17721	0.357	0.118	7.64917e-57	CC	Up
g24627	2.48011e-38	0.87895	0.787	0.569	4.74594e-34	CC	Up
g24655	7.63075e-28	-1.70762	0.121	0.379	1.46022e-23	CC	Down
g24662	4.67733e-19	1.09768	0.489	0.334	8.95054e-15	CC	Up
g24664	8.32423e-18	-0.898462	0.311	0.518	1.59292e-13	CC	Down	1.8254	8.54432e-07	5.6397e-05
g24665	2.43241e-23	1.29643	0.263	0.115	4.65466e-19	CC	Up
g24671	0.00134829	0.527145	0.555	0.564	1	CC	Up
g24686	5.63417e-06	0.508143	0.559	0.518	0.107815	CC	Up
g24688	3.00694e-09	0.747471	0.331	0.222	5.75408e-05	CC	Up
g24693	3.74476e-06	0.543115	0.491	0.429	0.0716596	CC	Up
g24700	9.19594e-05	0.69599	0.434	0.371	1	CC	Up
g24709	9.69597e-34	1.71281	0.276	0.103	1.85542e-29	CC	Up
g24713	1.58504e-15	-1.04155	0.123	0.301	3.03313e-11	CC	Down
g24714	1.83301e-10	0.731476	0.289	0.175	3.50765e-06	CC	Up
g24736	0.00134274	-0.309687	0.285	0.363	1	CC	Down
g24775	0	4.66997	0.274	0.018	0	CC	Up	-1.29927	0.00329806	0.0339553
g24793	7.77799e-21	-1.18965	0.191	0.416	1.4884e-16	CC	Down
g24806	1.12358e-05	0.750664	0.333	0.258	0.215008	CC	Up
g24812	3.00265e-12	0.620657	0.327	0.197	5.74586e-08	CC	Up
g24869	1.01698e-13	1.00347	0.331	0.202	1.94608e-09	CC	Up
g24871	2.00005e-06	0.582803	0.375	0.286	0.0382729	CC	Up
g2492	6.01209e-08	0.76797	0.408	0.31	0.00115047	CC	Up
g24929	7.93495e-09	0.682044	0.498	0.38	0.000151843	CC	Up
g24949	2.05554e-05	0.701406	0.333	0.255	0.393348	CC	Up
g24960	1.43223e-13	0.87806	0.627	0.543	2.74072e-09	CC	Up
g24963	4.32841e-05	0.699711	0.474	0.43	0.828285	CC	Up
g24977	2.57928e-47	-0.946682	0.882	0.91	4.93571e-43	CC	Down
g24978	1.04415e-10	-0.802225	0.132	0.265	1.99809e-06	CC	Down
g24981	1.20543e-07	1.2153	0.296	0.205	0.00230671	CC	Up
g24994	2.56857e-19	-1.22971	0.182	0.392	4.91521e-15	CC	Down
g25019	4.90287e-12	-1.0281	0.107	0.255	9.38213e-08	CC	Down
g25064	0.00323129	0.439767	0.513	0.483	1	CC	Up
g25070	1.39355e-12	0.729662	0.564	0.438	2.66669e-08	CC	Up
g25076	3.46825e-06	-0.497099	0.2	0.297	0.0663685	CC	Down
g25077	3.03877e-08	-0.607808	0.182	0.306	0.000581499	CC	Down
g25083	0.00473196	0.533514	0.311	0.258	1	CC	Up
g25084	1.43643e-32	1.38853	0.577	0.401	2.74875e-28	CC	Up
g25092	1.46279e-13	-0.964623	0.127	0.287	2.79919e-09	CC	Down
g25134	1.47543e-172	2.82905	0.66	0.197	2.82339e-168	CC	Up
g25135	0	5.03417	0.66	0.051	0	CC	Up
g25155	2.05284e-05	0.39594	0.645	0.608	0.392832	CC	Up
g25157	2.17685e-37	-1.16068	0.471	0.709	4.16562e-33	CC	Down	1.6307	1.15303e-07	1.04668e-05
g25198	9.15981e-08	0.709954	0.436	0.342	0.00175282	CC	Up
g252	8.26958e-58	-1.42233	0.414	0.734	1.58247e-53	CC	Down
g25200	1.49758e-08	0.837523	0.366	0.276	0.000286577	CC	Up
g25248	2.38623e-05	0.72305	0.254	0.184	0.456628	CC	Up
g25257	9.16725e-47	-1.36908	0.331	0.655	1.75425e-42	CC	Down
g25259	3.25233e-10	0.895183	0.325	0.218	6.22366e-06	CC	Up
g25262	3.33152e-05	0.614379	0.311	0.237	0.63752	CC	Up
g25309	3.34114e-29	-1.93072	0.096	0.356	6.3936e-25	CC	Down
g25354	5.18222e-12	1.02207	0.489	0.37	9.9167e-08	CC	Up
g25355	2.39277e-05	-0.271494	0.281	0.373	0.45788	CC	Down
g25360	6.22602e-12	-0.856128	0.283	0.445	1.19141e-07	CC	Down
g25362	5.46964e-06	0.555962	0.458	0.383	0.104667	CC	Up
g25380	1.02439e-44	-1.89725	0.14	0.482	1.96027e-40	CC	Down
g25396	1.83584e-10	-0.486696	0.388	0.539	3.51306e-06	CC	Down
g25417	2.44638e-07	-0.345107	0.285	0.413	0.00468139	CC	Down
g25419	5.66414e-11	0.996854	0.289	0.177	1.08389e-06	CC	Up	1.38952	9.2095e-07	5.97554e-05
g25435	1.13482e-20	0.847502	0.322	0.159	2.17158e-16	CC	Up
g25437	5.62792e-05	0.62127	0.401	0.338	1	CC	Up	-4.67077	1.99183e-05	0.000704813
g25466	3.10462e-24	-1.8278	0.07	0.292	5.941e-20	CC	Down
g25469	1.43246e-46	1.46183	0.583	0.317	2.74115e-42	CC	Up
g25502	6.99509e-43	1.6764	0.311	0.11	1.33858e-38	CC	Up
g25506	1.71903e-17	-0.728462	0.43	0.602	3.28954e-13	CC	Down	1.30644	2.14901e-06	0.000120247
g25507	2.24355e-29	1.13326	0.607	0.423	4.29326e-25	CC	Up
g25520	0.000314346	0.888458	0.257	0.197	1	CC	Up
g25528	2.95329e-10	0.78773	0.333	0.214	5.65141e-06	CC	Up
g25541	3.50678e-30	-1.56953	0.175	0.451	6.71058e-26	CC	Down
g25543	2.17239e-31	1.24229	0.546	0.324	4.15709e-27	CC	Up
g25551	1.25072e-11	1.03758	0.52	0.416	2.39338e-07	CC	Up
g25586	5.71572e-05	0.391816	0.634	0.602	1	CC	Up
g25607	5.60018e-05	0.583675	0.3	0.227	1	CC	Up
g25621	5.58771e-94	2.3601	0.581	0.222	1.06927e-89	CC	Up
g25662	1.00675e-37	1.19037	0.557	0.299	1.92651e-33	CC	Up
g25666	8.70219e-06	0.685442	0.27	0.194	0.166525	CC	Up	-1.23031	7.76079e-06	0.000335135
g25672	7.85035e-26	-1.90829	0.112	0.348	1.50224e-21	CC	Down
g25677	3.93103e-06	-0.455809	0.164	0.258	0.0752243	CC	Down
g25682	0.000299204	0.459124	0.333	0.267	1	CC	Up
g25693	9.78635e-11	-0.758349	0.156	0.296	1.87272e-06	CC	Down
g25698	1.90113e-17	-1.20092	0.121	0.31	3.63801e-13	CC	Down	1.27239	0.000133673	0.00310414
g257	8.4418e-07	0.77048	0.292	0.203	0.0161542	CC	Up
g25701	5.04477e-26	1.35116	0.432	0.24	9.65367e-22	CC	Up
g25727	3.53611e-18	0.661055	0.754	0.665	6.76671e-14	CC	Up
g25738	2.9708e-125	3.47715	0.268	0.041	5.68492e-121	CC	Up
g25760	3.88202e-08	0.793525	0.607	0.548	0.000742862	CC	Up
g25770	8.29411e-18	1.00442	0.346	0.193	1.58716e-13	CC	Up
g25776	4.33166e-22	1.60307	0.268	0.125	8.28906e-18	CC	Up	1.82986	0.00137909	0.0178841
g25789	1.77359e-15	0.441094	0.636	0.458	3.39393e-11	CC	Up
g25817	2.10658e-15	0.660113	0.829	0.862	4.03114e-11	CC	Up
g25818	3.03347e-09	-0.77807	0.171	0.296	5.80485e-05	CC	Down
g25821	0.000127965	0.399286	0.421	0.346	1	CC	Up
g25923	1.12625e-20	1.0426	0.61	0.48	2.1552e-16	CC	Up
g25925	3.56156e-26	1.12158	0.507	0.309	6.81541e-22	CC	Up
g25933	1.10117e-12	0.4926	0.651	0.532	2.1072e-08	CC	Up
g25937	2.47713e-47	1.94228	0.289	0.093	4.74023e-43	CC	Up
g25938	2.76397e-12	-0.704684	0.151	0.313	5.28913e-08	CC	Down
g25942	1.75166e-27	1.49151	0.272	0.113	3.35198e-23	CC	Up
g25943	0.000497961	0.366785	0.384	0.319	1	CC	Up
g25960	1.31026e-44	1.69839	0.259	0.078	2.50731e-40	CC	Up
g25966	4.80798e-06	0.471451	0.686	0.665	0.0920056	CC	Up
g25976	1.86349e-33	-1.34252	0.265	0.54	3.56597e-29	CC	Down
g25984	7.63191e-13	0.478998	0.818	0.778	1.46044e-08	CC	Up
g25992	1.9311e-39	-1.73404	0.156	0.485	3.69534e-35	CC	Down	1.01601	0.000166659	0.00368163
g26017	1.19337e-45	2.51381	0.485	0.241	2.28363e-41	CC	Up
g26021	2.53833e-08	0.641955	0.292	0.189	0.000485735	CC	Up
g26047	3.64923e-05	-0.379279	0.474	0.566	0.698316	CC	Down
g26057	0.00791093	0.50762	0.281	0.238	1	CC	Up
g26079	9.3081e-25	-2.52775	0.064	0.282	1.7812e-20	CC	Down
g26089	4.59335e-08	-0.834906	0.167	0.286	0.000878983	CC	Down
g26126	2.27222e-10	0.894738	0.336	0.219	4.34811e-06	CC	Up
g26136	1.65193e-37	-1.42872	0.208	0.517	3.16113e-33	CC	Down
g26145	1.95061e-59	2.21677	0.362	0.121	3.73269e-55	CC	Up
g26149	0.00821806	0.447078	0.292	0.243	1	CC	Up	-1.23163	3.99559e-16	4.12701e-13
g26152	1.49618e-251	4.7202	0.289	0.026	2.86308e-247	CC	Up
g26162	4.36302e-20	1.12423	0.493	0.327	8.34907e-16	CC	Up
g26182	1.28725e-08	0.652703	0.305	0.205	0.000246327	CC	Up
g26241	1.10926e-56	2.02514	0.412	0.154	2.12269e-52	CC	Up
g2628	2.7902e-32	1.44017	0.399	0.193	5.33932e-28	CC	Up
g26369	2.53715e-14	1.13902	0.289	0.163	4.8551e-10	CC	Up
g26540	0.000137169	0.728089	0.366	0.298	1	CC	Up
g26573	1.17189e-16	1.2917	0.364	0.222	2.24254e-12	CC	Up
g26586	2.20182e-35	2.0132	0.309	0.123	4.2134e-31	CC	Up
g26588	3.62596e-07	0.589998	0.715	0.668	0.00693863	CC	Up
g26616	1.06769e-06	0.724747	0.504	0.423	0.0204313	CC	Up
g26682	6.76951e-07	0.39658	0.531	0.432	0.0129541	CC	Up
g26728	8.73758e-138	4.16157	0.412	0.093	1.67202e-133	CC	Up
g26745	5.84791e-18	0.792308	0.559	0.407	1.11906e-13	CC	Up
g26761	6.47913e-36	-1.41098	0.228	0.531	1.23985e-31	CC	Down
g26774	5.33909e-31	-1.13283	0.32	0.585	1.02169e-26	CC	Down
g26780	1.62792e-19	-1.20967	0.116	0.322	3.1152e-15	CC	Down
g26783	8.38021e-26	-3.02447	0.057	0.276	1.60364e-21	CC	Down
g26804	8.11084e-76	2.83912	0.252	0.055	1.55209e-71	CC	Up
g26849	2.82867e-09	0.963755	0.502	0.428	5.41294e-05	CC	Up
g26941	0.000194356	0.721595	0.254	0.19	1	CC	Up
g26957	7.10542e-21	0.920568	0.467	0.286	1.35969e-16	CC	Up
g26970	5.23441e-15	1.0105	0.25	0.128	1.00166e-10	CC	Up
g26978	2.53579e-34	1.82145	0.272	0.101	4.85248e-30	CC	Up
g26999	4.23438e-20	-0.945375	0.217	0.445	8.10292e-16	CC	Down
g27003	0.00480948	0.700644	0.298	0.254	1	CC	Up
g27011	1.00467e-18	-1.24117	0.116	0.312	1.92254e-14	CC	Down
g27138	6.52375e-05	0.566482	0.368	0.304	1	CC	Up
g27199	3.37818e-32	-1.74474	0.164	0.44	6.46448e-28	CC	Down	1.2918	2.1132e-06	0.000118765
g27206	2.96567e-10	0.62195	0.471	0.344	5.6751e-06	CC	Up
g27227	9.10872e-88	2.00398	0.704	0.367	1.74304e-83	CC	Up
g27321	2.09458e-12	-0.764704	0.211	0.368	4.00818e-08	CC	Down
g274	1.42987e-05	-0.320899	0.169	0.259	0.273621	CC	Down
g27551	8.42098e-15	2.82651	0.375	0.263	1.61144e-10	CC	Up
g27642	1.01488e-11	0.914206	0.285	0.168	1.94208e-07	CC	Up
g27685	6.7358e-06	0.841762	0.368	0.298	0.128896	CC	Up
g280	1.22169e-98	-1.64046	0.877	0.958	2.33783e-94	CC	Down	2.15603	8.1729e-07	5.47012e-05
g28080	8.22888e-10	0.869624	0.452	0.344	1.57468e-05	CC	Up
g28103	1.83001e-06	-0.557465	0.175	0.284	0.035019	CC	Down
g28201	3.88251e-15	1.18004	0.303	0.173	7.42958e-11	CC	Up
g28261	2.41161e-27	-1.21533	0.248	0.509	4.61485e-23	CC	Down	1.09107	5.42579e-10	1.15199e-07
g283	0.00167196	0.520605	0.417	0.36	1	CC	Up
g28345	7.65419e-05	-0.326773	0.283	0.383	1	CC	Down
g28351	4.8207e-22	-2.01081	0.077	0.283	9.2249e-18	CC	Down
g28394	5.55995e-14	0.797956	0.537	0.403	1.06395e-09	CC	Up
g28666	1.96976e-10	1.09697	0.289	0.181	3.76934e-06	CC	Up
g288	1.74784e-54	2.45668	0.281	0.084	3.34466e-50	CC	Up	-2.6549	4.17144e-08	4.44067e-06
g28834	1.92527e-35	0.497061	0.941	0.914	3.68419e-31	CC	Up
g28924	2.74135e-11	0.857204	0.439	0.319	5.24584e-07	CC	Up
g28943	2.5707e-48	1.63337	0.721	0.557	4.9193e-44	CC	Up
g28945	2.97336e-16	-2.00045	0.112	0.279	5.68983e-12	CC	Down
g28993	5.31944e-13	0.776781	0.599	0.505	1.01793e-08	CC	Up
g29017	3.54943e-47	1.80537	0.601	0.379	6.79219e-43	CC	Up
g29023	1.08491e-13	-1.44217	0.189	0.343	2.07608e-09	CC	Down
g29032	1.17891e-09	0.675861	0.425	0.308	2.25597e-05	CC	Up
g29044	1.13131e-37	2.0134	0.309	0.123	2.16487e-33	CC	Up
g29047	0.00232326	-0.325462	0.232	0.3	1	CC	Down
g29049	5.90232e-22	1.23868	0.509	0.359	1.12947e-17	CC	Up
g29076	7.75174e-17	1.2189	0.373	0.227	1.48337e-12	CC	Up
g29087	7.00574e-16	-0.95099	0.149	0.332	1.34062e-11	CC	Down
g29095	6.09484e-05	-0.285591	0.327	0.422	1	CC	Down
g29109	7.61858e-06	0.547682	0.546	0.499	0.145789	CC	Up
g29122	1.53461e-68	2.30297	0.507	0.21	2.93664e-64	CC	Up
g29130	2.46358e-12	0.630006	0.691	0.609	4.71431e-08	CC	Up
g29134	7.04476e-51	-1.78479	0.235	0.584	1.34809e-46	CC	Down
g29151	2.43422e-12	0.865442	0.57	0.466	4.65812e-08	CC	Up
g29152	1.2716e-18	0.748026	0.814	0.799	2.43333e-14	CC	Up
g29159	6.78309e-48	2.23096	0.377	0.15	1.29801e-43	CC	Up
g29197	0.000265989	0.520491	0.568	0.535	1	CC	Up
g29206	0.00176578	-0.389825	0.2	0.261	1	CC	Down
g29212	0.00056935	0.674394	0.504	0.476	1	CC	Up
g29220	9.07145e-125	-1.90032	0.987	0.996	1.73591e-120	CC	Down
g29221	3.52796e-24	1.25683	0.296	0.135	6.75111e-20	CC	Up
g29282	4.12863e-58	1.38978	0.353	0.111	7.90055e-54	CC	Up
g29299	1.25027e-22	-0.80959	0.45	0.64	2.39252e-18	CC	Down
g29332	7.18936e-05	0.924731	0.316	0.254	1	CC	Up
g29334	1.97688e-20	-1.2472	0.121	0.329	3.78296e-16	CC	Down	1.21475	6.02519e-08	6.0596e-06
g29342	4.37282e-24	1.03823	0.307	0.141	8.36783e-20	CC	Up	-1.65839	0.00358195	0.0360526
g29347	2.40696e-213	4.22874	0.285	0.029	4.60597e-209	CC	Up
g29359	4.36589e-19	0.954144	0.654	0.562	8.35456e-15	CC	Up
g29378	3.39392e-12	-0.684549	0.175	0.34	6.49461e-08	CC	Down
g29379	4.33056e-113	-1.93967	0.559	0.857	8.28696e-109	CC	Down
g29404	5.28118e-05	0.53561	0.32	0.242	1	CC	Up
g29422	1.78402e-07	-0.337461	0.145	0.256	0.00341389	CC	Down
g29437	3.71476e-22	0.92357	0.531	0.339	7.10856e-18	CC	Up
g29439	7.11435e-11	0.966166	0.388	0.275	1.3614e-06	CC	Up
g29445	0.00883255	0.43478	0.283	0.239	1	CC	Up
g29447	1.08642e-15	1.13272	0.412	0.266	2.07898e-11	CC	Up
g29483	4.0829e-25	-1.31414	0.178	0.419	7.81303e-21	CC	Down
g29486	8.28323e-08	0.78257	0.305	0.211	0.00158508	CC	Up
g29528	0.000630317	0.3431	0.739	0.768	1	CC	Up
g29532	7.01642e-28	1.92156	0.276	0.119	1.34266e-23	CC	Up
g29555	0.00249108	0.586631	0.298	0.243	1	CC	Up
g29558	5.28484e-113	2.71937	0.294	0.052	1.01131e-108	CC	Up
g29559	4.42805e-22	1.07599	0.524	0.343	8.47351e-18	CC	Up
g29606	0	4.8646	0.27	0.013	0	CC	Up
g29607	5.70033e-09	1.04795	0.404	0.311	0.000109082	CC	Up
g29609	4.81787e-23	1.38379	0.32	0.157	9.21947e-19	CC	Up
g29616	5.44345e-24	-0.937133	0.239	0.487	1.04166e-19	CC	Down
g29659	8.65809e-06	0.74665	0.401	0.334	0.165681	CC	Up
g297	2.73573e-68	-1.71102	0.555	0.807	5.2351e-64	CC	Down	1.86052	3.50264e-06	0.000176364
g29755	5.61534e-21	0.749706	0.39	0.207	1.07455e-16	CC	Up
g29760	4.78716e-194	4.02901	0.386	0.059	9.16072e-190	CC	Up
g29767	9.78171e-06	0.548661	0.522	0.462	0.187183	CC	Up
g29769	0.000904641	0.506676	0.401	0.346	1	CC	Up
g29779	4.88534e-17	1.17226	0.482	0.341	9.34858e-13	CC	Up
g29785	6.55825e-27	1.43448	0.439	0.246	1.25499e-22	CC	Up
g29786	3.62717e-24	1.50358	0.261	0.113	6.94095e-20	CC	Up
g29793	6.46147e-19	0.617822	0.294	0.145	1.23647e-14	CC	Up	-2.16182	4.97382e-06	0.000237309
g29833	9.46524e-57	1.16281	0.789	0.494	1.81127e-52	CC	Up
g29834	5.98198e-71	-1.70383	0.395	0.73	1.14471e-66	CC	Down
g29841	2.54952e-141	2.71392	0.643	0.207	4.87875e-137	CC	Up
g29842	3.44199e-13	-1.69552	0.114	0.259	6.5866e-09	CC	Down
g29859	1.61484e-05	-0.334394	0.346	0.458	0.309017	CC	Down
g29890	2.89507e-13	-1.29992	0.129	0.277	5.54e-09	CC	Down
g29901	0.000124866	0.778985	0.325	0.262	1	CC	Up
g29906	4.39667e-25	-0.799705	0.502	0.695	8.41347e-21	CC	Down
g29907	4.72739e-08	-0.788551	0.167	0.276	0.000904633	CC	Down
g29911	3.01191e-06	0.692374	0.594	0.55	0.057636	CC	Up
g29965	1.87108e-98	-1.68726	0.748	0.905	3.5805e-94	CC	Down	1.08119	5.33473e-09	8.16862e-07
g29968	1.8196e-21	-0.834207	0.371	0.597	3.48199e-17	CC	Down
g29978	0.00151483	0.338944	0.272	0.212	1	CC	Up
g29998	1.68962e-31	2.1537	0.349	0.167	3.23325e-27	CC	Up
g30000	1.90255e-15	-0.53048	0.491	0.684	3.64072e-11	CC	Down
g30051	5.89262e-74	2.85934	0.581	0.261	1.12761e-69	CC	Up
g30057	7.99696e-139	2.97056	0.298	0.046	1.5303e-134	CC	Up
g30074	6.31557e-21	1.37616	0.316	0.161	1.20855e-16	CC	Up
g30082	6.22976e-09	-0.6062	0.261	0.395	0.000119213	CC	Down
g30101	0.00119583	0.556882	0.43	0.385	1	CC	Up
g30104	7.00219e-29	0.704013	0.877	0.801	1.33994e-24	CC	Up
g30105	3.15861e-14	1.01723	0.432	0.288	6.04431e-10	CC	Up
g30109	3.08914e-05	0.695381	0.289	0.217	0.591138	CC	Up
g30111	8.18106e-06	0.550866	0.366	0.28	0.156553	CC	Up
g30122	1.53486e-13	0.851184	0.673	0.584	2.93711e-09	CC	Up
g30123	6.51702e-12	-0.745065	0.27	0.431	1.2471e-07	CC	Down
g30138	0.000103417	0.50626	0.682	0.64	1	CC	Up
g30139	4.17949e-05	0.399273	0.25	0.174	0.799786	CC	Up	1.93653	1.80681e-05	0.000654511
g30153	7.513e-25	-1.35661	0.162	0.412	1.43769e-20	CC	Down
g30155	5.51692e-34	-1.25119	0.318	0.59	1.05572e-29	CC	Down
g30161	9.57752e-111	-1.92172	0.667	0.898	1.83275e-106	CC	Down	1.07315	3.18477e-06	0.000164476
g30167	8.2464e-30	1.89981	0.346	0.167	1.57803e-25	CC	Up
g30169	2.35972e-08	0.527032	0.717	0.723	0.000451556	CC	Up
g30196	0.000106058	0.585172	0.338	0.27	1	CC	Up
g30200	0	4.87468	0.276	0.013	0	CC	Up
g30211	9.254e-24	1.23599	0.395	0.219	1.77084e-19	CC	Up
g30317	1.03702e-23	-1.87393	0.048	0.259	1.98444e-19	CC	Down
g30333	7.84752e-15	0.634725	0.498	0.332	1.5017e-10	CC	Up
g30398	6.26937e-07	0.544095	0.561	0.488	0.0119971	CC	Up	2.18743	3.5664e-06	0.000179338
g30417	2.45616e-24	-1.74376	0.086	0.309	4.7001e-20	CC	Down	1.48765	4.39657e-14	2.58853e-11
g30448	1.34077e-14	0.930068	0.434	0.289	2.56569e-10	CC	Up
g30455	7.65368e-07	0.422528	0.555	0.474	0.0146461	CC	Up
g30459	2.07141e-12	1.01948	0.292	0.172	3.96385e-08	CC	Up
g3046	2.52119e-06	0.931915	0.336	0.258	0.0482455	CC	Up
g30460	5.23813e-20	1.19132	0.254	0.116	1.00237e-15	CC	Up
g30487	3.20846e-07	-0.629388	0.671	0.772	0.00613971	CC	Down	-1.07883	2.26872e-06	0.000125516
g30530	7.91649e-26	0.69127	0.871	0.81	1.5149e-21	CC	Up
g30533	0.000316847	0.426613	0.296	0.228	1	CC	Up
g30535	1.72004e-12	0.480173	0.586	0.428	3.29147e-08	CC	Up	-2.24035	4.80389e-05	0.00141115
g30547	3.88506e-69	2.02897	0.579	0.285	7.43445e-65	CC	Up
g30550	2.6019e-19	-0.830161	0.379	0.58	4.97899e-15	CC	Down
g30557	1.41561e-05	-0.680518	0.186	0.279	0.270891	CC	Down
g30560	7.93307e-15	1.00845	0.279	0.151	1.51807e-10	CC	Up
g30581	2.81475e-29	1.02674	0.515	0.292	5.3863e-25	CC	Up
g30585	1.014e-10	-1.00469	0.16	0.297	1.9404e-06	CC	Down
g30603	3.69035e-10	0.886032	0.397	0.28	7.06185e-06	CC	Up
g30618	8.93515e-18	1.06953	0.353	0.202	1.70983e-13	CC	Up
g30636	0	5.02967	0.276	0.012	0	CC	Up
g30658	1.5142e-09	0.559532	0.3	0.187	2.89758e-05	CC	Up
g30665	9.74202e-05	0.963125	0.261	0.199	1	CC	Up
g30695	1.55384e-24	-0.982184	0.248	0.497	2.97342e-20	CC	Down
g30777	6.70334e-09	0.721685	0.346	0.235	0.000128275	CC	Up
g30780	4.48462e-07	-0.355182	0.204	0.322	0.00858178	CC	Down
g30787	0.00348751	1.06754	0.263	0.224	1	CC	Up	1.01844	0.00266679	0.029169
g30791	1.83267e-28	1.28199	0.362	0.169	3.507e-24	CC	Up
g30799	5.33324e-09	0.813896	0.362	0.256	0.000102057	CC	Up
g30808	3.64039e-22	0.876746	0.774	0.713	6.96626e-18	CC	Up
g30833	3.14549e-18	1.05979	0.289	0.147	6.01921e-14	CC	Up
g30850	1.08005e-53	-1.18892	0.555	0.791	2.06679e-49	CC	Down	1.55613	1.67108e-07	1.42811e-05
g30857	2.51483e-10	-2.12163	0.149	0.262	4.81238e-06	CC	Down
g30906	4.88919e-07	0.699062	0.353	0.266	0.00935595	CC	Up
g30909	3.29455e-06	0.608083	0.491	0.421	0.0630445	CC	Up
g30920	0.00167228	0.635359	0.695	0.728	1	CC	Up	1.78253	4.8142e-08	5.01319e-06
g30929	8.55696e-26	-0.839184	0.34	0.595	1.63746e-21	CC	Down
g30935	1.38598e-10	1.16712	0.303	0.198	2.65222e-06	CC	Up
g30955	0.000653665	0.596453	0.279	0.22	1	CC	Up
g30963	3.87847e-10	1.01669	0.276	0.17	7.42185e-06	CC	Up
g30995	8.45053e-26	-1.10793	0.32	0.555	1.61709e-21	CC	Down	1.21397	5.40579e-07	3.8258e-05
g31	2.45967e-06	0.618613	0.336	0.25	0.0470683	CC	Up
g31021	0.000105538	-0.362049	0.327	0.424	1	CC	Down
g31025	1.23655e-06	0.731305	0.489	0.428	0.0236626	CC	Up
g31030	4.12481e-14	-0.907027	0.246	0.42	7.89323e-10	CC	Down
g31036	0.00871855	0.594983	0.27	0.227	1	CC	Up
g31073	6.85078e-36	1.18061	0.406	0.181	1.31097e-31	CC	Up
g31079	1.85725e-20	0.815948	0.32	0.158	3.55403e-16	CC	Up
g31102	6.99369e-05	0.814104	0.298	0.231	1	CC	Up
g31104	3.68262e-38	-1.38714	0.274	0.583	7.04706e-34	CC	Down	1.06745	0.000112729	0.00272812
g31138	1.62465e-08	0.574126	0.669	0.647	0.000310893	CC	Up	1.73977	3.54276e-05	0.0011116
g31148	2.85748e-18	-1.40623	0.134	0.33	5.46807e-14	CC	Down
g31164	3.61253e-07	-0.730927	0.145	0.25	0.00691294	CC	Down
g31166	9.22023e-08	0.740835	0.384	0.294	0.00176438	CC	Up
g31185	4.49189e-30	-1.99161	0.079	0.338	8.59569e-26	CC	Down	1.30306	7.46797e-08	7.29932e-06
g31186	4.29398e-17	0.570415	0.811	0.745	8.21696e-13	CC	Up	1.27527	2.38887e-05	0.000815866
g31187	2.85739e-09	-0.432888	0.401	0.538	5.46789e-05	CC	Down
g31188	3.0238e-11	-0.514593	0.285	0.459	5.78634e-07	CC	Down
g31189	5.58123e-51	-1.71283	0.322	0.635	1.06802e-46	CC	Down
g31194	1.23928e-20	-1.51089	0.077	0.279	2.37148e-16	CC	Down	1.2514	1.27724e-08	1.65465e-06
g31252	6.91195e-10	-1.05711	0.134	0.258	1.32267e-05	CC	Down
g31262	0.00774053	0.505753	0.283	0.233	1	CC	Up
g31268	1.18419e-09	0.870269	0.279	0.178	2.26606e-05	CC	Up
g31279	1.68128e-14	0.690468	0.724	0.647	3.21729e-10	CC	Up
g31281	7.0372e-09	1.55889	0.265	0.173	0.000134664	CC	Up
g31325	1.30282e-15	1.0031	0.252	0.128	2.49307e-11	CC	Up
g31326	1.47614e-19	1.29614	0.414	0.253	2.82474e-15	CC	Up
g31345	4.82262e-30	-1.58779	0.171	0.438	9.22856e-26	CC	Down	2.18271	1.56649e-14	1.00234e-11
g31361	9.07519e-26	0.529096	0.822	0.684	1.73663e-21	CC	Up
g31379	1.8084e-07	0.428952	0.546	0.438	0.00346056	CC	Up
g31380	0	4.61934	0.344	0.025	0	CC	Up
g31384	6.96631e-18	-1.00664	0.221	0.421	1.33307e-13	CC	Down
g31396	9.30253e-55	-1.32325	0.529	0.771	1.78013e-50	CC	Down
g31397	9.07752e-100	-1.48654	0.809	0.931	1.73707e-95	CC	Down
g31405	1.13793e-24	1.01947	0.741	0.664	2.17754e-20	CC	Up
g31435	0.00186932	0.421108	0.577	0.536	1	CC	Up
g31464	0.00026412	0.837861	0.327	0.27	1	CC	Up
g31465	7.67351e-15	1.14364	0.434	0.299	1.4684e-10	CC	Up
g31496	1.45518e-18	-1.2439	0.162	0.363	2.78464e-14	CC	Down
g31515	2.29944e-12	1.0826	0.3	0.179	4.40021e-08	CC	Up
g31521	1.78484e-18	-1.32313	0.107	0.303	3.41546e-14	CC	Down
g31558	2.68038e-05	0.617498	0.34	0.265	0.512918	CC	Up
g31560	6.1993e-05	0.631005	0.379	0.308	1	CC	Up
g31592	5.45704e-54	-1.50222	0.342	0.676	1.04426e-49	CC	Down	1.27214	1.07946e-08	1.42747e-06
g31610	7.64519e-53	1.77661	0.634	0.378	1.46298e-48	CC	Up
g31626	9.00466e-38	0.959006	0.678	0.415	1.72313e-33	CC	Up
g3164	1.48707e-18	-1.82891	0.11	0.301	2.84565e-14	CC	Down
g31659	2.56401e-07	-0.375829	0.219	0.339	0.00490648	CC	Down
g31704	3.1085e-22	1.30103	0.496	0.312	5.94842e-18	CC	Up
g31708	9.05094e-14	0.915168	0.404	0.268	1.73199e-09	CC	Up
g31734	0.00585224	0.468766	0.353	0.306	1	CC	Up
g31823	2.73432e-25	-0.854243	0.537	0.694	5.23239e-21	CC	Down
g31856	4.13308e-10	-0.561555	0.191	0.332	7.90907e-06	CC	Down
g32000	5.65788e-20	0.92793	0.526	0.342	1.08269e-15	CC	Up
g32007	0.000454314	0.672399	0.296	0.238	1	CC	Up
g32017	2.75409e-23	-1.60156	0.143	0.37	5.27023e-19	CC	Down
g32037	0.0013902	0.658898	0.414	0.38	1	CC	Up
g32103	0.00111048	0.509687	0.268	0.209	1	CC	Up
g32106	1.67005e-74	-1.4215	0.561	0.81	3.19581e-70	CC	Down
g32176	3.89863e-38	-1.34649	0.224	0.536	7.46042e-34	CC	Down
g3220	4.48483e-07	-0.41036	0.388	0.51	0.00858216	CC	Down
g32551	4.44142e-91	-1.83188	0.482	0.803	8.49911e-87	CC	Down	1.09129	2.95339e-07	2.28945e-05
g32564	7.94793e-11	-0.858599	0.136	0.277	1.52091e-06	CC	Down
g32643	0.000847412	0.566129	0.564	0.535	1	CC	Up
g32733	1.10677e-06	0.804811	0.296	0.214	0.0211791	CC	Up
g3292	0.000545784	0.466379	0.64	0.622	1	CC	Up
g32950	2.15652e-09	-0.654189	0.202	0.338	4.12672e-05	CC	Down
g3299	0.00507785	0.422709	0.792	0.785	1	CC	Up
g3303	2.59072e-14	0.924314	0.276	0.151	4.9576e-10	CC	Up
g33083	2.1405e-07	-0.561471	0.2	0.321	0.00409606	CC	Down
g331	1.8607e-05	0.388526	0.535	0.454	0.356064	CC	Up
g332	1.53699e-22	-1.61358	0.101	0.321	2.94119e-18	CC	Down
g33235	4.93377e-32	-1.85595	0.127	0.402	9.44125e-28	CC	Down
g33244	1.28519e-06	0.55497	0.384	0.292	0.0245934	CC	Up
g33257	0.00893649	0.649342	0.368	0.35	1	CC	Up
g33277	6.20493e-08	1.01552	0.265	0.174	0.00118737	CC	Up
g333	4.01092e-70	-1.63705	0.511	0.792	7.6753e-66	CC	Down	1.24569	1.07413e-05	0.000436523
g3334	3.75233e-05	0.621129	0.366	0.29	0.718046	CC	Up
g33343	2.47817e-12	0.821778	0.342	0.214	4.74223e-08	CC	Up
g33369	8.76297e-09	0.929911	0.254	0.16	0.000167688	CC	Up
g33402	1.09865e-26	-1.54362	0.11	0.359	2.10238e-22	CC	Down
g33458	2.93874e-25	-1.40959	0.129	0.364	5.62356e-21	CC	Down
g33466	5.80796e-17	1.17437	0.436	0.29	1.11141e-12	CC	Up
g33489	2.89416e-63	-1.49996	0.421	0.738	5.53826e-59	CC	Down
g33490	8.47035e-11	-0.680071	0.3	0.444	1.62089e-06	CC	Down
g33560	0.000160921	0.411657	0.553	0.515	1	CC	Up
g33567	2.70843e-49	-1.69223	0.274	0.608	5.18285e-45	CC	Down
g33573	3.01931e-41	-1.32816	0.305	0.616	5.77775e-37	CC	Down
g33582	1.3461e-24	-1.1413	0.175	0.428	2.57589e-20	CC	Down
g33592	9.58714e-21	0.92651	0.417	0.241	1.83459e-16	CC	Up
g33595	3.09e-07	0.378942	0.928	0.911	0.00591303	CC	Up
g33695	2.27562e-05	0.694514	0.265	0.192	0.435462	CC	Up
g337	5.73297e-83	2.48431	0.469	0.162	1.09706e-78	CC	Up
g33778	8.32163e-25	1.15121	0.342	0.165	1.59243e-20	CC	Up
g33780	6.42527e-19	-1.48616	0.136	0.334	1.22954e-14	CC	Down
g33843	4.31103e-37	0.998094	0.774	0.605	8.24958e-33	CC	Up
g33849	1.77696e-06	-0.528198	0.169	0.268	0.0340039	CC	Down
g33863	3.1504e-06	0.451308	0.779	0.759	0.060286	CC	Up
g33871	2.99848e-80	2.47427	0.351	0.095	5.7379e-76	CC	Up
g33877	9.9149e-19	-1.08904	0.158	0.358	1.89732e-14	CC	Down
g33880	1.93973e-47	-1.3052	0.32	0.662	3.71187e-43	CC	Down	1.1219	2.08965e-06	0.000117614
g33898	4.07221e-22	-0.71761	0.529	0.708	7.79259e-18	CC	Down
g339	5.51807e-09	-0.860823	0.136	0.255	0.000105594	CC	Down
g33901	1.14135e-40	-2.20348	0.094	0.414	2.18408e-36	CC	Down
g33945	9.90631e-05	-0.522257	0.186	0.266	1	CC	Down
g33984	7.76582e-17	0.605026	0.862	0.838	1.48607e-12	CC	Up
g33985	0.00154181	0.380213	0.599	0.572	1	CC	Up
g34007	4.05514e-09	-0.427513	0.452	0.583	7.75992e-05	CC	Down
g34017	1.7625e-20	-3.30281	0.105	0.29	3.37272e-16	CC	Down	1.93712	1.04593e-05	0.000427512
g34019	3.51371e-19	-0.94123	0.309	0.511	6.72384e-15	CC	Down
g34023	0.000334247	-0.376589	0.32	0.402	1	CC	Down
g34035	0.000194326	0.613146	0.36	0.294	1	CC	Up
g34036	7.06365e-11	0.58841	0.785	0.794	1.3517e-06	CC	Up
g34037	4.01794e-20	-1.96543	0.077	0.27	7.68872e-16	CC	Down
g34058	2.60883e-05	0.736691	0.254	0.182	0.499225	CC	Up
g34062	6.32568e-20	1.05193	0.325	0.167	1.21048e-15	CC	Up
g34065	0.000155923	0.525315	0.294	0.228	1	CC	Up
g34073	2.45622e-19	1.17169	0.75	0.667	4.70022e-15	CC	Up
g34084	7.93832e-24	-1.57123	0.123	0.355	1.51908e-19	CC	Down
g34092	3.19692e-16	-2.09247	0.123	0.289	6.11763e-12	CC	Down
g34101	7.56109e-08	-0.824864	0.325	0.434	0.00144689	CC	Down
g34127	2.30909e-102	2.19166	0.702	0.326	4.41867e-98	CC	Up	4.48774	0.00111943	0.0153724
g34134	0.00544836	0.748592	0.285	0.247	1	CC	Up
g34136	0.000555581	0.345838	0.831	0.784	1	CC	Up
g34139	1.60179e-37	-1.82952	0.167	0.477	3.06518e-33	CC	Down
g34152	3.95778e-23	1.12321	0.393	0.21	7.57361e-19	CC	Up
g3416	4.65143e-80	2.31475	0.294	0.068	8.90098e-76	CC	Up
g34162	0.000446733	-0.416138	0.279	0.353	1	CC	Down
g34164	0.000149382	0.80238	0.252	0.188	1	CC	Up
g3417	2.01923e-09	0.93046	0.257	0.156	3.864e-05	CC	Up
g34175	1.06672e-47	1.89881	0.555	0.3	2.04127e-43	CC	Up
g34183	5.34133e-12	0.40867	0.73	0.649	1.02212e-07	CC	Up
g34185	3.89203e-39	-2.41907	0.092	0.399	7.44778e-35	CC	Down	3.01806	5.32353e-11	1.50703e-08
g34205	2.07151e-08	-0.610936	0.186	0.308	0.000396404	CC	Down
g34206	1.68268e-62	-1.85133	0.27	0.642	3.21998e-58	CC	Down
g34209	1.80654e-16	-1.0813	0.195	0.378	3.45699e-12	CC	Down	1.11511	1.01872e-07	9.58924e-06
g34214	0	5.48431	0.307	0.023	0	CC	Up
g34217	0.0067164	0.286276	0.423	0.365	1	CC	Up
g34218	1.06372e-20	1.06854	0.395	0.228	2.03553e-16	CC	Up
g34243	3.42929e-20	0.742969	0.557	0.372	6.56229e-16	CC	Up
g34255	0.00177632	0.616944	0.471	0.448	1	CC	Up
g34266	2.77537e-06	-0.471083	0.263	0.37	0.0531094	CC	Down
g34275	5.5688e-23	0.986974	0.342	0.168	1.06565e-18	CC	Up
g34283	1.06249e-102	-1.67797	0.763	0.927	2.03318e-98	CC	Down	1.84731	1.15679e-08	1.5192e-06
g34303	1.22184e-12	0.823649	0.325	0.194	2.33811e-08	CC	Up
g34320	3.49237e-12	-0.64748	0.298	0.459	6.683e-08	CC	Down
g34336	1.34887e-08	1.04405	0.283	0.189	0.00025812	CC	Up
g34340	9.20534e-22	0.778083	0.739	0.601	1.76153e-17	CC	Up
g34342	3.5898e-18	1.56944	0.292	0.155	6.86944e-14	CC	Up
g3436	7.50914e-07	0.355616	0.447	0.342	0.0143695	CC	Up	-1.16441	3.47509e-06	0.000176137
g34378	0	7.39986	0.289	0.006	0	CC	Up
g34404	1.23331e-36	2.33768	0.344	0.153	2.36006e-32	CC	Up
g34407	1.43329e-36	-1.23945	0.309	0.607	2.74273e-32	CC	Down
g34409	3.59266e-11	-0.533721	0.182	0.341	6.87491e-07	CC	Down
g34413	5.01469e-08	1.04044	0.257	0.168	0.00095961	CC	Up
g34431	9.90001e-05	-0.523713	0.224	0.303	1	CC	Down
g34439	1.52024e-15	1.00349	0.333	0.19	2.90914e-11	CC	Up
g34447	6.25556e-27	-1.20627	0.164	0.422	1.19706e-22	CC	Down
g34448	1.01558e-21	-0.958881	0.23	0.468	1.94341e-17	CC	Down
g34449	2.05416e-85	-1.5252	0.59	0.843	3.93085e-81	CC	Down	1.09383	4.72742e-09	7.34422e-07
g34477	5.9676e-18	-1.62796	0.088	0.268	1.14196e-13	CC	Down
g34481	1.97259e-12	0.596381	0.419	0.271	3.77475e-08	CC	Up
g34483	5.4924e-12	1.01711	0.272	0.158	1.05103e-07	CC	Up
g34484	1.66611e-07	0.686615	0.404	0.315	0.00318826	CC	Up
g34488	1.707e-15	0.596867	0.882	0.889	3.26652e-11	CC	Up
g34520	9.95238e-65	1.17476	0.936	0.821	1.90449e-60	CC	Up
g34533	3.45334e-21	-1.13239	0.178	0.402	6.6083e-17	CC	Down	3.236	0.0025073	0.02792
g34539	2.30492e-15	-0.490483	0.636	0.791	4.4107e-11	CC	Down
g3454	9.77351e-13	0.505243	0.746	0.699	1.87026e-08	CC	Up
g34543	8.7481e-32	1.17231	0.625	0.431	1.67404e-27	CC	Up
g34549	4.90895e-47	-1.05196	0.577	0.789	9.39376e-43	CC	Down
g34565	0.0002627	0.61793	0.36	0.301	1	CC	Up
g34567	2.4888e-10	0.660901	0.64	0.594	4.76256e-06	CC	Up
g34582	1.59029e-25	1.43817	0.357	0.182	3.04318e-21	CC	Up
g34592	2.46503e-155	2.83931	0.428	0.083	4.71708e-151	CC	Up
g34690	0.000107017	0.721729	0.279	0.211	1	CC	Up
g34697	2.44575e-24	1.10606	0.496	0.305	4.68018e-20	CC	Up
g34703	3.77834e-07	0.402684	0.276	0.179	0.00723022	CC	Up
g34707	4.9519e-192	3.84429	0.366	0.053	9.47596e-188	CC	Up
g34714	0.00407696	0.375399	0.349	0.284	1	CC	Up
g3472	0.00159435	-0.49848	0.206	0.27	1	CC	Down
g34722	0.000969471	0.450482	0.491	0.446	1	CC	Up
g34726	0.00109488	0.571115	0.34	0.278	1	CC	Up
g34739	3.15998e-98	-1.79191	0.866	0.958	6.04693e-94	CC	Down	2.53371	2.15115e-08	2.52956e-06
g34745	2.75512e-14	-1.36066	0.134	0.296	5.2722e-10	CC	Down	1.43546	2.73923e-05	0.000911097
g34764	5.20152e-08	-0.646168	0.263	0.382	0.000995363	CC	Down
g34766	9.84196e-13	0.787831	0.465	0.325	1.88336e-08	CC	Up	3.73851	0.00289422	0.0309663
g34782	4.23902e-10	-0.993847	0.147	0.276	8.1118e-06	CC	Down
g34802	0.00316767	0.288114	0.498	0.446	1	CC	Up
g34901	8.54673e-05	-0.441106	0.193	0.27	1	CC	Down
g34932	1.54507e-09	0.991915	0.309	0.204	2.95665e-05	CC	Up
g34945	0.00157634	0.693092	0.351	0.308	1	CC	Up
g34949	0.000141572	0.811252	0.338	0.284	1	CC	Up	1.88494	1.75016e-07	1.47651e-05
g34955	1.44903e-79	2.30643	0.344	0.091	2.77287e-75	CC	Up
g34961	1.03176e-15	1.0339	0.296	0.159	1.97438e-11	CC	Up
g34970	0.000279108	0.516158	0.289	0.219	1	CC	Up
g34972	2.17305e-14	0.893499	0.338	0.2	4.15835e-10	CC	Up
g34977	0.0032251	-0.269727	0.226	0.289	1	CC	Down
g34998	2.72814e-49	1.6131	0.316	0.103	5.22057e-45	CC	Up	1.04418	0.000240983	0.00491445
g34999	6.93415e-10	-1.76896	0.151	0.273	1.32692e-05	CC	Down
g35003	0.000257128	0.676674	0.307	0.244	1	CC	Up
g35004	4.66844e-25	-1.39381	0.221	0.455	8.93353e-21	CC	Down	1.44906	2.21959e-06	0.000123473
g35016	1.29556e-54	-1.58791	0.36	0.683	2.47917e-50	CC	Down	1.21832	1.65909e-05	0.000614396
g35021	8.29031e-28	-0.956119	0.382	0.627	1.58643e-23	CC	Down
g35022	1.17442e-89	3.31169	0.276	0.058	2.24737e-85	CC	Up	1.12436	0.00211448	0.0246369
g35037	2.82434e-19	-1.0226	0.127	0.329	5.40466e-15	CC	Down
g35067	0.0078168	0.425373	0.434	0.403	1	CC	Up
g35072	3.09547e-34	0.746803	0.912	0.931	5.9235e-30	CC	Up
g35073	7.20406e-21	-1.32279	0.125	0.342	1.37857e-16	CC	Down
g35081	4.73917e-08	0.567176	0.48	0.388	0.000906887	CC	Up
g35093	2.33799e-12	0.406453	0.265	0.143	4.47398e-08	CC	Up
g351	6.37534e-23	1.04977	0.55	0.394	1.21998e-18	CC	Up
g35117	6.9202e-10	1.02836	0.263	0.163	1.32425e-05	CC	Up
g35135	0.00344231	0.445062	0.397	0.359	1	CC	Up	1.14851	0.00181048	0.0219375
g35140	1.74088e-25	-0.699271	0.511	0.737	3.33136e-21	CC	Down
g35148	2.39449e-41	1.09654	0.822	0.723	4.58209e-37	CC	Up
g3517	1.81718e-08	0.479813	0.393	0.28	0.000347736	CC	Up
g35192	0.00547814	-0.279751	0.458	0.519	1	CC	Down
g35202	2.89751e-66	3.04615	0.259	0.064	5.54467e-62	CC	Up	-1.16758	0.000419414	0.00746913
g35206	0.00049639	-0.351228	0.329	0.417	1	CC	Down
g35208	1.39914e-18	0.718077	0.476	0.294	2.67739e-14	CC	Up
g35220	5.34016e-05	0.699814	0.327	0.252	1	CC	Up
g35236	6.25098e-12	-0.987584	0.145	0.285	1.19619e-07	CC	Down
g35255	0.00286277	0.395681	0.654	0.648	1	CC	Up
g35279	3.72844e-14	-0.871985	0.336	0.515	7.13474e-10	CC	Down	2.07045	2.29542e-11	7.24994e-09
g35290	1.27823e-28	-1.43036	0.195	0.456	2.44601e-24	CC	Down
g35291	9.55125e-38	1.49222	0.287	0.103	1.82773e-33	CC	Up
g35310	1.71707e-16	1.1519	0.445	0.3	3.28579e-12	CC	Up
g35314	1.48403e-06	-0.255532	0.434	0.569	0.0283983	CC	Down
g35324	0.000129448	0.590511	0.342	0.269	1	CC	Up
g35355	4.04482e-67	-1.43551	0.421	0.781	7.74017e-63	CC	Down	1.06385	1.31944e-06	8.05509e-05
g35357	1.35322e-22	1.2856	0.283	0.132	2.58951e-18	CC	Up
g35362	1.70986e-48	-1.31657	0.421	0.695	3.27199e-44	CC	Down
g35437	0.000148005	-0.372005	0.217	0.298	1	CC	Down
g35438	1.93913e-09	0.750519	0.379	0.271	3.71072e-05	CC	Up
g35468	6.61956e-16	0.660063	0.783	0.696	1.26672e-11	CC	Up
g35477	5.32486e-08	-0.391493	0.287	0.421	0.00101897	CC	Down	1.07515	4.74224e-05	0.00139626
g35485	4.86778e-06	-0.343456	0.432	0.541	0.0931498	CC	Down
g35596	1.9991e-07	0.872551	0.399	0.311	0.00382549	CC	Up
g35606	0.00011474	0.657625	0.318	0.252	1	CC	Up
g35612	1.71485e-05	0.606896	0.305	0.225	0.328153	CC	Up
g35622	0.00222083	0.534358	0.268	0.211	1	CC	Up
g3567	2.12125e-10	1.11542	0.331	0.221	4.05922e-06	CC	Up
g35680	7.21498e-05	0.494097	0.338	0.264	1	CC	Up
g357	5.52885e-12	-0.819877	0.224	0.388	1.058e-07	CC	Down
g35727	5.08874e-05	0.387003	0.605	0.554	0.973781	CC	Up
g35736	1.92382e-07	-0.425672	0.395	0.519	0.00368142	CC	Down
g35826	1.74415e-24	0.950938	0.434	0.235	3.33761e-20	CC	Up
g360	1.67796e-30	0.856648	0.276	0.106	3.21094e-26	CC	Up
g36102	1.38949e-15	-1.07175	0.204	0.383	2.65892e-11	CC	Down
g36358	1.31804e-28	-1.60029	0.123	0.381	2.5222e-24	CC	Down
g36364	1.04105e-49	-1.70608	0.232	0.59	1.99215e-45	CC	Down
g36554	9.39535e-23	-1.10255	0.248	0.484	1.79789e-18	CC	Down
g3669	3.94677e-64	2.65819	0.298	0.082	7.55253e-60	CC	Up	-1.26191	3.50543e-05	0.0011017
g3683	4.53952e-26	1.28724	0.52	0.344	8.68683e-22	CC	Up
g3685	0.000167345	0.430086	0.502	0.435	1	CC	Up
g36877	1.71267e-20	0.965512	0.395	0.224	3.27736e-16	CC	Up
g3692	1.09723e-06	-0.658286	0.208	0.303	0.0209965	CC	Down
g3702	1.35425e-39	2.11013	0.296	0.111	2.5915e-35	CC	Up
g37036	0	5.70473	0.371	0.011	0	CC	Up
g37088	7.7437e-114	4.22194	0.276	0.048	1.48184e-109	CC	Up
g37095	7.01299e-19	1.48716	0.279	0.14	1.34201e-14	CC	Up
g37181	9.07445e-14	0.600189	0.252	0.129	1.73649e-09	CC	Up
g372	3.13821e-15	0.654872	0.259	0.132	6.00528e-11	CC	Up	-1.40543	0.00341114	0.0348547
g37207	2.39924e-14	0.707141	0.634	0.515	4.59119e-10	CC	Up
g37262	1.97463e-15	-1.00465	0.169	0.354	3.77864e-11	CC	Down	1.08124	2.75195e-05	0.000913494
g373	0.000667429	0.53943	0.404	0.341	1	CC	Up
g37366	4.49151e-20	1.66111	0.316	0.17	8.59496e-16	CC	Up	1.6064	0.00161749	0.0202276
g37368	3.3522e-06	0.664346	0.509	0.424	0.0641477	CC	Up
g37389	1.31665e-99	-1.6297	0.871	0.959	2.51955e-95	CC	Down	1.94249	7.62833e-06	0.000331286
g37391	2.71456e-63	-1.58726	0.404	0.741	5.19458e-59	CC	Down
g37393	3.1589e-86	-1.77094	0.594	0.841	6.04486e-82	CC	Down	2.12087	9.00484e-07	5.86265e-05
g37395	5.50981e-103	-1.58977	0.985	0.99	1.05436e-98	CC	Down	1.6835	3.9218e-06	0.000193643
g37396	4.88495e-103	-1.6124	0.982	0.984	9.34784e-99	CC	Down	1.5221	2.88049e-06	0.000152049
g37416	5.17517e-05	0.389235	0.384	0.305	0.990321	CC	Up
g37631	6.66803e-06	0.482514	0.546	0.48	0.127599	CC	Up
g37633	1.36164e-22	0.751592	0.421	0.225	2.60563e-18	CC	Up
g37657	3.95386e-07	-0.522621	0.292	0.41	0.0075661	CC	Down
g37880	9.78819e-23	-2.0247	0.059	0.265	1.87307e-18	CC	Down
g37895	9.70047e-25	-0.804517	0.279	0.546	1.85628e-20	CC	Down
g379	1.21412e-23	1.34954	0.34	0.173	2.32334e-19	CC	Up	1.44361	7.7209e-06	0.000333789
g37937	2.6158e-85	-1.75008	0.45	0.796	5.0056e-81	CC	Down
g37944	2.42077e-87	-1.66303	0.478	0.806	4.63239e-83	CC	Down
g38015	0.00890338	0.484604	0.454	0.398	1	CC	Up
g3803	6.41041e-58	-2.2687	0.184	0.563	1.2267e-53	CC	Down
g38032	1.13985e-11	0.916152	0.408	0.287	2.18121e-07	CC	Up
g38036	4.94966e-38	-1.5768	0.202	0.51	9.47166e-34	CC	Down	1.97731	0.00079647	0.0119181
g38043	4.33715e-05	-0.738611	0.191	0.271	0.829957	CC	Down
g38044	8.10043e-57	-1.24902	0.717	0.868	1.5501e-52	CC	Down	1.2374	8.39121e-05	0.0021668
g38054	1.11185e-09	-0.51235	0.303	0.445	2.12763e-05	CC	Down
g38063	3.36327e-05	0.769205	0.384	0.319	0.643595	CC	Up
g38065	2.55091e-05	0.563633	0.441	0.366	0.488142	CC	Up
g38101	2.49062e-12	-0.419509	0.502	0.649	4.76605e-08	CC	Down
g38107	3.18364e-25	-1.06191	0.265	0.508	6.09221e-21	CC	Down
g3811	0.00789058	0.439433	0.351	0.309	1	CC	Up
g38169	1.31026e-08	-0.279666	0.533	0.428	0.000250731	CC	Down
g38184	0.000162986	0.372249	0.638	0.593	1	CC	Up
g38187	2.23463e-05	-0.303929	0.268	0.374	0.427618	CC	Down
g38190	1.11385e-15	0.948489	0.419	0.269	2.13146e-11	CC	Up
g38230	0.000847438	0.733509	0.272	0.219	1	CC	Up
g38237	1.12426e-27	-2.19568	0.088	0.328	2.15139e-23	CC	Down
g38238	4.03175e-11	0.716753	0.55	0.458	7.71515e-07	CC	Up
g38246	6.09177e-05	-0.293538	0.239	0.34	1	CC	Down	1.09331	1.67672e-05	0.000619121
g38277	0.000553379	0.484839	0.318	0.257	1	CC	Up
g38278	0.00850928	0.479914	0.307	0.258	1	CC	Up
g38296	5.5474e-47	-0.601027	0.844	0.943	1.06155e-42	CC	Down	2.09482	1.09267e-05	0.000440955
g38300	1.14844e-17	-1.02136	0.211	0.402	2.19765e-13	CC	Down
g38327	6.86012e-05	-0.489826	0.215	0.3	1	CC	Down
g38334	5.72135e-99	-1.89972	0.441	0.82	1.09484e-94	CC	Down
g38350	1.14613e-34	-1.23987	0.257	0.554	2.19324e-30	CC	Down
g38359	3.45167e-17	1.63127	0.436	0.298	6.60511e-13	CC	Up
g38360	4.40844e-05	0.539058	0.529	0.479	0.843599	CC	Up	-1.12194	2.68352e-06	0.000143035
g38374	8.71512e-05	0.378026	0.471	0.402	1	CC	Up
g38436	2.20807e-17	-0.9533	0.191	0.393	4.22537e-13	CC	Down
g3844	2.51237e-09	0.934475	0.397	0.292	4.80766e-05	CC	Up
g38443	3.88025e-07	-0.294406	0.329	0.46	0.00742525	CC	Down
g38485	0.00433233	0.475229	0.305	0.25	1	CC	Up
g3854	2.55224e-84	2.59177	0.353	0.092	4.88396e-80	CC	Up
g38548	8.78779e-47	1.4322	0.844	0.81	1.68163e-42	CC	Up
g38549	2.85528e-34	1.16779	0.779	0.691	5.46387e-30	CC	Up
g38552	7.87442e-07	0.350425	0.833	0.799	0.0150685	CC	Up
g3856	8.76972e-06	0.428744	0.474	0.4	0.167817	CC	Up
g38560	6.59584e-07	0.676961	0.487	0.42	0.0126218	CC	Up
g38591	9.72115e-27	0.691682	0.862	0.804	1.86024e-22	CC	Up
g38594	6.68398e-05	0.591169	0.447	0.374	1	CC	Up
g38630	5.52307e-08	0.833956	0.436	0.345	0.00105689	CC	Up
g38632	2.71952e-26	1.52919	0.322	0.15	5.20408e-22	CC	Up
g38635	0.00277359	0.540467	0.303	0.25	1	CC	Up
g38644	2.58629e-09	0.547333	0.529	0.426	4.94913e-05	CC	Up
g38645	9.45762e-07	0.485436	0.662	0.639	0.0180981	CC	Up
g38646	1.16687e-10	-0.544005	0.263	0.426	2.23292e-06	CC	Down	1.25738	7.25604e-06	0.000316557
g3865	0.00230208	0.513385	0.388	0.337	1	CC	Up
g38656	6.9129e-58	1.52504	0.399	0.137	1.32285e-53	CC	Up
g38658	3.50743e-253	4.43684	0.25	0.019	6.71181e-249	CC	Up
g38669	9.58874e-05	0.61525	0.572	0.545	1	CC	Up
g38670	4.91921e-07	0.875862	0.274	0.188	0.0094134	CC	Up
g38682	3.47042e-05	-0.384505	0.294	0.385	0.664099	CC	Down
g38683	8.25492e-22	-0.889	0.283	0.51	1.57966e-17	CC	Down
g38686	5.64863e-14	-1.12319	0.116	0.279	1.08092e-09	CC	Down
g38687	2.9064e-08	0.73755	0.386	0.29	0.000556169	CC	Up
g38689	7.56781e-76	3.85384	0.314	0.082	1.44818e-71	CC	Up	1.75711	0.00113556	0.0155492
g38694	0.00106625	0.532492	0.311	0.252	1	CC	Up
g38695	1.01935e-06	0.766455	0.285	0.197	0.0195063	CC	Up
g38705	2.86091e-16	1.18997	0.485	0.357	5.47464e-12	CC	Up
g38710	1.18288e-11	-0.686189	0.189	0.348	2.26357e-07	CC	Down	2.2591	1.09421e-05	0.00044111
g38712	0.000137983	0.604864	0.526	0.489	1	CC	Up
g38752	5.42887e-10	0.953727	0.471	0.358	1.03887e-05	CC	Up
g38835	3.40975e-09	-0.727278	0.202	0.341	6.5249e-05	CC	Down
g38836	2.20201e-07	-0.670944	0.2	0.311	0.00421377	CC	Down
g38848	0.000130742	0.430418	0.471	0.411	1	CC	Up
g38849	0.000202405	0.592919	0.322	0.255	1	CC	Up
g38850	1.18146e-61	1.04728	0.882	0.708	2.26085e-57	CC	Up
g38876	9.20205e-22	0.805379	0.759	0.701	1.7609e-17	CC	Up
g3888	2.11986e-29	1.02841	0.586	0.403	4.05656e-25	CC	Up
g38948	4.14995e-24	-1.6314	0.129	0.361	7.94134e-20	CC	Down
g38959	4.37245e-33	-1.17175	0.351	0.615	8.36713e-29	CC	Down
g38960	1.61465e-23	-2.50974	0.064	0.272	3.08979e-19	CC	Down
g38974	3.76365e-06	0.514799	0.27	0.185	0.0720213	CC	Up
g38995	1.90756e-46	-2.06246	0.169	0.519	3.65032e-42	CC	Down
g39004	1.02237e-66	-1.9266	0.329	0.68	1.9564e-62	CC	Down	1.0619	2.91839e-05	0.000953266
g39022	1.29587e-05	0.407565	0.485	0.404	0.247978	CC	Up	1.09797	0.000241113	0.00491445
g39040	0.0048639	-0.412443	0.248	0.307	1	CC	Down
g39147	3.70268e-125	3.15662	0.336	0.063	7.08545e-121	CC	Up
g39165	1.23694e-55	-1.55145	0.336	0.676	2.36701e-51	CC	Down	1.25002	4.14248e-07	3.04448e-05
g39167	0.00393939	0.693437	0.373	0.318	1	CC	Up
g39206	6.49323e-243	3.40984	0.467	0.068	1.24254e-238	CC	Up
g39208	2.69815e-40	-1.2787	0.346	0.625	5.16318e-36	CC	Down
g39213	2.10146e-23	-1.24474	0.259	0.487	4.02135e-19	CC	Down
g39229	1.72786e-21	-0.627561	0.518	0.701	3.30644e-17	CC	Down
g39231	9.40375e-16	-1.25114	0.116	0.29	1.7995e-11	CC	Down
g39268	4.17816e-07	0.545094	0.651	0.611	0.00799533	CC	Up
g39285	6.0684e-22	-1.23092	0.175	0.398	1.16125e-17	CC	Down
g39351	2.25628e-07	0.875354	0.281	0.192	0.00431762	CC	Up
g39398	7.79529e-24	-1.01352	0.257	0.496	1.49171e-19	CC	Down
g3941	5.48387e-15	1.56596	0.338	0.215	1.04939e-10	CC	Up
g3961	1.67255e-05	-0.507295	0.23	0.32	0.32006	CC	Down
g3967	7.40863e-50	-1.17924	0.577	0.767	1.41772e-45	CC	Down
g39758	2.73038e-26	1.55768	0.287	0.125	5.22486e-22	CC	Up
g39766	1.37256e-11	0.583342	0.533	0.418	2.62653e-07	CC	Up
g3987	2.71237e-51	-1.63817	0.3	0.633	5.19039e-47	CC	Down
g3990	1.06253e-12	-0.839421	0.18	0.341	2.03325e-08	CC	Down
g400	2.56687e-28	-1.84215	0.096	0.352	4.91196e-24	CC	Down
g4012	4.13729e-96	-2.02214	0.489	0.866	7.91711e-92	CC	Down
g40225	0.00511926	0.468606	0.252	0.202	1	CC	Up
g40432	1.36911e-06	0.849895	0.327	0.244	0.0261993	CC	Up
g405	2.12763e-12	0.95007	0.34	0.206	4.07143e-08	CC	Up
g40628	7.54961e-40	1.17803	0.84	0.756	1.44469e-35	CC	Up
g40686	6.04276e-07	0.59904	0.3	0.206	0.0115634	CC	Up
g40754	2.27082e-08	-0.631197	0.151	0.275	0.000434544	CC	Down
g40834	1.6483e-47	1.65338	0.482	0.22	3.15418e-43	CC	Up
g4086	4.56169e-21	-1.6786	0.066	0.263	8.72925e-17	CC	Down
g40876	4.45141e-14	-0.498948	0.395	0.573	8.51821e-10	CC	Down
g40877	3.60842e-23	0.875051	0.726	0.602	6.90508e-19	CC	Up
g4088	3.27374e-06	0.738242	0.303	0.22	0.0626462	CC	Up
g40891	1.72788e-33	-1.34085	0.2	0.497	3.30647e-29	CC	Down	1.02031	1.28505e-08	1.65915e-06
g40930	2.24903e-45	1.53328	0.307	0.102	4.30374e-41	CC	Up
g40968	2.68212e-09	-0.330063	0.206	0.348	5.13251e-05	CC	Down	-1.49946	0.000182649	0.00396833
g41000	2.10863e-38	2.19935	0.417	0.209	4.03507e-34	CC	Up
g41081	2.19627e-80	2.07422	0.507	0.181	4.20278e-76	CC	Up
g41083	3.2887e-33	-1.89876	0.105	0.385	6.29325e-29	CC	Down
g41105	4.32691e-33	1.36181	0.393	0.183	8.27998e-29	CC	Up
g41199	7.69685e-06	0.693363	0.357	0.275	0.147287	CC	Up
g41261	8.81156e-06	-0.490578	0.193	0.288	0.168618	CC	Down
g4159	2.00873e-36	-1.67843	0.257	0.576	3.84391e-32	CC	Down
g416	9.94918e-81	-1.66486	0.43	0.775	1.90387e-76	CC	Down
g41625	2.76334e-47	-1.50536	0.327	0.634	5.28793e-43	CC	Down
g41630	3.63687e-15	-0.989349	0.184	0.357	6.95951e-11	CC	Down
g41650	6.58806e-11	0.300868	0.888	0.881	1.26069e-06	CC	Up
g4169	4.5275e-15	0.576483	0.667	0.534	8.66383e-11	CC	Up
g41699	0.00461848	0.732827	0.254	0.209	1	CC	Up
g41708	4.34395e-08	-0.472155	0.292	0.422	0.000831259	CC	Down
g41713	4.38587e-12	-1.19026	0.167	0.321	8.39281e-08	CC	Down
g41736	0.000135155	0.547438	0.316	0.242	1	CC	Up
g41739	5.62443e-05	0.499575	0.491	0.438	1	CC	Up
g41750	3.23418e-26	-1.41657	0.164	0.416	6.18894e-22	CC	Down
g41751	2.84563e-27	1.79316	0.607	0.468	5.4454e-23	CC	Up
g4176	0.000352558	0.960962	0.307	0.249	1	CC	Up
g41765	1.48488e-09	1.11994	0.353	0.247	2.84146e-05	CC	Up	1.55994	3.37331e-05	0.00106897
g41795	6.54268e-05	0.669679	0.292	0.223	1	CC	Up
g41799	7.85864e-35	-1.73929	0.127	0.421	1.50383e-30	CC	Down
g41808	3.31444e-07	0.402568	0.594	0.51	0.00634251	CC	Up
g41817	5.26385e-07	-0.550698	0.149	0.257	0.0100729	CC	Down
g41840	3.28855e-06	0.715698	0.362	0.273	0.0629296	CC	Up
g41859	9.22483e-37	1.51538	0.417	0.195	1.76526e-32	CC	Up
g41861	2.05272e-27	1.29783	0.305	0.133	3.92809e-23	CC	Up
g41887	1.01351e-11	-0.748693	0.18	0.332	1.93945e-07	CC	Down
g41894	8.59895e-15	-0.815405	0.237	0.426	1.6455e-10	CC	Down	1.37471	0.000760788	0.0115653
g41916	6.36991e-09	0.882962	0.41	0.301	0.000121895	CC	Up
g41940	4.12458e-05	0.693448	0.309	0.242	0.78928	CC	Up
g41946	3.31011e-19	1.17446	0.443	0.285	6.33423e-15	CC	Up
g41970	4.71959e-209	3.5241	0.353	0.045	9.03141e-205	CC	Up	1.0569	0.00184866	0.0222591
g42000	1.10766e-28	1.7786	0.594	0.42	2.11962e-24	CC	Up
g42071	8.87662e-26	-2.23468	0.079	0.308	1.69863e-21	CC	Down	1.43058	0.00522066	0.0473128
g42074	6.90868e-77	2.32533	0.715	0.443	1.32204e-72	CC	Up
g42076	1.71276e-07	0.504104	0.417	0.31	0.00327753	CC	Up
g42078	0.00403587	0.396339	0.445	0.398	1	CC	Up	1.71481	2.58169e-10	6.02463e-08
g42079	4.51659e-06	0.721484	0.456	0.377	0.0864294	CC	Up
g42080	3.54466e-46	1.89991	0.379	0.151	6.78306e-42	CC	Up
g42082	2.02265e-08	0.486947	0.737	0.7	0.000387055	CC	Up
g42084	1.47278e-48	-1.33439	0.384	0.684	2.81831e-44	CC	Down	1.57992	3.79113e-07	2.8285e-05
g42088	2.18405e-14	0.930097	0.333	0.196	4.1794e-10	CC	Up	-1.37899	2.8247e-05	0.000928359
g42093	2.14995e-67	1.68158	0.774	0.505	4.11415e-63	CC	Up
g42095	7.82175e-213	3.47195	0.371	0.049	1.49677e-208	CC	Up
g42108	1.02885e-191	4.06211	0.333	0.044	1.9688e-187	CC	Up
g42109	4.99924e-14	1.07324	0.384	0.244	9.56654e-10	CC	Up
g42132	7.23155e-06	0.63394	0.279	0.202	0.138383	CC	Up
g42145	0.000518041	-0.285403	0.228	0.308	1	CC	Down
g42253	2.84887e-10	0.947571	0.259	0.156	5.45161e-06	CC	Up
g42314	3.67742e-10	0.725733	0.287	0.177	7.03711e-06	CC	Up
g42315	5.37574e-13	-0.535069	0.281	0.454	1.0287e-08	CC	Down
g42317	1.15429e-111	3.26491	0.322	0.064	2.20886e-107	CC	Up
g42333	6.04618e-54	1.22533	0.469	0.19	1.157e-49	CC	Up	-1.06991	0.000108693	0.0026475
g42334	2.85097e-53	2.18919	0.274	0.078	5.45562e-49	CC	Up
g42337	3.81834e-53	2.57117	0.285	0.088	7.30677e-49	CC	Up	1.82152	8.15626e-05	0.00212335
g42339	2.34197e-43	1.38751	0.623	0.361	4.48158e-39	CC	Up
g42350	4.68618e-06	-0.629863	0.202	0.305	0.0896748	CC	Down
g42372	1.75511e-16	-1.68634	0.086	0.252	3.35858e-12	CC	Down
g42380	1.88959e-06	0.514936	0.377	0.282	0.0361593	CC	Up
g42425	1.04486e-12	-1.38438	0.112	0.26	1.99945e-08	CC	Down
g42441	4.34428e-12	0.977485	0.353	0.229	8.31321e-08	CC	Up
g42454	6.03217e-16	0.67564	0.502	0.333	1.15432e-11	CC	Up
g42462	1.60141e-17	0.829428	0.428	0.269	3.06446e-13	CC	Up
g42468	0.0073099	0.732665	0.384	0.346	1	CC	Up	1.1351	0.0029695	0.0316403
g42475	1.21917e-08	-0.501973	0.314	0.442	0.000233301	CC	Down
g42477	3.1021e-49	1.12294	0.616	0.304	5.93618e-45	CC	Up
g42480	1.33447e-24	1.21277	0.548	0.379	2.55364e-20	CC	Up
g42487	0.000358997	0.504505	0.39	0.323	1	CC	Up
g42502	1.05397e-45	0.989169	0.888	0.833	2.01687e-41	CC	Up
g42512	1.62408e-21	0.991063	0.511	0.332	3.10785e-17	CC	Up	1.26514	0.00170932	0.0209846
g42542	3.51135e-10	0.808197	0.397	0.286	6.71932e-06	CC	Up
g42544	1.29487e-07	-0.528917	0.193	0.317	0.00247785	CC	Down
g42575	1.18565e-17	-0.787006	0.195	0.403	2.26886e-13	CC	Down
g42579	0.000176223	0.580569	0.3	0.236	1	CC	Up
g42585	4.82986e-204	3.30871	0.388	0.055	9.24242e-200	CC	Up
g4262	1.22033e-06	0.690068	0.303	0.214	0.0233523	CC	Up
g42620	6.9511e-42	1.82124	0.34	0.133	1.33016e-37	CC	Up
g42630	2.47069e-45	-0.856423	0.599	0.835	4.72792e-41	CC	Down
g42632	6.75966e-49	2.93694	0.344	0.125	1.29353e-44	CC	Up
g42642	2.84933e-45	-1.50577	0.254	0.594	5.45248e-41	CC	Down
g42645	5.92721e-35	-1.21544	0.303	0.587	1.13423e-30	CC	Down	1.44103	5.87275e-09	8.6656e-07
g42657	5.24989e-36	-1.15796	0.377	0.638	1.00462e-31	CC	Down	1.35885	8.60033e-09	1.17931e-06
g42660	1.07103e-07	0.672898	0.329	0.233	0.00204953	CC	Up
g42661	5.70378e-14	1.00656	0.322	0.191	1.09148e-09	CC	Up
g42725	1.33146e-13	-0.926038	0.254	0.414	2.54788e-09	CC	Down
g42726	4.16108e-23	1.46834	0.252	0.109	7.96265e-19	CC	Up
g42727	1.29191e-05	0.651745	0.404	0.332	0.24722	CC	Up
g42729	4.52803e-12	-0.790271	0.16	0.314	8.66483e-08	CC	Down
g42739	2.24256e-06	0.555003	0.805	0.87	0.0429137	CC	Up
g42751	4.33173e-18	-1.68819	0.101	0.28	8.2892e-14	CC	Down
g42752	1.80364e-23	1.42437	0.285	0.132	3.45145e-19	CC	Up
g42772	1.87703e-06	-0.426826	0.48	0.591	0.0359188	CC	Down
g42779	2.65366e-16	-1.11375	0.16	0.343	5.07805e-12	CC	Down
g42780	5.78601e-14	1.76043	0.533	0.447	1.10721e-09	CC	Up
g42784	4.25268e-17	1.22466	0.39	0.24	8.13792e-13	CC	Up
g42791	5.24944e-27	-1.64206	0.125	0.372	1.00453e-22	CC	Down
g4281	0.000328406	0.769708	0.272	0.215	1	CC	Up
g42817	2.33315e-13	0.797122	0.417	0.274	4.46471e-09	CC	Up
g42819	3.71409e-06	0.279358	0.279	0.188	0.0710728	CC	Up
g42831	2.5448e-17	-1.18221	0.237	0.429	4.86974e-13	CC	Down
g42836	1.9469e-22	0.49706	0.853	0.826	3.72559e-18	CC	Up
g42837	5.73824e-71	-2.03226	0.259	0.664	1.09807e-66	CC	Down
g4285	5.49292e-08	-0.573906	0.184	0.309	0.00105112	CC	Down
g42853	1.42356e-07	0.785912	0.296	0.203	0.00272412	CC	Up
g42867	1.41481e-05	0.574555	0.603	0.542	0.270737	CC	Up
g4287	1.12384e-38	-1.39605	0.215	0.538	2.15057e-34	CC	Down
g42870	0	4.93882	0.404	0.018	0	CC	Up
g42874	4.91669e-37	0.902055	0.811	0.693	9.40857e-33	CC	Up
g42876	1.49696e-92	-1.55019	0.695	0.892	2.86459e-88	CC	Down	1.18196	7.60782e-09	1.06893e-06
g42877	2.15769e-10	0.945684	0.287	0.176	4.12896e-06	CC	Up
g4294	8.17002e-23	-0.869679	0.309	0.539	1.56341e-18	CC	Down
g42947	7.38109e-09	1.19262	0.25	0.161	0.000141245	CC	Up
g42957	0.000502962	0.536038	0.283	0.219	1	CC	Up
g42961	5.86539e-08	-0.835838	0.151	0.265	0.0011224	CC	Down
g42978	6.32774e-09	-0.760137	0.16	0.284	0.000121088	CC	Down
g42984	1.81344e-08	0.68068	0.386	0.28	0.00034702	CC	Up
g42992	1.53871e-40	1.67222	0.406	0.18	2.94447e-36	CC	Up
g42994	1.32583e-10	-0.424496	0.305	0.458	2.5371e-06	CC	Down
g4303	1.16788e-11	0.72479	0.566	0.458	2.23486e-07	CC	Up
g43049	5.93096e-19	-1.59049	0.136	0.326	1.13495e-14	CC	Down
g43057	3.38595e-06	0.617835	0.404	0.315	0.0647935	CC	Up
g4306	1.19631e-12	0.967458	0.285	0.167	2.28926e-08	CC	Up
g4307	0.000148021	0.641903	0.388	0.321	1	CC	Up
g43076	9.87412e-18	-1.16711	0.105	0.294	1.88951e-13	CC	Down
g43078	1.11901e-64	3.66907	0.39	0.14	2.14133e-60	CC	Up
g43088	1.85873e-10	0.984292	0.366	0.251	3.55687e-06	CC	Up
g43091	0.00729151	0.414205	0.75	0.762	1	CC	Up
g43097	2.21484e-13	-0.872697	0.14	0.307	4.23832e-09	CC	Down	1.90894	4.79281e-24	1.83167e-20
g43118	6.81558e-48	-1.45086	0.311	0.642	1.30423e-43	CC	Down
g43124	0.00523723	0.742241	0.257	0.213	1	CC	Up
g43136	2.3548e-128	2.96005	0.461	0.114	4.50615e-124	CC	Up
g43148	5.41658e-11	-0.699434	0.147	0.285	1.03652e-06	CC	Down
g43150	5.64438e-11	-0.467336	0.303	0.472	1.08011e-06	CC	Down
g43167	6.20375e-18	-0.815224	0.268	0.473	1.18715e-13	CC	Down
g43199	0.00447701	-0.352319	0.206	0.27	1	CC	Down
g432	8.91747e-12	-0.666231	0.239	0.408	1.70645e-07	CC	Down	1.04613	0.00423527	0.0406375
g43219	2.43462e-05	0.67415	0.445	0.392	0.465888	CC	Up
g43230	1.08855e-46	1.36916	0.735	0.553	2.08305e-42	CC	Up
g43231	2.25022e-08	0.533389	0.557	0.435	0.000430601	CC	Up	5.66263	0.000285439	0.00555712
g43232	2.67038e-07	0.630981	0.524	0.436	0.00511003	CC	Up	6.42267	0.00259694	0.028618
g43233	7.79326e-06	0.618892	0.544	0.469	0.149132	CC	Up	7.08964	3.69561e-05	0.00114083
g43234	0.00888555	0.356318	0.533	0.479	1	CC	Up	6.34243	2.71264e-07	2.1157e-05
g43239	1.10517e-141	2.53089	0.656	0.215	2.11486e-137	CC	Up
g43240	1.58167e-06	0.484843	0.41	0.315	0.0302668	CC	Up
g43253	0	7.45952	0.504	0.014	0	CC	Up
g43257	0.00083686	0.333502	0.66	0.65	1	CC	Up
g43291	0.00629587	0.334297	0.289	0.237	1	CC	Up
g43297	1.65862e-19	-0.90095	0.303	0.51	3.17394e-15	CC	Down
g43338	4.46807e-06	0.781665	0.355	0.274	0.0855009	CC	Up
g43371	3.79098e-10	0.996628	0.384	0.271	7.25441e-06	CC	Up
g43385	1.32398e-89	-1.5783	0.669	0.874	2.53356e-85	CC	Down
g43386	3.56028e-35	-1.6042	0.154	0.45	6.81295e-31	CC	Down
g4341	1.04182e-33	1.0244	0.645	0.433	1.99363e-29	CC	Up
g43411	9.19668e-97	-1.92183	0.428	0.793	1.75988e-92	CC	Down
g43435	1.38877e-21	-1.43473	0.125	0.339	2.65755e-17	CC	Down
g43457	1.38815e-27	1.0308	0.515	0.301	2.65636e-23	CC	Up
g43460	4.28739e-62	-1.6265	0.414	0.723	8.20435e-58	CC	Down
g43487	2.30283e-25	1.55979	0.471	0.311	4.4067e-21	CC	Up
g43575	6.55796e-11	-0.839674	0.171	0.314	1.25493e-06	CC	Down
g43657	3.85795e-06	0.48275	0.419	0.328	0.0738258	CC	Up
g43664	2.73809e-74	-1.31625	0.673	0.864	5.2396e-70	CC	Down
g43672	1.07984e-34	1.77236	0.276	0.103	2.06639e-30	CC	Up
g43715	6.58944e-09	1.06236	0.259	0.168	0.000126096	CC	Up
g43735	1.30471e-17	1.05624	0.41	0.258	2.49669e-13	CC	Up
g43774	1.91194e-42	-1.07197	0.443	0.722	3.65869e-38	CC	Down	1.07951	9.32841e-05	0.00234542
g43775	4.60875e-27	-1.52478	0.121	0.375	8.8193e-23	CC	Down
g43819	0.000329972	-0.405224	0.318	0.406	1	CC	Down
g43893	0.00772592	0.770548	0.25	0.208	1	CC	Up
g43899	4.31182e-07	0.649291	0.346	0.251	0.00825109	CC	Up
g43900	1.72661e-43	1.16894	0.625	0.365	3.30404e-39	CC	Up
g43959	4.48389e-25	-1.20317	0.138	0.387	8.58037e-21	CC	Down
g43972	3.42941e-51	1.74855	0.362	0.128	6.56252e-47	CC	Up
g4398	6.35074e-21	-1.73883	0.096	0.297	1.21528e-16	CC	Down
g44049	0.00014387	0.675286	0.259	0.192	1	CC	Up
g44152	5.32628e-118	2.58407	0.425	0.101	1.01924e-113	CC	Up
g44293	1.93775e-199	3.44185	0.336	0.042	3.70808e-195	CC	Up	1.06223	0.000169182	0.00372443
g4430	9.17593e-22	1.31807	0.254	0.113	1.75591e-17	CC	Up
g4433	1.99476e-06	0.577348	0.529	0.469	0.0381718	CC	Up
g44374	1.7399e-50	1.40142	0.649	0.398	3.32946e-46	CC	Up
g444	1.42405e-15	-1.22269	0.149	0.325	2.72507e-11	CC	Down
g4441	1.10931e-18	-1.9138	0.105	0.292	2.12278e-14	CC	Down
g44467	2.50511e-22	1.6537	0.34	0.175	4.79378e-18	CC	Up
g4449	1.26879e-31	1.09536	0.796	0.696	2.42795e-27	CC	Up
g44493	2.31736e-11	0.808665	0.296	0.181	4.43451e-07	CC	Up
g446	7.93487e-07	-0.365181	0.158	0.269	0.0151842	CC	Down
g4464	3.9052e-24	1.8401	0.491	0.332	7.47299e-20	CC	Up
g44709	8.97158e-11	0.980515	0.259	0.151	1.7168e-06	CC	Up
g44735	8.09923e-69	-1.70202	0.325	0.703	1.54987e-64	CC	Down
g4477	3.0406e-20	-1.47884	0.127	0.329	5.8185e-16	CC	Down
g44770	2.07047e-73	-1.69226	0.399	0.739	3.96206e-69	CC	Down
g4478	0.000461596	0.522504	0.526	0.496	1	CC	Up
g44820	2.16306e-07	0.67679	0.564	0.51	0.00413924	CC	Up
g4488	1.82664e-06	0.535426	0.406	0.318	0.0349545	CC	Up
g44940	1.14541e-11	-0.856577	0.18	0.332	2.19185e-07	CC	Down	1.17592	3.87146e-05	0.00118289
g44968	1.58052e-09	-0.738067	0.226	0.36	3.02449e-05	CC	Down	1.34219	0.000133695	0.00310414
g4500	3.96978e-71	1.66612	0.362	0.101	7.59658e-67	CC	Up
g4501	8.15532e-05	0.846071	0.27	0.206	1	CC	Up
g45063	9.92552e-24	-1.39873	0.182	0.414	1.89935e-19	CC	Down
g45120	1.58872e-23	0.737356	0.454	0.264	3.04017e-19	CC	Up
g45144	9.48395e-33	1.77863	0.285	0.113	1.81485e-28	CC	Up
g45153	2.66991e-13	1.43987	0.303	0.188	5.10913e-09	CC	Up
g45186	0.00396184	0.41782	0.596	0.572	1	CC	Up
g45278	0.00316173	0.446468	0.327	0.274	1	CC	Up
g4530	2.14253e-19	-1.13299	0.16	0.366	4.09994e-15	CC	Down
g4532	1.42419e-13	0.601459	0.855	0.869	2.72533e-09	CC	Up
g4533	7.66117e-10	0.68792	0.618	0.553	1.46604e-05	CC	Up
g4542	0.00902795	0.403836	0.272	0.222	1	CC	Up
g4551	6.91275e-26	-1.73944	0.099	0.337	1.32282e-21	CC	Down
g45600	3.36351e-05	-0.673994	0.204	0.292	0.643641	CC	Down
g45695	1.08705e-16	-0.845266	0.276	0.475	2.08017e-12	CC	Down
g45750	0.000910916	0.544866	0.447	0.389	1	CC	Up
g45761	9.05983e-100	-1.55774	0.754	0.934	1.73369e-95	CC	Down
g45799	1.78649e-15	-0.864958	0.182	0.371	3.41862e-11	CC	Down
g45801	8.54931e-08	-0.5253	0.434	0.56	0.001636	CC	Down
g45829	1.21187e-10	0.865586	0.428	0.318	2.31903e-06	CC	Up
g45846	0.0034958	0.686402	0.307	0.26	1	CC	Up
g4591	1.59531e-18	-1.60259	0.101	0.291	3.05278e-14	CC	Down
g4592	0.00182323	0.361208	0.827	0.833	1	CC	Up
g45944	9.91787e-94	2.59464	0.322	0.072	1.89788e-89	CC	Up
g45954	9.36527e-22	1.19245	0.581	0.474	1.79214e-17	CC	Up
g45955	2.55528e-06	0.809815	0.314	0.227	0.0488979	CC	Up
g45971	3.28093e-12	0.819308	0.292	0.169	6.27838e-08	CC	Up
g46138	5.96182e-08	-0.612884	0.226	0.35	0.00114085	CC	Down
g4616	1.73273e-05	0.654006	0.32	0.241	0.331576	CC	Up	1.09613	0.000690866	0.0107987
g46227	1.50146e-46	-1.6225	0.283	0.599	2.87319e-42	CC	Down	1.20844	6.8228e-07	4.66516e-05
g46241	1.35365e-38	1.71454	0.311	0.118	2.59035e-34	CC	Up
g46266	8.98172e-07	0.633809	0.491	0.416	0.0171874	CC	Up
g46272	2.45599e-12	0.868118	0.507	0.388	4.69978e-08	CC	Up
g46279	3.44273e-15	1.82322	0.55	0.451	6.58802e-11	CC	Up
g46297	5.53277e-20	0.863923	0.489	0.299	1.05875e-15	CC	Up
g463	1.8098e-11	-0.937966	0.164	0.311	3.46324e-07	CC	Down
g4630	6.54009e-53	-1.57355	0.322	0.655	1.25151e-48	CC	Down	1.06762	9.15483e-07	5.95017e-05
g46312	1.86816e-27	1.04205	0.599	0.418	3.57491e-23	CC	Up
g46322	1.13016e-13	0.758655	0.261	0.14	2.16267e-09	CC	Up
g46350	3.39197e-25	1.17647	0.434	0.248	6.49087e-21	CC	Up
g46355	1.18372e-10	0.578436	0.498	0.355	2.26516e-06	CC	Up
g46357	8.4725e-20	-1.48578	0.072	0.269	1.6213e-15	CC	Down
g46358	0.000782134	-0.839889	0.226	0.286	1	CC	Down
g46388	4.52488e-16	1.91393	0.309	0.178	8.6588e-12	CC	Up
g46449	0.000148953	0.529643	0.504	0.449	1	CC	Up
g46494	5.10162e-63	1.19419	0.851	0.682	9.76247e-59	CC	Up
g46545	3.752e-56	-1.55418	0.338	0.673	7.17982e-52	CC	Down
g46564	7.53308e-15	-0.510456	0.662	0.77	1.44153e-10	CC	Down
g46566	0.000200642	0.706536	0.425	0.364	1	CC	Up
g46591	3.74789e-116	-1.5455	0.899	0.983	7.17196e-112	CC	Down
g46607	2.17552e-12	1.09888	0.279	0.161	4.16307e-08	CC	Up
g46629	2.41869e-06	0.591853	0.493	0.456	0.046284	CC	Up
g46635	2.1999e-13	-1.10385	0.149	0.312	4.20974e-09	CC	Down
g46649	7.60651e-06	-0.596189	0.189	0.282	0.145558	CC	Down
g46679	1.27013e-19	-1.9001	0.096	0.29	2.43053e-15	CC	Down	2.51491	2.31067e-16	2.59726e-13
g46681	6.46557e-18	-1.96662	0.112	0.29	1.23725e-13	CC	Down	1.64873	7.23826e-09	1.02834e-06
g46697	2.16788e-19	-0.832173	0.357	0.57	4.14845e-15	CC	Down
g46711	3.03293e-07	0.522027	0.741	0.767	0.00580382	CC	Up
g46717	4.02784e-11	0.919534	0.298	0.185	7.70768e-07	CC	Up
g46789	8.59268e-58	-2.34001	0.143	0.536	1.6443e-53	CC	Down
g46798	0.0018684	0.497534	0.48	0.449	1	CC	Up
g46800	2.45879e-15	-0.52698	0.469	0.643	4.70514e-11	CC	Down
g46802	1.16375e-37	-1.49251	0.208	0.51	2.22696e-33	CC	Down	1.24609	2.36605e-08	2.7401e-06
g46819	9.24162e-23	1.07922	0.485	0.297	1.76848e-18	CC	Up
g46828	0	4.72957	0.263	0.015	0	CC	Up
g46829	4.51177e-20	0.723323	0.3	0.142	8.63371e-16	CC	Up
g4683	7.6316e-13	1.05702	0.318	0.191	1.46038e-08	CC	Up
g46847	1.37241e-11	0.82897	0.303	0.184	2.62625e-07	CC	Up
g46862	1.2867e-21	1.06836	0.513	0.336	2.46224e-17	CC	Up
g46866	1.92112e-81	2.62288	0.318	0.079	3.67625e-77	CC	Up
g46870	8.3067e-31	1.24918	0.75	0.631	1.58957e-26	CC	Up
g4700	6.03755e-05	0.4867	0.397	0.324	1	CC	Up
g4707	1.0636e-05	-0.456843	0.206	0.301	0.203531	CC	Down	1.03092	0.00160902	0.0201613
g47074	1.45605e-31	-1.25761	0.3	0.566	2.78629e-27	CC	Down
g47077	2.4849e-13	0.757383	0.607	0.515	4.7551e-09	CC	Up
g47081	7.05694e-23	-1.45327	0.132	0.356	1.35042e-18	CC	Down
g47082	9.82277e-08	0.576484	0.382	0.28	0.00187969	CC	Up
g47083	2.02848e-07	0.659101	0.395	0.297	0.00388169	CC	Up
g47096	3.69377e-05	0.519412	0.27	0.198	0.706839	CC	Up
g47098	1.77778e-14	0.852624	0.346	0.206	3.40197e-10	CC	Up
g47099	1.12813e-15	-0.668346	0.406	0.632	2.15879e-11	CC	Down
g47107	1.05525e-09	-0.88291	0.129	0.254	2.01933e-05	CC	Down	1.19204	1.51605e-06	9.02477e-05
g47113	0.00484056	0.394891	0.895	0.921	1	CC	Up
g47123	5.4638e-13	-1.01686	0.193	0.353	1.04555e-08	CC	Down
g47124	6.55463e-14	0.809305	0.458	0.316	1.25429e-09	CC	Up
g47131	1.16354e-05	0.56069	0.344	0.261	0.222654	CC	Up
g47140	1.65545e-54	-1.41062	0.482	0.737	3.16786e-50	CC	Down
g47160	2.9298e-08	0.999787	0.32	0.223	0.000560647	CC	Up
g47161	3.18553e-10	0.91379	0.325	0.211	6.09584e-06	CC	Up
g47162	1.8753e-16	0.772037	0.658	0.531	3.58858e-12	CC	Up
g47181	0.000142888	0.532801	0.441	0.373	1	CC	Up
g47182	3.37625e-06	-0.523562	0.182	0.276	0.0646079	CC	Down	1.26481	5.02504e-06	0.000239156
g47185	1.13305e-05	0.661366	0.287	0.211	0.216821	CC	Up
g47187	0.00354657	0.600781	0.25	0.199	1	CC	Up
g47190	5.12369e-07	-0.709926	0.202	0.308	0.0098047	CC	Down
g47202	4.26688e-05	0.909964	0.314	0.239	0.816509	CC	Up
g47203	9.1968e-30	0.924029	0.594	0.375	1.7599e-25	CC	Up
g47213	9.84924e-06	0.741355	0.482	0.446	0.188475	CC	Up
g47216	0.000115062	-0.395495	0.265	0.35	1	CC	Down
g47244	1.21807e-21	-1.23224	0.224	0.441	2.3309e-17	CC	Down
g47256	8.6507e-11	-1.01505	0.134	0.27	1.6554e-06	CC	Down
g4732	2.87064e-102	1.97754	0.809	0.368	5.49325e-98	CC	Up
g4737	4.8987e-13	0.743115	0.546	0.442	9.37415e-09	CC	Up
g4739	0.00760511	0.396054	0.329	0.285	1	CC	Up
g47408	3.98752e-07	0.619693	0.719	0.701	0.00763051	CC	Up
g47457	0.000368225	0.318128	0.726	0.706	1	CC	Up
g47461	3.57203e-30	-1.27246	0.228	0.502	6.83544e-26	CC	Down	1.17774	6.69216e-13	3.00887e-10
g4765	6.69492e-09	0.578466	0.838	0.834	0.000128114	CC	Up
g47680	3.81526e-11	-0.95626	0.118	0.257	7.30089e-07	CC	Down
g47685	0	5.68518	0.537	0.032	0	CC	Up
g47733	0.00403728	0.434971	0.373	0.326	1	CC	Up	1.04844	0.00283954	0.0305583
g4774	0	5.32399	0.276	0.012	0	CC	Up
g47776	1.35413e-25	1.51915	0.638	0.5	2.59125e-21	CC	Up
g4784	1.20981e-18	0.926458	0.447	0.277	2.3151e-14	CC	Up
g4794	1.02884e-25	-1.2403	0.195	0.447	1.96878e-21	CC	Down
g4799	7.32794e-06	-0.546151	0.32	0.426	0.140227	CC	Down	1.35651	0.000506635	0.00859119
g4800	0.00116689	-0.350636	0.388	0.332	1	CC	Down	2.76809	3.01388e-05	0.000974476
g48005	7.62173e-83	2.84095	0.342	0.092	1.45849e-78	CC	Up
g48008	8.12375e-09	0.527964	0.8	0.817	0.000155456	CC	Up
g48009	0.00160265	0.49387	0.612	0.597	1	CC	Up
g48050	2.465e-65	-1.9001	0.221	0.644	4.71703e-61	CC	Down
g48073	0	6.95436	0.439	0.006	0	CC	Up
g48094	1.74147e-07	-0.83403	0.162	0.272	0.00333247	CC	Down
g48141	2.40352e-06	0.52872	0.463	0.374	0.0459938	CC	Up
g4818	1.08046e-15	0.644446	0.691	0.618	2.06758e-11	CC	Up
g48288	2.35015e-08	0.94888	0.296	0.201	0.000449725	CC	Up
g48337	4.07071e-12	0.876956	0.502	0.404	7.78971e-08	CC	Up
g48359	3.43336e-07	0.560401	0.425	0.324	0.00657007	CC	Up
g48426	1.20279e-09	-0.925201	0.419	0.543	2.30166e-05	CC	Down
g48449	5.06266e-27	2.86057	0.283	0.125	9.68791e-23	CC	Up
g48462	3.63751e-48	2.00616	0.436	0.187	6.96074e-44	CC	Up
g48476	0.00020825	0.591553	0.283	0.213	1	CC	Up
g48574	0.0018033	0.701181	0.386	0.341	1	CC	Up
g48576	6.86051e-06	-0.25989	0.228	0.336	0.131283	CC	Down
g48659	2.71886e-15	0.832298	0.48	0.332	5.20281e-11	CC	Up
g48678	1.47628e-09	0.831632	0.395	0.278	2.825e-05	CC	Up
g48682	2.22241e-28	-1.89912	0.107	0.36	4.2528e-24	CC	Down	1.15224	3.18095e-08	3.52366e-06
g48811	1.72774e-46	-1.45869	0.314	0.635	3.30621e-42	CC	Down	1.12361	6.56611e-05	0.00181313
g48926	3.06072e-75	-1.56002	0.509	0.792	5.857e-71	CC	Down	1.08671	2.32607e-08	2.71851e-06
g48932	2.57548e-09	0.948203	0.279	0.175	4.92845e-05	CC	Up
g48975	1.33336e-07	0.55678	0.643	0.609	0.00255152	CC	Up
g49009	2.17329e-41	-1.52597	0.228	0.549	4.15881e-37	CC	Down	1.04394	1.47813e-06	8.85416e-05
g49028	0.000194719	0.486038	0.322	0.253	1	CC	Up
g49063	8.89493e-25	-1.50481	0.125	0.357	1.70213e-20	CC	Down	1.15038	6.24152e-10	1.29637e-07
g49068	3.12316e-16	-0.75468	0.169	0.359	5.97647e-12	CC	Down
g4909	0	6.84507	0.298	0.006	0	CC	Up
g4913	1.25689e-19	0.949839	0.513	0.348	2.40518e-15	CC	Up
g4931	8.89971e-25	0.890447	0.469	0.274	1.70305e-20	CC	Up
g4934	1.20435e-05	0.462353	0.386	0.296	0.230465	CC	Up
g49445	4.83238e-21	1.27771	0.371	0.211	9.24724e-17	CC	Up
g49453	6.07231e-14	0.985433	0.25	0.131	1.162e-09	CC	Up
g4947	1.41886e-07	0.372358	0.715	0.661	0.00271513	CC	Up
g49470	4.98095e-32	1.33698	0.436	0.221	9.53155e-28	CC	Up
g49496	0.00738511	0.402253	0.667	0.636	1	CC	Up
g4951	7.68167e-29	1.26968	0.5	0.289	1.46996e-24	CC	Up
g4953	1.87814e-290	4.75273	0.257	0.017	3.59401e-286	CC	Up
g49608	4.47536e-47	-1.8994	0.151	0.506	8.56405e-43	CC	Down
g49612	2.56338e-22	-1.25088	0.151	0.376	4.90528e-18	CC	Down
g497	5.00569e-26	-1.07043	0.197	0.452	9.57889e-22	CC	Down
g4973	0.00406345	0.381467	0.493	0.447	1	CC	Up	1.38629	0.000328818	0.00619036
g49743	1.86273e-10	1.34382	0.307	0.199	3.56451e-06	CC	Up
g49744	3.20856e-24	-1.17468	0.189	0.428	6.1399e-20	CC	Down
g49760	0.000830614	0.819709	0.373	0.323	1	CC	Up
g49774	4.34511e-05	1.02859	0.257	0.191	0.831481	CC	Up
g49783	1.43304e-20	1.21652	0.338	0.178	2.74227e-16	CC	Up
g49803	0.001792	0.689209	0.305	0.249	1	CC	Up
g49828	6.51824e-06	0.635488	0.353	0.272	0.124733	CC	Up
g49838	7.64611e-08	0.571481	0.664	0.601	0.00146316	CC	Up
g49843	0.00494527	0.42407	0.316	0.269	1	CC	Up
g49871	8.61656e-83	-1.76329	0.373	0.764	1.64886e-78	CC	Down
g49876	0.000213508	0.289887	0.344	0.268	1	CC	Up	-1.30449	3.58088e-05	0.00112081
g4990	8.51251e-07	-0.515622	0.2	0.316	0.0162895	CC	Down
g49910	7.85833e-06	-0.344441	0.32	0.437	0.150377	CC	Down	1.06436	0.000204791	0.00436017
g49933	6.05087e-56	-1.78869	0.226	0.605	1.15789e-51	CC	Down	1.38559	7.21934e-05	0.00195259
g49936	1.67099e-27	-0.91798	0.447	0.665	3.19761e-23	CC	Down
g49940	2.83896e-08	-0.722675	0.175	0.294	0.000543263	CC	Down
g49949	5.59833e-07	0.754648	0.399	0.306	0.010713	CC	Up
g49962	9.64873e-13	-1.32109	0.105	0.251	1.84638e-08	CC	Down
g49968	4.33648e-19	0.887776	0.539	0.386	8.29828e-15	CC	Up
g49986	1.13215e-05	0.684802	0.434	0.362	0.216648	CC	Up
g5001	2.17626e-12	1.04416	0.305	0.184	4.16449e-08	CC	Up
g5003	2.62377e-09	-0.748145	0.175	0.301	5.02085e-05	CC	Down
g5007	4.32268e-58	1.95255	0.463	0.195	8.27188e-54	CC	Up	1.95298	1.00856e-11	3.45108e-09
g50100	3.6561e-05	0.762922	0.592	0.58	0.699631	CC	Up
g50146	2.8806e-46	1.28629	0.39	0.146	5.51231e-42	CC	Up
g5018	0.00751418	0.51693	0.461	0.424	1	CC	Up
g5019	6.56739e-28	1.31472	0.522	0.328	1.25674e-23	CC	Up
g50203	5.61882e-07	-0.769554	0.217	0.324	0.0107522	CC	Down
g50214	5.94934e-30	-1.37397	0.175	0.454	1.13847e-25	CC	Down
g50217	3.64809e-09	0.788722	0.423	0.329	6.98099e-05	CC	Up	1.59994	0.000299481	0.00576649
g50222	0.00287806	-0.767096	0.197	0.254	1	CC	Down
g50297	7.45309e-10	0.465731	0.724	0.675	1.42622e-05	CC	Up
g50302	5.83419e-05	0.430142	0.43	0.358	1	CC	Up
g50319	1.73506e-34	1.57664	0.281	0.105	3.32021e-30	CC	Up
g5032	3.21655e-13	-0.633773	0.178	0.346	6.1552e-09	CC	Down
g50353	8.25022e-68	-1.11963	0.651	0.881	1.57876e-63	CC	Down
g5036	6.66819e-21	1.54268	0.257	0.119	1.27602e-16	CC	Up	1.54106	0.000106261	0.0025982
g50362	6.87184e-52	-1.10238	0.529	0.788	1.315e-47	CC	Down
g50371	1.54548e-41	1.33265	0.75	0.61	2.95742e-37	CC	Up
g50375	1.74858e-11	0.742212	0.257	0.146	3.34608e-07	CC	Up
g5038	1.45316e-11	0.792397	0.43	0.301	2.78077e-07	CC	Up
g50412	2.34465e-37	1.56086	0.526	0.286	4.48672e-33	CC	Up
g50413	2.26257e-10	0.902033	0.252	0.148	4.32965e-06	CC	Up
g50423	4.77155e-34	0.661367	0.932	0.903	9.13084e-30	CC	Up
g50425	1.16001e-41	-1.48585	0.287	0.594	2.21979e-37	CC	Down	1.32922	2.31098e-09	4.11764e-07
g50447	5.00088e-61	-1.53343	0.388	0.727	9.56969e-57	CC	Down
g50458	3.81066e-10	-1.44563	0.149	0.273	7.29207e-06	CC	Down	-1.63772	2.92537e-05	0.000954731
g50500	1.29248e-82	-1.48474	0.61	0.858	2.4733e-78	CC	Down
g50511	1.68227e-26	-1.39538	0.169	0.423	3.2192e-22	CC	Down
g50512	4.84034e-12	0.878455	0.471	0.349	9.26248e-08	CC	Up
g50516	4.38551e-18	0.440964	0.958	0.91	8.39211e-14	CC	Up
g50520	2.13004e-13	0.626551	0.647	0.577	4.07605e-09	CC	Up
g50548	3.9279e-22	-1.17695	0.237	0.45	7.51642e-18	CC	Down
g50574	2.89176e-140	2.77845	0.395	0.077	5.53367e-136	CC	Up
g50581	5.19483e-100	-1.55102	0.849	0.955	9.94084e-96	CC	Down	1.39914	5.00123e-08	5.1518e-06
g50588	2.95505e-30	1.401	0.421	0.213	5.65479e-26	CC	Up
g50602	1.03944e-11	-1.11043	0.136	0.278	1.98908e-07	CC	Down
g50605	3.90094e-10	0.632249	0.557	0.444	7.46484e-06	CC	Up
g50607	2.91e-219	4.12599	0.307	0.033	5.56859e-215	CC	Up
g50608	9.47871e-27	-1.01257	0.425	0.642	1.81385e-22	CC	Down
g50612	1.82379e-56	2.38986	0.382	0.14	3.49e-52	CC	Up	1.37679	0.00028641	0.00557034
g50614	1.19138e-55	1.4004	0.577	0.268	2.27983e-51	CC	Up
g50619	1.19003e-07	0.800283	0.309	0.212	0.00227725	CC	Up
g50759	3.10017e-06	0.963803	0.283	0.201	0.0593249	CC	Up
g50768	0.00141788	0.46651	0.45	0.417	1	CC	Up
g50777	5.25359e-16	1.17352	0.261	0.135	1.00533e-11	CC	Up
g50874	2.82143e-17	0.8258	0.651	0.575	5.3991e-13	CC	Up
g5088	2.69535e-40	1.08342	0.555	0.282	5.15782e-36	CC	Up
g50881	5.28331e-10	1.09521	0.34	0.23	1.01101e-05	CC	Up
g50936	7.37976e-97	-1.72028	0.581	0.845	1.41219e-92	CC	Down
g50938	1.0722e-08	0.776156	0.285	0.185	0.000205176	CC	Up
g5098	6.37906e-10	0.535373	0.452	0.321	1.2207e-05	CC	Up
g51019	9.55612e-15	1.25085	0.254	0.135	1.82866e-10	CC	Up	-1.23666	1.02794e-05	0.000421965
g51024	2.8218e-07	0.477941	0.761	0.769	0.0053998	CC	Up
g51025	3.92485e-64	1.83656	0.792	0.579	7.5106e-60	CC	Up
g5103	1.08678e-14	1.36259	0.303	0.177	2.07966e-10	CC	Up
g5104	6.63431e-44	1.16772	0.761	0.612	1.26954e-39	CC	Up
g5105	4.12929e-29	-0.805043	0.581	0.83	7.9018e-25	CC	Down
g51050	5.29632e-30	0.710565	0.75	0.553	1.0135e-25	CC	Up
g51051	1.59317e-12	0.868542	0.406	0.283	3.04869e-08	CC	Up
g51057	2.97905e-46	2.01713	0.298	0.101	5.70072e-42	CC	Up
g51059	2.75016e-09	0.634453	0.496	0.42	5.26271e-05	CC	Up
g51061	5.71874e-10	0.731993	0.533	0.431	1.09434e-05	CC	Up
g51115	0.00137336	0.637798	0.452	0.425	1	CC	Up
g51120	7.66004e-06	-0.250131	0.333	0.447	0.146583	CC	Down
g51122	4.84663e-26	-1.58927	0.121	0.364	9.27452e-22	CC	Down
g51141	1.13517e-34	1.59767	0.263	0.095	2.17225e-30	CC	Up
g5118	6.492e-54	-1.91778	0.211	0.585	1.24231e-49	CC	Down
g51186	0.0010417	0.440521	0.318	0.251	1	CC	Up
g51198	1.17546e-15	1.14826	0.338	0.196	2.24936e-11	CC	Up
g5128	2.02778e-05	0.577408	0.287	0.208	0.388036	CC	Up
g51305	9.06782e-22	-1.01835	0.254	0.49	1.73522e-17	CC	Down	1.19728	3.9335e-05	0.00119782
g51313	4.12388e-05	0.797628	0.322	0.26	0.789145	CC	Up
g51318	9.10309e-06	-0.603317	0.182	0.275	0.174197	CC	Down
g51349	5.76815e-21	-1.08538	0.232	0.452	1.10379e-16	CC	Down
g51362	2.24595e-10	-0.679415	0.263	0.403	4.29785e-06	CC	Down
g51370	3.87212e-06	0.542912	0.338	0.246	0.0740969	CC	Up
g51374	2.03201e-111	2.19998	0.7	0.305	3.88846e-107	CC	Up
g5139	7.30748e-09	0.602677	0.57	0.479	0.000139836	CC	Up
g51430	0.00562205	0.748149	0.268	0.229	1	CC	Up	-1.09677	0.000157018	0.00351332
g51445	1.38982e-11	-0.658101	0.298	0.459	2.65956e-07	CC	Down
g51565	2.46499e-23	1.09382	0.333	0.16	4.71701e-19	CC	Up
g517	1.36025e-68	1.94586	0.636	0.332	2.60297e-64	CC	Up
g51716	5.36467e-21	1.68924	0.336	0.181	1.02658e-16	CC	Up
g51746	1.7036e-06	-0.508035	0.294	0.412	0.0326	CC	Down
g51792	2.94707e-66	3.17866	0.261	0.064	5.63951e-62	CC	Up
g51966	5.22281e-14	1.04637	0.303	0.175	9.99437e-10	CC	Up
g51980	1.66357e-08	0.619399	0.327	0.216	0.000318341	CC	Up
g51982	9.59107e-06	0.7629	0.265	0.189	0.183535	CC	Up
g52130	2.20643e-08	0.726494	0.461	0.368	0.000422222	CC	Up
g52228	3.10487e-14	-1.09527	0.125	0.295	5.94148e-10	CC	Down	1.13947	0.000207807	0.0044072
g52268	1.5726e-11	-1.18768	0.123	0.263	3.00934e-07	CC	Down	1.03765	2.66515e-05	0.000889556
g5233	0.000276507	0.488278	0.379	0.316	1	CC	Up
g5238	4.7245e-23	-1.28061	0.186	0.427	9.0408e-19	CC	Down
g5240	3.18601e-66	-1.46047	0.434	0.753	6.09675e-62	CC	Down
g525	3.0436e-07	-0.480856	0.294	0.419	0.00582423	CC	Down
g5251	0.00149183	0.388388	0.285	0.226	1	CC	Up
g52522	1.59979e-14	-0.653634	0.476	0.634	3.06135e-10	CC	Down
g52527	3.72444e-75	-1.76901	0.353	0.737	7.12709e-71	CC	Down	1.13042	6.03549e-07	4.19379e-05
g52532	1.21798e-60	2.42149	0.265	0.069	2.33073e-56	CC	Up	-2.14371	0.00563374	0.0499315
g52539	3.79267e-34	1.4967	0.658	0.489	7.25766e-30	CC	Up
g5262	3.63063e-05	0.501878	0.3	0.221	0.694758	CC	Up
g5266	0.00196617	0.369185	0.752	0.71	1	CC	Up
g5271	1.55419e-25	-1.52115	0.134	0.378	2.9741e-21	CC	Down
g5274	6.85563e-06	0.564069	0.294	0.213	0.131189	CC	Up
g52761	3.10192e-30	-1.52224	0.149	0.425	5.93583e-26	CC	Down
g52794	8.43241e-08	0.855563	0.276	0.186	0.00161363	CC	Up	-1.96456	0.000829145	0.0122549
g52942	1.47954e-15	-1.02801	0.169	0.348	2.83125e-11	CC	Down
g53015	6.47581e-18	-1.50299	0.101	0.285	1.23921e-13	CC	Down	1.36446	1.0758e-12	4.51799e-10
g53064	1.42232e-14	-1.0445	0.09	0.253	2.72176e-10	CC	Down	1.23363	6.87582e-06	0.000305833
g53218	2.22538e-23	-1.31103	0.149	0.385	4.25849e-19	CC	Down
g53244	3.3329e-72	-1.54951	0.43	0.765	6.37784e-68	CC	Down
g53259	6.93305e-07	1.06404	0.325	0.247	0.0132671	CC	Up
g5334	1.00896e-05	-0.340831	0.583	0.685	0.193074	CC	Down
g53347	8.33573e-08	-0.649075	0.224	0.342	0.00159513	CC	Down
g53349	1.29847e-34	-1.58216	0.127	0.43	2.48474e-30	CC	Down
g53373	1.90134e-67	-1.45049	0.539	0.803	3.63841e-63	CC	Down	1.7063	7.27599e-08	7.14824e-06
g5341	3.84434e-103	-1.57397	0.831	0.941	7.35653e-99	CC	Down
g53566	8.71894e-05	0.46243	0.393	0.319	1	CC	Up
g53602	2.20937e-27	1.47811	0.41	0.217	4.22784e-23	CC	Up
g53642	0.00392521	0.647417	0.254	0.21	1	CC	Up
g53651	0.00101193	0.577887	0.279	0.223	1	CC	Up
g53657	6.38371e-05	0.377822	0.702	0.726	1	CC	Up
g53665	0.00164963	0.257712	0.254	0.193	1	CC	Up
g5367	4.54956e-124	2.47953	0.375	0.076	8.70603e-120	CC	Up
g53712	0.000379614	0.461955	0.25	0.184	1	CC	Up
g53721	4.78497e-46	-1.75766	0.167	0.52	9.15651e-42	CC	Down
g53745	2.38702e-13	-0.695435	0.243	0.417	4.56779e-09	CC	Down
g53795	0.0022411	0.465275	0.311	0.255	1	CC	Up
g53807	1.16225e-09	-0.931531	0.16	0.287	2.22407e-05	CC	Down
g53839	0.00188763	0.552355	0.314	0.255	1	CC	Up
g53904	9.4883e-13	0.974065	0.34	0.213	1.81568e-08	CC	Up
g53926	2.71837e-18	-1.96032	0.077	0.255	5.20187e-14	CC	Down
g53950	5.48571e-09	0.616106	0.395	0.283	0.000104975	CC	Up
g5396	4.86119e-22	0.892036	0.621	0.428	9.30237e-18	CC	Up
g53971	0.000305366	-0.385205	0.362	0.452	1	CC	Down
g53985	0.00765046	0.462222	0.353	0.308	1	CC	Up
g54001	0.00476125	0.763417	0.281	0.226	1	CC	Up
g54005	1.61616e-06	-0.374681	0.371	0.486	0.0309269	CC	Down
g54022	0.000161097	0.495311	0.507	0.452	1	CC	Up
g54026	0.00012269	0.479043	0.728	0.716	1	CC	Up
g5403	7.1325e-18	-1.03939	0.189	0.385	1.36488e-13	CC	Down
g54034	0.00297634	0.439177	0.265	0.211	1	CC	Up
g54038	1.1395e-10	1.24107	0.259	0.154	2.18055e-06	CC	Up
g54057	5.1623e-61	-1.50689	0.41	0.734	9.87858e-57	CC	Down
g54069	1.45947e-24	0.546602	0.969	0.982	2.79285e-20	CC	Up
g54075	2.60756e-20	-2.02734	0.064	0.255	4.98982e-16	CC	Down
g54081	5.99421e-07	-0.504701	0.211	0.322	0.0114705	CC	Down
g54082	1.58448e-46	-1.84094	0.197	0.545	3.03206e-42	CC	Down
g54109	3.36758e-34	-0.882682	0.307	0.61	6.44419e-30	CC	Down
g54136	2.45803e-09	-0.278862	0.717	0.84	4.70368e-05	CC	Down	-1.81011	3.32684e-10	7.39197e-08
g54170	2.29746e-08	1.20606	0.259	0.168	0.000439642	CC	Up
g54192	1.45049e-19	-2.36214	0.075	0.26	2.77566e-15	CC	Down
g54257	7.86689e-07	1.13882	0.289	0.209	0.0150541	CC	Up
g54260	3.76992e-07	0.740785	0.257	0.17	0.00721411	CC	Up
g54263	5.63007e-10	0.61856	0.482	0.364	1.07737e-05	CC	Up
g54278	8.97509e-21	1.20359	0.331	0.172	1.71747e-16	CC	Up
g54282	3.45695e-17	1.20569	0.289	0.152	6.61521e-13	CC	Up
g54286	6.31576e-14	0.647218	0.754	0.756	1.20858e-09	CC	Up
g54315	8.01957e-19	-1.15257	0.125	0.326	1.53462e-14	CC	Down
g54321	2.84613e-07	-0.665792	0.318	0.427	0.00544635	CC	Down
g5433	4.45493e-65	2.1355	0.318	0.09	8.52496e-61	CC	Up	-2.0016	3.20929e-10	7.21467e-08
g54337	1.50678e-42	2.24812	0.261	0.087	2.88337e-38	CC	Up
g54338	6.88631e-50	1.99717	0.726	0.572	1.31776e-45	CC	Up	-1.37581	0.00309314	0.0325116
g54340	8.57761e-101	-2.00119	0.425	0.799	1.64141e-96	CC	Down
g54344	2.03399e-10	-0.896385	0.349	0.49	3.89225e-06	CC	Down
g54346	3.1455e-15	-0.816771	0.292	0.476	6.01922e-11	CC	Down
g54350	1.72569e-85	-1.4848	0.634	0.874	3.30228e-81	CC	Down	1.74414	2.28976e-12	9.21134e-10
g54359	3.95856e-48	-1.61312	0.228	0.579	7.5751e-44	CC	Down
g54376	3.71072e-143	2.97267	0.594	0.181	7.10083e-139	CC	Up
g54377	1.57507e-55	1.39186	0.654	0.341	3.01406e-51	CC	Up
g54397	1.0128e-68	-1.5768	0.414	0.748	1.9381e-64	CC	Down
g54419	1.2433e-07	-2.9605	0.349	0.438	0.00237918	CC	Down
g54429	4.30183e-46	-1.60715	0.27	0.599	8.23199e-42	CC	Down	1.06335	6.51538e-06	0.000293642
g54430	4.11848e-12	0.754839	0.371	0.242	7.88112e-08	CC	Up
g54432	1.22749e-13	-0.954793	0.2	0.372	2.34892e-09	CC	Down	2.99994	0.00104436	0.0146034
g54437	3.49666e-49	1.70297	0.64	0.404	6.69121e-45	CC	Up
g5445	7.98889e-34	-1.78031	0.143	0.428	1.52875e-29	CC	Down
g54450	1.12342e-21	1.27517	0.34	0.173	2.14978e-17	CC	Up
g54461	2.12988e-05	0.343974	0.364	0.274	0.407573	CC	Up
g54463	1.47876e-15	0.438616	0.908	0.945	2.82976e-11	CC	Up
g54465	1.10718e-39	-1.43477	0.252	0.558	2.1187e-35	CC	Down	1.36034	2.56876e-07	2.03671e-05
g5449	1.74245e-10	0.674538	0.346	0.224	3.33436e-06	CC	Up
g5457	1.53337e-15	-0.890458	0.285	0.468	2.93425e-11	CC	Down
g54602	6.48526e-06	0.685313	0.48	0.406	0.124102	CC	Up
g54633	3.13928e-36	1.70927	0.362	0.157	6.00733e-32	CC	Up
g54657	2.49453e-59	2.0289	0.502	0.214	4.77352e-55	CC	Up	1.14775	0.0030742	0.0323923
g54658	3.25315e-129	3.18354	0.272	0.041	6.22524e-125	CC	Up
g54659	1.27915e-95	2.16752	0.636	0.249	2.44777e-91	CC	Up	1.17389	0.00508994	0.0465475
g54681	4.75488e-28	-1.75731	0.101	0.359	9.09895e-24	CC	Down
g54708	1.39728e-08	-0.644617	0.235	0.365	0.000267384	CC	Down
g54744	9.76623e-18	0.977832	0.489	0.337	1.86887e-13	CC	Up
g54751	1.30086e-13	-1.3853	0.118	0.269	2.48933e-09	CC	Down
g54755	9.55742e-27	1.66494	0.463	0.297	1.82891e-22	CC	Up
g54767	2.52657e-15	2.2221	0.27	0.148	4.83485e-11	CC	Up	2.36406	0.000186859	0.00404372
g54769	1.01298e-29	0.764994	0.509	0.269	1.93845e-25	CC	Up
g54778	0.00473774	0.635689	0.309	0.267	1	CC	Up
g54779	1.04388e-107	-1.78129	0.925	0.975	1.99757e-103	CC	Down	1.58551	1.12278e-06	7.11599e-05
g54780	2.13917e-12	-0.500476	0.162	0.333	4.09351e-08	CC	Down
g54784	1.54686e-08	0.479108	0.465	0.346	0.000296006	CC	Up
g54791	7.93952e-18	-1.31506	0.121	0.315	1.51931e-13	CC	Down
g54805	0.000756832	-0.270104	0.276	0.358	1	CC	Down
g54808	1.7798e-21	1.30425	0.298	0.144	3.40583e-17	CC	Up
g54832	2.99688e-06	0.786667	0.254	0.174	0.0573484	CC	Up
g54840	5.73978e-27	1.01992	0.594	0.4	1.09836e-22	CC	Up
g54844	4.08946e-22	1.29352	0.298	0.144	7.82559e-18	CC	Up
g54846	9.58656e-36	1.35067	0.379	0.162	1.83448e-31	CC	Up
g54847	3.14077e-76	1.76814	0.351	0.092	6.01018e-72	CC	Up
g54850	1.12193e-34	1.18525	0.579	0.335	2.14692e-30	CC	Up
g54852	3.44549e-10	0.683408	0.259	0.15	6.5933e-06	CC	Up
g54857	1.44465e-27	-1.78255	0.127	0.38	2.76449e-23	CC	Down
g54858	1.18432e-05	0.644356	0.491	0.437	0.226631	CC	Up
g54876	1.51497e-56	-1.39816	0.401	0.712	2.89904e-52	CC	Down
g54885	4.42605e-28	-1.163	0.246	0.513	8.46969e-24	CC	Down
g54890	6.40277e-09	0.869334	0.371	0.261	0.000122523	CC	Up
g54894	4.20146e-05	-0.30296	0.221	0.316	0.803991	CC	Down
g54895	0.000260686	0.530301	0.522	0.477	1	CC	Up
g54897	1.30162e-14	-0.989713	0.129	0.3	2.49078e-10	CC	Down
g54898	1.68829e-20	0.864018	0.399	0.225	3.23072e-16	CC	Up
g54917	6.24252e-16	-3.26859	0.189	0.345	1.19457e-11	CC	Down
g54953	1.20742e-163	3.17644	0.689	0.228	2.31051e-159	CC	Up
g54957	7.07849e-22	-1.6824	0.079	0.288	1.35454e-17	CC	Down
g54958	5.22528e-06	0.670744	0.487	0.406	0.0999909	CC	Up
g54964	2.04656e-101	-1.68193	0.871	0.953	3.91629e-97	CC	Down	1.66511	3.1702e-08	3.52196e-06
g54970	0.00895541	0.391426	0.292	0.249	1	CC	Up
g5499	3.07779e-23	1.09779	0.686	0.547	5.88966e-19	CC	Up
g54990	2.68472e-15	-0.869882	0.248	0.433	5.13749e-11	CC	Down
g55	3.09496e-22	-1.86516	0.072	0.281	5.92252e-18	CC	Down
g55009	1.42195e-14	0.89465	0.454	0.309	2.72105e-10	CC	Up
g55011	1.83829e-21	0.949522	0.434	0.26	3.51774e-17	CC	Up
g55015	1.35372e-16	0.325014	0.84	0.802	2.59047e-12	CC	Up
g55018	2.75539e-19	0.937056	0.493	0.317	5.27271e-15	CC	Up
g55036	9.55966e-06	0.264305	0.717	0.668	0.182934	CC	Up
g5504	0	6.02549	0.401	0.01	0	CC	Up
g55040	2.5498e-38	-0.973084	0.689	0.815	4.8793e-34	CC	Down	1.05657	0.00166545	0.0206467
g55047	1.58002e-21	-1.27768	0.175	0.401	3.02352e-17	CC	Down	1.04013	0.00375887	0.0373318
g55098	1.74045e-15	-1.03004	0.175	0.353	3.33052e-11	CC	Down
g55106	7.26296e-176	3.06941	0.397	0.065	1.38984e-171	CC	Up
g55107	1.33043e-15	1.08436	0.355	0.213	2.54592e-11	CC	Up
g55146	1.60144e-05	1.02629	0.325	0.26	0.306452	CC	Up
g55166	0.000322571	0.370419	0.748	0.77	1	CC	Up
g55181	6.41975e-29	1.74705	0.257	0.102	1.22848e-24	CC	Up
g55198	4.3797e-30	-1.71609	0.147	0.413	8.381e-26	CC	Down
g55206	4.15493e-08	0.680461	0.439	0.344	0.000795087	CC	Up
g55219	6.67287e-16	-1.01943	0.134	0.312	1.27692e-11	CC	Down	1.09513	2.53289e-06	0.000136722
g55220	4.94418e-05	0.492536	0.346	0.272	0.946118	CC	Up
g55222	1.48313e-19	-1.86673	0.101	0.29	2.83811e-15	CC	Down
g55227	6.80533e-95	1.82594	0.656	0.269	1.30227e-90	CC	Up
g55238	3.66474e-11	1.18255	0.351	0.228	7.01284e-07	CC	Up
g55286	4.40155e-49	1.99991	0.57	0.321	8.4228e-45	CC	Up
g55292	2.43146e-05	0.634046	0.263	0.19	0.465284	CC	Up
g55297	6.52306e-13	0.666382	0.684	0.575	1.24825e-08	CC	Up
g55304	8.78542e-55	1.64123	0.489	0.207	1.68118e-50	CC	Up
g55311	1.65261e-23	0.839636	0.632	0.466	3.16244e-19	CC	Up
g55329	6.51704e-105	3.51757	0.296	0.058	1.2471e-100	CC	Up
g55343	2.2046e-19	0.74598	0.732	0.623	4.21872e-15	CC	Up
g55549	1.07271e-211	4.37196	0.305	0.034	2.05273e-207	CC	Up	-1.0276	0.00122848	0.0164157
g5555	9.27e-16	-1.37216	0.103	0.271	1.77391e-11	CC	Down
g5556	4.29627e-25	1.17866	0.336	0.161	8.22134e-21	CC	Up
g5557	2.35828e-06	0.668337	0.257	0.179	0.045128	CC	Up
g5559	4.50735e-06	0.772635	0.399	0.325	0.0862526	CC	Up
g55594	1.19915e-27	1.05416	0.423	0.222	2.2947e-23	CC	Up
g55618	9.75937e-06	0.52973	0.41	0.319	0.186755	CC	Up
g55621	2.10517e-08	0.860779	0.355	0.254	0.000402845	CC	Up
g55622	3.65563e-43	-1.51574	0.221	0.559	6.99541e-39	CC	Down
g55654	1.07732e-05	0.570743	0.397	0.315	0.206155	CC	Up
g55669	0.000310988	0.595946	0.423	0.37	1	CC	Up
g55675	2.32593e-59	-1.3645	0.515	0.773	4.4509e-55	CC	Down
g55677	8.77309e-11	-0.768572	0.154	0.298	1.67882e-06	CC	Down
g55678	3.86538e-26	1.6238	0.257	0.105	7.39679e-22	CC	Up
g5570	5.69419e-23	1.29508	0.305	0.145	1.08964e-18	CC	Up	1.33021	0.000139943	0.00321212
g55713	3.71507e-12	1.07555	0.283	0.167	7.10916e-08	CC	Up
g55714	6.14347e-11	-0.474154	0.298	0.452	1.17561e-06	CC	Down
g5577	6.14644e-18	-1.21923	0.143	0.338	1.17618e-13	CC	Down
g55847	2.58003e-29	1.1785	0.717	0.622	4.93714e-25	CC	Up
g55871	2.71196e-14	0.362046	0.531	0.398	5.18961e-10	CC	Up	1.13949	0.00251505	0.0279656
g55874	6.29556e-12	0.944245	0.27	0.154	1.20472e-07	CC	Up
g55886	1.58032e-21	1.47707	0.311	0.159	3.02411e-17	CC	Up
g55953	0.00279626	0.501052	0.364	0.313	1	CC	Up
g55960	1.66564e-67	1.64925	0.772	0.546	3.18737e-63	CC	Up
g56003	5.18448e-05	0.61247	0.316	0.241	0.992103	CC	Up
g56005	8.84519e-34	2.19509	0.254	0.091	1.69262e-29	CC	Up
g56037	7.42946e-08	0.616583	0.658	0.599	0.0014217	CC	Up
g56140	0.00659682	0.72303	0.263	0.22	1	CC	Up
g56210	0.00300934	0.450611	0.3	0.241	1	CC	Up
g56225	0.000300635	0.557353	0.715	0.734	1	CC	Up
g56238	2.93434e-07	-0.433315	0.283	0.401	0.00561515	CC	Down
g56247	2.41015e-05	-0.271069	0.263	0.37	0.461207	CC	Down
g56269	4.14959e-16	-0.83564	0.215	0.408	7.94065e-12	CC	Down	1.12191	1.02658e-05	0.000421858
g56359	1.65113e-32	-2.46487	0.077	0.346	3.1596e-28	CC	Down
g56490	4.90087e-07	-0.313171	0.601	0.71	0.0093783	CC	Down
g56530	0.00099629	0.36919	0.296	0.233	1	CC	Up
g5655	4.46891e-36	1.62468	0.404	0.186	8.55171e-32	CC	Up
g5686	1.24233e-10	0.889826	0.377	0.259	2.37733e-06	CC	Up
g57015	1.77822e-27	-1.70499	0.127	0.379	3.4028e-23	CC	Down	1.29825	6.34898e-05	0.00176336
g57145	6.96665e-21	-1.55113	0.092	0.296	1.33314e-16	CC	Down
g57221	0.00115456	0.438824	0.443	0.399	1	CC	Up
g5724	7.6387e-15	1.02684	0.41	0.267	1.46174e-10	CC	Up
g573	1.59806e-18	-1.66378	0.07	0.251	3.05805e-14	CC	Down
g57381	9.05617e-09	0.60695	0.346	0.236	0.000173299	CC	Up
g57460	2.3946e-12	0.98794	0.327	0.2	4.58231e-08	CC	Up
g5752	1.53486e-64	-1.69379	0.36	0.704	2.93711e-60	CC	Down
g57577	7.78112e-32	1.37559	0.561	0.346	1.489e-27	CC	Up
g57652	4.1032e-23	1.27153	0.283	0.129	7.85187e-19	CC	Up
g57671	4.13416e-25	-1.61579	0.114	0.348	7.91113e-21	CC	Down
g577	3.23297e-05	0.710515	0.254	0.182	0.618661	CC	Up
g57705	1.44112e-17	1.27868	0.285	0.149	2.75773e-13	CC	Up
g57848	6.61092e-22	-1.54728	0.096	0.305	1.26506e-17	CC	Down
g57859	2.55611e-14	1.03384	0.327	0.195	4.89137e-10	CC	Up
g5789	4.56331e-43	-1.40603	0.254	0.582	8.73234e-39	CC	Down
g57930	4.24163e-18	-1.1281	0.134	0.329	8.11678e-14	CC	Down
g58036	3.53668e-22	-1.41586	0.149	0.367	6.7678e-18	CC	Down
g58060	2.07568e-91	-1.43525	0.614	0.919	3.97202e-87	CC	Down
g58068	3.51939e-08	0.753934	0.428	0.336	0.000673471	CC	Up
g58074	3.12752e-29	1.59054	0.649	0.463	5.98482e-25	CC	Up
g58132	1.21884e-05	0.774841	0.27	0.192	0.233238	CC	Up
g58139	1.97025e-20	0.823474	0.664	0.531	3.77027e-16	CC	Up
g58147	0.000981414	0.582683	0.651	0.643	1	CC	Up
g58187	7.47515e-08	-0.590928	0.184	0.308	0.00143045	CC	Down
g58240	2.18047e-29	-1.41967	0.158	0.419	4.17255e-25	CC	Down	1.02743	2.12898e-05	0.000745767
g58263	7.20326e-15	-0.769178	0.186	0.378	1.37842e-10	CC	Down
g58267	3.37726e-30	-1.84813	0.123	0.387	6.46273e-26	CC	Down	1.18423	1.44257e-06	8.66834e-05
g58317	1.9952e-10	0.896854	0.557	0.47	3.81801e-06	CC	Up
g58342	3.6689e-10	0.334506	0.368	0.238	7.02081e-06	CC	Up
g58356	3.7212e-52	1.92775	0.375	0.138	7.12089e-48	CC	Up
g58358	1.91869e-09	0.716834	0.351	0.237	3.67161e-05	CC	Up
g58360	1.4466e-13	-0.844998	0.184	0.352	2.76821e-09	CC	Down	2.2544	6.51181e-10	1.3452e-07
g58376	1.88075e-12	1.02546	0.583	0.492	3.599e-08	CC	Up
g58380	1.63423e-163	3.12859	0.401	0.071	3.12726e-159	CC	Up
g58471	5.03206e-42	1.72341	0.498	0.259	9.62935e-38	CC	Up
g58485	1.40959e-05	0.725886	0.36	0.284	0.269738	CC	Up
g58519	8.86823e-13	0.961776	0.539	0.468	1.69702e-08	CC	Up
g58521	1.4546e-62	-1.43496	0.485	0.766	2.78353e-58	CC	Down	1.62017	1.82653e-07	1.5308e-05
g58565	8.0476e-18	0.728633	0.719	0.629	1.53999e-13	CC	Up
g58640	1.47382e-06	0.584728	0.309	0.214	0.0282031	CC	Up
g58643	9.36629e-46	-0.942877	0.654	0.85	1.79233e-41	CC	Down
g58645	1.17551e-88	2.65921	0.3	0.066	2.24946e-84	CC	Up
g58651	5.53885e-06	0.328008	0.592	0.52	0.105991	CC	Up
g58662	4.84064e-16	0.956334	0.443	0.297	9.26306e-12	CC	Up
g58673	1.55845e-65	-1.43047	0.478	0.776	2.98225e-61	CC	Down
g58708	2.27558e-09	0.522638	0.338	0.22	4.35456e-05	CC	Up
g58751	2.60412e-18	0.57115	0.866	0.922	4.98325e-14	CC	Up
g58752	1.96368e-34	0.670628	0.864	0.812	3.7577e-30	CC	Up
g58757	3.33403e-276	4.56046	0.25	0.017	6.38e-272	CC	Up
g58765	4.49162e-53	2.70819	0.32	0.107	8.59516e-49	CC	Up
g58774	5.72288e-08	1.06678	0.333	0.247	0.00109513	CC	Up
g58779	0.00571772	0.335104	0.384	0.332	1	CC	Up	1.17099	3.49984e-07	2.66973e-05
g58786	1.30066e-22	-2.11388	0.081	0.292	2.48895e-18	CC	Down
g58792	0.00393358	0.411673	0.393	0.347	1	CC	Up
g58844	4.29592e-78	2.12559	0.579	0.25	8.22067e-74	CC	Up
g58875	2.01057e-92	-1.63352	0.765	0.922	3.84743e-88	CC	Down	1.62856	5.1682e-07	3.68494e-05
g58887	3.04189e-18	1.88898	0.336	0.199	5.82096e-14	CC	Up
g58903	1.07643e-23	-1.36839	0.162	0.393	2.05985e-19	CC	Down
g58905	0.000188933	0.269872	0.333	0.258	1	CC	Up
g58913	3.86114e-177	3.77364	0.482	0.1	7.38868e-173	CC	Up
g58915	2.64528e-11	-1.18786	0.116	0.252	5.06201e-07	CC	Down
g58953	2.97935e-48	2.27731	0.366	0.145	5.70128e-44	CC	Up	1.50531	0.000883221	0.012865
g58960	1.40489e-222	3.59262	0.759	0.213	2.6884e-218	CC	Up	1.05895	0.0023049	0.0262161
g58982	1.06308e-98	-1.54634	0.719	0.912	2.03432e-94	CC	Down	1.02803	1.17984e-07	1.06848e-05
g58990	6.90269e-23	-1.5029	0.11	0.331	1.3209e-18	CC	Down
g58992	1.6553e-17	0.853728	0.388	0.228	3.16757e-13	CC	Up
g59	3.90486e-33	-2.04504	0.116	0.4	7.47233e-29	CC	Down
g59012	5.43078e-27	-2.01424	0.11	0.348	1.03923e-22	CC	Down
g59035	1.12968e-45	-1.88849	0.171	0.514	2.16175e-41	CC	Down
g59048	4.30907e-29	1.13794	0.454	0.243	8.24583e-25	CC	Up
g59089	4.25711e-21	1.07457	0.404	0.233	8.1464e-17	CC	Up
g59093	5.34186e-76	-1.48363	0.522	0.808	1.02222e-71	CC	Down
g59096	5.39239e-21	-1.72916	0.105	0.31	1.03189e-16	CC	Down	1.75917	8.29755e-07	5.50534e-05
g59115	3.37989e-05	-0.448795	0.175	0.26	0.646775	CC	Down
g59143	3.95833e-08	-1.09574	0.221	0.345	0.000757465	CC	Down	1.08625	2.30611e-14	1.39893e-11
g59147	5.32785e-38	1.32787	0.746	0.556	1.01954e-33	CC	Up
g59148	7.8487e-47	1.76833	0.298	0.098	1.50193e-42	CC	Up	1.43752	0.000753205	0.0114774
[truncated: 14,888 more rows]

## Sheet: Table S3B
Table S3B Virus induced-differentially express genes (DEGs) in JHY vs VF-JHY
gene_id	BaseMean_DESeq2	BaseMean_control_JHY	BaseMean_case_VF_JHY	FoldChange	log2FoldChange	p-value	q-value
g10004	110.854	46.0135	175.695	3.81311	-1.93097	3.06614e-10	6.93482e-08
g10012	487.777	665.371	310.183	0.466118	1.10123	0.000165181	0.00365319
g10028	27.9399	2.21295	53.6668	24.7581	-4.62983	4.04958e-09	6.58565e-07
g10031	1608.32	951.123	2265.52	2.38189	-1.25211	1.40764e-05	0.000537959
g10040	5645.57	3633.09	7658.06	2.10785	-1.07577	0.000145656	0.00331341
g10066	941.648	445.488	1437.81	3.22793	-1.69061	5.68326e-05	0.00162208
g1011	1481.09	628.42	2333.76	3.7141	-1.89301	0.000293867	0.00568048
g1012	29.8507	7.20489	52.4965	7.24133	-2.85625	5.73833e-05	0.00163414
g10170	20.1057	4.71924	35.4921	7.57254	-2.92078	0.00238932	0.0269518
g10204	30.4026	53.8603	6.94494	0.128392	2.96137	0.00380512	0.0376444
g10206	559.767	349.997	769.536	2.19955	-1.13721	1.23866e-05	0.000489534
g1030	32.0527	49.1402	14.9653	0.304724	1.71442	0.00221005	0.0253638
g10443	2059.35	835.841	3282.86	3.92783	-1.97373	7.27428e-05	0.00196328
g10456	17.9019	4.37626	31.4276	7.21911	-2.85182	0.00518585	0.047165
g10464	93.6093	51.6144	135.604	2.62621	-1.39298	0.00158398	0.0199063
g10487	412.267	241.202	583.333	2.41807	-1.27385	8.60944e-09	1.17931e-06
g10534	590.461	348.281	832.641	2.39175	-1.25807	0.000461413	0.00802267
g10541	1696.16	1072.4	2319.91	2.16365	-1.11347	6.95712e-05	0.00189821
g10618	8.65994	17.3199	0	0.0114203	6.45225	2.37181e-05	0.000812947
g1062	10.9608	1.8156	20.106	10.9957	-3.45887	0.000238756	0.00488466
g10623	212.162	285.713	138.611	0.48512	1.04359	9.06693e-05	0.00229938
g1065	3481.75	2152.1	4811.4	2.23576	-1.16076	5.5214e-07	3.86468e-05
g1069	2342.43	544.422	4140.43	7.60599	-2.92714	5.30556e-07	3.76882e-05
g10719	96.1916	12.2935	180.09	14.6632	-3.87413	7.07556e-09	1.01276e-06
g10724	110.18	19.5517	200.808	10.283	-3.36219	7.81949e-05	0.00206522
g10737	473.074	314.516	631.632	2.00918	-1.00661	2.42248e-08	2.77186e-06
g1075	287.104	443.812	130.395	0.293692	1.76762	1.84679e-08	2.24774e-06
g1080	119.841	33.5692	206.113	6.1449	-2.61939	0.000410693	0.0073309
g10809	44.8598	23.8246	65.8949	2.76602	-1.46781	0.00219989	0.0253003
g10865	70.2552	41.6813	98.829	2.37584	-1.24844	0.00115124	0.0156796
g1089	212.958	108.171	317.745	2.93865	-1.55515	0.00105087	0.0146627
g1094	1787.87	584.125	2991.61	5.12203	-2.35672	7.92496e-06	0.000341068
g1097	328.271	212.747	443.796	2.08573	-1.06055	0.00117658	0.0159417
g10997	166.812	58.177	275.446	4.73924	-2.24466	2.03227e-09	3.73401e-07
g1101	189.652	61.8339	317.471	5.13559	-2.36053	0.000627514	0.0101018
g1102	99.2323	147.815	50.6501	0.342328	1.54655	0.00474256	0.0442388
g11047	15.592	1.86997	29.314	15.8652	-3.98779	2.23177e-06	0.000123971
g1105	153.262	54.9541	251.57	4.5831	-2.19632	1.75494e-09	3.28767e-07
g11137	765.402	494.854	1035.95	2.09379	-1.06612	0.000612104	0.0099122
g11229	90.0246	55.7689	124.28	2.22762	-1.1555	0.00554466	0.0494339
g1123	3274.25	5082.82	1465.69	0.288371	1.794	8.77052e-09	1.18859e-06
g11276	316.627	509.143	124.112	0.243667	2.03702	1.76005e-06	0.00010238
g11288	252.736	167.238	338.235	2.02299	-1.01649	0.00336341	0.034498
g1137	131.974	246.05	17.8988	0.0727328	3.78125	5.9045e-08	5.98185e-06
g11402	34.2445	7.81498	60.6741	7.78226	-2.96019	0.00426514	0.040843
g1143	440.089	284.13	596.048	2.097	-1.06833	0.00117788	0.0159459
g11454	143.379	53.4538	233.304	4.36446	-2.1258	0.00348813	0.0353785
g11503	65.2814	5.23423	125.329	23.9602	-4.58257	9.11908e-05	0.00230797
g11515	113.315	53.2481	173.382	3.25476	-1.70255	0.000798094	0.0119377
g11565	217.777	142.36	293.193	2.05962	-1.04238	0.0021305	0.0247481
g11568	670.172	349.955	990.388	2.82994	-1.50077	9.44692e-06	0.000392427
g11637	16.6229	31.0816	2.1642	0.0692277	3.85251	4.69236e-05	0.0013837
g11639	16.9241	31.6962	2.15199	0.0677688	3.88323	0.000284403	0.00553978
g11641	50.4677	97.667	3.26843	0.0332124	4.91214	5.08162e-09	7.83082e-07
g11686	2172.03	1366.16	2977.91	2.1799	-1.12426	3.45946e-06	0.000176046
g11695	342.445	195.341	489.549	2.50741	-1.3262	1.80082e-06	0.000104434
g1172	56312.9	37150.5	75475.2	2.03162	-1.02263	1.07756e-07	1.00197e-05
g11811	88.9408	124.16	53.7214	0.432595	1.20891	1.61238e-05	0.000602349
g11812	721.259	1009.24	433.281	0.429424	1.21952	0.000155681	0.00349231
g11817	224.459	329.188	119.73	0.36399	1.45803	6.10404e-06	0.000278707
g1183	79.4759	110.22	48.7315	0.441728	1.17877	0.00111751	0.0153537
g11830	175.272	244.113	106.431	0.43599	1.19763	9.58844e-05	0.00240132
g11866	12191.6	7898.65	16484.5	2.08702	-1.06144	1.61312e-06	9.54311e-05
g11886	678.337	361.559	995.115	2.75289	-1.46095	0.000896842	0.0130322
g11930	248.652	358.918	138.386	0.385712	1.37441	2.64909e-05	0.000885743
g12023	2832.1	1756.1	3908.1	2.22561	-1.1542	1.43979e-13	7.24007e-11
g12065	13.8242	0.316586	27.3319	82.9449	-6.37408	4.9523e-06	0.000236577
g12068	7517.52	3045.38	11989.7	3.93708	-1.97713	0.00037237	0.00679274
g12074	236.707	136.639	336.775	2.46696	-1.30274	1.94712e-07	1.60373e-05
g12081	15.973	26.2624	5.68354	0.217156	2.20319	0.00116617	0.0158321
g12150	253.103	99.0311	407.174	4.11672	-2.04149	1.43787e-15	1.27793e-12
g12183	3046.84	1869.54	4224.15	2.25953	-1.17602	0.00113836	0.0155652
g12203	165.369	278.15	52.5882	0.188999	2.40355	2.95386e-06	0.000154853
g12204	10.8018	19.8218	1.7818	0.0898985	3.47556	0.00235555	0.0266495
g12223	112.999	64.3789	161.62	2.5097	-1.32752	0.000920056	0.0132786
g12241	1072.46	1590.31	554.604	0.34876	1.51969	0.000239715	0.00489903
g12245	897.716	455.486	1339.95	2.94251	-1.55705	1.8665e-08	2.26451e-06
g12274	110.321	64.4996	156.143	2.42204	-1.27622	0.00508151	0.046515
g12289	255.621	81.7477	429.494	5.25751	-2.39438	0.00120149	0.0161866
g12302	1440.87	770.633	2111.11	2.73959	-1.45396	0.000281748	0.0055049
g12308	42.9677	20.1644	65.771	3.26878	-1.70875	0.00223913	0.0256282
g12323	56.3775	28.3203	84.4348	2.98747	-1.57892	2.95183e-06	0.000154853
g12343	80.908	44.0155	117.801	2.67725	-1.42075	0.00118308	0.0160068
g12351	6338.35	180.584	12496.1	69.2046	-6.1128	2.09879e-05	0.000736544
g12361	62.7262	36.1664	89.286	2.47387	-1.30677	0.000425395	0.007537
g12369	104.629	21.2836	187.975	8.85074	-3.1458	1.52534e-05	0.000577739
g12377	2837.26	3976.17	1698.34	0.427105	1.22734	6.21559e-05	0.00173514
g12381	51.7232	18.263	85.1833	4.67073	-2.22365	0.000382037	0.0069163
g12410	28.4866	40.5155	16.4577	0.406014	1.3004	0.00530482	0.0478711
g12421	24.1685	4.02068	44.3163	11.0596	-3.46723	2.77841e-05	0.000918312
g12445	24.9008	3.71039	46.0912	12.4742	-3.64087	2.93681e-05	0.000957645
g12449	214.13	301.476	126.785	0.420348	1.25034	0.00366237	0.0366209
g1246	33.2168	15.9897	50.444	3.15605	-1.65812	0.0009448	0.0135254
g12476	73.0713	46.3504	99.7921	2.1551	-1.10775	0.000148902	0.0033772
g12478	9.75425	18.4338	1.07472	0.0583145	4.1	0.000126209	0.00296473
g1249	326.268	469.991	182.545	0.388591	1.36368	6.71443e-05	0.00184403
g12509	2949.39	1958.47	3940.31	2.01198	-1.00862	1.8675e-13	9.04137e-11
g12532	11.6916	1.47104	21.9122	14.5468	-3.86263	0.000163614	0.00362744
g12583	231.054	79.1326	382.976	4.84591	-2.27677	1.04355e-12	4.43125e-10
g12594	356.251	492.693	219.808	0.44627	1.16401	0.00149191	0.0190117
g12607	196.406	118.714	274.097	2.31163	-1.20891	1.79953e-05	0.000653731
g12624	205.873	130.457	281.289	2.15756	-1.1094	0.000210181	0.00444767
g12630	267.858	95.7319	439.984	4.59971	-2.20154	5.46778e-07	3.84829e-05
g12633	2696.37	1736.3	3656.43	2.10596	-1.07448	1.61569e-07	1.39699e-05
g12645	197.98	66.3329	329.627	4.96635	-2.31219	6.89818e-06	0.000305833
g12646	40.1498	19.2811	61.0184	3.1655	-1.66243	0.00164597	0.0204632
g12654	181.406	306.964	55.8484	0.182021	2.45782	2.62143e-07	2.0699e-05
g12760	64.3788	87.4041	41.3535	0.473556	1.07839	0.00370181	0.0369376
g12791	43.2344	24.2188	62.2499	2.56938	-1.36142	0.00127446	0.016906
g12792	3.9521	0	7.9042	46.721	-5.546	0.00119149	0.0161072
g12795	12.9129	3.10834	22.7175	7.3458	-2.87692	0.00237866	0.0268712
g12800	43.1839	6.96331	79.4045	11.4488	-3.51712	0.00299242	0.0318112
g12803	38.5269	6.0457	71.0082	11.6704	-3.54478	3.0823e-09	5.2605e-07
g12804	26.8149	8.30042	45.3294	5.46506	-2.45024	0.000509984	0.00862774
g12805	91.5478	6.79826	176.297	25.9929	-4.70005	1.48588e-09	2.83929e-07
g12807	5.20709	0	10.4142	61.5645	-5.94403	0.000422789	0.00750476
g12825	178.533	102.008	255.059	2.501	-1.3225	0.0002418	0.00491458
g12838	1778.87	656.956	2900.78	4.41556	-2.1426	2.36322e-05	0.000811459
g12853	3.59856	0	7.19713	42.5342	-5.41055	0.00220748	0.0253495
g12855	1900.75	661.648	3139.85	4.74504	-2.24642	2.02633e-09	3.73401e-07
g12859	161.447	264.024	58.8701	0.222934	2.16531	2.91217e-05	0.000952047
g12896	981.356	465.59	1497.12	3.21614	-1.68533	3.96327e-06	0.000194935
g1290	1433.33	918.934	1947.72	2.11996	-1.08404	1.64307e-08	2.01908e-06
g12900	3.9348	0	7.8696	46.5384	-5.54035	0.00310043	0.0325341
g12915	106.012	39.2396	172.784	4.39151	-2.13472	2.07232e-07	1.69227e-05
g12921	9.96036	0.6052	19.3155	31.6158	-4.98257	5.79194e-05	0.00164
g12922	44.917	0.633172	89.2008	144.664	-7.17656	1.01594e-08	1.3594e-06
g12923	23.4928	3.04767	43.9379	14.3671	-3.84469	4.18882e-08	4.44678e-06
g12924	199.992	30.5863	369.397	12.0467	-3.59057	4.00121e-10	8.78817e-08
g12925	101.234	16.3908	186.077	11.3815	-3.50862	9.85935e-05	0.00245629
g1296	686.698	434.609	938.787	2.15999	-1.11103	6.25195e-05	0.00174275
g13051	104.588	48.0384	161.138	3.35937	-1.74819	0.00137662	0.0178581
g13053	149.079	93.2511	204.907	2.19841	-1.13646	0.00265474	0.0290623
g1306	2575.66	904.793	4246.53	4.69368	-2.23072	1.00666e-10	2.65588e-08
g13091	2090.61	748.284	3432.95	4.58698	-2.19754	1.3658e-08	1.73766e-06
g13093	718.082	332.938	1103.23	3.31242	-1.72789	0.000102879	0.00253378
g13094	1073.83	281.078	1866.59	6.63825	-2.7308	2.55302e-07	2.03143e-05
g13096	462.19	203.679	720.7	3.53657	-1.82235	1.74026e-09	3.27623e-07
g13098	1052.3	455.236	1649.36	3.6225	-1.85698	7.1572e-05	0.00193991
g13099	373.852	125.352	622.352	4.95946	-2.31018	1.24471e-10	3.15027e-08
g13100	319.102	149.313	488.891	3.27432	-1.71119	9.38829e-13	4.05585e-10
g13101	38.2089	11.3727	65.045	5.68137	-2.50624	1.03345e-05	0.000423771
g13102	1163.07	580.471	1745.68	3.0067	-1.58818	0.000279722	0.0054765
g13103	9.55339	3.02128	16.0855	5.29262	-2.40398	0.00472379	0.044096
g13104	577.298	169.097	985.498	5.8276	-2.5429	1.2888e-05	0.00050332
g13105	81.8066	7.84538	155.768	19.7822	-4.30613	0.00390685	0.0383644
g13106	2138.2	705.845	3570.55	5.05764	-2.33846	3.49679e-06	0.000176302
g1311	271.394	114.022	428.767	3.76259	-1.91173	0.00106826	0.0148453
g13132	208.747	334.807	82.6883	0.246741	2.01893	1.33912e-05	0.000516421
g13156	329.159	184.048	474.27	2.57802	-1.36626	0.000202512	0.00432127
g13177	88.2319	43.9964	132.467	3.00864	-1.58911	7.03663e-05	0.00191674
g13181	21.4451	34.6639	8.22632	0.237265	2.07543	0.00185601	0.0223335
g13183	513.227	341.26	685.195	2.00787	-1.00566	1.12806e-05	0.000452373
g13223	302.862	463.628	142.095	0.306523	1.70593	2.08615e-07	1.69919e-05
g13232	1429.87	745.433	2114.31	2.83628	-1.504	4.01399e-05	0.00121267
g13236	111.67	170.916	52.4234	0.30678	1.70472	4.64395e-05	0.00137716
g13240	10.0379	17.5599	2.51583	0.14278	2.80814	0.00185338	0.0223088
g13258	228.653	109.423	347.882	3.17894	-1.66855	5.76446e-08	5.87468e-06
g13259	19.2103	2.84297	35.5775	12.7128	-3.6682	6.29894e-06	0.000286238
g13263	431.461	227.217	635.705	2.79906	-1.48494	2.98977e-05	0.000969413
g13264	1108.16	442.604	1773.71	4.00789	-2.00284	1.49248e-07	1.30224e-05
g13266	2708.42	4668.7	748.137	0.160239	2.6417	9.85183e-07	6.33851e-05
g13276	981.952	351.952	1611.95	4.58032	-2.19545	6.5102e-06	0.000293642
g13296	39.9204	7.97949	71.8614	9.0063	-3.17093	0.00164439	0.0204503
g13325	107.718	25.3632	190.074	7.49685	-2.90628	0.00243265	0.0273196
g13351	25.8767	1.23522	50.5181	41.0439	-5.3591	0.000216673	0.00453235
g13381	1925.93	1080.5	2771.37	2.56485	-1.35887	4.00463e-06	0.000196211
g13382	245.826	92.8703	398.782	4.29535	-2.10278	3.17789e-05	0.00101973
g13389	317.996	146.299	489.694	3.34811	-1.74335	0.00365741	0.0365904
g13406	381.228	238.587	523.868	2.19689	-1.13547	0.0044252	0.041968
g13422	109.934	20.1347	199.734	9.91592	-3.30975	0.000395237	0.00710145
g13424	500.434	181.47	819.397	4.51606	-2.17506	7.57757e-05	0.00201666
g13433	106.883	43.2676	170.499	3.94115	-1.97862	0.000257538	0.00516115
g13442	289.351	89.684	489.019	5.45605	-2.44786	3.409e-05	0.00107849
g13443	38.7621	11.9005	65.6237	5.51014	-2.46209	1.43105e-06	8.61267e-05
g13445	38.1673	6.78131	69.5534	10.2795	-3.3617	3.90748e-08	4.17129e-06
g13466	76.8224	39.9827	113.662	2.84642	-1.50915	0.00201295	0.0237215
g13467	512.292	339.607	684.977	2.01774	-1.01274	0.000474568	0.00818759
g13475	17.7802	4.60263	30.9578	6.72809	-2.7502	3.60584e-05	0.00112493
g13520	233.925	348.851	119	0.340965	1.55231	0.00279103	0.030191
g13564	78476	43022.5	113930	2.64815	-1.40499	8.32299e-08	7.99195e-06
g13583	405.869	618.451	193.287	0.312464	1.67824	0.000192724	0.00414716
g13601	52.9753	22.903	83.0475	3.63654	-1.86257	6.91729e-05	0.00189097
g13657	430.527	612.412	248.642	0.405871	1.30091	6.66746e-06	0.000298373
g1366	846.04	1259.97	432.105	0.34293	1.54402	3.7687e-06	0.000187537
g1373	118.753	43.7808	193.726	4.428	-2.14666	3.61436e-07	2.72984e-05
g13732	1081.32	253.029	1909.6	7.5463	-2.91577	1.3686e-08	1.73766e-06
g13760	6.90529	0.316586	13.494	40.9252	-5.35492	0.00336102	0.0344835
g13762	221.45	22.3983	420.501	18.763	-4.22982	0.00012425	0.00292934
g13771	106.605	1.89636	211.314	112.099	-6.80863	0.000110265	0.00267555
g13774	15.3244	0.316586	30.3322	92.0204	-6.52388	8.82076e-05	0.00225336
g13796	158.724	81.5211	235.927	2.89608	-1.5341	3.94729e-05	0.00120011
g13820	198.396	286.87	109.922	0.383161	1.38398	0.000931381	0.0133915
g13861	2972.05	1798.1	4146	2.30585	-1.2053	1.49139e-05	0.000566003
g13875	307.027	61.7383	552.315	8.94541	-3.16115	0.00303738	0.0321461
g13876	41.749	60.9411	22.557	0.369692	1.4356	0.000683312	0.0107201
g13905	141.062	69.98	212.144	3.03049	-1.59955	0.000214809	0.00451825
g13906	142.809	39.8776	245.74	6.15869	-2.62262	0.000101251	0.00250615
g13909	9.26482	17.4697	1.05997	0.0611398	4.03174	0.000598722	0.00974919
g13917	215.857	288.48	143.234	0.496436	1.01032	0.0047296	0.0441395
g13921	6.8135	12.551	1.076	0.0856491	3.54542	0.00514243	0.0468594
g13922	1784.1	2524.64	1043.56	0.413384	1.27445	9.9757e-07	6.39667e-05
g13925	7.47361	0	14.9472	88.4241	-6.46637	0.000103506	0.00254549
g13940	113.523	69.8376	157.209	2.25117	-1.17068	0.00107022	0.0148567
g1398	33.1536	61.7029	4.60424	0.0747957	3.7409	0.000885749	0.0128906
g13991	153.16	47.8947	258.425	5.39687	-2.43212	1.93462e-09	3.58909e-07
g14003	504.992	723.967	286.018	0.395031	1.33996	5.26821e-06	0.00024795
g14015	476.543	119.851	833.236	6.95319	-2.79768	7.7924e-11	2.14246e-08
g14030	533.825	775.599	292.052	0.376583	1.40896	0.00108776	0.0150455
g14040	27162.1	37021.4	17302.9	0.467375	1.09735	1.29542e-08	1.66131e-06
g14052	39.8646	12.4952	67.234	5.40623	-2.43462	0.000174003	0.00380862
g14054	47.8543	10.8753	84.8334	7.83416	-2.96978	1.06096e-06	6.73531e-05
g14055	25.7566	0	51.5132	304.627	-8.2509	1.01606e-09	2.02244e-07
g14084	274.386	507.687	41.0847	0.0808803	3.62807	1.62149e-06	9.56304e-05
g14085	9.4943	18.6344	0.354172	0.0206238	5.59955	0.00217227	0.0250582
g14087	54.9193	101.277	8.56193	0.0845609	3.56386	2.99065e-05	0.000969413
g14093	1393.78	570.262	2217.3	3.88851	-1.95922	4.16252e-07	3.04895e-05
g14097	22.5515	8.17159	36.9314	4.49623	-2.16872	7.92276e-05	0.00208385
g14099	193.768	111.444	276.091	2.48027	-1.3105	3.82739e-08	4.12031e-06
g14101	61.8029	104.742	18.8639	0.180187	2.47244	8.16253e-05	0.00212354
g1413	263.078	105.971	420.186	3.96655	-1.98789	2.6556e-05	0.000887143
g14130	199.789	85.2141	314.365	3.6901	-1.88366	0.00210685	0.0245705
g14135	102.815	41.5192	164.111	3.95631	-1.98416	0.000733488	0.0112785
g1414	75.9032	26.2288	125.578	4.79641	-2.26196	0.000465847	0.00808052
g14182	41.4053	22.4343	60.3763	2.69265	-1.42903	0.000724535	0.0111871
g14244	97.9514	35.1282	160.775	4.57537	-2.19389	0.00109486	0.0151219
g14257	131.981	44.5154	219.447	4.92992	-2.30156	0.000307174	0.00586377
g14270	44.6531	20.7348	68.5713	3.3016	-1.72316	3.41349e-05	0.00107902
g14302	480.099	196.988	763.211	3.87628	-1.95467	3.58135e-07	2.71503e-05
g14306	81.0281	32.5255	129.531	3.98418	-1.99428	1.62928e-09	3.09782e-07
g14337	207.45	297.929	116.97	0.392466	1.34936	3.30343e-05	0.00105206
g14370	150.318	231.45	69.1861	0.29873	1.74309	5.7756e-06	0.000266577
g14374	121.885	40.4998	203.271	5.02779	-2.32992	1.09065e-05	0.000440608
g14410	72.6071	104.414	40.8003	0.390391	1.35701	0.00028673	0.00557373
g14467	4.45592	0.316586	8.59525	26.0943	-4.70566	0.00312926	0.0327109
g14482	391.946	239.709	544.182	2.27148	-1.18363	7.50249e-09	1.05802e-06
g14488	39.6924	14.6753	64.7096	4.40714	-2.13984	0.00078205	0.0117807
g14527	111.116	64.5604	157.671	2.44097	-1.28746	0.00176497	0.0215089
g14530	12.1297	2.50314	21.7562	8.74828	-3.129	0.00535373	0.048176
g14551	75.4696	122.976	27.9634	0.227261	2.13758	0.000102897	0.00253378
g1458	258.732	158.933	358.531	2.25686	-1.17432	0.00449814	0.0425469
g14626	10.4606	1.86997	19.0511	10.2861	-3.36262	0.000362773	0.0066815
g14633	2165.74	1285.88	3045.61	2.3688	-1.24416	2.41941e-09	4.26095e-07
g14649	223.216	306.162	140.27	0.458098	1.12627	0.00192607	0.0229382
g14653	50.4928	74.12	26.8656	0.361991	1.46597	0.000637465	0.010219
g14655	298.4	194.771	402.029	2.06425	-1.04562	0.000107896	0.00263205
g14819	2008.23	2895.91	1120.54	0.386971	1.3697	2.80517e-11	8.64559e-09
g1496	121.513	195.512	47.5138	0.242937	2.04134	0.00142691	0.0183302
g1497	202.656	331.557	73.7557	0.222388	2.16885	0.00316361	0.033003
g1498	13.7972	24.3286	3.26588	0.133285	2.90741	0.000695992	0.0108566
g14996	66.6123	89.9662	43.2584	0.481212	1.05526	0.00254449	0.0282109
g15022	11.0958	1.86367	20.3279	10.9842	-3.45736	0.00122235	0.016373
g15140	10.8724	18.5219	3.2229	0.173808	2.52444	0.00225462	0.0257382
g15280	92.4554	22.6918	162.219	7.14771	-2.83748	0.000270165	0.00533311
g15335	39.5122	14.2902	64.7342	4.51857	-2.17587	2.10584e-05	0.00073834
g15343	58.1695	91.7756	24.5633	0.267715	1.90123	0.00115868	0.0157697
g1542	112.841	38.3391	187.343	4.88825	-2.28932	0.00111553	0.0153409
g1546	569.735	794.08	345.391	0.435024	1.20083	8.4112e-06	0.000356376
g15460	176.042	247.018	105.066	0.425635	1.23231	0.000768359	0.0116479
g15496	162.17	76.3157	248.025	3.25427	-1.70234	0.000678449	0.0106745
g15505	25.5052	41.3219	9.68854	0.234095	2.09483	0.000369042	0.0067514
g15506	140.203	260.606	19.7999	0.0758359	3.72097	1.26194e-15	1.14827e-12
g15521	212.469	298.205	126.733	0.425116	1.23407	0.000763615	0.011599
g15608	19.4144	38.8287	0	0.00508962	7.61823	4.66598e-09	7.30819e-07
g15610	1270.92	529.205	2012.63	3.8035	-1.92733	2.69428e-06	0.000143409
g15626	70.0646	30.5365	109.593	3.59919	-1.84767	0.000228447	0.00471922
g15696	280.571	157.456	403.686	2.56355	-1.35814	4.5194e-07	3.25269e-05
g15760	94.9082	133.376	56.4401	0.423535	1.23945	2.49994e-05	0.000846237
g15768	2026.44	1176.62	2876.27	2.44467	-1.28964	1.63736e-05	0.000609299
g15791	4.29152	0	8.58304	50.7611	-5.66565	0.000669339	0.0105922
g15852	31.8645	10.5307	53.1983	5.06377	-2.34021	0.000685722	0.0107458
g15856	65.9041	4.27975	127.528	29.7839	-4.89646	1.28617e-11	4.27423e-09
g15889	824.799	1296	353.603	0.272811	1.87402	1.04661e-07	9.8035e-06
g15919	252.157	478.158	26.1552	0.0546948	4.19245	0.000687854	0.0107737
g15921	495.816	985.765	5.86767	0.00594613	7.39383	0.00151486	0.0192232
g15922	5152.09	9931.15	373.031	0.0375615	4.7346	0.00277434	0.030053
g15925	21.5741	41.3787	1.76959	0.0430031	4.53942	2.61672e-05	0.000879537
g15930	67.6707	105.948	29.3936	0.277107	1.85148	0.000241368	0.00491458
g15932	622.051	343.178	900.923	2.62408	-1.39181	0.000120478	0.00286694
g15940	143.224	269.363	17.0852	0.0634568	3.97808	1.01341e-06	6.48733e-05
g16020	27.2626	4.89439	49.6309	10.1336	-3.34107	3.84621e-06	0.000190897
g16026	65.0711	104.997	25.1453	0.239139	2.06408	0.000477342	0.00822109
g16053	669.666	324.735	1014.6	3.12471	-1.64372	1.74956e-05	0.000638615
g1606	50.0119	12.8686	87.1551	6.72645	-2.74985	3.12397e-07	2.40703e-05
g16111	136.113	75.9618	196.265	2.58636	-1.37092	9.37403e-08	8.91162e-06
g16114	208.129	91.0802	325.177	3.57202	-1.83674	0.00172257	0.0211066
g1613	321.12	63.6694	578.571	9.08742	-3.18387	0.00421373	0.0405224
g16137	39.1867	57.5948	20.7785	0.360753	1.47092	0.00138398	0.0179355
g16157	50.0026	30.7147	69.2905	2.25904	-1.17571	0.0012335	0.0164564
g16199	110.264	168.988	51.5398	0.305209	1.71213	0.00232884	0.0264413
g162	379.708	157.072	602.343	3.83607	-1.93963	7.69976e-06	0.000333252
g16219	11.2926	1.52384	21.0613	13.7739	-3.78386	0.000800449	0.0119542
g16244	249.712	86.5546	412.869	4.77325	-2.25497	0.000486353	0.00834244
g16260	288.752	520.228	57.2759	0.110078	3.1834	2.8384e-13	1.3392e-10
g1628	11.7142	19.8674	3.56105	0.179712	2.47624	0.00217071	0.0250477
g16287	454.405	809.866	98.9442	0.122182	3.0329	4.08657e-13	1.88164e-10
g16295	2537.85	1319.9	3755.81	2.84587	-1.50887	1.69476e-10	4.23326e-08
g16297	731.134	1177.38	284.886	0.241949	2.04722	1.08202e-05	0.000438567
g1648	1023.76	471.544	1575.98	3.34236	-1.74087	1.00928e-13	5.35716e-11
g16493	110.406	147.337	73.4746	0.498303	1.0049	8.55147e-05	0.00219631
g16494	203.546	339.893	67.1989	0.19762	2.3392	0.000196148	0.00421607
g16511	72.6904	27.9889	117.392	4.20041	-2.07053	0.00161114	0.0201746
g16523	12.9123	3.04767	22.777	7.45315	-2.89785	0.0018988	0.02267
g16528	314.599	450.5	178.698	0.396775	1.33361	0.000714922	0.0110796
g16553	244.662	459.285	30.0377	0.0653754	3.93511	0.00130316	0.0171438
g16554	30.977	58.0388	3.91522	0.0675144	3.88866	0.000153525	0.00345336
g16605	207.44	288.651	126.228	0.43704	1.19416	0.00176614	0.0215127
g16606	102.114	176.052	28.1758	0.159846	2.64524	0.000268196	0.00530519
g16696	48.4038	10.0933	86.7143	8.62005	-3.1077	0.00274185	0.0298231
g16704	981.609	561.637	1401.58	2.49512	-1.31911	7.80372e-08	7.55024e-06
g16712	3664.76	5512.83	1816.69	0.329538	1.60148	9.1666e-11	2.46704e-08
g16714	65.6474	95.5595	35.7354	0.373741	1.41989	0.00042325	0.00750944
g16718	462.101	734.163	190.039	0.258788	1.95016	3.70107e-05	0.0011416
g16719	574.725	854.358	295.092	0.34535	1.53387	0.00371308	0.0369919
g16720	772.388	1147.17	397.606	0.346618	1.52858	1.06806e-07	9.95559e-06
g16721	35.3958	52.2024	18.5891	0.356445	1.48825	0.0012562	0.0166927
g16722	1229.25	1707.92	750.576	0.439472	1.18616	0.000517989	0.00873994
g16723	383.217	632.004	134.429	0.212794	2.23247	2.34771e-10	5.60766e-08
g16741	35.0115	68.5819	1.4411	0.0209133	5.57944	1.43923e-07	1.26443e-05
g16746	187.379	57.0646	317.693	5.57231	-2.47828	0.000134471	0.00311649
g16790	252.01	122.97	381.051	3.09997	-1.63225	8.91261e-07	5.81427e-05
g16796	45.3385	10.5476	80.1294	7.60441	-2.92684	0.00443466	0.042044
g16805	1556.45	1006.05	2106.84	2.09439	-1.06653	1.21931e-05	0.000483387
g16822	199.596	102.417	296.775	2.89871	-1.53541	7.88297e-05	0.00207911
g16829	297.459	183.506	411.412	2.24341	-1.1657	0.00316371	0.033003
g16830	275.966	372.964	178.968	0.479898	1.0592	9.67322e-06	0.000400956
g16832	119.735	47.3554	192.114	4.06019	-2.02155	0.000101582	0.00251273
g16837	911.103	1285.39	536.82	0.417654	1.25962	5.85983e-08	5.95599e-06
g16870	15.9071	31.8142	0	0.00621385	7.3303	5.45538e-05	0.00157468
g16874	2471.13	1611.12	3331.13	2.06778	-1.04808	5.97586e-05	0.00168297
g16889	862.302	571.565	1153.04	2.01723	-1.01238	0.00013098	0.00305596
g16903	1642.16	1057.27	2227.06	2.10634	-1.07474	0.000552833	0.00917128
g16907	2592.1	3943.36	1240.83	0.314661	1.66813	7.91238e-09	1.10765e-06
g16930	116.878	13.7957	219.961	15.9441	-3.99495	0.00282365	0.0304405
g16934	194.977	267.796	122.159	0.45576	1.13365	8.84337e-05	0.00225763
g16935	18470.4	35823.4	1117.37	0.0311913	5.00271	0.000117485	0.00281499
g16958	19047.8	12268.7	25826.9	2.10511	-1.0739	0.000546903	0.00911116
g16975	124.794	37.4815	212.106	5.66099	-2.50105	0.00357064	0.035986
g16987	265.402	79.5081	451.296	5.68156	-2.50629	1.21076e-06	7.54836e-05
g16993	16.376	6.47417	26.2778	4.06581	-2.02354	0.00349497	0.035429
g16994	485.922	270.873	700.971	2.58784	-1.37175	0.000652945	0.010404
g170	6.57236	1.2368	11.9079	9.67279	-3.27393	0.00371214	0.0369919
g17016	2322.45	1194.68	3450.21	2.88818	-1.53016	0.000585111	0.00957069
g17042	212.326	305.047	119.605	0.392121	1.35063	0.000492169	0.00842221
g17049	633.707	413.373	854.041	2.06602	-1.04686	0.00114592	0.0156417
g17069	1112.4	663.078	1561.72	2.35529	-1.23591	5.6785e-06	0.00026273
g17078	35.695	53.4663	17.9238	0.335069	1.57747	0.0022811	0.0260073
g17082	488.809	271.801	705.816	2.5975	-1.37713	0.000299301	0.00576649
g17105	56.3773	11.9696	100.785	8.44767	-3.07855	0.00102577	0.0144025
g17106	308.154	173.188	443.119	2.55934	-1.35577	0.00512138	0.0467456
g17111	110.77	179.215	42.326	0.236329	2.08113	2.63734e-05	0.000883357
g17113	132.791	9.70015	255.882	26.2597	-4.71478	2.37884e-24	1.01014e-20
g1712	66.6529	33.3112	99.9946	3.00318	-1.58649	0.00449135	0.0425288
g17135	28.653	49.4904	7.81569	0.158125	2.66086	0.000501097	0.00851129
g17149	251.723	0.6052	502.842	821.351	-9.68185	2.84831e-20	6.40318e-17
g17166	73.9087	38.1979	109.62	2.87589	-1.52401	0.000750317	0.0114471
g17172	63.6975	98.4044	28.9906	0.294476	1.76378	1.63169e-07	1.40447e-05
g17184	752.601	84.3981	1420.8	16.8334	-4.07326	0.00069574	0.0108566
g17187	92.4992	163.06	21.9384	0.13438	2.89561	2.02409e-06	0.000115111
g17192	173.285	65.2625	281.308	4.3097	-2.10759	0.000180814	0.00393742
g17201	6804.92	1757.23	11852.6	6.7453	-2.75388	3.53575e-08	3.87045e-06
g17202	23.7101	10.9137	36.5065	3.33536	-1.73784	0.00302833	0.0320948
g17218	8.29963	1.26634	15.3329	12.3063	-3.62132	0.00476366	0.0443706
g17223	758.331	371.987	1144.68	3.07803	-1.62201	8.7687e-07	5.73824e-05
g17241	183.348	95.1052	271.59	2.85731	-1.51466	1.33709e-07	1.18836e-05
g17242	598.804	309.191	888.417	2.87353	-1.52282	5.43662e-07	3.84051e-05
g17250	58.3037	17.9156	98.6917	5.52846	-2.46688	3.06666e-10	6.93482e-08
g17255	168.479	260.527	76.431	0.293183	1.77012	0.000492522	0.00842221
g17259	77.6098	13.473	141.747	10.5461	-3.39864	8.89843e-05	0.00226568
g17269	30.9323	3.62805	58.2366	15.9489	-3.99539	1.85412e-07	1.54377e-05
g1728	37.8502	6.81401	68.8863	10.138	-3.34171	5.06615e-06	0.000240812
g17280	22.186	3.10992	41.2621	13.3397	-3.73765	0.000141235	0.00323015
g17304	335.773	540.803	130.743	0.241751	2.04841	0.00221181	0.0253763
g17317	81.0308	138.217	23.8442	0.172659	2.534	6.07168e-05	0.00170619
g17335	73.2209	27.1796	119.262	4.39884	-2.13712	1.0429e-07	9.79278e-06
g17339	127.327	70.5621	184.093	2.60927	-1.38364	0.000216275	0.004531
g17344	58.8291	19.5951	98.0631	5.01411	-2.32599	0.000673451	0.0106177
g17348	82.3895	126.422	38.3565	0.30338	1.7208	8.68868e-05	0.00222408
g17360	140.827	69.033	212.621	3.08087	-1.62334	0.000217746	0.00454731
g17365	422.899	184.727	661.07	3.58023	-1.84005	2.13324e-08	2.52403e-06
g17366	26.4754	11.4805	41.4703	3.62469	-1.85786	0.00356431	0.0359602
g17369	26.3106	6.70212	45.9191	6.83632	-2.77322	0.000159587	0.00356038
g17387	779.12	1086.58	471.664	0.434043	1.20409	0.000241414	0.00491458
g17389	13.2116	23.1881	3.23511	0.139176	2.84501	0.00556868	0.049553
g17395	394.327	122.809	665.844	5.4256	-2.43978	6.97079e-07	4.74871e-05
g17396	522.788	161.992	883.584	5.45749	-2.44824	4.87527e-08	5.06299e-06
g17416	223.803	82.439	365.166	4.429	-2.14698	0.000923341	0.013316
g17425	298.388	172.015	424.76	2.47066	-1.3049	8.2482e-07	5.49999e-05
g17438	449.39	276.217	622.563	2.25451	-1.17282	3.58805e-05	0.00112213
g17459	1931.29	1164.67	2697.9	2.3165	-1.21195	8.67667e-06	0.000364792
g17471	967.048	566.705	1367.39	2.41225	-1.27038	3.9917e-10	8.78817e-08
g1748	256.439	429.618	83.2603	0.193906	2.36657	2.39768e-06	0.000130717
g17497	63.9557	3.8359	124.076	32.0569	-5.00256	5.9583e-06	0.000273359
g17502	24.1483	11.6663	36.6304	3.14117	-1.6513	0.00250132	0.0278697
g17506	8.70967	15.6363	1.78307	0.114506	3.12651	0.00502305	0.0462012
g17509	128.371	38.1146	218.627	5.721	-2.51627	4.14912e-11	1.20127e-08
g17532	129.524	76.0139	183.033	2.40623	-1.26677	0.000812186	0.012078
g1758	6.67287	0.315011	13.0307	39.528	-5.3048	0.00165592	0.0205536
g17637	390.404	71.8806	708.928	9.84996	-3.30012	1.63078e-15	1.38497e-12
g17649	292.847	69.9243	515.77	7.36953	-2.88157	1.60111e-16	1.91217e-13
g17652	6.01106	0	12.0221	71.0169	-6.15009	0.000930965	0.0133906
g1767	681.611	314.009	1049.21	3.34043	-1.74003	1.15188e-10	2.97441e-08
g17689	14.3976	2.20823	26.5869	12.1937	-3.60806	0.000435	0.00765423
g17703	934.995	469.573	1400.42	2.98258	-1.57656	2.58534e-10	6.02463e-08
g17710	73.1131	25.243	120.983	4.80065	-2.26323	3.9506e-11	1.16138e-08
g17724	352.339	219.094	485.583	2.21568	-1.14775	0.000352816	0.00653591
g17731	351.061	224.874	477.248	2.12249	-1.08576	0.000623392	0.0100524
g17737	51.3685	12.0514	90.6857	7.54743	-2.91598	3.33884e-07	2.56226e-05
g17749	642.444	359.627	925.26	2.57401	-1.36402	6.9621e-07	4.74871e-05
g178	341.936	158.703	525.169	3.30833	-1.7261	0.00256518	0.0283826
g17832	387.979	143.089	632.869	4.42276	-2.14495	0.000137736	0.00317481
g17882	14.2207	0	28.4413	168.271	-7.39464	2.6466e-07	2.07406e-05
g17905	6145.36	3765.09	8525.64	2.26451	-1.1792	1.46614e-08	1.84314e-06
g17910	32.6513	8.03803	57.2645	7.09008	-2.8258	0.00395505	0.038687
g17970	28.7103	47.4159	10.0048	0.210935	2.24513	0.000435015	0.00765423
g1798	24.1945	3.07879	45.3103	14.7311	-3.88079	0.00040624	0.00727179
g17983	191.053	115.983	266.122	2.29653	-1.19946	0.000271858	0.00535822
g17993	98.9246	142.053	55.7959	0.392498	1.34924	0.00463717	0.0434999
g18031	312.342	468.7	155.983	0.332771	1.5874	0.000103265	0.0025412
g18043	313.431	459.846	167.016	0.363043	1.46179	0.000186488	0.00403796
g18080	259.715	86.0674	433.363	5.0346	-2.33188	7.38202e-10	1.50866e-07
g18081	257.863	107.158	408.568	3.81291	-1.93089	4.32562e-07	3.1488e-05
g18083	1866.28	1107.97	2624.6	2.36908	-1.24432	5.48739e-11	1.542e-08
g18089	857.467	342.027	1372.91	4.01368	-2.00493	2.08969e-07	1.69919e-05
g18092	774.623	508.323	1040.92	2.04777	-1.03406	3.78113e-05	0.0011616
g18097	282.953	163.823	402.083	2.45518	-1.29583	0.00022698	0.00469146
g1813	12.8323	4.36838	21.2962	4.90403	-2.29397	0.00519525	0.0472169
g1818	72.4597	21.5516	123.368	5.72489	-2.51725	0.0030735	0.0323923
g18266	263.568	143.501	383.636	2.67256	-1.41822	3.32098e-05	0.00105677
g18320	35.819	11.3037	60.3344	5.35646	-2.42128	0.00420974	0.0404943
g18322	39.5276	6.53484	72.5203	11.1387	-3.47751	3.13275e-05	0.00100742
g18435	10.7169	0.631597	20.8022	33.7749	-5.07788	3.45271e-05	0.00108871
g18448	266.234	153.248	379.221	2.47338	-1.30648	3.4313e-05	0.00108286
g18539	224.692	145.55	303.833	2.08894	-1.06277	0.000695053	0.0108539
g18548	136.097	225.774	46.4205	0.205557	2.28239	0.000353082	0.00653728
g18585	807.229	493.711	1120.75	2.27047	-1.18299	0.00015597	0.00349602
g1863	1142.1	537.698	1746.51	3.24907	-1.70003	7.3687e-11	2.04923e-08
g18675	99.782	169.965	29.5995	0.17442	2.51936	1.05271e-10	2.75558e-08
g18817	14.4437	2.13219	26.7552	12.5174	-3.64587	3.61541e-05	0.0011268
g18879	551.08	321.245	780.914	2.43118	-1.28166	6.70813e-08	6.67616e-06
g18954	13425.1	8644.4	18205.8	2.1061	-1.07458	0.000705937	0.010967
g1899	119.144	164.999	73.2897	0.444071	1.17114	0.000425203	0.007537
g1901	25.3943	40.382	10.4065	0.257209	1.95899	0.000308357	0.00588342
g19138	55.6174	78.9906	32.2443	0.408367	1.29206	0.000280269	0.00548159
g19167	501.85	768.736	234.964	0.305579	1.71038	4.16711e-05	0.00125397
g19170	57.7111	93.2072	22.215	0.238068	2.07055	0.000798639	0.0119411
g19184	61.6022	13.3952	109.809	8.18733	-3.03339	1.7634e-06	0.000102419
g19191	225.653	140.424	310.881	2.21412	-1.14673	0.000909	0.0131638
g19213	534.177	298.498	769.855	2.57962	-1.36716	1.683e-06	9.86493e-05
g19218	304.231	527.783	80.6786	0.152853	2.70979	2.29878e-07	1.85734e-05
g19281	369.32	107.733	630.907	5.8598	-2.55085	9.85315e-06	0.000407972
g19328	830.239	470.993	1189.49	2.5261	-1.33691	2.68758e-16	2.89235e-13
g19339	586.267	132.261	1040.27	7.86753	-2.97591	2.57406e-07	2.03671e-05
g19379	121.856	43.207	200.505	4.64003	-2.21413	1.29066e-05	0.00050332
g19380	120.148	46.1628	194.133	4.20363	-2.07164	7.11607e-05	0.00193287
g19416	875.001	475.084	1274.92	2.68355	-1.42414	3.59935e-05	0.00112437
g19417	285.014	127.221	442.808	3.48238	-1.80007	0.00442411	0.041968
g19479	3384.53	2200.63	4568.43	2.07605	-1.05384	9.49184e-09	1.2818e-06
g19484	27.3033	8.88238	45.7241	5.14377	-2.36283	0.00178778	0.0217038
g19485	80.6244	13.8205	147.428	10.6713	-3.41566	1.81256e-07	1.52243e-05
g19493	18.2912	31.602	4.98028	0.157969	2.66228	0.000181695	0.00395209
g19500	52.8591	79.2114	26.5068	0.334226	1.5811	0.0012924	0.01706
g19542	261.784	161.795	361.774	2.23665	-1.16134	0.00365395	0.0365749
g19559	3052.01	1227.36	4876.66	3.97351	-1.99042	3.87766e-08	4.16271e-06
g19567	87.6833	39.4761	135.891	3.44244	-1.78343	2.71358e-08	3.05914e-06
g19578	316.044	35.5472	596.541	16.7814	-4.06879	0.000379481	0.00688377
g19589	53.4515	17.7484	89.1546	5.03182	-2.33108	0.00141265	0.0182081
g19590	330.262	108.696	551.828	5.07907	-2.34456	0.000210483	0.00445159
g19622	32.5319	53.5395	11.5243	0.21469	2.21968	0.00268985	0.0293457
g1964	174.137	232.648	115.626	0.496634	1.00974	0.00316773	0.0330226
g19642	766.184	1238.34	294.03	0.237481	2.07412	3.58765e-07	2.71503e-05
g19653	11.8945	1.20883	22.5801	18.4972	-4.20924	1.09048e-05	0.000440608
g19658	5762.12	3637.5	7886.74	2.16823	-1.11652	0.000646188	0.0103247
g19685	172.835	240.185	105.484	0.438933	1.18793	6.92425e-05	0.00189152
g19692	90.9392	125.411	56.4675	0.449671	1.15306	0.00504089	0.0462767
g1970	76.2163	152.079	0.354172	0.00253131	8.6259	0.00093571	0.0134382
g19700	88.6691	19.9814	157.357	7.88685	-2.97945	0.000268095	0.00530519
g1971	2151.99	4252.23	51.7421	0.0121664	6.36095	0.000212968	0.00449011
g19714	43.1796	11.5612	74.798	6.48508	-2.69713	0.00175601	0.0214201
g19796	32.5392	3.39695	61.6814	18.1936	-4.18536	7.36026e-05	0.00197811
g19826	84.8576	113.708	56.0075	0.492462	1.02191	0.00110093	0.0151948
g19842	123.076	36.6431	209.508	5.71809	-2.51553	0.0019604	0.0232468
g19847	317.048	136.999	497.096	3.63002	-1.85998	0.000332349	0.00623533
g19858	14.273	1.26634	27.2796	21.8529	-4.44975	0.00129893	0.0171139
g19859	56.6201	25.5866	87.6536	3.43471	-1.78019	0.00350865	0.0355372
g1989	714.798	1381.29	48.3049	0.0349668	4.83787	0.000475726	0.00820065
g19902	197.515	80.8298	314.2	3.88797	-1.95902	1.56869e-08	1.94644e-06
g19905	126.961	39.9	214.023	5.37119	-2.42524	4.28914e-08	4.52812e-06
g19920	244.152	102.469	385.836	3.76944	-1.91435	4.78622e-11	1.3753e-08
g19934	59.5442	37.2832	81.8052	2.19274	-1.13274	0.00346906	0.0352599
g1994	68.0495	132.481	3.61751	0.027271	5.19649	0.00263369	0.028898
g19965	172.973	61.0747	284.871	4.66688	-2.22246	1.1437e-06	7.18893e-05
g19966	98.3084	39.5684	157.048	3.9715	-1.98968	0.000658897	0.0104572
g19971	257.009	113.148	400.871	3.54364	-1.82523	2.30351e-08	2.7004e-06
g19986	52.2679	87.0058	17.5299	0.201525	2.31097	0.000216452	0.004531
g20005	156.034	54.7545	257.314	4.70369	-2.23379	2.38476e-06	0.000130198
g20022	18975	11190.3	26759.6	2.39136	-1.25783	1.23951e-11	4.19207e-09
g20025	313.59	157.27	469.909	2.98839	-1.57937	0.000148447	0.00336887
g20026	384.872	210.088	559.656	2.66354	-1.41334	2.40145e-05	0.000817241
g20035	17.9036	28.3028	7.5045	0.265168	1.91502	0.00275673	0.0299386
g20036	57.6605	28.7208	86.6003	3.02361	-1.59627	7.67883e-06	0.000332805
g20038	303.827	50.1218	557.533	11.1259	-3.47584	1.26226e-09	2.44871e-07
g20052	338.352	207.805	468.898	2.25637	-1.174	0.00301863	0.0320186
g20067	6.26315	0.288614	12.2377	37.1318	-5.21458	0.000820689	0.0121708
g20075	189.839	75.9334	303.745	4.00089	-2.00032	7.51873e-05	0.00200484
g2008	19.996	39.2566	0.735303	0.0184564	5.75973	0.000645546	0.0103225
g20085	12.0249	2.81973	21.2301	7.59545	-2.92514	0.00229646	0.0261357
g20087	18.8547	2.16016	35.5492	16.497	-4.04413	0.000323372	0.00611495
g20204	40.6352	56.2245	25.0459	0.44546	1.16663	0.00433373	0.0413317
g2021	9.85226	2.15858	17.5459	8.16132	-3.0288	0.000637919	0.0102219
g20238	453.95	643.562	264.338	0.410658	1.28399	0.00046731	0.0080994
g20250	159.934	294.92	24.9484	0.0846004	3.56319	0.00413504	0.039987
g20271	156.849	73.0534	240.645	3.29793	-1.72156	6.81686e-06	0.000304346
g20274	213.357	102.236	324.478	3.17436	-1.66646	0.00512607	0.0467772
g20281	364.705	512.312	217.099	0.423618	1.23916	5.82351e-05	0.00164735
g20297	2034.77	2722.95	1346.6	0.494514	1.01592	0.00186755	0.0224413
g20330	305.325	168.762	441.889	2.61802	-1.38847	2.18581e-06	0.000122128
g20335	591.244	357.337	825.151	2.30938	-1.20751	0.000946065	0.0135364
g20357	1418.41	891.345	1945.48	2.18304	-1.12634	0.000242012	0.00491458
g20366	28.0011	43.0774	12.9249	0.299602	1.73888	0.000230506	0.00474893
g20387	57.0096	84.5455	29.4737	0.348015	1.52278	0.000603825	0.00980721
g20403	312.281	181.247	443.314	2.44611	-1.29049	6.18342e-05	0.00172996
g20434	232.222	312.914	151.531	0.484278	1.04609	0.000577057	0.00947076
g20439	172.625	71.9879	273.262	3.79791	-1.9252	0.0011465	0.0156417
g20452	127.631	177.361	77.9017	0.439216	1.187	0.00166559	0.0206467
g20476	3669.38	5530.19	1808.57	0.327045	1.61244	3.86785e-06	0.000191226
g20482	147.506	77.6511	217.36	2.80088	-1.48588	0.000577066	0.00947076
g20500	119.074	211.071	27.0772	0.12818	2.96376	1.62936e-05	0.00060716
g20504	648.384	1146.09	150.677	0.131501	2.92686	4.37552e-08	4.59394e-06
g20509	701.802	433.234	970.37	2.2399	-1.16344	1.14822e-05	0.000458053
g20528	841.93	429.397	1254.46	2.92156	-1.54674	0.00297474	0.031685
g20539	60.6494	1.52699	119.772	78.3351	-6.29159	4.62204e-09	7.29919e-07
g20549	49.453	19.2411	79.665	4.1546	-2.05471	3.65277e-05	0.00113402
g20583	1577.5	705.171	2449.82	3.47416	-1.79666	3.26458e-06	0.000167917
g20584	2201.84	3116.31	1287.37	0.413105	1.27542	1.74343e-06	0.000101568
g20609	1092.29	1608.31	576.264	0.358329	1.48065	1.23777e-07	1.11042e-05
g2061	5.6017	0	11.2034	66.1944	-6.04864	0.000341402	0.00636147
g20613	338.897	85.6999	592.094	6.90982	-2.78865	2.03093e-05	0.000715357
g20658	35.7184	1.89951	69.5373	37.2495	-5.21915	7.75596e-08	7.52308e-06
g20710	237.814	363.316	112.312	0.309042	1.69412	5.20546e-06	0.000245691
g20738	2280.42	1497.98	3062.85	2.04476	-1.03193	0.000160832	0.00358398
g20790	71.786	41.1662	102.406	2.48823	-1.31512	0.00263335	0.028898
g20810	20097.5	10219	29976	2.9334	-1.55257	4.90274e-10	1.04675e-07
g20879	157.668	213.381	101.956	0.477469	1.06652	0.00228733	0.0260706
g20949	699.31	1044.57	354.05	0.338963	1.5608	0.00166923	0.0206715
g20966	62.1369	96.1416	28.1322	0.292924	1.7714	0.000141218	0.00323015
g20974	15.5362	30.7195	0.3529	0.0125131	6.32041	3.73613e-05	0.00114963
g21023	658.081	74.5899	1241.57	16.662	-4.05849	9.35984e-107	3.57705e-102
g21040	56.2934	106.582	6.00439	0.0566451	4.14191	5.41174e-09	8.23986e-07
g21053	22.6699	44.9856	0.354172	0.00854915	6.87	2.80041e-05	0.000923411
g21064	49.2521	91.7016	6.80252	0.0741319	3.75376	6.44715e-05	0.00178599
g21136	1044.34	1854.17	234.506	0.126471	2.98312	6.72357e-07	4.62149e-05
g21145	65.6048	125.841	5.36853	0.0426455	4.55146	3.4684e-06	0.000176084
g21146	96.4536	175.895	17.0121	0.0965542	3.37252	5.63689e-05	0.00161246
g21148	657.272	423.287	891.256	2.10628	-1.07469	0.00102146	0.0143571
g21175	107.75	192.073	23.4271	0.121854	3.03677	0.000337019	0.00629865
g21176	73.6778	135.056	12.3	0.0908801	3.45989	3.94293e-05	0.00119974
g21180	921.37	582.927	1259.81	2.16175	-1.1122	9.48927e-05	0.00237804
g21182	240.477	75.4569	405.498	5.37368	-2.42591	0.000495271	0.00844
g21199	69.4485	24.5253	114.372	4.66942	-2.22324	0.00467432	0.0437625
g21273	6.52022	0.893815	12.1466	13.3491	-3.73867	0.00188326	0.0225336
g21291	157.284	91.7725	222.796	2.42661	-1.27894	0.000387242	0.00699727
g21294	354.004	205.076	502.933	2.45314	-1.29463	0.00311619	0.0326099
g21304	48.222	5.05592	91.3882	18.3261	-4.19582	4.13477e-10	9.02964e-08
g21336	15.1037	5.54766	24.6596	4.46046	-2.15719	0.000654671	0.0104205
g2136	30.5989	1.44307	59.7548	39.7479	-5.31281	3.74601e-09	6.14426e-07
g21409	152.547	227.648	77.4467	0.340431	1.55457	8.74563e-07	5.73296e-05
g21430	770.33	1103.94	436.716	0.395586	1.33794	0.000601433	0.00978499
g21444	1216.7	751.871	1681.53	2.23689	-1.16149	6.03378e-06	0.000275829
g21446	168.773	249.022	88.5232	0.355162	1.49345	0.0018596	0.0223614
g21463	9133.84	12313.1	5954.56	0.483595	1.04813	0.000205001	0.00436221
g21474	1476.94	907.575	2046.31	2.25473	-1.17295	0.00123368	0.0164564
g21475	26069.4	37421.6	14717.2	0.393278	1.34638	4.0111e-05	0.00121267
g21500	340.824	207.208	474.439	2.29009	-1.1954	0.00065338	0.0104043
g21506	456.624	284.144	629.104	2.21466	-1.14709	0.000769273	0.0116571
g21510	1033.57	505.654	1561.48	3.08856	-1.62693	0.000305346	0.00584933
g21515	920.706	312.593	1528.82	4.89218	-2.29048	1.48186e-06	8.86262e-05
g21557	2861.91	1898.63	3825.19	2.01493	-1.01073	8.01098e-07	5.38059e-05
g21571	92.6434	38.1061	147.181	3.86499	-1.95046	0.00113256	0.0155247
g21576	754.739	423.254	1086.22	2.56688	-1.36001	1.11425e-07	1.01987e-05
g21618	652.829	301.316	1004.34	3.33386	-1.73719	7.33221e-05	0.00197335
g21638	1784.2	1114.79	2453.61	2.20108	-1.13821	0.000393209	0.00707498
g21640	65.446	19.3485	111.543	5.74812	-2.52309	0.0020877	0.0244102
g21698	23.4094	11.4878	35.3311	3.06548	-1.61611	0.00508526	0.0465382
g21729	9.41788	2.04827	16.7875	8.04069	-3.00732	0.00528132	0.0477267
g21767	61.504	82.5265	40.4815	0.490073	1.02893	0.00200947	0.0236951
g21771	38.4514	58.9989	17.9039	0.303397	1.72072	1.54652e-05	0.00058345
g21774	33.021	58.483	7.55893	0.129054	2.95396	0.000306703	0.00586356
g21777	20.3965	31.8532	8.93976	0.280453	1.83417	0.00144051	0.0184676
g21785	213.69	125.608	301.771	2.40509	-1.26609	0.000389254	0.00702198
g21796	161.463	94.469	228.457	2.42122	-1.27573	9.06164e-05	0.00229938
g21821	44.8601	74.2596	15.4606	0.207707	2.26738	9.59304e-06	0.000398064
g2195	2770.18	4123.81	1416.56	0.343525	1.54152	2.34885e-08	2.73677e-06
g21965	15.1814	2.46887	27.894	11.3511	-3.50476	1.64655e-05	0.000610934
g22032	9.62384	18.5271	0.720551	0.0387437	4.68989	0.00030716	0.00586377
g22089	92.9361	124.859	61.0134	0.488384	1.03391	0.000962966	0.0137422
g22117	7.62518	0.6052	14.6452	23.9907	-4.5844	0.000471376	0.00815291
g22123	14.0391	27.7105	0.367652	0.0138826	6.17058	0.00132847	0.0174109
g22249	3312.85	2188.43	4437.27	2.02769	-1.01984	5.68925e-06	0.000262909
g22345	24.4482	46.0425	2.85398	0.062066	4.01005	0.00244376	0.0273961
g22405	604.399	384.039	824.759	2.14782	-1.10287	0.000162008	0.00360179
g22410	32.8628	10.7898	54.9358	5.10012	-2.35053	0.000109628	0.00266518
g22428	4.04865	8.0973	0	0.0244435	5.35441	0.00268085	0.029268
g22503	31.7016	4.2364	59.1668	13.9179	-3.79887	0.000132355	0.0030824
g2256	34.0563	7.2346	60.878	8.47358	-3.08297	3.97092e-05	0.00120442
g2263	51.4814	92.1899	10.7729	0.116718	3.0989	9.01601e-05	0.00229099
g22836	380.091	233.809	526.373	2.25186	-1.17112	8.19834e-05	0.00212851
g22991	26.4367	44.6753	8.19809	0.183766	2.44406	0.000615536	0.00995933
g23030	91.3164	134.922	47.7108	0.353694	1.49942	0.00437319	0.0416369
g2316	375.26	129.174	621.346	4.80935	-2.26584	3.71921e-05	0.00114534
g23226	43.9861	67.9311	20.0412	0.29467	1.76283	0.000828535	0.0122539
g2326	699.738	430.393	969.082	2.25194	-1.17117	0.000437062	0.00768387
g23265	88.5354	49.0556	128.015	2.61377	-1.38613	1.58846e-05	0.000595159
g23360	1591.1	897.929	2284.28	2.54364	-1.34689	0.000391862	0.0070574
g23362	2255.31	1296.65	3213.97	2.47848	-1.30946	7.90072e-07	5.33466e-05
g23370	654.432	358.284	950.581	2.6535	-1.4079	0.000102218	0.00252356
g23411	248.403	104.272	392.535	3.76541	-1.91281	7.0148e-06	0.000308498
g23443	24.3222	9.6881	38.9563	4.03774	-2.01355	0.00475017	0.0442956
g23446	499.059	688.085	310.033	0.450494	1.15042	0.000872545	0.0127635
g23555	58.2294	80.9415	35.5173	0.438636	1.1889	0.000573747	0.00943091
g23571	31.7478	55.3675	8.12815	0.147282	2.76335	0.00109322	0.0151046
g23621	33.8796	50.9979	16.7613	0.329181	1.60305	0.00215811	0.0249778
g23682	166.918	103.72	230.117	2.22076	-1.15106	0.000657669	0.0104421
g23701	55.3021	29.076	81.5282	2.81143	-1.4913	0.000225122	0.00466313
g23723	116.485	175.007	57.962	0.331375	1.59346	0.000336788	0.00629865
g2374	62.7461	20.9	104.592	5.02444	-2.32896	3.74131e-06	0.000186417
g2378	720.961	337.275	1104.65	3.27553	-1.71173	2.84771e-09	4.94388e-07
g23785	371.472	498.914	244.031	0.489083	1.03185	7.65349e-05	0.00203261
g23786	96.9892	145.078	48.9003	0.336967	1.56932	0.000598019	0.0097419
g23787	55.6377	97.164	14.1113	0.14482	2.78766	6.708e-05	0.00184403
g23817	31.6302	46.1398	17.1206	0.371739	1.42764	0.00431301	0.0412178
g23833	102.291	146.123	58.4591	0.400497	1.32014	0.00192445	0.022926
g23859	75.1348	114.43	35.8399	0.313099	1.67531	6.74581e-07	4.62845e-05
g23865	848.381	1193.11	503.654	0.422167	1.24411	5.54556e-09	8.37687e-07
g23866	102.797	139.803	65.7904	0.470152	1.0888	0.00401022	0.0390667
g23867	799.176	1137.55	460.806	0.405112	1.30361	1.50768e-15	1.30952e-12
g23869	639.421	963.189	315.652	0.32773	1.60942	1.17371e-21	3.20397e-18
g23893	106.44	163.895	48.985	0.299189	1.74087	1.21728e-07	1.09719e-05
g23908	153.936	102.038	205.834	2.01539	-1.01106	0.00097112	0.0138173
g23918	170.814	72.8277	268.8	3.69245	-1.88458	0.00378075	0.0374712
g23928	406.468	199.575	613.36	3.07424	-1.62023	0.00244128	0.0273762
g23938	224.857	120.555	329.158	2.73163	-1.44976	0.000175162	0.00382907
g23949	1374.35	1904.54	844.169	0.443197	1.17398	1.26827e-05	0.000498658
g23974	221.593	118.097	325.09	2.75318	-1.4611	0.000283717	0.00552922
g24004	99.8103	172.987	26.6332	0.153729	2.70154	3.79679e-07	2.8285e-05
g24015	20.1832	32.8421	7.52434	0.22914	2.1257	0.000128074	0.00299731
g2402	483.582	279.565	687.6	2.45935	-1.29828	6.89157e-06	0.000305833
g24023	77.2508	131.103	23.3981	0.17821	2.48835	8.93437e-05	0.00227327
g24037	82.702	47.5795	117.824	2.4743	-1.30702	0.00463643	0.0434999
g24041	72.7824	126.172	19.3931	0.153516	2.70354	2.88255e-05	0.000944972
g24045	29.3576	4.63533	54.0799	11.6886	-3.54703	0.000306181	0.00585652
g24051	454.226	671.123	237.328	0.353666	1.49954	0.00108516	0.015015
g24059	517.253	302.094	732.412	2.42483	-1.27788	1.235e-06	7.6372e-05
g24062	191.683	104.37	278.995	2.67366	-1.41882	0.00116258	0.0158059
g24066	4807.44	6591.07	3023.82	0.458786	1.12411	0.00556306	0.0495349
g24072	783.293	152.097	1414.49	9.30148	-3.21746	0.00323216	0.0334933
g24084	1018.53	291.023	1746.04	6.00074	-2.58514	1.03915e-05	0.000425553
g24085	539.589	177.947	901.231	5.06532	-2.34065	2.49853e-07	1.99762e-05
g24112	345.946	135.478	556.414	4.10782	-2.03837	1.11993e-05	0.000449583
g24209	6.91049	0.89224	12.9287	14.2075	-3.82859	0.001535	0.0194011
g24210	50.4773	11.4631	89.4914	7.85009	-2.97271	7.91541e-12	2.80096e-09
g24246	194.226	80.1441	308.308	3.84613	-1.94341	0.00303403	0.0321285
g24290	87.8561	17.5515	158.161	9.02537	-3.17399	0.000851858	0.0125021
g24298	4415.55	2895.67	5935.43	2.04982	-1.0355	0.000122261	0.00289315
g24326	9.72102	0.6052	18.8368	30.8275	-4.94615	0.00028322	0.00552799
g24327	7.55512	0	15.1102	89.3124	-6.48079	3.47761e-05	0.00109566
g24334	23.8209	11.4895	36.1524	3.1603	-1.66006	0.00341887	0.0348796
g24337	365.65	72.0153	659.284	9.16371	-3.19593	9.54155e-16	9.34999e-13
g24342	1344.08	533.108	2155.06	4.04283	-2.01537	5.31236e-06	0.00024972
g24348	423.934	574.243	273.625	0.476536	1.06934	0.000311486	0.00592832
g24359	41.5177	21.1928	61.8426	2.91904	-1.54549	0.000343782	0.00639956
g24386	19.4976	35.8018	3.1934	0.0894164	3.48332	0.00298751	0.0317803
g24388	489.489	310.761	668.216	2.15031	-1.10454	0.00421976	0.0405702
g24398	20.822	4.89754	36.7464	7.50074	-2.90703	0.0041968	0.0404105
g24399	241.625	117.959	365.291	3.09742	-1.63107	1.64143e-05	0.000610219
g24401	852.201	489.81	1214.59	2.47999	-1.31033	3.9009e-07	2.88357e-05
g24427	546.354	833.795	258.912	0.31048	1.68743	0.000607877	0.00986464
g24434	199.686	127.223	272.149	2.14119	-1.09842	0.000309952	0.00590205
g24435	69.1459	102	36.2916	0.356219	1.48916	0.000511971	0.00865751
g24467	1638.73	2790.49	486.968	0.174503	2.51867	4.91731e-07	3.52579e-05
g24481	81.4348	29.6546	133.215	4.4896	-2.16659	1.38533e-12	5.69282e-10
g24488	540.585	1031.91	49.2589	0.0477314	4.38892	0.00110987	0.015285
g24498	54.9574	77.7561	32.1588	0.413505	1.27402	0.005216	0.0473041
g24506	341.33	491.482	191.178	0.388864	1.36266	0.000410298	0.00732727
g24524	6.94876	0.633172	13.2643	21.4562	-4.42332	0.00117622	0.0159417
g2456	1996.61	1265.18	2728.03	2.15633	-1.10857	1.6632e-05	0.000615319
g24567	47.216	21.8033	72.6288	3.33865	-1.73926	0.00436011	0.0415537
g24583	984.95	118.408	1851.49	15.6282	-3.96608	4.03298e-11	1.17655e-08
g24592	1028.46	563.309	1493.61	2.65158	-1.40685	0.000157113	0.0035134
g24593	61.4315	27.0234	95.8396	3.5578	-1.83099	4.52034e-05	0.00134439
g24600	34.1408	7.02816	61.2534	8.7079	-3.12232	0.000273161	0.00537559
g24605	664.92	287.608	1042.23	3.62405	-1.8576	7.22606e-05	0.00195303
g24631	3887.74	2308.47	5467.01	2.36826	-1.24383	0.000617369	0.00997632
g24657	84.1338	25.9968	142.271	5.46361	-2.44985	0.000247006	0.0049867
g24664	143.832	63.2853	224.378	3.54405	-1.8254	8.54432e-07	5.6397e-05
g24711	82.5059	157.582	7.42999	0.0472543	4.40341	2.42295e-06	0.000131718
g24727	5.86508	0	11.7302	69.4055	-6.11698	0.000300912	0.00578878
g24747	27.598	48.0959	7.10023	0.148215	2.75424	7.30689e-06	0.000318049
g24751	268.327	177.668	358.986	2.0204	-1.01464	0.00267758	0.0292536
g24752	266.051	173.259	358.843	2.07283	-1.0516	5.57487e-06	0.000259178
g24757	173.1	110.432	235.768	2.13557	-1.09462	6.98332e-06	0.000307822
g24761	5.7229	11.4458	0	0.0172762	5.85507	0.00279668	0.0302265
g24775	868.202	1234.68	501.725	0.406332	1.29927	0.00329806	0.0339553
g24777	43.6192	74.8493	12.3892	0.165967	2.59103	0.000216233	0.004531
g24778	289.112	520.616	57.6088	0.110577	3.17687	2.82774e-13	1.3392e-10
g248	578.966	273.031	884.901	3.2412	-1.69653	0.00305062	0.0322327
g24814	281.421	126.59	436.251	3.44752	-1.78556	0.000363196	0.00668531
g24816	134.273	75.6175	192.929	2.55078	-1.35094	7.41733e-05	0.00198925
g24839	522.128	777.596	266.66	0.342871	1.54426	0.00125126	0.0166387
g24840	73.572	7.56481	139.579	18.4084	-4.20229	7.22675e-06	0.000315734
g24842	70.3718	46.0648	94.6789	2.05442	-1.03873	0.00284207	0.0305583
g24845	309.929	420.841	199.017	0.472667	1.0811	0.00440503	0.0418669
g24846	61.384	18.2759	104.492	5.72671	-2.51771	7.14259e-05	0.00193732
g24847	200.5	69.2119	331.789	4.7971	-2.26216	6.86612e-05	0.00187967
g24861	120.365	64.9423	175.787	2.70855	-1.43752	0.00342024	0.0348843
g24863	911.979	353.23	1470.73	4.16427	-2.05806	1.91939e-07	1.59118e-05
g24882	97.5917	162.51	32.6735	0.200792	2.31623	2.43182e-10	5.77247e-08
g24897	91.417	29.1343	153.7	5.26961	-2.3977	0.000388057	0.00700537
g24909	130.166	219.396	40.9369	0.186464	2.42303	6.23129e-12	2.24662e-09
g24953	150.148	44.2782	256.017	5.78445	-2.53218	0.000403364	0.00723725
g24954	59.5859	25.9865	93.1852	3.5901	-1.84402	0.000421252	0.0074879
g24955	336.812	451.592	222.032	0.491828	1.02378	0.00110303	0.0152127
g24975	1781.02	936.068	2625.96	2.80519	-1.4881	2.24717e-05	0.000778606
g24984	39.5628	21.6987	57.4269	2.64457	-1.40303	0.002421	0.0272288
g24985	32.4806	4.42905	60.5322	13.7403	-3.78034	0.00190083	0.022687
g25025	5383.32	2935.61	7831.03	2.66772	-1.41561	1.73112e-05	0.000634308
g25035	4.07746	0.288614	7.86631	23.8866	-4.57813	0.00538498	0.0483775
g25054	111.609	50.222	172.996	3.44213	-1.7833	1.32772e-05	0.000512541
g25065	26.0703	5.698	46.4427	8.0845	-3.01516	6.915e-06	0.000306223
g25068	393.474	549.329	237.619	0.432695	1.20858	0.000457186	0.00796367
g25082	104.518	59.0826	149.954	2.54043	-1.34507	0.000332553	0.0062361
g25102	483.246	908.971	57.5199	0.0632839	3.98202	0.000154635	0.00347424
g25108	52.8318	3.65917	102.004	27.8435	-4.79927	3.039e-05	0.000981754
g25110	335.496	117.352	553.641	4.71446	-2.23709	2.68503e-15	2.09416e-12
g25111	790.144	1076.37	503.915	0.468146	1.09497	8.17272e-06	0.00035094
g25118	14.558	28.0266	1.08948	0.0385184	4.69831	5.57401e-05	0.00160046
g25119	78.8584	29.7862	127.931	4.29613	-2.10304	2.50573e-05	0.000847446
g25121	47.6695	21.8339	73.5052	3.3679	-1.75185	0.000381669	0.00691291
g25142	1890.66	2679.38	1101.95	0.411262	1.28187	2.57888e-05	0.000869635
g25157	3305.05	1613.55	4996.55	3.09663	-1.6307	1.15303e-07	1.04668e-05
g25159	63.1594	114.938	11.3806	0.0991117	3.3348	0.00144545	0.0185247
g25168	133.792	43.7386	223.845	5.12295	-2.35697	0.000630912	0.0101394
g25173	814.093	535.279	1092.91	2.04199	-1.02997	2.71825e-06	0.000144483
g25174	224.736	18.6638	430.809	23.1642	-4.53382	5.62893e-18	8.96336e-15
g25186	152.918	80.6036	225.233	2.78957	-1.48004	3.94428e-06	0.000194501
g25188	203.431	13.4639	393.399	29.3546	-4.87551	2.11505e-14	1.30372e-11
g25189	50.4553	9.11874	91.7918	10.124	-3.3397	1.23039e-05	0.000486768
g25197	700.979	381.7	1020.26	2.67344	-1.4187	1.69901e-07	1.43653e-05
g25206	22.7983	4.09497	41.5017	9.99073	-3.32059	0.000366	0.00672148
g25208	676.702	1111.46	241.945	0.217665	2.19982	2.49409e-10	5.88373e-08
g25209	483.353	682.689	284.017	0.416049	1.26518	5.99079e-06	0.000274249
g25216	32.0715	57.2314	6.91162	0.120351	3.05468	0.00198953	0.023489
g25223	1248.57	628.784	1868.36	2.97159	-1.57123	0.00235221	0.0266275
g25224	516.924	289.532	744.316	2.57102	-1.36234	0.00187076	0.0224454
g25296	33.9431	9.64161	58.2447	6.05868	-2.599	0.000789395	0.0118494
g25306	1025.1	554.576	1495.62	2.69763	-1.43169	6.59148e-06	0.000296012
g25316	84.1104	7.47515	160.746	21.6498	-4.43628	1.40092e-13	7.13851e-11
g25321	12.9329	25.5117	0.354172	0.0150676	6.05241	0.000293894	0.00568048
g25343	338.801	169.705	507.898	2.99426	-1.5822	0.00135426	0.017652
g25346	61.563	99.9658	23.1602	0.231139	2.11317	0.000153201	0.0034481
g25357	294.038	103.612	484.463	4.67691	-2.22556	1.421e-06	8.57922e-05
g25368	181.85	99.2642	264.437	2.66362	-1.41339	0.00163344	0.0203605
g25419	2381.03	1315.52	3446.54	2.61992	-1.38952	9.2095e-07	5.97554e-05
g25433	678.497	1011.05	345.947	0.342098	1.54752	0.00391439	0.0383875
g25434	197.599	59.7711	335.427	5.61158	-2.48841	0.000248924	0.00501482
g25437	61.501	118.355	4.64671	0.0392606	4.67077	1.99183e-05	0.000704813
g25441	1639.09	935.5	2342.68	2.50428	-1.32439	7.20033e-05	0.00195021
g25443	9.49605	1.23837	17.7537	14.4015	-3.84815	0.0025665	0.028389
g25460	44.8866	25.9913	63.782	2.45955	-1.2984	0.0039348	0.0385481
g25463	53.3203	33.7698	72.8708	2.15843	-1.10998	0.00415115	0.0400487
g25475	59.0539	13.2433	104.865	7.92102	-2.98569	0.00107678	0.0149261
g25480	430.065	626.272	233.857	0.373312	1.42155	0.000629542	0.0101217
g25487	601.322	369.813	832.832	2.25249	-1.17152	0.00011701	0.00280713
g25506	11610.5	6685.61	16535.5	2.47331	-1.30644	2.14901e-06	0.000120247
g25514	105.82	154.028	57.6123	0.373865	1.41941	1.72593e-05	0.00063301
g25518	396.855	546.203	247.508	0.453135	1.14199	1.01792e-05	0.000418751
g25533	720.266	1242.7	197.829	0.159159	2.65146	8.98595e-11	2.43557e-08
g25566	728.814	458.407	999.221	2.17977	-1.12417	0.0012016	0.0161866
g25567	56.8179	31.4702	82.1655	2.60855	-1.38325	0.00340204	0.0348288
g25584	122.232	179.969	64.4949	0.358402	1.48035	9.04367e-06	0.000378971
g25593	843.353	536.516	1150.19	2.1445	-1.10064	1.53652e-08	1.91274e-06
g25606	204.862	78.0919	331.631	4.24275	-2.085	3.26422e-08	3.60545e-06
g25610	547.335	808.523	286.147	0.353926	1.49848	7.68073e-06	0.000332805
g25642	34.5853	58.7063	10.4643	0.177593	2.49335	4.17213e-05	0.0012545
g25664	112.572	32.928	192.216	5.84198	-2.54646	5.39259e-08	5.51039e-06
g25666	2251.59	3157.37	1345.82	0.426227	1.23031	7.76079e-06	0.000335135
g25671	667.793	231.176	1104.41	4.77529	-2.25559	0.000495467	0.00844
g25680	15.6542	0.946607	30.3617	32.5184	-5.02319	0.000552297	0.00916916
g25696	7.81588	0.633172	14.9986	24.2462	-4.59969	0.00106711	0.014838
g25698	768.065	449.755	1086.38	2.41562	-1.27239	0.000133673	0.00310414
g25745	192.801	66.8742	318.728	4.76626	-2.25286	3.60304e-09	5.98684e-07
g25776	633.328	278.089	988.568	3.55502	-1.82986	0.00137909	0.0178841
g25811	53.4987	30.653	76.3445	2.49663	-1.31998	0.00415294	0.0400487
g25835	55.2717	9.41784	101.125	10.7106	-3.42097	1.11428e-07	1.01987e-05
g25870	131.734	65.6622	197.806	3.01207	-1.59076	0.000150806	0.00340002
g25894	12.4523	2.18655	22.718	10.4817	-3.3898	0.000548641	0.00912507
g25898	204.939	104.011	305.867	2.94198	-1.55679	4.7016e-05	0.00138536
g25901	9390.39	14063.8	4717.02	0.335403	1.57603	0.00107433	0.0148975
g25902	74.0827	31.5043	116.661	3.70807	-1.89067	3.95433e-05	0.00120129
g25912	257.857	512.802	2.91171	0.00565307	7.46675	6.84195e-09	9.83002e-07
g25915	652.321	920.722	383.92	0.416908	1.2622	0.000199541	0.00426524
g25932	125.357	71.788	178.926	2.49397	-1.31844	0.00386318	0.038071
g25947	231.814	111.592	352.036	3.1576	-1.65883	8.21615e-05	0.00213168
g25970	2017.61	2779.13	1256.09	0.451961	1.14573	0.0023602	0.0266943
g25974	94.3295	165.664	22.9946	0.138662	2.85035	1.43927e-05	0.000547311
g25979	119.796	208.273	31.3185	0.150428	2.73286	0.000213009	0.00449011
g25985	281.702	134.384	429.02	3.1942	-1.67545	3.21153e-05	0.00102793
g25992	2141.79	1417.38	2866.21	2.02232	-1.01601	0.000166659	0.00368163
g26012	144.697	204.086	85.3089	0.418059	1.25822	0.00387492	0.0381473
g26026	1024.63	407.366	1641.89	4.03107	-2.01116	4.04752e-05	0.00122087
g26032	147.992	18.3619	277.622	15.0185	-3.90867	6.11644e-25	2.9219e-21
g26039	114.642	47.9525	181.331	3.7757	-1.91674	0.000446519	0.0078099
g26040	704.301	397.696	1010.91	2.5419	-1.34591	0.0026812	0.029268
g26054	268.961	161.73	376.191	2.32578	-1.21772	0.00225805	0.0257599
g26063	989.664	597.52	1381.81	2.31264	-1.20954	0.000138646	0.0031881
g26129	256.901	129.353	384.448	2.97155	-1.57122	1.61957e-11	5.24535e-09
g26140	2098.07	1239.72	2956.43	2.38482	-1.25388	9.14953e-06	0.000382988
g26149	22051.7	30931.6	13171.7	0.425836	1.23163	3.99559e-16	4.12701e-13
g26165	76.6636	19.4188	133.908	6.87666	-2.78171	1.01138e-11	3.45108e-09
g26184	31.6665	5.52757	57.8054	10.4757	-3.38898	4.97605e-08	5.13972e-06
g26185	36.7674	17.1274	56.4073	3.30799	-1.72596	0.00102933	0.0144466
g26205	11202.5	3879.53	18525.4	4.77525	-2.25558	2.03666e-05	0.000716713
g26218	8474.13	3001.34	13946.9	4.647	-2.2163	1.95363e-05	0.000695823
g26222	8.28113	0	16.5623	97.881	-6.61296	9.24586e-06	0.000386596
g26264	59.273	35.1299	83.416	2.37729	-1.24931	0.00431979	0.041262
g26294	1389.62	861.002	1918.23	2.22829	-1.15594	0.000140551	0.00321836
g26297	224.601	130.275	318.927	2.44738	-1.29124	0.000547422	0.00911583
g26384	11.0513	2.0467	20.0559	9.59268	-3.26193	0.00145723	0.0186506
g26424	221.735	297.509	145.961	0.490466	1.02777	4.35849e-05	0.00130385
g26430	67.8544	12.4718	123.237	9.87266	-3.30344	0.00104495	0.0146034
g26434	24.6135	1.86997	47.357	25.4916	-4.67195	6.18043e-05	0.00172996
g26452	1319.93	480.484	2159.38	4.49457	-2.16818	3.66236e-05	0.00113587
g26467	49.8184	31.1099	68.5269	2.2002	-1.13764	0.00527757	0.0477154
g26508	102.407	65.4647	139.349	2.13137	-1.09178	0.00361898	0.0363486
g26544	314.095	490.351	137.838	0.281125	1.83072	8.2964e-05	0.00214758
g26550	714.08	1066.73	361.431	0.338849	1.56128	2.39412e-05	0.000816001
g26551	96.4333	145.258	47.6087	0.327783	1.60919	0.000690738	0.0107987
g26567	50.313	30.3512	70.2748	2.3157	-1.21145	0.00193125	0.0229856
g26644	32.6662	8.84376	56.4886	6.38087	-2.67375	0.000748725	0.011436
g26663	17.9664	32.7343	3.19849	0.0980255	3.3507	0.00114759	0.0156466
g26677	2019.95	3806.71	233.194	0.0612599	4.02891	9.75807e-05	0.00243741
g26730	276.223	183.296	369.15	2.01546	-1.01111	4.25554e-07	3.10684e-05
g26815	21.1116	10.3613	31.8619	3.06989	-1.61819	0.00243108	0.02731
g26821	55.9926	23.6495	88.3357	3.73716	-1.90194	1.42204e-05	0.000542918
g26856	152.468	81.1066	223.829	2.76071	-1.46504	6.65804e-06	0.000298373
g26860	49.4479	16.6323	82.2634	4.95254	-2.30817	5.13026e-06	0.000243255
g26892	153.982	98.0834	209.881	2.14017	-1.09772	5.20815e-05	0.00151131
g26905	93.1796	59.6106	126.749	2.12715	-1.08892	0.000320982	0.00607577
g26908	1342.16	842.026	1842.29	2.18761	-1.12935	0.00161831	0.0202301
g26911	11.7582	4.23168	19.2848	4.53305	-2.18048	0.00310516	0.032548
g26921	8.84129	1.26477	16.4178	13.1992	-3.72238	0.00241865	0.0272183
g26925	436.237	600.393	272.081	0.453158	1.14191	0.000608165	0.00986513
g26948	111.476	195.645	27.3077	0.139488	2.84179	0.00031767	0.00601942
g26951	203.486	301.782	105.19	0.348551	1.52056	0.000149688	0.00338498
g26953	337.681	482.045	193.318	0.401004	1.31831	2.28895e-06	0.000126412
g26990	1178.47	1577.4	779.543	0.49422	1.01678	0.00346478	0.0352346
g27000	29.1714	8.63118	49.7115	5.76912	-2.52835	0.0027875	0.0301699
g27005	9.21962	0.631597	17.8077	28.7339	-4.84468	0.000938133	0.0134481
g27013	72.5261	41.9755	103.077	2.45121	-1.29349	2.77477e-05	0.000918312
g27017	257.997	358.103	157.892	0.44085	1.18164	0.000728931	0.0112193
g27106	33.9689	49.6603	18.2774	0.368014	1.44217	0.00129484	0.0170814
g27158	74.7494	7.85555	141.643	18.0855	-4.17676	0.000140174	0.00321549
g27199	3969.75	2302.53	5636.96	2.44833	-1.2918	2.1132e-06	0.000118765
g27214	1027.31	1550.82	503.805	0.324897	1.62195	2.55433e-08	2.8967e-06
g27299	191.329	86.4237	296.234	3.42964	-1.77806	1.06407e-05	0.000433534
g27334	120.387	9.97285	230.802	22.9361	-4.51955	7.84151e-10	1.59404e-07
g27452	32.3834	8.44815	56.3187	6.71654	-2.74772	4.39623e-06	0.000212941
g27531	27.0957	42.4381	11.7533	0.277561	1.84912	0.0017004	0.0209356
g27558	265.079	42.492	487.666	11.4774	-3.52073	0.00459474	0.043208
g27588	1939.27	1263.3	2615.24	2.07032	-1.04985	0.000226639	0.00468852
g27618	206.551	300.178	112.923	0.376182	1.4105	0.00327594	0.033837
g27631	55.0523	76.0964	34.0082	0.447048	1.1615	0.00502131	0.0461963
g27734	45.6726	21.1712	70.1741	3.31349	-1.72835	0.00251621	0.0279676
g27779	17.0125	1.55181	32.4733	21.033	-4.39458	0.000294005	0.00568048
g280	56105.7	20563.4	91648	4.45686	-2.15603	8.1729e-07	5.47012e-05
g28030	110.366	67.884	152.848	2.25291	-1.17179	0.00393797	0.0385499
g28066	100.148	51.7217	148.575	2.87324	-1.52268	0.0023132	0.0263028
g28072	203.349	104.475	302.223	2.89394	-1.53303	0.000354202	0.00654572
g28114	9.99598	1.2104	18.7816	15.4458	-3.94914	0.00362584	0.0363984
g28195	59.6475	83.967	35.328	0.421016	1.24805	0.00082846	0.0122539
g28219	82.7644	21.8821	143.647	6.58154	-2.71843	6.28278e-05	0.00174879
g28261	8786.8	5614.12	11959.5	2.13032	-1.09107	5.42579e-10	1.15199e-07
g28265	327.973	199.141	456.805	2.29457	-1.19822	1.21773e-05	0.000483259
g28513	2105.16	2826.29	1384.03	0.489697	1.03004	8.99087e-06	0.000377172
g28533	131.667	86.6303	176.704	2.04029	-1.02878	0.000173138	0.00379912
g28553	122.555	49.7014	195.409	3.93286	-1.97558	0.000677199	0.0106636
g28559	402.824	263.368	542.28	2.05941	-1.04223	0.000951913	0.0135946
g28561	87.5115	147.492	27.5309	0.186712	2.42111	3.8131e-08	4.11653e-06
g286	2515.51	1173.63	3857.38	3.28701	-1.71677	8.26071e-07	5.49999e-05
g28658	4.29485	0.316586	8.27312	25.1009	-4.64967	0.00384277	0.0379481
g28748	2777.4	1747	3807.79	2.17975	-1.12416	3.15976e-06	0.000163627
g28787	17.5236	4.91449	30.1327	6.13956	-2.61814	2.80664e-05	0.000924269
g288	216.698	373.999	59.3981	0.15878	2.6549	4.17144e-08	4.44067e-06
g28848	147.791	221.377	74.206	0.334971	1.57789	2.26189e-06	0.000125461
g2886	666.246	1010.28	322.214	0.319023	1.64827	6.38827e-09	9.28291e-07
g28872	175.97	263.235	88.7048	0.336767	1.57018	2.44525e-05	0.000829195
g28892	765.312	1210.08	320.545	0.264889	1.91654	6.51564e-06	0.000293642
g28931	133.503	184.12	82.8851	0.450011	1.15197	0.00175767	0.0214336
g28932	99.846	153.002	46.6905	0.305224	1.71206	5.45267e-05	0.00157468
g28933	60.7135	110.635	10.7915	0.0973033	3.36137	5.84641e-09	8.66016e-07
g28934	259.741	359.669	159.812	0.444108	1.17102	0.000161393	0.00359229
g29003	30.3035	52.6746	7.93243	0.150164	2.73539	0.000496863	0.00845818
g29004	921.855	1255.73	587.976	0.468158	1.09493	0.000136984	0.00316131
g29008	54.1603	95.7916	12.529	0.130678	2.93591	6.23828e-09	9.16956e-07
g29009	427.786	608.3	247.273	0.406407	1.299	5.34682e-05	0.00154568
g29029	1910.7	1244.54	2576.86	2.07052	-1.04999	0.00106732	0.014838
g29035	806.611	1079.06	534.159	0.495109	1.01418	0.00114682	0.0156417
g29038	126.548	45.219	207.877	4.59449	-2.1999	2.15039e-08	2.52956e-06
g29048	69.529	12.6381	126.42	10.0081	-3.32309	0.000312256	0.00594002
g29077	32.3887	11.8059	52.9714	4.47462	-2.16177	0.00377537	0.0374275
g29078	259.497	159.189	359.806	2.2615	-1.17728	1.08216e-05	0.000438567
g29079	308.543	440.985	176.101	0.399425	1.324	9.46741e-05	0.00237568
g29085	148.073	95.7799	200.367	2.09018	-1.06363	0.00059574	0.00970891
g291	555.065	323.635	786.495	2.43138	-1.28178	1.40998e-06	8.52614e-05
g29101	3936.16	2352.05	5520.27	2.34717	-1.23092	2.26945e-06	0.000125516
g29131	137.976	74.3331	201.619	2.71616	-1.44157	3.66888e-05	0.00113587
g2918	486.025	726.265	245.785	0.338536	1.56262	2.712e-08	3.05914e-06
g292	1011.23	636.217	1386.24	2.17926	-1.12384	4.69317e-09	7.32077e-07
g29208	1490.08	971.001	2009.17	2.06928	-1.04913	0.000242639	0.00492455
g29213	114.435	53.6845	175.186	3.26294	-1.70617	3.00149e-05	0.000972102
g29232	523.086	303.85	742.321	2.4435	-1.28895	1.11462e-07	1.01987e-05
g29240	292.122	424.161	160.083	0.377204	1.40658	2.52389e-09	4.42456e-07
g29262	232.375	149.629	315.122	2.10605	-1.07454	8.48986e-06	0.000358516
g29275	476.32	273.631	679.009	2.48124	-1.31106	4.16452e-07	3.04895e-05
g29286	318.324	463.853	172.795	0.372372	1.42518	2.02611e-07	1.66163e-05
g29334	2318.74	1396.47	3241	2.321	-1.21475	6.02519e-08	6.0596e-06
g29340	108.599	198.62	18.5777	0.0935301	3.41843	7.93487e-05	0.00208561
g29341	66.8004	25.6154	107.985	4.21218	-2.07457	0.00167067	0.0206715
g29342	29.7072	45.1048	14.3096	0.316793	1.65839	0.00358195	0.0360526
g29354	70.3321	133.197	7.46661	0.0561566	4.1544	1.43565e-07	1.2642e-05
g29364	2387.31	1081.39	3693.23	3.41542	-1.77206	0.000577767	0.00947662
g29396	118.653	31.6264	205.679	6.507	-2.70199	0.000842574	0.012404
g29411	66.6517	7.97161	125.332	15.7213	-3.97465	3.35157e-05	0.00106296
g29412	143.571	78.7837	208.359	2.6448	-1.40316	0.00273608	0.029782
g29452	75.434	21.0429	129.825	6.17245	-2.62584	0.00440937	0.0418769
g29481	1676.48	997.332	2355.62	2.36173	-1.23985	1.05159e-06	6.68694e-05
g29515	493.99	824.989	162.991	0.197592	2.33941	4.05127e-06	0.000197989
g29542	195.341	72.2839	318.398	4.41087	-2.14106	2.89881e-11	8.86271e-09
g29566	39.933	0.631597	79.2344	129.098	-7.01233	1.39719e-10	3.51292e-08
g29583	59.2305	79.0184	39.4427	0.498971	1.00297	0.00173148	0.0211954
g29588	641.222	950.042	332.403	0.349864	1.51513	1.13596e-14	7.61629e-12
g29592	399.007	232.987	565.028	2.42551	-1.27829	1.26237e-06	7.76879e-05
g29593	4631.24	6205.7	3056.79	0.492575	1.02158	1.39266e-06	8.44813e-05
g29596	102.78	159.97	45.5896	0.285141	1.81025	1.94731e-05	0.000694219
g29608	1285.13	1834.83	735.436	0.400842	1.3189	0.000231113	0.00475886
g297	47240.2	20400.1	74080.3	3.63139	-1.86052	3.50264e-06	0.000176364
g29728	36.5508	16.0745	57.027	3.52811	-1.8189	0.00314742	0.0328737
g29730	25.7798	45.8157	5.74382	0.125388	2.99553	0.00423027	0.0406072
g29753	102.177	25.2777	179.076	7.08582	-2.82493	0.00181884	0.022004
g29754	41.0695	14.823	67.3159	4.54642	-2.18473	0.00189002	0.0225898
g29764	148.993	32.5852	265.401	8.15173	-3.02711	1.29648e-05	0.000504045
g29788	2171.9	3070.95	1272.85	0.414515	1.2705	2.8104e-07	2.18303e-05
g29790	1438.83	2301.74	575.922	0.250212	1.99877	0.000219573	0.00457796
g29791	28.4883	46.6201	10.3564	0.222149	2.1704	0.000774103	0.011703
g29793	593.042	969.449	216.634	0.223474	2.16182	4.97382e-06	0.000237309
g29794	341.368	605.721	77.0154	0.127195	2.97488	3.34456e-12	1.25313e-09
g29796	84.1468	120.194	48.0996	0.40068	1.31948	0.00028932	0.00560982
g29798	317.435	539.393	95.4761	0.177054	2.49774	9.5619e-08	9.06767e-06
g29806	185.173	44.6645	325.681	7.29536	-2.86698	9.83809e-05	0.00245419
g29812	62.1425	29.4828	94.8022	3.22122	-1.68761	0.000585256	0.00957069
g29815	422.782	227.382	618.182	2.71963	-1.44341	0.00159	0.0199688
g29840	1021.23	1505.29	537.164	0.356821	1.48673	0.000264165	0.00526082
g29856	29.1302	46.4949	11.7655	0.252897	1.98338	0.00449638	0.0425469
g29870	29.7421	52.244	7.24011	0.137861	2.85872	1.59822e-06	9.46962e-05
g29879	571.932	814.962	328.901	0.40356	1.30914	5.96092e-08	6.01078e-06
g29888	38.1388	19.3122	56.9655	2.95049	-1.56095	0.0011145	0.0153322
g29917	273.001	400.667	145.335	0.362611	1.4635	0.000671238	0.0106025
g29965	67395.5	43260.9	91530	2.11578	-1.08119	5.33473e-09	8.16862e-07
g29969	151.385	58.2344	244.536	4.20197	-2.07106	0.00176641	0.0215127
g29971	126.169	61.5147	190.824	3.10435	-1.63429	0.00486173	0.044988
g29972	428.879	263.905	593.854	2.25104	-1.17059	0.000743064	0.0113864
g29990	177.617	61.0244	294.209	4.82258	-2.26981	0.00279599	0.0302265
g29996	4000.33	6104.76	1895.91	0.310563	1.68704	4.00363e-06	0.000196211
g30	9.2366	1.81403	16.6592	9.11389	-3.18807	0.00214464	0.0248821
g30009	1905.67	1076.46	2734.88	2.5406	-1.34517	9.47447e-05	0.00237589
g30026	67.742	39.7062	95.7779	2.41377	-1.27129	0.0044001	0.0418305
g30038	168.598	104.967	232.228	2.21061	-1.14445	5.61917e-05	0.00160974
g30041	997.829	661.873	1333.79	2.0155	-1.01114	9.92604e-05	0.00246852
g30050	88.1942	30.7521	145.636	4.73605	-2.24368	0.000491924	0.00842221
g30068	32.2667	12.0857	52.4477	4.35095	-2.12133	0.000799979	0.0119518
g30070	126.942	20.8836	233.001	11.1317	-3.4766	4.79684e-12	1.7627e-09
g30081	232.089	120.275	343.902	2.86111	-1.51657	7.45665e-05	0.0019942
g30087	19.512	36.4909	2.53312	0.0691189	3.85478	0.000536724	0.00898073
g30093	1275.86	637.259	1914.45	3.00456	-1.58716	0.00203235	0.0238912
g30128	317.719	517.782	117.655	0.227233	2.13776	1.53161e-07	1.33031e-05
g30129	86.6112	130.868	42.3545	0.32383	1.62669	0.00134898	0.0176113
g30139	531.295	220.156	842.433	3.82785	-1.93653	1.80681e-05	0.000654511
g30144	152.036	90.3345	213.738	2.36913	-1.24436	1.315e-05	0.000509174
g30150	527.159	706.079	348.238	0.493095	1.02006	0.0054803	0.0490149
g30156	143.798	200.412	87.1841	0.435057	1.20072	0.00477514	0.0444451
g30161	73796.9	47549.4	100044	2.10402	-1.07315	3.18477e-06	0.000164476
g30168	3312.48	4948.81	1676.14	0.338692	1.56195	3.88373e-05	0.0011855
g3019	87.757	141.009	34.5054	0.244458	2.03234	0.00032951	0.00620034
g30201	755.43	1376.41	134.455	0.0976763	3.35585	5.16533e-08	5.29232e-06
g3024	4.79747	0	9.59494	56.775	-5.82718	0.00089807	0.0130417
g30252	197.247	310.631	83.8633	0.269868	1.88967	0.00195567	0.0232039
g30255	111.184	169.99	52.3775	0.307911	1.69941	0.00504619	0.0462898
g3032	282.09	69.1777	495.002	7.15905	-2.83977	2.24967e-17	3.30675e-14
g30335	10.023	2.815	17.2309	6.17784	-2.6271	0.00355428	0.0358874
g30350	351.48	489.841	213.12	0.435009	1.20088	0.000657194	0.0104398
g30351	1267.44	1819.24	715.649	0.393371	1.34604	0.000248003	0.00500154
g30367	667.168	381.259	953.077	2.50003	-1.32195	2.42812e-05	0.000824848
g30376	241.548	160.273	322.823	2.01445	-1.01039	0.00168717	0.020813
g30387	21.0593	38.2169	3.90174	0.102532	3.28586	5.82816e-05	0.00164745
g30390	609.783	339.375	880.192	2.59419	-1.37528	9.96414e-05	0.00247404
g30398	3603.22	1297.37	5909.06	4.55492	-2.18743	3.5664e-06	0.000179338
g3040	20.1076	5.20783	35.0075	6.72428	-2.74938	0.00141943	0.0182647
g30402	414.994	747.824	82.1652	0.109851	3.18637	1.67825e-06	9.85215e-05
g30405	1683.54	873.675	2493.41	2.85408	-1.51302	0.00257491	0.0284491
g30409	402.62	261.823	543.417	2.07556	-1.0535	0.000327517	0.00617196
g30417	597.891	314.436	881.346	2.80432	-1.48765	4.39657e-14	2.58853e-11
g3042	72.6551	43.6362	101.674	2.33097	-1.22093	0.000335154	0.00627565
g30429	334.573	130.211	538.936	4.14082	-2.04992	2.00603e-05	0.000708545
g30446	4.47067	0.316586	8.62475	26.1712	-4.70991	0.00312545	0.0326889
g30454	354.577	165.29	543.864	3.29221	-1.71906	1.28043e-05	0.000501889
g30487	239.985	325.718	154.251	0.473413	1.07883	2.26872e-06	0.000125516
g30496	35.4723	61.6153	9.32928	0.151302	2.7245	0.000850351	0.0124883
g30535	270.082	445.801	94.3633	0.211635	2.24035	4.80389e-05	0.00141115
g30545	28.8561	12.3168	45.3954	3.69066	-1.88388	0.00481687	0.044692
g30573	4.08134	8.16269	0	0.0242543	5.36562	0.00469033	0.0438694
g30583	126.093	71.4282	180.758	2.52727	-1.33758	0.000744782	0.0114025
g30588	134.301	66.4714	202.13	3.04297	-1.60548	0.00545419	0.0488835
g30628	77.2899	4.6633	149.917	32.2743	-5.01231	8.77999e-08	8.38862e-06
g30630	294.779	122.149	467.409	3.82633	-1.93596	0.00116846	0.015852
g30661	107.686	30.5692	184.802	6.05753	-2.59873	6.16946e-06	0.000281023
g30666	31.9814	51.4217	12.5412	0.243477	2.03814	0.00170578	0.0209709
g30667	846.528	1165.09	527.971	0.453253	1.14161	0.000371696	0.00679024
g30683	2891.3	4183.52	1599.08	0.382248	1.38742	1.22889e-06	7.61173e-05
g30699	118.188	28.3014	208.075	7.34412	-2.87659	0.000269031	0.0053162
g30700	301.748	519.492	84.0031	0.161684	2.62876	8.07643e-07	5.41503e-05
g30701	374.575	543.855	205.294	0.377391	1.40587	2.33046e-05	0.000801648
g30704	733.485	979.864	487.106	0.497077	1.00846	0.000552912	0.00917128
g3071	269.388	438.757	100.02	0.227991	2.13295	8.38357e-05	0.0021663
g30751	90.023	56.2348	123.811	2.20013	-1.13759	0.00287957	0.0308865
g30763	267.58	404.917	130.244	0.321613	1.6366	0.00023494	0.00481948
g30765	200.707	271.139	130.274	0.480618	1.05704	0.000150633	0.00340002
g30783	301.573	105.298	497.849	4.72869	-2.24144	1.04705e-05	0.000427513
g30787	810.354	535.669	1085.04	2.02573	-1.01844	0.00266679	0.029169
g30805	33.7716	6.97064	60.5726	8.67076	-3.11616	0.00187274	0.0224454
g30807	31.5581	9.01576	54.1005	5.9763	-2.57925	0.00189537	0.0226361
g30809	389.621	544.341	234.901	0.431601	1.21223	0.0020653	0.0242041
g3081	26.7553	45.2362	8.27439	0.182503	2.454	0.000205537	0.00436632
g30821	49.4112	11.1142	87.7082	7.89869	-2.98161	0.000463895	0.00806216
g30826	928.472	331.885	1525.06	4.59615	-2.20043	2.75158e-06	0.000145757
g30834	1123.47	727.388	1519.55	2.08909	-1.06287	0.00198711	0.0234749
g30848	35.1582	50.997	19.3193	0.378332	1.40227	0.00494282	0.0456059
g30850	1653.34	839.237	2467.44	2.94063	-1.55613	1.67108e-07	1.42811e-05
g30872	75.661	14.1002	137.222	9.74691	-3.28495	0.00202117	0.0237963
g30876	1530.69	2218.76	842.626	0.379748	1.39689	0.00113063	0.0155094
g30882	250.715	392.705	108.724	0.27672	1.8535	1.68038e-05	0.000619279
g30905	113.28	167.247	59.3132	0.354686	1.49539	2.18916e-07	1.77252e-05
g30914	31.7874	59.3138	4.261	0.0721311	3.79324	9.37171e-06	0.000390577
g30916	506.526	225.05	788.002	3.50362	-1.80885	1.21229e-09	2.37589e-07
g30920	4455.74	2006.98	6904.5	3.44028	-1.78253	4.8142e-08	5.01319e-06
g30922	213.308	349.578	77.0382	0.220339	2.18221	7.44758e-05	0.0019942
g30947	101.259	38.3073	164.21	4.27852	-2.09711	5.02332e-09	7.77231e-07
g30976	10.8548	19.9387	1.77086	0.0892554	3.48592	0.00521532	0.0473041
g30977	206.871	49.8058	363.936	7.31365	-2.87059	7.13989e-09	1.01815e-06
g30981	36.6124	15.1629	58.0619	3.83512	-1.93927	0.00224251	0.025644
g30995	1079.94	650.68	1509.19	2.31974	-1.21397	5.40579e-07	3.8258e-05
g30998	207.408	294.35	120.466	0.409459	1.28821	3.66321e-06	0.000182764
g310	322.669	195.505	449.832	2.30046	-1.20193	1.4631e-07	1.28246e-05
g31094	345.996	69.2449	622.747	8.99334	-3.16886	3.23537e-09	5.44696e-07
g31104	2135.74	1379.78	2891.69	2.09573	-1.06745	0.000112729	0.00272812
g31112	99.5096	42.3429	156.676	3.70519	-1.88955	2.77374e-05	0.000918312
g31122	820.039	517.978	1122.1	2.16685	-1.1156	1.19999e-05	0.000477709
g31123	1283.64	529.018	2038.27	3.85312	-1.94603	0.000190394	0.00410625
g31138	1011.96	466.398	1557.51	3.33983	-1.73977	3.54276e-05	0.0011116
g31150	17.4522	3.57053	31.3338	8.66098	-3.11453	0.000102837	0.00253378
g31167	120.208	56.8005	183.615	3.23144	-1.69218	0.00114449	0.0156322
g31168	793.136	254.258	1332.01	5.24013	-2.3896	2.31979e-07	1.87037e-05
g3117	24.1727	9.23323	39.1121	4.24313	-2.08513	0.000172418	0.0037894
g31175	436.574	141.663	731.485	5.16546	-2.3689	5.79324e-05	0.00164
g31185	1164.63	671.84	1657.43	2.46752	-1.30306	7.46797e-08	7.29932e-06
g31186	4573.75	2674.41	6473.1	2.42045	-1.27527	2.38887e-05	0.000815866
g31192	276.147	76.2352	476.058	6.25369	-2.64471	2.48006e-18	4.12089e-15
g31194	1209.15	715.465	1702.84	2.38073	-1.2514	1.27724e-08	1.65465e-06
g31220	60.8801	27.9383	93.8219	3.36026	-1.74857	0.00536165	0.0482359
g31263	687.539	385.147	989.93	2.57079	-1.36221	5.16829e-05	0.00150317
g31283	1098.76	570.347	1627.18	2.85332	-1.51264	8.22718e-06	0.000352882
g31291	847.586	487.946	1207.23	2.47457	-1.30718	5.26561e-06	0.00024795
g31292	280.979	171.636	390.322	2.27514	-1.18595	3.95741e-06	0.000194897
g31305	52.4322	79.5799	25.2846	0.317969	1.65304	0.000354061	0.00654572
g31333	99.6841	28.2077	171.16	6.07205	-2.60218	0.000792548	0.0118786
g31345	5583.17	2015.67	9150.68	4.54004	-2.18271	1.56649e-14	1.00234e-11
g31346	4856.17	1642.27	8070.08	4.91428	-2.29698	7.2108e-12	2.57547e-09
g31348	8.37463	0.316586	16.4327	49.8359	-5.63911	0.00121755	0.0163294
g31352	835.021	493.358	1176.68	2.38505	-1.25402	7.60562e-05	0.00202272
g31370	845.002	522.154	1167.85	2.23696	-1.16154	3.78659e-09	6.18428e-07
g31378	863.681	306.813	1420.55	4.62882	-2.21064	2.33633e-09	4.13369e-07
g31406	29.2382	16.5654	41.9109	2.53152	-1.34	0.00311	0.0325719
g31463	37.301	56.2188	18.3832	0.326243	1.61598	0.00275763	0.0299399
g31488	15.0005	3.57053	26.4305	7.30927	-2.86973	0.000280471	0.00548274
g31490	765.614	346.457	1184.77	3.42141	-1.77459	1.00868e-13	5.35716e-11
g3151	10.9414	0	21.8827	129.373	-7.01539	8.26001e-07	5.49999e-05
g3153	23.1437	7.41763	38.8698	5.26406	-2.39617	3.64305e-05	0.00113262
g31549	103.181	50.622	155.74	3.07779	-1.6219	0.00380154	0.0376187
g31592	7503.57	4394.25	10612.9	2.41519	-1.27214	1.07946e-08	1.42747e-06
g31619	182.861	264.626	101.095	0.382129	1.38787	6.69973e-05	0.00184337
g31625	208.189	59.4257	356.953	6.00905	-2.58714	9.21869e-05	0.00232548
g31638	768.123	352.379	1183.87	3.36033	-1.7486	1.29057e-05	0.00050332
g31665	1907.71	1271.54	2543.89	2.0008	-1.00058	0.00490694	0.0453406
g31666	131.789	21.6697	241.908	11.1699	-3.48154	0.000138972	0.00319301
g3169	12.624	1.23522	24.0129	19.5617	-4.28996	5.43908e-06	0.000253494
g31693	167.455	82.0742	252.836	3.08196	-1.62385	0.000487606	0.00835642
g31732	97.0755	21.7848	172.366	7.91852	-2.98523	0.00184559	0.0222432
g3174	1307.85	800.085	1815.61	2.26951	-1.18238	0.00309264	0.0325116
g3175	358.765	210.32	507.209	2.41206	-1.27026	0.00244478	0.0273994
g31765	22.6785	8.56107	36.796	4.2936	-2.10219	0.00325094	0.0336514
g31766	61.3717	27.9523	94.7911	3.38449	-1.75894	4.10101e-05	0.00123603
g31773	353.099	163.077	543.122	3.33142	-1.73614	2.82513e-05	0.000928359
g31886	14.9781	4.30929	25.647	5.95745	-2.57469	0.00207035	0.0242484
g31909	18.7052	2.49369	34.9167	14.0982	-3.81744	0.000156625	0.00350657
g3199	12.1532	23.2439	1.06252	0.0460271	4.44137	0.000403912	0.00724029
g32332	7.585	0.315011	14.855	45.0631	-5.49387	0.00111615	0.0153439
g32357	35.2961	8.867	61.7252	6.95513	-2.79808	2.70254e-05	0.000899677
g32358	35.4244	6.33014	64.5188	10.2348	-3.35541	0.00444896	0.0421692
g32449	62.629	95.6404	29.6175	0.309925	1.69001	0.00411176	0.0398426
g32526	3551.67	2056.78	5046.57	2.45376	-1.29499	0.000273678	0.00538299
g32551	9424.35	6020.72	12828	2.13064	-1.09129	2.95339e-07	2.28945e-05
g32557	1746.31	1109.47	2383.16	2.14803	-1.10302	1.51273e-06	9.01903e-05
g32562	11320.5	6859.42	15781.7	2.30072	-1.20209	5.34685e-06	0.000251033
g32606	10.5113	20.6549	0.367652	0.0186113	5.74768	0.000749152	0.011436
g32681	309.483	56.5909	562.375	9.93605	-3.31267	0.00275205	0.0299048
g328	403.924	254.007	553.842	2.18054	-1.12469	0.000649439	0.0103674
g32807	103.989	205.485	2.49269	0.0121419	6.36386	0.000688855	0.0107849
g32809	392.186	783.651	0.720551	0.000918263	10.0888	0.00033724	0.00629865
g32813	122.745	244.429	1.06124	0.00435222	7.84403	0.00254685	0.0282289
g32815	205.404	406.51	4.2989	0.0105748	6.56323	1.76423e-05	0.00064274
g32909	567.661	360.609	774.714	2.14815	-1.1031	0.00279781	0.0302301
g32919	194.599	95.6737	293.523	3.0683	-1.61744	0.000726883	0.0111968
g3296	2308.05	3205.76	1410.33	0.439907	1.18473	9.14541e-05	0.00231157
g3309	84.406	16.4883	152.324	9.26739	-3.21216	7.29714e-08	7.15063e-06
g33092	176.458	323.267	29.6494	0.0917154	3.44669	0.00309403	0.0325116
g33093	149.832	274.634	25.0298	0.0911325	3.45589	0.00426239	0.0408363
g33148	62.5939	121.975	3.21324	0.0263691	5.24501	4.35417e-07	3.16356e-05
g33248	7983.77	10675.2	5292.31	0.495756	1.0123	0.000993907	0.0140682
g33252	21.3994	0.288614	42.5103	128.988	-7.01109	1.23355e-07	1.10924e-05
g33264	73.9489	31.8669	116.031	3.64364	-1.86538	0.00554269	0.0494339
g33267	93.3891	27.5756	159.203	5.77275	-2.52926	1.17199e-06	7.34262e-05
g333	6622.13	3928.52	9315.75	2.37132	-1.24569	1.07413e-05	0.000436523
g33324	4.15742	0	8.31483	49.1206	-5.61826	0.00145642	0.0186465
g33325	38.2723	11.578	64.9667	5.60354	-2.48634	0.000405558	0.00726299
g33328	90.3864	58.9512	121.822	2.06832	-1.04846	0.00408555	0.0396426
g33389	20.0549	35.4934	4.61645	0.130388	2.93912	0.00550375	0.0491671
g33395	164.388	237.223	91.5543	0.386223	1.37249	0.00026405	0.00526082
g33438	24.8145	13.3483	36.2808	2.70867	-1.43758	0.00564329	0.0499698
g33473	88.9959	4.34829	173.643	40.0047	-5.3221	0.000271768	0.00535822
g33474	131.336	2.04827	260.623	125.962	-6.97684	8.51143e-06	0.00035903
g33477	557.866	56.8593	1058.87	18.638	-4.22017	2.88486e-12	1.11364e-09
g33486	550.623	286.288	814.959	2.84661	-1.50925	0.000260889	0.00521465
g33562	66.6498	25.1408	108.159	4.31643	-2.10984	2.49536e-06	0.000135078
g33586	165.506	108.676	222.336	2.04507	-1.03215	0.000516002	0.00871796
g33590	21.1468	4.98879	37.3048	7.39912	-2.88735	0.00317891	0.0331031
g33698	2148.51	1371.03	2925.99	2.13421	-1.0937	1.71813e-05	0.000630758
g3372	114.419	25.36	203.478	8.03483	-3.00627	1.67547e-07	1.42811e-05
g33750	48.253	68.9436	27.5624	0.399695	1.32303	0.00561707	0.04983
g33787	10.6105	1.52699	19.6941	12.8774	-3.68677	0.000159756	0.00356206
g33812	270.675	99.8242	441.527	4.42544	-2.14582	0.000833041	0.012293
g33821	123.342	81.3503	165.334	2.03276	-1.02344	0.00515815	0.046969
g33866	417.606	242.455	592.758	2.44444	-1.2895	1.32413e-05	0.000512188
g33880	3326.88	2094.9	4558.86	2.17634	-1.1219	2.08965e-06	0.000117614
g33892	1239.76	592.167	1887.35	3.18726	-1.67232	2.80313e-10	6.41481e-08
g33927	37.8374	55.6175	20.0572	0.360785	1.47079	0.000779807	0.0117608
g33978	964.275	596.515	1332.03	2.23252	-1.15867	0.00420856	0.0404931
g33983	2091.74	997.137	3186.34	3.19504	-1.67583	2.53412e-07	2.02185e-05
g340	46.2135	19.3313	73.0957	3.79108	-1.92261	0.00305365	0.0322469
g34008	2026.18	1266.41	2785.96	2.20014	-1.1376	0.000595482	0.00970885
g34010	652.342	325.959	978.725	3.00339	-1.58659	6.03561e-15	4.27154e-12
g34013	254.489	139.863	369.116	2.64183	-1.40154	3.12979e-06	0.000162295
g34017	22686.7	9395.28	35978.1	3.82942	-1.93712	1.04593e-05	0.000427512
g34024	330.005	187.856	472.155	2.5151	-1.33062	0.00121711	0.0163294
g34046	77.6868	41.6441	113.73	2.72986	-1.44883	0.00454748	0.0428584
g34051	1817.84	1142.32	2493.36	2.18284	-1.1262	3.14136e-05	0.00100885
g34093	2011.98	2767.15	1256.82	0.454166	1.13871	0.00219043	0.0252012
g34095	264.987	486.628	43.345	0.0890484	3.48927	0.00228905	0.0260824
g34102	299.653	474.238	125.067	0.263795	1.92251	0.00471495	0.0440661
g34122	252.276	390.71	113.842	0.291261	1.77961	0.00473816	0.0442085
g34123	264.327	171.278	357.376	2.08641	-1.06102	0.00350969	0.0355372
g34124	10.6201	2.50157	18.7387	7.56003	-2.91839	0.00151131	0.019195
g34125	154.385	62.5813	246.189	3.93801	-1.97747	0.00225622	0.0257468
g34127	14.225	1.20725	27.2428	22.4359	-4.48774	0.00111943	0.0153724
g34140	776.031	1057.7	494.36	0.467275	1.09766	3.77879e-07	2.8285e-05
g34141	588.951	867.051	310.851	0.358465	1.48009	0.00025027	0.00503663
g34142	2267.01	3597.43	936.6	0.260335	1.94156	6.4043e-06	0.000289992
g34147	395.237	48.876	741.597	15.1735	-3.92349	0.00269284	0.0293616
g34157	756.531	1124	389.064	0.34605	1.53095	6.65825e-09	9.6022e-07
g34170	1262.01	1748.61	775.422	0.443389	1.17336	0.00248761	0.0277411
g34177	105.021	44.3604	165.681	3.73714	-1.90194	0.000403754	0.00724029
g34185	443.629	97.5304	789.728	8.10076	-3.01806	5.32353e-11	1.50703e-08
g34198	2210.46	2995.43	1425.49	0.475898	1.07128	0.000670983	0.0106025
g342	9678.37	14072.8	5283.97	0.375471	1.41323	0.000849479	0.0124816
g34209	1973.24	1246.49	2699.99	2.16611	-1.11511	1.01872e-07	9.58924e-06
g34223	19.72	38.7329	0.707072	0.0184135	5.7631	8.32649e-06	0.000354358
g34227	200.208	97.5187	302.897	3.10884	-1.63638	0.00104395	0.0146034
g34254	202.193	85.6354	318.75	3.72454	-1.89706	0.00212326	0.0247015
g34283	30551.3	13288.2	47814.3	3.59829	-1.84731	1.15679e-08	1.5192e-06
g34284	66.2198	24.1059	108.334	4.5	-2.16992	5.06638e-05	0.0014769
g34294	720.078	336.685	1103.47	3.27864	-1.7131	8.0017e-10	1.61799e-07
g34299	34.3197	18.2196	50.4197	2.7754	-1.47269	0.000965947	0.0137693
g34304	216.199	99.3677	333.03	3.35346	-1.74565	0.00110175	0.0152005
g34314	320.6	453.78	187.421	0.412867	1.27625	0.000494246	0.00843995
g3436	1561.23	2159.13	963.328	0.446147	1.16441	3.47509e-06	0.000176137
g34390	51.1169	72.2473	29.9865	0.415792	1.26607	0.00220309	0.0253295
g34391	103.002	165.742	40.2628	0.243046	2.0407	0.000266743	0.0052929
g34402	119.766	54.8827	184.648	3.36393	-1.75015	0.00560096	0.0497795
g34403	1419.46	2022.41	816.505	0.403752	1.30846	1.08496e-07	1.00397e-05
g34417	6.49557	12.9911	0	0.0152088	6.03895	0.00547951	0.0490149
g34418	6.11772	12.2354	0	0.016127	5.95438	0.00047153	0.00815291
g34449	39561	25243.2	53878.8	2.1344	-1.09383	4.72742e-09	7.34422e-07
g34450	111.609	48.5635	174.655	3.60388	-1.84955	2.40535e-08	2.76052e-06
g34464	585.877	915.738	256.017	0.279502	1.83907	1.27367e-05	0.000500031
g34468	1014.47	1787.53	241.41	0.135036	2.88859	5.14318e-15	3.70862e-12
g34469	5897.59	9062.95	2732.24	0.301471	1.72991	1.06993e-05	0.00043546
g34473	119.177	35.4962	202.857	5.71614	-2.51504	0.0015019	0.0191073
g34531	991.072	1361.76	620.383	0.455555	1.1343	2.37409e-11	7.43692e-09
g34533	350.525	67.2785	633.772	9.42176	-3.236	0.0025073	0.02792
g34538	33.709	5.46217	61.9559	11.2911	-3.49711	3.20255e-09	5.41556e-07
g34547	696.105	398.068	994.143	2.49772	-1.32061	0.000704448	0.0109648
g34551	315.235	129.871	500.599	3.85612	-1.94715	7.71666e-05	0.00204404
g34554	396.974	261.633	532.315	2.03556	-1.02542	0.00188012	0.0225031
g34557	49.2913	82.7717	15.8109	0.190715	2.39051	7.79487e-05	0.00206157
g34560	62.3626	27.9556	96.7696	3.46456	-1.79267	1.45303e-06	8.71747e-05
g34564	710.092	163.137	1257.05	7.70563	-2.94591	0.00254314	0.0282041
g34575	138.883	44.8539	232.912	5.1964	-2.37751	1.79308e-05	0.000652007
g34585	643.891	410.488	877.294	2.13756	-1.09597	0.00432942	0.0413127
g34587	30.8795	49.5323	12.2268	0.246376	2.02106	0.00246505	0.027562
g34596	239.573	151.759	327.387	2.15533	-1.10791	0.000523545	0.00881813
g34626	433.897	275.092	592.701	2.15429	-1.10721	3.04104e-07	2.35262e-05
g34677	769.144	292.881	1245.41	4.25405	-2.08884	2.1787e-18	3.96493e-15
g34688	558.153	776.328	339.977	0.437943	1.19118	0.00136531	0.0177436
g34712	120.84	213.988	27.6928	0.129527	2.94868	1.92346e-06	0.000110374
g34731	281.854	182.882	380.826	2.0831	-1.05873	0.00545822	0.048886
g34739	33160.3	9766.63	56553.9	5.79058	-2.53371	2.15115e-08	2.52956e-06
g34745	2289.15	1235.77	3342.52	2.70469	-1.43546	2.73923e-05	0.000911097
g34756	5.03	0	10.06	59.4676	-5.89403	0.000492691	0.00842221
g34766	216.241	30.1622	402.32	13.3476	-3.73851	0.00289422	0.0309663
g34769	206.157	26.8047	385.509	14.3894	-3.84693	3.61076e-08	3.92024e-06
g34770	301.872	537.544	66.201	0.123183	3.02113	2.10894e-07	1.7112e-05
g34772	33.6085	13.6855	53.5314	3.92032	-1.97097	0.00370595	0.0369599
g34773	34.9286	59.5046	10.3526	0.174286	2.52047	2.03562e-07	1.66585e-05
g34779	130.957	202.384	59.5302	0.294165	1.7653	0.000557964	0.00924705
g34783	172.557	44.4705	300.644	6.76108	-2.75725	8.4471e-05	0.00217796
g34785	64.5324	13.7925	115.272	8.3587	-3.06328	9.78527e-07	6.3063e-05
g34795	64.6013	17.0945	112.108	6.5539	-2.71235	0.00169504	0.020883
g34878	148.819	84.4649	213.173	2.52408	-1.33576	0.00135759	0.0176834
g34931	414.119	265.592	562.645	2.11872	-1.08319	0.000332012	0.00623329
g34938	12.6629	24.9581	0.367652	0.0154187	6.01917	0.00151504	0.0192232
g34942	27.5671	11.1079	44.0263	3.97172	-1.98977	0.00147489	0.0188452
g34944	140.812	45.7783	235.846	5.15456	-2.36585	1.67577e-07	1.42811e-05
g34949	2250.62	959.124	3542.12	3.69337	-1.88494	1.75016e-07	1.47651e-05
g34950	42521.5	24810.4	60232.6	2.42772	-1.2796	2.35927e-07	1.8982e-05
g34980	11.5885	21.7346	1.44238	0.0660656	3.91996	0.000198965	0.00426328
g34988	1534.36	2108.09	960.638	0.455646	1.13402	7.69827e-08	7.48613e-06
g3499	17.309	31.7749	2.84304	0.0896274	3.47992	0.000291284	0.00564502
g34998	1796.52	1173.38	2419.65	2.0622	-1.04418	0.000240983	0.00491445
g350	30.65	12.1353	49.1646	4.06173	-2.0221	0.00349204	0.0354087
g35004	8116.25	4351.61	11880.9	2.73029	-1.44906	2.21959e-06	0.000123473
g35016	2618.68	1574.32	3663.05	2.32676	-1.21832	1.65909e-05	0.000614396
g35022	643.82	404.925	882.715	2.18004	-1.12436	0.00211448	0.0246369
g35051	7.39551	1.84042	12.9506	7.03813	-2.81519	0.00364557	0.0365293
g35075	1705.55	2494.1	917.012	0.367674	1.4435	8.13732e-05	0.00212325
g35076	355.763	210.472	501.054	2.38183	-1.25207	0.00138613	0.017945
g35086	48.0011	26.7015	69.3008	2.59602	-1.3763	0.000576728	0.00947076
g35096	1250.38	1702.69	798.079	0.468741	1.09314	0.000906771	0.0131365
g35099	61.517	13.352	109.682	8.22252	-3.03958	0.00243717	0.0273462
g35106	8.16413	0.6052	15.7231	25.7808	-4.68823	0.00448398	0.0424694
g35135	128.132	79.7035	176.561	2.21684	-1.14851	0.00181048	0.0219375
g35139	50.6919	19.8272	81.5565	4.10867	-2.03867	0.00129061	0.0170491
g35183	11.4395	2.15386	20.7251	9.65125	-3.27072	0.000246001	0.00497166
g35190	392.587	231.423	553.752	2.39316	-1.25892	0.000569684	0.00938431
g35202	425.352	588.619	262.086	0.445169	1.16758	0.000419414	0.00746913
g35209	541.403	817.77	265.036	0.32405	1.62571	0.000777071	0.0117288
g35273	74.7235	44.8203	104.627	2.33451	-1.22312	0.000495138	0.00844
g35274	42.4644	21.0671	63.8617	3.02763	-1.59819	0.00253947	0.0281797
g35279	777.575	299.143	1256.01	4.20018	-2.07045	2.29542e-11	7.24994e-09
g35302	1152.09	1736.9	567.284	0.326619	1.61432	4.80896e-06	0.000230885
g35344	20.0089	37.1587	2.85907	0.0769003	3.70087	0.00341253	0.0348547
g35355	6287.57	4069.1	8506.03	2.0905	-1.06385	1.31944e-06	8.05509e-05
g35364	69.2985	37.6843	100.913	2.68075	-1.42264	0.00229727	0.0261371
g3542	24.2945	12.3802	36.2088	2.93368	-1.55271	0.00505276	0.0462961
g35432	995.501	538.689	1452.31	2.69634	-1.431	5.86603e-05	0.0016557
g35477	2238.5	1441.01	3035.98	2.10695	-1.07515	4.74224e-05	0.00139626
g35491	2192.92	969.845	3415.99	3.52249	-1.81659	3.59837e-06	0.000179999
g35510	111.912	42.6839	181.139	4.24825	-2.08687	3.17188e-06	0.000164032
g35511	52.0354	23.6437	80.4271	3.40987	-1.76972	0.00138923	0.0179669
g35519	647.286	227.897	1066.67	4.68177	-2.22705	2.62923e-07	2.07178e-05
g35525	130.423	58.6091	202.237	3.45381	-1.78819	0.000173171	0.00379912
g35582	35.8288	12.4064	59.2511	4.7582	-2.25042	7.17577e-06	0.000314131
g35598	542.564	326.374	758.754	2.32363	-1.21638	4.60739e-09	7.29919e-07
g35618	15.4916	25.6231	5.36014	0.209605	2.25425	0.00160066	0.0200763
g35656	460.357	221.893	698.821	3.15042	-1.65554	4.02746e-05	0.00121578
g35658	56.4477	17.7046	95.1907	5.38944	-2.43014	3.13428e-05	0.00100742
g35711	45.7966	12.97	78.6231	6.08427	-2.60508	6.35571e-09	9.27084e-07
g35757	42.8298	59.1431	26.5165	0.448312	1.15742	0.0017746	0.0215902
g3595	241.521	332.139	150.902	0.454261	1.13841	1.02596e-06	6.53486e-05
g35975	126.714	67.5653	185.862	2.75184	-1.4604	5.42549e-06	0.000253169
g35976	113.658	153.125	74.1911	0.484527	1.04535	0.00139879	0.0180478
g36079	69.6552	26.2704	113.04	4.31638	-2.10982	5.74288e-09	8.60689e-07
g3611	208.581	102.964	314.197	3.05231	-1.6099	0.00186953	0.0224454
g36172	933.338	1258.95	607.726	0.482771	1.05059	0.000872672	0.0127635
g36303	176.258	243.19	109.325	0.449785	1.15269	0.00390701	0.0383644
g36411	32.166	16.7047	47.6273	2.84509	-1.50848	0.00328107	0.0338643
g3664	2621.05	1320.03	3922.07	2.9714	-1.57114	0.000542976	0.00905758
g36681	6.05465	0.288614	11.8207	35.8855	-5.16533	0.000539393	0.00901355
g3669	6661.95	9403.02	3920.88	0.416991	1.26191	3.50543e-05	0.0011017
g36762	3.38168	0	6.76335	40.017	-5.32254	0.00439844	0.0418251
g36781	668.055	909.11	427.001	0.469602	1.09049	0.000220225	0.00458407
g36787	62.3303	7.14107	117.52	16.2596	-4.02322	2.37457e-12	9.45301e-10
g3682	81.2736	42.4138	120.133	2.83828	-1.50502	5.19237e-05	0.00150788
g37012	490.321	269.128	711.514	2.64463	-1.40307	7.4556e-05	0.0019942
g37029	28.218	56.4359	0	0.00350262	8.15735	1.91517e-06	0.000110063
g37030	467.296	929.46	5.13237	0.00551514	7.50239	0.00107315	0.0148866
g37033	199.549	397.275	1.82351	0.00458085	7.77017	0.00310939	0.0325719
g37154	79.4722	39.9236	119.021	2.98373	-1.57712	0.00251306	0.0279635
g37176	98.0403	191.002	5.07845	0.0265576	5.23473	0.00276028	0.0299516
g372	546.405	793.302	299.508	0.377506	1.40543	0.00341114	0.0348547
g37240	60.9358	24.7232	97.1484	3.92558	-1.97291	3.57339e-05	0.00111938
g37246	119.783	68.6285	170.938	2.49112	-1.3168	0.00326838	0.0337771
g37262	2004.75	1286.76	2722.74	2.11586	-1.08124	2.75195e-05	0.000913494
g37294	35.1246	53.153	17.0961	0.322183	1.63405	0.00340405	0.03484
g37296	532.307	846.088	218.526	0.258308	1.95284	1.28197e-05	0.000501976
g37301	45.1708	9.80101	80.5406	8.22176	-3.03945	1.22567e-08	1.59325e-06
g37303	38.2632	5.57091	70.9554	12.813	-3.67954	1.58253e-11	5.1692e-09
g37308	523.677	783.517	263.838	0.33674	1.57029	0.000643736	0.0103022
g37342	225.103	411.222	38.9831	0.0947174	3.40023	2.01264e-08	2.41877e-06
g37348	371.646	558.148	185.144	0.331619	1.5924	9.93427e-05	0.00246852
g37366	1063.28	525.802	1600.76	3.0449	-1.6064	0.00161749	0.0202276
g37370	19.5619	38.7696	0.354172	0.00991798	6.65574	2.63102e-05	0.00088229
g37389	41311.5	17057.9	65565	3.84369	-1.94249	7.62833e-06	0.000331286
g37390	1785.55	479.728	3091.38	6.44438	-2.68804	0.00386252	0.038071
g37393	17644.8	6596.8	28692.8	4.34957	-2.12087	9.00484e-07	5.86265e-05
g37395	76470.5	36310.3	116631	3.21206	-1.6835	3.9218e-06	0.000193643
g37396	57620.2	29762	85478.4	2.87208	-1.5221	2.88049e-06	0.000152049
g37407	400.869	541.774	259.965	0.479903	1.05919	0.00214664	0.0248978
g37512	281.854	156.097	407.612	2.61214	-1.38523	1.82981e-08	2.23418e-06
g37527	269.88	390.806	148.954	0.381343	1.39084	1.98267e-05	0.000702893
g37543	65.5811	94.438	36.7241	0.389126	1.36169	0.000234597	0.00481504
g37574	541.55	306.154	776.947	2.5383	-1.34386	3.7744e-07	2.8285e-05
g37579	574.404	812.739	336.07	0.413468	1.27415	0.00240363	0.0270812
g37594	369.86	175.869	563.852	3.20562	-1.6806	0.000979257	0.0139175
g3760	439.942	196.101	683.783	3.48632	-1.8017	0.000237992	0.00487208
g37603	52.9853	28.2094	77.7613	2.75115	-1.46004	0.00130116	0.0171235
g37615	20.0091	2.38811	37.6301	15.63	-3.96625	0.00136538	0.0177436
g37630	525.689	308.831	742.546	2.40435	-1.26565	1.5882e-05	0.000595159
g37644	287.093	117.656	456.53	3.88196	-1.95679	0.000602401	0.00979241
g37656	478.994	318.568	639.42	2.0074	-1.00533	5.99203e-06	0.000274249
g37733	6.92849	13.857	0	0.0142575	6.13213	0.00441858	0.0419332
g37742	4.328	8.656	0	0.0228548	5.45136	0.00123789	0.0165068
g37761	202.061	124.641	279.481	2.24216	-1.16489	0.00100053	0.014141
g37784	4.0122	8.02441	0	0.0246501	5.34226	0.00184202	0.0222374
g3780	30.5834	13.2882	47.8787	3.61456	-1.85382	0.000372546	0.00679274
g37839	253.373	121.78	384.966	3.16257	-1.6611	3.51635e-05	0.00110423
g37844	186.058	111.922	260.195	2.32469	-1.21704	0.000200126	0.00427513
g37855	41.3002	16.8433	65.757	3.90328	-1.96469	0.000700837	0.0109144
g37874	591.43	264.735	918.126	3.46896	-1.7945	0.000249249	0.00501873
g37875	39.4192	13.4265	65.412	4.89179	-2.29036	0.000223733	0.00464267
g379	1750.28	941.071	2559.48	2.72002	-1.44361	7.7209e-06	0.000333789
g37909	186.631	263.553	109.709	0.416207	1.26463	2.52233e-05	0.000851555
g37985	27.53	13.1284	41.9315	3.20975	-1.68246	0.00504319	0.0462767
g38036	2421.41	980.856	3861.96	3.93757	-1.97731	0.00079647	0.0119181
g38044	14697.9	8754.64	20641.1	2.35773	-1.2374	8.39121e-05	0.0021668
g38045	19.8863	7.75746	32.0152	4.14468	-2.05126	0.00084716	0.0124619
g38089	74.1208	44.232	104.01	2.35271	-1.23432	0.000267465	0.00529896
g38154	672.913	364.968	980.857	2.68789	-1.42647	8.28598e-06	0.000353816
g38165	23.42	6.86995	39.97	5.85355	-2.54931	0.000199013	0.00426328
g38178	1344.96	878.072	1811.84	2.06363	-1.04519	0.00321692	0.03337
g38193	71.954	16.6028	127.305	7.67476	-2.94012	1.34857e-05	0.000518492
g38203	1051.11	1467.06	635.166	0.432909	1.20786	0.00202339	0.0238082
g38211	526.667	219.321	834.013	3.80428	-1.92762	7.20103e-08	7.09283e-06
g38229	1265.05	2087.12	442.992	0.212253	2.23614	3.58166e-11	1.06938e-08
g38236	197.437	307.537	87.336	0.283952	1.81628	0.00545703	0.048886
g38246	834.741	532.815	1136.67	2.13363	-1.09331	1.67672e-05	0.000619121
g38247	182.129	101.452	262.806	2.59191	-1.37401	0.00399262	0.0389629
g38261	5.18589	10.3718	0	0.0190165	5.7166	0.0013892	0.0179669
g38291	8.80996	16.5465	1.07345	0.064913	3.94535	0.0014674	0.0187683
g38296	5239.19	1987.72	8490.67	4.27172	-2.09482	1.09267e-05	0.000440955
g38315	240.463	71.8953	409.031	5.68771	-2.50785	2.184e-12	8.87936e-10
g38317	303.182	188.804	417.561	2.21199	-1.14534	0.00184813	0.0222591
g38360	13183.9	18066.6	8301.17	0.459476	1.12194	2.68352e-06	0.000143035
g38381	1291.08	756.41	1825.75	2.41383	-1.27133	1.01947e-06	6.50438e-05
g38389	1954.9	1259.98	2649.83	2.10306	-1.07249	0.000525068	0.00882821
g38407	87.1908	19.1497	155.232	8.11222	-3.0201	0.000149268	0.00338076
g38417	261.469	170.097	352.842	2.07378	-1.05226	0.00216645	0.0250212
g38426	81.7413	117.544	45.9391	0.390865	1.35526	0.00151735	0.0192462
g38435	136.575	202.187	70.9622	0.350998	1.51046	0.000491535	0.00841999
g38448	48.1054	24.8113	71.3995	2.8695	-1.5208	0.0024129	0.0271697
g38476	98.2923	37.1045	159.48	4.30312	-2.10538	0.00128078	0.0169722
g38508	131.08	75.6594	186.501	2.46518	-1.30169	0.00109254	0.0151046
g38513	381.535	230.649	532.421	2.30852	-1.20697	0.00129211	0.01706
g38521	22.8414	40.3009	5.38201	0.133542	2.90463	0.00153036	0.0193597
g38525	87.1201	35.3285	138.912	3.92135	-1.97135	0.00215191	0.0249286
g38536	472.859	272.407	673.312	2.47181	-1.30556	0.000723965	0.0111834
g38575	1149.7	450.55	1848.85	4.10414	-2.03708	0.000147064	0.00334147
g38579	1026.77	472.258	1581.27	3.34868	-1.74359	2.27849e-05	0.000788027
g38580	245.787	338.331	153.243	0.452694	1.14339	0.00067058	0.0106025
g38592	49.7559	7.17219	92.3396	12.7766	-3.67543	2.39619e-07	1.92385e-05
g3861	17.1	1.57663	32.6235	20.9882	-4.39151	5.88638e-05	0.00166022
g38619	4.14942	8.29885	0	0.0238236	5.39147	0.00309787	0.0325251
g38646	1022.02	602.858	1441.18	2.39061	-1.25738	7.25604e-06	0.000316557
g38647	40.8669	8.17789	73.5559	8.95659	-3.16295	8.58075e-09	1.17931e-06
g38648	146.078	45.8925	246.263	5.35422	-2.42068	2.60184e-05	0.000875303
g38649	18.9087	0	37.8174	223.704	-7.80545	4.46251e-09	7.13572e-07
g38654	36.8147	70.42	3.20942	0.0456221	4.45412	0.000720351	0.0111456
g38660	666.197	362.973	969.42	2.67204	-1.41794	6.36046e-07	4.40358e-05
g38662	242.334	106.982	377.685	3.53182	-1.82041	9.90822e-05	0.00246686
g38684	157.918	62.6993	253.137	4.04003	-2.01437	0.00309245	0.0325116
g38689	1854.16	846.643	2861.68	3.38021	-1.75711	0.00113556	0.0155492
g38692	50.544	79.4857	21.6023	0.271265	1.88223	1.42801e-05	0.000544653
g38693	1255.97	561.757	1950.18	3.47257	-1.796	3.08332e-09	5.2605e-07
g38704	155.565	49.8434	261.287	5.24873	-2.39197	1.32646e-05	0.000512541
g38710	762.264	263.48	1261.05	4.78693	-2.2591	1.09421e-05	0.00044111
g38729	517.177	773.46	260.895	0.337278	1.56799	0.00082222	0.0121888
g38746	402.003	536.862	267.145	0.497742	1.00653	3.3653e-07	2.57223e-05
g38759	167.716	52.4984	282.934	5.39465	-2.43153	1.29359e-05	0.000503944
g38773	46.0737	68.4547	23.6928	0.345527	1.53313	0.000900449	0.0130647
g3882	2609.11	4178.11	1040.12	0.248944	2.0061	8.1522e-05	0.00212335
g38844	270.256	157.395	383.117	2.43559	-1.28427	1.67881e-05	0.000619279
g38866	23.5013	8.20429	38.7984	4.71328	-2.23673	0.00012548	0.00295469
g3887	361.384	174.263	548.504	3.14816	-1.65451	4.88302e-06	0.000233853
g38874	7.8964	0.921786	14.871	16.1473	-4.01322	0.00363709	0.0365017
g3889	882.028	456.191	1307.87	2.86761	-1.51985	7.89751e-07	5.33466e-05
g38955	1221.32	2091.4	351.236	0.16793	2.57407	2.19587e-06	0.00012251
g38962	423.654	711.02	136.288	0.191601	2.38382	1.09248e-07	1.00849e-05
g38979	166.3	242.312	90.2879	0.372513	1.42464	0.00284069	0.0305583
g38984	38.2607	67.246	9.27536	0.138111	2.8561	8.48621e-09	1.17931e-06
g39003	499.394	670.548	328.24	0.489506	1.0306	0.000283515	0.00552922
g39004	3752.01	2430.3	5073.73	2.08768	-1.0619	2.91839e-05	0.000953266
g39022	3145.38	2003.09	4287.67	2.14054	-1.09797	0.000241113	0.00491445
g39031	6.90865	0	13.8173	81.7443	-6.35305	0.000935964	0.0134382
g39047	47.512	9.58409	85.44	8.92879	-3.15847	4.66949e-05	0.0013802
g3906	145.737	214.651	76.8231	0.357831	1.48265	0.00239031	0.026955
g39081	81.484	115.802	47.166	0.407672	1.29452	0.000708052	0.0109954
g39101	47.2672	7.68142	86.8529	11.3111	-3.49966	5.64795e-06	0.000261634
g39123	430.624	244.431	616.817	2.52444	-1.33596	0.000144986	0.00330568
g39165	2498.98	1479.36	3518.6	2.37844	-1.25002	4.14248e-07	3.04448e-05
g39207	257.669	109.913	405.425	3.69075	-1.88391	0.00408217	0.0396262
g39219	43.3006	14.0147	72.5865	5.1876	-2.37507	0.00509766	0.0465835
g3922	27.1154	44.6615	9.56925	0.214648	2.21996	0.00308473	0.0324853
g39235	39.5958	4.36838	74.8232	17.2319	-4.10701	7.99052e-07	5.37629e-05
g39240	18.4758	4.34671	32.6049	7.53122	-2.91288	0.00414566	0.040041
g3926	2156.72	1262.08	3051.36	2.41793	-1.27377	2.37441e-06	0.000129818
g3927	214.437	120.084	308.79	2.5729	-1.3634	0.000665869	0.0105504
g3930	131.613	23.2927	239.934	10.2999	-3.36456	8.07446e-05	0.00211213
g39300	1542.34	2200.92	883.763	0.401521	1.31645	0.000266663	0.0052929
g3931	222.823	80.4212	365.226	4.54236	-2.18344	2.28584e-05	0.000789854
g39324	838.169	492.519	1183.82	2.40386	-1.26535	7.01112e-05	0.00191115
g39333	378.68	161.042	596.318	3.70343	-1.88886	0.00229299	0.026109
g39368	1475.79	2012.21	939.363	0.466785	1.09917	0.00507667	0.0464818
g39403	287.595	407.336	167.854	0.411947	1.27947	9.1168e-05	0.00230797
g39404	778.436	406.402	1150.47	2.83094	-1.50128	8.02384e-05	0.00210609
g39416	4.65577	0.316586	8.99495	27.2904	-4.77032	0.00267209	0.0292103
g39457	27.5443	0.921786	54.1668	58.9599	-5.88166	3.73098e-09	6.14426e-07
g39466	397.825	606.048	189.601	0.312764	1.67685	0.00047053	0.00814413
g39497	118.882	58.732	179.032	3.04658	-1.60719	1.94396e-07	1.60373e-05
g39600	15.4959	28.8545	2.13724	0.0742628	3.75122	0.000615852	0.00996022
g39606	2178.99	3250.56	1107.43	0.340705	1.5534	1.22535e-16	1.56097e-13
g39607	979.091	1554.65	403.533	0.259568	1.94581	1.13686e-18	2.17238e-15
g39610	1083.48	1611.8	555.156	0.344427	1.53773	8.67135e-12	3.01266e-09
g39613	419	595.093	242.906	0.408297	1.29231	1.44966e-08	1.82844e-06
g39617	4974.61	8184.55	1764.67	0.215619	2.21345	3.34764e-09	5.61127e-07
g39619	123.694	232.551	14.8371	0.0638492	3.96919	0.00450985	0.0426083
g39625	352.17	75.5144	628.825	8.33621	-3.05939	2.02291e-07	1.66163e-05
g39666	188.507	283.535	93.4791	0.329611	1.60116	9.6568e-10	1.93222e-07
g39696	574.349	884.723	263.975	0.298311	1.74511	2.82715e-15	2.1609e-12
g39697	309.717	452.764	166.67	0.368207	1.44141	2.85893e-09	4.94388e-07
g39699	305.049	445.283	164.815	0.370267	1.43336	3.27679e-12	1.23989e-09
g39702	5140.2	8912.41	1367.98	0.153499	2.7037	5.73529e-09	8.60689e-07
g39753	79.126	20.7369	137.515	6.63848	-2.73085	3.2662e-05	0.00104281
g3977	887.661	540.763	1234.56	2.28267	-1.19072	0.000353233	0.00653728
g39853	72.7214	103.208	42.2351	0.409107	1.28945	0.00341846	0.0348796
g3988	1666.4	1105.31	2227.49	2.01526	-1.01097	3.43913e-06	0.000175244
g39912	2011.87	2990.08	1033.66	0.345692	1.53244	8.52552e-07	5.63702e-05
g39919	39.4454	68.2873	10.6035	0.155653	2.6836	0.0015264	0.01932
g39927	13.3947	2.49999	24.2894	9.83348	-3.2977	5.00194e-05	0.00146146
g39939	53.066	94.4582	11.6737	0.123777	3.01419	0.00121562	0.0163237
g39977	58.8856	12.3975	105.374	8.52722	-3.09207	1.69753e-07	1.43653e-05
g39980	132.352	69.2015	195.503	2.82741	-1.49948	0.00276626	0.0299924
g39987	20.9817	9.77934	32.184	3.2894	-1.71783	0.000799071	0.0119429
g39990	171.055	228.491	113.62	0.496875	1.00905	0.000353838	0.00654532
g4001	109.848	219.329	0.367652	0.00175539	9.154	0.00405922	0.0394869
g40028	78.8769	119.273	38.4809	0.32222	1.63388	0.00460863	0.0432983
g4018	35.7192	58.5307	12.9076	0.220159	2.18338	6.01272e-05	0.00169086
g40205	15.7169	3.34259	28.0912	8.38786	-3.0683	0.00237746	0.0268656
g40267	61.8875	23.1414	100.634	4.34473	-2.11927	1.96612e-05	0.000697671
g40269	16.0483	6.36229	25.7344	4.02837	-2.0102	0.00144938	0.0185626
g40484	46.6405	65.8348	27.4462	0.417712	1.25942	0.0022547	0.0257382
g40485	21.631	34.6187	8.64332	0.249093	2.00524	0.000579995	0.00950908
g40505	70.7963	39.8858	101.707	2.55375	-1.35262	0.000622568	0.0100476
g40655	13.7464	24.3104	3.18246	0.131646	2.92527	0.0052004	0.0472412
g40699	50.1191	24.5529	75.6853	3.0901	-1.62765	0.00204742	0.0240166
g40728	247.747	398.258	97.2355	0.24404	2.03481	5.12561e-06	0.000243255
g40798	72.3815	143.674	1.08948	0.00756123	7.04716	0.00414727	0.040041
g40817	118.172	52.8255	183.518	3.47559	-1.79726	0.00183687	0.0221941
g40874	974.1	464.892	1483.31	3.19096	-1.67399	0.000111959	0.00271321
g40883	25.5975	42.5882	8.6067	0.201949	2.30794	0.00306663	0.0323392
g40891	6790.83	4484.89	9096.78	2.02835	-1.02031	1.28505e-08	1.65915e-06
g40897	3903.38	1467.59	6339.18	4.31959	-2.11089	1.88958e-05	0.000678703
g40904	8.33879	1.58135	15.0962	9.6892	-3.27638	0.00475096	0.0442956
g40913	68.2311	6.9147	129.547	18.6784	-4.2233	5.64218e-05	0.00161277
g4092	215.684	60.108	371.259	6.18145	-2.62794	0.000134273	0.00311568
g40941	7.78999	1.55338	14.0266	9.10054	-3.18595	0.00180374	0.0218836
g40968	638.999	944.062	333.936	0.353686	1.49946	0.000182649	0.00396833
g4098	1798.02	44.237	3551.8	80.1571	-6.32476	8.38132e-33	6.40618e-29
g40994	703.698	206.682	1200.71	5.81139	-2.53888	1.31062e-06	8.01777e-05
g41028	454.006	670.46	237.552	0.354318	1.49688	6.91138e-05	0.00189071
g41071	8.35268	0.630022	16.0753	26.0672	-4.70416	0.000394374	0.0070926
g412	46.8452	75.5149	18.1754	0.240868	2.05368	0.000562782	0.00929845
g41246	48.6473	9.78982	87.5049	8.87943	-3.15047	3.2183e-05	0.00102924
g41293	4240.49	1877.53	6603.45	3.51734	-1.81449	2.35754e-08	2.73854e-06
g41356	32.7975	11.6075	53.9875	4.64824	-2.21669	0.00487244	0.0450654
g41366	281.968	84.1381	479.798	5.70743	-2.51284	2.62704e-05	0.000882229
g41368	373.256	121.3	625.211	5.15697	-2.36652	0.000163197	0.00362188
g41581	74.3203	6.50215	142.139	21.8978	-4.45271	9.43909e-06	0.000392427
g41590	1025	1583.64	466.359	0.294464	1.76384	0.000768084	0.0116479
g41594	38.1395	13.811	62.4679	4.52284	-2.17723	0.000493856	0.00843706
g41628	284.852	161.265	408.439	2.53345	-1.3411	2.31808e-06	0.000127651
g41656	472.673	268.172	677.175	2.52554	-1.33659	0.000713455	0.0110613
g41677	15.1419	27.7961	2.4876	0.0896645	3.47932	0.0021168	0.0246414
g41697	1148.98	1916.85	381.111	0.198813	2.33052	9.77221e-05	0.00243935
g41700	289.388	511.546	67.2296	0.131405	2.9279	1.71237e-05	0.00062985
g4172	1750.1	2341.74	1158.45	0.494712	1.01534	5.23993e-05	0.00151938
g41734	166.867	96.6668	237.067	2.45334	-1.29475	0.000332077	0.00623329
g4174	2168.07	3279.3	1056.83	0.322258	1.63371	0.00114887	0.0156529
g41765	5091.88	2579.08	7604.68	2.94842	-1.55994	3.37331e-05	0.00106897
g41773	3.43496	0	6.86991	40.5869	-5.34294	0.00529927	0.0478618
g41781	356.254	123.029	589.478	4.79409	-2.26126	1.3942e-05	0.000533888
g4179	746.732	1066.99	426.479	0.399742	1.32286	1.40221e-07	1.24047e-05
g41802	56.8497	23.9802	89.7191	3.74239	-1.90396	0.00159705	0.0200376
g41813	1581.51	190.968	2972.05	15.56	-3.95977	2.44727e-11	7.60385e-09
g41824	362.044	520.819	203.27	0.390154	1.35788	0.0026503	0.0290302
g4184	266.356	402.374	130.338	0.323865	1.62654	0.00175901	0.0214431
g41848	5.33827	0	10.6765	63.1557	-5.98084	0.00177073	0.0215584
g41866	1068.79	1451.52	686.065	0.472662	1.08112	0.0019622	0.0232597
g41881	1629.99	836.568	2423.42	2.89691	-1.53452	3.58939e-09	5.98684e-07
g41891	61.0127	19.9622	102.063	5.10309	-2.35137	0.000369023	0.0067514
g41894	3472	1932.61	5011.39	2.59317	-1.37471	0.000760788	0.0115653
g41900	15.7415	0.315011	31.168	94.6218	-6.5641	1.20337e-05	0.000478555
g41901	824.493	1110.54	538.451	0.484882	1.04429	0.000783967	0.0117956
g4191	60.4859	81.1826	39.7892	0.489505	1.0306	0.00298785	0.0317803
g41913	314.341	195.761	432.921	2.21179	-1.14521	7.89773e-05	0.00208014
g41914	1149.25	760.753	1537.75	2.02165	-1.01553	0.000782753	0.0117847
g41919	192.457	109.18	275.735	2.52482	-1.33618	0.000524095	0.0088235
g41923	320.016	197.482	442.551	2.24184	-1.16468	2.26208e-05	0.00078306
g41925	134.491	214.013	54.9689	0.25667	1.96201	0.000523491	0.00881813
g41935	1544.17	2070.79	1017.56	0.491389	1.02506	0.000187709	0.00405751
g41953	90.2544	40.3472	140.162	3.47669	-1.79772	0.000243285	0.00493243
g41969	256.012	146.902	365.122	2.48637	-1.31404	0.000508021	0.00860978
g41970	1242.14	806.496	1677.79	2.08045	-1.0569	0.00184866	0.0222591
g41971	29.4258	8.8607	49.991	5.63391	-2.49414	0.000250718	0.00504035
g41974	766.925	295.214	1238.64	4.19683	-2.0693	1.12934e-06	7.13718e-05
g41983	97.7699	60.1515	135.388	2.2547	-1.17294	0.00352985	0.0356973
g42022	90.2397	37.479	143	3.81571	-1.93195	2.97683e-05	0.000967395
g42039	515.763	250.169	781.357	3.12347	-1.64315	0.000277782	0.0054441
g42062	98.8215	134.792	62.8511	0.466754	1.09927	0.000247296	0.00498993
g42068	790.589	333.39	1247.79	3.74271	-1.90408	1.82893e-10	4.452e-08
g42071	601.987	325.808	878.165	2.69555	-1.43058	0.00522066	0.0473128
g42078	840.381	392.57	1288.19	3.28254	-1.71481	2.58169e-10	6.02463e-08
g42084	9403.24	4714.04	14092.4	2.98953	-1.57992	3.79113e-07	2.8285e-05
g42088	275.27	397.637	152.904	0.384488	1.37899	2.8247e-05	0.000928359
g42098	220.664	322.741	118.588	0.36756	1.44395	7.95967e-08	7.66233e-06
g42131	815.199	358.192	1272.21	3.5523	-1.82875	0.00249044	0.0277646
g42137	401.72	183.963	619.477	3.36836	-1.75204	9.44528e-13	4.05585e-10
g42140	135.009	34.6579	235.361	6.80082	-2.76571	2.17412e-09	3.97552e-07
g42144	84.0499	34.5834	133.516	3.8659	-1.9508	1.57898e-06	9.37018e-05
g4215	209.827	287.699	131.954	0.458362	1.12544	0.000374965	0.00682057
g42174	14.5001	29.0002	0	0.00681168	7.19777	5.19178e-05	0.00150788
g42176	1429.75	2827.6	31.8997	0.0112776	6.4704	0.000150887	0.00340002
g42209	287.96	58.8694	517.051	8.78288	-3.13469	0.00466449	0.0436838
g42228	1337.79	677.985	1997.59	2.94647	-1.55899	0.000121792	0.0028893
g42323	282.618	417.682	147.555	0.353215	1.50138	0.00283602	0.0305393
g42332	1189.62	573.143	1806.09	3.15144	-1.65601	6.43429e-05	0.00178446
g42333	15274.4	20692.2	9856.69	0.47635	1.06991	0.000108693	0.0026475
g42337	439.933	194.052	685.815	3.53452	-1.82152	8.15626e-05	0.00212335
g4235	22.156	36.4385	7.87342	0.215932	2.21135	0.000357453	0.00659941
g42360	1198.75	562.348	1835.15	3.264	-1.70664	9.41168e-11	2.51529e-08
g42362	583.152	916.102	250.201	0.273058	1.87272	0.000524759	0.0088269
g42368	25.1435	39.8496	10.4373	0.261126	1.93718	0.00026366	0.00525716
g42369	16207	23309	9104.95	0.390618	1.35617	4.44078e-07	3.20819e-05
g42375	20.2441	2.52954	37.9586	15.2718	-3.9328	2.06401e-06	0.000116687
g42445	136.288	46.8191	225.757	4.81926	-2.26881	0.00133434	0.0174638
g42448	61.5322	102.014	21.0503	0.206371	2.27669	0.00506504	0.0463975
g42468	3451.15	2159.43	4742.87	2.19634	-1.1351	0.0029695	0.0316403
g42478	1359.16	1932.79	785.528	0.406402	1.29902	3.34548e-05	0.00106191
g42491	298.09	73.5297	522.651	7.11152	-2.83016	1.93727e-08	2.34293e-06
g42497	240.931	389.425	92.4372	0.237534	2.0738	1.75935e-05	0.000641575
g42499	85.8054	119.462	52.1486	0.436808	1.19493	0.00325483	0.0336643
g42512	2142.26	1258.92	3025.6	2.40351	-1.26514	0.00170932	0.0209846
g42540	1043.33	545.987	1540.68	2.82151	-1.49647	1.65381e-08	2.02576e-06
g42541	1551.4	995.505	2107.29	2.11699	-1.08201	0.00374153	0.0371983
g42588	49.9537	5.61463	94.2928	16.8529	-4.07493	4.91795e-05	0.00144243
g42589	7.56967	0.6052	14.5341	23.8042	-4.57314	0.00210162	0.0245169
g4259	43.0734	3.026	83.1207	27.3283	-4.77232	1.41651e-07	1.25023e-05
g42590	58.3131	10.4651	106.161	10.1126	-3.33808	0.000474688	0.00818759
g42592	59.419	8.40796	110.43	13.1626	-3.71837	0.000211887	0.00447387
g42611	134.783	206.129	63.4362	0.307733	1.70025	2.6147e-10	6.05613e-08
g42645	2250.11	1211.35	3288.87	2.71515	-1.44103	5.87275e-09	8.6656e-07
g42657	6641.16	3725.98	9556.34	2.5648	-1.35885	8.60033e-09	1.17931e-06
g42677	173.07	56.597	289.544	5.11419	-2.3545	5.77646e-09	8.6234e-07
g42678	389.277	206.425	572.13	2.77178	-1.47081	8.30399e-06	0.000354189
g42688	794.611	450.029	1139.19	2.53218	-1.34038	8.76715e-11	2.39324e-08
g4269	46.8144	66.6356	26.9932	0.404625	1.30534	0.00136647	0.0177446
g42691	36.7973	55.4443	18.1503	0.328077	1.60789	0.00255443	0.0282965
g42721	1712.68	560.253	2865.1	5.11468	-2.35465	8.46114e-06	0.000357699
g42732	9.5722	2.49999	16.6444	6.70762	-2.7458	0.0053352	0.0480546
g42735	157.32	69.1255	245.514	3.55474	-1.82974	6.93614e-06	0.000306804
g42760	584.809	826.549	343.069	0.415117	1.26841	0.00240718	0.0271132
g42765	742.12	994.555	489.686	0.492471	1.02189	1.29532e-05	0.000504045
g42790	3334.93	5951.25	718.603	0.120753	3.04987	1.7218e-15	1.43048e-12
g42794	769.959	353.336	1186.58	3.35917	-1.74811	8.69175e-09	1.18211e-06
g42800	59.864	87.8071	31.9209	0.363485	1.46003	0.0002294	0.00473378
g42827	1895.17	1048.14	2742.2	2.61637	-1.38757	7.80873e-05	0.0020638
g42855	21.1672	4.11404	38.2203	9.3561	-3.22591	0.00363924	0.0365101
g42865	23.6427	9.26278	38.0227	4.11597	-2.04123	0.0004699	0.00814059
g42876	54647.8	33435.6	75860	2.26884	-1.18196	7.60782e-09	1.06893e-06
g42891	68.221	10.9992	125.443	11.3982	-3.51074	7.46823e-05	0.0019959
g42946	1834.13	1116.02	2552.23	2.28706	-1.19349	0.00455128	0.0428733
g42956	507.086	320.826	693.345	2.16194	-1.11233	0.00116767	0.0158469
g43	52.9471	24.9712	80.923	3.23489	-1.69372	9.99025e-05	0.00247759
g43006	523.589	187.191	859.986	4.59473	-2.19998	1.76772e-05	0.000643398
g43021	1114.68	602.599	1626.77	2.69949	-1.43269	3.53813e-08	3.87045e-06
g43044	9.17738	1.20725	17.1475	14.0767	-3.81523	0.000327301	0.00617091
g43069	94.58	61.0551	128.105	2.09797	-1.069	0.00503341	0.0462519
g43072	138.46	203.339	73.5818	0.362112	1.46549	6.20249e-08	6.22153e-06
g43096	78.6252	17.219	140.031	8.1333	-3.02384	0.00128853	0.0170394
g43097	381.851	160.636	603.065	3.75532	-1.90894	4.79281e-24	1.83167e-20
g43154	98.2795	32.9993	163.56	4.96047	-2.31048	3.48107e-06	0.000176207
g43182	261.843	367.643	156.044	0.424376	1.23658	0.000781816	0.0117807
g43189	275.996	24.4461	527.545	21.5894	-4.43225	6.95865e-05	0.00189821
g4319	8.51819	16.3306	0.7058	0.0436001	4.51952	0.00248149	0.027685
g432	1835.09	1197.52	2472.66	2.06499	-1.04613	0.00423527	0.0406375
g43204	569.41	360.699	778.121	2.15762	-1.10944	0.000231865	0.0047692
g43206	313.881	101.075	526.688	5.21315	-2.38216	4.36776e-07	3.16741e-05
g43228	271.926	149.145	394.707	2.64844	-1.40514	0.00024108	0.00491445
g43231	8.48032	0.288614	16.672	50.655	-5.66263	0.000285439	0.00555712
g43232	7.25099	0	14.502	85.7861	-6.42267	0.00259694	0.028618
g43233	11.512	0	23.024	136.205	-7.08964	3.69561e-05	0.00114083
g43234	38.2162	0.949757	75.4827	81.1448	-6.34243	2.71264e-07	2.1157e-05
g43246	453.392	256.984	649.8	2.52906	-1.3386	9.61463e-07	6.2068e-05
g43251	120.134	79.1076	161.161	2.03946	-1.02819	0.000140516	0.00321836
g43255	1247.05	1736.07	758.035	0.436596	1.19563	0.00225256	0.0257382
g43262	192.774	118.471	267.077	2.25324	-1.172	0.00417318	0.0402112
g43294	31.5306	15.0742	47.9871	3.18756	-1.67245	0.00143019	0.0183661
g43348	88.653	32.9323	144.374	4.38924	-2.13397	5.57681e-10	1.17751e-07
g43356	82.5547	29.6526	135.457	4.57697	-2.19439	0.00027155	0.00535767
g43379	135.389	202.19	68.5891	0.339178	1.55989	4.67423e-05	0.00138049
g43383	162.835	42.6362	283.033	6.64046	-2.73128	0.000189189	0.00408258
g4340	566.926	328.649	805.204	2.45105	-1.2934	5.34501e-05	0.00154568
g43434	99.9794	40.7034	159.255	3.91348	-1.96845	0.00093298	0.0134094
g43455	39.3578	4.57466	74.141	16.177	-4.01587	1.3399e-06	8.16697e-05
g43488	1022.02	549.648	1494.4	2.71899	-1.44307	4.52668e-08	4.73962e-06
g43533	183.53	95.8122	271.249	2.83377	-1.50272	2.58044e-05	0.000869635
g43537	7.14832	13.2084	1.0882	0.0816131	3.61506	0.0053035	0.0478706
g43547	255.01	37.1129	472.907	12.7499	-3.67241	0.0021282	0.0247347
g43551	97.3945	5.04158	189.747	36.9376	-5.20702	3.59347e-21	9.15544e-18
g43554	27.5284	13.7472	41.3097	3.00178	-1.58582	0.00347022	0.0352623
g43555	337.661	156.629	518.693	3.31428	-1.7287	3.8944e-08	4.16897e-06
g43557	16.2799	0.288614	32.2712	97.9574	-6.61408	5.02321e-07	3.58826e-05
g43560	27.4825	8.97889	45.9861	5.13557	-2.36052	0.000559711	0.00927142
g43564	33.7652	17.9078	49.6226	2.77848	-1.47429	0.00252214	0.02802
g43569	88.8449	27.1831	150.507	5.54758	-2.47186	2.22666e-09	4.01089e-07
g43574	10.7515	0.316586	21.1865	64.2671	-6.00601	0.000582863	0.00953974
g43591	13.6752	1.18243	26.168	21.7262	-4.44136	0.000434394	0.00765386
g43595	45.9927	19.0084	72.9771	3.84977	-1.94477	0.00124219	0.0165468
g43601	139.756	56.0247	223.487	3.99252	-1.9973	2.7712e-10	6.37995e-08
g43614	33.5457	2.65032	64.4411	23.7783	-4.57157	4.58476e-09	7.29919e-07
g43618	14.5272	0.603625	28.4509	46.5787	-5.5416	1.36321e-05	0.000523595
g43622	383.602	180.218	586.985	3.25928	-1.70455	8.35197e-06	0.000354653
g43652	53.606	22.9389	84.2731	3.67862	-1.87916	0.00128824	0.0170394
g43685	676.831	357.078	996.583	2.79189	-1.48124	1.30346e-05	0.000505892
g43689	103.686	56.1888	151.183	2.69015	-1.42769	0.00296578	0.0316248
g43721	17.2519	5.54924	28.9546	5.22369	-2.38507	0.00263166	0.028898
g43726	466.56	642.674	290.445	0.452029	1.14551	1.8228e-10	4.452e-08
g4373	1121	732.569	1509.43	2.06044	-1.04296	2.55676e-07	2.03143e-05
g43743	246.77	386.682	106.859	0.276284	1.85577	0.00020858	0.00441623
g4376	311.586	109.105	514.067	4.71679	-2.23781	3.31387e-10	7.39197e-08
g43766	114.446	199.342	29.5496	0.148265	2.75375	0.00011314	0.00273316
g43774	3057.38	1964.19	4150.58	2.11332	-1.07951	9.32841e-05	0.00234542
g43892	30.8349	10.9186	50.7512	4.67549	-2.22512	0.000118067	0.00282292
g43895	1486.88	596.119	2377.64	3.98924	-1.99612	1.63208e-06	9.59586e-05
g43966	1978.68	1318.9	2638.45	2.00042	-1.0003	5.83899e-07	4.0795e-05
g4401	192.439	286.784	98.0935	0.341931	1.54822	2.1374e-05	0.000747345
g4405	2071.08	2816.56	1325.61	0.470621	1.08736	9.96943e-05	0.00247404
g44063	8.7717	0	17.5434	103.74	-6.69682	4.29999e-06	0.000209608
g44097	52.2953	73.9197	30.6709	0.415404	1.26741	0.0036857	0.0368136
g44166	58.4614	24.9132	92.0095	3.70114	-1.88797	0.0021659	0.0250212
g4417	18.1512	28.4706	7.83171	0.275791	1.85835	0.00214858	0.0249097
g44202	131.057	49.0592	213.054	4.34554	-2.11954	0.000117639	0.00281692
g44293	949.234	614.816	1283.65	2.08815	-1.06223	0.000169182	0.00372443
g44400	771.783	401.432	1142.13	2.84517	-1.50851	1.89961e-05	0.000681666
g4442	3051.9	1737.96	4365.84	2.51217	-1.32894	9.28681e-06	0.000387884
g44558	1125.06	656.997	1593.13	2.42518	-1.27809	0.00078045	0.0117659
g4458	9.69577	19.3915	0	0.0101812	6.61795	0.00198558	0.0234641
g44764	60.3581	88.2717	32.4446	0.368047	1.44204	0.000200675	0.00428447
g4479	19.5689	1.20883	37.929	31.1355	-4.96049	3.71308e-05	0.00114438
g44825	1327.77	1971.38	684.155	0.347052	1.52678	3.7195e-11	1.10192e-08
g44831	75.1336	117.905	32.3623	0.274197	1.86672	0.000221475	0.00460394
g44834	60.0353	94.999	25.0716	0.263918	1.92184	0.00370818	0.0369628
g44850	51.6295	14.1123	89.1467	6.31665	-2.65916	0.00160189	0.0200852
g4486	47.0616	30.103	64.0202	2.12328	-1.0863	0.0046095	0.0432983
g4487	310.286	101.301	519.27	5.1294	-2.35879	9.55386e-07	6.178e-05
g4492	166.991	54.1361	279.845	5.17234	-2.37082	0.00476895	0.0443983
g4493	132.072	54.7619	209.383	3.82377	-1.935	0.000930197	0.0133859
g44940	8649.17	5307.32	11991	2.25938	-1.17592	3.87146e-05	0.00118289
g44968	8672.07	4905.99	12438.2	2.53535	-1.34219	0.000133695	0.00310414
g4497	69.6555	107.575	31.7362	0.295159	1.76043	3.5005e-05	0.00110106
g4516	39.7587	65.1257	14.3917	0.220437	2.18156	9.27333e-05	0.00233464
g4517	12.8091	22.3632	3.25495	0.14512	2.78468	0.00360661	0.0362434
g45360	8.44193	2.15858	14.7253	6.84361	-2.77476	0.00341152	0.0348547
g45395	40.0284	60.7741	19.2827	0.317674	1.65438	0.000307061	0.00586377
g45461	15.9036	5.49172	26.3156	4.78994	-2.26001	0.00357659	0.0360365
g45462	8.8143	0	17.6286	104.199	-6.7032	1.14723e-05	0.000458053
g45602	2461.86	1123.23	3800.49	3.38372	-1.75861	1.19299e-05	0.000475417
g45614	260.758	385.571	135.945	0.352467	1.50444	0.00169212	0.0208606
g4562	59.8758	16.5717	103.18	6.22603	-2.63831	8.83858e-06	0.000371191
g4563	66.5604	19.7444	113.376	5.75149	-2.52394	0.0050008	0.046052
g45672	3052.69	4465.99	1639.39	0.367079	1.44584	4.65312e-09	7.30819e-07
g4572	12.8449	1.75966	23.9301	13.3407	-3.73776	0.00119846	0.0161644
g45840	85.0383	22.2054	147.871	6.67949	-2.73974	8.26044e-06	0.000353515
g4587	1416.09	886.716	1945.46	2.19447	-1.13387	2.02173e-06	0.000115111
g45888	272.4	471.082	73.7181	0.156499	2.67577	5.20256e-06	0.000245691
g45937	75.8913	111.703	40.0798	0.358551	1.47975	1.53784e-05	0.000581322
g45966	285.322	95.9323	474.712	4.95106	-2.30774	2.56292e-06	0.000137953
g45976	19.7298	6.87152	32.588	4.76789	-2.25335	0.00384436	0.037954
g45982	321.412	480.196	162.627	0.338601	1.56234	0.000431854	0.00762317
g45998	304.814	409.048	200.581	0.490571	1.02747	0.00187303	0.0224454
g46001	221.711	306.934	136.489	0.44487	1.16855	0.000294279	0.0056829
g46026	11.6594	1.78448	21.5344	11.914	-3.57459	0.00167132	0.0206715
g46047	24.6129	6.6836	42.5422	6.35181	-2.66717	0.000426138	0.00754667
g46055	212.811	65.7986	359.822	5.46532	-2.45031	3.23095e-07	2.48445e-05
g46058	53.1491	14.8316	91.4667	6.15582	-2.62195	0.000270056	0.00533311
g46060	4729.71	1971.48	7487.94	3.79799	-1.92524	6.00719e-05	0.00169055
g46073	47.6335	10.4511	84.8159	8.12514	-3.02239	3.59537e-06	0.000179999
g46076	22.9136	9.83371	35.9934	3.66756	-1.87482	0.000947485	0.0135489
g46087	785.025	188.075	1381.97	7.34269	-2.87631	2.91302e-15	2.18288e-12
g46093	197.266	65.2418	329.291	5.04468	-2.33476	2.12597e-06	0.000119161
g46095	669.028	193.222	1144.83	5.92115	-2.56588	5.81492e-14	3.26807e-11
g46097	219.279	145.57	292.987	2.01333	-1.00959	0.00023306	0.0047912
g46098	128.742	50.1881	207.296	4.12783	-2.04538	0.000883172	0.012865
g46102	5787.52	2672.53	8902.5	3.33104	-1.73597	0.000173749	0.00380669
g46105	168.934	89.6216	248.246	2.76763	-1.46865	6.39544e-06	0.000289934
g46108	64.3165	11.5486	117.084	10.1928	-3.34948	3.12539e-09	5.30857e-07
g46111	49.5236	11.9486	87.0985	7.29162	-2.86624	3.57552e-06	0.000179561
g46120	6.99372	0	13.9874	82.6954	-6.36973	2.15676e-05	0.000752052
g46142	107.116	53.952	160.28	2.97306	-1.57195	0.000718604	0.0111231
g46151	54.9137	1.52699	108.3	70.7799	-6.14527	4.80709e-14	2.78352e-11
g46156	130.865	1.2368	260.492	212.534	-7.73155	2.05804e-23	7.1502e-20
g4616	1087.9	693.474	1482.33	2.1378	-1.09613	0.000690866	0.0107987
g46160	15.8119	3.10677	28.517	9.23072	-3.20644	0.00021591	0.004531
g46208	31.4508	8.19223	54.7093	6.71266	-2.74689	0.00148149	0.0189168
g46210	7.96822	1.58135	14.3551	9.22559	-3.20564	0.00383275	0.0378764
g46227	7663.87	4629.57	10698.2	2.31087	-1.20844	6.8228e-07	4.66516e-05
g46262	751.906	299.79	1204.02	4.01696	-2.00611	2.98595e-11	9.05667e-09
g46264	102.293	6.67572	197.91	29.4599	-4.88068	2.60783e-30	1.66106e-26
g46285	24.3385	0.315011	48.3621	146.818	-7.19789	2.72285e-08	3.06056e-06
g4630	2923.15	1888.35	3957.96	2.09598	-1.06762	9.15483e-07	5.95017e-05
g46302	893.894	1227.6	560.191	0.45628	1.13201	0.00325378	0.0336626
g46338	102.936	194.632	11.24	0.0575818	4.11824	7.51746e-08	7.32894e-06
g46369	9.44777	0.631597	18.2639	29.6298	-4.88898	0.000115748	0.0027856
g46411	59.8654	114.992	4.73903	0.0410101	4.60788	1.24728e-05	0.000491924
g46416	90.151	0.893815	179.408	195.735	-7.61276	2.41241e-17	3.41463e-14
g46419	115.439	64.6968	166.181	2.56495	-1.35893	2.3105e-05	0.000796936
g46421	295.509	109.925	481.093	4.38269	-2.13182	9.13697e-13	4.01365e-10
g46426	92.1856	0	184.371	1090.25	-10.0904	9.90282e-17	1.30502e-13
g46438	32.1106	12.9884	51.2328	3.93276	-1.97554	0.00196857	0.0233208
g46476	235.143	60.093	410.193	6.8291	-2.7717	0.000337195	0.00629865
g46485	16.1461	1.23365	31.0586	25.3136	-4.66184	1.83526e-06	0.000106109
g46506	382.817	254.713	510.92	2.006	-1.00432	0.000163732	0.00362744
g46541	196.325	305.041	87.6084	0.287137	1.80019	0.00117716	0.0159417
g46551	103.071	42.7526	163.389	3.82209	-1.93436	0.00420498	0.040479
g46573	34.918	6.57976	63.2563	9.66943	-3.27343	4.9854e-05	0.00145774
g46577	82.714	110.995	54.4331	0.490066	1.02895	0.00267155	0.0292103
g46590	214.376	139.685	289.067	2.07004	-1.04966	2.54255e-06	0.00013705
g46598	710.901	974.599	447.203	0.458956	1.12357	0.00328501	0.0338757
g46599	62.8933	15.9866	109.8	6.86931	-2.78017	8.1392e-05	0.00212325
g46608	90.3503	16.6107	164.09	9.88076	-3.30462	0.000135071	0.00312469
g46634	1243.72	770.888	1716.56	2.22701	-1.15511	3.09033e-06	0.000160466
g46641	294.432	153.954	434.911	2.82646	-1.49899	4.26798e-05	0.0012813
g46650	424.023	0	848.046	5014.56	-12.2919	1.36396e-11	4.49367e-09
g46651	24.0473	0	48.0946	284.438	-8.15197	9.83594e-08	9.29725e-06
g46652	39.7389	4.41803	75.0597	17.1547	-4.10053	2.75366e-06	0.000145757
g46653	1503.3	5.06222	3001.53	595.103	-9.217	1.23897e-10	3.15027e-08
g46654	5.19908	0	10.3982	61.4778	-5.94199	0.000264301	0.00526082
g46656	16.3934	0	32.7868	193.916	-7.59929	8.61335e-07	5.66569e-05
g46657	670.497	1.26634	1339.73	1072.62	-10.0669	3.18679e-13	1.48524e-10
g46661	206.568	0.633172	412.503	670.381	-9.38884	1.20764e-15	1.12567e-12
g46662	91.6451	0	183.29	1083.83	-10.0819	6.48661e-08	6.47256e-06
g46666	1117.2	2.84927	2231.56	786.36	-9.61905	1.58043e-07	1.3696e-05
g46667	53.7864	0	107.573	636.157	-9.31324	1.72886e-10	4.29039e-08
g46673	479.873	0.633172	959.112	1544.91	-10.5933	8.16776e-12	2.86374e-09
g46674	675.961	446.28	905.643	2.02982	-1.02135	0.000519776	0.00876622
g46675	1215.4	510.585	1920.21	3.76131	-1.91123	3.77464e-07	2.8285e-05
g46677	496.51	178.17	814.85	4.57433	-2.19356	0.000605999	0.00983834
g46678	498.843	88.8223	908.864	10.2351	-3.35545	0.00152671	0.01932
g46679	800.818	238.493	1363.14	5.71563	-2.51491	2.31067e-16	2.59726e-13
g46681	6984.89	3378.05	10591.7	3.13558	-1.64873	7.23826e-09	1.02834e-06
g46685	93.161	46.4051	139.917	3.01803	-1.5936	1.74217e-05	0.000636524
g46694	28.5791	15.9401	41.2181	2.58642	-1.37096	0.00331057	0.0340657
g46740	132.686	40.9879	224.384	5.47519	-2.45291	0.000760441	0.0115646
g46741	220.614	355.966	85.2624	0.239584	2.06139	0.00259963	0.0286393
g46766	253.064	353.444	152.683	0.431829	1.21147	0.00325306	0.0336626
g46767	107.138	189.461	24.8143	0.130871	2.93378	1.93521e-05	0.000690551
g46780	8.37412	16.7482	0	0.0117913	6.40613	0.000495574	0.00844
g46782	800.178	1125.45	474.905	0.421909	1.245	0.000276718	0.00543159
g46783	54.1695	100.027	8.31229	0.0829237	3.59207	0.0001169	0.00280713
g46784	678.159	1081.35	274.964	0.254201	1.97596	2.41819e-05	0.000822205
g46802	3446.15	2044.06	4848.25	2.37198	-1.24609	2.36605e-08	2.7401e-06
g46823	1164.15	540.396	1787.91	3.3091	-1.72644	2.09041e-08	2.48103e-06
g46825	697.391	95.2078	1299.57	13.6548	-3.77134	9.76825e-29	5.33304e-25
g46841	35.8472	16.1231	55.5713	3.4434	-1.78384	0.00154901	0.0195431
g46844	136.584	29.6735	243.494	8.20386	-3.0363	0.000206248	0.00437898
g46852	326.34	170.823	481.857	2.82209	-1.49676	7.83448e-06	0.000337554
g46861	1659.01	1035.27	2282.76	2.20502	-1.14079	1.35613e-08	1.73335e-06
g46864	87.2521	12.9436	161.561	12.4895	-3.64264	8.28585e-06	0.000353816
g46878	2610.11	2.20508	5218.01	2379.14	-11.2162	5.33699e-12	1.94251e-09
g46881	33.285	7.94049	58.6294	7.38203	-2.88402	0.000256603	0.00514782
g46882	495.561	37.0024	954.121	25.7904	-4.68876	0.00373126	0.0371155
g46886	1604.82	473.73	2735.91	5.77543	-2.52993	8.93025e-16	8.98125e-13
g46893	332.536	85.7855	579.287	6.75575	-2.75612	4.92829e-06	0.000235725
g46894	44.5594	12.3727	76.7462	6.22344	-2.63771	1.25288e-06	7.73527e-05
g4707	2529.8	1662.51	3397.08	2.04333	-1.03092	0.00160902	0.0201613
g47072	386.509	104.562	668.455	6.39424	-2.67677	3.34832e-07	2.56438e-05
g47085	248.112	99.2927	396.932	3.99754	-1.99911	0.00333345	0.0342683
g47088	86.1147	119.73	52.4997	0.438834	1.18825	8.52921e-05	0.00219207
g47089	152.57	266.677	38.4624	0.144243	2.79343	2.97953e-05	0.00096745
g47100	752.636	1019.9	485.369	0.475783	1.07162	3.08784e-06	0.000160466
g47107	2031.07	1236.64	2825.51	2.28475	-1.19204	1.51605e-06	9.02477e-05
g4711	268.144	431.772	104.516	0.241986	2.047	9.42536e-10	1.89584e-07
g47114	2039.05	686.791	3391.3	4.93818	-2.30398	8.13692e-05	0.00212325
g47146	44.5713	8.60636	80.5362	9.35861	-3.22629	0.00264747	0.0290075
g47153	116.954	41.7148	192.194	4.60862	-2.20434	0.00454399	0.0428467
g47169	50.5083	68.4552	32.5613	0.475346	1.07295	0.00422832	0.0406014
g47182	802.101	471.507	1132.69	2.40295	-1.26481	5.02504e-06	0.000239156
g47184	157.34	37.47	277.209	7.40038	-2.8876	1.44367e-09	2.7725e-07
g4719	284.363	79.569	489.157	6.152	-2.62106	6.89462e-06	0.000305833
g47194	29.4608	16.2472	42.6745	2.62695	-1.39339	0.00222823	0.0255417
g47195	100.655	59.6338	141.677	2.37764	-1.24953	5.36678e-06	0.000251659
g47220	8.28365	0.603625	15.9637	26.2057	-4.71181	0.000820484	0.0121708
g47242	66.6642	37.7867	95.5417	2.53199	-1.34027	0.00476114	0.044358
g47274	47.0881	13.1995	80.9767	6.13674	-2.61747	1.54175e-05	0.000582224
g47288	930.793	1442.75	418.834	0.290305	1.78436	0.000157944	0.00352579
g4730	734.433	1045.11	423.753	0.405482	1.30229	1.63002e-05	0.00060716
g47325	960.209	1398.57	521.851	0.373098	1.42238	0.000259482	0.00518924
g47330	78.4088	106.417	50.4011	0.473612	1.07822	0.000828095	0.0122539
g47355	417.567	258.377	576.757	2.23242	-1.15861	0.000745308	0.0114025
g47357	45.6857	17.6877	73.6837	4.17364	-2.06131	0.000705276	0.0109648
g47368	884.931	1226.86	542.999	0.442551	1.17609	1.1045e-10	2.87147e-08
g47381	158.162	244.933	71.3909	0.291523	1.77832	0.000648432	0.0103557
g4742	726.947	368.408	1085.49	2.94673	-1.55911	0.00154269	0.0194835
g47441	13.4542	4.05495	22.8534	5.68258	-2.50655	0.00132487	0.0173816
g47461	784.829	481.245	1088.41	2.26222	-1.17774	6.69216e-13	3.00887e-10
g47469	25.7007	11.7253	39.6761	3.38786	-1.76038	0.00400144	0.0390209
g47532	8.56186	0	17.1237	101.161	-6.66052	0.000113685	0.00274287
g47618	171.623	270.45	72.7955	0.269031	1.89416	0.000176757	0.00385566
g47620	34.529	60.9176	8.14036	0.133992	2.89978	0.000119055	0.00284192
g47638	328.21	154.286	502.135	3.25519	-1.70274	2.70058e-07	2.11059e-05
g47641	1584.29	2331.3	837.273	0.359171	1.47726	0.000335988	0.00628817
g47644	292.121	469.899	114.344	0.24343	2.03842	0.0012449	0.0165772
g47648	43.3627	58.454	28.2713	0.483728	1.04773	0.00530042	0.0478618
g47660	554.703	1034.34	75.0651	0.0725926	3.78403	5.74874e-05	0.00163589
g47661	236.847	436.363	37.331	0.0856794	3.54491	2.14496e-16	2.48406e-13
g47665	24.0667	5.93697	42.1964	7.03335	-2.81421	0.000106016	0.00259471
g4768	445.492	632.401	258.582	0.408867	1.2903	0.00187609	0.0224689
g47688	4291.1	6118.46	2463.73	0.402676	1.31231	1.47399e-07	1.28905e-05
g47690	102.142	32.3746	171.909	5.31744	-2.41073	0.000345047	0.00641687
g47691	323.801	137.226	510.376	3.72084	-1.89563	0.00091937	0.0132737
g47726	56.6776	82.6868	30.6684	0.371377	1.42904	0.00132714	0.0173994
g47733	2826.39	1842.39	3810.39	2.0683	-1.04844	0.00283954	0.0305583
g47735	107.335	44.0761	170.594	3.87226	-1.95318	8.45152e-05	0.00217796
g47744	13.0165	0.316586	25.7164	78.0123	-6.28563	2.37733e-05	0.000814109
g47775	2333.41	553.271	4113.55	7.43503	-2.89434	0.00197172	0.0233436
g47780	1715	2290.06	1139.93	0.497768	1.00646	0.00367904	0.0367683
g47790	16.0175	4.29234	27.7427	6.46881	-2.6935	0.00543952	0.0487986
g47807	278.799	421.21	136.388	0.323932	1.62624	0.000499912	0.00849873
g47838	14.1473	2.99646	25.298	8.35944	-3.06341	0.000191442	0.00412189
g47975	188.924	103.537	274.311	2.651	-1.40654	0.00129277	0.01706
g4799	548.257	307.939	788.575	2.56065	-1.35651	0.000506635	0.00859119
g47993	432.432	225.087	639.777	2.84242	-1.50712	3.54464e-08	3.87045e-06
g4800	424.475	108.671	740.279	6.81206	-2.76809	3.01388e-05	0.000974476
g48016	91.752	44.5511	138.953	3.1242	-1.64349	4.98533e-05	0.00145774
g48087	113.251	47.5111	178.99	3.76638	-1.91318	0.00130533	0.0171664
g48116	7.79001	14.1229	1.45713	0.102144	3.29133	0.00303554	0.0321355
g48132	18.2277	32.8881	3.56741	0.108624	3.20259	0.000157708	0.00352258
g48140	190.938	38.6024	343.273	8.89154	-3.15243	1.2842e-05	0.000502335
g4820	438.566	72.0182	805.114	11.1774	-3.48252	0.000449737	0.00785898
g48216	29.2957	12.1601	46.4312	3.838	-1.94036	0.000993642	0.0140682
g48235	690.116	1000.89	379.345	0.37901	1.39969	2.24245e-05	0.000778382
g48266	754.339	1104.82	403.862	0.365592	1.45169	0.00349954	0.0354659
g48300	7.60799	14.1413	1.07472	0.0758315	3.72106	0.00183985	0.0222229
g48306	51.6917	99.4362	3.94727	0.0396331	4.65715	1.11549e-07	1.01987e-05
g48312	220.15	122.041	318.26	2.61022	-1.38417	0.000238014	0.00487208
g48344	101.862	48.5357	155.188	3.19858	-1.67743	3.08883e-06	0.000160466
g48345	940.302	495.209	1385.39	2.79798	-1.48438	1.82192e-06	0.000105497
g48395	7.43336	13.4243	1.44238	0.106927	3.2253	0.00292996	0.031304
g48477	655.88	157.627	1154.13	7.32173	-2.87218	0.00180876	0.0219255
g48489	202.591	75.522	329.66	4.36367	-2.12554	0.00341603	0.0348693
g48503	3250.77	4499.33	2002.22	0.445029	1.16803	1.87803e-05	0.00067519
g48531	14.484	2.81658	26.1514	9.3975	-3.23228	3.67062e-05	0.00113587
g48670	15.4998	27.4592	3.54045	0.129489	2.9491	0.00429697	0.0410954
g48674	22.3501	40.0888	4.61136	0.115631	3.1124	2.79254e-06	0.000147611
g48682	21650	13436.6	29863.5	2.22258	-1.15224	3.18095e-08	3.52366e-06
g48694	75.2302	42.3441	108.116	2.55546	-1.35358	0.00277201	0.0300363
g48707	5.54943	0	11.0989	65.6312	-6.03631	0.000121796	0.0028893
g48726	561.109	361.082	761.136	2.10779	-1.07573	0.000275958	0.00541947
g48737	536.285	784.253	288.317	0.367596	1.44381	5.50896e-05	0.00158775
g48740	876.805	1191.03	562.575	0.472299	1.08223	0.000127739	0.0029913
g4875	51.342	8.66073	94.0232	10.8713	-3.44245	7.55846e-05	0.00201297
g48811	2790.45	1755.63	3825.28	2.17891	-1.12361	6.56611e-05	0.00181313
g489	733.649	1079.33	387.968	0.35939	1.47638	0.00333236	0.0342683
g48926	16045.1	10272.7	21817.5	2.12389	-1.08671	2.32607e-08	2.71851e-06
g48951	863.796	1300.2	427.396	0.328646	1.60539	4.36014e-05	0.00130385
g48984	12.764	0.316586	25.2113	76.5849	-6.25899	2.68377e-05	0.000894209
g48996	26.2955	1.78448	50.8064	27.8779	-4.80105	1.18456e-09	2.33352e-07
g48998	32.9852	16.2129	49.7575	3.06594	-1.61633	0.00280252	0.0302639
g49009	14377.4	9391.41	19363.4	2.06185	-1.04394	1.47813e-06	8.85416e-05
g49031	56.6181	8.41686	104.819	12.4092	-3.63334	1.5762e-05	0.000591725
g49037	256.777	22.3029	491.25	22.0596	-4.46333	4.46402e-12	1.65633e-09
g49038	10.156	0	20.3119	120.166	-6.90888	2.01356e-06	0.000115026
g49041	4.1433	0	8.2866	48.9672	-5.61374	0.00106936	0.0148501
g4906	344.578	226.42	462.737	2.04384	-1.03128	0.000452718	0.00790023
g49063	3865.13	2400.91	5329.35	2.21972	-1.15038	6.24152e-10	1.29637e-07
g49139	55.8802	83.1683	28.5922	0.344178	1.53877	6.31947e-06	0.00028683
g49176	25.8365	41.3299	10.343	0.250591	1.99659	0.00123987	0.0165274
g49177	58.2662	83.221	33.3114	0.399996	1.32194	0.0030402	0.0321581
g49204	34.6928	10.5461	58.8396	5.60659	-2.48712	7.92385e-07	5.34084e-05
g49260	6.16034	11.2472	1.07345	0.0954037	3.38981	0.00549573	0.0491414
g4933	199.353	105.949	292.758	2.76612	-1.46786	4.24906e-08	4.49823e-06
g49354	17.8741	31.1087	4.63959	0.149346	2.74327	4.66966e-05	0.0013802
g4941	68.1247	40.8089	95.4406	2.33545	-1.2237	0.00376912	0.0373851
g4944	14.1216	0.921786	27.3215	29.6807	-4.89145	0.00247162	0.0276112
g49487	255.12	117.809	392.43	3.3317	-1.73626	1.83632e-05	0.00066339
g4952	809.716	506.217	1113.21	2.19955	-1.13721	0.000498935	0.00848967
g49527	21.7158	32.715	10.7165	0.328301	1.60691	0.00327693	0.033838
g49533	761.434	440.698	1082.17	2.45525	-1.29587	0.000608865	0.00987229
g49573	74.2037	3.42493	144.983	42.7224	-5.41692	4.1196e-15	3.02766e-12
g49582	93.0787	60.8498	125.308	2.05608	-1.0399	0.00104442	0.0146034
g49613	182.706	108.89	256.521	2.35644	-1.23661	0.000264684	0.00526572
g49677	29.7102	52.2489	7.17144	0.136987	2.86789	4.46269e-05	0.00132931
g49725	584.944	925.871	244.017	0.263526	1.92398	2.58711e-12	1.00889e-09
g49726	6.47433	12.2281	0.720551	0.0586459	4.09182	0.00203606	0.0239275
g4973	6797.81	3761.9	9833.72	2.61406	-1.38629	0.000328818	0.00619036
g49733	210.264	96.354	324.173	3.36473	-1.75049	6.46183e-08	6.46471e-06
g49740	505.412	219.538	791.286	3.60402	-1.84961	0.00188815	0.022578
g49793	1216.12	1660.6	771.641	0.464668	1.10573	0.00305657	0.0322621
g49794	9.45155	1.15446	17.7486	14.9385	-3.90097	0.00341411	0.0348589
g49799	653.62	313.833	993.408	3.1663	-1.6628	3.23322e-06	0.000166528
g4980	136.674	81.6141	191.735	2.34922	-1.23218	0.00255577	0.028303
g49813	1324.56	572.584	2076.53	3.62782	-1.8591	1.72417e-14	1.08021e-11
g49876	7201.83	10252.7	4150.99	0.404865	1.30449	3.58088e-05	0.00112081
g49910	1846.07	1194.43	2497.71	2.09124	-1.06436	0.000204791	0.00436017
g49921	44.7221	76.8047	12.6394	0.164138	2.60702	0.000414836	0.00739676
g49933	1043.86	577.965	1509.76	2.61279	-1.38559	7.21934e-05	0.00195259
g49978	924.168	505.781	1342.56	2.65423	-1.40829	5.39495e-06	0.000252361
g49980	74.3867	105.013	43.7608	0.417197	1.2612	0.00342858	0.03496
g49997	807.396	1135.89	478.903	0.42169	1.24574	4.69099e-05	0.0013837
g50050	225.015	126.959	323.071	2.54524	-1.3478	0.00192696	0.0229416
g5007	1391.51	571.209	2211.81	3.87173	-1.95298	1.00856e-11	3.45108e-09
g50084	207.5	117.967	297.033	2.51836	-1.33249	9.32605e-05	0.00234542
g50085	25.742	9.84631	41.6376	4.23326	-2.08177	0.00199062	0.0234946
g50124	130.068	56.816	203.321	3.58145	-1.84054	0.00340794	0.0348541
g50125	797.631	379.655	1215.61	3.20239	-1.67915	7.17372e-10	1.47397e-07
g50126	68.3475	11.8266	124.868	10.5984	-3.40578	7.1744e-08	7.09283e-06
g50129	35.6288	9.34984	61.9078	6.6555	-2.73455	1.92593e-05	0.000689171
g50139	22.7929	8.33942	37.2464	4.48357	-2.16465	4.8797e-05	0.00143232
g5015	894.88	523.514	1266.25	2.41878	-1.27428	1.86898e-13	9.04137e-11
g50190	5.91368	0.316586	11.5108	34.9251	-5.12619	0.000724786	0.0111871
g50217	1088.3	539.923	1636.68	3.0313	-1.59994	0.000299481	0.00576649
g50227	57.5879	24.2188	90.9569	3.7543	-1.90854	6.54886e-05	0.00180967
g50250	567.58	768.19	366.97	0.477636	1.06602	1.26272e-05	0.000496986
g50269	122.351	67.5326	177.169	2.62339	-1.39143	0.000117884	0.00282102
g50274	62.793	0	125.586	742.539	-9.53632	0.00149692	0.0190502
g50322	65.886	100.977	30.7953	0.305016	1.71304	0.00102411	0.0143891
g50325	72.9857	18.6745	127.297	6.84394	-2.77483	2.92413e-08	3.27717e-06
g50326	156.557	285.945	27.1689	0.0950595	3.39503	5.88098e-10	1.22816e-07
g50327	386.002	632.363	139.641	0.220787	2.17927	2.40235e-08	2.76052e-06
g5036	190.276	97.3559	283.197	2.91009	-1.54106	0.000106261	0.0025982
g50365	95.8803	37.7479	154.013	4.07986	-2.02852	0.00220489	0.0253351
g50398	7.93497	0	15.8699	93.7785	-6.55119	1.91196e-05	0.000685452
g50404	2239.97	3691.95	787.994	0.213441	2.22809	1.62761e-06	9.58432e-05
g50425	4324.84	2462.56	6187.12	2.51267	-1.32922	2.31098e-09	4.11764e-07
g50429	60.8355	97.718	23.9531	0.245331	2.0272	0.000138324	0.00318479
g50434	256.93	409.324	104.536	0.255461	1.96882	4.42186e-05	0.00132024
g50458	6401.27	9688.88	3113.65	0.321363	1.63772	2.92537e-05	0.000954731
g50459	1472.75	2003.5	941.986	0.47017	1.08875	0.00122422	0.0163874
g50466	136.264	183.997	88.5309	0.480872	1.05628	0.000305592	0.00585111
g50471	275.242	444.613	105.87	0.23807	2.07054	1.06443e-07	9.94605e-06
g50473	504.464	46.7327	962.195	20.6069	-4.36505	3.23281e-37	6.17742e-33
g5050	784.844	381.389	1188.3	3.11563	-1.63952	2.63184e-05	0.00088229
g50529	617.427	405.176	829.679	2.04748	-1.03385	5.62316e-05	0.00160974
g50543	507.544	929.17	85.9184	0.0924847	3.43464	4.07836e-22	1.29885e-18
g50564	26.4134	52.105	0.721824	0.0137674	6.1826	1.83653e-05	0.00066339
g50581	77889.3	42826.5	112952	2.63745	-1.39914	5.00123e-08	5.1518e-06
g50610	1115.27	724.046	1506.49	2.08084	-1.05716	0.00485365	0.044935
g50612	377.929	210.173	545.684	2.59689	-1.37679	0.00028641	0.00557034
g5065	311.184	457.008	165.36	0.361855	1.46652	4.42614e-09	7.1073e-07
g5075	159.631	278.462	40.8001	0.146526	2.77077	0.000116722	0.00280552
g5078	42.1087	81.0241	3.1934	0.0395229	4.66117	2.77615e-05	0.000918312
g50806	362.125	133.393	590.857	4.43161	-2.14783	1.88298e-07	1.56439e-05
[truncated: 828 more rows]

## Sheet: Table S3C
Table S3C GO enrichement assay for upregulated genes in different cell types
ID	Description	GeneRatio	BgRatio	pvalue	p.adjust	qvalue	geneID	Count	Cell_type
GO:0022625	cytosolic large ribosomal subunit	136/1428	228/60364	4.8766e-160	5.47642e-70	4.32734e-157	g39004/g35016/g2456/g43460/g4630/g333/g9018/g13931/g46617/g20819/g58362/g57671/g1044/g47269/g11735/g48994/g10185/g15906/g55302/g6113/g25117/g1573/g5120/g26463/g976/g5190/g3801/g3831/g5281/g20236/g50532/g19856/g53832/g23414/g30524/g35034/g9087/g42543/g1039/g31251/g4484/g11901/g35829/g5194/g5500/g30458/g13478/g13932/g49496/g10474/g25656/g47150/g27267/g9706/g43033/g49480/g25000/g60927/g4434/g23242/g…	136	PMC
GO:0009535	chloroplast thylakoid membrane	61/1428	115/60364	1.34198e-67	7.5352e-65	5.95414e-65	g29834/g35362/g9989/g37391/g5240/g9751/g33901/g24312/g5445/g10027/g30155/g39208/g8948/g17905/g53349/g37937/g20248/g1822/g55675/g59648/g61561/g43775/g25672/g31185/g7173/g34449/g55047/g37393/g53218/g13792/g7161/g61055/g43385/g26780/g1172/g31194/g60170/g42876/g9736/g38044/g24713/g58982/g31548/g54350/g59979/g58875/g31397/g34283/g13564/g54964/g50581/g34739/g37389/g280/g23740/g51191/g193/g15752/g41282/…	61	PMC
GO:0009536	plastid	88/1428	385/60364	2.73903e-59	1.02531e-56	8.10178e-57	g7125/g52527/g20149/g21739/g54429/g54359/g21844/g20458/g13324/g46227/g37391/g50425/g39208/g59505/g55622/g20358/g297/g13403/g54885/g61561/g25672/g17947/g31185/g29616/g23668/g37393/g29906/g38237/g21704/g24316/g43385/g39398/g60789/g1106/g38300/g1172/g41630/g17181/g1477/g25417/g20810/g61617/g4398/g60863/g57145/g41887/g60710/g16874/g33528/g54350/g59979/g58875/g31397/g34283/g13564/g45761/g54964/g50581/…	88	PMC
GO:0022627	cytosolic small ribosomal subunit	49/1428	80/60364	6.61808e-59	1.85803e-56	1.46817e-56	g873/g5092/g62795/g42823/g51669/g11431/g3651/g43896/g5155/g48978/g11275/g10329/g61980/g22143/g55157/g13021/g35255/g9924/g59753/g2036/g47257/g50955/g9891/g1608/g50405/g3336/g50555/g9811/g4438/g9923/g42483/g11539/g3668/g11523/g25356/g46581/g43091/g4773/g12975/g2187/g22105/g14547/g12278/g25966/g21742/g4371/g3295/g34067/g41011	49	PMC
GO:0015979	photosynthesis	55/1428	119/60364	1.07365e-56	2.41143e-54	1.90545e-54	g54082/g20149/g21557/g54429/g46227/g37391/g5240/g9751/g49009/g43774/g8948/g48926/g297/g20248/g54397/g58521/g48682/g9721/g31185/g7173/g34449/g8923/g53373/g42791/g37393/g53218/g7161/g43385/g50500/g11485/g26780/g1172/g20810/g4398/g8934/g29965/g42876/g9736/g24713/g58982/g54350/g59979/g58875/g20022/g31397/g34283/g13564/g45761/g54964/g50581/g34739/g37389/g280/g23740/g41282	55	PMC
GO:0015935	small ribosomal subunit	52/1428	110/60364	2.50879e-54	4.69562e-52	3.71037e-52	g21133/g61239/g33573/g13834/g33582/g52891/g62795/g42823/g31678/g11431/g20510/g41630/g14103/g61505/g52286/g55157/g35034/g8758/g47257/g1608/g50405/g34136/g50555/g13168/g30590/g25101/g1269/g25790/g13302/g54005/g5551/g8419/g33586/g11523/g25356/g32070/g2432/g4773/g45455/g23476/g59670/g43656/g51469/g48072/g59599/g58197/g10413/g29212/g4371/g899/g60433/g41011	52	PMC
GO:0009523	photosystem II	37/1428	67/60364	2.18959e-42	3.51272e-40	2.77567e-40	g54082/g21557/g37391/g24312/g43774/g8948/g20248/g61561/g9721/g25672/g31185/g34449/g30850/g13303/g42791/g37393/g53218/g43385/g50500/g26780/g1172/g29965/g24713/g58982/g54350/g59979/g58875/g20022/g34283/g13564/g54964/g50581/g34739/g37389/g280/g23740/g41282	37	PMC
GO:0019843	rRNA binding	44/1428	129/60364	1.42736e-38	2.00365e-36	1.58324e-36	g5752/g39165/g21133/g35016/g19479/g60272/g4630/g3987/g33573/g31396/g13834/g33582/g42823/g57671/g11431/g20510/g55302/g41630/g10329/g9924/g25656/g47257/g27267/g50555/g20707/g3609/g25790/g860/g9923/g35068/g381/g33586/g11523/g62735/g43656/g63054/g59599/g20246/g10413/g63063/g4371/g61062/g24749/g8744	44	PMC
GO:0009579	thylakoid	35/1428	83/60364	8.40992e-35	1.04937e-32	8.29189e-33	g29834/g54082/g35362/g37391/g33901/g39208/g50214/g54397/g31185/g7173/g34449/g42791/g37393/g30153/g7161/g61055/g43385/g50500/g1172/g38044/g54350/g59979/g58875/g31397/g34283/g13564/g54964/g50581/g34739/g37389/g280/g41282/g4799/g59367/g20981	35	PMC
GO:0009522	photosystem I	26/1428	39/60364	2.55591e-33	2.87028e-31	2.26803e-31	g20149/g37391/g5240/g9751/g49009/g48926/g48682/g31185/g7173/g37393/g7161/g43385/g20810/g9736/g54350/g59979/g58875/g31397/g34283/g13564/g45761/g54964/g50581/g34739/g37389/g280	26	PMC
GO:0022626	cytosolic ribosome	29/1428	81/60364	1.32246e-26	1.35011e-24	1.06683e-24	g52891/g31678/g20510/g14103/g61505/g35034/g8758/g34136/g13168/g30590/g25101/g1269/g25790/g13302/g54005/g5551/g8419/g32070/g2432/g45455/g23476/g59670/g51469/g48072/g59599/g58197/g10413/g29212/g899	29	PMC
GO:0002181	cytoplasmic translation	20/1428	31/60364	1.74875e-25	1.63654e-23	1.29315e-23	g62795/g1044/g15906/g23440/g976/g3801/g19856/g55157/g1039/g27267/g20707/g34396/g20592/g54098/g23442/g58115/g55620/g25184/g20336/g20002	20	PMC
GO:0042254	ribosome biogenesis	44/1428	273/60364	1.22178e-23	1.05543e-21	8.33974e-22	g6895/g44735/g44770/g52891/g23055/g51669/g31678/g47269/g11735/g16908/g60513/g43896/g10329/g61980/g3831/g61505/g35255/g16904/g9924/g3840/g24568/g44972/g4438/g42815/g9923/g5551/g8702/g59969/g851/g55112/g59882/g4773/g43656/g40876/g29212/g55714/g26852/g18133/g24749/g12376/g18625/g25527/g18864/g42947	44	PMC
GO:0006414	translational elongation	26/1428	80/60364	9.57043e-23	7.67685e-21	6.06607e-21	g33567/g19770/g55622/g24592/g13931/g38237/g13932/g10474/g50542/g33528/g27240/g51022/g4763/g26588/g4592/g4758/g44482/g47334/g4759/g63563/g48035/g63677/g34566/g53679/g41883/g5820	26	PMC
GO:0015995	chlorophyll biosynthetic process	19/1428	34/60364	1.50155e-22	1.12416e-20	8.88283e-21	g54429/g46227/g31592/g11866/g54465/g24401/g297/g58521/g53373/g49063/g54990/g44968/g27011/g44940/g4398/g42876/g14255/g6549/g54894	19	PMC
GO:0015934	large ribosomal subunit	24/1428	71/60364	1.4315e-21	1.00474e-19	7.93919e-20	g2456/g31104/g47140/g333/g9018/g57671/g1044/g25117/g23440/g5190/g50532/g53832/g1039/g11901/g5194/g45409/g33595/g58177/g11925/g23442/g11899/g49432/g29197/g16776	24	PMC
GO:0000028	ribosomal small subunit assembly	18/1428	43/60364	1.68558e-18	1.11348e-16	8.79844e-17	g62795/g55157/g2036/g3336/g50555/g13168/g25101/g1269/g8419/g381/g32070/g45455/g2187/g58197/g10413/g14547/g25966/g3295	18	PMC
GO:0009768	photosynthesis, light harvesting in photosystem I	14/1428	22/60364	4.32748e-18	2.69986e-16	2.13337e-16	g37391/g31185/g37393/g43385/g54350/g59979/g58875/g34283/g13564/g54964/g50581/g34739/g37389/g280	14	PMC
GO:0009765	photosynthesis, light harvesting	14/1428	25/60364	5.64538e-17	3.33672e-15	2.6366e-15	g37391/g31185/g37393/g43385/g54350/g59979/g58875/g34283/g13564/g54964/g50581/g34739/g37389/g280	14	PMC
GO:0009654	photosystem II oxygen evolving complex	13/1428	21/60364	1.17548e-16	6.60032e-15	5.21542e-15	g54082/g8948/g20248/g9721/g34449/g42791/g53218/g26780/g1172/g29965/g24713/g58982/g23740	13	PMC
GO:0016168	chlorophyll binding	14/1428	27/60364	2.43064e-16	1.29981e-14	1.02708e-14	g37391/g31185/g37393/g43385/g54350/g59979/g58875/g34283/g13564/g54964/g50581/g34739/g37389/g280	14	PMC
GO:0003746	translation elongation factor activity	20/1428	74/60364	4.63384e-16	2.36536e-14	1.86905e-14	g33567/g19770/g55622/g24592/g38237/g50542/g33528/g51022/g4763/g4758/g44482/g47334/g4759/g63563/g48035/g63677/g34566/g53679/g41883/g5820	20	PMC
GO:0008652	amino acid biosynthetic process	29/1428	204/60364	1.34012e-14	6.54329e-13	5.17036e-13	g59505/g49936/g50936/g25309/g46800/g63984/g42961/g11405/g34205/g33490/g42717/g29095/g42746/g50247/g54880/g9333/g42970/g233/g8240/g25580/g13298/g22408/g60494/g11788/g60801/g46575/g4161/g43819/g54948	29	PMC
GO:0070180	large ribosomal subunit rRNA binding	11/1428	18/60364	3.41759e-14	1.59915e-12	1.26361e-12	g35016/g10185/g3831/g49480/g5266/g3840/g48009/g4731/g8253/g25527/g16776	11	PMC
GO:0009538	photosystem I reaction center	9/1428	12/60364	4.67094e-13	2.09819e-11	1.65794e-11	g5240/g9751/g49009/g48926/g48682/g7173/g7161/g9736/g31397	9	PMC
GO:0030054	cell junction	30/1428	257/60364	9.22045e-13	3.98252e-11	3.1469e-11	g58673/g13931/g46617/g20278/g3831/g20236/g13021/g13932/g2036/g3840/g34136/g42646/g25790/g13302/g27240/g10974/g34266/g11523/g1634/g59670/g12975/g59599/g4731/g48574/g12278/g20721/g34307/g39036/g25527/g49317	30	PMC
GO:0009570	chloroplast stroma	20/1428	109/60364	1.291e-12	5.3696e-11	4.24293e-11	g54057/g26136/g46227/g25257/g43386/g12892/g41083/g17947/g24994/g29906/g25309/g24316/g46357/g54075/g15362/g721/g11405/g41282/g23936/g14620	20	PMC
GO:0010207	photosystem II assembly	9/1428	15/60364	9.96653e-12	3.99729e-10	3.15857e-10	g24312/g54397/g38436/g30850/g13303/g20638/g1172/g29965/g41282	9	PMC
GO:0006364	rRNA processing	34/1428	385/60364	7.4625e-11	2.88979e-09	2.28345e-09	g42642/g49608/g43297/g52891/g31678/g11735/g41630/g25117/g3801/g61505/g2036/g45409/g24568/g34136/g25101/g42646/g58177/g54005/g32110/g55112/g45455/g59670/g51469/g58197/g16879/g38185/g29212/g31861/g55714/g26852/g39036/g12376/g8744/g42947	34	PMC
GO:0031969	chloroplast membrane	13/1428	53/60364	2.40718e-10	9.01087e-09	7.12018e-09	g31823/g21704/g34549/g25698/g34320/g31856/g49604/g3883/g163/g46602/g29907/g1548/g5032	13	PMC
GO:0042273	ribosomal large subunit biogenesis	16/1428	93/60364	6.10156e-10	2.21034e-08	1.74656e-08	g1044/g11735/g25117/g3801/g5281/g1039/g49496/g9706/g45409/g24568/g58177/g851/g20336/g55714/g29197/g12376	16	PMC
GO:0009416	response to light stimulus	16/1428	95/60364	8.45932e-10	2.96869e-08	2.34579e-08	g37391/g31185/g37393/g43385/g54350/g59979/g58875/g34283/g13564/g54964/g50581/g34739/g37389/g280/g34782/g43685	16	PMC
GO:0009706	chloroplast inner membrane	11/1428	39/60364	1.14107e-09	3.8831e-08	3.06834e-08	g20715/g33880/g21704/g23982/g20741/g58847/g163/g59513/g29907/g4074/g48491	11	PMC
GO:0045454	cell redox homeostasis	12/1428	51/60364	1.9883e-09	6.56723e-08	5.18927e-08	g58240/g58267/g25157/g55047/g29906/g5114/g50500/g43049/g31194/g19972/g25076/g43258	12	PMC
GO:0009532	plastid stroma	7/1428	12/60364	2.91716e-09	9.35992e-08	7.39599e-08	g43297/g39398/g38300/g1477/g60710/g23468/g11405	7	PMC
GO:0000027	ribosomal large subunit assembly	13/1428	67/60364	5.34185e-09	1.66636e-07	1.31672e-07	g5120/g3831/g25656/g4434/g3840/g46517/g34396/g11269/g3609/g49934/g20246/g25527/g18864	13	PMC
GO:0000463	maturation of LSU-rRNA from tricistronic rRNA transcript (SSU-rRNA, 5.8S rRNA, LSU-rRNA)	10/1428	35/60364	5.70174e-09	1.73055e-07	1.36744e-07	g20236/g31251/g60927/g41685/g31564/g25663/g3594/g48574/g12376/g49317	10	PMC
GO:0019288	isopentenyl diphosphate biosynthetic process, methylerythritol 4-phosphate pathway	7/1428	13/60364	6.19052e-09	1.82946e-07	1.4456e-07	g43167/g54990/g44968/g33780/g44940/g19638/g59727	7	PMC
GO:0004176	ATP-dependent peptidase activity	13/1428	74/60364	1.89062e-08	5.44402e-07	4.30173e-07	g23939/g30695/g43297/g39398/g38300/g1477/g60710/g43148/g23468/g23730/g55282/g38327/g9967	13	PMC
GO:0030388	fructose 1,6-bisphosphate metabolic process	7/1428	16/60364	3.87773e-08	1.08867e-06	8.60244e-07	g3803/g24370/g59775/g29379/g58903/g53926/g42350	7	PMC
GO:0009534	chloroplast thylakoid	9/1428	34/60364	6.96594e-08	1.90799e-06	1.50765e-06	g1169/g23939/g30695/g43297/g50500/g25593/g41282/g55282/g9967	9	PMC
GO:0009658	chloroplast organization	13/1428	84/60364	9.08602e-08	2.42943e-06	1.91968e-06	g1863/g12819/g8476/g43297/g20638/g3899/g4477/g5577/g1705/g38686/g27423/g4074/g59973	13	PMC
GO:0043022	ribosome binding	14/1428	101/60364	1.21958e-07	3.18508e-06	2.51678e-06	g26774/g13403/g52286/g49962/g15497/g765/g61217/g44482/g47334/g23476/g63563/g34930/g63677/g55714	14	PMC
GO:0008379	thioredoxin peroxidase activity	6/1428	12/60364	1.41844e-07	3.53979e-06	2.79706e-06	g58240/g58267/g25157/g55047/g31194/g25076	6	PMC
GO:0009773	photosynthetic electron transport in photosystem I	6/1428	12/60364	1.41844e-07	3.53979e-06	2.79706e-06	g53349/g60183/g33877/g31548/g15752/g10000	6	PMC
GO:0006782	protoporphyrinogen IX biosynthetic process	8/1428	30/60364	3.54216e-07	8.64748e-06	6.83304e-06	g60257/g11866/g54465/g38959/g42657/g35004/g39213/g41998	8	PMC
GO:0019898	extrinsic component of membrane	10/1428	54/60364	4.94387e-07	1.16881e-05	9.23565e-06	g54082/g8948/g20248/g34449/g42791/g53218/g26780/g24713/g58982/g23740	10	PMC
GO:0006779	porphyrin-containing compound biosynthetic process	9/1428	42/60364	4.9958e-07	1.16881e-05	9.23565e-06	g60257/g11866/g54465/g38959/g42657/g63907/g35004/g39213/g41998	9	PMC
GO:0042651	thylakoid membrane	7/1428	22/60364	5.1045e-07	1.16987e-05	9.24402e-06	g416/g53218/g36554/g53745/g27423/g41282/g46708	7	PMC
GO:0034599	cellular response to oxidative stress	10/1428	58/60364	9.89498e-07	2.14641e-05	1.69604e-05	g58240/g58267/g25157/g55047/g16821/g31194/g34007/g14242/g3974/g25076	10	PMC
GO:0003755	peptidyl-prolyl cis-trans isomerase activity	15/1428	137/60364	9.92938e-07	2.14641e-05	1.69604e-05	g43959/g58036/g30153/g47081/g53015/g49962/g52957/g58019/g32110/g61217/g30434/g13667/g31935/g20289/g39572	15	PMC
GO:0016671	oxidoreductase activity, acting on a sulfur group of donors, disulfide as acceptor	7/1428	24/60364	9.93885e-07	2.14641e-05	1.69604e-05	g25257/g24063/g61672/g59568/g43664/g193/g54314	7	PMC
GO:0016853	isomerase activity	29/1428	441/60364	1.03225e-06	2.1872e-05	1.72828e-05	g11866/g18506/g34019/g43959/g56269/g58036/g30153/g61043/g47081/g53015/g29334/g46800/g42978/g52957/g20570/g58019/g32110/g61217/g1634/g50100/g30434/g54894/g13667/g5074/g38185/g31935/g20289/g24738/g20814	29	PMC
GO:0033014	tetrapyrrole biosynthetic process	7/1428	25/60364	1.35212e-06	2.8119e-05	2.2219e-05	g60257/g11866/g24401/g38959/g42657/g58521/g41998	7	PMC
GO:0006783	heme biosynthetic process	8/1428	37/60364	2.0172e-06	4.11876e-05	3.25455e-05	g60257/g54465/g38959/g42657/g35004/g39213/g32017/g41998	8	PMC
GO:0051117	ATPase binding	8/1428	38/60364	2.5021e-06	5.0176e-05	3.96479e-05	g43297/g39398/g38300/g1477/g60710/g43148/g23468/g26852	8	PMC
GO:0042026	protein refolding	11/1428	80/60364	2.94248e-06	5.79719e-05	4.58081e-05	g50608/g10238/g31384/g6158/g10265/g59502/g10264/g34266/g4707/g45616/g1275	11	PMC
GO:0048564	photosystem I assembly	5/1428	11/60364	3.01849e-06	5.84443e-05	4.61813e-05	g30155/g39208/g13792/g26780/g4477	5	PMC
GO:0016209	antioxidant activity	7/1428	30/60364	5.1639e-06	9.82891e-05	7.76658e-05	g58240/g58267/g25157/g55047/g31194/g42372/g25076	7	PMC
GO:0005759	mitochondrial matrix	18/1428	218/60364	5.30886e-06	9.93642e-05	7.85152e-05	g19770/g31189/g9078/g333/g9018/g55040/g25790/g765/g381/g34266/g58859/g20438/g59599/g22408/g57772/g57664/g1275/g13550	18	PMC
GO:0032543	mitochondrial translation	9/1428	55/60364	5.4077e-06	9.95549e-05	7.8666e-05	g33567/g55622/g38237/g11793/g9051/g7978/g35340/g53714/g60433	9	PMC
GO:0006515	protein quality control for misfolded or incompletely synthesized proteins	8/1428	42/60364	5.55335e-06	0.000100587	7.94817e-05	g43297/g39398/g38300/g1477/g60710/g43148/g23468/g38327	8	PMC
GO:0051085	chaperone cofactor-dependent protein refolding	11/1428	91/60364	1.04911e-05	0.000187008	0.000147769	g31189/g9078/g50608/g6158/g55040/g59502/g46564/g34266/g59409/g45616/g51258	11	PMC
GO:0051536	iron-sulfur cluster binding	19/1428	254/60364	1.21823e-05	0.000213762	0.00016891	g7125/g5118/g5789/g37937/g33235/g19690/g43167/g14255/g42961/g58859/g11405/g42717/g42970/g8240/g47774/g57772/g57664/g20981/g59727	19	PMC
GO:0042802	identical protein binding	26/1428	424/60364	1.25608e-05	0.000217011	0.000171477	g6895/g25380/g44735/g44770/g58240/g58267/g56269/g52286/g42994/g9263/g42350/g26050/g58060/g4285/g20438/g25076/g25580/g22408/g35340/g24795/g31030/g15599/g60203/g24749/g49818/g29206	26	PMC
GO:0071944	cell periphery	13/1428	132/60364	1.64493e-05	0.000279888	0.000221161	g34533/g1608/g34136/g50555/g9099/g4763/g4758/g4799/g4773/g4759/g59670/g48035/g20721	13	PMC
GO:0006457	protein folding	26/1428	435/60364	1.95067e-05	0.000326956	0.000258353	g31189/g9078/g12892/g50608/g10238/g31384/g6158/g55040/g10265/g11485/g59502/g10264/g46564/g49962/g8934/g34266/g61217/g59409/g4707/g51258/g20498/g31935/g39572/g25551/g20814/g4176	26	PMC
GO:0016597	amino acid binding	8/1428	50/60364	2.13678e-05	0.000352883	0.00027884	g29134/g62593/g50936/g31521/g35314/g33990/g47412/g60494	8	PMC
GO:0071482	cellular response to light stimulus	5/1428	16/60364	2.58549e-05	0.000420797	0.000332504	g28261/g20638/g57145/g57028/g932	5	PMC
GO:0009543	chloroplast thylakoid lumen	5/1428	17/60364	3.59126e-05	0.000576141	0.000455253	g30850/g13303/g26780/g15620/g25593	5	PMC
GO:0016620	oxidoreductase activity, acting on the aldehyde or oxo group of donors, NAD or NADP as acceptor	11/1428	104/60364	3.74102e-05	0.000591713	0.000467558	g53721/g32551/g23981/g37944/g51120/g59925/g32562/g26015/g25580/g61406/g26014	11	PMC
GO:0006094	gluconeogenesis	7/1428	42/60364	5.34355e-05	0.000833445	0.000658569	g3803/g24370/g62/g34019/g58903/g53926/g42350	7	PMC
GO:0016117	carotenoid biosynthetic process	5/1428	19/60364	6.48772e-05	0.000998042	0.00078863	g29616/g42978/g16874/g31261/g1548	5	PMC
GO:0006098	pentose-phosphate shunt	6/1428	31/60364	7.69022e-05	0.00116704	0.00092217	g9194/g56269/g32106/g50100/g54791/g15599	6	PMC
GO:0005854	nascent polypeptide-associated complex	5/1428	20/60364	8.48171e-05	0.00125328	0.000990316	g867/g20702/g14520/g14517/g58663	5	PMC
GO:1901259	chloroplast rRNA processing	5/1428	20/60364	8.48171e-05	0.00125328	0.000990316	g33489/g63877/g38686/g45581/g59973	5	PMC
GO:0004365	glyceraldehyde-3-phosphate dehydrogenase (NAD+) (phosphorylating) activity	4/1428	11/60364	9.01044e-05	0.00129727	0.00102507	g32551/g23981/g37944/g32562	4	PMC
GO:0004781	sulfate adenylyltransferase (ATP) activity	4/1428	11/60364	9.01044e-05	0.00129727	0.00102507	g4763/g4758/g4759/g48035	4	PMC
GO:0006536	glutamate metabolic process	6/1428	32/60364	9.27583e-05	0.00130209	0.00102889	g60257/g54465/g38959/g25580/g22408/g41998	6	PMC
GO:0009941	chloroplast envelope	6/1428	32/60364	9.27583e-05	0.00130209	0.00102889	g54057/g179/g15362/g9077/g5136/g26067	6	PMC
GO:0044183	protein folding chaperone	8/1428	63/60364	0.000117541	0.00162961	0.00128768	g26136/g31189/g9078/g55040/g11485/g49962/g8934/g61217	8	PMC
GO:0003924	GTPase activity	25/1428	462/60364	0.000135864	0.00186068	0.00147026	g33567/g55622/g38237/g46679/g54346/g45063/g60513/g35236/g33528/g58643/g9051/g765/g9483/g4763/g851/g4758/g20781/g4759/g24870/g59404/g48035/g46634/g40876/g58187/g17275	25	PMC
GO:2000142	regulation of DNA-templated transcription initiation	5/1428	22/60364	0.000138509	0.00187404	0.00148082	g28261/g20638/g57145/g57028/g932	5	PMC
GO:0009082	branched-chain amino acid biosynthetic process	6/1428	35/60364	0.000156398	0.00209089	0.00165218	g46800/g42717/g29095/g54880/g11788/g43819	6	PMC
GO:0010027	thylakoid membrane organization	5/1428	23/60364	0.000173541	0.00226612	0.00179063	g10027/g54397/g2433/g49604/g33485	5	PMC
GO:0045036	protein targeting to chloroplast	5/1428	23/60364	0.000173541	0.00226612	0.00179063	g20715/g179/g59443/g50517/g9483	5	PMC
GO:0004462	lactoylglutathione lyase activity	4/1428	13/60364	0.00018797	0.0023718	0.00187414	g25976/g25818/g47812/g31030	4	PMC
GO:0005986	sucrose biosynthetic process	4/1428	13/60364	0.00018797	0.0023718	0.00187414	g3803/g24370/g58903/g42350	4	PMC
GO:0050790	regulation of catalytic activity	4/1428	13/60364	0.00018797	0.0023718	0.00187414	g4763/g4758/g4759/g48035	4	PMC
GO:0009528	plastid inner membrane	4/1428	14/60364	0.000258227	0.00315205	0.00249068	g21704/g163/g59513/g29907	4	PMC
GO:0016655	oxidoreductase activity, acting on NAD(P)H, quinone or similar compound as acceptor	4/1428	14/60364	0.000258227	0.00315205	0.00249068	g40891/g50214/g13219/g1822	4	PMC
GO:0042132	fructose 1,6-bisphosphate 1-phosphatase activity	4/1428	14/60364	0.000258227	0.00315205	0.00249068	g3803/g24370/g58903/g42350	4	PMC
GO:0050661	NADP binding	11/1428	131/60364	0.000298826	0.0036084	0.00285128	g60257/g32551/g38959/g23981/g37944/g55219/g32562/g11405/g54791/g41998/g25956	11	PMC
GO:0006000	fructose metabolic process	5/1428	26/60364	0.000319859	0.00378107	0.00298771	g3803/g24370/g58903/g42350/g9927	5	PMC
GO:1901342	regulation of vasculature development	5/1428	26/60364	0.000319859	0.00378107	0.00298771	g6895/g44735/g44770/g62/g17275	5	PMC
GO:0016835	carbon-oxygen lyase activity	8/1428	73/60364	0.000331427	0.003877	0.00306352	g42642/g49936/g25790/g42717/g54803/g9333/g59599/g13298	8	PMC
GO:0051537	2 iron, 2 sulfur cluster binding	10/1428	112/60364	0.00034011	0.00393756	0.00311137	g7125/g5789/g37937/g11668/g332/g14255/g42717/g47774/g57772/g57664	10	PMC
GO:0016987	sigma factor activity	5/1428	27/60364	0.000384936	0.00441105	0.00348551	g28261/g20638/g57145/g57028/g932	5	PMC
GO:0003743	translation initiation factor activity	15/1428	231/60364	0.000449146	0.00509486	0.00402584	g26774/g13403/g34407/g54346/g50566/g15497/g41282/g29915/g44482/g20301/g63563/g63677/g55714/g25820/g9058	15	PMC
GO:0019252	starch biosynthetic process	5/1428	28/60364	0.000459529	0.00510942	0.00403735	g54359/g13324/g39231/g46489/g59752	5	PMC
GO:0051174	regulation of phosphorus metabolic process	5/1428	28/60364	0.000459529	0.00510942	0.00403735	g4763/g4758/g4759/g48035/g60203	5	PMC
GO:0006413	translational initiation	15/1428	233/60364	0.000491434	0.00541059	0.00427532	g26774/g13403/g34407/g54346/g50566/g15497/g41282/g29915/g44482/g20301/g63563/g63677/g55714/g25820/g9058	15	PMC
GO:0008299	isoprenoid biosynthetic process	10/1428	118/60364	0.000515919	0.00562502	0.00444476	g38646/g54990/g44968/g33780/g44940/g54894/g43451/g19638/g61185/g31261	10	PMC
GO:0045901	positive regulation of translational elongation	4/1428	17/60364	0.000580152	0.00626452	0.00495008	g44482/g47334/g63563/g63677	4	PMC
GO:0015986	proton motive force-driven ATP synthesis	6/1428	46/60364	0.000723585	0.00773892	0.00611511	g21739/g21844/g59328/g60183/g33877/g34031	6	PMC
GO:0140662	ATP-dependent protein folding chaperone	10/1428	125/60364	0.000810036	0.00858179	0.00678113	g12892/g50608/g10238/g31384/g6158/g10265/g10264/g46564/g59409/g4707	10	PMC
GO:0004069	L-aspartate:2-oxoglutarate aminotransferase activity	4/1428	19/60364	0.000909873	0.00954942	0.00754573	g50447/g50936/g34205/g22408	4	PMC
GO:0006002	fructose 6-phosphate metabolic process	5/1428	33/60364	0.00100639	0.0104645	0.00826884	g3803/g24370/g58903/g42350/g9927	5	PMC
GO:0006006	glucose metabolic process	6/1428	49/60364	0.00101728	0.0104807	0.00828164	g32551/g23981/g37944/g32562/g1634/g54791	6	PMC
GO:0009099	valine biosynthetic process	4/1428	20/60364	0.00111614	0.0113947	0.00900386	g46800/g42717/g54880/g43819	4	PMC
GO:0017148	negative regulation of translation	8/1428	89/60364	0.00125062	0.0126214	0.00997315	g43460/g5190/g52286/g5194/g25790/g59599/g49432/g63992	8	PMC
GO:0051923	sulfation	6/1428	51/60364	0.00125877	0.0126214	0.00997315	g37880/g37895/g37883/g37881/g37874/g31953	6	PMC
GO:0004550	nucleoside diphosphate kinase activity	4/1428	21/60364	0.00135307	0.0134251	0.0106082	g30995/g9099/g26453/g13717	4	PMC
GO:0032544	plastid translation	3/1428	10/60364	0.00139968	0.0134251	0.0106082	g252/g20358/g49612	3	PMC
GO:0045948	positive regulation of translational initiation	3/1428	10/60364	0.00139968	0.0134251	0.0106082	g15321/g55664/g38294	3	PMC
GO:0050482	arachidonic acid secretion	3/1428	10/60364	0.00139968	0.0134251	0.0106082	g36364/g36358/g11335	3	PMC
GO:0070181	small ribosomal subunit rRNA binding	3/1428	10/60364	0.00139968	0.0134251	0.0106082	g33573/g33586/g62735	3	PMC
GO:0008483	transaminase activity	9/1428	112/60364	0.00141066	0.0134251	0.0106082	g46545/g50447/g11866/g50936/g54240/g34205/g29095/g22408/g24795	9	PMC
GO:0051082	unfolded protein binding	14/1428	233/60364	0.00144354	0.0136227	0.0107643	g867/g31189/g9078/g12892/g55040/g59502/g20702/g46564/g34266/g59409/g45616/g51258/g58663/g25551	14	PMC
GO:0031386	protein tag activity	5/1428	36/60364	0.00150775	0.01411	0.0111494	g35034/g39244/g5551/g899/g30965	5	PMC
GO:0035999	tetrahydrofolate interconversion	4/1428	22/60364	0.00162298	0.0150628	0.0119023	g29134/g21484/g50803/g9285	4	PMC
GO:0000413	protein peptidyl-prolyl isomerization	7/1428	73/60364	0.00171228	0.0157614	0.0124543	g30153/g47081/g53015/g52957/g31935/g20289/g39572	7	PMC
GO:0009704	de-etiolation	3/1428	11/60364	0.00189077	0.0169866	0.0134225	g42575/g4477/g53064	3	PMC
GO:0051920	peroxiredoxin activity	3/1428	11/60364	0.00189077	0.0169866	0.0134225	g58240/g58267/g25076	3	PMC
GO:0110102	ribulose bisphosphate carboxylase complex assembly	3/1428	11/60364	0.00189077	0.0169866	0.0134225	g20189/g11485/g8934	3	PMC
GO:0008289	lipid binding	15/1428	267/60364	0.00192807	0.0171843	0.0135786	g7950/g7995/g36364/g7958/g61812/g53721/g36358/g62017/g30417/g35021/g58786/g26205/g11613/g61056/g9274	15	PMC
GO:0004812	aminoacyl-tRNA ligase activity	9/1428	120/60364	0.0022727	0.0200964	0.0158797	g33990/g26854/g7978/g35340/g25949/g46295/g17275/g8744/g33674	9	PMC
GO:0006418	tRNA aminoacylation for protein translation	8/1428	98/60364	0.00231507	0.0203111	0.0160494	g26854/g7978/g35340/g25949/g46295/g17275/g8744/g33674	8	PMC
GO:0016813	hydrolase activity, acting on carbon-nitrogen (but not peptide) bonds, in linear amidines	3/1428	12/60364	0.00247682	0.0212325	0.0167775	g13155/g39175/g9185	3	PMC
GO:0043335	protein unfolding	3/1428	12/60364	0.00247682	0.0212325	0.0167775	g49962/g61217/g1275	3	PMC
GO:0045039	protein insertion into mitochondrial inner membrane	3/1428	12/60364	0.00247682	0.0212325	0.0167775	g20715/g179/g24291	3	PMC
GO:0010020	chloroplast fission	4/1428	25/60364	0.0026531	0.0225714	0.0178354	g21576/g42779/g463/g1281	4	PMC
GO:0000460	maturation of 5.8S rRNA	5/1428	41/60364	0.00271945	0.0227906	0.0180086	g14103/g55112/g23476/g55714/g18864	5	PMC
GO:0009909	regulation of flower development	5/1428	41/60364	0.00271945	0.0227906	0.0180086	g30000/g50362/g50353/g17703/g16707	5	PMC
GO:0008878	glucose-1-phosphate adenylyltransferase activity	3/1428	13/60364	0.00316347	0.0261219	0.0206409	g54359/g13324/g59752	3	PMC
GO:0033120	positive regulation of RNA splicing	3/1428	13/60364	0.00316347	0.0261219	0.0206409	g15321/g55664/g38294	3	PMC
GO:1901566	organonitrogen compound biosynthetic process	10/1428	151/60364	0.00331263	0.0271539	0.0214564	g29134/g62593/g50447/g11866/g54240/g34205/g21484/g25693/g22408/g24795	10	PMC
GO:0009707	chloroplast outer membrane	5/1428	43/60364	0.00336017	0.027344	0.0216066	g12819/g23987/g25417/g9483/g38636	5	PMC
GO:0016717	oxidoreductase activity, acting on paired donors, with oxidation of a pair of donors resulting in the reduction of molecular oxygen to two molecules of water	5/1428	44/60364	0.00371819	0.0300397	0.0237367	g25506/g24977/g31490/g49940/g21510	5	PMC
GO:0000470	maturation of LSU-rRNA	3/1428	14/60364	0.00395581	0.0310655	0.0245473	g55112/g31861/g18133	3	PMC
GO:0016554	cytidine to uridine editing	3/1428	14/60364	0.00395581	0.0310655	0.0245473	g59012/g5271/g54268	3	PMC
GO:0019707	protein-cysteine S-acyltransferase activity	3/1428	14/60364	0.00395581	0.0310655	0.0245473	g6895/g44735/g44770	3	PMC
GO:0042644	chloroplast nucleoid	3/1428	14/60364	0.00395581	0.0310655	0.0245473	g9989/g3967/g11405	3	PMC
GO:0099080	supramolecular complex	6/1428	64/60364	0.00404489	0.0315445	0.0249257	g58673/g20278/g3831/g3840/g1634/g25527	6	PMC
GO:0016226	iron-sulfur cluster assembly	6/1428	66/60364	0.00471117	0.0364872	0.0288313	g33235/g19690/g25693/g57772/g57664/g33485	6	PMC
GO:0031492	nucleosomal DNA binding	3/1428	15/60364	0.00485838	0.0371001	0.0293157	g13164/g5334/g29769	3	PMC
GO:0005777	peroxisome	12/1428	212/60364	0.00491706	0.0371001	0.0293157	g25380/g16925/g50425/g43411/g54340/g9263/g4799/g46634/g20026/g24671/g33782/g38327	12	PMC
GO:0098869	cellular oxidant detoxification	14/1428	267/60364	0.00493277	0.0371001	0.0293157	g16925/g42084/g58240/g16805/g58267/g25157/g55047/g31194/g34007/g14242/g42372/g29422/g25076/g26139	14	PMC
GO:0042274	ribosomal small subunit biogenesis	5/1428	47/60364	0.00495549	0.0371001	0.0293157	g42823/g11431/g47257/g11523/g4371	5	PMC
GO:0070013	intracellular organelle lumen	5/1428	47/60364	0.00495549	0.0371001	0.0293157	g35004/g39213/g42475/g38327/g24291	5	PMC
GO:0009739	response to gibberellin	4/1428	30/60364	0.00523493	0.0389326	0.0307636	g41108/g52942/g25001/g58360	4	PMC
GO:0043229	intracellular organelle	20/1428	449/60364	0.00572884	0.0423256	0.0334447	g39165/g3987/g58673/g16805/g20278/g50566/g3831/g3840/g1852/g13073/g24664/g1634/g13992/g55129/g61406/g20704/g9274/g25820/g25527/g29043	20	PMC
GO:0006542	glutamine biosynthetic process	3/1428	16/60364	0.00587521	0.0425411	0.033615	g6895/g44735/g44770	3	PMC
GO:0004029	aldehyde dehydrogenase (NAD+) activity	4/1428	31/60364	0.00589948	0.0425411	0.033615	g59925/g26015/g9729/g61406	4	PMC
GO:0051289	protein homotetramerization	4/1428	31/60364	0.00589948	0.0425411	0.033615	g29134/g53721/g58060/g20438	4	PMC
GO:0019901	protein kinase binding	10/1428	164/60364	0.00590953	0.0425411	0.033615	g54681/g52286/g25790/g34266/g4763/g4758/g4759/g59599/g48035/g11040	10	PMC
GO:0006790	sulfur compound metabolic process	7/1428	92/60364	0.0062681	0.0448349	0.0354275	g3990/g4763/g4758/g4759/g39148/g48035/g24671	7	PMC
GO:0051287	NAD binding	11/1428	193/60364	0.0065781	0.0467413	0.0369339	g42837/g32551/g23981/g62112/g37944/g56247/g55219/g32562/g25956/g20229/g26014	11	PMC
GO:0005504	fatty acid binding	4/1428	32/60364	0.00661787	0.0467413	0.0369339	g7950/g7995/g7958/g55198	4	PMC
GO:0000302	response to reactive oxygen species	3/1428	17/60364	0.00700986	0.0475225	0.0375512	g34007/g14242/g26514	3	PMC
GO:0004356	glutamine synthetase activity	3/1428	17/60364	0.00700986	0.0475225	0.0375512	g6895/g44735/g44770	3	PMC
GO:0009527	plastid outer membrane	3/1428	17/60364	0.00700986	0.0475225	0.0375512	g25417/g9483/g38636	3	PMC
GO:0045261	proton-transporting ATP synthase complex, catalytic core F(1)	3/1428	17/60364	0.00700986	0.0475225	0.0375512	g59328/g60183/g33877	3	PMC
GO:0071586	CAAX-box protein processing	3/1428	17/60364	0.00700986	0.0475225	0.0375512	g38350/g47266/g56039	3	PMC
GO:0080120	CAAX-box protein maturation	3/1428	17/60364	0.00700986	0.0475225	0.0375512	g38350/g47266/g56039	3	PMC
GO:0006730	one-carbon metabolic process	5/1428	51/60364	0.0070247	0.0475225	0.0375512	g29134/g15866/g21484/g50803/g9285	5	PMC
GO:0008097	5S rRNA binding	4/1428	33/60364	0.00739187	0.0491188	0.0388125	g39165/g5120/g49934/g18864	4	PMC
GO:0009627	systemic acquired resistance	4/1428	33/60364	0.00739187	0.0491188	0.0388125	g7950/g7995/g7958/g55198	4	PMC
GO:0071806	protein transmembrane transport	4/1428	33/60364	0.00739187	0.0491188	0.0388125	g20715/g5577/g25417/g179	4	PMC
GO:0030527	structural constituent of chromatin	14/548	98/60364	3.55883e-13	2.0886e-10	1.67972e-10	g251/g10035/g31178/g10031/g4799/g55015/g55014/g55871/g4800/g4820/g13164/g29528/g16914/g60865	14	SMC
GO:0022625	cytosolic large ribosomal subunit	19/548	228/60364	4.87991e-13	2.0886e-10	1.67972e-10	g9087/g1257/g8785/g58177/g61062/g54616/g16684/g4484/g49496/g59468/g48994/g13478/g41685/g60927/g45409/g23417/g25656/g44972/g333	19	SMC
GO:0009536	plastid	21/548	385/60364	9.40924e-11	2.68477e-08	2.15917e-08	g10035/g10031/g4799/g34930/g18102/g55622/g21704/g55871/g4800/g39208/g31185/g60710/g17181/g41630/g4398/g9483/g23468/g61617/g8185/g765/g43041	21	SMC
GO:0000786	nucleosome	14/548	150/60364	1.27075e-10	2.71941e-08	2.18703e-08	g54085/g251/g10035/g31178/g10031/g4799/g55015/g55014/g55871/g4800/g4820/g13164/g50217/g60865	14	SMC
GO:0000502	proteasome complex	13/548	128/60364	2.02258e-10	3.46265e-08	2.78477e-08	g38669/g4478/g28080/g26616/g54602/g5233/g49760/g20351/g16151/g1972/g3567/g60507/g40432	13	SMC
GO:0046982	protein heterodimerization activity	17/548	264/60364	4.69869e-10	6.70347e-08	5.39113e-08	g54085/g251/g10035/g31178/g10031/g4799/g55015/g31734/g55014/g55871/g4800/g4429/g57861/g4820/g21279/g61457/g60865	17	SMC
GO:0005743	mitochondrial inner membrane	16/548	279/60364	7.97895e-09	9.75712e-07	7.84697e-07	g13661/g22580/g48337/g48041/g51362/g24695/g1341/g25421/g32017/g55787/g19465/g47077/g38032/g63395/g64127/g765	16	SMC
GO:0009535	chloroplast thylakoid membrane	11/548	115/60364	9.49942e-09	1.01644e-06	8.1745e-07	g53349/g39208/g31185/g33901/g20248/g43465/g60170/g55047/g23740/g31194/g24713	11	SMC
GO:0015995	chlorophyll biosynthetic process	7/548	34/60364	2.12823e-08	2.02418e-06	1.62791e-06	g24401/g54990/g54465/g44940/g27011/g44968/g4398	7	SMC
GO:0009579	thylakoid	9/548	83/60364	7.10729e-08	6.08384e-06	4.89281e-06	g10035/g10031/g4799/g30153/g55871/g4800/g39208/g31185/g33901	9	SMC
GO:0000325	plant-type vacuole	6/548	29/60364	2.16698e-07	1.6863e-05	1.35617e-05	g10035/g10031/g4799/g55871/g4800/g55099	6	SMC
GO:0005694	chromosome	15/548	354/60364	1.1351e-06	7.57795e-05	6.09441e-05	g251/g10035/g31178/g10031/g4799/g55015/g55014/g55871/g4800/g59080/g31411/g4820/g13164/g17437/g60865	15	SMC
GO:1902600	proton transmembrane transport	12/548	223/60364	1.15086e-06	7.57795e-05	6.09441e-05	g13661/g59946/g16375/g48041/g10504/g42829/g19596/g58768/g34211/g55099/g58873/g49923	12	SMC
GO:0019843	rRNA binding	9/548	129/60364	3.06489e-06	0.000187396	0.00015071	g61062/g11523/g41630/g8744/g35068/g381/g62735/g4371/g25656	9	SMC
GO:0019288	isopentenyl diphosphate biosynthetic process, methylerythritol 4-phosphate pathway	4/548	13/60364	4.50136e-06	0.000240823	0.000193677	g54990/g33780/g44940/g44968	4	SMC
GO:0033180	proton-transporting V-type ATPase, V1 domain	4/548	13/60364	4.50136e-06	0.000240823	0.000193677	g42829/g58768/g55099/g49923	4	SMC
GO:0003746	translation elongation factor activity	7/548	74/60364	5.20465e-06	0.000262069	0.000210764	g42780/g33567/g55622/g19770/g61457/g34566/g63677	7	SMC
GO:0006414	translational elongation	7/548	80/60364	8.76696e-06	0.000416918	0.000335298	g42780/g33567/g55622/g19770/g61457/g34566/g63677	7	SMC
GO:0070469	respirasome	6/548	54/60364	9.72241e-06	0.00043802	0.000352269	g13661/g22580/g48337/g24695/g25421/g63395	6	SMC
GO:0005750	mitochondrial respiratory chain complex III	4/548	18/60364	1.85822e-05	0.000757444	0.000609159	g13661/g48337/g51362/g63395	4	SMC
GO:0006122	mitochondrial electron transport, ubiquinol to cytochrome c	4/548	18/60364	1.85822e-05	0.000757444	0.000609159	g13661/g48337/g51362/g63395	4	SMC
GO:0008652	amino acid biosynthetic process	10/548	204/60364	2.00465e-05	0.000779992	0.000627293	g63984/g24631/g16764/g11405/g26957/g25580/g13298/g46575/g42961/g42717	10	SMC
GO:0046933	proton-transporting ATP synthase activity, rotational mechanism	5/548	40/60364	3.06469e-05	0.00111807	0.000899183	g48041/g10504/g42829/g58768/g55099	5	SMC
GO:0000398	mRNA splicing, via spliceosome	13/548	360/60364	3.13476e-05	0.00111807	0.000899183	g50331/g37410/g8704/g35172/g25674/g13710/g53880/g26962/g21279/g41965/g7251/g17051/g35220	13	SMC
GO:0003743	translation initiation factor activity	10/548	231/60364	5.74404e-05	0.00196676	0.00158173	g55847/g60695/g8704/g10504/g54346/g43735/g9884/g7689/g63677/g31273	10	SMC
GO:0006413	translational initiation	10/548	233/60364	6.17213e-05	0.00203206	0.00163424	g55847/g60695/g8704/g10504/g54346/g43735/g9884/g7689/g63677/g31273	10	SMC
GO:0031072	heat shock protein binding	6/548	75/60364	6.45407e-05	0.00204618	0.0016456	g19459/g59502/g34361/g34218/g46564/g51258	6	SMC
GO:0036402	proteasome-activating activity	4/548	27/60364	9.9889e-05	0.00305375	0.00245592	g5233/g16151/g1972/g60507	4	SMC
GO:0005747	mitochondrial respiratory chain complex I	5/548	54/60364	0.000132688	0.00380219	0.00305783	g22580/g24695/g25421/g13566/g38032	5	SMC
GO:1901800	positive regulation of proteasomal protein catabolic process	4/548	29/60364	0.000133254	0.00380219	0.00305783	g5233/g16151/g1972/g60507	4	SMC
GO:0005681	spliceosomal complex	11/548	310/60364	0.000146168	0.00403613	0.00324598	g8704/g35172/g13710/g9561/g19666/g20788/g34308/g26962/g21279/g17051/g35220	11	SMC
GO:0009532	plastid stroma	3/548	12/60364	0.000154014	0.00411987	0.00331332	g11405/g60710/g23468	3	SMC
GO:0006334	nucleosome assembly	7/548	126/60364	0.000162885	0.00422514	0.00339798	g10035/g10031/g4799/g55871/g4800/g13164/g50217	7	SMC
GO:0009414	response to water deprivation	5/548	57/60364	0.000171796	0.00432522	0.00347847	g10035/g10031/g4799/g55871/g4800	5	SMC
GO:0051085	chaperone cofactor-dependent protein refolding	6/548	91/60364	0.000189086	0.0046245	0.00371916	g19459/g59502/g34361/g34218/g46564/g51258	6	SMC
GO:0071806	protein transmembrane transport	4/548	33/60364	0.000223081	0.00530437	0.00426594	g42829/g5577/g58768/g43465	4	SMC
GO:0000775	chromosome, centromeric region	5/548	61/60364	0.000236935	0.00548153	0.00440841	g10035/g10031/g4799/g55871/g4800	5	SMC
GO:0004175	endopeptidase activity	5/548	63/60364	0.000275804	0.00617598	0.00496691	g54437/g54602/g49760/g40432/g8185	5	SMC
GO:0005839	proteasome core complex	4/548	35/60364	0.000281382	0.00617598	0.00496691	g54602/g49760/g3567/g40432	4	SMC
GO:0046034	ATP metabolic process	3/548	15/60364	0.00031213	0.00667957	0.00537191	g42829/g58768/g55099	3	SMC
GO:0043022	ribosome binding	6/548	101/60364	0.000333143	0.00695538	0.00559372	g55847/g42780/g34930/g43465/g63677/g765	6	SMC
GO:0046961	proton-transporting ATPase activity, rotational mechanism	5/548	66/60364	0.000342945	0.00698954	0.0056212	g42829/g19596/g58768/g55099/g49923	5	SMC
GO:0015935	small ribosomal subunit	6/548	110/60364	0.000525781	0.0104667	0.00841765	g2432/g32070/g11523/g41630/g41011/g4371	6	SMC
GO:0030014	CCR4-NOT complex	4/548	43/60364	0.000626275	0.0121839	0.00979865	g31098/g5724/g33860/g59929	4	SMC
GO:0008540	proteasome regulatory particle, base subcomplex	4/548	44/60364	0.000683993	0.0130111	0.0104639	g5233/g16151/g1972/g60507	4	SMC
GO:0006457	protein folding	12/548	435/60364	0.000724866	0.0134834	0.0108437	g20498/g52130/g59502/g4707/g34361/g30328/g60156/g34218/g44416/g46564/g45846/g51258	12	SMC
GO:0009228	thiamine biosynthetic process	3/548	20/60364	0.000756077	0.0134834	0.0108437	g54990/g44940/g44968	3	SMC
GO:0019773	proteasome core complex, alpha-subunit complex	3/548	20/60364	0.000756077	0.0134834	0.0108437	g54602/g49760/g3567	3	SMC
GO:0005777	peroxisome	8/548	212/60364	0.000773573	0.0135139	0.0108682	g24671/g10035/g10031/g4799/g55871/g4800/g38327/g33782	8	SMC
GO:0015979	photosynthesis	6/548	119/60364	0.000795581	0.0136203	0.0109539	g49009/g31185/g20248/g4398/g23740/g24713	6	SMC
GO:0042026	protein refolding	5/548	80/60364	0.000831531	0.0139567	0.0112244	g19459/g59502/g4707/g34218/g1275	5	SMC
GO:0009654	photosystem II oxygen evolving complex	3/548	21/60364	0.000876162	0.014423	0.0115994	g20248/g23740/g24713	3	SMC
GO:0043161	proteasome-mediated ubiquitin-dependent protein catabolic process	8/548	219/60364	0.000953848	0.0154055	0.0123896	g38669/g26616/g54602/g5233/g49760/g20351/g16151/g1972	8	SMC
GO:0000785	chromatin	10/548	330/60364	0.000978624	0.015513	0.012476	g4285/g13479/g13512/g22260/g31411/g29528/g16914/g34972/g22464/g50217	10	SMC
GO:0009506	plasmodesma	5/548	86/60364	0.00115231	0.0179342	0.0144232	g10035/g10031/g4799/g55871/g4800	5	SMC
GO:0045454	cell redox homeostasis	4/548	51/60364	0.00119773	0.0182017	0.0146384	g43049/g41751/g55047/g31194	4	SMC
GO:0003924	GTPase activity	12/548	462/60364	0.00121203	0.0182017	0.0146384	g33567/g55622/g54346/g54252/g45063/g58187/g20781/g1038/g53795/g9483/g43371/g765	12	SMC
GO:0031981	nuclear lumen	6/548	131/60364	0.0013083	0.0193087	0.0155286	g10035/g10031/g4799/g55871/g4800/g63918	6	SMC
GO:0071944	cell periphery	6/548	132/60364	0.00136026	0.0194156	0.0156146	g10035/g10031/g4799/g52130/g55871/g4800	6	SMC
GO:0010498	proteasomal protein catabolic process	4/548	53/60364	0.00138359	0.0194156	0.0156146	g54602/g49760/g3567/g40432	4	SMC
GO:0031969	chloroplast membrane	4/548	53/60364	0.00138359	0.0194156	0.0156146	g34320/g21704/g31856/g46602	4	SMC
GO:0005682	U5 snRNP	3/548	25/60364	0.00147489	0.020363	0.0163766	g37410/g9561/g35220	3	SMC
GO:0042273	ribosomal large subunit biogenesis	5/548	93/60364	0.00163293	0.0221871	0.0178435	g58177/g57831/g49496/g45409/g12700	5	SMC
GO:0030163	protein catabolic process	5/548	97/60364	0.001966	0.0262952	0.0211474	g5233/g16151/g1972/g38327/g60507	5	SMC
GO:0005788	endoplasmic reticulum lumen	4/548	59/60364	0.00206048	0.0271349	0.0218227	g19459/g34361/g34218/g46564	4	SMC
GO:0051536	iron-sulfur cluster binding	8/548	254/60364	0.00242044	0.0313924	0.0252467	g13661/g53771/g25421/g11405/g26957/g42961/g42717/g51243	8	SMC
GO:0060255	regulation of macromolecule metabolic process	3/548	30/60364	0.00251747	0.0319694	0.0257107	g25229/g31560/g802	3	SMC
GO:0006325	chromatin organization	8/548	256/60364	0.00253962	0.0319694	0.0257107	g61250/g34161/g4285/g55196/g13512/g29528/g47892/g16914	8	SMC
GO:0006541	glutamine metabolic process	5/548	108/60364	0.00313587	0.038903	0.031287	g16764/g26957/g54296/g42961/g50288	5	SMC
GO:0009523	photosystem II	4/548	67/60364	0.00327827	0.0400885	0.0322404	g31185/g20248/g23740/g24713	4	SMC
GO:0008380	RNA splicing	7/548	212/60364	0.00343395	0.0408051	0.0328167	g37410/g9561/g41630/g34308/g26962/g21279/g35220	7	SMC
GO:0006397	mRNA processing	11/548	459/60364	0.00352124	0.0408051	0.0328167	g37410/g9561/g32564/g8786/g20788/g34308/g26962/g21279/g5392/g34374/g35220	11	SMC
GO:0000932	P-body	5/548	111/60364	0.0035269	0.0408051	0.0328167	g54602/g49760/g1972/g21279/g56520	5	SMC
GO:0045948	positive regulation of translational initiation	2/548	10/60364	0.00352754	0.0408051	0.0328167	g55664/g38294	2	SMC
GO:0046540	U4/U6 x U5 tri-snRNP complex	3/548	34/60364	0.00361225	0.0412278	0.0331566	g37410/g35172/g9561	3	SMC
GO:0000428	DNA-directed RNA polymerase complex	5/548	114/60364	0.00395174	0.0444502	0.0357482	g30499/g12267/g59162/g38485/g47096	5	SMC
GO:0005759	mitochondrial matrix	7/548	218/60364	0.00399844	0.0444502	0.0357482	g32950/g53771/g381/g19770/g765/g1275/g333	7	SMC
GO:0000276	mitochondrial proton-transporting ATP synthase complex, coupling factor F(o)	2/548	11/60364	0.00428559	0.0452897	0.0364234	g48041/g10504	2	SMC
GO:0004615	phosphomannomutase activity	2/548	11/60364	0.00428559	0.0452897	0.0364234	g50218/g1634	2	SMC
GO:0009704	de-etiolation	2/548	11/60364	0.00428559	0.0452897	0.0364234	g42575/g4477	2	SMC
GO:0048564	photosystem I assembly	2/548	11/60364	0.00428559	0.0452897	0.0364234	g39208/g4477	2	SMC
GO:0008299	isoprenoid biosynthetic process	5/548	118/60364	0.00457349	0.0468465	0.0376754	g54990/g33780/g44940/g44968/g47073	5	SMC
GO:0032981	mitochondrial respiratory chain complex I assembly	3/548	37/60364	0.00459709	0.0468465	0.0376754	g22580/g25421/g38032	3	SMC
GO:0042277	peptide binding	3/548	37/60364	0.00459709	0.0468465	0.0376754	g43465/g45846/g48288	3	SMC
GO:0051117	ATPase binding	3/548	38/60364	0.00495785	0.0499284	0.040154	g60710/g7641/g23468	3	SMC
GO:0046961	proton-transporting ATPase activity, rotational mechanism	14/1195	66/60364	3.91744e-11	4.19949e-08	3.31539e-08	g38594/g31435/g58768/g42829/g55099/g39341/g12522/g30101/g60914/g63282/g6295/g54958/g34054/g34035	14	U_EC
GO:0000323	lytic vacuole	21/1195	183/60364	1.32492e-10	7.10157e-08	5.6065e-08	g23156/g16965/g20578/g35468/g373/g58768/g29063/g51186/g31162/g25933/g12008/g25789/g60914/g63282/g61061/g20020/g54958/g767/g20239/g13700/g5038	21	U_EC
GO:0000226	microtubule cytoskeleton organization	21/1195	194/60364	3.94396e-10	1.40931e-07	1.11261e-07	g4973/g11677/g51025/g61579/g4449/g60270/g21444/g12705/g42946/g10066/g58683/g34932/g30151/g60556/g34164/g41714/g61218/g55594/g20583/g49369/g30787	21	U_EC
GO:0005200	structural constituent of cytoskeleton	9/1195	33/60364	1.14039e-08	3.05625e-06	2.41283e-06	g4973/g11677/g60270/g42946/g34932/g45695/g60556/g41714/g20583	9	U_EC
GO:0012505	endomembrane system	22/1195	275/60364	4.23033e-08	7.3393e-06	5.79418e-06	g23156/g35468/g58297/g7736/g10102/g26717/g17583/g21727/g16369/g20571/g14800/g42862/g4784/g42682/g61259/g60914/g63282/g25067/g54958/g50275/g53937/g14677	22	U_EC
GO:0098552	side of membrane	12/1195	78/60364	4.48359e-08	7.3393e-06	5.79418e-06	g4104/g4284/g59483/g29841/g61253/g30398/g54155/g42093/g54220/g2267/g59030/g10666	12	U_EC
GO:0010143	cutin biosynthetic process	7/1195	19/60364	4.79245e-08	7.3393e-06	5.79418e-06	g56819/g34092/g5538/g18081/g43348/g18089/g43560	7	U_EC
GO:0015250	water channel activity	9/1195	40/60364	7.14015e-08	9.5678e-06	7.55353e-06	g4732/g55284/g37613/g19675/g10331/g8733/g4812/g54953/g59817	9	U_EC
GO:0000278	mitotic cell cycle	18/1195	200/60364	1.21692e-07	1.44948e-05	1.14433e-05	g4973/g11677/g51025/g61579/g4449/g60270/g21444/g42946/g58683/g34932/g25933/g60556/g25789/g41714/g20020/g55594/g20583/g30787	18	U_EC
GO:0005774	vacuolar membrane	19/1195	228/60364	1.84196e-07	1.97458e-05	1.55888e-05	g20578/g38594/g373/g31435/g58768/g29063/g63942/g25933/g12008/g25789/g60914/g63282/g61061/g20020/g54958/g34035/g13700/g5038/g14677	19	U_EC
GO:1902600	proton transmembrane transport	18/1195	223/60364	6.13631e-07	5.98011e-05	4.72114e-05	g53642/g38594/g31435/g58768/g42829/g55099/g63942/g25923/g39341/g12522/g30101/g60914/g63282/g6295/g54958/g34054/g34035/g39766	18	U_EC
GO:0035970	peptidyl-threonine dephosphorylation	10/1195	66/60364	6.8832e-07	6.14899e-05	4.85447e-05	g35727/g54420/g59823/g4951/g50356/g54461/g34275/g12716/g59622/g42831	10	U_EC
GO:0003924	GTPase activity	27/1195	462/60364	8.03334e-07	6.62441e-05	5.2298e-05	g4973/g40877/g23238/g46829/g29555/g30460/g7736/g15319/g59813/g17980/g17583/g29063/g23233/g42946/g23363/g34932/g59405/g31341/g60556/g42682/g41714/g61061/g55594/g20583/g30787/g9074/g30448	27	U_EC
GO:0032509	endosome transport via multivesicular body sorting pathway	6/1195	18/60364	9.00082e-07	6.89206e-05	5.4411e-05	g31361/g47842/g25933/g25789/g20020/g34439	6	U_EC
GO:0007017	microtubule-based process	9/1195	55/60364	1.27274e-06	9.09588e-05	7.18096e-05	g4973/g11677/g60270/g42946/g34932/g45695/g60556/g41714/g20583	9	U_EC
GO:0051050	positive regulation of transport	10/1195	71/60364	1.37776e-06	9.23099e-05	7.28762e-05	g51025/g4449/g24627/g23233/g47637/g58683/g14800/g25789/g61061/g20020	10	U_EC
GO:0009733	response to auxin	18/1195	241/60364	1.87884e-06	0.000118478	9.3535e-05	g55052/g56072/g56070/g56071/g56073/g60892/g56084/g56289/g56068/g56119/g56069/g56122/g56094/g59783/g56127/g17420/g34030/g27227	18	U_EC
GO:0015267	channel activity	10/1195	74/60364	2.0319e-06	0.000120021	9.47537e-05	g4732/g55284/g37613/g1310/g19675/g10331/g8733/g4812/g54953/g59817	10	U_EC
GO:0030497	fatty acid elongation	5/1195	12/60364	2.12724e-06	0.000120021	9.47537e-05	g25622/g29829/g307/g4813/g27454	5	U_EC
GO:0006633	fatty acid biosynthetic process	21/1195	325/60364	2.78194e-06	0.000147934	0.00011679	g63628/g29224/g25665/g8434/g29269/g27170/g33892/g12852/g13381/g29829/g20800/g60068/g13494/g18102/g24975/g4813/g23509/g27454/g63249/g59487/g4683	21	U_EC
GO:0009734	auxin-activated signaling pathway	17/1195	224/60364	2.89796e-06	0.000147934	0.00011679	g13174/g13217/g13867/g5344/g13819/g13218/g12152/g8424/g8426/g62179/g13864/g26685/g13270/g47162/g29122/g42441/g51198	17	U_EC
GO:0033180	proton-transporting V-type ATPase, V1 domain	5/1195	13/60364	3.40016e-06	0.000165681	0.000130801	g58768/g42829/g55099/g60914/g6295	5	U_EC
GO:0046034	ATP metabolic process	5/1195	15/60364	7.67619e-06	0.00034287	0.000270687	g58768/g42829/g55099/g12522/g60914	5	U_EC
GO:0090447	glycerol-3-phosphate 2-O-acyltransferase activity	5/1195	15/60364	7.67619e-06	0.00034287	0.000270687	g56819/g18081/g43348/g18089/g43560	5	U_EC
GO:0016762	xyloglucan:xyloglucosyl transferase activity	7/1195	39/60364	1.03565e-05	0.000444085	0.000350593	g54659/g54657/g29104/g54377/g23481/g46451/g54376	7	U_EC
GO:0031410	cytoplasmic vesicle	18/1195	277/60364	1.29335e-05	0.00053326	0.000420994	g23156/g39016/g35468/g15319/g46312/g59813/g60523/g21727/g46566/g45955/g34079/g62058/g7665/g3856/g53937/g24052/g38860/g31360	18	U_EC
GO:0033365	protein localization to organelle	11/1195	112/60364	1.48528e-05	0.000589713	0.000465563	g51025/g4449/g17583/g58683/g25933/g25789/g55886/g58358/g20020/g30787/g43465	11	U_EC
GO:0009698	phenylpropanoid metabolic process	9/1195	75/60364	1.76585e-05	0.000676069	0.000533738	g34092/g27170/g5538/g25246/g19518/g55289/g51141/g54808/g4683	9	U_EC
GO:0016050	vesicle organization	8/1195	58/60364	1.83824e-05	0.000679516	0.00053646	g15319/g373/g21727/g23363/g14800/g25933/g60914/g30787	8	U_EC
GO:0010411	xyloglucan metabolic process	7/1195	43/60364	2.02541e-05	0.000720829	0.000569075	g54659/g54657/g29104/g54377/g23481/g46451/g54376	7	U_EC
GO:0000221	vacuolar proton-transporting V-type ATPase, V1 domain	5/1195	18/60364	2.08449e-05	0.000720829	0.000569075	g58768/g60914/g63282/g6295/g54958	5	U_EC
GO:0006897	endocytosis	15/1195	210/60364	2.23592e-05	0.000749034	0.000591342	g39016/g11808/g33365/g35324/g21727/g14800/g61215/g645/g62058/g7665/g63282/g25821/g61061/g34336/g19751	15	U_EC
GO:0044042	glucan metabolic process	7/1195	44/60364	2.36753e-05	0.000769089	0.000607176	g54659/g54657/g29104/g54377/g23481/g46451/g54376	7	U_EC
GO:0005768	endosome	17/1195	266/60364	2.75124e-05	0.000852318	0.000672882	g31588/g46829/g29555/g7736/g31361/g23233/g47637/g59405/g25933/g25789/g42682/g61259/g7665/g20020/g25097/g14677/g34439	17	U_EC
GO:0006833	water transport	5/1195	19/60364	2.78275e-05	0.000852318	0.000672882	g4732/g55284/g19675/g8733/g54953	5	U_EC
GO:0009740	gibberellic acid mediated signaling pathway	6/1195	31/60364	2.86502e-05	0.00085314	0.000673532	g4400/g59971/g43274/g43289/g1311/g50211	6	U_EC
GO:0009873	ethylene-activated signaling pathway	14/1195	196/60364	4.14981e-05	0.00120232	0.000949203	g51968/g34127/g43231/g43233/g43232/g43234/g5499/g59147/g60882/g4488/g55154/g54022/g48094/g20630	14	U_EC
GO:0007035	vacuolar acidification	5/1195	21/60364	4.7122e-05	0.00132934	0.00104948	g58768/g42829/g30101/g60914/g34054	5	U_EC
GO:0070973	protein localization to endoplasmic reticulum exit site	4/1195	12/60364	6.66304e-05	0.00183148	0.00144591	g29755/g34422/g31708/g539	4	U_EC
GO:0015078	proton transmembrane transporter activity	6/1195	36/60364	6.96643e-05	0.001867	0.00147395	g38594/g31435/g25923/g6295/g34035/g13700	6	U_EC
GO:0033179	proton-transporting V-type ATPase, V0 domain	5/1195	23/60364	7.54011e-05	0.00197146	0.00155642	g38594/g31435/g30101/g34054/g34035	5	U_EC
GO:0030234	enzyme regulator activity	9/1195	91/60364	8.31555e-05	0.00212244	0.00167561	g53040/g51025/g25354/g31704/g58979/g51050/g58683/g60135/g6593	9	U_EC
GO:0004722	protein serine/threonine phosphatase activity	14/1195	211/60364	9.18999e-05	0.00229109	0.00180875	g35727/g54420/g59823/g4951/g50356/g35826/g13499/g54461/g49362/g34275/g12716/g59622/g42831/g4904	14	U_EC
GO:0046933	proton-transporting ATP synthase activity, rotational mechanism	6/1195	40/60364	0.000128343	0.00310987	0.00245516	g58768/g42829/g55099/g25923/g12522/g60914	6	U_EC
GO:0032409	regulation of transporter activity	4/1195	14/60364	0.000130545	0.00310987	0.00245516	g51025/g4449/g24627/g58683	4	U_EC
GO:0010008	endosome membrane	12/1195	167/60364	0.00013592	0.00316752	0.00250067	g31361/g16514/g43384/g31343/g47083/g25933/g25789/g44493/g20020/g55231/g13700/g5038	12	U_EC
GO:0042546	cell wall biogenesis	7/1195	58/60364	0.000146097	0.00333227	0.00263074	g54659/g54657/g29104/g54377/g23481/g46451/g54376	7	U_EC
GO:0051641	cellular localization	8/1195	82/60364	0.0002252	0.00502946	0.00397063	g35324/g53292/g14800/g25933/g25789/g60914/g20020/g54958	8	U_EC
GO:0072657	protein localization to membrane	8/1195	83/60364	0.00024494	0.00535868	0.00423053	g26049/g17583/g16514/g43384/g31343/g47083/g44493/g55231	8	U_EC
GO:0051924	regulation of calcium ion transport	4/1195	17/60364	0.000296023	0.00634673	0.00501058	g51025/g4449/g24627/g58683	4	U_EC
GO:0030126	COPI vesicle coat	5/1195	31/60364	0.000333941	0.00688839	0.0054382	g60523/g46566/g45955/g34079/g38860	5	U_EC
GO:0006470	protein dephosphorylation	14/1195	239/60364	0.000334138	0.00688839	0.0054382	g35727/g54420/g59823/g60767/g4951/g50356/g13499/g54461/g49362/g34275/g12716/g59622/g42831/g4904	14	U_EC
GO:0000139	Golgi membrane	20/1195	422/60364	0.000349196	0.00706299	0.00557605	g25579/g59654/g61120/g22249/g15319/g16514/g60523/g54742/g43384/g31343/g14106/g47083/g46566/g45955/g34079/g44493/g29076/g55231/g23679/g38860	20	U_EC
GO:0016747	acyltransferase activity, transferring groups other than amino-acyl groups	20/1195	426/60364	0.000393558	0.00756728	0.00597417	g63628/g54875/g29224/g25665/g20600/g7933/g8434/g29269/g1049/g30405/g30407/g33892/g26813/g12852/g23918/g42023/g20800/g26783/g59024/g63249	20	U_EC
GO:0006890	retrograde vesicle-mediated transport, Golgi to endoplasmic reticulum	8/1195	89/60364	0.000395305	0.00756728	0.00597417	g30460/g60523/g46566/g45955/g13549/g34079/g9074/g38860	8	U_EC
GO:0006906	vesicle fusion	8/1195	89/60364	0.000395305	0.00756728	0.00597417	g33365/g58297/g53292/g13549/g61061/g25067/g50275/g14677	8	U_EC
GO:0006066	alcohol metabolic process	9/1195	112/60364	0.000403458	0.00758784	0.0059904	g36868/g39962/g26049/g17840/g13668/g59024/g30511/g27454/g53937	9	U_EC
GO:0016207	4-coumarate-CoA ligase activity	7/1195	69/60364	0.000434396	0.00802884	0.00633856	g34092/g27170/g5538/g55289/g51141/g54808/g4683	7	U_EC
GO:0017022	myosin binding	5/1195	33/60364	0.00045145	0.00820261	0.00647575	g51025/g4449/g29555/g17583/g58683	5	U_EC
GO:0005905	clathrin-coated pit	6/1195	52/60364	0.00055657	0.00986714	0.00778985	g39016/g46312/g21727/g14800/g62058/g3856	6	U_EC
GO:0004721	phosphoprotein phosphatase activity	12/1195	195/60364	0.00056147	0.00986714	0.00778985	g59823/g60767/g4951/g50356/g35826/g13499/g20371/g49362/g12716/g59622/g3849/g42831	12	U_EC
GO:0006888	endoplasmic reticulum to Golgi vesicle-mediated transport	12/1195	199/60364	0.000671779	0.0116153	0.00916995	g29755/g15319/g373/g60523/g34422/g23363/g46566/g34079/g31708/g539/g59820/g38860	12	U_EC
GO:0030054	cell junction	14/1195	257/60364	0.000686273	0.0116775	0.0092191	g26049/g10102/g17583/g35324/g29063/g25469/g14800/g4784/g61259/g60914/g30787/g31360/g5038/g14677	14	U_EC
GO:0000280	nuclear division	4/1195	21/60364	0.000698945	0.0117073	0.00924262	g21444/g25933/g25789/g20020	4	U_EC
GO:0030154	cell differentiation	20/1195	447/60364	0.000716216	0.0118121	0.00932531	g60046/g1019/g19448/g61042/g54978/g21444/g10024/g17371/g10102/g17583/g41950/g47637/g9859/g4784/g54808/g59772/g44467/g30787/g24052/g5038	20	U_EC
GO:0005828	kinetochore microtubule	3/1195	10/60364	0.000836864	0.0131276	0.0103639	g25933/g25789/g20020	3	U_EC
GO:0033177	proton-transporting two-sector ATPase complex, proton-transporting domain	3/1195	10/60364	0.000836864	0.0131276	0.0103639	g38594/g31435/g34035	3	U_EC
GO:0045927	positive regulation of growth	4/1195	22/60364	0.000840935	0.0131276	0.0103639	g23469/g40134/g40106/g25770	4	U_EC
GO:0043169	cation binding	9/1195	124/60364	0.000844967	0.0131276	0.0103639	g59823/g4951/g50356/g13499/g54461/g49362/g12716/g59622/g42831	9	U_EC
GO:0071555	cell wall organization	15/1195	294/60364	0.000878757	0.0134575	0.0106244	g54659/g54657/g29104/g54377/g23481/g3925/g30519/g22249/g3926/g60616/g19658/g1199/g46451/g60058/g54376	15	U_EC
GO:0007034	vacuolar transport	8/1195	102/60364	0.000980644	0.0145169	0.0114607	g31361/g47842/g25933/g25789/g30101/g44493/g61061/g20020	8	U_EC
GO:0031201	SNARE complex	7/1195	79/60364	0.000984362	0.0145169	0.0114607	g58297/g53292/g25469/g13549/g25067/g50275/g14677	7	U_EC
GO:0004707	MAP kinase activity	4/1195	23/60364	0.0010021	0.0145169	0.0114607	g30344/g10102/g4784/g30618	4	U_EC
GO:0048729	tissue morphogenesis	4/1195	23/60364	0.0010021	0.0145169	0.0114607	g60046/g58376/g42468/g17583	4	U_EC
GO:0000165	MAPK cascade	6/1195	59/60364	0.00109578	0.0156624	0.012365	g30344/g10102/g4784/g59458/g748/g30618	6	U_EC
GO:0047196	long-chain-alcohol O-fatty-acyltransferase activity	3/1195	11/60364	0.00113376	0.0159921	0.0126253	g30826/g30825/g30827	3	U_EC
GO:0045324	late endosome to vacuole transport	4/1195	24/60364	0.00118378	0.0164564	0.0129919	g31361/g25933/g25789/g20020	4	U_EC
GO:0030136	clathrin-coated vesicle	6/1195	60/60364	0.00119739	0.0164564	0.0129919	g31588/g39016/g21727/g62058/g7665/g39372	6	U_EC
GO:0072583	clathrin-dependent endocytosis	7/1195	82/60364	0.00122684	0.0166477	0.013143	g39016/g46312/g35324/g21727/g14800/g62058/g1857	7	U_EC
GO:0000149	SNARE binding	9/1195	134/60364	0.00145952	0.0195576	0.0154402	g39016/g58297/g53292/g21727/g13549/g62058/g25067/g50275/g14677	9	U_EC
GO:0042761	very long-chain fatty acid biosynthetic process	3/1195	12/60364	0.00148948	0.0197126	0.0155626	g25622/g29829/g4813	3	U_EC
GO:0030659	cytoplasmic vesicle membrane	8/1195	111/60364	0.00169106	0.0221075	0.0174533	g46312/g58768/g23363/g14800/g63282/g39372/g54958/g3856	8	U_EC
GO:0048278	vesicle docking	4/1195	27/60364	0.00186529	0.0237822	0.0187754	g58297/g25067/g50275/g14677	4	U_EC
GO:0070534	protein K63-linked ubiquitination	4/1195	27/60364	0.00186529	0.0237822	0.0187754	g50597/g11708/g54278/g43487	4	U_EC
GO:0015140	malate transmembrane transporter activity	3/1195	13/60364	0.0019079	0.0237822	0.0187754	g50614/g29833/g60230	3	U_EC
GO:0044390	ubiquitin-like protein conjugating enzyme binding	3/1195	13/60364	0.0019079	0.0237822	0.0187754	g46847/g59165/g46297	3	U_EC
GO:0009409	response to cold	6/1195	67/60364	0.00212411	0.0261729	0.0206628	g59746/g10024/g24360/g58913/g61319/g58844	6	U_EC
GO:0016197	endosomal transport	5/1195	47/60364	0.00232302	0.0282986	0.022341	g17583/g61215/g645/g61061/g24052	5	U_EC
GO:0007010	cytoskeleton organization	8/1195	117/60364	0.00235604	0.0283783	0.0224039	g61579/g42946/g34932/g45695/g41714/g50242/g55594/g20583	8	U_EC
GO:0051258	protein polymerization	3/1195	14/60364	0.00239263	0.0284989	0.0224991	g25933/g25789/g20020	3	U_EC
GO:0006839	mitochondrial transport	4/1195	29/60364	0.00244655	0.0288209	0.0227533	g50614/g29833/g60230/g5655	4	U_EC
GO:0008289	lipid binding	13/1195	267/60364	0.00282277	0.0328914	0.0259669	g24584/g24585/g34440/g4284/g13696/g59483/g4088/g50493/g16369/g23491/g54325/g30521/g19278	13	U_EC
GO:0006301	postreplication repair	3/1195	15/60364	0.00294698	0.0332544	0.0262535	g47842/g54278/g43487	3	U_EC
GO:0015116	sulfate transmembrane transporter activity	3/1195	15/60364	0.00294698	0.0332544	0.0262535	g50614/g29833/g60230	3	U_EC
GO:0030125	clathrin vesicle coat	3/1195	15/60364	0.00294698	0.0332544	0.0262535	g46312/g7665/g34336	3	U_EC
GO:0048193	Golgi vesicle transport	7/1195	96/60364	0.00303415	0.0338813	0.0267484	g30460/g23233/g25469/g14160/g45955/g34079/g9074	7	U_EC
GO:0030117	membrane coat	5/1195	51/60364	0.00333419	0.036848	0.0290905	g60523/g34079/g39372/g24052/g38860	5	U_EC
GO:0071763	nuclear membrane organization	3/1195	16/60364	0.00357399	0.0388136	0.0306423	g25933/g25789/g20020	3	U_EC
GO:0017018	myosin phosphatase activity	9/1195	153/60364	0.00358446	0.0388136	0.0306423	g59823/g4951/g50356/g35826/g13499/g49362/g12716/g59622/g42831	9	U_EC
GO:0001676	long-chain fatty acid metabolic process	5/1195	53/60364	0.00394348	0.0412126	0.0325362	g34092/g48365/g5538/g38282/g54808	5	U_EC
GO:0032050	clathrin heavy chain binding	4/1195	33/60364	0.00395979	0.0412126	0.0325362	g39016/g46312/g21727/g62058	4	U_EC
GO:0071806	protein transmembrane transport	4/1195	33/60364	0.00395979	0.0412126	0.0325362	g58768/g42829/g55886/g43465	4	U_EC
GO:0090158	endoplasmic reticulum membrane organization	4/1195	33/60364	0.00395979	0.0412126	0.0325362	g54117/g56530/g31341/g46355	4	U_EC
GO:0030276	clathrin binding	6/1195	76/60364	0.0040074	0.041307	0.0326108	g21727/g14800/g62058/g7665/g39372/g1857	6	U_EC
GO:0010324	membrane invagination	3/1195	17/60364	0.00427641	0.0432482	0.0341433	g23233/g25789/g20020	3	U_EC
GO:0061631	ubiquitin conjugating enzyme activity	3/1195	17/60364	0.00427641	0.0432482	0.0341433	g24688/g13482/g43487	3	U_EC
GO:0016791	phosphatase activity	12/1195	249/60364	0.00436173	0.0434537	0.0343056	g56819/g18081/g43348/g18089/g29829/g43560/g60767/g29514/g20371/g59652/g3849/g13700	12	U_EC
GO:0005545	1-phosphatidylinositol binding	4/1195	34/60364	0.00441834	0.0434537	0.0343056	g39016/g33365/g21727/g62058	4	U_EC
GO:0080135	regulation of cellular response to stress	4/1195	34/60364	0.00441834	0.0434537	0.0343056	g21444/g10102/g4784/g12716	4	U_EC
GO:0071705	nitrogen compound transport	7/1195	103/60364	0.00448165	0.0436757	0.0344809	g50614/g25578/g60230/g53706/g9708/g58471/g13700	7	U_EC
GO:0006914	autophagy	9/1195	161/60364	0.00499851	0.0482739	0.038111	g51025/g4449/g47842/g58683/g25933/g25789/g61061/g20020/g34439	9	U_EC
GO:0005819	spindle	8/1195	133/60364	0.00514738	0.0488318	0.0385514	g51025/g4449/g12705/g10024/g10066/g58683/g61218/g30787	8	U_EC
GO:0008610	lipid biosynthetic process	8/1195	133/60364	0.00514738	0.0488318	0.0385514	g25764/g20052/g20736/g26717/g43075/g51716/g20303/g54808	8	U_EC
GO:0010143	cutin biosynthetic process	8/1271	19/60364	2.32476e-09	2.50842e-06	2.08739e-06	g56819/g34092/g43348/g5538/g43560/g18089/g18081/g59664	8	L_EC
GO:0009698	phenylpropanoid metabolic process	12/1271	75/60364	5.56026e-08	2.99976e-05	2.49627e-05	g34092/g5538/g25246/g20584/g27170/g51141/g19518/g55289/g54808/g54983/g39320/g4683	12	L_EC
GO:0009873	ethylene-activated signaling pathway	18/1271	196/60364	2.2107e-07	7.95115e-05	6.61659e-05	g34127/g59147/g34543/g5499/g30808/g20630/g46272/g43231/g43232/g43233/g43234/g31279/g42323/g60072/g46237/g14886/g4488/g60949	18	L_EC
GO:0098552	side of membrane	11/1271	78/60364	7.40746e-07	0.000199816	0.000166278	g4104/g54155/g4284/g54220/g42093/g2267/g59483/g10666/g29841/g61253/g30398	11	L_EC
GO:0004722	protein serine/threonine phosphatase activity	17/1271	211/60364	2.9161e-06	0.000629294	0.00052367	g54461/g9933/g59622/g35826/g50356/g4951/g4904/g58961/g34275/g25586/g49362/g3854/g31111/g5556/g13499/g13531/g41111	17	L_EC
GO:0090447	glycerol-3-phosphate 2-O-acyltransferase activity	5/1271	15/60364	1.03428e-05	0.00165173	0.0013745	g56819/g43348/g43560/g18089/g18081	5	L_EC
GO:0043169	cation binding	12/1271	124/60364	1.31993e-05	0.00165173	0.0013745	g54461/g9933/g59622/g50356/g4951/g25586/g49362/g3854/g31111/g5556/g13499/g13531	12	L_EC
GO:0016207	4-coumarate-CoA ligase activity	9/1271	69/60364	1.44334e-05	0.00165173	0.0013745	g34092/g5538/g20584/g27170/g51141/g55289/g54808/g39320/g4683	9	L_EC
GO:0006470	protein dephosphorylation	17/1271	239/60364	1.51826e-05	0.00165173	0.0013745	g54461/g9933/g59622/g50356/g4951/g4904/g58961/g34275/g25586/g49362/g3854/g31111/g58895/g5556/g13499/g60767/g13531	17	L_EC
GO:0005516	calmodulin binding	18/1271	264/60364	1.5308e-05	0.00165173	0.0013745	g52724/g24788/g60387/g29049/g26745/g1093/g24869/g25701/g649/g59849/g16972/g49054/g25320/g38705/g217/g16769/g59494/g41670	18	L_EC
GO:0015250	water channel activity	7/1271	40/60364	1.83341e-05	0.00171063	0.00142351	g4732/g8733/g19675/g4812/g37613/g54953/g47776	7	L_EC
GO:0004721	phosphoprotein phosphatase activity	15/1271	195/60364	1.90246e-05	0.00171063	0.00142351	g9933/g59622/g35826/g50356/g4951/g25586/g20371/g49362/g3854/g31111/g58895/g5556/g13499/g60767/g13531	15	L_EC
GO:0017018	myosin phosphatase activity	13/1271	153/60364	2.37897e-05	0.00195937	0.0016305	g9933/g59622/g35826/g50356/g4951/g25586/g49362/g3854/g31111/g5556/g13499/g13531/g41111	13	L_EC
GO:0009734	auxin-activated signaling pathway	16/1271	224/60364	2.54228e-05	0.00195937	0.0016305	g5344/g12152/g26685/g13864/g20967/g47162/g8424/g13867/g13270/g13819/g51198/g13174/g62179/g24356/g13218/g59391	16	L_EC
GO:0032509	endosome transport via multivesicular body sorting pathway	5/1271	18/60364	2.79972e-05	0.00201394	0.00167591	g31361/g25789/g25933/g34439/g20020	5	L_EC
GO:0006833	water transport	5/1271	19/60364	3.73365e-05	0.00251788	0.00209527	g4732/g8733/g19675/g54953/g47776	5	L_EC
GO:0030497	fatty acid elongation	4/1271	12/60364	8.46006e-05	0.00536965	0.00446838	g306/g25622/g29829/g307	4	L_EC
GO:0030234	enzyme regulator activity	9/1271	91/60364	0.000132207	0.00792509	0.0065949	g31704/g58979/g53040/g51050/g60135/g17546/g51025/g58683/g25354	9	L_EC
GO:0032409	regulation of transporter activity	4/1271	14/60364	0.000165418	0.0089544	0.00745145	g24627/g42874/g51025/g58683	4	L_EC
GO:0004842	ubiquitin-protein transferase activity	23/1271	464/60364	0.000165976	0.0089544	0.00745145	g29743/g59972/g12012/g53723/g37622/g50526/g29668/g58284/g8953/g57577/g12698/g58790/g25066/g42380/g57652/g60848/g29300/g24688/g54450/g50426/g4341/g25402/g351	23	L_EC
GO:0009414	response to water deprivation	7/1271	57/60364	0.000190604	0.00941717	0.00783654	g19675/g24090/g50297/g54338/g53971/g49725/g59664	7	L_EC
GO:0005768	endosome	16/1271	266/60364	0.000192009	0.00941717	0.00783654	g46829/g31588/g47637/g31361/g25789/g25933/g20732/g34439/g20020/g7665/g29609/g7736/g43371/g29555/g34365/g14677	16	L_EC
GO:0042546	cell wall biogenesis	7/1271	58/60364	0.000212854	0.00986881	0.00821238	g54377/g54659/g54657/g29104/g54376/g20584/g30533	7	L_EC
GO:0006633	fatty acid biosynthetic process	18/1271	325/60364	0.00021951	0.00986881	0.00821238	g63628/g8434/g25665/g29224/g29269/g23525/g60068/g13381/g27170/g12852/g58720/g33892/g29829/g63249/g23509/g31299/g13494/g4683	18	L_EC
GO:0018105	peptidyl-serine phosphorylation	13/1271	194/60364	0.000265511	0.0114595	0.00953604	g10102/g4784/g12283/g19751/g24869/g25701/g59849/g16972/g8285/g25320/g217/g21444/g25821	13	L_EC
GO:0051924	regulation of calcium ion transport	4/1271	17/60364	0.000373968	0.0155197	0.0129148	g24627/g42874/g51025/g58683	4	L_EC
GO:0007166	cell surface receptor signaling pathway	17/1271	314/60364	0.00042028	0.0167957	0.0139766	g29963/g26214/g26291/g10102/g24456/g37622/g29401/g58790/g4784/g45962/g41823/g16970/g60848/g42454/g11938/g8848/g30178	17	L_EC
GO:0004467	long-chain fatty acid-CoA ligase activity	7/1271	66/60364	0.000476698	0.0177365	0.0147595	g34092/g5538/g20584/g51141/g54808/g39320/g4683	7	L_EC
GO:0035970	peptidyl-threonine dephosphorylation	7/1271	66/60364	0.000476698	0.0177365	0.0147595	g54461/g59622/g50356/g4951/g34275/g25586/g31111	7	L_EC
GO:0008610	lipid biosynthetic process	10/1271	133/60364	0.000540574	0.0189435	0.0157639	g25764/g20736/g47156/g4419/g20052/g26717/g54808/g51716/g43075/g42819	10	L_EC
GO:0000323	lytic vacuole	12/1271	183/60364	0.000547283	0.0189435	0.0157639	g23156/g16965/g25789/g25933/g35468/g31162/g20020/g5038/g43371/g51186/g373/g58768	12	L_EC
GO:0019199	transmembrane receptor protein kinase activity	4/1271	19/60364	0.000588945	0.0189435	0.0157639	g58779/g42454/g30178/g54746	4	L_EC
GO:0017022	myosin binding	5/1271	33/60364	0.000596921	0.0189435	0.0157639	g29529/g42874/g51025/g58683/g29555	5	L_EC
GO:0090158	endoplasmic reticulum membrane organization	5/1271	33/60364	0.000596921	0.0189435	0.0157639	g46355/g54117/g56530/g31341/g38297	5	L_EC
GO:0051050	positive regulation of transport	7/1271	71/60364	0.000743452	0.0224389	0.0186726	g47637/g24627/g25789/g42874/g51025/g20020/g58683	7	L_EC
GO:0000139	Golgi membrane	20/1271	422/60364	0.000748656	0.0224389	0.0186726	g59654/g61120/g1029/g20831/g29076/g54742/g53610/g14106/g44493/g25579/g31343/g15319/g22249/g47083/g55665/g43371/g47189/g34079/g43384/g55107	20	L_EC
GO:0000280	nuclear division	4/1271	21/60364	0.000879448	0.0256466	0.0213419	g25789/g25933/g20020/g21444	4	L_EC
GO:0015267	channel activity	7/1271	74/60364	0.000952817	0.0256997	0.0213861	g4732/g8733/g19675/g4812/g37613/g54953/g47776	7	L_EC
GO:0004470	malic enzyme activity	3/1271	10/60364	0.00100036	0.0256997	0.0213861	g31379/g25960/g9281	3	L_EC
GO:0004471	malate dehydrogenase (decarboxylating) (NAD+) activity	3/1271	10/60364	0.00100036	0.0256997	0.0213861	g31379/g25960/g9281	3	L_EC
GO:0005828	kinetochore microtubule	3/1271	10/60364	0.00100036	0.0256997	0.0213861	g25789/g25933/g20020	3	L_EC
GO:0006116	NADH oxidation	3/1271	10/60364	0.00100036	0.0256997	0.0213861	g46336/g42999/g46350	3	L_EC
GO:0045927	positive regulation of growth	4/1271	22/60364	0.00105705	0.0265246	0.0220726	g23469/g41713/g25770/g24319	4	L_EC
GO:0061817	endoplasmic reticulum-plasma membrane tethering	5/1271	38/60364	0.0011575	0.0283851	0.0236208	g16369/g46355/g54117/g56530/g38297	5	L_EC
GO:0000278	mitotic cell cycle	12/1271	200/60364	0.00118828	0.0284922	0.02371	g25789/g25933/g42874/g20583/g51025/g60556/g20020/g58683/g21444/g42946/g55594/g41111	12	L_EC
GO:0004707	MAP kinase activity	4/1271	23/60364	0.00125838	0.0295172	0.0245629	g10102/g4784/g30344/g30618	4	L_EC
GO:0016762	xyloglucan:xyloglucosyl transferase activity	5/1271	39/60364	0.00130492	0.0299575	0.0249293	g54377/g54659/g54657/g29104/g54376	5	L_EC
GO:0016050	vesicle organization	6/1271	58/60364	0.00137118	0.0308229	0.0256494	g25933/g21727/g15319/g55665/g373/g59749	6	L_EC
GO:0045324	late endosome to vacuole transport	4/1271	24/60364	0.00148505	0.0323604	0.0269289	g31361/g25789/g25933/g20020	4	L_EC
GO:0000165	MAPK cascade	6/1271	59/60364	0.00149956	0.0323604	0.0269289	g10102/g4784/g38163/g59458/g30344/g30618	6	L_EC
GO:0071555	cell wall organization	15/1271	294/60364	0.00160687	0.0339963	0.0282901	g54377/g54659/g1199/g4923/g54657/g29104/g54376/g60616/g19658/g30836/g30519/g37631/g4304/g22249/g708	15	L_EC
GO:0009617	response to bacterium	4/1271	25/60364	0.00173865	0.0354623	0.0295101	g10102/g42987/g4784/g58844	4	L_EC
GO:0051641	cellular localization	7/1271	82/60364	0.00174189	0.0354623	0.0295101	g53292/g25789/g25933/g59996/g35324/g20020/g59743	7	L_EC
GO:0042761	very long-chain fatty acid biosynthetic process	3/1271	12/60364	0.00177711	0.0355094	0.0295493	g306/g25622/g29829	3	L_EC
GO:0006796	phosphate-containing compound metabolic process	8/1271	106/60364	0.00185147	0.0363225	0.030226	g61078/g60000/g56005/g42874/g51025/g2575/g16577/g58683	8	L_EC
GO:0009931	calcium-dependent protein serine/threonine kinase activity	6/1271	62/60364	0.00193996	0.0373788	0.0311049	g24869/g25701/g59849/g16972/g25320/g217	6	L_EC
GO:0006665	sphingolipid metabolic process	5/1271	43/60364	0.0020358	0.0378728	0.031516	g58905/g25622/g43039/g35291/g51186	5	L_EC
GO:0010411	xyloglucan metabolic process	5/1271	43/60364	0.0020358	0.0378728	0.031516	g54377/g54659/g54657/g29104/g54376	5	L_EC
GO:0004683	calmodulin-dependent protein kinase activity	6/1271	63/60364	0.00210652	0.0385243	0.0320582	g24869/g25701/g59849/g16972/g25320/g217	6	L_EC
GO:0044042	glucan metabolic process	5/1271	44/60364	0.00225746	0.0394992	0.0328695	g54377/g54659/g54657/g29104/g54376	5	L_EC
GO:0015140	malate transmembrane transporter activity	3/1271	13/60364	0.0022742	0.0394992	0.0328695	g50614/g29833/g60230	3	L_EC
GO:0044390	ubiquitin-like protein conjugating enzyme binding	3/1271	13/60364	0.0022742	0.0394992	0.0328695	g46847/g59165/g46297	3	L_EC
GO:0012505	endomembrane system	14/1271	275/60364	0.00230626	0.0394992	0.0328695	g23156/g16369/g58297/g10102/g4784/g25067/g53610/g35468/g26717/g21727/g29609/g7736/g55107/g14677	14	L_EC
GO:0033365	protein localization to organelle	8/1271	112/60364	0.00261599	0.0434545	0.0361609	g25789/g25933/g42874/g51025/g43465/g20020/g30138/g58683	8	L_EC
GO:0016791	phosphatase activity	13/1271	249/60364	0.00261774	0.0434545	0.0361609	g56819/g43348/g59652/g43560/g18089/g13337/g18081/g29829/g20371/g43039/g58895/g60767/g29514	13	L_EC
GO:0032984	protein-containing complex disassembly	5/1271	46/60364	0.00275267	0.0450019	0.0374486	g25789/g25933/g20020/g5119/g30196	5	L_EC
GO:0031956	medium-chain fatty acid-CoA ligase activity	3/1271	14/60364	0.00284932	0.0450769	0.0375109	g20584/g55289/g4683	3	L_EC
GO:0051258	protein polymerization	3/1271	14/60364	0.00284932	0.0450769	0.0375109	g25789/g25933/g20020	3	L_EC
GO:0009409	response to cold	6/1271	67/60364	0.00288258	0.0450769	0.0375109	g59746/g10024/g61319/g58844/g50297/g24360	6	L_EC
GO:0006839	mitochondrial transport	4/1271	29/60364	0.00305401	0.0470754	0.039174	g50614/g29833/g60230/g5655	4	L_EC
GO:0006833	water transport	6/115	19/60364	1.11376e-12	2.09387e-10	1.26617e-10	g54953/g4732/g19675/g47776/g61049/g58060	6	VC
GO:0015250	water channel activity	6/115	40/60364	1.52523e-10	1.43372e-08	8.66973e-09	g54953/g4732/g19675/g47776/g61049/g58060	6	VC
GO:0015267	channel activity	6/115	74/60364	6.98384e-09	4.37654e-07	2.64651e-07	g54953/g4732/g19675/g47776/g61049/g58060	6	VC
GO:0016762	xyloglucan:xyloglucosyl transferase activity	3/115	39/60364	5.85498e-05	0.0026402	0.00159654	g54376/g54659/g54377	3	VC
GO:0010411	xyloglucan metabolic process	3/115	43/60364	7.86258e-05	0.0026402	0.00159654	g54376/g54659/g54377	3	VC
GO:0044042	glucan metabolic process	3/115	44/60364	8.42618e-05	0.0026402	0.00159654	g54376/g54659/g54377	3	VC
GO:0098869	cellular oxidant detoxification	5/115	267/60364	0.000168337	0.00402191	0.00243206	g20857/g803/g59329/g38015/g50412	5	VC
GO:0009414	response to water deprivation	3/115	57/60364	0.000182833	0.00402191	0.00243206	g24090/g19675/g405	3	VC
GO:0042546	cell wall biogenesis	3/115	58/60364	0.000192538	0.00402191	0.00243206	g54376/g54659/g54377	3	VC
GO:0006979	response to oxidative stress	5/115	297/60364	0.000275065	0.00517123	0.00312706	g20857/g803/g58913/g59329/g38015	5	VC
GO:0008725	DNA-3-methyladenine glycosylase activity	2/115	16/60364	0.000424277	0.00709395	0.00428974	g39206/g18764	2	VC
GO:0042744	hydrogen peroxide catabolic process	4/115	185/60364	0.000452806	0.00709395	0.00428974	g20857/g803/g59329/g38015	4	VC
GO:0000226	microtubule cytoskeleton organization	4/115	194/60364	0.000541242	0.0078272	0.00473313	g34378/g55594/g60556/g60270	4	VC
GO:0000278	mitotic cell cycle	4/115	200/60364	0.000606615	0.00814597	0.0049259	g34378/g55594/g60556/g60270	4	VC
GO:0004601	peroxidase activity	4/115	251/60364	0.00140578	0.0176191	0.0106543	g20857/g803/g59329/g38015	4	VC
GO:0051289	protein homotetramerization	2/115	31/60364	0.00161365	0.0189604	0.0114654	g7923/g58060	2	VC
GO:0005200	structural constituent of cytoskeleton	2/115	33/60364	0.00182773	0.0202125	0.0122226	g60556/g60270	2	VC
GO:0009505	plant-type cell wall	3/115	133/60364	0.00215627	0.022521	0.0136185	g20857/g803/g59329	3	VC
GO:0016717	oxidoreductase activity, acting on paired donors, with oxidation of a pair of donors resulting in the reduction of molecular oxygen to two molecules of water	2/115	44/60364	0.00323023	0.0317371	0.0191915	g58380/g5007	2	VC
GO:0009908	flower development	2/115	45/60364	0.00337628	0.0317371	0.0191915	g13299/g58844	2	VC
GO:0006730	one-carbon metabolic process	2/115	51/60364	0.004316	0.0386385	0.0233648	g7923/g7921	2	VC
GO:0140825	lactoperoxidase activity	3/115	177/60364	0.00481117	0.0408859	0.0247239	g20857/g803/g59329	3	VC
GO:0007017	microtubule-based process	2/115	55/60364	0.005002	0.0408859	0.0247239	g60556/g60270	2	VC
GO:0009873	ethylene-activated signaling pathway	3/115	196/60364	0.00637532	0.04994	0.0301989	g34127/g5103/g59682	3	VC
GO:0005743	mitochondrial inner membrane	47/2242	279/60364	4.69e-18	7.63063e-15	5.93409e-15	g23677/g45120/g23446/g17271/g34479/g30191/g4344/g39766/g46350/g60530/g10466/g50614/g841/g63395/g50874/g61512/g21485/g4352/g48041/g30169/g17154/g9877/g12522/g31439/g25915/g46717/g11474/g6479/g22580/g13661/g29109/g26747/g46629/g40225/g7428/g38032/g42727/g48337/g24695/g64127/g53220/g49828/g50768/g1341/g42501/g25421/g1033	47	GC
GO:0070469	respirasome	19/2242	54/60364	3.30027e-14	2.68477e-11	2.08786e-11	g60700/g39766/g46494/g841/g63395/g5757/g61512/g9877/g22580/g13661/g46629/g40225/g42727/g48337/g24695/g49828/g50768/g25421/g1033	19	GC
GO:0005747	mitochondrial respiratory chain complex I	18/2242	54/60364	4.57628e-13	2.22054e-10	1.72684e-10	g58774/g841/g61512/g173/g62637/g22580/g988/g20730/g40225/g38032/g13566/g42727/g24695/g49828/g50768/g26574/g25421/g1033	18	GC
GO:0003924	GTPase activity	53/2242	462/60364	5.58504e-13	2.22054e-10	1.72684e-10	g46829/g15319/g9068/g55665/g29897/g44374/g24223/g30657/g40877/g30460/g4508/g7940/g47018/g38689/g16217/g50550/g53713/g29609/g30448/g11767/g41669/g7296/g42682/g44425/g30188/g43371/g4818/g46506/g23363/g25408/g14636/g25643/g2425/g53566/g59541/g13769/g59382/g59742/g61061/g31341/g49911/g54252/g34953/g17583/g34552/g60772/g9451/g34965/g59743/g23233/g34365/g29416/g11951	53	GC
GO:1902600	proton transmembrane transport	35/2242	223/60364	6.82403e-13	2.22054e-10	1.72684e-10	g16687/g60914/g39766/g23761/g60097/g8941/g60531/g60776/g39172/g25923/g42829/g48041/g54958/g49923/g12522/g38594/g30966/g54257/g19596/g30101/g13661/g7428/g32037/g31435/g43718/g26298/g58768/g63942/g39341/g63282/g59779/g31260/g53220/g6295/g41739	35	GC
GO:0046961	proton-transporting ATPase activity, rotational mechanism	19/2242	66/60364	2.03068e-12	5.50652e-10	4.28224e-10	g60914/g60531/g42829/g54958/g49923/g12522/g38594/g30966/g19596/g30101/g7428/g31435/g43718/g58768/g39341/g63282/g59779/g6295/g41739	19	GC
GO:0033365	protein localization to organelle	24/2242	112/60364	3.085e-12	7.17041e-10	5.57619e-10	g29897/g42874/g24687/g24223/g25789/g4449/g55886/g20020/g58358/g55870/g3454/g46449/g43465/g51025/g37628/g25727/g38272/g25933/g49911/g17583/g6392/g37017/g34380/g58683	24	GC
GO:0045551	cinnamyl-alcohol dehydrogenase activity	14/2242	34/60364	6.31683e-12	1.28469e-09	9.99056e-10	g29793/g29794/g29790/g29798/g29788/g549/g29796/g29801/g29786/g29787/g29779/g36868/g39962/g29785	14	GC
GO:0005768	endosome	36/2242	266/60364	2.70499e-11	4.89003e-09	3.80281e-09	g46829/g20732/g30657/g60776/g10012/g25789/g7665/g13935/g47018/g31361/g14677/g29609/g42682/g30188/g34439/g59771/g58138/g20020/g43371/g4818/g20154/g56818/g47637/g13769/g25933/g25097/g54252/g3417/g21469/g61523/g54954/g9705/g42679/g23233/g34365/g11951	36	GC
GO:0006099	tricarboxylic acid cycle	22/2242	105/60364	3.9136e-11	6.36742e-09	4.95173e-09	g54599/g30191/g9001/g25644/g16865/g61191/g63871/g30935/g26158/g59975/g13124/g54704/g46717/g43333/g29486/g9464/g17152/g4152/g43493/g1341/g5274/g38670	22	GC
GO:0009809	lignin biosynthetic process	14/2242	41/60364	1.25223e-10	1.85216e-08	1.44036e-08	g29793/g29794/g29790/g29798/g29788/g549/g29796/g29801/g29786/g29787/g29779/g36868/g39962/g29785	14	GC
GO:0000139	Golgi membrane	43/2242	422/60364	3.29249e-09	4.46407e-07	3.47156e-07	g20831/g15319/g55665/g37768/g13665/g54039/g37807/g29897/g44493/g30657/g941/g55107/g53610/g14605/g42801/g34726/g30188/g52259/g14106/g43371/g30055/g47083/g41796/g54742/g54708/g47189/g1029/g43384/g38272/g59654/g50759/g24648/g45955/g60523/g41744/g31285/g31343/g51334/g34343/g26452/g61187/g16514/g23679	43	GC
GO:0012505	endomembrane system	33/2242	275/60364	4.01977e-09	5.0309e-07	3.91236e-07	g58497/g16369/g60914/g26717/g5471/g11498/g67/g60097/g24223/g41721/g54834/g55107/g21727/g53610/g14677/g29609/g29900/g54958/g42682/g30188/g42862/g58297/g58668/g25067/g43718/g14662/g61223/g25940/g63282/g31285/g21286/g17583/g20571	33	GC
GO:0030234	enzyme regulator activity	18/2242	91/60364	6.02975e-09	7.00743e-07	5.44944e-07	g58979/g13848/g13241/g24687/g31704/g51050/g53040/g17154/g29109/g61288/g51025/g25995/g58683/g6593/g1485/g25354/g1483/g20666	18	GC
GO:0035970	peptidyl-threonine dephosphorylation	15/2242	66/60364	1.51287e-08	1.64096e-06	1.27612e-06	g34275/g54461/g30851/g50356/g38/g46692/g31111/g59823/g33397/g59622/g35736/g29432/g12597/g54896/g42831	15	GC
GO:0005777	peroxisome	27/2242	212/60364	2.87325e-08	2.92173e-06	2.27213e-06	g58412/g26200/g23677/g4405/g34479/g29608/g58491/g46350/g25984/g5212/g46336/g26746/g1820/g55871/g20151/g23950/g6479/g54840/g14019/g59541/g17152/g9867/g54581/g55653/g54804/g38282/g64	27	GC
GO:0006108	malate metabolic process	9/2242	24/60364	1.04319e-07	9.98393e-06	7.76416e-06	g62884/g62786/g25960/g59975/g13124/g9464/g17152/g43493/g30367	9	GC
GO:0032509	endosome transport via multivesicular body sorting pathway	8/2242	18/60364	1.12118e-07	1.01342e-05	7.88105e-06	g25789/g31361/g63857/g34439/g20020/g25933/g47842/g9705	8	GC
GO:0016616	oxidoreductase activity, acting on the CH-OH group of donors, NAD or NADP as acceptor	39/2242	413/60364	1.31727e-07	1.128e-05	8.77204e-06	g54782/g29793/g29794/g29790/g29798/g30051/g29788/g549/g19288/g24330/g24724/g55949/g29796/g29801/g24546/g34401/g29786/g16865/g29787/g63871/g29779/g58580/g36868/g59975/g42999/g13124/g39962/g29785/g6479/g307/g29486/g27454/g17152/g4362/g8888/g59685/g31063/g4152/g43493	39	GC
GO:0046933	proton-transporting ATP synthase activity, rotational mechanism	11/2242	40/60364	1.54678e-07	1.2583e-05	9.78541e-06	g60914/g8941/g25923/g42829/g48041/g12522/g3966/g7428/g32037/g58768/g53220	11	GC
GO:0007034	vacuolar transport	17/2242	102/60364	2.19722e-07	1.70233e-05	1.32384e-05	g11498/g44493/g25789/g31361/g63857/g58138/g20020/g20154/g30101/g59742/g61061/g25933/g34953/g47842/g11941/g54954/g9705	17	GC
GO:0032409	regulation of transporter activity	7/2242	14/60364	2.63425e-07	1.86345e-05	1.44914e-05	g42874/g24687/g24627/g4449/g51025/g34255/g58683	7	GC
GO:0051224	negative regulation of protein transport	7/2242	14/60364	2.63425e-07	1.86345e-05	1.44914e-05	g25626/g59326/g43184/g42480/g34255/g58058/g221	7	GC
GO:0004722	protein serine/threonine phosphatase activity	25/2242	211/60364	3.72931e-07	2.40107e-05	1.86723e-05	g58961/g34275/g54461/g4904/g30851/g50356/g35826/g5556/g3854/g38/g46692/g41795/g31111/g59823/g33397/g59622/g26392/g49741/g35736/g47187/g38336/g29432/g12597/g54896/g42831	25	GC
GO:0004842	ubiquitin-protein transferase activity	41/2242	464/60364	3.76704e-07	2.40107e-05	1.86723e-05	g4515/g9050/g18925/g50426/g37622/g25066/g46387/g15993/g42597/g25402/g38006/g30104/g24688/g59972/g60848/g9387/g58284/g25442/g57577/g4533/g23452/g39121/g29743/g33860/g54278/g31267/g57652/g351/g60942/g4341/g35346/g42478/g58790/g35815/g42380/g43168/g51058/g14080/g53383/g60755/g38974	41	GC
GO:0004864	protein phosphatase inhibitor activity	10/2242	35/60364	3.83699e-07	2.40107e-05	1.86723e-05	g24506/g25480/g20407/g39321/g12068/g21431/g55788/g9351/g19566/g993	10	GC
GO:0006888	endoplasmic reticulum to Golgi vesicle-mediated transport	24/2242	199/60364	4.5671e-07	2.7521e-05	2.14021e-05	g29755/g15319/g55665/g59749/g30948/g30657/g42786/g41669/g38222/g13686/g373/g43371/g23363/g20911/g14150/g50759/g60523/g41744/g31285/g6392/g9042/g30336/g9451/g43458	24	GC
GO:0031625	ubiquitin protein ligase binding	20/2242	145/60364	4.76502e-07	2.76882e-05	2.15322e-05	g8728/g9387/g63857/g55886/g55870/g3454/g54278/g42420/g351/g25727/g25995/g49743/g59863/g45829/g43168/g1315/g47842/g6593/g221/g14080	20	GC
GO:0015078	proton transmembrane transporter activity	10/2242	36/60364	5.13545e-07	2.88116e-05	2.24058e-05	g60531/g25923/g48041/g38594/g31435/g43718/g59779/g53220/g6295/g41739	10	GC
GO:0003743	translation initiation factor activity	26/2242	231/60364	5.99931e-07	3.25362e-05	2.53023e-05	g360/g58778/g25923/g55847/g18478/g47131/g34484/g34714/g31571/g8704/g58452/g42993/g46393/g26057/g43735/g30459/g59800/g26056/g35081/g60772/g61143/g55953/g1485/g60895/g29915/g1483	26	GC
GO:0008378	galactosyltransferase activity	10/2242	37/60364	6.80268e-07	3.57031e-05	2.77651e-05	g37768/g54039/g37807/g941/g53610/g42801/g54742/g54708/g1029/g61187	10	GC
GO:0006413	translational initiation	26/2242	233/60364	7.08218e-07	3.60084e-05	2.80026e-05	g360/g58778/g25923/g55847/g18478/g47131/g34484/g34714/g31571/g8704/g58452/g42993/g46393/g26057/g43735/g30459/g59800/g26056/g35081/g60772/g61143/g55953/g1485/g60895/g29915/g1483	26	GC
GO:2000031	regulation of salicylic acid mediated signaling pathway	7/2242	16/60364	8.22322e-07	4.05429e-05	3.15289e-05	g34703/g50259/g28022/g36877/g59006/g7746/g46268	7	GC
GO:0019904	protein domain specific binding	20/2242	152/60364	1.021e-06	4.88579e-05	3.79952e-05	g38168/g42874/g24687/g25789/g4449/g63857/g14605/g20020/g3454/g46449/g61288/g51025/g29049/g25727/g49911/g914/g58683/g47842/g200/g9705	20	GC
GO:0016050	vesicle organization	12/2242	58/60364	1.21974e-06	5.67005e-05	4.4094e-05	g15319/g60914/g55665/g59749/g21727/g41669/g373/g23363/g13769/g25933/g9451/g11941	12	GC
GO:0009695	jasmonic acid biosynthetic process	7/2242	17/60364	1.35287e-06	5.94896e-05	4.62631e-05	g58412/g26200/g29282/g29235/g38656/g29259/g60443	7	GC
GO:0051924	regulation of calcium ion transport	7/2242	17/60364	1.35287e-06	5.94896e-05	4.62631e-05	g42874/g24687/g24627/g4449/g51025/g34255/g58683	7	GC
GO:0004364	glutathione transferase activity	17/2242	116/60364	1.4328e-06	6.13465e-05	4.77071e-05	g5455/g20967/g20968/g24353/g24348/g30582/g5453/g60809/g36781/g12152/g24347/g42391/g24349/g5038/g30581/g24356/g24343	17	GC
GO:0031982	vesicle	17/2242	117/60364	1.61869e-06	6.75282e-05	5.25144e-05	g67/g42874/g24687/g60033/g9732/g1857/g4449/g5119/g25469/g1856/g47189/g51025/g41890/g60203/g2882/g5246/g58683	17	GC
GO:0051050	positive regulation of transport	13/2242	71/60364	1.92036e-06	7.81105e-05	6.07439e-05	g42874/g24687/g24627/g25789/g4449/g30188/g20020/g47637/g51025/g61061/g58683/g23233/g11951	13	GC
GO:0000221	vacuolar proton-transporting V-type ATPase, V1 domain	7/2242	18/60364	2.14244e-06	8.10638e-05	6.30406e-05	g60914/g54958/g30966/g43718/g58768/g63282/g6295	7	GC
GO:0005750	mitochondrial respiratory chain complex III	7/2242	18/60364	2.14244e-06	8.10638e-05	6.30406e-05	g39766/g63395/g9877/g31439/g13661/g46629/g48337	7	GC
GO:0006122	mitochondrial electron transport, ubiquinol to cytochrome c	7/2242	18/60364	2.14244e-06	8.10638e-05	6.30406e-05	g39766/g63395/g9877/g31439/g13661/g46629/g48337	7	GC
GO:0010143	cutin biosynthetic process	7/2242	19/60364	3.28292e-06	0.000121394	9.44037e-05	g34092/g18089/g56819/g59664/g18081/g5538/g43348	7	GC
GO:0033180	proton-transporting V-type ATPase, V1 domain	6/2242	13/60364	3.57246e-06	0.000126175	9.81221e-05	g60914/g42829/g49923/g43718/g58768/g6295	6	GC
GO:0030659	cytoplasmic vesicle membrane	16/2242	111/60364	3.61198e-06	0.000126175	9.81221e-05	g46312/g11498/g41721/g41669/g25502/g54958/g23363/g3856/g19665/g43718/g38272/g58768/g63282/g20359/g34953/g21469	16	GC
GO:0031072	heat shock protein binding	13/2242	75/60364	3.64489e-06	0.000126175	9.81221e-05	g3669/g48462/g58896/g10024/g48148/g34361/g55886/g55870/g3454/g9126/g34218/g25727/g17853	13	GC
GO:0044238	primary metabolic process	32/2242	353/60364	4.00548e-06	0.000135725	0.000105549	g24330/g24724/g55079/g25644/g42874/g24687/g60259/g20818/g4508/g58580/g4449/g53610/g21485/g42801/g17371/g16577/g10196/g9343/g56140/g61288/g51025/g60000/g914/g4342/g46322/g60065/g5505/g61078/g25972/g58683/g7923/g9243	32	GC
GO:0006096	glycolytic process	17/2242	125/60364	4.08761e-06	0.000135725	0.000105549	g45357/g67/g58139/g16788/g40628/g60033/g25618/g21456/g41721/g25942/g25614/g4433/g61/g7510/g12602/g11707/g45144	17	GC
GO:0000502	proteasome complex	17/2242	128/60364	5.66439e-06	0.000184319	0.000143339	g59809/g9880/g63857/g42784/g38669/g28080/g4478/g16151/g25995/g20351/g38386/g16513/g47842/g6593/g40432/g5233/g55146	17	GC
GO:0031410	cytoplasmic vesicle	27/2242	277/60364	5.88469e-06	0.000187733	0.000145994	g15319/g55665/g59214/g59749/g46312/g9008/g10012/g7665/g21727/g53713/g25502/g34726/g3856/g47189/g59541/g14150/g45955/g60523/g41744/g20359/g51334/g9042/g21469/g46329/g24052/g29416/g50215	27	GC
GO:0051085	chaperone cofactor-dependent protein refolding	14/2242	91/60364	6.67398e-06	0.000208819	0.000162391	g3669/g48462/g10024/g48148/g34361/g55886/g55870/g34218/g31558/g17853/g30799/g42726/g18866/g12571	14	GC
GO:0005516	calmodulin binding	26/2242	264/60364	7.21244e-06	0.000221408	0.000172182	g1093/g41670/g28911/g54206/g26745/g59849/g9732/g54966/g53874/g58509/g26743/g34428/g24788/g59494/g24869/g36405/g3472/g29049/g2882/g16769/g5246/g58552/g53692/g41910/g217/g649	26	GC
GO:0098869	cellular oxidant detoxification	26/2242	267/60364	8.82689e-06	0.000265951	0.000206821	g17013/g54685/g38169/g38168/g21289/g24553/g24561/g24556/g41697/g24558/g13498/g31518/g25984/g28562/g48088/g34467/g28563/g59/g1820/g23950/g48090/g13387/g38344/g50412/g34471/g30139	26	GC
GO:0030042	actin filament depolymerization	6/2242	15/60364	9.77173e-06	0.000289065	0.000224796	g5296/g10039/g42852/g55960/g25641/g8294	6	GC
GO:0031966	mitochondrial membrane	10/2242	49/60364	1.06901e-05	0.000310585	0.000241532	g25644/g55669/g29833/g173/g5655/g988/g13566/g17023/g64127/g5505	10	GC
GO:0030134	COPII-coated ER to Golgi transport vesicle	11/2242	61/60364	1.36622e-05	0.000389971	0.000303267	g54063/g42786/g41669/g38222/g13686/g23363/g20911/g38272/g50759/g43458/g34280	11	GC
GO:0019003	GDP binding	7/2242	23/60364	1.40146e-05	0.000393134	0.000305727	g24223/g30657/g43371/g4818/g13769/g34953/g17583	7	GC
GO:0033177	proton-transporting two-sector ATPase complex, proton-transporting domain	5/2242	10/60364	1.51644e-05	0.000418177	0.000325202	g60531/g38594/g31435/g59779/g41739	5	GC
GO:0010008	endosome membrane	19/2242	167/60364	1.60605e-05	0.000429792	0.000334235	g59214/g55079/g44493/g25789/g31361/g3303/g20020/g47083/g56818/g5038/g43384/g61223/g25933/g31343/g34343/g26452/g54954/g16514/g42679	19	GC
GO:0005774	vacuolar membrane	23/2242	228/60364	1.61139e-05	0.000429792	0.000334235	g60914/g11498/g60531/g25789/g14677/g54958/g373/g38594/g20020/g54257/g31435/g59742/g61061/g5038/g58768/g25933/g63942/g63282/g59779/g31260/g29873/g41739/g9705	23	GC
GO:0005681	spliceosomal complex	28/2242	310/60364	1.66285e-05	0.000436364	0.000339345	g59746/g9636/g54430/g53950/g24693/g46863/g40165/g34722/g19789/g5010/g4975/g11884/g8704/g55076/g722/g59582/g30705/g12408/g13856/g58132/g17051/g8711/g49767/g20788/g51089/g58190/g26714/g20789	28	GC
GO:0000323	lytic vacuole	20/2242	183/60364	1.76561e-05	0.000455976	0.000354597	g60914/g11498/g9008/g60033/g30657/g25789/g60759/g54958/g373/g20020/g43371/g59742/g61061/g43718/g5038/g58768/g25933/g63282/g767/g9705	20	GC
GO:0017022	myosin binding	8/2242	33/60364	2.16185e-05	0.000549582	0.000427391	g41427/g42874/g24687/g24223/g4449/g51025/g17583/g58683	8	GC
GO:0030276	clathrin binding	12/2242	76/60364	2.28947e-05	0.000573073	0.000445659	g20732/g10012/g41721/g7665/g1857/g21727/g5119/g1856/g19665/g21469/g11941/g50215	12	GC
GO:0006906	vesicle fusion	13/2242	89/60364	2.50005e-05	0.0006163	0.000479276	g54847/g59996/g14677/g53292/g4818/g58297/g58668/g25067/g59742/g61061/g61223/g24648/g3417	13	GC
GO:0010427	abscisic acid binding	7/2242	25/60364	2.57431e-05	0.000625136	0.000486147	g24506/g25480/g20407/g39321/g12068/g55788/g19566	7	GC
GO:0051246	regulation of protein metabolic process	9/2242	44/60364	2.8906e-05	0.000691618	0.000537848	g42874/g24687/g4449/g42420/g51025/g60203/g17151/g58683/g20666	9	GC
GO:0006470	protein dephosphorylation	23/2242	239/60364	3.41048e-05	0.000804181	0.000625384	g58961/g34275/g54461/g4904/g30851/g58895/g50356/g5556/g3854/g38/g46692/g41795/g31111/g59823/g33397/g59622/g26392/g35736/g38336/g29432/g60767/g54896/g42831	23	GC
GO:0006511	ubiquitin-dependent protein catabolic process	36/2242	466/60364	3.5599e-05	0.000827422	0.000643458	g59809/g42836/g5104/g48359/g24688/g25789/g46297/g1236/g9387/g25626/g26394/g31181/g25602/g17091/g42784/g20020/g13482/g55655/g20828/g54744/g3665/g59777/g5038/g58848/g25933/g49743/g9329/g38386/g50004/g43168/g1315/g14080/g60755/g9705/g55146/g9248	36	GC
GO:0006897	endocytosis	21/2242	210/60364	4.19445e-05	0.000949474	0.000738374	g20732/g54847/g10012/g7665/g21727/g53713/g645/g34336/g13769/g59742/g61061/g55211/g63282/g9704/g34953/g19751/g49497/g21469/g61035/g50215/g18649	21	GC
GO:0015986	proton motive force-driven ATP synthesis	9/2242	46/60364	4.20173e-05	0.000949474	0.000738374	g60914/g8941/g25923/g48041/g12522/g3966/g7428/g32037/g53220	9	GC
GO:0009738	abscisic acid-activated signaling pathway	10/2242	57/60364	4.28842e-05	0.000955788	0.000743284	g24506/g25480/g20407/g31621/g39321/g12068/g21431/g55788/g34519/g19566	10	GC
GO:0032981	mitochondrial respiratory chain complex I assembly	8/2242	37/60364	5.26693e-05	0.00115801	0.000900548	g841/g62637/g22580/g38032/g24963/g49828/g25421/g1033	8	GC
GO:0048193	Golgi vesicle transport	13/2242	96/60364	5.64375e-05	0.00122432	0.00095211	g29897/g30460/g34726/g25469/g4818/g24648/g45955/g60364/g51334/g14160/g23233/g11951/g9243	13	GC
GO:0008320	protein transmembrane transporter activity	8/2242	38/60364	6.45478e-05	0.00138183	0.00107461	g19795/g31324/g34340/g43465/g37628/g55206/g25248/g24963	8	GC
GO:0019320	hexose catabolic process	5/2242	13/60364	7.05271e-05	0.00149023	0.0011589	g19538/g39300/g60033/g35077/g39116	5	GC
GO:0006839	mitochondrial transport	7/2242	29/60364	7.3372e-05	0.00153047	0.00119019	g50614/g29833/g50874/g5655/g11474/g14019/g5505	7	GC
GO:0050896	response to stimulus	31/2242	391/60364	7.45988e-05	0.00153636	0.00119477	g8296/g59238/g59947/g47205/g38155/g7087/g47209/g11498/g6980/g9008/g61053/g230/g26432/g34010/g44493/g25987/g25970/g13858/g4640/g60482/g54744/g3299/g20064/g60253/g5088/g59777/g5081/g37674/g20093/g31343/g34343	31	GC
GO:0006950	response to stress	12/2242	86/60364	8.02015e-05	0.0016311	0.00126845	g806/g33878/g54281/g26031/g20612/g29900/g59326/g16692/g35606/g50297/g45829/g26970	12	GC
GO:0006749	glutathione metabolic process	13/2242	100/60364	8.66806e-05	0.0017348	0.00134909	g5455/g20967/g20968/g24353/g24348/g38168/g5453/g12152/g13387/g24347/g24349/g24356/g24343	13	GC
GO:0005471	ATP:ADP antiporter activity	6/2242	21/60364	8.74328e-05	0.0017348	0.00134909	g23677/g38155/g50874/g4352/g25915/g11474	6	GC
GO:0003978	UDP-glucose 4-epimerase activity	7/2242	30/60364	9.26393e-05	0.00181595	0.00141221	g19538/g39300/g42526/g35077/g39116/g34168/g59624	7	GC
GO:0000398	mRNA splicing, via spliceosome	29/2242	360/60364	9.48788e-05	0.0018171	0.00141309	g9636/g54430/g53950/g46863/g40165/g34722/g19789/g10196/g12823/g25670/g5010/g60080/g38065/g30578/g11884/g56140/g34118/g8704/g55076/g13856/g23762/g58132/g17051/g37410/g49767/g11487/g51089/g58190/g26714	29	GC
GO:0000281	mitotic cytokinesis	8/2242	40/60364	9.50252e-05	0.0018171	0.00141309	g25789/g20020/g43021/g25933/g24981/g9705/g23233/g11951	8	GC
GO:0043130	ubiquitin binding	17/2242	159/60364	9.60481e-05	0.0018171	0.00141309	g20732/g41815/g49504/g31495/g1862/g59771/g58138/g63124/g54278/g30963/g15891/g431/g49743/g59363/g46322/g43298/g4627	17	GC
GO:0045454	cell redox homeostasis	9/2242	51/60364	9.81982e-05	0.00183642	0.00142812	g59663/g38168/g38850/g25984/g25907/g1820/g13387/g58708/g17472	9	GC
GO:0009698	phenylpropanoid metabolic process	11/2242	75/60364	9.9513e-05	0.00183986	0.0014308	g19518/g39320/g63872/g34092/g20584/g55289/g12718/g5538/g54808/g4683/g27170	11	GC
GO:0007029	endoplasmic reticulum organization	7/2242	31/60364	0.000115831	0.00210503	0.00163701	g63857/g58358/g43465/g37628/g37017/g34380/g47842	7	GC
GO:0045927	positive regulation of growth	6/2242	22/60364	0.000116443	0.00210503	0.00163701	g23469/g41713/g13782/g40106/g40134/g24319	6	GC
GO:0034605	cellular response to heat	12/2242	91/60364	0.000139567	0.00249533	0.00194053	g54532/g45094/g34696/g46038/g20607/g12687/g63857/g7919/g61288/g60203/g47842/g37631	12	GC
GO:0010181	FMN binding	11/2242	78/60364	0.00014277	0.00252486	0.0019635	g58412/g26200/g50545/g42024/g46388/g26717/g50543/g60238/g17063/g40225/g26957	11	GC
GO:0033179	proton-transporting V-type ATPase, V0 domain	6/2242	23/60364	0.000152594	0.00262069	0.00203802	g60531/g38594/g30101/g31435/g59779/g41739	6	GC
GO:0006301	postreplication repair	5/2242	15/60364	0.000154632	0.00262069	0.00203802	g63857/g4533/g54278/g43487/g47842	5	GC
GO:0016615	malate dehydrogenase activity	5/2242	15/60364	0.000154632	0.00262069	0.00203802	g59975/g13124/g29486/g17152/g43493	5	GC
GO:0046034	ATP metabolic process	5/2242	15/60364	0.000154632	0.00262069	0.00203802	g60914/g42829/g12522/g7428/g58768	5	GC
GO:0007030	Golgi organization	13/2242	106/60364	0.000157962	0.00264953	0.00206045	g15319/g55665/g30657/g42786/g30188/g13686/g43371/g30963/g13730/g38272/g49911/g59363/g30336	13	GC
GO:0031201	SNARE complex	11/2242	79/60364	0.000160347	0.0026621	0.00207022	g59996/g14677/g53292/g25469/g58297/g58668/g25067/g61223/g24648/g31285/g3417	11	GC
GO:0009409	response to cold	10/2242	67/60364	0.000175935	0.00284072	0.00220913	g59746/g53892/g10024/g61319/g58913/g54430/g61288/g50297/g29439/g29404	10	GC
GO:0030150	protein import into mitochondrial matrix	7/2242	33/60364	0.000176345	0.00284072	0.00220913	g31687/g19795/g31324/g55206/g25248/g26573/g58644	7	GC
GO:0071806	protein transmembrane transport	7/2242	33/60364	0.000176345	0.00284072	0.00220913	g34340/g42829/g55886/g55870/g43465/g37628/g58768	7	GC
GO:0004601	peroxidase activity	22/2242	251/60364	0.000195464	0.00311784	0.00242464	g17013/g54685/g38169/g38168/g24553/g24561/g24556/g24558/g13498/g31518/g25984/g28562/g48088/g34467/g28563/g59/g1820/g23950/g48090/g38344/g34471/g30139	22	GC
GO:0042744	hydrogen peroxide catabolic process	18/2242	185/60364	0.000202456	0.00319801	0.00248699	g17013/g54685/g38168/g24553/g24561/g24556/g24558/g13498/g25984/g28562/g48088/g34467/g28563/g1820/g23950/g48090/g34471/g30139	18	GC
GO:0005347	ATP transmembrane transporter activity	5/2242	16/60364	0.000218037	0.00337853	0.00262737	g23677/g11498/g50874/g4352/g11474	5	GC
GO:0071763	nuclear membrane organization	5/2242	16/60364	0.000218037	0.00337853	0.00262737	g25789/g20020/g25933/g59363/g9705	5	GC
GO:0009414	response to water deprivation	9/2242	57/60364	0.000237808	0.00365013	0.00283858	g42334/g24090/g59664/g55871/g25287/g25531/g50297/g26017/g29404	9	GC
GO:0072657	protein localization to membrane	11/2242	83/60364	0.000250188	0.00380426	0.00295845	g44493/g24223/g47083/g43384/g31343/g34343/g17583/g37017/g26452/g34380/g16514	11	GC
GO:0032984	protein-containing complex disassembly	8/2242	46/60364	0.00026462	0.00398645	0.00310013	g25789/g10295/g63857/g5119/g20020/g25933/g47842/g9705	8	GC
GO:0010324	membrane invagination	5/2242	17/60364	0.000299443	0.00438913	0.00341328	g25789/g53713/g20020/g23233/g11951	5	GC
GO:0045261	proton-transporting ATP synthase complex, catalytic core F(1)	5/2242	17/60364	0.000299443	0.00438913	0.00341328	g8941/g12522/g3966/g7428/g32037	5	GC
GO:0061631	ubiquitin conjugating enzyme activity	5/2242	17/60364	0.000299443	0.00438913	0.00341328	g24688/g25626/g13482/g3665/g43487	5	GC
GO:0080163	regulation of protein serine/threonine phosphatase activity	6/2242	26/60364	0.000316305	0.00455158	0.00353961	g24506/g25480/g20407/g39321/g55788/g19566	6	GC
GO:0070588	calcium ion transmembrane transport	14/2242	129/60364	0.000329129	0.00455158	0.00353961	g17271/g13247/g13246/g26745/g26743/g54257/g58358/g26747/g29049/g34255/g63942/g13242/g31260/g58552	14	GC
GO:0004470	malic enzyme activity	4/2242	10/60364	0.000332906	0.00455158	0.00353961	g62884/g62786/g25960/g30367	4	GC
GO:0004471	malate dehydrogenase (decarboxylating) (NAD+) activity	4/2242	10/60364	0.000332906	0.00455158	0.00353961	g62884/g62786/g25960/g30367	4	GC
GO:0005828	kinetochore microtubule	4/2242	10/60364	0.000332906	0.00455158	0.00353961	g25789/g20020/g25933/g9705	4	GC
GO:0006072	glycerol-3-phosphate metabolic process	4/2242	10/60364	0.000332906	0.00455158	0.00353961	g54994/g42999/g31501/g8888	4	GC
GO:0006116	NADH oxidation	4/2242	10/60364	0.000332906	0.00455158	0.00353961	g34479/g46350/g46336/g42999	4	GC
GO:0016629	12-oxophytodienoate reductase activity	4/2242	10/60364	0.000332906	0.00455158	0.00353961	g58412/g26200/g50545/g50543	4	GC
GO:0051287	NAD binding	18/2242	193/60364	0.000340633	0.00461841	0.00359158	g30051/g67/g62884/g62786/g40628/g16865/g63871/g25960/g18387/g17371/g42999/g29486/g161/g40225/g27454/g8888/g4152/g30367	18	GC
GO:0006914	autophagy	16/2242	161/60364	0.000351769	0.00472998	0.00367835	g54078/g42874/g24687/g25789/g10295/g4449/g34439/g20020/g51025/g61061/g38272/g25933/g58683/g47842/g221/g9705	16	GC
GO:0012501	programmed cell death	14/2242	130/60364	0.000356417	0.00475319	0.0036964	g37804/g45120/g34703/g50259/g67/g28022/g7746/g46268/g19789/g4403/g59541/g29439/g19663/g14080	14	GC
GO:2000022	regulation of jasmonic acid mediated signaling pathway	7/2242	37/60364	0.000373293	0.00492481	0.00382986	g58862/g13640/g36877/g59006/g55036/g60879/g34519	7	GC
GO:0042221	response to chemical	12/2242	101/60364	0.000375339	0.00492481	0.00382986	g20967/g20968/g24353/g24348/g36781/g12152/g23950/g24347/g42391/g24349/g24356/g24343	12	GC
GO:0070534	protein K63-linked ubiquitination	6/2242	27/60364	0.000393948	0.00512762	0.00398758	g30104/g30184/g4533/g54278/g43487/g60755	6	GC
GO:0071011	precatalytic spliceosome	5/2242	18/60364	0.000401951	0.00519027	0.0040363	g34722/g34118/g49767/g51089/g58190	5	GC
GO:0015867	ATP transport	4/2242	11/60364	0.00050774	0.00645385	0.00501894	g23677/g38155/g11498/g25915	4	GC
GO:0097718	disordered domain specific binding	4/2242	11/60364	0.00050774	0.00645385	0.00501894	g67/g20607/g10024/g61288	4	GC
GO:0005791	rough endoplasmic reticulum	5/2242	19/60364	0.000528861	0.00656838	0.00510801	g34340/g43465/g37628/g5038/g20591	5	GC
GO:0036503	ERAD pathway	5/2242	19/60364	0.000528861	0.00656838	0.00510801	g46297/g10295/g59326/g59777/g47842	5	GC
GO:0071218	cellular response to misfolded protein	5/2242	19/60364	0.000528861	0.00656838	0.00510801	g46297/g10295/g59777/g18866/g47842	5	GC
GO:0030427	site of polarized growth	8/2242	51/60364	0.000548004	0.00675456	0.00525279	g42874/g24687/g30006/g4449/g47189/g51025/g54996/g58683	8	GC
GO:0007015	actin filament organization	15/2242	154/60364	0.000655013	0.00801283	0.00623131	g20732/g5296/g10039/g9732/g42852/g43045/g55960/g53713/g36405/g29133/g25641/g2882/g5246/g8294/g29416	15	GC
GO:0051701	biological process involved in interaction with host	5/2242	20/60364	0.000683655	0.0083008	0.00645525	g60033/g25789/g20020/g25933/g9705	5	GC
GO:0001676	long-chain fatty acid metabolic process	8/2242	53/60364	0.00071439	0.00859081	0.00668078	g38168/g39320/g34092/g5538/g48365/g54808/g55653/g38282	8	GC
GO:0015629	actin cytoskeleton	16/2242	172/60364	0.000728988	0.00859081	0.00668078	g5296/g42874/g24687/g53702/g10039/g42852/g55960/g4449/g25502/g3856/g51025/g25641/g41890/g2882/g58683/g8294	16	GC
GO:0005749	mitochondrial respiratory chain complex II, succinate dehydrogenase complex (ubiquinone)	4/2242	12/60364	0.000739222	0.00859081	0.00668078	g30191/g46717/g1341/g51059	4	GC
GO:0006734	NADH metabolic process	4/2242	12/60364	0.000739222	0.00859081	0.00668078	g26092/g63857/g13124/g47842	4	GC
GO:0009051	pentose-phosphate shunt, oxidative branch	4/2242	12/60364	0.000739222	0.00859081	0.00668078	g12268/g17538/g27212/g30197	4	GC
GO:0030497	fatty acid elongation	4/2242	12/60364	0.000739222	0.00859081	0.00668078	g307/g25622/g27454/g29829	4	GC
GO:0042026	protein refolding	10/2242	80/60364	0.000755799	0.00872118	0.00678216	g3669/g48462/g48148/g55886/g55870/g3454/g34218/g25727/g17853/g42726	10	GC
GO:0140662	ATP-dependent protein folding chaperone	13/2242	125/60364	0.000794748	0.00910602	0.00708145	g3669/g48462/g20607/g10024/g48148/g34361/g55886/g55870/g55311/g61288/g34218/g17853/g42726	13	GC
GO:0006979	response to oxidative stress	23/2242	297/60364	0.000816766	0.00929286	0.00722674	g17013/g54685/g38169/g38168/g21289/g24553/g24561/g24556/g24558/g13498/g38850/g28562/g48088/g841/g58913/g34467/g28563/g23950/g48090/g34471/g19663/g50768/g30139	23	GC
GO:0006887	exocytosis	14/2242	142/60364	0.000866756	0.00969486	0.00753936	g49304/g49242/g24223/g59996/g30046/g53292/g55116/g48659/g58297/g25067/g49301/g54996/g17583/g3417	14	GC
GO:0008106	alcohol dehydrogenase (NADP+) activity	5/2242	21/60364	0.000869975	0.00969486	0.00753936	g24330/g55949/g34401/g36868/g39962	5	GC
GO:0034389	lipid droplet organization	5/2242	21/60364	0.000869975	0.00969486	0.00753936	g496/g23469/g2425/g40106/g40134	5	GC
GO:0051641	cellular localization	10/2242	82/60364	0.000918577	0.0101049	0.00785823	g60914/g59996/g25789/g54958/g53292/g20020/g25933/g59743/g9705/g9243	10	GC
GO:0008283	cell population proliferation	8/2242	55/60364	0.000919191	0.0101049	0.00785823	g24223/g3844/g31181/g27232/g34255/g17583/g60755/g59743	8	GC
GO:0006816	calcium ion transport	11/2242	97/60364	0.000961844	0.0104391	0.00811817	g17271/g13247/g13246/g26745/g14262/g26743/g26747/g29049/g13242/g31260/g58552	11	GC
GO:0009742	brassinosteroid mediated signaling pathway	7/2242	43/60364	0.000962429	0.0104391	0.00811817	g41806/g60458/g14632/g49741/g4414/g17064/g34697	7	GC
GO:0018105	peptidyl-serine phosphorylation	17/2242	194/60364	0.000990932	0.0106771	0.00830324	g59849/g20372/g58509/g8285/g34428/g24869/g12283/g3472/g55211/g9704/g12408/g19751/g49497/g217/g61035/g12845/g18649	17	GC
GO:0000421	autophagosome membrane	5/2242	22/60364	0.0010916	0.0116844	0.0090866	g25789/g9591/g20020/g25933/g9705	5	GC
GO:0009873	ethylene-activated signaling pathway	17/2242	196/60364	0.00110934	0.0117967	0.00917392	g28078/g28064/g42323/g35344/g4488/g11765/g31385/g60059/g34543/g25719/g21673/g55154/g14886/g31279/g50825/g60949/g56037	17	GC
GO:0005811	lipid droplet	12/2242	116/60364	0.00130312	0.0137526	0.0106949	g496/g67/g23469/g60530/g25626/g63857/g54808/g2425/g59742/g40106/g40134/g47842	12	GC
GO:0005484	SNAP receptor activity	10/2242	86/60364	0.00133056	0.0137526	0.0106949	g59996/g14677/g53292/g58297/g58668/g25067/g61223/g24648/g31285/g3417	10	GC
GO:0008047	enzyme activator activity	11/2242	101/60364	0.0013437	0.0137526	0.0106949	g37804/g42874/g24687/g4449/g63857/g38669/g51025/g43243/g49911/g58683/g47842	11	GC
GO:0004707	MAP kinase activity	5/2242	23/60364	0.00135244	0.0137526	0.0106949	g9346/g35181/g30618/g43602/g50204	5	GC
GO:0030148	sphingolipid biosynthetic process	5/2242	23/60364	0.00135244	0.0137526	0.0106949	g14605/g33872/g42819/g19437/g29829	5	GC
GO:0048729	tissue morphogenesis	5/2242	23/60364	0.00135244	0.0137526	0.0106949	g41427/g46627/g24223/g42468/g17583	5	GC
GO:0051205	protein insertion into membrane	5/2242	23/60364	0.00135244	0.0137526	0.0106949	g58358/g43465/g37628/g37017/g34380	5	GC
GO:0000209	protein polyubiquitination	17/2242	200/60364	0.00138246	0.0138624	0.0107804	g5104/g30104/g48359/g24688/g57562/g9387/g59664/g25626/g13482/g31267/g3665/g351/g60942/g43168/g14080/g60755/g38974	17	GC
GO:0006120	mitochondrial electron transport, NADH to ubiquinone	4/2242	14/60364	0.00140845	0.0138624	0.0107804	g20730/g40225/g24695/g25421	4	GC
GO:0051258	protein polymerization	4/2242	14/60364	0.00140845	0.0138624	0.0107804	g10044/g25789/g20020/g25933	4	GC
GO:0071472	cellular response to salt stress	4/2242	14/60364	0.00140845	0.0138624	0.0107804	g16207/g6911/g13355/g4473	4	GC
GO:0120009	intermembrane lipid transfer	4/2242	14/60364	0.00140845	0.0138624	0.0107804	g12449/g42134/g4342/g9708	4	GC
GO:0051536	iron-sulfur cluster binding	20/2242	254/60364	0.00141436	0.0138624	0.0107804	g30191/g39766/g33703/g30935/g60709/g62637/g4559/g54704/g13661/g40225/g38385/g61616/g48932/g26957/g34032/g49003/g8240/g31442/g25421/g3261	20	GC
GO:0016998	cell wall macromolecule catabolic process	6/2242	34/60364	0.00143366	0.0139674	0.010862	g39605/g39690/g39671/g39599/g39600/g39673	6	GC
GO:0005388	P-type calcium transporter activity	7/2242	46/60364	0.0014513	0.0140552	0.0109302	g13247/g13246/g26745/g26743/g29049/g13242/g58552	7	GC
GO:0005788	endoplasmic reticulum lumen	8/2242	59/60364	0.00146894	0.0141418	0.0109976	g59319/g48462/g10024/g34361/g55311/g60815/g34218/g36402	8	GC
GO:0045324	late endosome to vacuole transport	5/2242	24/60364	0.00165648	0.0158535	0.0123287	g25789/g31361/g20020/g25933/g9705	5	GC
GO:0017018	myosin phosphatase activity	14/2242	153/60364	0.00177751	0.0169123	0.0131521	g50356/g35826/g5556/g3854/g41795/g31111/g59823/g59622/g26392/g49741/g47187/g29432/g12597/g42831	14	GC
GO:0003954	NADH dehydrogenase activity	4/2242	15/60364	0.00186438	0.0171376	0.0133273	g34479/g46350/g46336/g25421	4	GC
GO:0004450	isocitrate dehydrogenase (NADP+) activity	4/2242	15/60364	0.00186438	0.0171376	0.0133273	g16865/g63871/g29486/g4152	4	GC
GO:0016759	cellulose synthase activity	4/2242	15/60364	0.00186438	0.0171376	0.0133273	g708/g19658/g21638/g30519	4	GC
GO:0030125	clathrin vesicle coat	4/2242	15/60364	0.00186438	0.0171376	0.0133273	g46312/g10012/g7665/g34336	4	GC
GO:0051014	actin filament severing	4/2242	15/60364	0.00186438	0.0171376	0.0133273	g5296/g42852/g43045/g25641	4	GC
GO:0090447	glycerol-3-phosphate 2-O-acyltransferase activity	4/2242	15/60364	0.00186438	0.0171376	0.0133273	g18089/g56819/g18081/g43348	4	GC
GO:0006796	phosphate-containing compound metabolic process	11/2242	106/60364	0.00198742	0.0181659	0.014127	g56005/g42874/g24687/g20818/g4449/g16577/g51025/g60000/g61078/g58683/g30466	11	GC
GO:0030133	transport vesicle	5/2242	25/60364	0.00200781	0.0182497	0.0141922	g24223/g41669/g23363/g38272/g17583	5	GC
GO:0006006	glucose metabolic process	7/2242	49/60364	0.00211495	0.0190112	0.0147844	g17538/g67/g40628/g60033/g41721/g30197/g50218	7	GC
GO:0070971	endoplasmic reticulum exit site	7/2242	49/60364	0.00211495	0.0190112	0.0147844	g59749/g41669/g23363/g38272/g14150/g9042/g9451	7	GC
GO:0043085	positive regulation of catalytic activity	12/2242	123/60364	0.00215184	0.0192365	0.0149596	g37804/g26717/g46494/g5757/g63857/g4403/g54278/g61288/g35291/g43243/g49911/g47842	12	GC
GO:0043169	cation binding	12/2242	124/60364	0.00230345	0.0204491	0.0159025	g54461/g38680/g50356/g5556/g3854/g31111/g59823/g59622/g26392/g35736/g29432/g42831	12	GC
GO:0030544	Hsp70 protein binding	7/2242	50/60364	0.00238153	0.0204491	0.0159025	g3454/g3679/g9126/g25727/g18866/g57859/g12571	7	GC
GO:0030100	regulation of endocytosis	5/2242	26/60364	0.00241054	0.0204491	0.0159025	g30188/g13769/g34953/g23233/g11951	5	GC
GO:0004017	adenylate kinase activity	4/2242	16/60364	0.00241316	0.0204491	0.0159025	g9065/g50523/g31107/g8788	4	GC
GO:0006102	isocitrate metabolic process	4/2242	16/60364	0.00241316	0.0204491	0.0159025	g16865/g63871/g29486/g4152	4	GC
GO:0030060	L-malate dehydrogenase activity	4/2242	16/60364	0.00241316	0.0204491	0.0159025	g59975/g13124/g17152/g43493	4	GC
GO:0030130	clathrin coat of trans-Golgi network vesicle	4/2242	16/60364	0.00241316	0.0204491	0.0159025	g46312/g25502/g3856/g20359	4	GC
GO:0030132	clathrin coat of coated pit	4/2242	16/60364	0.00241316	0.0204491	0.0159025	g46312/g25502/g3856/g20359	4	GC
GO:0043436	oxoacid metabolic process	4/2242	16/60364	0.00241316	0.0204491	0.0159025	g30935/g54704/g16836/g8240	4	GC
GO:0050708	regulation of protein secretion	4/2242	16/60364	0.00241316	0.0204491	0.0159025	g43184/g54808/g34255/g58058	4	GC
GO:0016758	hexosyltransferase activity	22/2242	304/60364	0.0024527	0.0206764	0.0160794	g20831/g43072/g59659/g37768/g58541/g57512/g54039/g37807/g58540/g14294/g941/g36141/g53610/g42801/g42541/g34146/g36154/g54708/g59662/g60029/g63762/g61187	22	GC
GO:0099080	supramolecular complex	8/2242	64/60364	0.00249113	0.0208921	0.0162471	g46627/g50769/g53702/g25641/g34255/g914/g46322/g55953	8	GC
GO:0017157	regulation of exocytosis	6/2242	38/60364	0.00259384	0.021504	0.0167229	g24223/g25789/g30188/g20020/g4818/g17583	6	GC
GO:0090316	positive regulation of intracellular protein transport	6/2242	38/60364	0.00259384	0.021504	0.0167229	g41669/g55886/g55870/g4403/g23363/g50619	6	GC
GO:0006635	fatty acid beta-oxidation	10/2242	94/60364	0.00260374	0.021504	0.0167229	g23677/g5212/g26746/g49783/g6479/g14019/g54581/g55653/g54804/g38282	10	GC
GO:0009833	plant-type primary cell wall biogenesis	7/2242	51/60364	0.00267322	0.0219663	0.0170825	g708/g19658/g21638/g30519/g840/g38381/g42228	7	GC
GO:0034765	regulation of monoatomic ion transmembrane transport	8/2242	65/60364	0.00274982	0.0224822	0.0174837	g535/g42874/g24687/g24627/g4449/g51025/g34255/g58683	8	GC
GO:0048278	vesicle docking	5/2242	27/60364	0.00286886	0.0233382	0.0181493	g14677/g58297/g58668/g25067/g61223	5	GC
GO:0016760	cellulose synthase (UDP-forming) activity	7/2242	52/60364	0.00299156	0.0240791	0.0187255	g708/g19658/g21638/g30519/g840/g38381/g42228	7	GC
GO:0045292	mRNA cis splicing, via spliceosome	8/2242	66/60364	0.00302899	0.0240791	0.0187255	g53950/g59582/g30705/g50520/g12408/g203/g56438/g12845	8	GC
GO:0005758	mitochondrial intermembrane space	4/2242	17/60364	0.00306354	0.0240791	0.0187255	g46494/g5757/g60709/g4342	4	GC
GO:0007205	protein kinase C-activating G protein-coupled receptor signaling pathway	4/2242	17/60364	0.00306354	0.0240791	0.0187255	g20818/g16577/g60000/g61078	4	GC
GO:0008541	proteasome regulatory particle, lid subcomplex	4/2242	17/60364	0.00306354	0.0240791	0.0187255	g42784/g28080/g4478/g38386	4	GC
GO:0016281	eukaryotic translation initiation factor 4F complex	4/2242	17/60364	0.00306354	0.0240791	0.0187255	g47131/g34714/g58452/g30459	4	GC
GO:0019205	nucleobase-containing compound kinase activity	4/2242	17/60364	0.00306354	0.0240791	0.0187255	g9065/g50523/g31107/g8788	4	GC
GO:0009055	electron transfer activity	16/2242	198/60364	0.0031264	0.024455	0.0190178	g54155/g54220/g17317/g30191/g26717/g46494/g17304/g25730/g5757/g60709/g4559/g31439/g46717/g48932/g49003/g1341	16	GC
GO:0009086	methionine biosynthetic process	6/2242	40/60364	0.00338634	0.025897	0.0201393	g13268/g18387/g42468/g12855/g30069/g18954	6	GC
GO:0015250	water channel activity	6/2242	40/60364	0.00338634	0.025897	0.0201393	g37613/g55284/g8733/g54953/g25287/g25531	6	GC
GO:0012507	ER to Golgi transport vesicle membrane	5/2242	28/60364	0.00338694	0.025897	0.0201393	g59749/g14150/g24648/g31285/g9042	5	GC
GO:0015749	monosaccharide transmembrane transport	5/2242	28/60364	0.00338694	0.025897	0.0201393	g59238/g7087/g6980/g25987/g25970	5	GC
GO:0072583	clathrin-dependent endocytosis	9/2242	82/60364	0.00339033	0.025897	0.0201393	g46312/g41721/g1857/g21727/g5119/g59771/g1856/g20359/g50215	9	GC
GO:0022900	electron transport chain	14/2242	165/60364	0.00356068	0.0270712	0.0210523	g54155/g54220/g17317/g30191/g46494/g17304/g5757/g60709/g46336/g62637/g4559/g22580/g1341/g1033	14	GC
GO:0000275	mitochondrial proton-transporting ATP synthase complex, catalytic sector F(1)	4/2242	18/60364	0.00382399	0.0288039	0.0223998	g12522/g3966/g7428/g32037	4	GC
GO:0006596	polyamine biosynthetic process	4/2242	18/60364	0.00382399	0.0288039	0.0223998	g41000/g24062/g1206/g47608	4	GC
GO:0016207	4-coumarate-CoA ligase activity	8/2242	69/60364	0.0040002	0.0299923	0.023324	g39320/g34092/g20584/g55289/g5538/g54808/g4683/g27170	8	GC
GO:0000145	exocyst	9/2242	85/60364	0.00431665	0.0320693	0.0249392	g49304/g49242/g24223/g30046/g55116/g48659/g49301/g54996/g17583	9	GC
GO:0006402	mRNA catabolic process	9/2242	85/60364	0.00431665	0.0320693	0.0249392	g327/g9519/g5407/g25083/g31515/g411/g14259/g5724/g200	9	GC
GO:0051247	positive regulation of protein metabolic process	12/2242	134/60364	0.00435389	0.032199	0.0250401	g37804/g46494/g5757/g63857/g4403/g54278/g61288/g4429/g47842/g59761/g200/g20591	12	GC
GO:0009626	plant-type hypersensitive response	5/2242	30/60364	0.00461906	0.0338523	0.0263258	g34703/g50259/g28022/g7746/g46268	5	GC
GO:0016101	diterpenoid metabolic process	5/2242	30/60364	0.00461906	0.0338523	0.0263258	g59319/g19288/g55949/g34401/g53665	5	GC
GO:0032527	protein exit from endoplasmic reticulum	4/2242	19/60364	0.0047027	0.0343107	0.0266823	g10295/g59326/g373/g47842	4	GC
GO:0010411	xyloglucan metabolic process	6/2242	43/60364	0.00489476	0.0355525	0.027648	g9043/g50287/g20813/g55026/g54376/g54377	6	GC
GO:0006874	intracellular calcium ion homeostasis	9/2242	87/60364	0.00503623	0.0363245	0.0282483	g26745/g26743/g54257/g4403/g29049/g34255/g63942/g31260/g20042	9	GC
GO:0016776	phosphotransferase activity, phosphate group as acceptor	3/2242	10/60364	0.00504569	0.0363245	0.0282483	g50523/g31107/g8788	3	GC
GO:0010033	response to organic substance	11/2242	120/60364	0.00519808	0.0372567	0.0289733	g42874/g24687/g41000/g4449/g19789/g61288/g51025/g34255/g58683/g59743/g20666	11	GC
GO:0006098	pentose-phosphate shunt	5/2242	31/60364	0.00534136	0.0378249	0.0294151	g12268/g17538/g27212/g13666/g30197	5	GC
GO:0030126	COPI vesicle coat	5/2242	31/60364	0.00534136	0.0378249	0.0294151	g34726/g45955/g60523/g41744/g51334	5	GC
GO:0006631	fatty acid metabolic process	17/2242	228/60364	0.0053471	0.0378249	0.0294151	g39499/g24546/g39320/g34092/g39589/g20584/g55289/g23509/g5538/g60068/g6479/g27454/g41652/g54581/g55653/g29829/g38282	17	GC
GO:0042391	regulation of membrane potential	7/2242	58/60364	0.00554915	0.0389158	0.0302635	g5572/g24627/g63857/g34255/g3602/g5505/g47842	7	GC
GO:0051336	regulation of hydrolase activity	7/2242	58/60364	0.00554915	0.0389158	0.0302635	g37804/g46494/g5757/g63857/g4403/g49911/g47842	7	GC
GO:0004143	ATP-dependent diacylglycerol kinase activity	4/2242	20/60364	0.00570746	0.0393476	0.0305993	g20818/g16577/g60000/g61078	4	GC
GO:0006754	ATP biosynthetic process	4/2242	20/60364	0.00570746	0.0393476	0.0305993	g8941/g12522/g7428/g32037	4	GC
GO:0045165	cell fate commitment	4/2242	20/60364	0.00570746	0.0393476	0.0305993	g24223/g22103/g17583/g34516	4	GC
GO:0046940	nucleoside monophosphate phosphorylation	4/2242	20/60364	0.00570746	0.0393476	0.0305993	g9065/g50523/g31107/g8788	4	GC
GO:0006890	retrograde vesicle-mediated transport, Golgi to endoplasmic reticulum	9/2242	89/60364	0.00584546	0.040129	0.0312069	g29897/g30460/g34726/g45955/g60523/g41744/g31285/g51334/g31120	9	GC
GO:0000165	MAPK cascade	7/2242	59/60364	0.00609841	0.0411098	0.0319697	g9346/g35181/g30618/g59458/g43602/g60203/g50204	7	GC
GO:0030139	endocytic vesicle	7/2242	59/60364	0.00609841	0.0411098	0.0319697	g60914/g29609/g4818/g13769/g59742/g61061/g34953	7	GC
GO:0035556	intracellular signal transduction	27/2242	430/60364	0.00611316	0.0411098	0.0319697	g59049/g29557/g174/g54775/g34342/g48704/g59849/g13858/g53713/g29609/g34108/g58509/g8285/g34428/g1128/g19789/g24869/g12283/g3472/g60716/g60253/g29133/g42480/g4739/g50204/g217/g59389	27	GC
GO:0015267	channel activity	8/2242	74/60364	0.00613194	0.0411098	0.0319697	g37613/g34024/g55284/g8733/g54953/g25287/g25531/g58678	8	GC
GO:0030127	COPII vesicle coat	5/2242	32/60364	0.00613993	0.0411098	0.0319697	g59749/g373/g14150/g9042/g9451	5	GC
GO:0031347	regulation of defense response	5/2242	32/60364	0.00613993	0.0411098	0.0319697	g13640/g8479/g55036/g25262/g60879	5	GC
GO:0106310	protein serine kinase activity	19/2242	271/60364	0.00647309	0.0430138	0.0334504	g9346/g27623/g21705/g58505/g34462/g35181/g61091/g16842/g61106/g16664/g30618/g13858/g54387/g34455/g61107/g60253/g5088/g43602/g37674	19	GC
GO:0004721	phosphoprotein phosphatase activity	15/2242	195/60364	0.00647718	0.0430138	0.0334504	g58895/g50356/g35826/g5556/g3854/g41795/g31111/g59823/g37416/g59622/g26392/g49741/g29432/g60767/g42831	15	GC
GO:0140825	lactoperoxidase activity	14/2242	177/60364	0.00658982	0.0434936	0.0338235	g17013/g54685/g24553/g24561/g24556/g24558/g13498/g28562/g48088/g34467/g28563/g48090/g34471/g30139	14	GC
GO:0051082	unfolded protein binding	17/2242	233/60364	0.0066029	0.0434936	0.0338235	g20607/g58896/g10024/g34361/g55886/g55870/g3454/g59019/g9126/g61288/g34218/g25727/g36402/g30799/g42726/g26970/g12571	17	GC
GO:0030136	clathrin-coated vesicle	7/2242	60/60364	0.00668719	0.0435637	0.033878	g10012/g7665/g21727/g59771/g19665/g21469/g50215	7	GC
GO:0000276	mitochondrial proton-transporting ATP synthase complex, coupling factor F(o)	3/2242	11/60364	0.00674742	0.0435637	0.033878	g25923/g48041/g53220	3	GC
GO:0004449	isocitrate dehydrogenase (NAD+) activity	3/2242	11/60364	0.00674742	0.0435637	0.033878	g63871/g29486/g4152	3	GC
GO:0015866	ADP transport	3/2242	11/60364	0.00674742	0.0435637	0.033878	g23677/g38155/g25915	3	GC
GO:0070072	vacuolar proton-transporting V-type ATPase complex assembly	3/2242	11/60364	0.00674742	0.0435637	0.033878	g45357/g58139/g14662	3	GC
GO:0000280	nuclear division	4/2242	21/60364	0.00684569	0.0436782	0.033967	g25789/g38689/g20020/g25933	4	GC
GO:0006672	ceramide metabolic process	4/2242	21/60364	0.00684569	0.0436782	0.033967	g60759/g33872/g19437/g46594	4	GC
GO:0007035	vacuolar acidification	4/2242	21/60364	0.00684569	0.0436782	0.033967	g60914/g42829/g30101/g58768	4	GC
GO:0005546	phosphatidylinositol-4,5-bisphosphate binding	9/2242	92/60364	0.0072428	0.0460314	0.0357971	g49304/g49242/g43045/g21727/g30046/g59771/g48659/g49301/g50215	9	GC
GO:0003006	developmental process involved in reproduction	7/2242	61/60364	0.00731714	0.0460827	0.035837	g24223/g10024/g3454/g47213/g25727/g54996/g17583	7	GC
GO:0030244	cellulose biosynthetic process	7/2242	61/60364	0.00731714	0.0460827	0.035837	g708/g19658/g21638/g30519/g840/g38381/g42228	7	GC
GO:0071555	cell wall organization	20/2242	294/60364	0.00733584	0.0460827	0.035837	g55085/g60617/g9043/g42794/g50287/g60616/g708/g30055/g41796/g19658/g4304/g21638/g37069/g30519/g55144/g30836/g54376/g54377/g42228/g37631	20	GC
GO:0016197	endosomal transport	6/2242	47/60364	0.00760596	0.0475958	0.0370136	g24223/g3303/g645/g61061/g17583/g24052	6	GC
GO:0004869	cysteine-type endopeptidase inhibitor activity	5/2242	34/60364	0.00798169	0.0495657	0.0385456	g60852/g59388/g24709/g4464/g827	5	GC
GO:0008198	ferrous iron binding	5/2242	34/60364	0.00798169	0.0495657	0.0385456	g33703/g20747/g43184/g42775/g58058	5	GC

## Sheet: Table S3D
Table S3D GO enrichement assay for down-regulated genes in different cell types
ID	Description	GeneRatio	BgRatio	pvalue	p.adjust	qvalue	geneID	Count	Cell type
GO:0045551	cinnamyl-alcohol dehydrogenase activity	8/962	34/60364	5.08501e-08	4.96297e-05	4.07872e-05	g549/g36868/g39962/g29793/g29798/g29794/g29779/g29785	8	PMC
GO:0015250	water channel activity	8/962	40/60364	1.97938e-07	6.20352e-05	5.09823e-05	g4732/g8733/g37613/g55284/g25531/g54953/g4812/g10331	8	PMC
GO:0009809	lignin biosynthetic process	8/962	41/60364	2.42486e-07	6.20352e-05	5.09823e-05	g549/g36868/g39962/g29793/g29798/g29794/g29779/g29785	8	PMC
GO:0032509	endosome transport via multivesicular body sorting pathway	6/962	18/60364	2.54243e-07	6.20352e-05	5.09823e-05	g25789/g25933/g31361/g34439/g20020/g63857	6	PMC
GO:0098552	side of membrane	10/962	78/60364	4.77274e-07	9.31639e-05	7.65648e-05	g4104/g42093/g54155/g4284/g29841/g54220/g59483/g2267/g10666/g39376	10	PMC
GO:0009734	auxin-activated signaling pathway	15/962	224/60364	3.80223e-06	0.000534155	0.000438984	g13864/g20967/g5344/g13174/g13867/g12152/g13217/g47162/g26685/g13218/g51198/g24348/g9720/g24356/g59391	15	PMC
GO:0016050	vesicle organization	8/962	58/60364	3.83103e-06	0.000534155	0.000438984	g55665/g15319/g21727/g25933/g59749/g60914/g373/g23363	8	PMC
GO:0005516	calmodulin binding	16/962	264/60364	6.55044e-06	0.000781109	0.000641939	g24788/g52724/g1093/g26745/g29049/g60387/g25701/g24869/g59849/g649/g41670/g49054/g59494/g25320/g217/g58509	16	PMC
GO:0005768	endosome	16/962	266/60364	7.20285e-06	0.000781109	0.000641939	g46829/g25789/g31588/g47637/g20732/g25933/g31361/g34439/g7665/g20020/g29609/g7736/g14677/g29555/g42682/g43371	16	PMC
GO:0010143	cutin biosynthetic process	5/962	19/60364	9.82581e-06	0.000958999	0.000788133	g56819/g34092/g5538/g43348/g59664	5	PMC
GO:0009873	ethylene-activated signaling pathway	13/962	196/60364	1.83324e-05	0.00162658	0.00133677	g34127/g42323/g34543/g59147/g20630/g5499/g43231/g4488/g43234/g43232/g46272/g43233/g55154	13	PMC
GO:0015267	channel activity	8/962	74/60364	2.40754e-05	0.00195813	0.00160925	g4732/g8733/g37613/g55284/g25531/g54953/g4812/g10331	8	PMC
GO:0042546	cell wall biogenesis	7/962	58/60364	3.78814e-05	0.00278647	0.00229	g54377/g54659/g54657/g20584/g54376/g30533/g30920	7	PMC
GO:0033180	proton-transporting V-type ATPase, V1 domain	4/962	13/60364	4.08681e-05	0.00278647	0.00229	g60914/g42829/g58768/g55099	4	PMC
GO:0012505	endomembrane system	15/962	275/60364	4.28249e-05	0.00278647	0.00229	g16369/g23156/g58297/g4784/g25067/g10102/g26717/g21727/g55107/g29609/g60914/g7736/g14677/g42682/g17583	15	PMC
GO:0051641	cellular localization	8/962	82/60364	5.09128e-05	0.00310568	0.00255234	g25789/g53292/g59996/g25933/g20020/g60914/g35324/g59743	8	PMC
GO:0046034	ATP metabolic process	4/962	15/60364	7.60621e-05	0.00436686	0.00358881	g60914/g42829/g58768/g55099	4	PMC
GO:0032984	protein-containing complex disassembly	6/962	46/60364	8.77314e-05	0.00451443	0.00371009	g25789/g25933/g20020/g5119/g63857/g30196	6	PMC
GO:0046961	proton-transporting ATPase activity, rotational mechanism	7/962	66/60364	8.78834e-05	0.00451443	0.00371009	g30966/g38594/g60914/g42829/g58768/g39341/g55099	7	PMC
GO:0000323	lytic vacuole	11/962	183/60364	0.00018927	0.00910082	0.00747932	g23156/g25789/g16965/g25933/g20020/g60914/g373/g5038/g43371/g58768/g20578	11	PMC
GO:0003924	GTPase activity	19/962	462/60364	0.000195817	0.00910082	0.00747932	g46829/g55665/g30460/g15319/g17980/g40877/g29609/g7736/g20583/g31341/g29555/g42682/g59813/g43371/g30448/g59743/g23363/g55594/g17583	19	PMC
GO:0006833	water transport	4/962	19/60364	0.000205291	0.00910744	0.00748476	g4732/g8733/g55284/g54953	4	PMC
GO:2000022	regulation of jasmonic acid mediated signaling pathway	5/962	37/60364	0.000290514	0.0123279	0.0101314	g55036/g34766/g13640/g36877/g59006	5	PMC
GO:0045927	positive regulation of growth	4/962	22/60364	0.000372987	0.0145924	0.0119924	g23469/g24319/g41713/g25770	4	PMC
GO:0016762	xyloglucan:xyloglucosyl transferase activity	5/962	39/60364	0.00037378	0.0145924	0.0119924	g54377/g54659/g54657/g54376/g30920	5	PMC
GO:0005828	kinetochore microtubule	3/962	10/60364	0.000445332	0.016116	0.0132446	g25789/g25933/g20020	3	PMC
GO:0004707	MAP kinase activity	4/962	23/60364	0.000445833	0.016116	0.0132446	g4784/g10102/g30344/g30618	4	PMC
GO:0009931	calcium-dependent protein serine/threonine kinase activity	6/962	62/60364	0.000464082	0.0161766	0.0132944	g25701/g24869/g59849/g25320/g217/g58509	6	PMC
GO:0006887	exocytosis	9/962	142/60364	0.00048449	0.0163056	0.0134004	g58297/g53292/g25067/g59996/g48659/g30046/g29555/g49304/g17583	9	PMC
GO:0004683	calmodulin-dependent protein kinase activity	6/962	63/60364	0.000506084	0.0164646	0.0135311	g25701/g24869/g59849/g25320/g217/g58509	6	PMC
GO:0045324	late endosome to vacuole transport	4/962	24/60364	0.000528276	0.0166322	0.0136688	g25789/g25933/g31361/g20020	4	PMC
GO:0004842	ubiquitin-protein transferase activity	18/962	464/60364	0.000565947	0.0171924	0.0141292	g29743/g57577/g59972/g25066/g37622/g58790/g58284/g42380/g60848/g57652/g24688/g12012/g50526/g4341/g54450/g351/g25402/g54278	18	PMC
GO:0010411	xyloglucan metabolic process	5/962	43/60364	0.000592974	0.0171924	0.0141292	g54377/g54659/g54657/g54376/g30920	5	PMC
GO:0009611	response to wounding	6/962	65/60364	0.000598916	0.0171924	0.0141292	g26214/g26291/g55036/g34766/g13640/g8413	6	PMC
GO:0004722	protein serine/threonine phosphatase activity	11/962	211/60364	0.000633683	0.0176707	0.0145223	g54461/g35826/g34275/g4951/g59622/g5556/g3854/g58961/g4904/g49362/g13499	11	PMC
GO:0044042	glucan metabolic process	5/962	44/60364	0.000660287	0.0179011	0.0147117	g54377/g54659/g54657/g54376/g30920	5	PMC
GO:0015140	malate transmembrane transporter activity	3/962	13/60364	0.00102412	0.0263037	0.0216171	g29833/g50614/g60230	3	PMC
GO:0044390	ubiquitin-like protein conjugating enzyme binding	3/962	13/60364	0.00102412	0.0263037	0.0216171	g46297/g46847/g59165	3	PMC
GO:0006839	mitochondrial transport	4/962	29/60364	0.00110855	0.0276413	0.0227164	g29833/g50614/g60230/g5655	4	PMC
GO:0016616	oxidoreductase activity, acting on the CH-OH group of donors, NAD or NADP as acceptor	16/962	413/60364	0.00113284	0.0276413	0.0227164	g30051/g549/g36868/g16865/g39962/g29793/g29798/g29794/g54782/g58580/g20736/g29779/g29785/g307/g29486/g51716	16	PMC
GO:0005774	vacuolar membrane	11/962	228/60364	0.0011909	0.0278536	0.0228909	g25789/g25933/g63942/g20020/g38594/g60914/g373/g14677/g5038/g58768/g20578	11	PMC
GO:0018105	peptidyl-serine phosphorylation	10/962	194/60364	0.00119862	0.0278536	0.0228909	g4784/g10102/g25701/g24869/g59849/g19751/g8285/g25320/g217/g58509	10	PMC
GO:0009698	phenylpropanoid metabolic process	6/962	75/60364	0.00127681	0.0285706	0.0234801	g34092/g20584/g19518/g5538/g27170/g51141	6	PMC
GO:0051258	protein polymerization	3/962	14/60364	0.00128802	0.0285706	0.0234801	g25789/g25933/g20020	3	PMC
GO:0008289	lipid binding	12/962	267/60364	0.00133543	0.028964	0.0238035	g24584/g34440/g4284/g16369/g13696/g17891/g24585/g54325/g59483/g19278/g4088/g30521	12	PMC
GO:0010008	endosome membrane	9/962	167/60364	0.00152903	0.0315471	0.0259264	g25789/g25933/g31361/g44493/g20020/g47083/g5038/g3303/g43384	9	PMC
GO:0015116	sulfate transmembrane transporter activity	3/962	15/60364	0.00159101	0.0315471	0.0259264	g29833/g50614/g60230	3	PMC
GO:0016759	cellulose synthase activity	3/962	15/60364	0.00159101	0.0315471	0.0259264	g19658/g30519/g708	3	PMC
GO:0030125	clathrin vesicle coat	3/962	15/60364	0.00159101	0.0315471	0.0259264	g46312/g7665/g34336	3	PMC
GO:0031347	regulation of defense response	4/962	32/60364	0.00161614	0.0315471	0.0259264	g55036/g34766/g25262/g13640	4	PMC
GO:0031201	SNARE complex	6/962	79/60364	0.00167071	0.0319728	0.0262761	g58297/g53292/g25067/g59996/g25469/g14677	6	PMC
GO:0006470	protein dephosphorylation	11/962	239/60364	0.00173064	0.0324828	0.0266953	g54461/g34275/g4951/g59622/g5556/g3854/g58961/g4904/g58895/g49362/g13499	11	PMC
GO:0071806	protein transmembrane transport	4/962	33/60364	0.00181606	0.0325623	0.0267606	g43465/g42829/g55886/g58768	4	PMC
GO:0090158	endoplasmic reticulum membrane organization	4/962	33/60364	0.00181606	0.0325623	0.0267606	g46355/g54117/g31341/g56530	4	PMC
GO:0005743	mitochondrial inner membrane	12/962	279/60364	0.00192835	0.0325623	0.0267606	g21485/g50614/g1899/g60530/g45120/g46350/g26747/g17271/g23677/g39766/g23446/g30191	12	PMC
GO:0071763	nuclear membrane organization	3/962	16/60364	0.00193505	0.0325623	0.0267606	g25789/g25933/g20020	3	PMC
GO:1900150	regulation of defense response to fungus	3/962	16/60364	0.00193505	0.0325623	0.0267606	g25435/g43972/g35117	3	PMC
GO:2000031	regulation of salicylic acid mediated signaling pathway	3/962	16/60364	0.00193505	0.0325623	0.0267606	g34703/g36877/g59006	3	PMC
GO:0072583	clathrin-dependent endocytosis	6/962	82/60364	0.00202196	0.0334481	0.0274886	g39016/g21727/g46312/g1857/g5119/g35324	6	PMC
GO:0046777	protein autophosphorylation	8/962	142/60364	0.00208434	0.0339052	0.0278643	g26627/g25701/g58779/g24869/g59849/g25320/g217/g58509	8	PMC
GO:0033365	protein localization to organelle	7/962	112/60364	0.00217938	0.03487	0.0286572	g25789/g25933/g51025/g43465/g20020/g55886/g17583	7	PMC
GO:0009695	jasmonic acid biosynthetic process	3/962	17/60364	0.002322	0.0365528	0.0300402	g38656/g60443/g29282	3	PMC
GO:0006633	fatty acid biosynthetic process	13/962	325/60364	0.00241016	0.0373384	0.0306858	g63628/g8434/g29224/g25665/g29269/g33892/g12852/g63249/g27170/g13381/g58720/g23509/g13494	13	PMC
GO:0000165	MAPK cascade	5/962	59/60364	0.00250239	0.0381614	0.0313622	g4784/g10102/g59458/g30344/g30618	5	PMC
GO:0000221	vacuolar proton-transporting V-type ATPase, V1 domain	3/962	18/60364	0.00275357	0.041346	0.0339793	g30966/g60914/g58768	3	PMC
GO:0061817	endoplasmic reticulum-plasma membrane tethering	4/962	38/60364	0.00307655	0.0454957	0.0373897	g46355/g16369/g54117/g56530	4	PMC
GO:0019199	transmembrane receptor protein kinase activity	3/962	19/60364	0.00323138	0.047072	0.0386851	g42454/g58779/g54746	3	PMC
GO:1902600	proton transmembrane transport	10/962	223/60364	0.00331314	0.0475532	0.0390806	g39766/g63942/g30966/g38594/g60914/g42829/g58768/g53642/g39341/g55099	10	PMC
GO:0003756	protein disulfide isomerase activity	4/962	39/60364	0.00338544	0.0475968	0.0391165	g1235/g38850/g35612/g41751	4	PMC
GO:0030234	enzyme regulator activity	6/962	91/60364	0.00341371	0.0475968	0.0391165	g58979/g31704/g51050/g53040/g60135/g51025	6	PMC
GO:0000139	Golgi membrane	15/962	422/60364	0.00358886	0.0493342	0.0405443	g59654/g1029/g20831/g55665/g15319/g61120/g29076/g44493/g54742/g55107/g14106/g25579/g47083/g43371/g43384	15	PMC
GO:0046933	proton-transporting ATP synthase activity, rotational mechanism	4/962	40/60364	0.00371475	0.0495505	0.0407221	g60914/g42829/g58768/g55099	4	PMC
GO:0006511	ubiquitin-dependent protein catabolic process	16/962	466/60364	0.00375335	0.0495505	0.0407221	g16447/g25789/g46297/g59809/g46847/g50597/g48359/g24688/g25933/g20828/g59165/g54744/g20020/g13482/g11708/g5038	16	PMC
GO:0051701	biological process involved in interaction with host	3/962	20/60364	0.00375691	0.0495505	0.0407221	g25789/g25933/g20020	3	PMC
GO:0006833	water transport	5/538	19/60364	5.78967e-07	0.00039833	0.00033702	g61049/g55284/g47776/g19675/g4732	5	SMC
GO:0015250	water channel activity	6/538	40/60364	1.44685e-06	0.000497717	0.00042111	g61049/g10331/g55284/g47776/g19675/g4732	6	SMC
GO:0051924	regulation of calcium ion transport	4/538	17/60364	1.35441e-05	0.00310612	0.00262804	g42874/g4449/g24687/g58673	4	SMC
GO:0030234	enzyme regulator activity	7/538	91/60364	1.82281e-05	0.00313523	0.00265266	g24687/g20666/g31704/g60135/g17154/g53040/g51050	7	SMC
GO:0006970	response to osmotic stress	4/538	20/60364	2.6993e-05	0.00371424	0.00314256	g49725/g20526/g58667/g37633	4	SMC
GO:0033179	proton-transporting V-type ATPase, V0 domain	4/538	23/60364	4.82989e-05	0.00531373	0.00449586	g38594/g59779/g34035/g34054	4	SMC
GO:0015267	channel activity	6/538	74/60364	5.40642e-05	0.00531373	0.00449586	g61049/g10331/g55284/g47776/g19675/g4732	6	SMC
GO:0009873	ethylene-activated signaling pathway	9/538	196/60364	7.44423e-05	0.00616434	0.00521554	g54022/g60882/g34543/g46272/g46237/g55038/g59147/g34127/g54463	9	SMC
GO:0033177	proton-transporting two-sector ATPase complex, proton-transporting domain	3/538	10/60364	8.06381e-05	0.00616434	0.00521554	g38594/g59779/g34035	3	SMC
GO:0015140	malate transmembrane transporter activity	3/538	13/60364	0.000188393	0.0129615	0.0109665	g50614/g60230/g29833	3	SMC
GO:0051640	organelle localization	6/538	96/60364	0.000229441	0.0135578	0.011471	g25933/g55714/g58673/g55665/g9705/g15319	6	SMC
GO:0032409	regulation of transporter activity	3/538	14/60364	0.000238186	0.0135578	0.011471	g42874/g4449/g24687	3	SMC
GO:0016032	viral process	4/538	36/60364	0.000293151	0.0135578	0.011471	g25933/g9058/g9705/g60864	4	SMC
GO:0015116	sulfate transmembrane transporter activity	3/538	15/60364	0.000295763	0.0135578	0.011471	g50614/g60230/g29833	3	SMC
GO:0043022	ribosome binding	6/538	101/60364	0.000302156	0.0135578	0.011471	g13403/g55714/g23476/g49962/g15497/g57859	6	SMC
GO:0046961	proton-transporting ATPase activity, rotational mechanism	5/538	66/60364	0.000315298	0.0135578	0.011471	g38594/g59779/g34035/g39341/g34054	5	SMC
GO:0006511	ubiquitin-dependent protein catabolic process	13/538	466/60364	0.000335054	0.0135599	0.0114728	g25933/g13482/g42836/g9387/g48359/g54744/g60575/g20043/g46297/g41710/g30392/g9705/g59809	13	SMC
GO:0000278	mitotic cell cycle	8/538	200/60364	0.000468855	0.0179207	0.0151624	g42874/g4449/g24687/g11677/g25933/g60556/g47187/g914	8	SMC
GO:0032509	endosome transport via multivesicular body sorting pathway	3/538	18/60364	0.000519976	0.0188286	0.0159306	g25933/g9705/g47842	3	SMC
GO:0051246	regulation of protein metabolic process	4/538	44/60364	0.000638647	0.0219695	0.018588	g42874/g4449/g24687/g20666	4	SMC
GO:0009654	photosystem II oxygen evolving complex	3/538	21/60364	0.000830837	0.0272198	0.0230302	g53218/g42791/g1172	3	SMC
GO:0045927	positive regulation of growth	3/538	22/60364	0.000955677	0.0287891	0.024358	g41713/g23469/g25770	3	SMC
GO:0019887	protein kinase regulator activity	4/538	49/60364	0.000962426	0.0287891	0.024358	g42874/g4449/g24687/g31021	4	SMC
GO:0022625	cytosolic large ribosomal subunit	8/538	228/60364	0.00109791	0.0296197	0.0250607	g1573/g29197/g61184/g9864/g57671/g6111/g1805/g9879	8	SMC
GO:0030427	site of polarized growth	4/538	51/60364	0.00111935	0.0296197	0.0250607	g42874/g4449/g24687/g58673	4	SMC
GO:0045454	cell redox homeostasis	4/538	51/60364	0.00111935	0.0296197	0.0250607	g18038/g24662/g58240/g38850	4	SMC
GO:0003743	translation initiation factor activity	8/538	231/60364	0.00119318	0.030404	0.0257243	g13403/g55714/g58778/g34484/g9058/g11580/g45675/g15497	8	SMC
GO:0006413	translational initiation	8/538	233/60364	0.00126027	0.0309667	0.0262004	g13403/g55714/g58778/g34484/g9058/g11580/g45675/g15497	8	SMC
GO:0009414	response to water deprivation	4/538	57/60364	0.00169656	0.0402495	0.0340544	g53971/g49725/g61252/g19675	4	SMC
GO:0006839	mitochondrial transport	3/538	29/60364	0.00216511	0.0496532	0.0420107	g50614/g60230/g29833	3	SMC
GO:0022625	cytosolic large ribosomal subunit	99/1124	228/60364	2.40616e-108	2.38932e-105	1.84641e-105	g43460/g39004/g2456/g4630/g333/g35016/g9018/g46617/g30524/g13931/g20236/g976/g1039/g4484/g58362/g35829/g5281/g57671/g43033/g48994/g20819/g34396/g5190/g30458/g25117/g44972/g31251/g1044/g5194/g5120/g13932/g11735/g15906/g23414/g10474/g53832/g19856/g11901/g25000/g25656/g10185/g55247/g860/g3831/g42543/g55302/g26463/g11925/g47269/g3801/g35034/g6113/g58177/g20707/g59468/g50532/g31564/g41685/g13478/g1573…	99	U_EC
GO:0009535	chloroplast thylakoid membrane	58/1124	115/60364	1.18712e-68	5.89403e-66	4.55477e-66	g29834/g5240/g35362/g37391/g9989/g9751/g37937/g7173/g37393/g24312/g34449/g61561/g43385/g59648/g55675/g9736/g58875/g59979/g1172/g13564/g42876/g34283/g31397/g58982/g54964/g54350/g37389/g34739/g280/g50581/g54779/g38044/g10027/g30155/g39208/g5445/g17905/g33901/g53349/g8948/g20248/g1822/g43775/g53218/g31185/g7161/g25672/g55047/g61055/g13792/g31194/g26780/g60170/g31548/g24713/g23740/g193/g10000	58	U_EC
GO:0015979	photosynthesis	55/1124	119/60364	2.12605e-62	7.03722e-60	5.43821e-60	g5240/g37391/g21557/g9751/g20149/g43774/g48926/g54429/g297/g7173/g58521/g37393/g34449/g54397/g43385/g53373/g29965/g9736/g58875/g59979/g1172/g50500/g13564/g20810/g42876/g34283/g31397/g58982/g54964/g54350/g37389/g45761/g34739/g20022/g280/g50581/g54779/g46227/g54082/g49009/g8948/g20248/g8923/g48682/g53218/g31185/g9721/g7161/g42791/g11485/g8934/g26780/g4398/g24713/g23740	55	U_EC
GO:0009536	plastid	77/1124	385/60364	5.12502e-55	1.27229e-52	9.83194e-53	g52527/g37391/g54359/g7125/g20149/g54429/g20358/g297/g21739/g21844/g17947/g37393/g61561/g43385/g24316/g58875/g59979/g1172/g13564/g20810/g34283/g31397/g54964/g54350/g37389/g45761/g34739/g280/g50581/g54779/g46227/g50425/g13324/g29906/g59505/g39208/g20458/g55622/g13403/g54885/g23668/g31185/g38237/g25672/g1106/g29616/g60789/g17181/g60863/g41630/g4398/g57145/g61617/g9483/g1477/g16874/g38300/g21704/g14…	77	U_EC
GO:0009523	photosystem II	37/1124	67/60364	3.18512e-46	6.32565e-44	4.88832e-44	g37391/g21557/g43774/g37393/g24312/g34449/g61561/g43385/g30850/g29965/g58875/g59979/g1172/g50500/g13564/g34283/g58982/g54964/g54350/g37389/g34739/g20022/g280/g50581/g54779/g54082/g8948/g20248/g53218/g31185/g13303/g9721/g42791/g25672/g26780/g24713/g23740	37	U_EC
GO:0022627	cytosolic small ribosomal subunit	37/1124	80/60364	2.18009e-42	3.60805e-40	2.78822e-40	g873/g62795/g5092/g59753/g51669/g3651/g42823/g61980/g1608/g2036/g5155/g11431/g48978/g55157/g43896/g3336/g9924/g10329/g25356/g11275/g9923/g9811/g11539/g22143/g50405/g11523/g35255/g50555/g9891/g50955/g13021/g22105/g47257/g12975/g3295/g12278/g21742	37	U_EC
GO:0009522	photosystem I	27/1124	39/60364	4.52482e-38	6.41878e-36	4.96029e-36	g5240/g37391/g9751/g20149/g48926/g7173/g37393/g43385/g9736/g58875/g59979/g13564/g20810/g34283/g31397/g54964/g54350/g37389/g45761/g34739/g280/g50581/g54779/g49009/g48682/g31185/g7161	27	U_EC
[truncated: 631 more rows]

## Sheet: Table S3E
Table S3E Genes responsive to SA, JA, ABA, defense, oxidative stress, and photosynthesis
[truncated: 1,134 more rows]

## Sheet: Table S3F
Table S3F NLRs in sweet potato genome
[truncated: 890 more rows]

[truncated: 1 more sheets: Table S3G]
