# Supplementary material for: Cell-type-specific response in host plants to the co-infection by sweet potato viruses
Source: Research Square preprint supplement (doi:10.21203/rs.3.rs-5025036/v1), 2024-09-20
Supplement: Supplementary file 7 [file Table_S4.xlsx]

## Sheet: Table S4A
Table S4A Differentially expressed gene in cluster 1 and 26
Gene_ID	avg_log2FC	p_val_adj		ID	Description	GeneRatio	BgRatio	pvalue	p.adjust	qvalue	geneID	Count
g51025	0.315203	4.61083e-14		GO:0009611	response to wounding	6/358	65/60364	2.56661e-06	0.00170166	0.00153186	g8373/g8413/g8416/g29758/g31288/g31186	6
g3975	0.263214	1.98074e-13		GO:2000022	regulation of jasmonic acid mediated signaling pathway	4/358	37/60364	6.88335e-05	0.0137362	0.0123655	g29758/g31288/g31186/g20374	4
g33984	2.17042	9.51966e-13		GO:0016655	oxidoreductase activity, acting on NAD(P)H, quinone or similar compound as acceptor	3/358	14/60364	7.17301e-05	0.0137362	0.0123655	g46341/g1822/g13219	3
g1258	0.294999	2.87512e-12		GO:0031492	nucleosomal DNA binding	3/358	15/60364	8.92683e-05	0.0137362	0.0123655	g405/g13164/g50217	3
g28943	0.285538	1.27587e-11		GO:0009909	regulation of flower development	4/358	41/60364	0.000103591	0.0137362	0.0123655	g50362/g1212/g30000/g16707	4
g56037	0.277712	4.35997e-11		GO:0016671	oxidoreductase activity, acting on a sulfur group of donors, disulfide as acceptor	3/358	24/60364	0.000381677	0.0421753	0.0379668	g59342/g25257/g24063	3
g30455	0.427349	7.00369e-11		GO:0004177	aminopeptidase activity	4/358	61/60364	0.000486296	0.0460592	0.0414632	g47115/g42469/g5018/g20590	4
g51024	0.273234	9.18223e-11
g50756	0.282042	1.17002e-10
g14632	0.26195	1.76085e-10
g16375	0.443913	1.8491e-10
g23233	0.385051	4.91152e-10
g24664	0.383771	5.53927e-10
g42780	0.323142	8.36062e-10
g2432	0.365036	9.19282e-10
g34139	0.319001	9.65477e-10
g37410	0.517176	1.03058e-09
g19275	0.30264	1.07366e-09
g17439	0.3815	1.10668e-09
g37657	0.423299	1.1333e-09
g28080	0.420613	1.1802e-09
g41668	0.263578	1.24236e-09
cox1	0.286212	1.4906e-09
g44482	0.297412	1.56454e-09
g25354	0.2576	1.74974e-09
g13931	0.282544	1.92478e-09
g22580	0.39018	1.97512e-09
g59164	0.271613	2.15221e-09
g13661	0.397332	2.17655e-09
g23939	0.281356	2.23807e-09
g25084	0.367968	2.48536e-09
g13529	0.291045	2.8133e-09
g9924	0.304051	2.8235e-09
g30408	0.290006	2.87791e-09
g12699	0.290263	4.23241e-09
g47688	0.322809	5.5214e-09
g61062	0.34322	5.85675e-09
g330	0.252373	6.0233e-09
g37631	0.393881	7.65599e-09
g29359	0.396448	8.76976e-09
g4739	0.352476	8.76983e-09
g39285	0.420424	9.13248e-09
g59781	0.327455	9.71806e-09
g33863	0.25921	9.95073e-09
g55060	0.563293	1.1069e-08
g9990	0.25192	1.16833e-08
g20605	0.384631	1.18745e-08
g50768	0.312025	1.22503e-08
g34007	0.382625	1.23265e-08
g30550	0.283133	1.2352e-08
g58344	0.579128	1.48518e-08
g13488	0.28045	1.54421e-08
g3299	0.316168	1.56834e-08
g32070	0.507434	1.60521e-08
g58317	0.352501	1.61177e-08
g42994	0.387631	1.81543e-08
g357	0.297403	1.94613e-08
g35172	0.371728	1.98283e-08
g23825	0.405012	2.03408e-08
g21708	0.281168	2.11523e-08
g5499	0.345041	2.1703e-08
g2062	0.369244	2.22171e-08
g49968	0.34582	2.2978e-08
g12511	0.376311	2.66688e-08
g38184	0.344939	2.75837e-08
g59946	0.418162	3.01335e-08
g11564	0.260229	3.1099e-08
g59622	0.345933	3.29611e-08
g4459	0.329048	3.482e-08
g13510	0.396883	3.53356e-08
g33257	0.258972	4.63744e-08
g29616	0.25406	4.73434e-08
g30640	0.250933	5.60096e-08
g58177	0.348408	5.63199e-08
g26616	0.357945	8.63163e-08
g56375	0.450206	8.68742e-08
g38187	0.428168	9.39349e-08
g27885	0.325932	9.50202e-08
g60746	0.385553	1.03847e-07
g20002	0.335316	1.05698e-07
g48041	0.463006	1.13844e-07
g41894	0.416	1.17989e-07
g35314	0.260173	1.20488e-07
g25732	0.262397	1.24013e-07
g14463	0.301552	1.33622e-07
g58484	0.373808	1.3873e-07
g60735	0.408705	1.40843e-07
g58754	0.317116	1.46739e-07
g20020	0.516607	1.50542e-07
g21727	0.317869	1.53177e-07
g38443	0.315679	1.76719e-07
g60821	0.318395	1.82529e-07
g31109	0.30733	1.87532e-07
g19658	0.361762	1.88546e-07
g26849	0.343626	1.95035e-07
g49009	0.363195	1.96181e-07
g59403	0.60528	2.02021e-07
g49614	0.361091	2.2202e-07
g3517	0.469683	2.2208e-07
g16700	0.465266	2.24362e-07
g13408	0.427428	2.70352e-07
g5479	0.461745	2.82832e-07
g13713	0.505018	2.98018e-07
g38065	0.341713	2.98277e-07
g31405	0.517301	3.00911e-07
g21646	0.426492	3.5512e-07
g56238	0.377601	3.67631e-07
g5789	0.33387	3.85881e-07
g25943	0.441023	3.87269e-07
g19751	0.366953	4.52001e-07
g13299	0.321912	4.55401e-07
g9715	0.37434	4.6868e-07
g25229	0.585687	4.94686e-07
g59975	0.2905	4.99111e-07
g27227	0.42519	5.12489e-07
g39167	0.345891	5.52486e-07
g41751	0.77761	5.65002e-07
g54602	0.557063	5.72745e-07
g59882	0.424263	5.77676e-07
g42657	0.351978	5.93431e-07
g20498	0.444999	6.0684e-07
g55076	0.269588	7.08653e-07
g25976	0.253946	7.24867e-07
g4794	0.337497	7.50048e-07
g29775	0.278183	8.26623e-07
g55236	0.379361	8.35959e-07
g54252	0.70597	9.63085e-07
g26957	0.266484	9.653e-07
g24700	0.418986	9.98644e-07
g55669	0.284633	1.02746e-06
g52522	0.548569	1.03542e-06
g13550	0.278279	1.04383e-06
g34307	0.324103	1.13458e-06
g7265	0.42049	1.14408e-06
g1620	0.598632	1.17026e-06
g24695	0.526986	1.24461e-06
g60974	0.290813	1.25817e-06
g25421	0.733854	1.39165e-06
g9430	0.722372	1.41811e-06
g56203	0.290531	1.42491e-06
g4464	0.362471	1.56869e-06
g13494	0.817074	1.61361e-06
g4484	0.405736	1.63964e-06
g54346	0.543608	1.7511e-06
g5757	0.501557	1.76296e-06
g25099	0.38213	1.7902e-06
g30458	0.318954	1.8137e-06
g11668	0.541809	1.86125e-06
g539	0.348546	1.93492e-06
g54616	0.510822	1.95343e-06
g31953	0.445963	2.04092e-06
g55039	0.633059	2.0573e-06
g30101	0.371962	2.21265e-06
g26136	0.302012	2.27012e-06
g29915	0.25573	2.29805e-06
g4924	0.398568	2.37452e-06
g9895	0.299303	2.49377e-06
g20359	0.426385	2.65006e-06
g14520	0.390742	2.69165e-06
g49063	0.272171	2.69677e-06
g34930	0.313766	2.70587e-06
g47257	0.341827	2.70968e-06
g9424	0.332438	2.7709e-06
g24278	0.288027	2.80632e-06
g21484	0.267923	2.80795e-06
g5092	0.368113	2.84327e-06
g60586	0.265791	3.05956e-06
g1207	0.317762	3.33568e-06
g59521	0.282362	3.63396e-06
g19709	0.454015	4.15315e-06
g28345	0.470983	4.20179e-06
g34039	0.548269	4.22318e-06
g55286	0.291124	4.22837e-06
g24548	0.505248	4.24579e-06
g35600	0.278659	4.4164e-06
g38309	0.357156	4.94006e-06
g3811	0.276184	4.95932e-06
g31345	0.41058	5.01406e-06
g59071	0.330521	5.14645e-06
g9708	0.345368	5.41948e-06
g24592	0.26112	5.42295e-06
g50912	0.483263	6.12079e-06
g37416	0.383338	6.2735e-06
g59388	0.341488	6.84193e-06
g59568	0.344748	6.9581e-06
g20390	0.359662	6.96697e-06
rps16	0.393944	6.99232e-06
g58640	0.566792	7.10303e-06
g23489	0.389919	7.13664e-06
g31453	0.265743	7.19066e-06
g282	0.410448	7.86248e-06
g59444	0.276353	8.33846e-06
g52130	0.644956	8.46394e-06
g8784	0.646061	8.49848e-06
g41750	0.441345	9.12478e-06
g13303	0.652281	9.38914e-06
g20404	0.539375	9.5288e-06
g31187	0.624049	1.012e-05
g13522	0.385501	1.04068e-05
g49369	0.451512	1.04515e-05
g43493	0.638235	1.12884e-05
g39572	0.279515	1.30525e-05
g30105	0.405255	1.31955e-05
g30603	0.285854	1.31971e-05
g59035	0.400089	1.32445e-05
g9483	0.413721	1.36884e-05
g9263	0.486359	1.37827e-05
g26514	0.376506	1.39392e-05
g29032	0.252577	1.48084e-05
g54805	0.455025	1.48682e-05
g16514	0.407475	1.59029e-05
g23055	0.441428	1.59128e-05
g54437	0.601279	1.65741e-05
g54898	0.299247	1.66609e-05
g51362	0.602326	1.68924e-05
g30995	0.345542	1.7426e-05
g50222	0.337457	1.84964e-05
g5500	0.279043	1.88308e-05
g4952	0.282728	1.91097e-05
g54465	0.564972	1.9837e-05
g43386	0.295669	2.07349e-05
g43240	0.273481	2.0769e-05
g46295	0.740517	2.07768e-05
g46329	0.272817	2.21069e-05
g51445	0.579867	2.2215e-05
g30155	0.341125	2.29229e-05
g48574	0.429301	2.30221e-05
g20351	0.397469	2.44103e-05
g1266	0.382466	2.48956e-05
g30222	0.400555	2.52812e-05
g48994	0.436709	2.55e-05
g60411	0.28082	2.64814e-05
g63395	0.627042	2.78594e-05
g29017	0.385394	2.91771e-05
g34255	0.547946	3.02199e-05
g9143	0.438548	3.07028e-05
g58187	0.565252	3.21572e-05
g3567	0.310404	3.21979e-05
g14702	0.329544	3.22726e-05
g9065	0.85628	3.26642e-05
g19466	0.493335	3.29343e-05
g14103	0.542093	3.31836e-05
g14077	0.468888	3.3267e-05
g29528	0.268733	3.40696e-05
g63918	0.699662	3.4985e-05
g43049	0.376879	3.52339e-05
g1609	0.409442	3.63206e-05
g20789	0.636036	3.71014e-05
g57831	0.532538	3.72202e-05
g41899	0.455518	3.72225e-05
g30123	0.483459	3.86961e-05
g56247	0.524996	4.21377e-05
g60044	0.492241	4.9845e-05
g12294	0.271292	5.13797e-05
g38705	0.744022	5.22218e-05
g51122	0.466574	5.45652e-05
g43575	0.445228	5.57101e-05
g42829	0.463175	5.58726e-05
g5155	0.275095	5.61142e-05
g137	0.324716	5.75785e-05
g42315	0.505416	5.93494e-05
g61218	0.428264	5.93886e-05
g58836	0.473608	6.08393e-05
g54841	0.519421	6.24671e-05
g58903	0.458612	6.39823e-05
g163	0.264334	6.42114e-05
g29404	0.740872	6.71546e-05
g34565	0.454525	7.70549e-05
g58775	0.543015	8.12276e-05
g3856	0.680672	8.25916e-05
g46301	0.311538	8.5544e-05
g24736	0.361912	8.58323e-05
g59490	0.504396	8.70186e-05
g1038	0.459659	8.72109e-05
g9921	0.51922	9.13555e-05
g24059	0.599854	9.23415e-05
g24631	0.731064	9.33972e-05
g60156	0.337121	9.92658e-05
g59670	0.326915	0.000100562
g20016	0.6777	0.000101114
g21444	0.311909	0.000102092
g49496	0.405246	0.000103655
g55664	0.529685	0.00010413
g26891	0.514243	0.000112692
g35438	0.291403	0.000112835
g50296	0.293657	0.000116688
g3668	0.500566	0.000118456
g34211	0.37263	0.000124893
g20467	0.264154	0.000129606
g33836	0.355971	0.000132306
g14677	0.46429	0.00013238
g54325	0.343812	0.000132964
g38836	0.325062	0.000139106
g432	0.496553	0.000142477
g50218	0.814921	0.000152667
g1212	0.506572	0.000161727
g59468	0.426649	0.00017279
g42725	0.721869	0.000173126
g33345	0.590645	0.000176104
g17703	0.317737	0.000182368
g20481	0.871703	0.000189301
g5119	0.406342	0.000193388
g58992	0.359346	0.000205618
rps3.c	0.310749	0.000205806
g35073	0.464538	0.000210341
g29043	0.526749	0.000213202
g3604	0.628333	0.000216318
g60	0.867843	0.000224618
g25621	0.782194	0.000225547
g46575	0.290723	0.000225793
g54780	0.653909	0.000227073
g1341	0.895944	0.000228781
g34361	0.421672	0.000233217
g43465	0.579456	0.000234362
g42544	0.424564	0.000237028
g1276	0.541329	0.000244901
g22464	0.320288	0.000247743
g45063	0.485929	0.000252037
g5449	0.395304	0.000253002
g35604	0.400991	0.000264331
g60409	0.374174	0.000269091
g56210	0.330854	0.000270248
g9360	0.470048	0.00027049
g30777	0.397009	0.000272202
g26780	0.394217	0.000273195
g20672	0.323924	0.000283448
g49612	0.449115	0.000288998
g58671	0.704464	0.000302553
g27551	0.88961	0.000303538
g31164	0.322793	0.000310962
g3990	0.574043	0.000312238
g33780	0.445873	0.00031427
g34320	0.572506	0.000326648
g33901	0.29223	0.000336841
g61457	0.549372	0.000346955
g55220	0.426834	0.00035049
g17830	0.501429	0.000351624
g57861	0.352225	0.000361071
g4683	0.3045	0.000371801
g989	0.56138	0.00037594
g8744	0.327383	0.000377234
g31659	0.631554	0.000379045
g58036	0.51223	0.000397111
g20788	0.696005	0.000402394
g27011	0.835555	0.000406279
g11688	0.36455	0.000406764
g53642	0.293819	0.000408169
g9000	0.261656	0.000427329
g8418	0.666712	0.000440538
g54833	0.561571	0.00044595
g19770	0.583653	0.000446526
g10534	0.307953	0.000449529
g30196	0.410303	0.000450924
g58768	0.596858	0.000456314
g22408	0.336761	0.000459337
g2433	0.549764	0.000493137
psbA	0.886941	0.000502539
g62620	0.373672	0.000521439
g11346	0.255516	0.000528174
g14521	0.390265	0.000538539
g61048	0.318721	0.000538684
g11788	0.503215	0.000547138
g56530	0.32553	0.000548541
g1040	0.429072	0.000555365
g20733	0.338587	0.000558461
g30843	0.749587	0.000561629
g43735	1.09885	0.00056438
g41741	0.705053	0.000573548
ihbA	0.579817	0.000580186
g42729	0.746004	0.000590702
g16805	0.261903	0.00059273
g44128	0.351964	0.000649409
g50425	0.358998	0.000661057
g10452	0.547647	0.000661691
g10264	0.321226	0.000678686
g30138	0.313147	0.000691924
g34019	0.544551	0.000694455
g35194	0.816904	0.000697037
g43775	0.446078	0.000697909
g55353	0.459816	0.000701185
g42660	0.457903	0.000705293
g23987	0.749329	0.000707773
rpl14	0.400985	0.0007297
g20590	0.462589	0.000758273
g62112	0.3042	0.00076244
g54430	0.287032	0.000765759
g19459	0.557717	0.000773248
g50214	0.466037	0.000789469
g12467	0.376313	0.000794515
g29378	0.309112	0.000816889
g12837	0.583095	0.000826538
g10504	0.713086	0.000829865
g25417	0.378567	0.000835663
g43900	0.507376	0.000868438
g13352	0.320747	0.000890798
g8255	0.319556	0.000901889
rpl33	0.635891	0.000905733
g54643	0.437798	0.000906762
g29134	0.42736	0.000918569
g1108	0.581098	0.00092008
g38948	0.394071	0.000944406
g58655	0.39321	0.000973981
g14255	0.709041	0.000977115
g649	0.382427	0.000985509
g20603	0.669485	0.00107691
g13128	0.656233	0.00113381
g24501	0.399118	0.00113656
g5440	0.66862	0.00114721
g60863	0.589339	0.00123969
g22260	0.485636	0.00125622
g29927	0.325294	0.00129328
g42441	0.349541	0.00132202
g35290	0.724287	0.00134857
g31490	0.255082	0.00136916
g50548	0.850153	0.00138068
g54034	0.266656	0.00138142
g35063	0.562419	0.00145258
g55296	0.261218	0.00146511
g9416	0.407514	0.00148032
g51243	0.362571	0.00155078
g4285	0.494205	0.00160162
g13219	0.270841	0.00163277
g42000	0.502468	0.00165204
g8297	0.353555	0.0016687
g8927	0.279681	0.00169746
g42961	0.489518	0.00172562
g5820	0.432144	0.00179189
g35004	0.407458	0.00181411
g3692	0.458441	0.00182418
g35227	1.09251	0.00185029
g45829	0.510312	0.00194281
g10027	0.497051	0.00199382
g20825	0.861729	0.00199411
g53369	0.377361	0.00206088
g17107	0.654802	0.00209945
g17181	0.369846	0.00210475
g40897	0.475229	0.00218838
g25156	0.375849	0.00224619
g49843	0.631349	0.00229017
g53704	0.449197	0.00234288
g46355	0.322384	0.00238565
g46357	0.348537	0.00238973
g44940	0.728166	0.00239607
g463	0.645875	0.00240878
g41630	0.403786	0.00249352
g25580	0.43332	0.00249866
g9721	0.745654	0.00251028
g54978	0.60375	0.00263113
g53259	0.337608	0.00263386
g7251	0.736525	0.00284409
g45799	0.41737	0.00300395
atpH	0.594675	0.00304645
g19670	0.582201	0.00305334
g61812	0.292137	0.00309633
g50814	0.435779	0.00319002
g25077	0.271351	0.00320966
g48094	0.326525	0.00326973
g9561	0.837105	0.00329841
g10974	0.611454	0.00340424
g47107	0.348261	0.00341712
g9884	0.774392	0.00349397
g58781	0.525725	0.00352231
g26962	0.402487	0.00363392
g26012	0.29372	0.00386017
g27003	0.526601	0.00391998
g47096	0.350063	0.00396139
g30551	0.647436	0.00405987
g19666	0.316662	0.00412175
g42642	0.299115	0.00427796
g47680	0.3235	0.00436425
g26761	0.73428	0.00447275
g47077	0.73682	0.0044769
g24257	0.658952	0.00453775
g38860	0.573351	0.00459062
g54885	0.422344	0.00463296
g44416	0.656419	0.00482789
g17016	0.298282	0.00491726
g59817	0.706794	0.00494747
g48288	0.38329	0.00497802
g9817	0.762585	0.00498367
g9963	0.604552	0.00501431
g3941	0.726923	0.00517416
g16821	0.477467	0.00523099
petD	0.770648	0.00529199
g41965	0.580138	0.00532514
g1206	0.567491	0.00537795
g17437	0.40902	0.00552452
g50247	0.578061	0.00560837
g29334	0.581081	0.0056605
g8899	0.695302	0.00567186
g34901	0.466087	0.00569997
g21016	0.444181	0.00584051
g61557	0.362538	0.00590664
g7689	0.566927	0.00595105
g60978	0.470192	0.00605714
g41950	0.692715	0.006227
g31856	0.334348	0.00625024
g34079	0.656122	0.00634054
g33877	0.698805	0.00662413
g55622	0.571795	0.00678969
g4551	0.411506	0.00683735
g20702	0.404342	0.00687905
g48576	0.456213	0.00706165
g55715	0.28692	0.00711182
g57381	0.987109	0.00713329
g8787	0.835943	0.00721994
g58990	0.432231	0.00724224
g38185	0.672817	0.00747935
g1863	0.458609	0.00774489
g30153	0.813191	0.00777146
g12814	0.448735	0.00778405
g34477	0.564778	0.00790314
g46564	0.269533	0.00799511
g40432	0.735339	0.00804576
g30015	0.780281	0.00808418
g31098	0.80815	0.0081364
g60543	0.340106	0.00815888
g10163	0.625882	0.00816215
g42779	0.533938	0.0086429
g35477	0.920983	0.00873147
g17206	0.502319	0.00890812
g60536	0.574229	0.00905945
g13165	0.849838	0.00912996
g53015	0.841763	0.0094765
g13724	0.470893	0.00951805
g60710	0.502286	0.00972486
g10728	0.578085	0.00980145
g34185	0.791324	0.0098183
g34566	0.25963	0.0100351
g50232	0.569318	0.0100836
g58605	0.302655	0.0101659
g13549	0.666925	0.0103391
g35023	0.740703	0.0105938
g13278	0.706531	0.0106221
g4501	0.488796	0.0108586
g1264	0.662451	0.0109167
g29087	0.665191	0.0111232
g29122	0.439375	0.0114064
g38049	0.487455	0.0122377
g8183	1.07194	0.0122764
g16942	0.300407	0.0124268
g28548	0.455713	0.0125476
g35037	0.55335	0.0126858
g11405	0.827326	0.0137098
g43774	0.260872	0.0140346
g42084	0.319356	0.0142389
g56359	0.485679	0.0144821
g51370	0.908142	0.0146499
g55146	0.388156	0.014851
g34073	0.524236	0.015098
g59564	0.44893	0.0153179
g7690	0.313593	0.0155496
g55047	0.607487	0.0158851
g5577	0.574527	0.0170131
g25223	2.43022	0.0170462
g44968	0.665581	0.0173679
g9243	0.549493	0.0174402
g9137	0.458632	0.0178007
g901	0.604146	0.0179429
g32025	0.562652	0.0184743
g58762	0.542364	0.0190632
g34308	0.860442	0.0195033
g3602	0.60071	0.0196461
g13298	0.459249	0.0196751
g60235	0.330215	0.0203304
g24658	0.403519	0.0204076
g3665	0.784457	0.0213354
g5267	0.322613	0.0219543
g43893	0.530978	0.0222714
g988	0.42963	0.0222822
g60170	0.373215	0.0225342
g41799	0.440955	0.0235983
g53349	0.447544	0.0239399
g13183	0.579314	0.0239998
g34380	0.266298	0.0246249
g55099	0.886492	0.0246592
g8253	0.302646	0.0251369
g51420	0.72529	0.0253462
g31104	0.498296	0.0257015
g25083	0.413674	0.0258929
g55222	0.749598	0.0261561
g21510	0.522387	0.0274524
g41083	0.484581	0.0274851
g31185	0.768043	0.0276961
g12267	0.785447	0.0279136
g25437	0.272209	0.0281279
g54710	0.641871	0.028268
g25537	0.483416	0.0290863
g16771	0.635036	0.0304673
g29362	0.491136	0.0305456
g43328	0.54986	0.0305568
g59162	0.618938	0.0309128
g53721	0.560772	0.0309838
g8747	0.336284	0.0315149
g400	0.521577	0.0324027
g61056	0.728386	0.0329945
g12376	0.26278	0.0333412
g13992	0.878977	0.0341991
g61034	0.409103	0.0345344
g38835	0.411195	0.0346232
g42575	1.14498	0.0353432
g8699	0.711985	0.0374755
g24401	0.736557	0.0391107
g5558	0.49377	0.0397487
g4707	1.12833	0.0399097
g63677	0.279341	0.0420873
g54315	0.259362	0.0421695
g60929	0.891849	0.0434296
g35135	0.786881	0.0438174
psbE	0.564289	0.0444221
g25672	0.650868	0.0445144
g370	0.951106	0.0458062
g17415	0.467373	0.0465449
g46257	0.663957	0.0467609
g52228	0.361403	0.0475738
g14570	0.862479	0.0502207
sdh4	0.626839	0.0509498
g57015	0.620441	0.0512713
g38032	1.19371	0.0535245
g45846	0.478571	0.0541132
g60246	0.751594	0.0550484
g11686	0.50745	0.0566527
g49445	0.932772	0.0587479
g12819	0.919114	0.0611115
g43150	0.431694	0.0616334
g17392	0.467534	0.0629294
g62095	0.5877	0.068857
g1328	0.343311	0.0710327
g43952	0.396496	0.0720565
g20189	0.343102	0.0721352
g60854	0.427791	0.078297
g21290	0.715105	0.0839281
nad1	0.688219	0.0882991
g23468	0.994974	0.103227
g59328	0.41517	0.10566
g50488	0.522931	0.111999
g20458	0.397646	0.113398
g51070	0.25346	0.11375
g42837	0.363127	0.114307
g24949	0.70497	0.115624
g54751	0.381244	0.115677
g33567	0.744278	0.119803
g38327	0.742008	0.123436
g8294	1.01172	0.124268
g47769	1.29423	0.127136
g19337	0.92006	0.129493
g1275	0.763743	0.129736
g9821	0.753549	0.131073
g20248	0.697238	0.132827
g54791	0.559551	0.134079
rpoB	0.782728	0.138782
g14515	0.441523	0.142315
g50405	0.343479	0.142564
g47	0.617825	0.153759
g55198	0.509123	0.159909
g18625	0.714337	0.160169
g25656	0.348641	0.162258
g43076	0.459509	0.167647
g55677	0.918806	0.169582
g7641	0.664714	0.173744
g38706	0.353562	0.177875
g47892	1.04164	0.178575
g3803	0.320044	0.180232
g56225	0.548214	0.184959
g525	0.810901	0.193111
g3987	0.424916	0.194144
g26218	0.332135	0.207065
g38485	0.822445	0.208299
g60065	1.04821	0.212379
g21576	0.875711	0.213053
g30417	0.935196	0.215805
g38277	0.845956	0.216539
g993	0.593911	0.221619
g876	0.855649	0.22189
g17223	0.836812	0.232
g42490	0.709664	0.232041
g59929	0.654142	0.236706
g5161	0.809639	0.257346
g50288	0.800132	0.260778
g25611	0.38645	0.261896
g9641	0.773196	0.268722
g25019	0.968409	0.270312
g12843	0.579148	0.299291
g38294	0.543028	0.304008
rps4.c	0.651238	0.312277
g966	0.326657	0.315274
g20968	0.490769	0.316101
g61239	0.25226	0.321315
g24713	0.34128	0.323116
g60507	1.02726	0.324048
g34949	0.995082	0.341352
g765	0.694362	0.358235
g17803	0.454463	0.361426
g13518	0.331098	0.40774
g8743	0.635169	0.41066
g60765	0.723431	0.436291
g25317	1.01664	0.442913
g25466	0.291307	0.460286
g8995	1.05809	0.470811
g5274	0.979118	0.505512
g31194	0.765323	0.525968
g46504	1.16775	0.537054
g47332	0.735984	0.55982
g21279	1.08202	0.583709
g31091	0.647478	0.606298
g62593	0.665324	0.612787
g16912	1.05059	0.659685
g9503	1.45644	0.689102
g10474	0.253274	0.762867
g53745	1.01868	0.824237
g4398	1.04569	0.888487
g12302	0.564288	0.914188
g3899	0.471081	0.955632
g25157	0.552568	0.99722
g9989	0.269713	1
g4740	0.783019	1
rrnS	1.64416	1
g9811	0.317632	1
g23740	1.00455	1
g4591	1.1167	1
g21739	0.573593	1
g42751	0.600104	1
g54397	0.311423	1
g33782	1.10996	1
g8831	0.531974	1
g34710	0.910534	1
g28261	0.842792	1
g42579	0.305672	1
g32733	0.939409	1
g49936	0.484565	1
g39208	0.666529	1
g33945	0.899113	1
g43665	0.829169	1
g4086	0.806251	1
g37880	0.907032	1
g32564	0.771099	1
g38995	0.638213	1
rps2	0.745825	1
g42717	1.03713	1
g35340	0.444207	1
g60257	0.286503	1
g35220	0.9833	1
petB	0.437562	1
g51318	1.22279	1
g9194	0.342517	1
g45409	0.551833	1
g21675	1.14177	1
g24370	0.306783	1
g59751	0.489451	1
g62735	1.02772	1
g58521	0.412797	1
g30317	0.972604	1
g4477	1.36264	1
g19971	0.994137	1
g17468	0.750828	1
g12263	0.46116	1
g56520	1.5613	1
g34287	0.952983	1
g21513	0.571366	1
g46568	0.262805	1
g252	0.474457	1
g50447	0.343294	1
atpI	1.30307	1
psbC	0.433476	1
g54002	0.251932	1
g33985	1.32488	1
g23739	0.738801	1
psbD	0.829382	1
g7958	0.415128	1
g44972	0.34522	1
g333	0.553636	1
g16958	0.316161	1
g34449	0.284167	1
g16925	0.467298	1
rpl16.c	0.333584	1
psaA	0.895523	1
matK	0.274441	1

## Sheet: Table S4B
Table S4B Number of SPLCV infected cell and uninfected cells
Cell_type	JHY_uninfected	VF_JHY	JHY_infected	Percentage
PMC	5021	9222	4451	0.238098
SMC	2227	3187	1373	0.202299
U_EC	1079	2758	799	0.172347
L_EC	947	2061	767	0.203179
GC	459	480	234	0.199488
VC	470	1929	207	0.0794321

## Sheet: Table S4C
Table S4D GO enrichment analysis of cell type-speficic DEGs (Infected cell vs uninfected cells)																	Table S4C DEGs found in the PMC, EC, GC, and VC
PMC	gene	avg_log2FC	p_val_adj		SMC	gene	avg_log2FC	p_val_adj		L_EC	gene	avg_log2FC	p_val_adj		U_EC	gene	avg_log2FC	p_val_adj		EC	gene	avg_log2FC	p_val_adj		GC	gene	avg_log2FC	p_val_adj		VC	gene	avg_log2FC	p_val_adj
	g18461	2.14424	2.82971e-94			g54634	3.16421	3.57693e-156			g4174	7.41967	0			g53412	5.73543	0			g50125	7.89984	1.59643e-195			g59252	10.0565	1.34397e-290			g34378	7.29798	2.61648e-171
	g53926	2.08025	6.11226e-133			g37800	3.15325	5.9172e-70			g25081	5.79066	0			g50125	5.65833	0			g44995	7.71467	0			g20400	10.0295	0			g39702	6.91326	8.57123e-214
	g29756	1.98746	5.12103e-119			g51895	2.92678	2.52921e-141			g9928	5.57178	0			g59966	5.54678	0			g53646	7.59688	1.38914e-193			g24553	9.58626	5.40915e-302			g59683	6.65311	1.73526e-67
	g1705	1.94079	3.03581e-97			g50932	2.90989	1.80954e-97			g4084	5.4845	0			g38693	5.45067	0			g33477	7.31013	0			g39671	9.43682	0			g37036	6.25456	1.06258e-219
	g42791	1.90424	3.76528e-145			g1913	2.87856	3.37688e-113			g59796	5.17142	0			g59337	5.39166	0			g4587	7.14465	0			g24497	9.41613	0			g13977	5.52221	1.13965e-94
	g25466	1.90299	3.26385e-119			g13125	2.77577	1.51096e-122			g50319	4.52863	0			g33477	5.32559	0			g25665	7.12549	0			g60097	9.32787	0			g31380	5.4755	1.68206e-89
	g52268	1.89633	7.74999e-105			g14044	2.67284	2.5404e-95			g4923	4.42687	0			g46060	5.15316	0			g59107	6.84329	7.3299e-207			g31157	9.26929	0			g47685	5.30929	4.07805e-131
	g61617	1.89377	7.10919e-112			g1912	2.62496	1.46472e-107			g1019	4.41501	0			g13174	5.10668	0			g20271	6.81307	0			g35344	9.23437	0			g43253	5.21977	8.4027e-137
	g34533	1.89159	7.5924e-134			g34101	2.60534	1.09013e-278			g863	4.23196	0			g29615	5.09465	0			g46060	6.81077	9.3287e-303			g14823	8.98922	0			g20857	5.05875	1.13606e-88
	g34739	1.88301	0			g1904	2.6043	2.06957e-95			g58904	4.09455	0			g13217	5.02749	0			g44927	6.7803	0			g4701	8.78914	0			g29347	4.89908	5.12528e-83
	g24048	1.87337	7.62573e-63			g14301	2.59745	1.25414e-79			g29342	4.07364	0			g59971	4.91947	0			g29269	6.72211	0			g535	8.68249	0			g60009	4.70715	2.79997e-69
	g17749	1.87286	2.27286e-145			g59195	2.53918	1.30837e-95			g15930	3.87814	0			g20271	4.8848	0			g30407	6.70561	0			g44395	8.61807	0			g7663	4.66969	9.88496e-34
	g29965	1.83417	0			g818	2.49951	1.75677e-118			g62126	3.7946	0			g1049	4.78358	0			g43289	6.6984	2.49946e-271			g9196	8.50943	0			g61064	4.64212	2.55441e-27
	g54964	1.82452	0			g42538	2.40434	7.17264e-96			g25825	3.78723	0			g14572	4.77796	0			g59277	6.51287	0			g24558	8.48983	5.79135e-262			g25135	4.55087	6.52552e-99
	g13711	1.82192	2.96526e-123			g30167	2.40363	1.67256e-155			g63913	3.72868	0			g54917	4.75367	0			g41061	6.49066	0			g43072	8.36267	0			g8241	4.53335	9.5578e-58
	g7995	1.81721	0			g30633	2.38144	3.58272e-125			g29557	3.62735	0			g53446	4.70096	0			g30405	6.4032	2.68619e-301			g39374	8.2726	0			g17531	4.50804	2.84654e-86
	g8432	1.81646	1.84701e-233			g25778	2.36096	1.03428e-98			g1311	3.6204	0			g291	4.69652	0			g46641	6.3454	0			g54425	8.23153	0			g2024	4.37453	5.61665e-48
	g32176	1.81271	6.60261e-280			g26241	2.35902	1.10021e-133			g4525	3.60801	0			g46102	4.68358	0			g12959	6.33126	8.65528e-193			g20712	8.16305	0			g5504	4.25373	9.87514e-112
	g7889	1.81205	9.85859e-85			g46358	2.35025	1.60154e-176			g31588	3.59069	0			g38704	4.68261	0			g13159	6.2688	0			g39600	8.14656	2.20789e-235			g44293	3.99972	3.85718e-78
	g54082	1.80958	2.02889e-288			g17408	2.33924	6.22656e-134			g23947	3.58303	0			g30405	4.67728	0			g46102	6.25322	0			g45357	8.07475	0			g803	3.79112	2.46463e-31
	g36358	1.80943	2.09454e-180			g37469	2.32304	6.34246e-142			g50236	3.52714	0			g59074	4.65764	0			g33468	6.2204	0			g34706	8.04147	0			g26728	3.69815	2.31494e-21
	g24994	1.80638	1.52487e-168			g26145	2.31689	1.84208e-110			g29094	3.52607	0			g43289	4.62954	0			g29224	6.20285	0			g53553	8.01647	2.30873e-249			g9714	3.46758	9.59203e-48
	g54075	1.80631	9.37849e-76			g60176	2.24359	3.07147e-166			g306	3.50961	0			g46641	4.62465	0			g54917	6.11759	0			g39690	8.00531	0			g9480	3.39243	1.05298e-18
	g43386	1.80041	2.83346e-222			g29195	2.23971	5.09496e-183			g43587	3.45566	0			g41061	4.5991	0			g4376	6.08843	3.49431e-237			g35831	7.968	0			g46866	3.27734	2.98062e-39
	g26218	1.7995	1.04628e-107			g30173	2.23325	1.39191e-86			g29529	3.42011	0			g56289	4.59227	0			g24585	6.01598	0			g50322	7.92149	0			g43286	3.15649	1.9394e-20
	g7950	1.79809	0			g1899	2.2261	3.00718e-32			g23211	3.40677	0			g34469	4.57095	0			g38693	5.99498	1.15798e-250			g25709	7.9095	0			g42317	3.10475	1.07574e-21
	g1822	1.7973	3.2161e-176			g46884	2.19348	1.27279e-47			g58144	3.40309	0			g43274	4.55334	0			g5237	5.9556	0			g11768	7.87789	2.4174e-241			g24270	3.03534	9.51344e-21
	g297	1.79615	1.21346e-291			g43425	2.18123	1.51396e-70			g61120	3.40219	0			g59107	4.50987	0			g8424	5.95094	2.85855e-233			g42014	7.87596	0			g46279	3.01854	3.98018e-17
	g8948	1.78953	2.21623e-225			g41866	2.16488	1.46815e-98			g51085	3.37249	0			g13159	4.50459	0			g24605	5.91658	5.64599e-270			g3984	7.86403	0			g54953	2.99021	1.12584e-41
	g24655	1.78921	1.35613e-154			g41957	2.12755	1.64187e-175			g42999	3.36418	0			g29657	4.50077	0			g34294	5.90287	1.37287e-191			g37764	7.75496	0			g16326	2.97258	9.48342e-40
	g38334	1.78522	0			g11398	2.10977	6.99863e-94			g36569	3.36301	9.75861e-213			g24605	4.50027	0			g34469	5.88894	8.70362e-235			g37804	7.7079	0			g20497	2.95449	2.79606e-45
	g41282	1.78238	1.5136e-61			g57931	2.10839	7.51473e-82			g34294	3.36016	0			g30826	4.49328	0			g5401	5.84889	0			g24448	7.6716	0			g58960	2.94048	1.2313e-45
	g32562	1.78197	9.96556e-64			g10719	2.10001	5.17208e-92			g20840	3.31105	0			g17364	4.4355	0			g17365	5.84631	0			g42767	7.62276	0			g58913	2.92342	5.89275e-18
	g4159	1.78196	1.92886e-160			g9397	2.09653	5.0377e-152			g46372	3.30425	0			g53820	4.43113	0			g60792	5.79604	0			g24561	7.59077	3.1598e-300			g59329	2.81665	1.83808e-14
	g20614	1.78081	1.86562e-116			g43743	2.08829	1.42386e-60			g16965	3.26838	0			g12068	4.4227	0			g43387	5.76292	0			g52784	7.58471	0			g11808	2.73518	6.25338e-29
	g37393	1.77485	0			g59315	2.08344	1.96955e-65			g54703	3.26331	0			g56072	4.40623	0			g1296	5.75089	0			g4711	7.57383	3.06523e-247			g59839	2.70429	2.70879e-18
	g19902	1.77231	4.33077e-106			g41820	2.06852	2.1992e-120			g24081	3.23308	0			g63332	4.39833	0			g17364	5.74285	0			g39912	7.53171	6.55083e-211			g55106	2.70373	7.69119e-26
	g27199	1.77215	2.14666e-212			g35209	2.05823	2.86751e-94			g43584	3.21955	1.9388e-298			g53646	4.34427	0			g54762	5.73192	0			g24467	7.5289	0			g8996	2.68303	5.77811e-25
	g49933	1.76728	0			g9185	2.05111	1.90469e-168			g37181	3.21013	0			g30827	4.30368	0			g24081	5.70101	0			g24556	7.49961	4.11866e-250			g25134	2.65704	3.40395e-40
	g38154	1.76718	6.77221e-116			g61413	2.04546	4.58493e-90			g29743	3.19966	0			g54419	4.22754	0			g4104	5.67342	0			g13498	7.47478	1.47571e-232			g14285	2.6478	0.00107019
	g20149	1.76672	6.17655e-289			g60590	2.02777	2.95685e-77			g60470	3.19409	0			g26049	4.20605	0			g43274	5.6666	0			g25994	7.42498	0			g17338	2.62699	8.61827e-20
	g14093	1.76629	1.30153e-189			g42819	2.01558	2.50596e-77			g41706	3.18943	0			g4589	4.20145	0			g30918	5.6662	0			g38212	7.39277	0			g29841	2.54441	2.26645e-22
	g53244	1.76574	0			g31540	1.99272	4.70631e-238			g25665	3.18193	0			g55052	4.18487	0			g62273	5.58426	0			g13848	7.37856	0			g29998	2.53457	4.26224e-09
	g17481	1.76431	1.14575e-114			g4806	1.9846	1.94657e-65			g46570	3.17087	0			g19074	4.18031	0			g31588	5.57844	0			g6637	7.28939	0			g27551	2.51188	0.00400191
	g59979	1.76284	0			g29758	1.98307	2.18656e-131			g3281	3.14865	6.22031e-251			g43645	4.16847	0			g59120	5.54174	0			g34462	7.28094	0			g60616	2.46089	4.89193e-10
	g59719	1.7583	0			g62109	1.97286	2.48985e-50			g43348	3.13874	0			g24585	4.16167	0			g30826	5.52097	0			g43453	7.23176	0			g2195	2.42652	4.82614e-14
	g13945	1.75778	1.97831e-81			g12354	1.95234	1.53387e-121			g25461	3.10945	3.94538e-244			g42677	4.13584	0			g54116	5.50344	1.11174e-245			g58835	7.22508	0			g23751	2.35913	1.27016e-14
	g6549	1.75577	2.43635e-59			g24908	1.93555	3.57231e-71			g8902	3.08948	0			g17365	4.13583	0			g30827	5.50265	1.01083e-189			g916	7.18682	0			g54376	2.32618	2.66247e-14
	g45761	1.75253	0			g20847	1.92477	2.58007e-191			g29668	3.07385	1.97011e-280			g12959	4.13108	0			g50365	5.47526	4.39519e-229			g39166	7.13547	0			g43136	2.29597	1.42576e-16
	g54681	1.74973	1.89485e-168			g46237	1.92381	2.50885e-163			g54654	3.06984	0			g1310	4.12461	0			g1049	5.47443	0			g34479	7.13506	0			g39206	2.25246	6.26615e-31
	g280	1.74922	0			g42088	1.92171	5.52104e-83			g53606	3.0621	0			g35432	4.12204	0			g41964	5.44486	2.84682e-228			g59319	7.13375	0			g47776	2.21293	1.77921e-17
	g7125	1.74866	0			g12081	1.91011	1.79274e-66			g24584	3.05928	0			g60291	4.06896	0			g4986	5.41336	2.15104e-237			g9481	7.05777	0			g1124	2.17142	3.29598e-09
	g3164	1.74828	4.57291e-66			g59417	1.90389	5.29311e-232			g59143	3.04635	3.27682e-280			g29104	4.06697	0			g4400	5.39311	0			g15343	7.02689	7.90313e-217			g48449	2.15551	1.18051e-05
	g34283	1.74722	0			g25528	1.89729	9.60501e-104			g4500	3.03775	0			g367	4.05373	0			g29104	5.38829	0			g59570	7.02384	0			g3854	2.14266	1.93839e-06
	g50214	1.74673	1.17198e-220			g10724	1.86869	3.07167e-67			g23525	3.03532	0			g58234	4.03758	0			g25578	5.37673	5.93605e-248			g60059	7.01602	0			g58645	2.11819	2.08209e-18
	g52791	1.74105	2.05446e-65			g49301	1.85431	8.82472e-50			g46829	3.03089	0			g20658	4.01876	0			g43762	5.3722	2.73225e-209			g4515	6.97928	0			g58380	2.09566	1.58945e-13
	g3803	1.7384	0			g34489	1.85197	2.9753e-117			g59097	3.02484	0			g56073	4.00091	0			g59796	5.30967	2.77404e-156			g23761	6.94307	0			g29044	2.09273	1.09894e-19
	g9751	1.7334	0			g28936	1.83074	8.88319e-63			g25458	3.01021	0			g56070	3.99714	0			g31426	5.2954	1.07034e-224			g37119	6.93142	0			g41751	2.08602	5.27905e-07
	g43385	1.7324	0			g54850	1.82171	1.07194e-79			g39368	3.00722	0			g4376	3.99241	0			g37350	5.28244	0			g4718	6.92089	0			g58953	2.07515	1.13432e-13
	g58240	1.73156	1.50338e-181			g4538	1.81872	2.92813e-129			g35170	3.00043	0			g56094	3.98257	0			g4547	5.28102	0			g59610	6.90626	4.59498e-226			g34955	2.07457	3.07918e-17
	g49608	1.73136	2.55654e-233			g685	1.7823	6.44266e-154			g52724	2.98811	0			g33468	3.98255	0			g9080	5.27749	1.1961e-210			g24491	6.90198	0			g34404	2.0647	0.000107736
	g58875	1.73111	0			g43243	1.77904	2.83745e-45			g43080	2.97963	7.42454e-249			g13819	3.96327	0			g13670	5.27535	0			g9050	6.89807	0			g44152	2.06351	6.92471e-19
	g53349	1.72287	4.2069e-198			g24776	1.77616	3.63746e-166			g41949	2.97756	1.15445e-248			g58189	3.96258	0			g26388	5.26445	6.53052e-216			g87	6.85067	0			g26145	2.03481	1.91284e-18
	g14824	1.72287	4.69126e-159			g24347	1.77345	8.83955e-71			g17546	2.95876	0			g5401	3.95432	0			g54419	5.26146	0			g39599	6.8414	0			g50612	2.03445	4.50331e-06
	g23981	1.71659	7.85226e-171			g28394	1.77151	3.99686e-150			g25207	2.95268	1.57151e-277			g57587	3.9529	0			g40084	5.24912	1.75045e-173			g24167	6.83436	1.53549e-231			g38015	2.03265	0.000359502
	g58982	1.71467	0			g55151	1.7688	9.22597e-57			g60021	2.94622	8.25209e-291			g34254	3.92553	0			g9272	5.2441	0			g29340	6.82506	0			g55181	2.02243	1.46095e-09
	g333	1.71177	0			g55618	1.76716	9.88807e-113			g43560	2.94458	0			g23918	3.90503	0			g13174	5.21412	0			g13251	6.81036	0			g60046	2.00439	1.71771e-16
	g42071	1.71171	1.47281e-130			g25701	1.75609	4.41127e-62			g12449	2.94451	0			g4986	3.87763	0			g57587	5.20207	0			g38962	6.79106	0			g26241	1.99869	9.4119e-14
	g31194	1.7025	7.2985e-127			g9996	1.73997	6.47737e-94			g39206	2.93799	3.48832e-301			g44995	3.85697	0			g42677	5.17638	7.23179e-161			g59049	6.78333	0			g34592	1.9661	2.60569e-19
	g52761	1.70236	2.89327e-183			g46679	1.7242	5.50655e-66			g20365	2.91671	0			g42818	3.85677	0			g59971	5.17028	0			g49313	6.77404	1.54309e-273			g29122	1.95907	2.00755e-13
	g7958	1.70025	0			g54281	1.71163	1.35368e-31			g30045	2.9165	0			g30601	3.85614	0			g56072	5.15177	1.09796e-206			g24424	6.72721	0			g5007	1.92841	5.90562e-11
	g13219	1.69711	2.28979e-208			g29047	1.69861	3.6435e-121			g26214	2.90793	0			g17339	3.84255	0			g54875	5.15109	0			g59607	6.70135	1.19088e-244			g53417	1.91743	9.46661e-09
	g62201	1.697	1.04504e-130			g31465	1.69592	4.25697e-88			g62273	2.90569	0			g39980	3.83532	0			g26214	5.13055	0			g9730	6.689	5.76443e-281			g18764	1.8981	2.80094e-06
	g49871	1.6963	0			g25531	1.68261	1.87846e-56			g4284	2.90163	0			g9396	3.8244	0			g42104	5.11838	0			g12311	6.66706	0			g26017	1.88676	0.164081
	g37389	1.69628	0			g5251	1.67968	1.75119e-82			g22508	2.88896	0			g375	3.78614	0			g53446	5.11691	0			g25644	6.6357	6.78614e-300			g13253	1.87498	0.0692698
	g25992	1.6962	9.08158e-192			g20374	1.65432	3.21294e-86			g1029	2.88037	0			g719	3.78426	0			g41706	5.08834	0			g5455	6.63538	0			g9017	1.87278	0.000407638
	g17459	1.69596	1.40245e-237			g13273	1.64641	8.59832e-57			g38656	2.87402	0			g29815	3.78179	0			g17339	5.08369	0			g13638	6.61749	0			g337	1.86884	0.000776156
	g12245	1.6957	5.14653e-78			g38553	1.64571	1.19382e-62			g40084	2.86194	3.48614e-261			g30407	3.7754	0			g24584	5.07682	0			g5572	6.60308	0			g30547	1.83201	7.3779e-09
	g38436	1.69493	2.089e-160			g36877	1.6407	8.75598e-96			g43387	2.85918	0			g30916	3.77098	0			g19673	5.03145	0			g20035	6.54664	2.99963e-293			g9931	1.82421	7.61327e-06
	g60730	1.6935	0			g29011	1.62992	4.41725e-56			g33844	2.85904	0			g292	3.76737	0			g291	5.01529	8.04505e-235			g12822	6.53856	0			g38359	1.80637	1.74545e-14
	g9736	1.69245	0			g9452	1.62313	4.40233e-53			g58508	2.85638	1.0397e-194			g47164	3.76242	0			g23918	5.0121	2.07505e-224			g39605	6.53106	0			g55286	1.80261	7.08866e-06
	g5445	1.68986	2.57959e-218			g31464	1.6206	1.90358e-91			g16681	2.84476	0			g44927	3.76178	0			g16965	5.01195	0			g58505	6.49352	2.45599e-281			g43239	1.78248	3.41426e-09
	g60499	1.68937	0			g54136	1.60216	1.03971e-228			g59654	2.84207	0			g29269	3.75876	0			g1310	5.00623	2.78101e-184			g896	6.48541	2.33012e-280			g20583	1.76064	0.0503249
	g20810	1.68866	0			g42992	1.6001	3.32856e-61			g13247	2.82618	2.86764e-276			g60792	3.75868	0			g1105	4.96096	1.84556e-237			g29790	6.48039	0			g42585	1.73977	1.14256e-14
	g46789	1.687	4.12144e-244			g32017	1.58484	8.8329e-116			g7797	2.82563	0			g9080	3.73378	0			g39980	4.92177	0			g62884	6.47859	1.20778e-221			g20112	1.73612	0.0133191
	g3899	1.68274	2.41024e-98			g13520	1.58341	3.29947e-46			g16724	2.82031	3.18591e-226			g25578	3.72776	0			g58234	4.90206	0			g5009	6.47127	0			g405	1.73	1.21958e-06
	g5341	1.68136	0			g24435	1.57968	9.61939e-65			g38022	2.8153	1.19815e-237			g34999	3.72267	0			g63332	4.87406	0			g54131	6.46624	8.14604e-230			g20745	1.71631	0.00900492
	g49962	1.68135	1.26055e-84			g42501	1.57897	3.76621e-48			g37055	2.81203	0			g55589	3.70256	0			g1019	4.85818	0			g31302	6.46136	1.37598e-177			g62330	1.70994	5.98103e-06
	g20022	1.68128	0			g51746	1.57819	7.65586e-137			g42843	2.80769	0			g1296	3.70005	0			g20800	4.85215	1.21367e-185			g13583	6.44282	2.89321e-251			g48503	1.70023	0.0221032
	g48926	1.68011	0			g43113	1.56068	2.72197e-39			g4547	2.80238	0			g1105	3.69969	0			g63628	4.84874	0			g39673	6.41182	3.70088e-199			g13867	1.67447	0.303952
	g16295	1.67847	5.56039e-158			g59698	1.55304	2.83161e-73			g43714	2.79837	0			g56071	3.69273	0			g15768	4.82765	0			g24724	6.40816	0			g25621	1.67429	1.02953e-12
	g20458	1.67807	0			g18302	1.54155	1.89205e-39			g26291	2.79771	0			g4104	3.68782	0			g13217	4.76439	0			g58412	6.3984	0			g16785	1.67358	0.000344795
	g35016	1.67359	0			g20025	1.54148	3.61684e-78			g42099	2.78766	0			g31638	3.67846	0			g56819	4.75822	0			g8296	6.38903	0			g9325	1.66556	5.9536e-10
	g7173	1.6726	0			g16771	1.52806	6.41239e-90			g61335	2.78733	0			g59369	3.6696	0			g13819	4.73332	0			g1228	6.34908	1.54022e-279			g50574	1.65774	4.77409e-06
	g59035	1.67166	9.1657e-249			g59800	1.52457	3.26423e-51			g30645	2.78722	0			g59277	3.66444	0			g9396	4.73229	6.94124e-264			g24506	6.33417	0			g7929	1.65269	2.3339e-08
	g40891	1.67	1.07082e-216			g41650	1.52302	4.95264e-216			g59846	2.78598	0			g24611	3.65308	0			g26291	4.73006	7.88306e-274			g34024	6.31617	1.82258e-294			g12299	1.62989	0.00520877
	g39165	1.66975	0			g50413	1.51247	4.45616e-32			g23156	2.78564	0			g5237	3.64163	0			g51085	4.72428	0			g2300	6.2899	0			g6094	1.60655	0.0812206
	g31496	1.66823	1.16295e-150			g9006	1.51106	5.00291e-167			g58284	2.7796	1.06749e-273			g23481	3.636	0			g25458	4.70244	8.4296e-227			g25533	6.28838	9.04142e-271			g41081	1.58435	6.94095e-05
	g30161	1.66781	0			g54255	1.50851	3.10214e-101			g47156	2.77725	8.50691e-237			g37350	3.63304	0			g57206	4.70025	8.33922e-193			g13391	6.27922	0			g33871	1.58215	0.00319435
	g60747	1.66699	1.53515e-102			g55107	1.50588	1.97315e-49			g54792	2.7725	2.90745e-265			g7933	3.63059	0			g34455	4.69959	0			g204	6.26121	0			g29532	1.57687	0.152629
	g38995	1.66456	7.46382e-195			g24356	1.504	7.85022e-70			g55229	2.77167	0			g60224	3.60213	0			g29094	4.68634	9.54535e-208			g20174	6.25617	0			g4732	1.55351	7.65415e-24
	g24316	1.66435	0			g24884	1.50267	1.11184e-73			g30521	2.76036	0			g29224	3.59871	0			g55229	4.68163	0			g60827	6.25262	1.95198e-257			g20042	1.55336	1.16591e-05
	g26205	1.66356	3.1916e-67			g50412	1.49918	1.09691e-39			g25314	2.74964	5.47678e-249			g50365	3.5921	0			g34440	4.6612	0			g17013	6.23993	0			g5367	1.54739	1.08995e-10
	g50500	1.6617	0			g30909	1.49725	2.15698e-146			g37044	2.74476	0			g16836	3.58851	0			g34254	4.63287	0			g26098	6.23928	1.60597e-222			g41000	1.52862	0.0903972
	g60272	1.65958	0			g17499	1.49423	1.18997e-29			g42104	2.7344	0			g51968	3.57963	0			g35432	4.5922	0			g49793	6.23252	2.13781e-301			g24090	1.52428	2.43813e-23
	g34206	1.6594	0			g33875	1.48381	2.03512e-47			g24522	2.73097	0			g26388	3.57718	0			g60795	4.5821	0			g42611	6.23212	0			g55594	1.52113	5.40686e-05
	g64072	1.65842	0			g10084	1.48372	5.43291e-22			g24062	2.72659	0			g59120	3.57585	0			g719	4.53865	5.73539e-189			g54905	6.20086	0			g44467	1.51605	0.0198424
	g4365	1.65758	7.3186e-81			g60019	1.48265	3.56796e-81			g20436	2.72538	0			g37995	3.56402	0			g37995	4.51101	7.56843e-207			g25671	6.19522	4.91092e-220			g37366	1.51069	0.00137557
	g30343	1.65418	1.21242e-82			g25134	1.47287	2.52547e-73			g5538	2.71395	0			g21095	3.56162	0			g30645	4.50833	0			g895	6.17151	3.19117e-264			g13864	1.50658	3.1743e-05
	g58267	1.65322	3.5604e-160			g59354	1.4601	9.18263e-99			g30162	2.7084	1.97909e-242			g54762	3.54482	0			g54887	4.506	0			g59245	6.17138	1.10338e-176			g7335	1.50094	7.42555e-06
	g31104	1.65178	8.85371e-256			g26017	1.45948	1.18148e-43			g26813	2.70552	0			g43762	3.5408	0			g56070	4.50554	2.97887e-209			g17538	6.16478	0			g50746	1.49458	0.00157508
	g5118	1.6514	1.68406e-292			g60392	1.45631	7.19802e-55			g29023	2.70373	0			g42721	3.529	0			g12068	4.49023	0			g18457	6.13726	0			g13520	1.49391	1.73124e-07
	g61561	1.64776	0			g34253	1.45618	3.52173e-27			g34440	2.69979	0			g54041	3.52684	0			g25461	4.47776	5.06791e-164			g50259	6.10906	0			g24622	1.48919	0.0361286
	g42645	1.64763	1.61162e-287			g20705	1.45454	1.61934e-42			g54155	2.69884	0			g56068	3.52551	0			g25764	4.47527	0			g59943	6.08638	0			g25519	1.47434	0.000127473
	g21557	1.64741	0			g55009	1.4539	2.44327e-67			g4945	2.69782	2.83549e-222			g24415	3.51824	0			g19448	4.45501	1.20243e-217			g50099	6.0603	0			g54633	1.47091	7.41302e-05
	g48682	1.6467	1.38525e-169			g30849	1.45191	2.06103e-50			g30658	2.69253	0			g9272	3.51787	0			g58189	4.44196	0			g47191	6.06017	0			g34582	1.47045	0.00102714
	g37391	1.64252	0			g54633	1.45034	8.9007e-49			g42383	2.68665	0			g19448	3.51652	0			g19074	4.44019	8.60615e-196			g59087	6.0287	0			g9290	1.47035	3.4451e-05
	g41108	1.64133	4.02208e-128			g20265	1.43122	1.12051e-35			g24788	2.68391	0			g19673	3.51451	0			g54041	4.43456	3.48673e-169			g25613	6.00666	0			g19675	1.46148	1.23457e-18
	g54057	1.63932	0			g58708	1.42808	7.02235e-62			g41994	2.68317	9.65405e-232			g42678	3.49944	0			g7933	4.42488	0			g59606	6.00064	0			g8845	1.4454	0.000394722
	g7151	1.63482	0			g26047	1.41758	5.84576e-127			g37600	2.67635	2.86491e-287			g54875	3.49901	0			g1311	4.41497	6.09671e-254			g13107	5.99322	0			g58844	1.44051	1.41547e-06
	g52527	1.63462	0			g24343	1.41151	8.58145e-67			g59972	2.67499	0			g56119	3.49893	0			g4525	4.4059	1.08467e-219			g48300	5.9923	5.84044e-196			g19619	1.42795	1.68518e-05
	g61020	1.634	1.03086e-163			g14004	1.41048	7.66474e-40			g54116	2.66815	8.38655e-238			g13867	3.49518	0			g23938	4.39685	0			g47272	5.98995	5.19712e-255			g13130	1.42795	0.00358981
	g58673	1.63291	0			g54330	1.40928	1.9815e-39			g4587	2.66679	0			g25764	3.48724	0			g31638	4.38511	4.1691e-273			g59234	5.98828	0			g38632	1.41604	3.4504e-08
	g43076	1.63222	6.74838e-107			g50378	1.40894	8.29324e-47			g34455	2.66543	0			g3925	3.48616	0			g5538	4.37584	7.34908e-273			g20263	5.97071	0			g157	1.3931	1.07729e-05
	g5543	1.63164	3.09791e-61			g50311	1.40083	3.86182e-35			g24456	2.6581	1.99048e-299			g21116	3.4772	0			g16836	4.34482	0			g14853	5.95594	2.97129e-199			g7736	1.39229	2.14888e-05
	g60411	1.62998	7.78144e-177			g59936	1.40007	5.00769e-28			g41914	2.65522	1.09915e-103			g20600	3.44949	0			g60551	4.3262	2.71989e-236			g54424	5.95053	7.525e-191			g34175	1.38679	0.00310118
	g43775	1.62965	4.85396e-166			g41993	1.39796	4.08794e-105			g1199	2.64882	0			g42644	3.44688	0			g20600	4.30416	0			g43069	5.9481	5.52036e-143			g5103	1.38673	6.80233e-07
	g33582	1.62941	1.46673e-145			g34488	1.39714	2.65945e-162			g9365	2.64805	3.09515e-197			g8424	3.44164	0			g24415	4.29956	0			g41677	5.92396	0			g42752	1.37328	0.185637
	g1172	1.62941	0			g13555	1.38923	2.25684e-32			g20377	2.64594	0			g30918	3.43764	0			g50319	4.29717	4.32244e-241			g62786	5.91289	5.51896e-234			g34127	1.36077	1.09452e-07
	g54429	1.62856	3.10052e-284			g24340	1.38739	5.56703e-107			g61107	2.64349	0			g55301	3.43706	0			g54703	4.25921	6.44626e-253			g50092	5.90723	0			g54437	1.35707	1.47141e-09
	g27423	1.62751	7.45227e-83			g31462	1.37205	2.05205e-196			g51620	2.63326	6.70489e-218			g15768	3.43009	0			g26049	4.25141	1.53084e-139			g12268	5.89735	1.09719e-199			g342	1.35604	0.358584
	g39004	1.6271	0			g25437	1.36286	2.87357e-66			g60000	2.61765	1.75265e-245			g63628	3.41052	0			g23156	4.24174	0			g42334	5.89591	0			g61	1.35438	4.8302e-06
	g6017	1.62285	1.40069e-249			g13292	1.35338	5.44251e-100			g43368	2.61741	4.91581e-295			g13670	3.39541	0			g30045	4.22125	1.29388e-207			g59789	5.89216	0			g23292	1.35325	0.00168553
	g5752	1.62233	0			g59115	1.3355	6.62903e-66			g54220	2.61396	0			g31426	3.37747	0			g58794	4.21488	0			g25617	5.88765	0			g46236	1.33916	0.00299334
	g47461	1.62103	8.27766e-237			g13574	1.32192	7.67233e-75			g39016	2.61128	0			g4732	3.37527	0			g25246	4.20076	8.79387e-224			g9713	5.88739	0			g58356	1.33755	0.00189525
	g29834	1.61812	0			g4951	1.32182	3.51307e-85			g58794	2.61084	0			g289	3.36896	0			g36425	4.19782	3.75756e-168			g59241	5.87651	3.568e-259			g59369	1.33455	9.43355e-17
	g10534	1.61672	0			g25233	1.32113	3.03793e-36			g45944	2.60226	7.17959e-269			g34471	3.36826	0			g58684	4.19756	5.49686e-148			g54702	5.85743	7.43537e-299			g55227	1.33171	5.90508e-12
	g62017	1.61562	0			g61171	1.32011	1.55802e-69			g57168	2.59819	1.51255e-220			g60795	3.36747	0			g58144	4.17486	5.50238e-216			g16883	5.84589	0			g55238	1.32725	0.0425655
	g43118	1.61532	0			g43240	1.31906	9.85096e-86			g12698	2.59623	5.89966e-245			g56819	3.36033	0			g54303	4.17349	1.29152e-190			g58497	5.80929	0			g421	1.30859	0.441071
	g20189	1.61306	4.03117e-123			g46870	1.31709	1.16474e-105			g25937	2.58904	2.6663e-291			g4587	3.35925	0			g51620	4.1304	1.43397e-182			g38435	5.80395	6.44182e-230			g42992	1.30697	0.14403
	g6382	1.61056	0			g12200	1.30857	1.50274e-60			g50526	2.57232	1.13385e-288			g61042	3.34989	0			g37600	4.08584	2.03854e-169			g29801	5.79806	2.81395e-209			g17252	1.30521	0.00745994
	g20672	1.61055	2.99163e-106			g24319	1.3065	2.87488e-24			g50597	2.57167	0			g4400	3.34022	0			g17744	4.08299	1.51068e-251			g1303	5.79572	4.98179e-234			g25734	1.30105	0.0776107
	g47072	1.6102	7.82628e-101			g20630	1.30572	8.46179e-44			g16410	2.56972	9.53641e-256			g56031	3.33775	0			g60224	4.07879	2.50626e-160			g25953	5.78716	7.30722e-264			g60587	1.29686	0.00204458
	g60475	1.6087	5.845e-92			g13922	1.30125	2.68189e-37			g43210	2.5556	0			g58684	3.33303	0			g24611	4.07778	7.32682e-289			g63876	5.77804	0			g16744	1.28667	7.69189e-06
	g21133	1.60824	0			g34420	1.29809	1.67752e-123			g50910	2.55473	0			g59110	3.33033	0			g38844	4.05258	9.22793e-141			g29796	5.77333	6.78713e-235			g27227	1.26862	1.17817e-06
	g12606	1.60822	1.13066e-52			g59232	1.29665	7.15658e-110			g60684	2.5502	1.86746e-280			g549	3.32814	0			g43348	4.03992	2.31344e-267			g5935	5.77266	8.09664e-185			g20025	1.26136	8.8564e-07
	g12843	1.60738	9.02102e-246			g25916	1.29054	3.12813e-44			g42023	2.548	2.21788e-232			g56084	3.32531	0			g59143	4.03562	2.4711e-277			g57512	5.76329	5.62883e-227			g24578	1.25006	0.00365958
	g5240	1.60539	0			g49988	1.28999	2.70124e-102			g59226	2.54782	0			g36425	3.31945	0			g17331	4.02715	6.33207e-176			g46362	5.74595	0			g43972	1.23471	3.02687e-05
	g53373	1.60382	0			g34529	1.2837	1.02081e-46			g12574	2.54702	5.50397e-277			g25947	3.31861	0			g46570	4.00056	1.85383e-303			g16955	5.73986	1.82401e-286			g54755	1.22945	0.00289415
	g25903	1.60311	8.0331e-93			g29860	1.28285	5.04407e-135			g51084	2.54368	1.6674e-187			g56122	3.31017	0			g24456	4.0001	3.2359e-198			g360	5.72533	0			g517	1.227	0.000933999
	g49063	1.60177	3.28682e-141			g33343	1.2825	6.40752e-39			g29963	2.54251	0			g5740	3.28887	0			g34097	3.9957	2.56092e-193			g59238	5.70074	1.63947e-248			g13501	1.21875	0.141309
	g13564	1.60138	0			g29785	1.2814	4.45985e-47			g41081	2.53459	0			g55130	3.26836	0			g17840	3.99077	9.54564e-165			g39376	5.69407	0			g137	1.21849	0.134967
	g13834	1.59769	0			g30430	1.27951	1.07849e-34			g48102	2.5308	0			g57206	3.25787	0			g56084	3.97741	5.43223e-142			g46533	5.68539	0			g38752	1.20955	0.000189191
	g876	1.59639	2.50643e-125			g10077	1.27897	3.69072e-50			g30857	2.52881	0			g54116	3.25627	0			g34999	3.94391	0			g20281	5.67496	1.14038e-208			g23130	1.18285	0.0148859
	g25380	1.59533	1.06852e-221			g20606	1.27797	1.81264e-88			g60443	2.52822	7.47708e-235			g41964	3.24911	0			g16410	3.93856	1.16458e-161			g29793	5.66425	1.77315e-261			g50588	1.17694	2.14764e-05
	g33901	1.59491	8.14922e-207			g54107	1.27414	2.30285e-145			g43658	2.52333	0			g34097	3.24616	0			g42999	3.92993	1.69369e-227			g10044	5.65942	0			g20726	1.17523	0.368951
	g31521	1.59427	1.36976e-80			g762	1.27277	2.61029e-122			g61106	2.52203	2.35902e-232			g42317	3.20656	0			g49874	3.91047	2.62058e-170			g45950	5.65025	0			g46819	1.16218	2.6112e-06
	g1169	1.59259	0			g13575	1.26664	4.90731e-95			g31265	2.51823	8.08251e-267			g25166	3.19513	0			g59369	3.9056	0			g54775	5.64948	6.32469e-236			g31610	1.15562	2.83685e-05
	g41799	1.59171	5.54003e-214			g60677	1.26149	3.8189e-36			g30918	2.51806	0			g46303	3.18081	0			g4284	3.88553	0			g60198	5.64673	2.31534e-224			g1014	1.12756	0.0838469
	g24312	1.59124	0			g55653	1.2593	2.11794e-36			g47819	2.51297	0			g16560	3.16821	0			g55589	3.87776	1.4687e-165			g3296	5.6381	5.29847e-194			g1388	1.10596	1
	g2029	1.5897	5.13344e-70			g34	1.25404	4.24494e-25			g11909	2.50603	0			g54815	3.15649	0			g54654	3.87542	2.15642e-155			g48889	5.62249	4.07029e-236			g60235	1.08795	0.437465
	g8699	1.5894	1.25449e-118			g35092	1.24736	2.10001e-55			g4400	2.49913	0			g54887	3.15614	0			g55301	3.85878	6.13052e-231			g47209	5.6113	0			g60156	1.08416	0.088176
	g32551	1.58811	0			g31463	1.24236	7.33641e-181			g29596	2.49904	1.61077e-272			g34017	3.15496	0			g56068	3.8266	1.75841e-127			g43463	5.6038	1.23901e-156			g9422	1.08369	0.0139147
	g50581	1.58673	0			g50219	1.23636	7.53531e-27			g31053	2.4877	1.47096e-216			g540	3.13544	3.31392e-298			g289	3.8092	5.35228e-129			g24037	5.5946	6.40555e-253			g54846	1.06275	1.64648e-05
	g43460	1.5811	0			g26012	1.23295	2.86252e-84			g20361	2.48096	4.58553e-192			g25360	3.12687	0			g34017	3.80229	0			g2343	5.59072	0			g29447	1.05991	0.572449
	g24433	1.57996	4.78946e-239			g12834	1.22943	5.27891e-52			g59652	2.47808	0			g4547	3.12545	0			g12624	3.79996	1.64857e-242			g60239	5.57437	0			g59232	1.05288	0.000913262
	g29379	1.57941	0			g47371	1.22668	5.49208e-24			g48449	2.47784	0			g50110	3.11759	0			g12476	3.78433	2.49683e-256			g24778	5.56247	2.26369e-247			g60458	1.05008	3.97429e-07
	g7161	1.57833	5.79159e-126			g47370	1.22552	1.01103e-39			g24373	2.47339	3.97135e-237			g62273	3.1172	0			g40739	3.77694	2.33817e-145			g5432	5.55402	3.281e-210			g47077	1.04229	2.52783e-09
	g55047	1.57809	1.12043e-148			g30639	1.2225	3.41854e-43			g53292	2.47266	0			g43387	3.11377	0			g55052	3.75739	1.30767e-207			g58862	5.52281	1.36812e-237			g13299	1.04067	3.25194e-06
	g45581	1.57713	1.73676e-63			g59630	1.21708	1.03974e-84			g51050	2.47071	0			g56069	3.10726	0			g375	3.75384	1.35745e-182			g54532	5.52192	0			g5655	1.03763	0.0621391
	g16958	1.57649	0			g43910	1.20584	9.92304e-26			g10186	2.46636	4.60725e-235			g18076	3.10607	0			g18081	3.75375	3.4257e-198			g58491	5.47282	1.41619e-289			g51374	1.02395	0.16587
	g36364	1.57582	4.93237e-284			g42593	1.19682	1.07069e-33			g37633	2.46266	0			g23938	3.07895	0			g25825	3.75119	4.71035e-129			g28064	5.45863	1.9742e-302			g42071	-1.00009	0.0358843
	g47140	1.57539	0			g42775	1.19643	2.7114e-33			g43226	2.45901	1.89019e-255			g49874	3.07447	0			g60470	3.74272	2.42276e-218			g17348	5.45798	0			g29842	-1.00366	0.645035
	g29230	1.57412	1.43639e-57			g27016	1.18999	2.8272e-31			g43239	2.45579	0			g54303	3.06934	0			g17200	3.72729	3.18245e-152			g38765	5.45646	0			g30850	-1.00375	8.9392e-13
	g42837	1.5737	0			g20297	1.18518	1.81797e-100			g45843	2.45249	1.29972e-295			g44152	3.05326	0			g58904	3.72111	2.53781e-132			g26200	5.45586	0			g4477	-1.00869	0.0100565
	g30417	1.57193	4.38077e-129			g61318	1.18351	1.29902e-66			g58342	2.45025	0			g20800	3.04994	0			g56073	3.71716	4.11396e-139			g32807	5.45398	1.12661e-119			g9018	-1.01113	7.95733e-05
	g33458	1.57061	7.43264e-128			g54023	1.17408	3.85468e-23			g55531	2.44473	4.01765e-261			g25300	3.04523	0			g61120	3.71705	1.33223e-210			g29897	5.42183	1.78844e-159			g35279	-1.01263	4.48196e-05
	g33528	1.5695	1.56811e-70			g47776	1.17306	1.46525e-132			g29224	2.44057	0			g1732	3.04299	4.3364e-274			g4923	3.71399	1.44043e-66			g42741	5.3863	2.14269e-297			g25992	-1.01451	2.92292e-06
	g17512	1.56695	4.34452e-76			g43124	1.17178	2.6804e-28			g13270	2.4394	2.12309e-181			g60551	3.03392	0			g37044	3.71361	7.18579e-272			g59060	5.37437	0			g48811	-1.02157	1.75119e-08
	g25309	1.56588	4.75435e-127			g38360	1.17014	9.70688e-91			g12476	2.43886	0			g54659	3.02769	0			g56071	3.7107	1.48428e-179			g49311	5.37396	4.95818e-269			g44735	-1.02172	1.23326e-10
	g21844	1.56509	2.69769e-287			g55166	1.17013	3.67319e-146			g52924	2.4363	0			g11493	3.02102	0			g20840	3.7052	3.08858e-285			g29936	5.37235	1.15558e-226			g33402	-1.02282	2.85002e-05
	g34449	1.56487	0			g30549	1.16911	3.61183e-70			g29099	2.43493	2.63293e-197			g34008	3.02046	0			g43560	3.70059	7.61631e-157			g47359	5.37074	1.98878e-174			g60411	-1.02423	0.000152839
	g573	1.56418	2.3718e-91			g24578	1.16724	8.80992e-23			g25751	2.43203	8.25564e-286			g25246	3.01754	0			g25488	3.69858	3.75404e-173			g372	5.35582	3.23665e-292			g4591	-1.02526	0.00938324
	g43187	1.56381	5.82116e-59			g31550	1.16068	1.56743e-58			g8424	2.43152	2.29183e-217			g30825	3.01639	0			g35170	3.68507	0			g48047	5.3556	5.45417e-236			g60246	-1.02569	0.000605835
	g4530	1.56299	3.02899e-122			g55018	1.15804	5.08843e-60			g29221	2.43051	0			g60892	3.01377	0			g29342	3.67028	9.30466e-176			g34518	5.34325	7.97299e-250			g61812	-1.02926	5.2017e-05
	g38237	1.56231	2.77623e-133			g37934	1.15637	3.15348e-30			g25246	2.42739	0			g25488	3.00298	0			g30825	3.66785	0			g16907	5.34301	9.48211e-303			g30015	-1.03078	0.110147
	g64064	1.56193	0			g45801	1.14992	4.17389e-90			g40930	2.42309	2.52844e-125			g20413	3.00153	0			g10186	3.6366	5.93271e-158			g34026	5.34193	1.46226e-224			g60730	-1.03121	3.61222e-11
	g37937	1.56133	0			g55082	1.14891	3.51878e-35			g5237	2.41725	0			g153	2.99965	0			g42023	3.63633	8.50138e-176			g25973	5.33195	0			g9347	-1.03495	7.1495e-11
	g54897	1.56127	1.10473e-108			g9783	1.13376	1.55478e-69			g50146	2.41692	0			g34592	2.99772	0			g26813	3.60346	0			g26078	5.31478	4.01905e-186			g47140	-1.03562	1.66898e-09
	g9047	1.55423	1.33701e-60			g30808	1.13194	4.43653e-122			g46336	2.41589	0			g17840	2.98904	0			g43714	3.58437	0			g4535	5.30733	8.60652e-166			g37262	-1.03572	0.000296117
	g59775	1.55421	0			g15986	1.12416	1.2207e-27			g29522	2.41357	7.75739e-145			g50574	2.98262	0			g13867	3.57959	0			g11765	5.26537	2.99305e-260			g59719	-1.03851	9.40458e-12
	g31397	1.55392	0			g42081	1.12163	4.87691e-25			g13670	2.41195	0			g17200	2.97581	0			g50113	3.57734	1.54205e-291			g9346	5.26216	7.55481e-295			g6382	-1.04368	5.64555e-11
	g9821	1.55131	1.07163e-162			g47101	1.12046	2.69045e-86			g8733	2.41183	0			g17331	2.97533	0			g36868	3.54698	0			g47205	5.24958	0			g13834	-1.0441	3.75153e-12
	g59328	1.55074	0			g9002	1.11636	9.37543e-42			g41964	2.40369	1.3496e-203			g42104	2.97268	0			g42721	3.54382	6.69647e-142			g55332	5.24904	3.25462e-201			g20672	-1.04693	0.0627066
	g61812	1.5503	2.39916e-201			g33778	1.11609	2.38079e-23			g42093	2.40104	0			g17744	2.97144	0			g43587	3.52045	5.42309e-197			g54782	5.23434	1.56975e-281			g19479	-1.04728	2.98928e-09
	g17905	1.5477	8.97067e-221			g14717	1.10973	6.42856e-25			g58765	2.39298	8.21726e-260			g42170	2.96854	0			g39016	3.51066	9.16392e-231			g38657	5.23394	0			g13238	-1.05443	5.85276e-08
	g12656	1.5474	2.01314e-110			g4441	1.10399	8.69952e-71			g29401	2.38924	5.52296e-268			g54335	2.96732	0			g25207	3.50538	2.33699e-127			g61053	5.2182	2.19349e-243			g19902	-1.05447	0.0144636
	g2456	1.54676	4.4755e-273			g12828	1.10332	2.36239e-29			g34152	2.38858	3.76359e-296			g26291	2.96378	0			g5344	3.50501	0			g38169	5.20069	2.2421e-136			g2456	-1.06028	2.92828e-08
	g46802	1.54655	8.29446e-220			g60620	1.10144	6.3876e-48			g15856	2.38674	1.84867e-232			g34467	2.95779	0			g42170	3.49822	1.22916e-118			g25480	5.19663	0			g29379	-1.06102	2.04105e-15
	g19479	1.54484	0			g42739	1.10061	3.03107e-121			g54344	2.38259	0			g40739	2.95613	0			g25947	3.49257	1.08761e-111			g30862	5.19254	2.3625e-156			g43460	-1.06117	1.44763e-09
	g4086	1.54242	7.41015e-134			g9506	1.10033	8.97556e-23			g54875	2.38212	0			g34440	2.95568	0			g47164	3.48982	8.13705e-153			g4932	5.18685	1.96857e-148			g12843	-1.06168	5.006e-08
	g16925	1.5416	0			g26910	1.09678	1.67788e-19			g60551	2.38212	1.79258e-248			g38844	2.95476	0			g60684	3.47802	7.03809e-182			g5453	5.17489	4.80613e-272			g25157	-1.0637	3.40806e-12
	g20248	1.54129	1.11768e-181			g46355	1.0946	5.90897e-51			g54330	2.38162	3.26894e-163			g18081	2.94863	0			g30857	3.47612	0			g24992	5.17412	4.49006e-273			g19337	-1.06906	0.00988953
	g26136	1.54071	1.06485e-227			g25666	1.09418	2.16921e-40			g31426	2.38109	1.41072e-206			g25665	2.94615	0			g4732	3.47298	0			g43247	5.17063	1.69575e-287			g13219	-1.07086	2.04704e-05
	g1605	1.53982	2.08234e-67			g49726	1.09216	6.35397e-44			g17420	2.37723	0			g26214	2.93783	0			g27170	3.47288	2.66343e-237			g18335	5.16882	0			g25380	-1.07233	2.3038e-09
	g41625	1.53893	6.34888e-264			g34712	1.08965	2.06316e-66			g61078	2.37648	0			g60362	2.92985	0			g16681	3.47079	2.31174e-149			g38120	5.16616	0			g28945	-1.07426	0.00386819
	g31548	1.53642	8.34213e-69			g255	1.08155	3.89449e-86			g44927	2.37367	0			g55229	2.92202	0			g34471	3.45656	2.54924e-203			g31385	5.16577	1.37298e-267			g60499	-1.08607	4.55234e-11
	g60170	1.53437	7.07453e-91			g40968	1.07462	1.08174e-40			g54762	2.37079	0			g1069	2.91194	0			g549	3.42866	0			g42814	5.16154	0			g58240	-1.08719	3.72796e-06
	g9347	1.53279	0			g26924	1.0706	2.67326e-92			g57206	2.36496	1.99538e-190			g24456	2.90957	0			g52724	3.41216	4.38635e-262			g28078	5.15735	5.48809e-287			g31091	-1.09084	1
	g54469	1.52976	2.07475e-50			g43078	1.06273	1.53752e-32			g17331	2.36479	3.77182e-200			g51620	2.90311	0			g43368	3.39382	1.56933e-157			g55004	5.15157	1.64191e-191			g23739	-1.09952	2.1019e-10
	g13324	1.52883	4.03946e-233			g3436	1.06061	1.1204e-57			g62396	2.36478	2.93424e-155			g59216	2.89889	0			g34467	3.39318	0			g18344	5.12271	0			g54057	-1.1012	1.14746e-11
	g9963	1.52763	1.5897e-262			g58720	1.06019	1.32402e-101			g17980	2.3628	2.42825e-254			g34455	2.89783	0			g52924	3.38708	0			g230	5.1032	2.61762e-193			g49871	-1.10149	2.52286e-11
	g13264	1.52736	6.0175e-56			g34883	1.05998	8.41326e-63			g59120	2.36153	0			g5344	2.8918	0			g5740	3.38372	8.02109e-157			g45722	5.09818	0			g17905	-1.10362	0.000105219
	g54340	1.5273	0			g41746	1.05401	7.25879e-120			g19673	2.35879	0			g60046	2.89003	0			g29743	3.36067	2.29817e-267			g59608	5.09134	0			g17223	-1.10713	0.00111104
	g61043	1.52589	9.61317e-109			g55182	1.05297	3.93919e-29			g19443	2.3587	2.01917e-208			g48016	2.88241	2.66279e-272			g18089	3.35859	3.93641e-202			g29282	5.08817	2.50484e-227			g42544	-1.10889	0.0659766
	g38044	1.52325	0			g55060	1.05179	4.19192e-76			g61336	2.35838	0			g12624	2.88228	0			g18076	3.35651	6.96945e-141			g24821	5.0822	3.12039e-134			g55622	-1.10988	8.38785e-11
	g20570	1.52243	1.53843e-62			g59147	1.05178	5.71255e-109			g29269	2.3574	0			g28563	2.8807	0			g50574	3.34558	1.13285e-215			g43147	5.08182	0			g1169	-1.11002	8.21143e-11
	g50511	1.51966	5.14197e-164			g31713	1.04769	1.68013e-47			g9272	2.35349	0			g9881	2.87229	1.25374e-268			g34592	3.34351	7.52655e-254			g5471	5.07911	1.0494e-258			g43775	-1.11321	2.629e-06
	g43774	1.51957	0			g46387	1.04716	4.13495e-27			g29076	2.35057	1.0479e-274			g63719	2.87056	0			g50910	3.3361	2.12817e-280			g38785	5.07313	4.69594e-155			g20189	-1.11429	0.000975225
	g13403	1.51942	1.78904e-172			g31217	1.04347	2.30122e-30			g54887	2.34807	0			g10161	2.86632	0			g42099	3.33319	0			g9857	5.05062	3.96403e-167			g25903	-1.1155	0.0546415
	g603	1.51927	2.07183e-77			g16770	1.04205	7.49222e-25			g44995	2.3402	0			g34004	2.8636	0			g25300	3.33133	8.66323e-161			g26933	5.03836	3.33766e-154			g603	-1.11561	0.0879961
	g19971	1.51698	4.69282e-151			g43237	1.03961	8.41162e-21			g26747	2.33827	3.19354e-298			g55284	2.84827	0			g23481	3.32173	1.86641e-184			g12654	5.03784	0			g10265	-1.11614	0.000132322
	g49009	1.51624	6.04015e-247			g24500	1.02505	1.64073e-53			g56819	2.3369	0			g5524	2.84537	9.24586e-257			g50110	3.27696	1.28411e-125			g54016	5.0307	1.07637e-149			g31592	-1.11643	4.08537e-11
	g42876	1.51408	0			g9247	1.02375	2.04482e-65			g1296	2.33549	0			g59810	2.8443	0			g23211	3.27109	1.63562e-105			g13954	5.02094	0			g163	-1.1165	0.00325329
	g24342	1.51334	3.03913e-71			g35310	1.02	1.41767e-36			g58790	2.33351	1.25584e-234			g58883	2.83731	0			g34004	3.26879	2.1313e-128			g46536	5.00919	9.61137e-207			g39004	-1.11744	1.19299e-13
	g16805	1.51329	5.53427e-150			g1134	1.01847	2.48026e-22			g30407	2.33145	2.67041e-266			g11499	2.83005	0			g37181	3.26533	3.35868e-199			g19591	4.99673	1.92905e-206			g33235	-1.11779	3.43036e-05
	g59093	1.51301	0			g58640	1.01589	7.23027e-31			g15768	2.32975	0			g30645	2.82569	0			g54335	3.25788	0			g50404	4.99096	5.4793e-100			g54082	-1.11895	9.81761e-09
	g35362	1.51267	0			g54338	1.01559	1.00071e-95			g41935	2.32828	0			g29964	2.82436	0			g50597	3.25574	1.4655e-197			g51463	4.99063	0			g25309	-1.12043	0.000654263
	g44735	1.51245	0			g49876	1.01556	8.14682e-47			g63628	2.32788	0			g54657	2.81764	0			g48016	3.2543	1.48826e-100			g45094	4.98653	2.21688e-135			g20458	-1.12287	2.24068e-11
	g25506	1.51023	1.77241e-260			g58352	1.01147	6.3465e-59			g45962	2.32532	1.37872e-206			g24235	2.81186	1.76291e-287			g59654	3.2538	2.36485e-272			g58540	4.96794	1.14629e-152			g53064	-1.12344	0.00580324
	g15362	1.50983	2.21502e-70			g25817	1.01051	1.83152e-129			g43367	2.32509	3.69888e-195			g58794	2.80977	0			g29829	3.25301	2.90898e-149			g32646	4.96559	1.14472e-195			g42837	-1.12367	5.31492e-11
	g46227	1.50964	1.85e-252			g30204	1.01041	2.91702e-17			g59277	2.32248	1.25467e-302			g9331	2.79936	0			g63719	3.25202	1.67081e-210			g20434	4.95858	3.50311e-255			g33901	-1.12485	2.0248e-10
	g13818	1.50952	4.92897e-67			g25938	1.00795	1.61051e-46			g23265	2.32226	7.86432e-249			g5538	2.7988	0			g43080	3.25151	4.02469e-106			g60852	4.94164	1.02981e-124			g49063	-1.12583	0.000156456
	g35073	1.50927	3.76715e-132			g24541	1.00655	1.06005e-79			g58297	2.32044	0			g12476	2.79348	0			g34092	3.21901	0			g35174	4.93212	0			g3987	-1.12656	3.36964e-09
	g20358	1.50835	0			g14040	1.00526	8.67629e-18			g23938	2.3145	0			g9552	2.79257	0			g48102	3.20611	4.04706e-231			g9356	4.92812	1.06662e-200			g35063	-1.13174	0.198849
	g20723	1.50823	1.78114e-241			g25519	1.00225	7.98447e-17			g9290	2.31428	0			g27170	2.76719	0			g46303	3.19919	3.59212e-103			g37768	4.92373	3.32321e-290			g62	-1.13367	7.33637e-15
	g17947	1.50804	0			g58509	1.00095	2.72514e-20			g41823	2.31276	4.94914e-159			g24584	2.76433	0			g9552	3.18016	9.52539e-130			g5296	4.91315	7.79488e-246			g25092	-1.13388	7.62073e-05
	g25257	1.50731	1.18045e-290			g38850	-1.07203	2.66574e-16			g30535	2.31268	0			g36868	2.75845	0			g59216	3.17579	1.7931e-131			g39108	4.91187	4.82812e-149			g38036	-1.13489	1.33698e-11
	g21739	1.50151	7.58065e-288			g38682	-1.09402	1.41603e-10			g422	2.31267	1.63803e-155			g58345	2.75696	6.58522e-225			g24432	3.175	8.74745e-103			g59185	4.91024	1.86532e-203			g8787	-1.1351	0.0526549
	g60445	1.50145	1.81721e-194			g35438	-1.18846	1.10239e-09			g34175	2.31232	0			g8426	2.75013	1.4142e-288			g59810	3.16797	8.04502e-140			g17082	4.90107	0			g20614	-1.13712	0.00471674
	g31185	1.50105	1.69812e-132			g41950	-1.26556	3.91602e-07			g54769	2.30908	0			g12852	2.74873	0			g46391	3.16413	2.55423e-103			g50208	4.90051	5.00301e-220			g58036	-1.14108	0.000633789
	g55	1.50029	7.38744e-94			g13163	-1.28089	2.56953e-12			g34092	2.30686	0			g46330	2.74536	0			g39962	3.14622	1.0049e-262			g38325	4.87592	4.68497e-303			g19559	-1.14145	1.27302e-12
	g25672	1.49907	1.17096e-152			g60767	-1.32807	1.57868e-08			g14668	2.30619	0			g33589	2.73316	2.15346e-240			g50146	3.14554	0			g9816	4.87523	8.45245e-117			g61239	-1.14182	5.67831e-11
	g31592	1.4982	7.30724e-293			g26783	-1.35521	7.27132e-10			g35097	2.30536	0			g39404	2.72546	5.15414e-288			g42843	3.13266	0			g24546	4.86384	1.16033e-148			g6017	-1.14532	4.84773e-08
	g60789	1.49819	5.47535e-101			g20663	-1.42298	1.96185e-08			g25710	2.29959	0			g35076	2.71833	1.18151e-250			g47819	3.12451	2.51437e-257			g20407	4.84811	1.55399e-184			g5238	-1.14623	7.41958e-10
	g61048	1.49725	6.31501e-129			g59483	-1.51335	1.19879e-13			g18089	2.2995	2.8607e-266			g16410	2.70891	6.42055e-278			g46829	3.1148	6.74136e-238			g35046	4.84386	0			g8432	-1.14731	1.50512e-07
	g9384	1.49482	0			g35440	-1.54811	1.07434e-08			g59148	2.29785	2.64546e-220			g24432	2.70838	6.51212e-213			g56031	3.11479	1.73925e-161			g40883	4.83091	0			g41083	-1.15381	0.000180605
	g46545	1.49385	7.40672e-289			g33083	-1.61348	2.8295e-12			g57960	2.29653	0			g19675	2.70501	0			g21095	3.10958	1.12195e-125			g54017	4.81637	1.59846e-194			g38237	-1.1565	2.11144e-05
	g59012	1.49305	5.36216e-109			g15319	-1.6458	1.02579e-12			g12624	2.29238	0			g25458	2.69251	0			g39404	3.09785	6.61906e-128			g60197	4.81464	1.74243e-180			g12354	-1.15964	0.405893
	g21284	1.49227	9.57502e-88			g61253	-1.65325	2.08412e-12			g53610	2.29233	1.83439e-160			g60752	2.69211	7.93875e-284			g13696	3.08806	2.57276e-285			g26507	4.80728	1.30678e-241			g46545	-1.15972	8.88161e-13
	g24793	1.49061	2.98462e-155			g24298	-1.6722	1.30768e-15			g50113	2.28928	0			g11808	2.68852	0			g31352	3.07662	5.67057e-93			g45120	4.79878	1.7851e-181			g52761	-1.1599	0.000227909
	g29134	1.48862	1.37837e-262			g46703	-1.6817	1.83909e-10			g59746	2.28703	0			g37600	2.68622	4.94575e-247			g14668	3.07358	1.61197e-233			g42333	4.77666	3.4468e-224			g7125	-1.16613	1.02866e-10
	g25541	1.48742	3.53965e-184			g58883	-1.71308	7.1557e-11			g26432	2.28485	3.77379e-108			g655	2.66985	6.20059e-273			g54815	3.07331	3.80426e-187			g9260	4.77552	5.91431e-290			g27011	-1.16613	0.00107673
	g25593	1.48738	8.02546e-63			g153	-1.7147	4.06426e-12			g43366	2.28048	0			g18089	2.66335	0			g34008	3.06332	3.53585e-143			g55306	4.77232	1.12793e-152			g19971	-1.16658	0.00036362
	g1123	1.48648	1.66378e-67			g29023	-1.75962	7.76712e-14			g46847	2.27758	2.11769e-216			g23156	2.65958	0			g26978	3.05692	1.61371e-152			g29794	4.7615	3.22416e-250			g25622	-1.16661	1
	g61239	1.48504	1.14967e-265			g20736	-1.81767	1.52705e-14			g4104	2.26826	0			g43682	2.65511	4.17708e-252			g59126	3.049	1.51155e-105			g54994	4.75627	0			g37937	-1.16781	1.32282e-13
	g62593	1.48429	9.20445e-246			g29964	-1.84241	4.69771e-17			g25578	2.26677	1.59296e-206			g41706	2.6461	0			g33589	3.04694	3.07969e-96			g50543	4.75536	3.99294e-141			g54344	-1.17041	0.0118739
	g959	1.48406	6.45534e-56			g42076	-1.89003	7.64935e-12			g20355	2.26665	0			g55331	2.64603	1.18081e-266			g35850	3.0413	2.12335e-105			g42870	4.75334	1.50798e-224			g20149	-1.17394	9.37072e-12
	g48811	1.48232	3.15783e-243			g55284	-1.90808	2.51256e-08			g61128	2.2611	4.69477e-153			g59783	2.63335	1.69798e-241			g9463	3.03397	2.77274e-135			g38155	4.75079	1.04646e-183			g13303	-1.1752	0.000110118
	g43411	1.4818	0			g50614	-1.94619	6.14669e-19			g58752	2.26069	0			g25579	2.63201	0			g22508	3.03174	1.91481e-181			g58541	4.74665	3.23133e-163			g60272	-1.1783	1.43218e-15
	g15497	1.48122	6.32262e-66			g25360	-1.95842	6.12088e-26			g29833	2.25967	0			g35358	2.6319	2.62675e-179			g54659	3.02843	0			g25151	4.74436	5.75126e-154			g21133	-1.18821	1.88791e-11
	g34037	1.47931	3.61766e-82			g28945	-1.99769	1.17918e-19			g20831	2.25815	0			g9463	2.62244	0			g3848	3.00471	2.22463e-115			g25955	4.7364	7.46302e-144			g54897	-1.19015	0.00341853
	g38338	1.47851	2.73437e-56			g29963	-2.00302	4.0962e-15			g1466	2.25238	0			g20052	2.62142	4.61523e-284			g59110	2.97082	1.40023e-151			g31687	4.72616	4.8673e-220			g33458	-1.19499	1.91098e-06
	g13155	1.47739	5.65725e-104			g26079	-2.06169	4.47079e-26			g25524	2.25132	0			g30977	2.62132	1.5313e-297			g60362	2.96825	0			g35396	4.72507	1.0071e-161			g34084	-1.19595	1.20484e-05
	g41083	1.47656	4.77204e-139			g25622	-2.06276	7.0033e-15			g63915	2.25077	1.14562e-139			g50113	2.6204	0			g29964	2.96314	1.46243e-288			g20273	4.71146	8.54467e-189			g23740	-1.19863	0.0438312
	g50936	1.47601	0			g54657	-2.07276	2.13984e-09			g25067	2.24619	1.64235e-172			g54420	2.61873	4.26827e-264			g11499	2.96151	1.02712e-189			g1137	4.70369	2.88135e-139			g9963	-1.21166	8.55611e-08
	g8907	1.47467	2.98192e-54			g22508	-2.13786	3.14837e-14			g50365	2.24586	3.34504e-209			g28562	2.61163	0			g33365	2.95828	3.10407e-131			g50108	4.69533	0			g51305	-1.2121	4.98972e-11
	g3987	1.47431	1.60302e-238			g54815	-2.20514	2.97637e-13			g14294	2.2447	0			g3848	2.60768	6.86779e-282			g30977	2.90742	7.56755e-134			g13665	4.66848	1.45088e-237			g41824	-1.21501	0.0995829
	g13238	1.47371	8.56054e-220			g58655	-2.30518	4.39258e-18			g33365	2.24237	1.68669e-205			g24081	2.60578	0			g28563	2.90526	3.78529e-121			g38850	4.66797	1.81771e-135			g41887	-1.2187	0.000296962
	g9970	1.46912	3.27373e-62			g23938	-2.34251	1.19587e-11			g50356	2.24042	2.39258e-168			g58655	2.60241	0			g50236	2.90364	3.29477e-95			g55261	4.66256	2.71055e-165			g49608	-1.22	9.0051e-08
	g43664	1.46912	0			g34092	-2.42175	2.20387e-21			g60792	2.23696	0			g59126	2.59924	1.35749e-262			g1069	2.89974	1.19001e-234			g4710	4.65344	2.92221e-198			g4398	-1.23146	0.00236816
	g252	1.46819	0			g34467	-2.49631	8.62455e-16			g1474	2.23453	1.28109e-227			g42023	2.59438	0			g26079	2.89902	2.2167e-303			g6980	4.63683	3.22016e-197			g5752	-1.23327	1.9623e-11
	g400	1.46798	2.48689e-98			g54659	-2.53143	4.92243e-15			g10997	2.23392	0			g31352	2.58645	2.0311e-216			g11493	2.88271	3.58991e-115			g29798	4.62864	1.81087e-164			g54432	-1.23542	3.00377e-08
	g31396	1.46669	0			g29828	-2.55031	2.4309e-29			g28945	2.22875	0			g16965	2.5744	0			g57168	2.87853	2.01836e-109			g41761	4.62424	1.07144e-132			g52268	-1.23749	0.00867103
	g56269	1.46581	3.48788e-141			g7797	-2.7004	2.8086e-28			g60161	2.22798	0			g61402	2.57392	0			g50458	2.87507	3.80389e-153			g58451	4.62418	5.78745e-164			g58903	-1.24931	1.37885e-05
	g29890	1.46534	4.58093e-78			g7933	-2.81492	3.31705e-18			g13696	2.22661	0			g29829	2.57352	0			g10161	2.8742	6.12941e-118			g25583	4.6158	2.74197e-224			g25466	-1.26952	0.0033411
	g6895	1.46468	9.18544e-264			g1019	-2.96842	3.22899e-21			g51565	2.22451	8.87678e-249			g52924	2.55824	0			g21116	2.86898	8.33262e-103			g9519	4.59737	1.18812e-243			g33880	-1.27118	1.17003e-15
	g12309	1.46428	2.80763e-46			g59143	-3.00316	5.30791e-25			g34062	2.22419	1.18028e-212			g25622	2.55296	0			g61119	2.86707	1.44517e-118			g55079	4.57254	1.65191e-212			g34533	-1.27125	0.000168154
	g60183	1.46411	0			g30825	-3.10189	1.08961e-25			g3876	2.22193	5.73036e-239			g39779	2.55234	6.61404e-266			g53040	2.86572	1.44758e-236			g19636	4.57233	9.50101e-229			g39165	-1.2745	5.21112e-13
	g12473	1.46384	2.2425e-84			g4732	-3.13424	5.56615e-25			g9086	2.21664	4.8818e-204			g50458	2.55074	0			g61402	2.86296	2.15947e-171			g60367	4.55363	6.1238e-203			g21576	-1.28279	1.82891e-06
	g9989	1.46131	6.74317e-300			g42466	-3.23201	2.66702e-30			g34127	2.21324	0			g2378	2.54804	0			g61392	2.83915	2.45288e-114			g4709	4.53775	2.13645e-238			g57671	-1.28668	0.00028281
	g43959	1.46075	5.79305e-145			g23156	-3.39591	1.06904e-26			g59996	2.2114	7.90692e-220			g15672	2.5455	2.91657e-265			g20413	2.83777	2.11583e-143			g9136	4.52182	1.00167e-171			g60543	-1.28904	6.57444e-07
	g25950	1.45914	4.62298e-42			g59369	-3.6617	2.49827e-23			g9401	2.20906	1.35751e-259			g33892	2.532	0			g54657	2.82989	2.13415e-278			g23446	4.51765	6.72039e-192			g54887	-1.29149	1
	g37874	1.45696	2.13524e-49			g54887	-3.70605	6.04451e-34			g60795	2.20849	0			g30045	2.52951	2.04813e-281			g60752	2.82964	8.40551e-106			g13074	4.51083	1.93038e-250			g54857	-1.29389	5.43488e-05
	g4630	1.45641	2.73654e-272			g30857	-3.89088	1.28458e-38			g41105	2.2065	0			g33083	2.51763	0			g58297	2.82672	6.83321e-188			g46311	4.49736	1.22691e-230			g40891	-1.29579	2.5727e-08
	g61538	1.45631	3.86909e-50			g25764	-4.13652	8.51152e-41			g59947	2.20475	3.40466e-150			g50493	2.50202	4.38229e-199			g61128	2.80816	1.17078e-85			g59801	4.49285	3.07615e-198			g48094	-1.30043	0.00695176
	g44770	1.45406	0			g4400	-4.47521	1.89914e-34			g37350	2.19822	0			g54614	2.5003	0			g59335	2.80748	3.63819e-135			g58961	4.4919	5.82718e-271			g32551	-1.30097	4.47593e-16
	g35189	1.45069	2.58785e-54			g8434	-4.56795	7.26184e-40			g42024	2.19421	4.48664e-267			g59113	2.4998	1.5621e-211			g61576	2.80703	1.50054e-170			g60403	4.46694	2.23262e-78			g24370	-1.30312	3.63419e-15
	g60257	1.45063	1.45854e-291			g16836	-4.70016	5.13517e-38			g35850	2.19247	1.07308e-171			g26978	2.49628	0			g12852	2.79522	5.71043e-180			g8434	4.44978	8.76373e-162			g26747	-1.30504	0.00642784
	g33573	1.4498	1.20692e-224			g22828	-4.83294	2.08745e-43			g60068	2.18344	5.01463e-221			g39016	2.4864	0			g25579	2.79035	1.23371e-121			g59663	4.39977	7.66931e-207			g59503	-1.32054	0.000823678
	g1281	1.44774	1.18742e-65			g37350	-5.05101	1.22886e-40			g12012	2.18156	0			g34092	2.48104	0			g39368	2.78755	3.32034e-143			g12352	4.39844	7.98609e-214			g50458	-1.32576	1
	g24610	1.44757	5.1321e-64			g56819	-5.12605	6.2527e-53			g60462	2.17766	9.57164e-116			g61392	2.47552	1.70777e-285			g8733	2.78275	5.17836e-156			g60617	4.39146	8.56253e-179			g14886	-1.33073	0.38615
	g38365	1.44603	8.59463e-79			g55261	-5.39792	1.90124e-37			g840	2.17173	4.04846e-222			g61253	2.47469	0			g49336	2.7787	7.38976e-97			g7087	4.3911	1.97691e-163			g20736	-1.33791	0.00699423
	g416	1.44358	0			g5401	-5.443	5.35723e-43			g12283	2.1641	1.36499e-151			g14668	2.46641	0			g42466	2.7785	1.03612e-267			g42608	4.38846	2.24459e-126			g52527	-1.34005	2.10223e-17
	g33402	1.44199	5.12332e-118			g52924	-5.46256	1.82103e-53			g41824	2.1616	2.43983e-171			g48365	2.46617	0			g34998	2.771	5.71286e-144			g8186	4.37769	5.59714e-291			g765	-1.3462	0.00314049
	g1863	1.43887	1.73112e-168			g63628	-5.48372	7.60226e-58			g13548	2.16091	0			g30857	2.46162	0			g43366	2.76927	5.94705e-247			g50433	4.36098	2.59138e-152			g42642	-1.34732	6.76353e-13
	g23818	1.43879	5.57695e-153			g24584	-5.56534	1.19754e-57			g41905	2.158	3.47207e-129			g1171	2.45757	0			g7797	2.76791	1.34023e-265			g29235	4.35663	3.90586e-201			g29134	-1.34747	3.54573e-12
	g21513	1.43825	2.59275e-273			g4547	-5.8544	9.16317e-51			g34781	2.15728	3.22043e-249			g46391	2.45504	2.10524e-234			g60046	2.76273	9.6815e-174			g35093	4.34509	7.12339e-228			g24316	-1.35099	1.91253e-17
	g23668	1.43816	3.96173e-138			g12068	-5.87047	4.63521e-53			g18081	2.15629	9.59178e-202			g39962	2.45006	0			g13554	2.7614	1.07042e-143			g30191	4.33935	1.46662e-115			g61561	-1.35136	7.78239e-18
	g60720	1.43764	5.76264e-93			g43387	-5.90194	3.48006e-54			g60923	2.15235	1.09359e-279			g36161	2.44648	1.93488e-193			g48365	2.75609	3.20844e-172			g23254	4.32702	2.39755e-152			g34206	-1.35433	7.06437e-13
	g42642	1.4375	1.24785e-236			g54917	-6.03802	5.9636e-35			g59562	2.13907	2.7317e-300			g13218	2.4441	0			g25622	2.75267	1.73752e-184			g58046	4.30789	7.15773e-112			g26218	-1.35724	0.0152455
	g14702	1.4374	3.8737e-160			g34017	-6.06609	2.71108e-63			g30110	2.13646	2.4503e-117			g9017	2.43233	0			g8902	2.75266	5.9971e-111			g50545	4.30351	1.03339e-236			g46703	-1.36166	1
	g62	1.43555	0			g54419	-6.27249	1.10396e-37			g61119	2.13279	9.7091e-166			g59335	2.43005	1.51109e-296			g19675	2.75172	0			g57375	4.30038	1.36137e-132			g7151	-1.37859	2.69147e-15
	g31524	1.43462	2.27818e-47			g4104	-6.32139	8.854e-62			g37622	2.12619	1.83794e-289			g20151	2.42485	5.49497e-226			g54117	2.75075	6.47996e-161			g46541	4.29547	2.7576e-247			g30417	-1.38897	0.000967689
	g52228	1.43368	3.9319e-108			g54875	-6.71664	2.88965e-51			g17335	2.12434	5.01311e-54			g25461	2.42255	1.28426e-249			g58655	2.74818	2.36639e-232			g9008	4.29088	7.18773e-145			g9721	-1.39108	1.40814e-08
	g50447	1.43299	7.68741e-298								g17995	2.11204	6.6044e-277			g31588	2.41497	0			g19911	2.74752	2.41153e-139			g37807	4.2838	3.33211e-155			g16925	-1.39316	3.05016e-17
	g35004	1.43283	1.41628e-157								g17744	2.11071	2.62583e-256			g42466	2.40968	0			g45746	2.73872	2.97949e-106			g54685	4.25882	2.27884e-182			g58267	-1.40452	2.00617e-07
	g3967	1.43218	0								g9070	2.10936	7.06486e-214			g24298	2.39837	0			g44152	2.73306	6.53129e-229			g55210	4.23697	5.96216e-273			g37622	-1.40622	0.425781
	g23739	1.43052	8.92739e-286								g59399	2.10601	0			g26079	2.39671	0			g2378	2.72096	4.76258e-128			g67	4.21943	8.45434e-199			g53349	-1.41242	2.00115e-08
	g49612	1.42824	2.23746e-119								g17267	2.10197	0			g31501	2.38917	7.07019e-236			g54614	2.71672	1.10833e-126			g30159	4.21841	3.52119e-246			g25524	-1.4335	0.190043
	g9993	1.42812	1.20404e-97								g59630	2.09874	3.44719e-282			g45800	2.38883	1.87247e-219			g13381	2.7158	3.13343e-191			g33775	4.20601	1.4784e-217			g62593	-1.43518	1.51353e-11
	g29334	1.4267	7.35586e-112								g24300	2.09622	2.31284e-206			g43348	2.38793	0			g422	2.71506	1.93646e-76			g60825	4.16709	2.50559e-134			g17459	-1.44782	1.12371e-09
	g23972	1.42666	8.39647e-79								g62511	2.09546	5.7452e-112			g59823	2.38281	1.2428e-215			g29023	2.71463	4.52716e-235			g54354	4.16597	2.98008e-237			g5789	-1.44808	1.24473e-15
	g15752	1.42413	1.39303e-53								g39962	2.09308	0			g13696	2.38016	0			g42076	2.71161	4.33652e-221			g11498	4.14792	1.37111e-189			g54957	-1.45962	3.95908e-05
	g21517	1.42412	5.00219e-74								g39254	2.09122	1.66107e-127			g9108	2.37032	1.59271e-210			g39206	2.70931	1.97926e-102			g12646	4.13313	8.19305e-60			g30153	-1.46712	3.21886e-06
	g54359	1.42288	4.364e-239								g54325	2.09079	3.37616e-246			g4284	2.36925	0			g8426	2.70159	1.75249e-81			g18925	4.11631	1.93017e-246			g59035	-1.47448	4.7042e-11
	g1094	1.42247	3.55333e-68								g54454	2.08984	1.4955e-251			g34998	2.36787	1.82601e-288			g41105	2.69973	2.55359e-165			g46627	4.11464	1.58348e-106			g42843	-1.47627	0.0432396
	g9333	1.42243	1.88087e-48								g25960	2.08854	2.8645e-136			g20546	2.36651	7.23079e-206			g20736	2.69701	1.95149e-189			g17420	4.11159	7.49702e-234			g16912	-1.48714	5.41862e-05
	g5271	1.422	1.34496e-91								g41079	2.08679	1.70231e-143			g54117	2.36093	0			g60000	2.69352	5.59497e-100			g30579	4.10533	9.78462e-163			g50214	-1.49373	7.8452e-10
	g50425	1.41745	2.03747e-231								g42076	2.08466	0			g30337	2.35839	6.55414e-203			g24788	2.69311	4.26329e-171			g38332	4.10499	5.25356e-108			g9251	-1.5155	1.01136e-19
	g20621	1.41579	2.68041e-140								g26978	2.08276	5.93278e-222			g53040	2.35721	0			g9070	2.69132	1.96325e-141			g30582	4.10301	6.69958e-141			g25402	-1.51623	0.0447628
	g33235	1.41531	1.35454e-135								g40834	2.08075	0			g54654	2.34909	1.28362e-255			g42860	2.69098	2.72674e-116			g50524	4.10284	1.74696e-117			g333	-1.5284	7.31196e-18
	g43649	1.41485	1.17632e-51								g54377	2.07837	0			g10331	2.34197	0			g25524	2.68853	6.46787e-238			g16687	4.0978	1.89242e-262			g49933	-1.54354	2.95569e-13
	g34084	1.41375	1.10848e-123								g17446	2.07616	2.35437e-181			g50597	2.33522	9.07781e-301			g58883	2.68711	3.14953e-179			g436	4.08432	6.57726e-203			g30161	-1.54616	1.01827e-22
	g12175	1.41278	7.2206e-105								g61192	2.06846	1.56084e-218			g56127	2.32061	2.56527e-186			g22390	2.67785	5.01437e-101			g39499	4.08281	3.82434e-179			g38334	-1.56095	8.35625e-23
	g53064	1.41224	1.24249e-70								g16970	2.06536	4.02737e-151			g15665	2.31591	0			g59846	2.67766	1.52625e-188			g16790	4.05305	6.7776e-136			g23938	-1.566	1
	g46357	1.41167	1.17532e-85								g59566	2.06454	3.90498e-130			g43560	2.31183	2.77208e-248			g9331	2.67603	1.3021e-298			g20967	4.05257	9.3778e-179			g24793	-1.57988	1.37278e-08
	g17176	1.41074	4.1097e-50								g34017	2.06451	0			g47099	2.30327	0			g29963	2.66872	1.97108e-195			g34068	4.04898	9.67137e-90			g4441	-1.59141	3.13938e-07
	g8702	1.41043	4.03299e-57								g23469	2.06078	0			g33365	2.29046	4.53081e-263			g25314	2.66451	5.80558e-73			g42602	4.04593	3.32846e-176			g31185	-1.60722	3.04148e-08
	g25501	1.40997	1.14069e-45								g5401	2.06016	0			g35003	2.2899	0			g54420	2.66193	3.12694e-98			g54700	4.04158	2.94292e-205			g12656	-1.613	8.94413e-08
	g9018	1.40894	1.40144e-177								g35208	2.05977	0			g50910	2.28022	0			g20365	2.65973	4.25864e-185			g31080	4.0364	3.15626e-177			g61056	-1.61457	6.90519e-05
	g57671	1.4074	2.06024e-102								g33347	2.05932	8.01538e-123			g49471	2.27345	1.4512e-245			g60892	2.65788	8.25976e-103			g24348	4.03427	2.38687e-114			g34710	-1.61927	0.0005907
	g11866	1.40726	9.89914e-268								g12855	2.05244	3.37681e-139			g20528	2.27032	5.12012e-239			g832	2.65116	7.93348e-113			g59108	4.01877	1.07988e-127			g59700	-1.62922	0.0014912
	g721	1.40525	1.72423e-59								g26685	2.05176	0			g26813	2.25938	0			g5367	2.65043	2.27393e-122			g23677	4.01694	1.28662e-249			g53040	-1.68227	0.0809781
	g23854	1.40472	2.81802e-44								g20630	2.05038	2.13101e-176			g1065	2.25882	0			g15856	2.64218	2.24934e-121			g24438	4.00589	3.76977e-131			g31114	-1.6875	0.000138315
	g53218	1.40461	2.36568e-121								g46391	2.04995	5.69333e-120			g38650	2.25163	3.50373e-158			g20052	2.63867	2.82742e-113			g9071	4.0026	6.47902e-180			g27199	-1.68926	1.23428e-08
	g58019	1.40404	1.98695e-57								g60616	2.04911	1.83464e-136			g60684	2.2516	4.52362e-224			g42317	2.6359	6.57956e-191			g327	3.98435	4.24377e-172			g59	-1.73808	4.44058e-11
	g58859	1.40183	1.97115e-55								g13381	2.04821	1.8914e-215			g10186	2.23608	1.4178e-227			g28945	2.63536	6.04701e-217			g42692	3.98407	3.68223e-115			g43386	-1.77251	8.56204e-12
	g20623	1.40042	1.99293e-145								g25435	2.04784	0			g48426	2.23088	0			g58790	2.63469	1.00152e-135			g16788	3.95111	7.77281e-137			g42791	-1.77803	1.82234e-07
	g55622	1.40009	5.7683e-231								g24709	2.04779	7.80512e-142			g30398	2.23071	0			g153	2.63133	1.31517e-185			g8942	3.95105	2.29204e-147			g4987	-1.77921	1.36319e-06
	g24370	1.39977	9.07336e-285								g63816	2.04695	1.92024e-258			g19911	2.22924	9.35808e-251			g50493	2.62811	6.43633e-72			g24947	3.94891	3.94565e-239			g26783	-1.80986	4.85705e-07
	g21576	1.39876	1.84367e-148								g13554	2.0426	1.07449e-224			g37044	2.21785	0			g31379	2.62804	2.37422e-289			g13271	3.94704	8.13605e-160			g4086	-1.82101	1.51955e-08
	g55675	1.39786	0								g36868	2.04047	0			g50612	2.21213	1.01621e-294			g15672	2.61927	2.71874e-96			g9717	3.93796	4.8355e-184			g16958	-1.83976	1.61825e-26
	g20741	1.39518	6.01608e-55								g5088	2.03686	0			g30331	2.21128	9.9566e-230			g1488	2.61857	1.21514e-78			g647	3.91068	2.36336e-162			g34037	-1.87268	1.24088e-06
	g54710	1.39413	5.1446e-89								g61193	2.03498	2.4745e-277			g30485	2.20687	1.03008e-181			g25360	2.61407	2.34084e-177			g29788	3.90944	9.75266e-190			g61020	-1.90507	3.66791e-12
	g59409	1.39281	2.29352e-54								g47637	2.03467	0			g13908	2.20507	9.62952e-263			g61253	2.61065	5.78968e-184			g1107	3.90186	1.23043e-96			g53926	-1.91374	1.25106e-06
	g55787	1.3924	2.06691e-77								g42466	2.03461	0			g43368	2.20432	3.98573e-224			g24298	2.60955	2.33846e-199			g13072	3.90042	5.76862e-198			g876	-1.9241	4.3357e-07
	g16912	1.39167	1.25041e-110								g33468	2.03351	1.55843e-279			g16931	2.20091	4.00074e-195			g59823	2.60576	5.41124e-93			g31074	3.89857	5.2502e-161			g17481	-1.96755	3.19942e-06
	g58036	1.39085	2.88071e-128								g24090	2.03318	4.34263e-262			g50146	2.19927	0			g60051	2.60478	4.89314e-75			g20831	3.88923	1.19584e-224			g24298	-1.96853	8.84085e-14
	g60681	1.38998	1.13335e-45								g29300	2.03237	1.59221e-113			g22390	2.19554	2.94621e-182			g5513	2.59943	1.93169e-87			g43309	3.88421	5.23072e-89			g16805	-1.96882	1.86034e-11
	g60867	1.38912	1.76827e-95								g30825	2.02957	0			g9070	2.19218	7.16146e-277			g35003	2.59247	5.75916e-171			g29596	3.87831	1.58637e-191			g3803	-1.9809	4.86706e-22
	g33489	1.3887	7.99843e-301								g19911	2.02946	1.26875e-184			g20550	2.1909	9.5903e-244			g38193	2.5885	1.67617e-207			g9068	3.87668	5.2411e-187			g3899	-1.98442	1.46686e-05
	g55198	1.38702	5.67386e-166								g60135	2.02899	0			g31379	2.18907	0			g13270	2.58688	4.76378e-80			g15521	3.87555	4.80019e-42			g36358	-2.04567	1.94346e-11
	g15620	1.38375	6.79851e-59								g20736	2.02886	6.03403e-250			g48102	2.18777	0			g60068	2.58583	3.28906e-133			g24330	3.87302	1.87256e-164			g23981	-2.07366	1.4351e-12
	g9721	1.3835	6.96519e-133								g14524	2.02066	3.22999e-109			g61576	2.18653	0			g1029	2.58462	2.45072e-90			g15993	3.86233	1.76124e-165			g24655	-2.10389	5.11971e-09
	g43435	1.38289	1.01042e-112								g5367	2.01962	1.22292e-175			g37613	2.18587	0			g12012	2.57734	3.92101e-233			g17317	3.85456	5.71345e-151			g400	-2.25995	2.97321e-08
	g62112	1.38186	1.93703e-123								g45746	2.01827	6.62448e-157			g42099	2.18077	0			g25710	2.57573	1.45823e-255			g42323	3.85218	1.94039e-161			g46681	-2.31344	2.10026e-08
	g34447	1.38105	1.62547e-156								g25662	2.01808	0			g59483	2.17813	0			g29099	2.57334	8.22057e-87			g55251	3.84815	5.22275e-220			g41713	-2.32006	1.14444e-10
	g16874	1.38035	1.34338e-80								g59700	2.01709	1.57147e-138			g26783	2.17707	5.29277e-302			g41994	2.57224	5.77647e-77			g4558	3.83281	6.66177e-150			g12825	-2.32885	9.59674e-06
	g12238	1.37753	3.89007e-85								g34807	2.01497	5.51029e-111			g61119	2.17518	2.40718e-211			g33083	2.56845	1.92538e-179			g41697	3.83273	8.24287e-104			g26079	-2.42903	9.36656e-13
	g46681	1.37745	9.11932e-94								g25488	2.01268	2.01464e-161			g16681	2.17105	1.26494e-200			g17980	2.55382	8.70486e-121			g60700	3.82964	7.86713e-150			g61043	-2.48328	1.45051e-09
	g24059	1.37697	2.57401e-105								g2575	2.01186	2.02646e-136			g35440	2.16729	2.24476e-232			g11909	2.55196	6.67369e-185			g42095	3.82402	6.99085e-195			g38960	-2.53484	1.17376e-08
	g37881	1.37592	3.75144e-53								g40777	2.00874	1.59434e-237			g46798	2.15824	0			g30337	2.53864	3.85618e-78			g55159	3.8235	2.4054e-103			g30825	-2.83744	9.44009e-05
	g4987	1.37477	1.38681e-67								g161	2.00433	3.45926e-109			g50945	2.15439	1.74897e-193			g15665	2.5352	6.01206e-143			g49242	3.8171	9.49056e-98			g20600	-2.85325	0.000109874
	g30434	1.37197	6.03086e-46								g1105	2.00413	1.43619e-174			g46570	2.15056	0			g34127	2.52559	5.69863e-202			g54713	3.81097	3.04445e-188			g30857	-2.97028	8.14782e-10
	g35068	1.37008	1.09981e-64								g61121	1.99956	2.92924e-287			g5367	2.1487	2.7625e-221			g50614	2.52069	2.52461e-246			g42597	3.80905	1.17806e-120			g34092	-3.07379	7.88808e-14
	g33567	1.36987	5.33305e-243								g54303	1.99794	2.74921e-162			g45746	2.14627	2.70729e-200			g1065	2.51963	3.23493e-227			g34531	3.80828	1.24458e-165			g35170	-3.31925	2.92501e-07
	g37880	1.36816	5.49076e-95								g56005	1.99465	5.28548e-231			g832	2.1443	8.64687e-212			g31265	2.51468	4.45068e-70			g4405	3.79321	1.85082e-152			g37350	-3.37008	1.26443e-06
	g59503	1.36777	4.0974e-69								g25764	1.99369	0			g55713	2.14172	1.21706e-220			g29401	2.50785	3.2498e-105			g60808	3.78166	8.62183e-86			g56819	-3.51999	2.41626e-10
	g21004	1.36607	1.65654e-231								g7087	1.99349	1.86825e-151			g50614	2.13985	0			g30521	2.50521	9.74935e-107			g18923	3.77926	4.70263e-136			g8434	-3.5341	4.7493e-08
	g23730	1.36536	2.63822e-50								g18764	1.99323	5.64409e-144			g35850	2.13077	2.34245e-185			g50526	2.50372	2.06067e-90			g52836	3.77778	6.58486e-94			g59143	-3.65652	2.3299e-14
	g37944	1.36434	0								g38193	1.99094	0			g25082	2.12569	1.10771e-126			g31053	2.50014	2.72064e-80			g37613	3.77393	3.79844e-142			g24584	-3.68641	1.44092e-09
	g16994	1.36388	5.50974e-49								g50222	1.98705	0			g25352	2.12259	1.43093e-129			g16560	2.49846	4.30279e-100			g49304	3.77138	1.91636e-153			g34017	-3.72105	1.01314e-12
	g47266	1.36102	5.1094e-48								g60230	1.98	9.46013e-254			g42910	2.12223	0			g43210	2.49748	1.26845e-140			g16369	3.76652	5.34583e-191			g52924	-3.82109	4.10561e-09
	g34209	1.35886	1.78621e-117								g10102	1.97946	0			g60384	2.11816	2.27912e-228			g46330	2.49059	4.3831e-208			g38946	3.76394	1.1457e-151			g25764	-4.1122	2.5093e-09
	g25184	1.35709	2.58849e-53								g24665	1.97933	3.26989e-115			g42860	2.11801	1.07858e-190			g28562	2.47897	7.8169e-113			g29917	3.76165	6.02824e-163			g4547	-4.45402	6.56241e-09
	g14633	1.35394	4.66924e-71								g34157	1.97897	2.90758e-123			g12825	2.11313	1.97748e-218			g23265	2.47891	4.22515e-105			g60395	3.74706	1.08287e-138			g63628	-4.47497	1.40603e-11
	g5789	1.35366	2.21212e-227								g25230	1.97387	4.50037e-224			g49977	2.10996	1.75315e-174			g59483	2.47399	1.67941e-248			g32830	3.74168	4.56393e-153			g12068	-4.55438	9.18161e-11
	g13792	1.35328	2.49066e-128								g30922	1.97361	6.32006e-100			g26912	2.10857	2.7102e-185			g60384	2.46933	8.76643e-121			g24353	3.73916	2.10041e-161			g4104	-4.72603	1.06809e-11
	g42084	1.35326	1.49824e-263								g25400	1.97321	2.13979e-119			g5036	2.10764	4.90843e-175			g31501	2.46398	1.10081e-77			g19288	3.73819	2.7756e-237			g54917	-4.881	2.12006e-09
	g9051	1.3527	2.54539e-54								g29829	1.97078	3.16046e-150			g53750	2.09928	3.04307e-230			g18764	2.46212	9.8352e-101			g43227	3.73596	1.47145e-206			g43387	-5.47296	1.78508e-12
	g60710	1.35266	8.04792e-82								g33592	1.97077	2.11616e-301			g49453	2.09881	1.46033e-203			g13908	2.45491	7.79786e-124			g5141	3.72199	1.21163e-200			g54419	-5.52719	8.85157e-06
	g24977	1.35241	0								g25441	1.97062	1.37986e-121			g54703	2.09484	1.25282e-265			g30658	2.45397	2.11523e-189			g11506	3.71116	3.66884e-214
	g24063	1.35104	3.31762e-251								g15915	1.97016	1.22987e-199			g30344	2.08795	7.85609e-220			g48449	2.45202	4.81545e-169			g13436	3.70806	2.56856e-96
	g53721	1.35087	5.5805e-201								g3046	1.96997	2.54832e-151			g30519	2.0832	4.30204e-211			g57924	2.44421	3.47506e-97			g14046	3.69341	2.51088e-127
	g1290	1.35062	7.66204e-89								g9776	1.96675	1.86015e-283			g13381	2.08229	0			g33844	2.43904	3.28347e-90			g29259	3.68503	7.31029e-161
	g59925	1.35061	2.8915e-63								g20600	1.9641	0			g14190	2.07948	1.05171e-132			g42477	2.42503	1.52315e-279			g52911	3.68203	1.327e-134
	g31189	1.34872	5.66769e-221								g26079	1.95573	0			g13316	2.0789	0			g54220	2.42246	9.99942e-159			g31037	3.68132	3.98471e-73
	g26067	1.3479	2.75983e-37								g30487	1.95557	0			g55289	2.07556	3.92575e-160			g9108	2.42162	2.28418e-86			g55665	3.66231	5.9634e-130
	g60543	1.34606	1.95059e-138								g23686	1.95247	2.5818e-169			g51085	2.07309	0			g49977	2.41019	2.2546e-97			g25751	3.65914	5.77261e-156
	g381	1.34529	1.37987e-73								g42477	1.95198	0			g38246	2.07025	3.39625e-276			g54377	2.40201	1.18364e-283			g38991	3.64816	4.12381e-133
	g867	1.34514	2.95648e-214								g9381	1.94962	3.49849e-206			g57924	2.06911	6.86671e-172			g10997	2.39691	9.79933e-204			g5407	3.64368	2.94266e-96
	g5555	1.34506	4.07713e-78								g20828	1.94893	7.50802e-199			g13163	2.06443	0			g39779	2.39342	6.93815e-82			g13246	3.63959	6.21479e-96
	g47123	1.34172	5.3362e-95								g5396	1.9418	0			g39324	2.06228	1.74011e-116			g29221	2.3917	3.76933e-123			g50426	3.63504	5.93007e-130
	g54957	1.34087	1.80653e-72								g54744	1.93764	3.51421e-207			g29842	2.05757	0			g50356	2.38735	2.54744e-83			g9043	3.63392	1.73422e-117
	g29200	1.33959	2.26881e-61								g60440	1.93614	5.70603e-195			g43714	2.05025	0			g2575	2.38172	3.99469e-75			g25435	3.62438	1.48068e-185
	g12836	1.3392	7.83229e-101								g38163	1.93457	1.28015e-127			g54321	2.04983	0			g26627	2.3799	3.64602e-122			g56456	3.62304	1.3826e-180
	g15279	1.3387	8.54576e-59								g25789	1.9337	9.09677e-274			g13833	2.04305	2.02461e-138			g57960	2.37913	2.37584e-275			g19671	3.62301	1.12553e-227
	g20702	1.33848	8.16986e-87								g54820	1.9334	0			g184	2.03787	0			g9017	2.37829	1.62192e-110			g59815	3.61795	2.46477e-114
	g35236	1.33625	1.70975e-83								g51141	1.93289	3.30389e-159			g5513	2.03197	9.71393e-164			g20828	2.3717	1.12194e-132			g13389	3.61622	5.2019e-174
	g57015	1.33579	1.3613e-149								g60384	1.92965	2.22115e-154			g35170	2.01445	0			g61107	2.36185	3.12774e-198			g20587	3.61252	4.63779e-91
	g5003	1.33555	3.80622e-93								g29755	1.9226	0			g31610	2.01414	0			g48426	2.35927	4.61942e-274			g32296	3.60812	2.41308e-107
	g20526	1.33325	2.28885e-128								g4812	1.92224	2.59286e-133			g60051	2.01141	2.56889e-116			g53292	2.34865	5.45751e-121			g42661	3.59574	1.10424e-172
	g33990	1.33182	6.15247e-58								g60530	1.91976	0			g53642	2.00986	3.1816e-191			g13548	2.33764	1.37057e-158			g174	3.59452	2.28338e-146
	g13303	1.3315	9.35094e-138								g14100	1.91943	1.68631e-301			g60068	2.00963	7.18324e-191			g1199	2.33728	3.22237e-105			g20171	3.59226	1.30385e-97
	g24592	1.32862	2.99003e-132								g10924	1.91927	2.16897e-167			g47819	2.00782	0			g25937	2.33589	5.34972e-84			g46242	3.59122	7.72482e-147
	g57145	1.32775	4.56827e-77								g49470	1.91841	2.32203e-280			g49216	2.00438	1.03496e-113			g4812	2.33542	7.06903e-97			g58979	3.58516	1.73771e-165
	g24978	1.32528	4.15616e-76								g34467	1.91742	0			g12152	1.99772	0			g42910	2.32436	1.62754e-175			g20968	3.58089	1.48996e-132
	g42735	1.3242	3.17711e-60								g34592	1.91689	7.0098e-221			g59544	1.99757	2.40506e-122			g37055	2.32423	1.06352e-148			g10820	3.58055	1.90948e-75
	g38686	1.32345	1.08237e-69								g20584	1.91246	1.22137e-202			g3926	1.99537	7.43879e-158			g58342	2.32422	4.02868e-156			g63890	3.56843	9.65705e-167
	g59648	1.32186	0								g21485	1.90689	0			g38193	1.99056	5.34355e-265			g16970	2.31154	6.21555e-74			g38168	3.56364	1.20092e-165
	g26512	1.32115	3.21164e-49								g12527	1.9038	4.77809e-127			g29332	1.99017	1.21822e-195			g24062	2.30388	4.54278e-88			g43235	3.5593	9.86583e-117
	g59454	1.3194	3.33636e-58								g46241	1.90367	1.03865e-155			g26627	1.98653	3.05562e-200			g39207	2.29892	5.78961e-73			g496	3.55363	5.6762e-115
	g32106	1.31895	0								g43910	1.90315	1.88597e-77			g11677	1.98617	0			g13218	2.29487	4.9721e-139			g35357	3.55122	8.71764e-185
	g9137	1.31812	9.37722e-79								g58356	1.90291	9.71802e-129			g46703	1.96941	6.66945e-200			g20528	2.29131	4.91696e-88			g1410	3.55118	4.748e-137
	g332	1.31704	1.63341e-91								g36402	1.90255	1.10916e-184			g40134	1.9682	6.24503e-145			g29833	2.28525	7.74597e-277			g30656	3.54221	1.56783e-123
	g13592	1.31563	7.25548e-247								g34097	1.90068	4.28249e-208			g49054	1.96512	1.98298e-163			g49054	2.28445	4.77303e-85			g30791	3.5317	1.22339e-202
	g52957	1.31451	1.4901e-66								g521	1.8988	6.04095e-104			g59143	1.96469	0			g59226	2.28339	4.98013e-139			g4344	3.52587	2.73566e-146
	g59505	1.3136	1.44032e-228								g61576	1.89719	4.04437e-205			g20828	1.96361	2.41451e-218			g53665	2.27667	4.7165e-114			g30960	3.51839	7.31029e-185
	g18506	1.31259	1.32212e-171								g35035	1.89677	1.62714e-103			g42076	1.96224	1.9651e-302			g184	2.27536	1.59961e-241			g31268	3.50542	3.15657e-132
	g50602	1.31223	4.75955e-73								g29437	1.89518	0			g22828	1.96217	0			g30519	2.27394	1.73516e-108			g22828	3.50131	2.19376e-196
	g54350	1.31218	0								g46400	1.89505	1.2764e-104			g7510	1.9602	1.67516e-158			g62179	2.27174	8.58012e-81			g53962	3.49409	3.50258e-139
	g54465	1.30989	3.31772e-210								g53040	1.89199	0			g23743	1.95868	4.63363e-101			g45800	2.26918	3.02882e-64			g16835	3.4897	2.24573e-96
	g28548	1.30987	2.16879e-72								g24627	1.89012	0			g43366	1.95248	0			g51050	2.26589	7.07431e-179			g59947	3.48474	9.95756e-160
	g29818	1.30776	9.65486e-51								g13864	1.88789	1.8142e-297			g16054	1.94905	4.47264e-164			g43226	2.26517	9.80835e-78			g31073	3.48433	3.02447e-132
	g33877	1.30668	4.42449e-118								g29447	1.88441	1.26407e-245			g20497	1.94664	1.47765e-232			g16054	2.25509	8.72845e-83			g20436	3.4808	3.77841e-115
	g42372	1.304	3.2118e-58								g39404	1.87465	7.52806e-129			g4973	1.94534	0			g24522	2.25403	3.53669e-93			g1235	3.47986	2.40475e-140
	g17181	1.30383	1.72512e-85								g30848	1.87438	6.37482e-157			g58144	1.94236	6.39022e-204			g40777	2.25201	4.46274e-118			g43804	3.47735	2.95168e-102
	g30155	1.30334	6.17746e-213								g55304	1.87399	2.26254e-211			g4525	1.93965	9.95854e-162			g33892	2.25088	9.34362e-164			g25085	3.47496	2.80475e-80
	g54397	1.30276	1.81535e-291								g30836	1.87306	1.08399e-116			g43231	1.93888	2.47456e-232			g34807	2.24998	2.34043e-51			g13241	3.46912	7.24127e-99
	g27011	1.30247	1.84454e-95								g31704	1.87187	0			g30460	1.93785	5.67965e-172			g19443	2.24215	4.07311e-72			g1642	3.46702	1.36471e-64
	g48023	1.30207	3.51875e-56								g10876	1.87125	7.72731e-119			g18764	1.93752	8.93404e-143			g49471	2.22552	2.59562e-88			g25529	3.46604	1.84931e-72
	g9078	1.30206	1.77179e-235								g39980	1.8708	1.37546e-222			g13554	1.9369	1.6901e-200			g13316	2.22428	0			g29828	3.46518	4.26029e-169
	g15692	1.30181	5.11762e-118								g9247	1.86788	1.22942e-269			g38199	1.9348	5.54922e-200			g54321	2.2209	5.56698e-200			g5146	3.46304	3.06682e-181
	g11793	1.29779	1.20056e-67								g59335	1.86766	1.36168e-149			g42512	1.93463	3.73268e-247			g1171	2.21913	3.60742e-105			g55085	3.45393	4.43416e-153
	g37262	1.29573	7.50647e-107								g39758	1.86545	6.27811e-187			g47172	1.93189	1.05382e-286			g20546	2.21825	1.15765e-64			g41427	3.44876	1.28241e-121
	g30850	1.29541	3.06909e-281								g17339	1.86388	4.12093e-174			g13276	1.92831	4.10892e-151			g39254	2.21766	1.77023e-67			g59912	3.4346	7.12074e-55
	g54857	1.29201	1.48872e-88								g25066	1.8635	6.17514e-183			g42999	1.92394	1.26062e-212			g20663	2.21363	2.43545e-169			g31621	3.43277	2.90736e-82
	g61672	1.29165	8.60358e-172								g39207	1.86179	9.78327e-96			g20736	1.91848	9.49875e-246			g30331	2.21263	5.93568e-96			g53892	3.42416	1.32833e-99
	g29483	1.28944	6.04749e-122								g57587	1.86153	0			g4088	1.91641	1.62182e-257			g11808	2.20458	4.11844e-81			g4396	3.42188	3.14344e-178
	g25698	1.28907	3.04662e-80								g14722	1.8591	3.32424e-129			g30105	1.91142	1.17839e-228			g20550	2.20345	1.05345e-93			g38680	3.4144	8.12567e-76
	g19337	1.2873	4.05086e-109								g54614	1.85769	2.80837e-148			g20663	1.9079	8.34986e-287			g43367	2.20233	9.02416e-73			g38347	3.41422	1.97695e-65
	g43049	1.28715	1.81436e-91								g16836	1.84991	0			g43972	1.90294	1.8868e-185			g55284	2.20198	4.12609e-104			g37637	3.41364	5.69901e-70
	g58903	1.28625	7.69966e-124								g31361	1.8472	0			g25165	1.89307	1.31933e-157			g60230	2.20113	6.34983e-146			g20818	3.39178	2.6061e-74
	g26761	1.28577	1.97484e-179								g24585	1.84706	0			g28945	1.87986	3.32537e-293			g31610	2.19831	1.96721e-181			g59659	3.38927	1.00944e-155
	g42779	1.28531	1.94106e-110								g47391	1.84705	3.15596e-142			g5655	1.8751	4.9013e-199			g59652	2.19219	1.04016e-103			g3669	3.38659	4.43737e-131
	g53807	1.28412	1.73302e-79								g9396	1.8466	8.14748e-174			g31168	1.86861	6.52505e-137			g40834	2.18883	2.42789e-163			g30070	3.37902	6.38868e-122
	g52942	1.28358	5.63295e-93								g20583	1.84653	1.36808e-192			g29555	1.86785	5.46714e-197			g55289	2.1876	1.37353e-64			g31152	3.37623	1.09422e-83
	g24401	1.28333	8.11459e-165								g20448	1.84539	0			g30917	1.86713	2.08632e-102			g16931	2.1839	3.37783e-74			g35800	3.37199	2.90649e-81
	g51349	1.28226	5.36718e-116								g50614	1.84124	0			g60616	1.86667	9.98614e-156			g53750	2.18297	6.00798e-116			g19518	3.37149	1.25255e-161
	g13183	1.2814	4.1718e-86								g9936	1.83867	0			g29094	1.86627	5.00786e-166			g54155	2.18252	5.02952e-223			g41670	3.36342	1.80948e-119
	g64097	1.28029	1.76805e-263								g57652	1.83833	6.27521e-136			g53978	1.86593	1.09128e-120			g55713	2.18203	4.10169e-97			g42794	3.36116	3.76625e-71
	g29087	1.27965	4.93823e-95								g42502	1.83471	0			g7736	1.86499	1.25606e-166			g51565	2.17275	2.96167e-89			g3586	3.35915	5.8062e-69
	g58990	1.27949	3.87208e-108								g29434	1.83348	4.18941e-118			g59654	1.86219	1.21947e-288			g51141	2.17231	3.19223e-80			g4931	3.35899	3.38667e-141
	g23932	1.27847	6.15694e-89								g9108	1.83202	3.77787e-109			g10066	1.8607	4.079e-96			g56127	2.16126	1.93328e-47			g31079	3.35866	3.74856e-133
	g60970	1.27747	3.10697e-193								g34543	1.83053	2.41498e-220			g29841	1.85166	0			g47681	2.15569	3.04533e-109			g54599	3.35552	5.01242e-133
	g41630	1.27645	1.33557e-90								g43227	1.8273	1.2763e-115			g40106	1.85086	7.67382e-124			g30398	2.15137	3.36435e-181			g59809	3.34951	1.03596e-131
	g50488	1.27263	4.99836e-79								g34998	1.82454	1.16682e-159			g42077	1.845	5.70171e-267			g12152	2.14678	8.50666e-244			g9086	3.34785	4.60681e-107
	g10265	1.27195	1.37318e-96								g5513	1.82291	1.27033e-106			g25682	1.84415	1.82375e-204			g50529	2.14335	8.53202e-46			g4419	3.34003	9.07206e-152
	g497	1.27171	5.41281e-135								g31379	1.82279	0			g23367	1.84098	5.0016e-88			g55304	2.14125	1.79965e-130			g40167	3.33864	1.11638e-105
	g30995	1.27083	1.95355e-177								g60387	1.82258	2.07359e-291			g43966	1.83729	1.0195e-180			g13276	2.14071	1.11945e-71			g20607	3.33656	1.10218e-91
	g26774	1.26903	2.9767e-197								g17365	1.8201	2.18203e-206			g58297	1.8271	2.63164e-237			g30344	2.13962	9.02856e-95			g59214	3.33476	1.41508e-132
	g38959	1.2687	4.32453e-221								g58844	1.8184	1.05034e-164			g25524	1.8209	0			g35440	2.13651	1.40798e-80			g27623	3.32751	1.53422e-130
	g1634	1.26677	1.10629e-59								g50574	1.81751	4.77554e-204			g53496	1.82008	4.87688e-143			g25662	2.136	8.7444e-140			g34696	3.32591	8.63141e-103
	g58891	1.26666	1.7469e-46								g20371	1.81643	6.46862e-137			g55678	1.8161	1.46105e-111			g30460	2.13491	1.42914e-82			g59749	3.32049	1.32873e-126
	g49604	1.26388	6.69055e-57								g5344	1.81255	0			g58791	1.81354	8.74405e-110			g54344	2.13262	4.44848e-147			g60837	3.31797	8.04033e-133
	g54885	1.26239	3.17185e-164								g47203	1.81255	1.06171e-264			g17056	1.81141	1.01468e-142			g26912	2.13036	5.48553e-74			g54155	3.31114	4.31752e-202
	g30153	1.26127	4.84755e-116								g24415	1.80914	1.82979e-248			g62179	1.81008	5.77154e-143			g26747	2.12678	6.95499e-117			g17271	3.30726	2.84741e-139
	g26780	1.25923	1.71427e-84								g54282	1.80261	7.13768e-106			g20840	1.80645	0			g12449	2.12659	1.3315e-69			g59707	3.30719	2.29772e-141
	g10027	1.25901	8.85605e-214								g13242	1.80195	6.76982e-93			g53665	1.80383	6.63558e-176			g50945	2.12616	3.42897e-61			g33703	3.3033	8.046e-119
	g38683	1.25808	2.11395e-153								g14945	1.79801	1.61945e-148			g17583	1.80051	7.56149e-108			g14294	2.12555	8.38997e-217			g41948	3.29583	2.15101e-131
	g59502	1.25773	4.28466e-87								g27170	1.79696	2.04679e-198			g5389	1.79701	9.39463e-116			g49453	2.10682	9.8798e-70			g60776	3.29247	1.20234e-84
	g58847	1.25432	2.19303e-56								g5098	1.79638	0			g1311	1.79401	0			g45843	2.10246	5.09886e-84			g61054	3.2865	1.00834e-128
	g29422	1.25269	3.22694e-62								g42771	1.79491	0			g8733	1.79339	5.08076e-181			g55531	2.10237	5.88454e-76			g60407	3.28409	3.53411e-86
	g60513	1.25122	1.10225e-88								g50529	1.78963	4.50996e-77			g19518	1.78884	1.48062e-285			g29755	2.09974	5.24388e-189			g1109	3.28314	7.9677e-144
	g31082	1.2497	3.76083e-54								g3848	1.7892	1.12282e-92			g32516	1.78826	3.26505e-105			g8286	2.09687	1.17722e-53			g47082	3.27727	1.29454e-125
	g9194	1.24946	1.15673e-263								g60069	1.78851	5.88198e-107			g30139	1.78791	9.06384e-190			g651	2.09071	8.99162e-69			g54847	3.27698	1.96464e-154
	g28351	1.24849	3.93547e-93								g16369	1.78646	0			g42477	1.78333	0			g10924	2.09017	4.84484e-84			g20377	3.27692	2.3438e-165
	g11686	1.24626	7.13025e-73								g9851	1.78371	1.89275e-89			g62134	1.7783	6.34463e-120			g58284	2.08874	1.00067e-50			g9531	3.27614	3.11534e-86
	g33780	1.24493	2.34989e-95								g337	1.78267	6.03543e-207			g59096	1.77695	2.71089e-199			g58356	2.08835	1.33414e-92			g57308	3.27369	1.20816e-105
	g8476	1.24448	1.68112e-124								g54117	1.78033	4.87546e-135			g58790	1.77606	2.50925e-175			g4088	2.08794	2.36163e-119			g54299	3.27336	9.07041e-95
	g60246	1.24447	1.06878e-118								g51198	1.77905	1.47689e-163			g39207	1.77364	7.54078e-123			g59972	2.0868	1.04792e-91			g4595	3.27207	2.34474e-85
	g51191	1.24283	1.1758e-47								g832	1.77772	5.83251e-113			g35279	1.77043	3.17276e-280			g25441	2.08595	1.45834e-70			g25619	3.26753	9.43157e-66
	g20676	1.24166	1.57306e-224								g57577	1.77764	2.28663e-246			g63869	1.76775	2.79819e-127			g42077	2.08511	2.40021e-141			g46388	3.25441	1.247e-130
	g63907	1.24141	2.45364e-162								g55238	1.77701	8.07403e-198			g47681	1.76575	1.84702e-186			g46798	2.07923	8.66465e-191			g19538	3.25291	4.68902e-133
	g58198	1.24057	7.81952e-47								g59458	1.77589	3.82863e-120			g54334	1.76491	4.09922e-109			g12825	2.07827	1.47646e-77			g29787	3.24327	3.09208e-80
	g25976	1.24019	6.38188e-171								g16780	1.77579	6.9281e-167			g58792	1.76005	6.74742e-236			g25230	2.07782	7.94322e-138			g5064	3.24201	1.39427e-69
	g8923	1.23655	1.62439e-143								g29104	1.77437	2.96748e-268			g30454	1.75936	3.02243e-144			g43231	2.07341	1.19504e-137			g21705	3.23634	2.97294e-110
	g19770	1.23613	2.78037e-211								g34520	1.77423	0			g60523	1.75771	7.69286e-98			g29842	2.07324	7.65053e-116			g61091	3.23604	4.29801e-82
	g26888	1.23384	1.38499e-51								g42860	1.76801	2.62014e-112			g51025	1.7577	0			g43658	2.06975	1.10752e-99			g15984	3.23099	4.13008e-73
	g25356	1.23163	6.63526e-55								g58165	1.76723	0			g57168	1.75366	1.14964e-140			g12574	2.06895	3.00407e-80			g59223	3.22928	1.95928e-99
	g41887	1.22989	4.13289e-72								g12844	1.76297	1.85507e-79			g60470	1.75315	2.59755e-209			g59746	2.06884	9.94933e-223			g28934	3.21561	7.66509e-103
	g55098	1.22883	7.8459e-87								g60019	1.76193	1.5755e-125			g29514	1.7522	7.29295e-99			g38656	2.0688	1.78845e-116			g806	3.21307	4.35906e-58
	g42657	1.22797	3.80945e-207								g13555	1.7609	4.55769e-98			g4783	1.75121	4.72725e-106			g43972	2.0679	4.73112e-91			g28911	3.20877	3.47711e-130
	g38247	1.22726	9.73422e-41								g31626	1.75884	0			g61579	1.74133	0			g30485	2.05875	2.29277e-66			g59097	3.20704	3.22169e-96
	g47244	1.22471	1.7198e-146								g6094	1.75565	3.3087e-184			g58139	1.73381	0			g9401	2.05807	1.68248e-73			g14398	3.2039	1.2675e-167
	g7782	1.22399	1.86894e-43								g54767	1.75375	1.71525e-95			g43232	1.7303	9.38394e-193			g63816	2.04929	1.09383e-158			g30851	3.1995	1.54514e-159
	g63877	1.22272	3.27114e-284								g7168	1.75222	3.49466e-178			g58376	1.72902	4.04351e-239			g60616	2.04756	6.58492e-74			g59746	3.19802	2.77682e-138
	g60555	1.22254	3.40526e-40								g55227	1.74953	0			g35727	1.72868	7.61029e-301			g23686	2.04609	3.44875e-85			g42024	3.19413	7.99106e-180
	g8934	1.22244	1.17748e-78								g59092	1.746	3.00119e-93			g42079	1.7258	1.4438e-237			g17446	2.04481	2.68597e-67			g14390	3.194	6.22207e-170
	g35037	1.21979	2.79893e-95								g58887	1.746	6.27111e-78			g40271	1.72546	9.40639e-125			g629	2.04415	9.57655e-66			g17796	3.19053	8.08801e-58
	g29378	1.21835	3.28378e-103								g60392	1.742	5.54951e-115			g30333	1.72302	5.86898e-295			g41935	2.04249	1.11137e-98			g42620	3.17864	7.65318e-122
	g33880	1.21571	7.83702e-192								g20410	1.74133	1.57062e-151			g42946	1.71971	1.16154e-103			g46703	2.04121	4.97352e-95			g17304	3.1707	8.59602e-77
	g17392	1.21382	3.50596e-89								g49977	1.74122	1.71281e-105			g17371	1.7182	7.23413e-117			g29076	2.03249	3.80594e-84			g34155	3.16965	3.32397e-136
	g7690	1.21163	4.02849e-77								g63719	1.73655	8.00513e-163			g30596	1.71388	1.97692e-132			g30139	2.02669	6.69708e-92			g6427	3.15775	6.23083e-79
	g34549	1.20993	2.77669e-273								g31174	1.73423	1.5931e-66			g59389	1.71154	3.33593e-102			g25066	2.01778	2.14581e-78			g13598	3.1576	1.74779e-101
	g14242	1.20988	6.00584e-71								g61402	1.73365	2.63532e-160			g58356	1.71127	1.48878e-171			g42383	2.01774	1.46751e-93			g30948	3.15583	6.56829e-74
	g20715	1.20964	3.73678e-217								g54784	1.73146	2.06443e-269			g12012	1.70971	2.35113e-249			g59399	2.01283	2.02515e-182			g1129	3.15177	9.65887e-119
	g1852	1.20926	1.48367e-58								g54846	1.73066	4.03064e-196			g15856	1.7079	4.31757e-153			g35097	2.01087	3.51671e-108			g19795	3.1475	1.63983e-117
	g55219	1.20846	7.83665e-60								g43457	1.72925	0			g24788	1.70456	5.15104e-178			g46336	2.00695	6.9595e-112			g9887	3.14598	2.80222e-108
	g19690	1.20422	2.87605e-104								g51374	1.7251	3.62862e-236			g52724	1.70382	3.88529e-263			g10876	2.00664	1.50897e-60			g16990	3.14117	5.52395e-157
	g25019	1.20299	1.73063e-66								g54084	1.72509	8.2731e-179			g27237	1.70059	1.28298e-83			g43232	2.00319	3.0824e-115			g63872	3.13893	1.75084e-72
	g38646	1.20283	1.40869e-123								g54255	1.72461	1.0915e-162			g49799	1.69858	3.63037e-70			g46847	2.0018	9.29674e-80			g61191	3.13393	1.92118e-65
	g34019	1.20179	7.28906e-139								g53665	1.72263	4.82127e-147			g13666	1.69759	8.38069e-108			g59113	2.00121	8.28006e-34			g45973	3.1274	1.17776e-127
	g43685	1.19948	6.39283e-50								g54461	1.72091	0			g40686	1.69747	1.02318e-149			g61078	1.99623	1.63962e-81			g29004	3.12723	2.66587e-100
	g47412	1.19754	1.66695e-34								g26162	1.72091	5.40282e-267			g54377	1.69262	0			g47099	1.99543	2.5874e-123			g21289	3.12476	3.1906e-110
	g61216	1.19738	5.52772e-96								g55788	1.72064	5.80808e-93			g20183	1.69148	1.58403e-74			g14722	1.99419	8.36468e-64			g34342	3.12284	8.32608e-94
	g4591	1.19666	3.62649e-79								g12275	1.71796	1.47435e-81			g43136	1.6911	1.35851e-192			g7168	1.9938	2.91521e-102			g10629	3.11848	1.2533e-63
	g31148	1.19561	2.41653e-73								g47082	1.7166	0			g10039	1.68952	0			g53978	1.99334	3.9877e-55			g61192	3.11291	8.39538e-150
	g19548	1.19478	4.28133e-46								g31111	1.71626	1.3591e-84			g25066	1.68403	4.82031e-109			g24627	1.98726	2.0349e-228			g24235	3.11198	4.19923e-27
	g18834	1.19398	2.65293e-28								g61488	1.71614	3.58119e-86			g43233	1.68126	1.85546e-200			g517	1.98583	7.43714e-171			g24347	3.11161	6.87515e-25
	g58786	1.19283	4.26893e-60								g24541	1.71603	0			g9848	1.68111	6.94038e-102			g14945	1.98437	5.9439e-80			g17066	3.10883	3.11876e-139
	g24713	1.19149	4.18632e-57								g54376	1.71564	3.1666e-211			g3524	1.67931	7.34847e-130			g43239	1.9842	7.38857e-194			g28022	3.10818	2.65943e-71
	g4287	1.19051	4.76671e-203								g35117	1.71534	5.82972e-127			g25710	1.6762	7.0918e-297			g14349	1.98321	6.82214e-65			g30083	3.10447	2.34593e-153
	g45799	1.18878	5.24705e-98								g60478	1.7125	5.67546e-101			g34127	1.67355	3.98504e-245			g20410	1.98292	9.79285e-87			g30162	3.10414	2.64234e-52
	g19572	1.18788	6.29872e-37								g14349	1.71011	3.6077e-130			g5192	1.67163	5.68788e-96			g521	1.98128	7.39327e-53			g738	3.10344	3.19141e-86
	g50610	1.1859	8.24041e-48								g28563	1.70734	2.02109e-121			g42843	1.66856	0			g60069	1.9767	8.87836e-66			g21531	3.10035	4.581e-127
	g26453	1.1854	1.2655e-46								g35826	1.69797	1.23412e-194			g3039	1.66357	2.515e-71			g61335	1.97263	4.07471e-86			g9001	3.09828	6.51172e-106
	g53780	1.18484	4.4879e-45								g20663	1.69558	1.35838e-222			g27212	1.66175	3.90961e-100			g43457	1.97168	1.06105e-188			g55949	3.09473	9.19013e-128
	g38710	1.18283	1.87203e-75								g30460	1.69546	1.29173e-114			g50746	1.65942	2.44892e-94			g60923	1.9715	7.48539e-83			g34727	3.08189	4.72642e-65
	g43148	1.18228	8.89523e-76								g43039	1.69484	5.35915e-110			g53898	1.65566	2.34311e-120			g30105	1.96492	1.13156e-118			g38022	3.0761	5.63578e-143
	g9416	1.18061	3.90019e-114								g47681	1.69356	2.31747e-148			g34431	1.65554	5.61482e-180			g60135	1.96028	6.61562e-132			g38944	3.0649	4.87354e-88
	g10452	1.18053	6.43058e-144								g58655	1.69237	6.49255e-238			g9358	1.65372	3.2987e-156			g42512	1.95316	1.46281e-110			g24435	3.05971	9.7844e-121
	g54240	1.17883	1.12368e-53								g7933	1.68995	0			g12503	1.65145	7.55766e-101			g47637	1.95223	5.66315e-115			g41949	3.05594	2.64828e-130
	g25459	1.17755	7.44318e-49								g58979	1.6859	0			g26026	1.65016	1.21409e-109			g34152	1.94907	4.3262e-72			g58895	3.05377	7.68236e-94
	g5155	1.17709	7.3162e-86								g12157	1.68413	2.30838e-78			g17401	1.64491	5.75982e-268			g20497	1.9391	1.40926e-75			g4904	3.05084	2.86868e-149
	g192	1.17679	4.29571e-50								g12852	1.684	3.61702e-193			g41105	1.64387	1.05917e-167			g54846	1.93317	1.8153e-93			g58905	3.05047	1.76104e-131
	g21290	1.17664	5.20848e-69								g13819	1.68261	6.57862e-181			g19281	1.6424	8.66975e-134			g31168	1.92711	2.81932e-57			g59911	3.0434	8.51916e-62
	g34782	1.17556	4.14377e-63								g54335	1.6788	5.69266e-299			g54978	1.63989	6.6075e-157			g26783	1.92666	2.89791e-91			g61693	3.04228	7.09415e-85
	g57784	1.17107	5.59543e-58								g48720	1.67773	3.3299e-93			g45600	1.63028	6.03695e-151			g62134	1.9171	3.99698e-53			g43045	3.04036	4.81754e-63
	g47081	1.17072	1.15519e-97								g63861	1.67727	3.69466e-88			g60230	1.62664	3.65362e-225			g55238	1.91331	1.50899e-104			g54461	3.03567	1.80733e-138
	g10238	1.16965	1.61686e-110								g26627	1.6762	5.41881e-139			g51141	1.62313	1.81394e-112			g30535	1.91021	2.70534e-145			g325	3.03231	5.03899e-102
	g4477	1.16838	5.2196e-103								g4904	1.67557	9.89009e-148			g59	1.62089	2.67009e-192			g59562	1.90933	5.38743e-111			g5212	3.02655	1.56089e-88
	g4398	1.16836	2.94583e-80								g30337	1.67507	9.34869e-79			g9065	1.61504	1.67747e-163			g5088	1.90736	2.65895e-143			g23166	3.02549	2.17824e-133
	g26139	1.16639	3.67751e-37								g20442	1.67293	4.81719e-279			g307	1.61091	1.0984e-145			g42093	1.90724	7.29653e-154			g3876	3.0218	3.19025e-168
	g39285	1.16617	2.29581e-131								g30083	1.66544	4.90586e-132			g30960	1.60506	1.64889e-157			g13163	1.9061	6.12915e-111			g56897	3.02064	1.56433e-91
	g17415	1.16567	9.04116e-57								g34481	1.66466	3.39229e-203			g54133	1.6039	2.07444e-97			g54133	1.90586	1.71178e-56			g52532	3.01924	4.68299e-144
	g13128	1.16555	1.10163e-104								g31329	1.66414	7.44969e-72			g60069	1.60256	4.94088e-107			g9290	1.90566	1.40343e-174			g41806	3.01324	1.17769e-111
	g61055	1.16374	1.02257e-111								g31117	1.66194	4.06476e-68			g379	1.60167	2.66273e-167			g40271	1.90424	9.30951e-58			g39300	3.01305	2.23041e-85
	g28261	1.16353	2.49983e-187								g17046	1.66161	1.44112e-79			g29755	1.59871	9.85075e-232			g31343	1.90363	2.90346e-60			g29557	3.01201	5.54926e-133
	g39208	1.16316	4.75913e-210								g60258	1.65541	7.89294e-227			g41897	1.5968	6.35937e-93			g3926	1.90345	1.90322e-55			g42632	3.00376	2.02308e-187
	g43361	1.16251	6.09073e-35								g8286	1.65452	2.16332e-78			g4812	1.59515	2.65642e-137			g35208	1.90326	7.66437e-183			g46494	3.00068	4.79646e-137
	g17456	1.1624	1.38351e-212								g7924	1.65255	3.35067e-208			g55238	1.59363	3.7988e-169			g58752	1.9004	9.83888e-200			g58960	2.99717	3.40341e-179
	g1106	1.16127	2.06524e-88								g8747	1.65203	9.09261e-144			g14800	1.59349	3.24916e-62			g60161	1.89942	4.50381e-152			g34804	2.99281	5.01283e-85
	g34775	1.16051	1.3824e-48								g8969	1.65175	0			g10997	1.59347	6.55483e-211			g9776	1.89922	1.64271e-133			g17267	2.98707	1.67378e-111
	g4551	1.15953	6.96393e-87								g42542	1.64989	4.43207e-186			g35438	1.5911	1.49018e-129			g7510	1.89916	1.30329e-48			g34275	2.98489	1.43149e-133
	g5403	1.15934	1.04257e-108								g43972	1.64909	3.23617e-132			g21425	1.58901	1.01699e-59			g43233	1.89722	1.87083e-111			g25730	2.97908	5.68115e-56
	g44968	1.15819	2.23129e-95								g2628	1.64883	3.58987e-128			g61557	1.5886	5.27189e-147			g30510	1.89616	3.60023e-207			g30766	2.97653	8.84502e-69
	g63735	1.15239	1.55987e-150								g53723	1.64351	0			g12190	1.58819	2.52539e-201			g22828	1.89548	0			g8219	2.97343	2.28634e-57
	g50517	1.15171	3.54274e-46								g20337	1.6418	6.62923e-167			g11708	1.58488	4.19878e-107			g30454	1.89283	1.07978e-71			g60462	2.97246	8.32565e-120
	g55677	1.15159	5.99471e-93								g20025	1.64097	8.6315e-169			g40777	1.58424	1.29167e-152			g58791	1.88519	3.08928e-34			g49880	2.97156	1.87077e-144
	g35337	1.15127	1.18244e-45								g30960	1.63937	7.837e-151			g15319	1.58175	3.79156e-153			g19697	1.87792	8.15209e-64			g25970	2.9612	2.13535e-55
	g54432	1.1507	1.82915e-102								g55297	1.63909	2.22976e-278			g11751	1.58141	3.42722e-89			g53496	1.87511	3.07446e-69			g24049	2.96055	4.34642e-129
	g42315	1.15069	8.62866e-128								g5146	1.63866	1.29443e-158			g46451	1.5808	1.0188e-56			g30836	1.87495	4.25111e-46			g33892	2.9598	1.92599e-134
	g39175	1.15064	1.04824e-62								g24871	1.63686	1.36542e-216			g195	1.58066	5.25235e-104			g53642	1.87305	4.75623e-65			g9331	2.95926	2.92114e-126
	g463	1.14817	3.41997e-79								g30833	1.6351	1.68517e-117			g18954	1.58007	1.81744e-230			g38246	1.87298	8.07052e-74			g54078	2.95786	2.81113e-88
	g54780	1.1479	2.20069e-85								g31091	1.63441	4.10899e-76			g21444	1.5796	4.34675e-122			g20448	1.8696	1.31057e-169			g34401	2.95756	5.2315e-118
	g765	1.1477	7.63015e-68								g9996	1.63301	1.4932e-113			g30510	1.57696	0			g26685	1.86863	1.88593e-147			g54220	2.95581	3.35211e-195
	g35290	1.14674	2.79154e-138								g35310	1.63078	2.10474e-130			g22249	1.5767	1.17899e-160			g30848	1.8613	4.60423e-75			g48462	2.95138	2.52999e-78
	g31545	1.14514	9.3639e-53								g37076	1.63001	3.34459e-100			g29963	1.57146	1.42507e-213			g1474	1.85962	6.31911e-74			g54820	2.94836	5.62558e-116
	g54876	1.14374	2.32766e-229								g37207	1.62998	1.42223e-265			g651	1.56327	1.56474e-83			g8747	1.85889	9.72252e-78			g39589	2.94629	6.80626e-77
	g32564	1.14197	2.04695e-67								g25925	1.6295	4.50537e-219			g43172	1.56221	1.36879e-76			g20377	1.85449	4.02742e-79			g56005	2.94383	1.49365e-185
	g55040	1.14092	1.64695e-244								g60848	1.62941	6.41987e-132			g42420	1.5601	2.98332e-82			g13247	1.85022	1.53532e-41			g59543	2.94327	1.08324e-68
	g38350	1.13918	1.34963e-160								g4784	1.62882	1.79043e-218			g629	1.5582	7.29195e-91			g37207	1.84816	3.23734e-163			g31518	2.93715	3.36586e-100
	g51122	1.13837	1.39046e-91								g34802	1.62867	2.19802e-233			g22508	1.55804	1.28996e-193			g54334	1.84766	1.5656e-52			g54834	2.93212	1.76924e-93
	g8787	1.13817	1.99972e-74								g34243	1.62665	7.9287e-180			g10924	1.55793	8.13662e-127			g38199	1.84736	2.3433e-70			g362	2.92723	3.05734e-106
	g42751	1.13693	4.67232e-62								g48365	1.62547	1.96045e-157			g43234	1.55762	1.29061e-185			g34175	1.84636	3.15511e-92			g49909	2.92496	6.37891e-66
	g2187	1.13672	2.00194e-41								g22828	1.62288	0			g46829	1.55266	8.90476e-256			g51374	1.8437	1.66581e-123			g38013	2.92219	3.67383e-129
	g59568	1.13509	7.36952e-120								g20052	1.62138	4.44246e-115			g33881	1.55193	1.85357e-87			g60523	1.84301	1.29152e-47			g25907	2.92149	1.55445e-91
	g20519	1.1347	6.54573e-104								g47212	1.61754	7.36152e-87			g60767	1.55174	4.43678e-121			g379	1.8406	3.69324e-97			g9732	2.92044	1.83225e-54
	g23987	1.13168	8.38546e-109								g58234	1.61746	3.5217e-240			g25354	1.54959	2.73827e-178			g29514	1.84	7.82718e-46			g29786	2.90845	1.85086e-73
	g41750	1.13151	1.56324e-111								g17457	1.61691	3.67523e-163			g26717	1.54544	7.24024e-110			g60443	1.83753	7.96773e-43			g34010	2.9048	3.19167e-75
	g49936	1.13036	5.9615e-205								g629	1.61203	3.88001e-78			g54846	1.54215	6.46647e-134			g5655	1.83168	7.85352e-79			g8479	2.90254	2.62151e-64
	g56192	1.12992	7.77145e-34								g55289	1.60923	7.63694e-84			g47842	1.53831	1.50086e-96			g31704	1.82667	1.70257e-164			g31126	2.90128	1.92394e-103
	g55222	1.12609	2.68707e-76								g46272	1.60626	1.07522e-171			g58302	1.5367	3.28043e-62			g20337	1.8264	1.00335e-90			g60033	2.895	7.91671e-62
	g36554	1.12585	5.54761e-134								g58708	1.6045	3.8621e-100			g40834	1.5367	6.05006e-213			g7736	1.82505	2.67899e-63			g54039	2.89057	8.35101e-85
	g42961	1.124	6.26374e-65								g517	1.60437	1.96568e-238			g34030	1.53612	1.23714e-142			g43172	1.82148	6.34959e-41			g50769	2.88873	1.33309e-93
	g34710	1.12203	9.85357e-60								g60184	1.60185	8.84113e-181			g43457	1.53406	3.20326e-236			g58765	1.81988	9.47645e-74			g13331	2.88592	4.85881e-80
	g31051	1.12136	1.18958e-35								g59483	1.59891	1.50928e-240			g61120	1.53363	1.35206e-212			g42946	1.81761	4.41572e-51			g46330	2.87789	1.43366e-142
	g11681	1.11809	4.252e-140								g10666	1.59644	1.0597e-167			g4553	1.53281	1.03599e-67			g59700	1.81325	1.49137e-51			g4427	2.8721	9.76301e-108
	g38960	1.1161	2.93221e-50								g54657	1.59272	1.05265e-282			g53277	1.52544	1.69816e-73			g30487	1.80918	1.75163e-179			g59519	2.86637	1.18609e-102
	g23740	1.11592	4.60219e-65								g60458	1.59207	2.57195e-209			g13548	1.52395	3.67313e-165			g161	1.8086	7.61079e-35			g54118	2.86586	2.62591e-65
	g54109	1.1148	1.7236e-169								g41644	1.58877	2.6546e-69			g63132	1.52307	1.53646e-83			g34400	1.80844	1.20163e-94			g35181	2.86568	1.33599e-73
	g38835	1.11385	2.8492e-73								g22390	1.58684	4.18819e-96			g25441	1.52257	2.59488e-89			g5389	1.80376	8.05716e-42			g12852	2.86212	5.33305e-97
	g14620	1.11314	9.13081e-32								g64112	1.58528	7.92619e-66			g29023	1.51998	3.4566e-234			g40134	1.80132	7.91935e-41			g58380	2.85488	1.05504e-85
	g193	1.11201	3.69731e-55								g29152	1.58394	0			g37926	1.51437	4.5957e-101			g63132	1.80095	7.38877e-57			g58778	2.85124	1.43728e-111
	g1477	1.11151	1.34518e-86								g20733	1.58381	1.14178e-70			g334	1.51293	3.19049e-95			g61075	1.79929	1.17904e-59			g41713	2.85029	7.23659e-87
	g57028	1.11144	6.5716e-61								g155	1.58366	6.42512e-157			g30360	1.51241	7.06065e-73			g24300	1.79835	2.52043e-62			g4640	2.83699	7.09851e-51
	g20467	1.11057	6.87509e-133								g26912	1.58348	1.6112e-97			g12008	1.51126	1.00182e-54			g4973	1.79522	1.53113e-118			g54966	2.82832	1.79883e-54
	g2433	1.11033	6.32507e-120								g35003	1.58246	2.23564e-166			g20410	1.50994	1.3125e-129			g17056	1.79433	6.99098e-52			g54952	2.825	3.30662e-53
	g54990	1.10824	5.98707e-97								g29049	1.58197	1.4288e-215			g59488	1.50808	9.85359e-66			g195	1.79402	1.46207e-64			g4737	2.81721	6.16954e-110
	g31384	1.10534	6.22401e-108								g16054	1.58028	1.41034e-90			g60929	1.50772	1.93962e-116			g30596	1.79261	1.01636e-60			g57562	2.8111	8.12434e-50
	g308	1.10359	1.55138e-36								g26424	1.58018	1.36869e-186			g21652	1.50733	1.05505e-110			g35612	1.78502	1.30742e-63			g5189	2.81063	6.31399e-67
	g34430	1.10226	9.17549e-89								g36141	1.57949	2.1034e-86			g34510	1.50484	5.30262e-77			g60440	1.78346	6.5604e-81			g34583	2.80906	1.9845e-57
	g25157	1.10195	6.0375e-198								g195	1.57818	3.03382e-102			g51186	1.50456	1.32801e-102			g9936	1.78307	8.85743e-133			g33878	2.80894	3.21796e-73
	g40236	1.10064	7.62551e-43								g379	1.57815	6.01175e-145			g14349	1.50375	1.80896e-72			g21485	1.78143	2.90743e-135			g39392	2.80474	4.65871e-55
	g50296	1.10054	2.21371e-83								g827	1.57646	1.48463e-205			g637	1.50355	1.21257e-57			g637	1.76723	2.32794e-39			g11724	2.80169	2.63671e-81
	g21704	1.10052	1.49774e-112								g63923	1.57498	4.05879e-231			g15222	1.50313	1.8144e-140			g60478	1.76611	1.44153e-53			g30848	2.79089	3.28702e-97
	g35227	1.10016	4.57774e-69								g54659	1.57462	0			g8286	1.50214	8.10383e-62			g1466	1.76573	3.70955e-92			g26031	2.79041	6.33879e-75
	g42978	1.09998	3.67537e-71								g30977	1.57441	2.64042e-103			g34015	1.50182	9.74712e-114			g19658	1.76476	2.57298e-108			g53606	2.78997	8.22612e-83
	g38300	1.0997	3.43073e-95								g25300	1.57375	6.1599e-113			g373	1.50163	3.52463e-142			g10102	1.76209	6.05785e-142			g20747	2.78949	1.3341e-76
	g860	1.09921	4.32682e-71								g58896	1.57219	4.12456e-96			g40877	1.50111	0			g46400	1.76163	6.4868e-33			g34303	2.78842	9.7181e-135
	g23055	1.09856	1.44477e-93								g31638	1.57176	6.50461e-157			g29743	1.50024	1.34067e-201			g307	1.76103	1.90159e-68			g6383	2.78475	1.7531e-73
	g50608	1.09812	5.01087e-173								g31079	1.57082	1.86865e-117			g19658	1.49849	3.80837e-155			g46241	1.75639	1.2494e-62			g5098	2.77847	4.06836e-127
	g4294	1.09681	2.0401e-146								g30202	1.56956	2.35075e-68			g25256	1.49813	3.96885e-203			g47391	1.7505	4.88627e-46			g10012	2.77808	2.23812e-57
	g9529	1.09671	2.01234e-63								g40883	1.56761	1.26989e-194			g55304	1.49795	2.672e-177			g63869	1.75023	1.15106e-55			g8988	2.77268	4.66648e-80
	g54751	1.09629	2.0458e-72								g11499	1.56639	4.93793e-108			g38594	1.4958	1.27159e-145			g43724	1.75004	1.81877e-88			g46038	2.7722	1.68708e-66
	g53515	1.09604	3.30556e-37								g57924	1.56516	2.72477e-94			g47212	1.49501	1.52005e-66			g42542	1.74826	6.93058e-99			g46387	2.77172	1.07973e-119
	g58521	1.09602	1.03721e-235								g184	1.56312	0			g12045	1.49388	4.66235e-110			g40106	1.7478	1.35515e-48			g1282	2.76737	6.36658e-34
	g42729	1.09587	6.377e-76								g40271	1.56243	6.14759e-74			g42862	1.49321	6.31956e-62			g48720	1.74746	6.36548e-43			g25083	2.76494	7.65631e-98
	g32116	1.09552	1.70978e-55								g50814	1.56124	6.43403e-129			g23265	1.49131	5.24335e-95			g40686	1.7465	6.45722e-77			g13268	2.76236	2.29942e-109
	g30695	1.09386	6.44289e-125								g25933	1.56051	2.0213e-259			g38682	1.48385	6.70065e-180			g32516	1.74157	1.23839e-45			g58594	2.76104	1.57282e-58
	g30585	1.09179	2.00872e-60								g41861	1.55899	1.88065e-84			g34400	1.48321	2.80332e-138			g59096	1.74017	2.40407e-87			g34781	2.75997	2.62143e-141
	g46634	1.09136	1.41021e-30								g6081	1.55814	1.89363e-164			g24627	1.48088	2.13926e-272			g5098	1.73939	1.19326e-228			g5480	2.74813	7.75102e-78
	g53015	1.08789	2.87903e-84								g62179	1.55702	2.70983e-75			g4449	1.4791	0			g12855	1.7387	9.68123e-57			g34183	2.746	5.32745e-124
	g23939	1.08656	1.36508e-117								g30519	1.55684	3.83096e-111			g20577	1.47804	0			g1007	1.73571	1.51535e-66			g41989	2.74052	9.62929e-60
	g17223	1.08613	1.27849e-82								g60535	1.55661	4.20857e-72			g46567	1.47203	6.53906e-94			g30122	1.73245	1.60175e-120			g41815	2.73971	3.2348e-92
	g34954	1.08583	4.17461e-36								g59661	1.55527	1.42421e-65			g42468	1.47194	2.88633e-134			g55227	1.73105	8.74338e-150			g23395	2.73571	6.11527e-96
	g27905	1.08529	1.01509e-47								g25622	1.5546	1.98433e-181			g30122	1.47109	1.16503e-205			g33592	1.73098	4.52963e-104			g58882	2.73404	7.1562e-67
	g30015	1.0851	2.52998e-68								g2267	1.55335	4.33122e-265			g59024	1.46827	7.34962e-57			g50746	1.72986	1.0915e-58			g42080	2.73242	6.98021e-119
	g8698	1.08459	1.13807e-49								g34703	1.55164	1.65812e-127			g60270	1.46777	5.44609e-205			g37622	1.7274	4.31731e-86			g20052	2.72797	7.0226e-62
	g10197	1.08382	8.68961e-51								g1007	1.55064	2.07048e-110			g59846	1.46754	5.73095e-163			g29555	1.72722	2.18156e-66			g13410	2.72317	1.72505e-79
	g34711	1.08358	6.72582e-42								g31610	1.55025	2.81352e-233			g25320	1.46357	3.22756e-96			g19964	1.72518	3.91909e-48			g53702	2.72054	2.06643e-99
	g12517	1.08172	2.58177e-52								g9456	1.54968	4.04143e-143			g645	1.46317	7.906e-55			g9342	1.72455	1.30149e-189			g25719	2.71972	1.57451e-50
	g44940	1.08017	1.93227e-82								g63942	1.54921	5.17032e-123			g45278	1.4622	1.61589e-98			g2628	1.724	3.01991e-66			g59399	2.71944	2.73473e-137
	g9360	1.07968	8.4163e-94								g60377	1.54734	4.52448e-65			g29401	1.46095	9.1254e-92			g42771	1.72378	3.60937e-219			g5261	2.71928	1.24161e-119
	g9445	1.07745	4.11849e-145								g55028	1.54675	2.69275e-185			g29833	1.45341	0			g59389	1.72359	1.96152e-44			g4960	2.71636	7.76136e-44
	g29906	1.07263	1.23809e-209								g14106	1.54554	5.13787e-112			g61075	1.45276	8.27359e-114			g20630	1.72233	1.78321e-46			g30318	2.71397	1.52902e-45
	g3883	1.07196	6.60407e-35								g12571	1.54546	1.20537e-118			g8747	1.45146	1.61655e-107			g41644	1.71841	9.21669e-32			g42585	2.71285	5.11025e-110
	g13073	1.07091	1.51823e-58								g61211	1.54475	5.38953e-210			g60587	1.45107	1.11273e-125			g15915	1.71567	2.51749e-65			g30006	2.71231	3.94929e-54
	g20617	1.07017	6.11047e-49								g61319	1.54327	7.53614e-177			g11909	1.447	8.24274e-189			g17583	1.71548	7.0744e-39			g24528	2.71027	1.40081e-76
	g60494	1.06993	9.03539e-28								g22416	1.54282	0			g2049	1.4469	1.12433e-74			g25316	1.71436	1.11513e-87			g47879	2.70325	4.34007e-86
	g31264	1.06956	2.39951e-39								g42380	1.5408	1.4793e-164			g23238	1.44639	1.66902e-260			g42079	1.71325	4.87801e-111			g48148	2.70286	1.18244e-49
	g1436	1.06761	4.17754e-68								g60366	1.53965	7.84762e-57			g25316	1.44523	3.12028e-142			g25320	1.71274	1.04537e-62			g23920	2.69845	4.85938e-90
	g10264	1.06686	7.33973e-74								g10078	1.53705	0			g41950	1.44287	1.21578e-90			g439	1.7105	1.16739e-41			g62331	2.68594	1.60156e-114
	g54315	1.06255	1.26128e-60								g7425	1.53571	1.18302e-252			g12705	1.44276	5.63477e-122			g30493	1.70891	6.03763e-147			g58139	2.68261	4.23103e-116
	g5577	1.06093	9.71941e-81								g59662	1.53472	7.22036e-244			g34422	1.44274	6.76712e-74			g13242	1.70756	1.35475e-34			g30768	2.6826	7.40002e-79
	g13081	1.05949	2.2348e-195								g59048	1.53191	1.11307e-126			g30513	1.44255	8.84163e-67			g53898	1.70643	5.61892e-52			g62479	2.68233	2.11621e-122
	g42725	1.05947	1.3434e-109								g25528	1.53155	7.92319e-130			g31343	1.4396	5.88446e-92			g30333	1.70632	3.04133e-144			g61034	2.68137	2.64899e-69
	g9641	1.05622	3.06837e-86								g35291	1.53127	6.19069e-58			g9342	1.43767	2.99749e-276			g59544	1.70501	1.15892e-37			g7940	2.6753	4.73544e-46
	g11668	1.05437	1.03189e-105								g47404	1.53106	2.22374e-83			g4717	1.43566	1.47994e-74			g50612	1.70113	1.88174e-82			g11502	2.67314	1.34692e-61
	g17201	1.0542	3.02877e-63								g30510	1.53038	7.70385e-297			g19697	1.43462	1.1141e-76			g54454	1.70107	2.58518e-74			g29608	2.66966	1.06367e-104
	g5457	1.05371	3.28703e-103								g13159	1.52979	0			g517	1.43346	1.00758e-210			g20355	1.69763	9.61055e-137			g42035	2.66931	3.95985e-104
	g47107	1.04831	4.88381e-59								g43724	1.52413	1.42775e-154			g25662	1.43326	2.65179e-162			g27212	1.695	6.24443e-42			g60914	2.66883	2.02473e-127
	g1387	1.04571	1.81209e-45								g43900	1.5224	9.85031e-221			g55307	1.43227	8.07412e-49			g47172	1.69474	1.49556e-99			g4047	2.66294	3.49721e-72
	g41863	1.04552	1.32994e-36								g59809	1.52223	4.68026e-110			g63816	1.42847	9.48558e-286			g16865	1.68796	1.3489e-81			g34157	2.66196	1.6742e-48
	g30317	1.0421	8.9679e-65								g26717	1.52186	1.34663e-94			g43724	1.42774	9.00712e-116			g47212	1.68703	1.89698e-41			g31324	2.66142	4.13761e-64
	g20278	1.04041	1.05875e-196								g59839	1.5213	9.66753e-154			g1007	1.42515	1.18709e-104			g54784	1.68439	2.23454e-109			g46396	2.65649	2.53641e-52
	g12892	1.03967	1.0704e-147								g59622	1.52116	6.19317e-227			g37181	1.42235	1.83428e-143			g60929	1.68434	1.52674e-77			g20333	2.65322	2.29054e-54
	g5114	1.03906	2.80613e-143								g35612	1.52042	2.58985e-107			g59065	1.42159	2.87533e-55			g34431	1.68319	2.9584e-81			g43658	2.64878	5.28745e-126
	g13123	1.03877	1.23254e-71								g9463	1.51948	5.63171e-83			g17016	1.41862	2.26698e-116			g29841	1.67787	3.28309e-139			g60689	2.64766	2.82108e-116
	g63563	1.03665	1.89963e-41								g13464	1.51836	6.01034e-142			g24975	1.41796	1.87859e-67			g63942	1.67418	4.93123e-78			g13640	2.64698	3.75427e-72
	g19029	1.03479	1.32251e-32								g9268	1.51816	4.90771e-74			g62058	1.41169	5.95134e-46			g61557	1.6734	1.22796e-69			g42836	2.64697	2.59878e-127
	g30838	1.03441	9.39679e-39								g58189	1.51718	1.12671e-255			g13270	1.4114	1.76939e-71			g34510	1.67257	2.24737e-50			g24090	2.6469	9.06233e-97
	g37883	1.03441	4.78538e-40								g60929	1.5163	3.20624e-110			g7168	1.41074	3.97809e-108			g12157	1.6713	8.47905e-40			g47154	2.64605	6.58649e-77
	g50548	1.03258	6.782e-109								g46355	1.51623	1.78121e-226			g35200	1.40874	1.10932e-82			g47404	1.66749	1.36152e-46			g30184	2.64235	2.84468e-77
	g34407	1.03184	1.69748e-143								g1235	1.51621	3.76715e-167			g23491	1.40645	1.81634e-62			g5036	1.66635	3.4221e-38			g29559	2.64086	3.09761e-116
	g49934	1.03023	1.54784e-36								g19636	1.51462	4.06642e-291			g51374	1.40517	3.70751e-178			g26026	1.66261	5.00818e-40			g1191	2.6408	2.20889e-48
	g14843	1.02868	1.90806e-52								g41820	1.51424	2.68595e-84			g57960	1.40489	6.17628e-299			g24360	1.66086	9.90451e-65			g42015	2.63967	5.39288e-81
	g1276	1.02685	2.42908e-93								g17364	1.51259	4.85744e-179			g26126	1.40414	1.17554e-103			g9358	1.65513	1.42239e-61			g21431	2.63957	1.63534e-62
	g835	1.02591	1.35229e-41								g54844	1.51176	2.36005e-77			g42542	1.40282	1.07656e-107			g45962	1.6532	4.26416e-35			g38656	2.63945	3.97775e-140
	g54822	1.02575	1.12985e-32								g651	1.51172	7.43756e-87			g60478	1.40201	2.51706e-83			g37633	1.65302	1.35782e-127			g16664	2.63742	1.18775e-67
	g59521	1.02565	4.37849e-93								g9342	1.5117	0			g4813	1.4013	8.56464e-66			g26162	1.65205	9.65046e-112			g39164	2.6346	1.74697e-105
	g55111	1.02245	2.99674e-32								g59849	1.50961	9.22678e-86			g55099	1.40122	1.55774e-84			g54450	1.64917	1.85577e-50			g1171	2.63398	5.15106e-82
	g29616	1.02074	1.42425e-129								g10283	1.50857	1.98754e-93			g37207	1.40069	1.4333e-216			g54325	1.64696	1.29535e-75			g1110	2.63281	3.0684e-67
	g43297	1.02013	4.97067e-121								g49054	1.50739	5.78118e-83			g17171	1.3937	1.93959e-60			g41897	1.64509	7.0002e-38			g1236	2.63192	1.00675e-49
	g16715	1.01924	2.9312e-190								g549	1.50633	3.87971e-263			g41644	1.39327	1.10133e-36			g60767	1.64501	2.45141e-55			g25615	2.62923	1.07396e-55
	g64116	1.01897	4.36067e-65								g30139	1.50596	4.78777e-105			g24360	1.39313	1.28542e-106			g21444	1.64499	1.55951e-59			g53898	2.62647	4.81553e-91
	g54081	1.01892	6.97233e-71								g49362	1.50505	5.81587e-133			g58768	1.39277	1.37716e-108			g51025	1.64449	2.30776e-184			g38876	2.62278	1.13142e-122
	g42823	1.01836	8.59795e-132								g30966	1.50427	1.50277e-95			g20578	1.3878	2.03892e-247			g30960	1.64185	2.17041e-78			g54769	2.61644	4.39373e-109
	g43451	1.01461	2.34727e-34								g2378	1.50355	3.18695e-90			g8434	1.38751	0			g10039	1.64074	6.91771e-237			g485	2.61492	6.70394e-68
	g12819	1.01284	3.12409e-127								g12152	1.50193	0			g42817	1.38589	1.08377e-100			g3039	1.63971	3.22238e-25			g34480	2.61469	9.98875e-47
	g8743	1.01137	6.24153e-63								g59152	1.50136	3.22685e-56			g30151	1.38487	4.07371e-62			g14100	1.63934	1.84049e-119			g40271	2.61261	6.94236e-79
	g6158	1.00883	2.58772e-101								g5139	1.50134	2.95757e-74			g54278	1.38001	2.12444e-42			g26717	1.63852	1.45299e-52			g29129	2.6087	6.37466e-60
	g14521	1.0087	1.40358e-49								g24611	1.50014	1.59128e-179			g5098	1.37907	0			g63923	1.6347	3.63989e-119			g54206	2.59978	6.77828e-65
	g19709	1.00831	5.5719e-118								g60221	1.4999	4.43375e-227			g16514	1.37723	8.88701e-103			g59996	1.63423	5.89215e-34			g36781	2.59483	2.36238e-44
	g22877	1.00673	5.93637e-41								g34420	1.49987	1.5614e-241			g56032	1.3771	1.54906e-50			g34802	1.63268	1.39008e-108			g26432	2.59125	5.74907e-85
	g30123	1.00632	4.16473e-97								g62479	1.49858	5.16959e-130			g43210	1.37496	2.61549e-148			g59148	1.63169	1.06571e-47			g4399	2.58706	4.76238e-65
	g11335	1.00628	1.81569e-94								g16972	1.49805	2.57435e-83			g31291	1.37448	5.57001e-51			g6082	1.62986	9.64393e-39			g59990	2.58297	1.80362e-85
	g13408	1.00598	3.93862e-126								g59514	1.49781	1.76068e-124			g45955	1.3731	4.56814e-58			g17457	1.62954	6.20038e-78			g34171	2.58098	1.92125e-50
	g357	1.00525	1.02371e-90								g3854	1.49533	1.10167e-105			g59813	1.37256	1.42973e-111			g18954	1.62818	3.89698e-132			g15963	2.58084	9.10643e-43
	g61217	1.00253	7.96706e-37								g59369	1.49457	0			g1129	1.3694	3.6181e-71			g7924	1.62637	7.76282e-104			g49718	2.57876	5.02708e-42
	g47774	1.00174	1.55681e-46								g50746	1.49418	5.6934e-92			g52539	1.36811	2.11405e-176			g20371	1.62288	3.34374e-53			g3524	2.5741	2.95365e-77
	g31856	1.0016	9.69274e-78								g4732	1.49287	0			g35612	1.36796	3.96327e-92			g10078	1.6188	2.88506e-154			g45962	2.57406	4.03174e-89
	g1095	-1.00857	6.52334e-50								g53898	1.49239	3.62836e-93			g13668	1.36583	5.56899e-60			g11677	1.61808	7.54191e-87			g34108	2.57191	2.22843e-45
	g13482	-1.01198	8.84079e-28								g60456	1.49069	2.10715e-64			g56530	1.36539	4.29852e-74			g30513	1.61528	4.63688e-38			g31107	2.57071	1.36733e-51
	g55311	-1.0138	2.68987e-40								g24869	1.49016	1.79324e-122			g16865	1.3643	2.40996e-123			g34062	1.61085	3.84774e-48			g14285	2.56689	1.60679e-88
	g49986	-1.01383	6.11704e-22								g55301	1.49014	1.01349e-128			g35285	1.36426	1.50437e-56			g17371	1.60998	1.68356e-43			g4172	2.56411	3.08259e-73
	g17155	-1.02286	6.86742e-15								g53962	1.4898	1.83163e-133			g13494	1.36277	5.43991e-122			g13368	1.60878	8.75106e-57			g5263	2.56159	9.8854e-54
	g51980	-1.02477	9.40241e-14								g19671	1.48539	2.43526e-105			g34932	1.36127	3.39808e-64			g9851	1.60838	3.04256e-33			g55556	2.55882	6.85429e-47
	g60053	-1.04135	1.61922e-22								g4441	1.48289	6.41178e-138			g55227	1.36104	1.02339e-192			g55297	1.60387	1.33505e-119			g12193	2.55625	6.10433e-95
	g38705	-1.04173	6.66431e-21								g54419	1.48183	0			g25543	1.36071	1.99429e-79			g42380	1.60313	1.51975e-88			g21451	2.55285	1.66173e-66
	g28924	-1.0418	2.52397e-33								g28562	1.48172	2.17563e-118			g38282	1.35936	8.01951e-46			g14106	1.60276	3.73546e-52			g13247	2.55012	4.27621e-108
	g10331	-1.04237	0.198713								g43232	1.48124	2.46348e-158			g27233	1.35894	5.71235e-55			g38682	1.60261	1.02213e-93			g54281	2.54829	3.03858e-71
	g38190	-1.04269	8.11704e-20								g13276	1.477	4.65801e-73			g24659	1.35858	2.93262e-51			g54769	1.59855	1.5456e-151			g10295	2.54675	8.87445e-57
	g9636	-1.04517	1.0424e-27								g62331	1.47663	6.55953e-226			g42829	1.35836	8.30149e-87			g59458	1.5984	2.07217e-45			g60809	2.54447	5.64424e-54
	g59813	-1.04555	6.73257e-22								g21709	1.47654	5.22041e-182			g55154	1.354	1.37615e-64			g4486	1.59807	6.72267e-172			g36141	2.53711	1.27593e-49
	g39341	-1.04753	9.7506e-14								g26089	1.47597	2.58363e-97			g4430	1.3533	4.80358e-61			g51186	1.59643	1.89236e-41			g37076	2.53692	7.89627e-96
	g13531	-1.05088	4.29137e-17								g33843	1.47376	0			g17980	1.35205	3.30039e-109			g20436	1.59417	1.93155e-96			g46372	2.53652	1.46848e-73
	g13120	-1.05215	3.04359e-23								g13337	1.47236	4.36407e-240			g53292	1.35051	5.06683e-105			g61336	1.59097	1.50999e-84			g46268	2.5344	7.61597e-45
	g217	-1.05249	9.66996e-34								g56860	1.47153	3.76298e-60			g50356	1.34889	4.09693e-69			g54978	1.58641	9.3629e-73			g18227	2.53244	1.1532e-94
	g13570	-1.05787	1.00962e-64								g13908	1.46794	4.07673e-110			g35468	1.34747	1.88992e-246			g55028	1.58381	2.74069e-82			g54060	2.53227	1.24867e-81
	g59388	-1.05805	3.57832e-17								g38381	1.46788	1.50437e-60			g39022	1.34709	9.52198e-178			g50222	1.58274	2.24426e-89			g34243	2.53033	6.95635e-111
	g29978	-1.05913	9.23514e-18								g2631	1.46718	2.12542e-50			g39341	1.34611	1.2477e-61			g20442	1.58253	2.41065e-110			g56453	2.53012	1.00807e-66
	g6521	-1.06235	2.05086e-20								g25579	1.46565	7.94055e-70			g20738	1.34373	1.22335e-76			g34422	1.58182	4.3904e-32			g42852	2.51695	1.55103e-71
	g26941	-1.0629	2.74784e-16								g63249	1.46371	3.96066e-109			g43384	1.34083	1.2856e-94			g43234	1.57959	3.43953e-93			g42526	2.51566	2.03326e-96
	g41795	-1.0638	1.52655e-16								g12524	1.46203	1.46041e-300			g24431	1.34006	5.3584e-67			g35324	1.57867	3.87715e-75			g39320	2.5155	2.95381e-91
	g48288	-1.06574	5.86414e-14								g27227	1.46152	4.0721e-158			g41817	1.33871	8.90055e-87			g47203	1.57779	1.93431e-104			g50287	2.51456	3.18099e-60
	g3685	-1.07206	3.30178e-40								g24319	1.4603	4.24509e-82			g439	1.33119	3.40866e-60			g51198	1.57625	8.46288e-53			g50806	2.5139	7.60114e-20
	g59494	-1.07301	4.69152e-26								g46703	1.45976	3.91944e-110			g55851	1.33032	5.82089e-57			g58165	1.5751	1.51451e-140			g21456	2.51369	1.59573e-83
	g9423	-1.07966	6.06788e-14								g60521	1.45473	5.16845e-279			g43097	1.33004	1.21545e-44			g29332	1.57146	2.52531e-38			g4508	2.51211	7.02855e-68
	g29860	-1.08014	2.62228e-97								g30493	1.45264	1.99072e-221			g6082	1.32879	6.25604e-57			g12503	1.57125	8.41649e-37			g16931	2.51128	6.23962e-90
	g43899	-1.08018	3.47768e-22								g60029	1.45238	2.63691e-133			g59839	1.32875	3.84353e-120			g17401	1.57121	4.78563e-131			g25402	2.50961	6.42514e-86
	g55099	-1.08123	5.16669e-14								g1065	1.45161	3.05165e-209			g42078	1.32827	4.17817e-55			g58779	1.56943	1.82336e-94			g3278	2.50766	2.17966e-71
	g60436	-1.08177	9.49458e-76								g31343	1.45113	1.04862e-68			g39429	1.32782	5.59455e-42			g19907	1.56824	1.21595e-28			g38006	2.5037	7.87007e-56
	g5449	-1.08259	3.30605e-16								g46641	1.45079	7.46382e-303			g19964	1.32751	2.20927e-83			g4430	1.56742	1.0733e-32			g25942	2.50219	1.04214e-68
	g55886	-1.08547	3.7767e-14								g12081	1.45073	1.17751e-65			g23686	1.32748	1.44713e-95			g17171	1.56538	7.70681e-31			g16372	2.50105	2.14897e-68
	g17853	-1.08754	1.7931e-45								g61573	1.4507	2.14883e-58			g3849	1.32691	7.44769e-38			g52539	1.56508	4.4374e-111			g39962	2.50103	1.05349e-17
	g23471	-1.08764	2.34522e-63								g49876	1.45047	2.60239e-82			g16970	1.3269	2.76634e-57			g25067	1.56278	5.44308e-39			g54084	2.50019	3.00766e-116
	g28993	-1.09183	5.93342e-51								g13520	1.44903	3.9319e-75			g4283	1.32488	1.24563e-161			g42817	1.56258	4.58973e-73			g1611	2.49346	7.34457e-72
	g29659	-1.09492	1.69745e-34								g23677	1.4481	3.35559e-107			g54220	1.32409	3.13874e-150			g12045	1.56201	2.7616e-45			g38591	2.48907	8.47013e-126
	g57221	-1.09638	4.34706e-46								g50541	1.44799	2.14269e-50			g23509	1.32324	8.53854e-41			g840	1.56105	3.79646e-49			g7919	2.48855	2.06629e-41
	g20557	-1.10072	1.29489e-25								g14040	1.44712	2.49368e-62			g43080	1.32272	2.30604e-83			g13864	1.55961	1.89257e-115			g29755	2.48854	2.64169e-108
	g47099	-1.10076	0.0505347								g38707	1.44679	7.76474e-56			g63282	1.31932	1.82864e-43			g37926	1.55921	1.05371e-44			g25086	2.48695	1.19998e-39
	g25469	-1.10311	1.51147e-20								g53985	1.44649	1.6338e-106			g51716	1.31871	3.97415e-70			g58792	1.55747	3.19342e-75			g30833	2.48454	5.12967e-104
	g38111	-1.10325	3.32061e-14								g54133	1.44559	2.20983e-60			g59562	1.31812	2.55218e-106			g34030	1.55534	1.18988e-61			g42766	2.48084	3.49892e-47
	g19543	-1.10407	1.2974e-21								g31073	1.44515	4.84199e-150			g30658	1.31512	5.85284e-199			g7425	1.55502	9.92172e-116			g53874	2.48038	1.11664e-52
	g37631	-1.10785	9.98892e-48								g16990	1.44394	1.00632e-130			g23130	1.315	1.01714e-69			g35438	1.55313	7.20799e-66			g25066	2.47687	1.02952e-113
	g43057	-1.10878	3.60621e-24								g13074	1.44265	2.0696e-116			g13549	1.31327	3.34172e-57			g35279	1.55271	2.33256e-84			g33696	2.47446	8.5954e-41
	g43371	-1.11422	7.04059e-15								g54898	1.44219	4.96817e-123			g30493	1.3122	2.01602e-193			g19518	1.55229	7.34028e-113			g7746	2.47	1.5289e-48
	g3303	-1.11633	2.87058e-15								g23292	1.44022	1.28823e-77			g10078	1.31116	3.64927e-200			g56860	1.5513	3.79156e-45			g61106	2.46836	7.56623e-86
	g20390	-1.11839	1.9943e-27								g12603	1.43958	9.85496e-130			g35324	1.30954	1.32493e-107			g222	1.54859	3.74534e-46			g50408	2.46731	1.73292e-98
	g3517	-1.11999	5.18634e-28								g58779	1.43924	9.89016e-175			g30848	1.3084	6.54155e-103			g25770	1.54796	6.43801e-41			g37622	2.46603	7.97992e-110
	g12190	-1.12181	2.81853e-32								g34008	1.43893	3.26167e-96			g42137	1.30628	1.07858e-66			g59488	1.54701	3.9478e-28			g20365	2.46487	1.14093e-120
	g6090	-1.12417	2.09086e-30								g34697	1.43883	4.49817e-132			g14945	1.30538	9.8125e-84			g31361	1.5468	1.22861e-173			g17498	2.45726	4.38465e-56
	g24786	-1.12707	8.27604e-83								g55210	1.43856	9.67609e-115			g767	1.30537	1.18037e-35			g42024	1.54547	1.95845e-53			g31440	2.45602	9.50585e-42
	g137	-1.13885	8.3247e-16								g23395	1.43711	2.03598e-47			g14722	1.30304	9.31412e-55			g25682	1.54519	1.09088e-58			g61168	2.45579	2.87841e-78
	g15222	-1.14134	1.98356e-24								g16694	1.43466	2.97267e-41			g20337	1.30227	6.0785e-98			g17420	1.54441	3.43247e-240			g16559	2.44843	1.05141e-43
	g58074	-1.14282	5.28309e-40								g9386	1.43327	1.52415e-154			g31704	1.30173	2.42038e-171			g4717	1.54423	2.50745e-35			g29779	2.44746	2.01952e-57
	g38848	-1.14412	3.34177e-43								g8953	1.43303	5.78967e-261			g29828	1.30115	0			g30922	1.54355	3.07368e-28			g54898	2.44017	1.88445e-104
	g31279	-1.14658	2.70448e-80								g27206	1.43288	3.04908e-171			g31341	1.29784	7.16476e-55			g50814	1.54337	1.13893e-56			g6081	2.43933	1.1986e-75
	g38849	-1.14914	9.18762e-21								g11938	1.42958	4.64234e-93			g16577	1.29743	1.2562e-67			g12190	1.54203	4.44806e-84			g4351	2.43738	8.12543e-37
	g3811	-1.14938	5.5552e-20								g35472	1.42825	3.87521e-128			g13368	1.29628	2.82742e-67			g11938	1.54109	1.52488e-42			g60259	2.43573	5.39714e-88
	g38746	-1.15051	7.09182e-42								g4430	1.42693	1.97983e-55			g61259	1.29613	3.14792e-47			g60184	1.5407	2.6536e-90			g24329	2.43115	1.93758e-46
	g60072	-1.15082	6.15529e-44								g30602	1.42627	0			g222	1.29527	7.74409e-75			g29437	1.53796	1.1832e-122			g25621	2.42673	4.82802e-99
	g19619	-1.15169	5.25682e-23								g31012	1.42537	2.03666e-238			g29835	1.29312	1.2423e-217			g11751	1.53532	3.78535e-32			g58068	2.42578	1.14881e-101
	g13464	-1.15733	9.87009e-30								g26745	1.42381	1.45244e-206			g11864	1.29219	2.70077e-75			g58887	1.53417	2.26565e-35			g58604	2.42272	1.06909e-38
	g9997	-1.15744	2.30552e-40								g19751	1.42369	1.2362e-126			g61215	1.29205	8.15393e-60			g16584	1.53354	3.58099e-107			g26717	2.4203	1.89686e-93
	g9867	-1.15777	4.38861e-42								g43291	1.42362	1.43654e-91			g5724	1.29093	3.51901e-67			g22249	1.53344	7.66963e-80			g13870	2.41785	1.61117e-70
	g4341	-1.15833	1.5153e-59								g4730	1.42246	6.3256e-60			g58905	1.28246	8.12041e-196			g63861	1.53281	1.39514e-32			g50554	2.41486	3.31232e-39
	g59391	-1.16012	5.98395e-18								g8848	1.42193	5.04919e-77			g43333	1.28151	8.39464e-36			g5192	1.5313	1.15231e-33			g45845	2.41327	1.27667e-32
	g26682	-1.16542	1.39489e-43								g54450	1.42183	2.90374e-94			g7797	1.2801	2.44267e-249			g23491	1.531	8.81419e-37			g61470	2.41296	2.26483e-35
	g29011	-1.16581	2.08542e-14								g48359	1.42151	1.51768e-161			g14106	1.2763	5.81939e-76			g38163	1.53058	5.99466e-35			g5327	2.40188	3.30884e-64
	g24531	-1.17145	6.95412e-90								g29964	1.42012	1.67877e-259			g13499	1.27627	4.37144e-58			g31299	1.52793	6.77749e-25			g34777	2.40181	2.38271e-77
	g670	-1.17291	1.42355e-36								g30589	1.41929	2.31638e-50			g10614	1.27134	2.02391e-64			g25354	1.52625	1.157e-71			g7760	2.39958	8.32163e-65
	g9446	-1.17464	1.08098e-28								g46862	1.41721	1.22576e-153			g34079	1.26705	7.82761e-55			g24871	1.52427	5.86083e-93			g4488	2.39907	2.95589e-106
	g22892	-1.17788	2.43342e-31								g26682	1.41714	1.70038e-217			g25230	1.26661	2.37477e-176			g59839	1.51813	9.45592e-83			g60759	2.39784	7.0324e-54
	g35438	-1.18255	1.01326e-16								g15665	1.41628	1.5427e-93			g31708	1.265	1.97198e-54			g16780	1.51681	1.98425e-46			g58896	2.39663	7.1536e-57
	g55133	-1.18264	9.42156e-39								g42253	1.41561	4.46721e-71			g5238	1.26197	1.26398e-114			g34520	1.51616	1.21705e-111			g28562	2.39628	2.29306e-85
	g59772	-1.18553	8.58794e-73								g55036	1.41477	4.73572e-246			g50814	1.26168	5.04201e-64			g59630	1.51614	2.37625e-91			g60468	2.39596	1.49663e-53
	g5019	-1.18698	6.78408e-21								g60434	1.41445	6.06972e-53			g35208	1.26148	3.25252e-182			g13499	1.5152	1.46704e-38			g49819	2.39491	6.6963e-80
	g20020	-1.18867	2.32401e-36								g637	1.41367	8.90474e-53			g61572	1.25963	1.4669e-39			g21652	1.51342	1.68938e-47			g42772	2.39026	1.52822e-101
	g11708	-1.18951	3.12051e-14								g9331	1.41293	1.55909e-291			g60506	1.25783	2.43073e-122			g56530	1.51328	3.93501e-47			g41823	2.3864	3.29223e-79
	g8848	-1.19184	4.31747e-15								g29609	1.41256	1.31125e-48			g30531	1.25651	4.06253e-232			g23469	1.51254	1.77761e-175			g23469	2.38417	2.59054e-92
	g30455	-1.19222	5.1556e-48								g34275	1.41206	6.09716e-139			g59405	1.25447	1.3995e-62			g12571	1.51128	7.15773e-46			g52924	2.38145	3.42579e-133
	g965	-1.19441	4.23655e-37								g20370	1.40915	1.07189e-64			g33843	1.24991	1.23477e-256			g59813	1.51088	2.32061e-78			g19571	2.38136	2.26653e-39
	g59498	-1.19548	1.69799e-25								g54840	1.40874	4.38053e-165			g59399	1.24987	1.50685e-184			g60387	1.51077	2.90329e-88			g20633	2.38033	4.19329e-43
	g47124	-1.19914	3.53814e-27								g42910	1.40861	3.53894e-161			g59746	1.24961	1.79904e-278			g53971	1.50961	2.28827e-78			g54209	2.37887	8.16947e-37
	g20700	-1.20089	3.51466e-104								g41757	1.40564	4.14788e-54			g42984	1.2491	1.13376e-94			g9386	1.50931	3.58242e-90			g34703	2.37651	4.08229e-99
	g38063	-1.20382	1.62808e-24								g30826	1.40482	1.66552e-293			g20390	1.24863	2.17352e-103			g33843	1.50886	3.26239e-170			g18387	2.37448	8.16564e-48
	g54263	-1.20546	1.6471e-54								g41061	1.40436	1.72986e-266			g43075	1.24631	6.40824e-100			g61193	1.50871	1.10597e-53			g58915	2.37262	5.8202e-40
	g30196	-1.21304	4.72596e-25								g17891	1.40173	1.23028e-125			g10876	1.24406	3.95288e-58			g37613	1.5065	1.70559e-137			g35077	2.3719	4.06364e-33
	g25586	-1.21602	1.7809e-75								g34400	1.4005	6.45269e-117			g58342	1.24227	2.68095e-189			g35200	1.50576	2.13784e-36			g53713	2.37164	1.95627e-43
	g47083	-1.21769	2.11585e-30								g20612	1.39934	1.46664e-82			g32000	1.23873	7.55277e-130			g16577	1.50548	1.70972e-47			g63805	2.36932	2.63665e-62
	g58768	-1.21959	1.69685e-18								g47162	1.39932	6.55837e-221			g9936	1.23785	1.19092e-144			g31341	1.50357	1.93513e-39			g25987	2.36914	3.53345e-61
	g49968	-1.22034	4.56507e-40								g24298	1.39796	1.16188e-161			g58775	1.23753	1.5007e-66			g59662	1.50007	3.95047e-95			g12687	2.35975	2.05669e-73
	g42829	-1.221	8.27248e-19								g19658	1.39781	1.95582e-135			g27454	1.23727	8.36821e-35			g15319	1.49746	9.87156e-63			g54614	2.35751	1.83061e-71
	g5104	-1.221	3.47466e-83								g59147	1.39697	1.45163e-224			g48449	1.2368	3.8598e-232			g26424	1.49528	1.36931e-75			g29308	2.35423	4.68686e-35
	g30111	-1.22211	3.87079e-25								g30122	1.39688	6.85939e-184			g59817	1.23662	5.90625e-64			g61579	1.49485	1.34915e-118			g14668	2.35193	5.31439e-107
	g24811	-1.22232	8.26125e-32								g19907	1.39587	2.81012e-39			g25469	1.23514	2.15787e-91			g20583	1.49446	1.97542e-53			g58517	2.3507	3.89417e-61
	g27138	-1.22357	1.27445e-40								g9356	1.39172	0			g43088	1.23507	9.95297e-77			g42468	1.4936	5.91058e-69			g20732	2.34857	5.18122e-101
	g60044	-1.22371	1.89308e-21								g19697	1.39095	5.45979e-75			g39372	1.23403	3.61904e-37			g58376	1.48967	1.25011e-84			g21673	2.3485	7.12397e-57
	g55060	-1.22824	1.30441e-39								g43231	1.38912	2.09106e-160			g42752	1.2314	5.20845e-50			g155	1.48915	6.76613e-74			g39766	2.34482	4.82708e-98
	g30913	-1.23524	6.67996e-111								g24049	1.38854	1.53637e-141			g43657	1.23058	1.61611e-92			g10283	1.48703	1.17899e-50			g21840	2.34146	1.07526e-33
	g55139	-1.2362	1.43448e-52								g13316	1.38747	0			g24300	1.23014	6.67853e-62			g29447	1.48638	5.62425e-68			g43255	2.33893	2.59841e-41
	g58775	-1.23845	3.13803e-21								g42333	1.38535	0			g20365	1.22793	7.06713e-154			g61572	1.48552	5.06747e-19			g41717	2.33759	6.97428e-41
	g41916	-1.23905	9.00974e-28								g3436	1.37999	2.28172e-92			g27003	1.22677	2.11414e-54			g17995	1.48214	5.89025e-55			g58899	2.3372	1.08561e-27
	g30459	-1.23945	2.4812e-21								g42077	1.37885	2.5019e-150			g12716	1.22508	3.97278e-48			g47082	1.48039	6.40396e-180			g42466	2.33696	2.24046e-127
	g46702	-1.23957	2.08875e-17								g4088	1.37805	6.77791e-108			g46312	1.22327	1.29852e-137			g57652	1.47958	1.19782e-33			g11723	2.33407	1.87805e-27
	g59546	-1.23969	6.52275e-38								g1857	1.37605	3.05805e-89			g20143	1.22207	2.77362e-37			g16447	1.47936	5.62346e-114			g42541	2.33238	1.49921e-52
	g373	-1.24347	2.65014e-32								g9357	1.37498	7.69694e-86			g53971	1.22112	3.01795e-100			g3046	1.47731	2.3929e-27			g38225	2.32929	1.26321e-34
	g13559	-1.24368	3.52748e-16								g54808	1.37486	2.98725e-53			g47161	1.21996	1.7673e-52			g39022	1.47634	1.49318e-111			g55788	2.32652	6.88417e-70
	g9002	-1.24456	9.37198e-19								g16865	1.37352	1.38786e-111			g46635	1.21815	7.93807e-54			g38297	1.47492	1.37425e-24			g41000	2.32351	5.23445e-73
	g7717	-1.24592	6.51544e-20								g43465	1.37306	3.49096e-116			g50588	1.21583	1.08235e-52			g38594	1.47349	3.1356e-66			g35209	2.32019	8.24333e-88
	g13544	-1.24598	9.26179e-47								g9389	1.37282	8.7094e-71			g19585	1.21521	2.27234e-51			g31091	1.47238	9.7727e-28			g25759	2.32012	7.46695e-57
	g14677	-1.24726	1.44751e-30								g4934	1.37067	1.55512e-129			g42476	1.21491	1.73315e-39			g756	1.46642	4.45871e-115			g17995	2.32001	4.24641e-84
	g38594	-1.24842	7.05278e-33								g58992	1.37051	6.39991e-107			g23679	1.21077	2.29894e-30			g60377	1.46563	1.10932e-26			g59764	2.31882	9.54221e-40
	g708	-1.24875	8.82853e-22								g34471	1.36757	5.19157e-103			g9386	1.20932	3.93507e-133			g25751	1.46432	2.76019e-68			g46364	2.31352	1.21479e-34
	g13494	-1.2509	1.3917e-30								g63573	1.36641	5.97311e-72			g45422	1.20864	2.19364e-32			g9381	1.46236	2.68101e-39			g60530	2.31177	5.53106e-83
	g43384	-1.25127	6.45783e-20								g9017	1.36554	5.9417e-91			g41810	1.2073	3.89065e-70			g60521	1.4598	2.53229e-161			g42959	2.30903	2.10979e-37
	g29555	-1.2559	1.70483e-19								g25770	1.36507	7.58899e-85			g14294	1.20724	7.99203e-230			g57577	1.45919	2.34915e-100			g59980	2.30783	7.7872e-29
	g12467	-1.25868	3.06938e-27								g9422	1.36471	3.91512e-63			g59030	1.20588	1.06765e-51			g41081	1.45752	2.96552e-59			g48704	2.30649	3.97303e-94
	g6911	-1.26265	2.32112e-18								g42080	1.3639	6.57918e-87			g53097	1.20545	1.47923e-31			g59748	1.45591	6.56862e-32			g4717	2.30522	1.06246e-53
	g34063	-1.26322	1.77454e-41								g5499	1.36374	2.874e-216			g50242	1.20493	5.38623e-40			g41702	1.45312	1.08115e-22			g4518	2.30322	9.91271e-36
	g58640	-1.26452	7.2681e-26								g23756	1.3622	2.85326e-162			g20448	1.20207	3.69469e-192			g25256	1.45004	6.80281e-81			g12300	2.30304	5.49861e-49
	g57590	-1.26876	2.78931e-43								g43242	1.36104	5.09329e-199			g11707	1.19883	3.28231e-41			g34063	1.44823	1.2655e-75			g51049	2.30044	1.34367e-56
	g47776	-1.26901	1.35176e-27								g43172	1.36069	3.6455e-49			g58779	1.1965	5.92459e-106			g19281	1.44624	4.26497e-35			g15319	2.29876	3.25093e-104
	g60090	-1.26942	5.18058e-86								g60362	1.36	0			g19907	1.19622	1.19793e-47			g25543	1.44441	4.06353e-40			g59006	2.29444	1.70459e-73
	g42984	-1.2734	3.66289e-28								g19675	1.3597	0			g50350	1.19241	7.85593e-27			g3876	1.44404	7.51071e-31			g59949	2.29309	1.56553e-74
	g58528	-1.28541	1.99536e-16								g13544	1.35969	3.63845e-147			g41916	1.1923	3.48462e-84			g26682	1.44338	6.03866e-102			g47262	2.29236	4.01919e-29
	g5128	-1.2871	1.18836e-28								g9446	1.35842	4.06271e-118			g23363	1.19227	7.23606e-72			g39341	1.44017	7.2116e-34			g41861	2.29191	1.06604e-73
	g20442	-1.28727	2.91073e-55								g1266	1.35782	3.56699e-77			g43587	1.19177	4.06289e-98			g4784	1.43803	2.74662e-73			g11613	2.29133	2.16293e-17
	g43291	-1.28774	1.10149e-25								g31550	1.35747	3.75428e-70			g14160	1.19108	1.45194e-76			g24665	1.43798	5.1397e-23			g34414	2.28966	2.76446e-65
	g25320	-1.2889	2.46913e-19								g30454	1.35674	1.74612e-62			g59420	1.19044	1.97299e-49			g49362	1.43713	2.61018e-47			g37633	2.28907	3.08025e-84
	g56530	-1.29005	4.24208e-19								g48462	1.35613	1.9196e-54			g39981	1.19013	5.63258e-30			g27237	1.42762	1.55317e-24			g60394	2.28701	1.05176e-72
	g26092	-1.29219	6.54294e-19								g63762	1.35571	9.3367e-56			g42771	1.18967	9.94337e-250			g58844	1.42272	1.07022e-46			g46350	2.28689	2.46557e-95
	g26877	-1.29252	1.56963e-38								g46330	1.35496	5.87136e-183			g54450	1.18856	2.15366e-61			g23756	1.42183	8.78419e-71			g25446	2.2867	1.37599e-28
	g60258	-1.29255	2.21924e-47								g33083	1.35456	6.55915e-127			g42682	1.18649	1.53094e-48			g9247	1.42161	4.47236e-61			g59062	2.27871	2.08015e-46
	g61218	-1.29771	2.14498e-16								g20967	1.35322	1.85437e-221			g31176	1.18578	1.11064e-32			g35727	1.42149	1.50127e-82			g39172	2.27698	2.59647e-40
	g9358	-1.29948	1.03168e-23								g31299	1.35294	2.16693e-51			g8879	1.1844	2.01199e-31			g27233	1.41596	3.05692e-25			g8960	2.27556	1.70568e-55
	g60259	-1.30358	1.80877e-16								g16577	1.35284	1.9837e-64			g16584	1.18249	2.17978e-115			g30602	1.41435	1.55209e-157			g50216	2.2731	4.31401e-51
	g41859	-1.30442	7.77756e-29								g30074	1.35267	1.45231e-67			g34063	1.18244	1.53639e-91			g45600	1.41369	1.61967e-46			g33871	2.27234	5.01642e-78
	g33343	-1.30567	2.74856e-23								g1171	1.35201	7.09965e-70			g30511	1.18174	7.52658e-36			g36402	1.41289	2.29043e-35			g60384	2.2721	1.20301e-23
	g41993	-1.3106	1.16878e-54								g20273	1.35062	3.32591e-279			g23763	1.18116	2.85906e-37			g61121	1.41247	8.40359e-56			g49504	2.26853	1.69644e-46
	g59006	-1.31131	1.98482e-22								g40686	1.35057	5.49052e-93			g47391	1.18104	2.98781e-45			g42420	1.41113	6.69592e-36			g63871	2.26701	3.59731e-76
	g59664	-1.31163	4.27683e-21								g61218	1.34996	2.04463e-89			g18102	1.17967	4.00248e-75			g64112	1.40808	6.71417e-15			g55669	2.26213	2.29735e-84
	g13368	-1.31445	2.18815e-19								g35432	1.34936	6.13833e-267			g29063	1.17926	1.67218e-105			g43384	1.40723	1.88503e-43			g1093	2.26147	1.08837e-97
	g25070	-1.31628	1.34667e-81								g44493	1.34872	2.84471e-75			g30787	1.17912	5.18144e-28			g33881	1.40586	1.83893e-25			g103	2.26062	1.14419e-33
	g23292	-1.31632	2.61563e-23								g43230	1.34845	3.24752e-236			g55886	1.17881	3.10679e-42			g13666	1.4058	6.86463e-29			g42099	2.26012	2.15155e-97
	g13292	-1.31837	3.2886e-71								g61075	1.34596	4.45988e-42			g30603	1.17736	2.24153e-45			g4730	1.40351	8.0719e-34			g54454	2.25848	6.29225e-75
	g55011	-1.32113	6.2116e-41								g5261	1.34559	1.46837e-58			g16903	1.17721	3.65491e-54			g30459	1.40189	1.74694e-37			g941	2.25718	8.91688e-64
	g54278	-1.32167	3.65348e-17								g307	1.34556	1.31637e-67			g30392	1.17659	9.08426e-46			g54808	1.40125	1.6048e-24			g25626	2.25676	4.42843e-44
	g38360	-1.32651	6.81322e-71								g20732	1.34326	2.90072e-135			g51050	1.1759	1.15234e-166			g47842	1.40087	3.33728e-26			g411	2.25415	1.10434e-50
	g63857	-1.3313	1.53817e-23								g25316	1.34267	1.31576e-111			g31515	1.17416	2.85621e-48			g5499	1.39889	1.90268e-109			g37055	2.25271	5.58815e-111
	g880	-1.33402	2.66744e-80								g10161	1.34223	5.96716e-67			g54808	1.17408	7.71477e-44			g20390	1.39854	4.11441e-67			g24686	2.24575	2.75383e-97
	g55154	-1.33705	8.52799e-22								g16447	1.34171	2.99113e-208			g25621	1.17315	7.33284e-97			g60456	1.39212	5.70879e-22			g8941	2.24467	3.90008e-96
	g51966	-1.33822	2.07374e-17								g4304	1.34129	7.6085e-56			g47083	1.1731	4.49e-65			g35285	1.39189	2.55952e-26			g25915	2.23997	1.52582e-54
	g54742	-1.34159	1.8629e-60								g53978	1.33968	5.15683e-48			g34164	1.17237	1.74729e-42			g42984	1.38999	2.6258e-48			g17800	2.23933	9.79344e-46
	g13510	-1.34576	3.48965e-39								g26957	1.33858	1.99384e-117			g41062	1.17074	1.48519e-138			g31291	1.38719	7.80471e-16			g44493	2.23755	2.56489e-86
	g58509	-1.35336	2.08868e-25								g4419	1.33781	3.16578e-157			g59748	1.16914	1.66054e-54			g35826	1.38694	1.69735e-62			g14040	2.23667	2.57468e-64
	g54450	-1.35722	6.56377e-28								g63332	1.33746	4.28376e-230			g37368	1.16563	2.73228e-111			g46567	1.38589	1.88312e-29			g53610	2.23483	1.3526e-47
	g35324	-1.3592	4.42668e-28								g59676	1.33662	1.32821e-166			g58913	1.16556	9.59445e-60			g15222	1.38509	2.92451e-52			g24776	2.23435	3.87333e-60
	g55874	-1.35951	1.19703e-20								g36777	1.33479	1.32231e-43			g58683	1.16525	4.74612e-79			g59849	1.38378	1.44765e-32			g35208	2.22881	2.75728e-82
	g39268	-1.35955	2.91788e-111								g19964	1.33465	1.10519e-53			g45750	1.16507	8.78567e-74			g1266	1.38302	1.20377e-42			g60161	2.22573	3.03452e-96
	g59354	-1.35976	1.49347e-48								g49968	1.33412	2.87189e-153			g351	1.16417	2.23065e-89			g42862	1.38217	1.37731e-23			g55745	2.2241	2.41511e-30
	g48704	-1.36097	7.71972e-22								g33892	1.33366	1.63269e-156			g42380	1.15918	2.62111e-106			g24688	1.3809	6.72336e-46			g59771	2.21979	2.50737e-27
	g47401	-1.36281	2.0033e-24								g59930	1.33354	2.35256e-66			g5088	1.15815	1.52569e-155			g55788	1.37996	1.67482e-33			g59085	2.21976	1.55526e-39
	g43242	-1.36605	4.67126e-77								g16584	1.33305	1.15954e-188			g16447	1.15643	7.55904e-129			g58683	1.37683	3.21632e-46			g59249	2.21561	8.86654e-38
	g19697	-1.36832	3.07378e-19								g51051	1.33208	1.21863e-96			g35194	1.15547	1.28372e-88			g43657	1.37406	1.0173e-69			g30602	2.21483	9.22083e-103
	g12495	-1.36958	5.7552e-52								g649	1.33176	9.63182e-97			g60184	1.15546	1.84201e-107			g1857	1.37312	1.56685e-30			g5396	2.21266	2.98848e-82
	g17056	-1.37104	2.32645e-20								g24688	1.33172	2.34953e-101			g41702	1.15389	2.91648e-37			g20738	1.37276	3.7555e-30			g59996	2.20987	2.69837e-78
	g34970	-1.38574	2.7143e-31								g13867	1.3312	2.81706e-195			g50526	1.15346	2.63936e-49			g29828	1.3712	8.43931e-193			g32000	2.20919	6.12828e-91
	g42468	-1.38625	2.99934e-28								g34303	1.33032	6.57302e-117			g9406	1.1534	3.65591e-56			g41810	1.36934	8.68575e-45			g61004	2.207	1.14893e-36
	g25402	-1.38992	8.32349e-18								g20445	1.32848	1.21615e-39			g29591	1.15201	6.37379e-90			g13464	1.36881	2.63279e-51			g25960	2.19983	7.19056e-48
	g30549	-1.39068	4.94077e-64								g56456	1.32844	1.15211e-83			g15610	1.14976	1.91348e-41			g25789	1.36672	4.01579e-84			g26394	2.19962	1.44705e-39
	g9931	-1.40885	4.93133e-22								g16474	1.32722	2.33817e-263			g17446	1.14962	1.92408e-66			g25933	1.36657	3.84845e-87			g1856	2.19934	1.65393e-38
	g18954	-1.4092	5.14354e-41								g4931	1.32711	2.45698e-165			g63923	1.14846	2.11451e-113			g5396	1.36657	1.21473e-92			g17891	2.1959	3.57499e-84
	g14945	-1.41046	2.05673e-18								g50458	1.32703	1.18619e-104			g54778	1.14793	1.31252e-48			g60506	1.36431	1.64328e-70			g59089	2.19589	4.20258e-83
	g17064	-1.41368	4.3262e-24								g54387	1.32687	1.86471e-51			g31435	1.1467	4.10567e-112			g60535	1.36342	1.09727e-24			g8969	2.19223	7.3788e-95
	g26849	-1.41438	7.35494e-77								g50426	1.32643	5.35205e-79			g43893	1.14338	3.93801e-38			g45278	1.36249	4.87624e-39			g4352	2.19087	3.87785e-41
	g46272	-1.41495	2.93002e-47								g25701	1.32602	2.54503e-104			g63942	1.14293	2.0562e-83			g60270	1.36185	1.34989e-77			g19203	2.18835	1.85658e-32
	g865	-1.41637	3.81902e-82								g38549	1.32557	5.00983e-281			g59820	1.13947	3.13205e-28			g19585	1.35976	1.20756e-25			g50541	2.18748	1.80496e-38
	g13499	-1.41658	1.3546e-31								g4951	1.32487	2.06668e-154			g9453	1.13926	4.36413e-59			g58768	1.35923	6.92033e-48			g38588	2.1829	3.26718e-53
	g3888	-1.41756	1.10231e-49								g55133	1.32332	4.5397e-131			g59226	1.13912	1.42547e-134			g9997	1.35916	1.02043e-64			g25442	2.18109	6.68182e-47
	g50364	-1.41813	8.26927e-35								g29855	1.32295	2.3665e-103			g9776	1.1389	8.26766e-144			g21709	1.35911	1.5349e-75			g54335	2.17702	4.23123e-81
	g46798	-1.41853	1.49299e-43								g13429	1.32081	4.81495e-138			g13242	1.13809	3.41122e-41			g41824	1.3554	4.65851e-15			g56872	2.17237	1.59938e-60
	g51051	-1.41941	3.45227e-35								g35324	1.32068	2.80711e-101			g26162	1.13555	1.09622e-100			g54278	1.35416	2.23522e-23			g24687	2.17231	7.37158e-104
	g5119	-1.42493	1.49894e-29								g58905	1.31928	5.06274e-199			g14679	1.13385	1.51784e-27			g35468	1.35408	1.26162e-119			g14825	2.17021	2.0009e-97
	g34400	-1.42888	1.48668e-33								g34254	1.31877	5.65438e-153			g756	1.13318	1.53662e-127			g9422	1.35202	7.83453e-38			g38080	2.16726	9.40924e-36
	g30596	-1.43088	4.66728e-20								g63124	1.31875	4.10715e-47			g20442	1.13266	7.06764e-103			g26957	1.35111	4.73674e-56			g36154	2.16476	2.87931e-29
	g12825	-1.43813	3.87284e-18								g49453	1.31704	2.05823e-59			g4068	1.13167	1.30103e-30			g34781	1.34987	5.60568e-30			g42614	2.16048	4.61865e-56
	g307	-1.43954	9.92071e-25								g19518	1.3154	4.07337e-101			g21485	1.1297	6.98537e-128			g25925	1.34953	7.08516e-68			g59216	2.15691	4.31354e-40
	g25262	-1.43958	4.41276e-42								g52539	1.31492	1.10513e-172			g26877	1.12939	1.66572e-66			g40877	1.34946	5.9965e-136			g21244	2.15685	4.43855e-118
	g50512	-1.44132	4.95266e-58								g756	1.31443	3.4611e-182			g46566	1.12824	1.6389e-63			g59	1.34819	2.70114e-68			g13858	2.15424	2.81714e-56
	g50588	-1.44606	5.20253e-33								g56442	1.31301	1.96909e-39			g22405	1.12709	5.82107e-40			g43966	1.34637	7.31372e-39			g43202	2.15179	1.6155e-59
	g59089	-1.45491	4.02322e-36								g60556	1.3111	5.3868e-122			g47404	1.12512	2.13661e-42			g60366	1.34624	5.55604e-24			g2631	2.15167	2.65316e-47
	g1862	-1.45898	8.22354e-39								g58720	1.31037	1.05715e-157			g24296	1.12494	1.41551e-47			g46272	1.34564	1.2411e-49			g5019	2.15079	3.2505e-76
	g31515	-1.45972	1.05418e-30								g53750	1.30989	2.44365e-91			g46241	1.12248	9.82813e-41			g43039	1.34495	1.70489e-23			g7977	2.14935	1.43702e-27
	g37926	-1.46207	7.87956e-24								g30581	1.30475	8.28892e-109			g34802	1.12241	1.93176e-106			g60434	1.34376	4.09231e-19			g61512	2.14758	2.07407e-54
	g49445	-1.46291	6.55739e-34								g13368	1.30398	8.73003e-85			g53706	1.1208	7.57685e-92			g23292	1.3425	3.7208e-29			g29434	2.14372	2.969e-41
	g4488	-1.46728	2.26284e-44								g30046	1.30303	5.50278e-73			g29080	1.11949	1.6779e-36			g35117	1.34223	2.27514e-32			g34886	2.14102	1.03247e-43
	g46237	-1.4674	2.85927e-53								g14886	1.3018	1.93451e-43			g58565	1.11932	4.99627e-178			g31626	1.34187	4.18528e-133			g11767	2.13767	3.50352e-34
	g25770	-1.46867	2.66518e-35								g12467	1.29939	4.69748e-85			g55261	1.11891	0			g54742	1.34183	6.30032e-91			g5556	2.13665	5.59013e-64
	g54978	-1.4711	5.80592e-30								g5128	1.29873	3.13287e-69			g23233	1.11662	8.19159e-104			g11708	1.33991	2.34652e-31			g36868	2.13484	3.52334e-28
	g20603	-1.47129	6.14352e-43								g42987	1.29814	0			g58358	1.11638	4.71053e-42			g373	1.33767	1.60477e-58			g19577	2.13459	4.79307e-34
	g27227	-1.47196	1.93425e-35								g24714	1.29798	8.99689e-65			g55028	1.11554	4.23514e-79			g54820	1.33623	5.52371e-97			g26743	2.13418	1.7651e-50
	g24340	-1.47377	8.09517e-82								g30105	1.29708	4.53813e-123			g54953	1.11534	9.89185e-78			g58979	1.33599	1.92001e-135			g43060	2.13188	5.04699e-34
	g53642	-1.47486	2.0303e-17								g855	1.29634	4.67616e-41			g8704	1.11404	3.62406e-52			g12705	1.33557	1.96769e-53			g53996	2.12766	4.66202e-73
	g12571	-1.48067	7.3225e-30								g54321	1.29394	2.74879e-172			g25097	1.11404	6.01539e-34			g2049	1.33491	4.2973e-32			g60482	2.12761	1.14719e-25
	g43657	-1.4816	1.37929e-59								g12495	1.29209	2.1454e-108			g6295	1.11388	1.85048e-42			g54844	1.33463	1.04355e-23			g549	2.12579	2.75933e-76
	g5251	-1.48418	1.56151e-30								g16769	1.29203	2.13857e-48			g21727	1.11364	5.1947e-96			g38549	1.33395	4.06406e-139			g21475	2.12374	2.03755e-59
	g17457	-1.48467	2.08023e-44								g13501	1.29085	6.23363e-35			g54858	1.11303	4.61388e-92			g50242	1.33137	4.14976e-32			g59562	2.12237	1.59897e-51
	g42526	-1.48992	1.30477e-41								g30178	1.28959	8.68974e-48			g34054	1.11178	4.47495e-35			g30966	1.33071	1.92014e-36			g19884	2.11721	1.62031e-24
	g59165	-1.49562	8.48492e-66								g30596	1.28909	1.13793e-65			g1331	1.111	7.29251e-41			g10666	1.32927	1.26186e-58			g59514	2.11351	2.13966e-72
	g6070	-1.49806	1.7122e-61								g34510	1.28835	4.37403e-66			g55874	1.11009	7.50359e-39			g31012	1.32921	1.93512e-99			g26089	2.11326	5.9169e-71
	g30105	-1.5012	2.75752e-25								g4486	1.28799	3.99339e-267			g26028	1.10999	5.61468e-31			g17987	1.32886	5.29843e-13			g20372	2.11249	3.6851e-30
	g60364	-1.50122	4.18405e-54								g54983	1.28708	2.22663e-37			g47082	1.10839	1.46151e-276			g58139	1.32854	2.58203e-145			g29618	2.11205	5.49268e-34
	g34961	-1.50816	1.25844e-23								g38297	1.28645	1.32834e-38			g1019	1.1057	0			g60556	1.32846	2.60642e-61			g34491	2.10662	5.78143e-35
	g13429	-1.51455	3.56702e-76								g42323	1.28473	3.03994e-103			g30879	1.10493	3.29871e-26			g59622	1.32538	5.16074e-76			g46312	2.10593	1.7753e-96
	g42772	-1.51506	2.20259e-35								g53971	1.2846	1.51129e-125			g58605	1.10485	6.39689e-42			g60530	1.32535	1.006e-94			g13387	2.10494	2.52998e-29
	g16584	-1.5152	1.78036e-82								g54607	1.28393	1.51469e-35			g50275	1.10367	6.9119e-31			g2267	1.32458	2.40492e-103			g1820	2.1048	1.29578e-36
	g35612	-1.5206	6.37957e-33								g24356	1.2835	2.48216e-62			g19032	1.10126	1.75441e-31			g42476	1.31622	8.33362e-21			g48359	2.1047	1.1531e-76
	g8285	-1.52605	2.00116e-39								g58580	1.28331	5.19142e-61			g30955	1.10002	5.35339e-42			g30360	1.3158	1.93891e-15			g54325	2.10438	2.29495e-76
	g14886	-1.52818	3.18075e-28								g50408	1.28174	7.55695e-163			g44467	1.09996	8.74216e-30			g43333	1.31309	8.7019e-17			g30051	2.10191	6.03178e-101
	g54321	-1.53007	1.98009e-43								g30909	1.28171	3.25198e-151			g47637	1.09839	4.04569e-80			g60458	1.31066	2.45307e-67			g49876	2.09772	9.29176e-85
	g46358	-1.53292	1.61268e-31								g20376	1.28091	2.19413e-241			g19619	1.09636	6.57087e-53			g337	1.31032	8.1601e-78			g9591	2.09646	2.82607e-39
	g59249	-1.53722	4.72783e-17								g49880	1.27971	1.32656e-135			g9143	1.09627	1.45594e-69			g13429	1.30942	8.31083e-64			g9781	2.09316	1.06567e-56
	g29017	-1.54107	3.26901e-45								g5556	1.27754	3.94332e-62			g29221	1.09625	9.26653e-101			g41817	1.30866	4.89146e-42			g59325	2.09014	5.23579e-47
	g55618	-1.54327	4.68416e-58								g14398	1.27562	1.01403e-118			g13700	1.09349	2.96084e-23			g59930	1.30839	4.04654e-22			g58992	2.08945	3.01579e-73
	g30618	-1.5438	1.13761e-32								g1899	1.2755	4.66791e-185			g20571	1.09286	8.63093e-84			g17267	1.30775	1.13715e-81			g35622	2.08457	1.67525e-52
	g61168	-1.54454	1.04694e-26								g9997	1.27502	4.71714e-133			g55297	1.09188	4.07181e-104			g41916	1.30702	1.49874e-53			g50550	2.08419	1.79356e-34
	g39022	-1.54544	2.90727e-71								g31341	1.27486	5.51143e-49			g49783	1.08873	6.67429e-40			g43136	1.30494	5.71664e-66			g30657	2.08016	1.06503e-79
	g42079	-1.54572	1.28649e-53								g49726	1.27471	1.8887e-78			g55333	1.0829	2.31098e-37			g4934	1.30468	8.56946e-63			g5285	2.08	4.02136e-31
	g42992	-1.54573	1.16722e-25								g60564	1.2727	3.19202e-35			g23292	1.08236	3.01679e-42			g9848	1.30464	1.12422e-20			g4403	2.0796	4.10919e-28
	g26126	-1.54657	5.47873e-38								g43274	1.27158	4.6583e-193			g7665	1.0819	6.29724e-44			g39758	1.30397	1.55445e-50			g17046	2.07824	2.96313e-32
	g9422	-1.55229	2.39407e-22								g15672	1.27083	1.38604e-51			g26540	1.08189	9.77214e-51			g43230	1.30333	2.39021e-99			g54746	2.07692	4.0737e-53
	g43230	-1.55248	1.69486e-109								g25942	1.26895	1.13892e-41			g59662	1.08141	9.9718e-99			g23509	1.30218	3.1314e-30			g46829	2.07666	5.90316e-113
	g52539	-1.5543	1.72697e-67								g30560	1.26611	3.44287e-46			g47332	1.08109	2.08872e-38			g61215	1.29907	1.85906e-20			g38048	2.07665	3.56398e-27
	g9720	-1.55638	8.07413e-39								g60222	1.2651	1.28668e-108			g29911	1.07883	5.10484e-88			g59676	1.29838	2.07236e-84			g35092	2.07639	2.43367e-46
	g55009	-1.55763	2.06225e-46								g43182	1.26252	1.32269e-38			g47181	1.07727	9.90923e-64			g55154	1.29781	1.32393e-27			g30151	2.07495	1.06162e-58
	g5499	-1.56117	1.97539e-94								g60949	1.26142	2.76404e-34			g46266	1.07536	3.05825e-68			g58565	1.29777	7.74379e-119			g58528	2.07334	1.34583e-50
	g42454	-1.56158	1.18138e-63								g55139	1.26138	3.84897e-148			g61107	1.07381	4.61644e-149			g31262	1.29657	7.10393e-24			g26158	2.07178	1.12824e-50
	g27206	-1.56373	1.8921e-79								g6082	1.26101	6.05729e-44			g1857	1.07364	6.52072e-37			g22416	1.2944	1.41507e-143			g42874	2.07145	8.30459e-103
	g25507	-1.5643	1.46257e-105								g48426	1.25808	1.96414e-244			g2628	1.07347	8.12011e-53			g60587	1.29427	1.76442e-55			g59846	2.06836	3.21485e-83
	g255	-1.56594	1.05546e-101								g58960	1.25355	1.57013e-291			g30974	1.07304	1.32703e-27			g54255	1.29335	5.96776e-43			g60253	2.06511	2.98099e-34
	g30074	-1.56646	2.94487e-28								g42946	1.25243	4.16896e-45			g39368	1.07266	2.06311e-77			g58905	1.28852	1.22007e-116			g13279	2.06264	5.28222e-38
	g60222	-1.56697	3.71417e-78								g24360	1.25012	1.91234e-71			g53937	1.07102	3.06289e-25			g39429	1.28795	1.94326e-13			g26092	2.06001	2.62416e-55
	g60029	-1.56838	4.08811e-54								g58719	1.24977	2.07765e-36			g41714	1.071	3.26029e-41			g55139	1.2858	1.65313e-71			g34481	2.0595	6.16664e-62
	g50282	-1.56974	6.34381e-59								g41713	1.24896	2.62718e-87			g34970	1.0668	5.24839e-42			g60258	1.28376	2.23848e-52			g259	2.0591	2.47096e-35
	g13533	-1.57552	3.32091e-88								g43233	1.24895	7.50954e-129			g17457	1.06652	1.81827e-68			g29911	1.28369	4.74513e-62			g38367	2.05792	2.87382e-50
	g25230	-1.57852	6.09618e-56								g29828	1.24641	4.93652e-302			g59574	1.06553	4.21159e-34			g30178	1.28212	1.0576e-19			g54343	2.05783	3.67739e-47
	g26957	-1.58027	6.79633e-57								g5740	1.24639	7.16624e-75			g20239	1.06395	2.60054e-33			g55639	1.28073	2.38537e-20			g9268	2.0552	3.68476e-55
	g11938	-1.58178	3.61263e-35								g30111	1.24581	9.71687e-75			g31053	1.06173	1.25209e-53			g36804	1.28044	8.35407e-21			g39321	2.05496	6.38354e-99
	g58779	-1.58317	5.81212e-69								g8285	1.24485	1.75427e-73			g46132	1.05935	1.45101e-23			g34697	1.27755	2.57943e-46			g38394	2.04966	6.86465e-48
	g26017	-1.58769	4.19297e-17								g34999	1.24473	1.12048e-196			g49028	1.05638	4.00174e-31			g20143	1.27683	4.88058e-16			g31036	2.04939	5.73315e-44
	g31012	-1.58841	5.75435e-96								g38013	1.24349	5.15447e-122			g14100	1.05467	2.10039e-126			g43075	1.27554	3.39831e-42			g59152	2.04897	5.63683e-56
	g19751	-1.58843	3.77508e-55								g34063	1.24232	6.36136e-127			g20371	1.05409	1.2025e-54			g61211	1.27527	1.1635e-61			g51051	2.04816	4.31591e-83
	g34697	-1.58909	1.89699e-65								g9281	1.24011	9.7822e-53			g59458	1.05404	4.65977e-43			g20577	1.27435	1.47634e-116			g36877	2.04804	1.06392e-74
	g9781	-1.5906	2.3376e-30								g42462	1.23924	1.15901e-70			g48288	1.05313	8.47467e-46			g4304	1.27424	1.18967e-21			g16865	2.04796	7.68344e-62
	g42542	-1.59663	2.34812e-48								g20557	1.23913	1.17933e-82			g7425	1.05308	1.04461e-114			g34015	1.2733	1.98101e-33			g60221	2.04493	1.09831e-22
	g54338	-1.59741	6.36153e-74								g1862	1.2379	1.30175e-76			g7924	1.05139	5.26718e-101			g10614	1.27183	4.37332e-28			g50910	2.04224	3.41281e-84
	g20606	-1.59758	2.89403e-87								g42088	1.23621	8.04345e-72			g46847	1.05012	2.29199e-75			g30151	1.27	1.96976e-19			g3844	2.0404	3.91111e-71
	g53750	-1.60031	9.72395e-32								g13533	1.23489	2.06986e-150			g34766	1.04938	8.39519e-69			g5724	1.2697	8.79157e-30			g44374	2.03901	2.16724e-96
	g4088	-1.60165	8.44231e-36								g27166	1.23475	2.48156e-43			g54784	1.04912	2.26681e-104			g36777	1.26871	1.17022e-18			g63816	2.0354	6.0211e-67
	g17371	-1.60244	3.18469e-23								g24812	1.23423	1.05147e-57			g49362	1.0487	7.93129e-52			g5146	1.26785	7.71364e-69			g50376	2.03308	1.23553e-28
	g29855	-1.60423	5.47907e-64								g31168	1.23388	6.75854e-36			g8438	1.04847	2.22056e-24			g34766	1.2672	2.57433e-55			g42768	2.03109	7.10045e-33
	g48426	-1.60451	1.16209e-69								g50282	1.23326	2.03259e-104			g60440	1.04622	4.05815e-55			g38746	1.2605	2.53646e-61			g26746	2.02841	1.28592e-47
	g26424	-1.60671	2.16871e-64								g14390	1.23265	1.04501e-91			g48141	1.04618	1.32759e-59			g6094	1.26003	1.53593e-43			g55280	2.0269	7.88908e-22
	g24714	-1.60713	1.95902e-42								g25004	1.23261	3.57377e-31			g54742	1.04568	5.40454e-97			g43242	1.25968	3.47721e-81			g49470	2.02653	3.8247e-77
	g39766	-1.61203	1.40489e-72								g59781	1.23053	5.41706e-170			g25923	1.04504	1.3923e-80			g61218	1.25597	2.16263e-40			g61478	2.02441	1.72134e-31
	g54840	-1.61229	7.77567e-87								g50364	1.22789	2.42562e-63			g60521	1.04088	3.54045e-173			g20612	1.25365	8.23148e-29			g30533	2.02323	4.27428e-53
	g4934	-1.61318	6.67797e-66								g46297	1.2248	4.79978e-111			g30185	1.03857	2.89351e-24			g50588	1.25077	1.16511e-26			g58774	2.02217	4.66004e-72
	g30344	-1.61395	4.54491e-27								g439	1.22428	4.28418e-39			g33345	1.03751	4.98278e-36			g59147	1.25075	1.26693e-80			g3272	2.01543	6.49294e-34
	g30533	-1.61396	6.66293e-39								g38848	1.22239	1.4426e-102			g42454	1.03472	5.7712e-71			g43088	1.24836	1.82038e-35			g45843	2.01427	6.93213e-83
	g30122	-1.61427	7.17957e-76								g42046	1.22082	9.31895e-43			g42480	1.03375	3.90275e-67			g23763	1.24507	3.84754e-22			g41736	2.01357	2.19344e-36
	g33778	-1.61503	5.60497e-35								g62134	1.22065	3.40347e-44			g38746	1.03025	2.19297e-99			g23238	1.24326	1.07659e-95			g50609	2.0127	1.13318e-50
	g24686	-1.61547	1.15825e-93								g30051	1.21902	4.50886e-178			g4934	1.02973	5.45166e-73			g28201	1.24059	3.37757e-32			g8027	2.01262	2.72281e-32
	g19658	-1.61791	9.86835e-46								g54742	1.21797	1.45395e-163			g155	1.02971	7.76737e-56			g1862	1.24034	1.84061e-36			g54336	2.0098	2.74828e-28
	g26924	-1.61956	6.05043e-175								g222	1.21787	3.51373e-51			g20612	1.0294	1.40295e-43			g44493	1.23825	1.38896e-38			g50118	2.00784	1.26016e-22
	g42817	-1.6206	2.81011e-56								g4538	1.21759	2.74204e-95			g26424	1.02739	2.91369e-65			g63249	1.23781	1.31764e-34			g59391	2.00761	1.83381e-61
	g30493	-1.62236	2.16004e-111								g4710	1.21748	9.41049e-165			g1199	1.02629	2.44632e-72			g50275	1.23391	2.78573e-12			g24665	2.00197	2.34988e-49
	g61576	-1.62439	1.72858e-26								g59863	1.21747	3.08236e-217			g61168	1.02521	5.31053e-52			g9065	1.23234	1.29e-51			g18704	1.99959	7.00512e-43
	g21429	-1.62563	1.55726e-70								g880	1.21731	1.57191e-177			g60914	1.02513	4.68845e-44			g13510	1.23026	1.17105e-50			g29900	1.99828	4.7943e-30
	g48659	-1.63233	8.46539e-80								g60046	1.21708	1.16449e-144			g60135	1.02468	4.42719e-71			g4449	1.23015	5.92434e-111			g9290	1.99467	1.39379e-64
	g42874	-1.6399	3.84989e-169								g39022	1.21602	2.63002e-150			g35097	1.02457	6.37241e-106			g34970	1.22588	1.57696e-27			g56684	1.99289	1.03488e-29
	g12193	-1.64635	1.0879e-38								g20528	1.21543	4.1427e-49			g43487	1.02255	2.64535e-38			g26745	1.22475	7.38713e-72			g60440	1.99288	1.44138e-53
	g60914	-1.66135	4.90148e-33								g5570	1.21491	2.58006e-38			g30046	1.02044	5.57512e-40			g21727	1.22246	4.86486e-53			g7665	1.99029	1.93774e-55
	g59177	-1.66224	3.71882e-112								g13934	1.21406	1.7272e-47			g17063	1.02032	3.16598e-34			g29855	1.22183	1.5759e-47			g60531	1.98703	5.19837e-89
	g29911	-1.66591	1.43142e-105								g30333	1.2126	1.1594e-172			g11938	1.02015	1.28703e-37			g29049	1.22109	2.75983e-58			g3436	1.98283	6.67798e-80
	g48359	-1.6673	1.16222e-61								g17064	1.21197	7.86081e-39			g55639	1.01875	6.05037e-28			g29434	1.22052	7.35523e-24			g18089	1.97882	1.55108e-54
	g19278	-1.66801	4.23152e-72								g12687	1.2117	5.10526e-45			g61061	1.01819	9.58963e-40			g55099	1.22051	4.38304e-31			g25602	1.97788	9.45438e-28
	g10283	-1.67107	5.39333e-42								g10024	1.2103	1.29719e-177			g60882	1.01714	3.11495e-80			g4683	1.2186	3.13949e-21			g195	1.97714	5.62243e-40
	g9456	-1.6711	2.54769e-60								g53496	1.20974	1.05168e-41			g7921	1.01626	2.30017e-124			g4904	1.21839	1.78982e-44			g21675	1.97512	1.1853e-51
	g14106	-1.67177	3.18877e-35								g20434	1.20608	2.78346e-135			g1862	1.0162	1.52113e-43			g61192	1.21803	5.30397e-37			g19544	1.9717	2.47046e-43
	g46312	-1.67984	1.13321e-76								g44152	1.20576	3.30307e-128			g29385	1.01198	2.34457e-53			g48359	1.21791	2.08924e-55			g31515	1.9708	1.61384e-71
	g756	-1.68268	4.55677e-104								g9867	1.20529	2.19453e-105			g10283	1.01172	1.13925e-54			g26126	1.21757	7.03773e-43			g44392	1.96968	1.09392e-28
	g42462	-1.68509	2.25655e-57								g60767	1.20413	1.1531e-42			g34186	1.0081	7.25696e-26			g34365	1.21747	1.12542e-17			g60786	1.96962	1.29507e-40
	g20733	-1.68744	1.00545e-25								g52794	1.2034	3.37193e-44			g30602	1.00687	4.23073e-173			g34932	1.2156	8.51655e-21			g29963	1.96887	1.86225e-90
	g9065	-1.6875	3.46518e-40								g48659	1.2033	1.06475e-116			g30459	1.00681	3.27826e-27			g11864	1.21492	7.42651e-32			g59849	1.96777	3.02368e-69
	g55713	-1.68751	1.54944e-24								g42420	1.20276	1.46503e-54			g50211	1.00426	1.4765e-93			g24975	1.21443	5.15651e-23			g50523	1.96716	4.46903e-69
	g42987	-1.68862	4.0311e-227								g37926	1.20274	4.54153e-51			g24688	1.00333	2.40046e-49			g42253	1.21319	1.66428e-27			g38	1.9652	1.25557e-45
	g60521	-1.69262	8.86823e-104								g33871	1.20271	7.82473e-49			g24811	1.00066	2.33243e-53			g54461	1.21172	2.76651e-105			g41716	1.96488	3.85239e-26
	g59232	-1.69718	1.87866e-87								g9933	1.2019	7.07951e-229			g34414	-1.00161	2.21229e-25			g56032	1.21113	4.73507e-15			g50356	1.96414	1.37938e-63
	g21727	-1.69747	3.41175e-74								g25320	1.2016	1.25499e-57			g39213	-1.00185	1.04005e-95			g4951	1.21065	1.62694e-70			g33843	1.95976	4.5667e-83
	g38013	-1.69753	2.15682e-43								g22892	1.20151	2.69336e-61			g62795	-1.00419	3.07196e-138			g34079	1.21058	1.23671e-26			g30935	1.95861	1.9789e-58
	g9389	-1.69769	9.12595e-48								g17317	1.20009	5.39972e-157			g54230	-1.02201	1.26826e-28			g11707	1.20906	4.04157e-15			g26126	1.95725	6.49133e-60
	g58165	-1.71252	2.24573e-123								g34183	1.19822	0			g59468	-1.02941	5.00717e-60			g42829	1.20755	6.35469e-30			g46692	1.95548	2.82427e-44
	g762	-1.71387	4.05146e-102								g20603	1.19779	7.38659e-76			g50610	-1.02988	1.13569e-23			g20239	1.20653	1.38295e-16			g43226	1.9517	1.90177e-38
	g35117	-1.71423	4.40063e-34								g4464	1.19677	2.14478e-60			g8240	-1.03034	4.9017e-77			g27206	1.20565	6.9333e-57			g12785	1.95125	2.56351e-48
	g51746	-1.71764	2.02917e-80								g54643	1.19594	1.55227e-44			g25775	-1.03071	2.02814e-32			g45955	1.20537	1.04513e-15			g9782	1.95042	9.21049e-25
	g59676	-1.71801	2.60407e-104								g34439	1.1957	2.07948e-63			g29769	-1.03285	1.84226e-39			g35310	1.2052	4.59761e-33			g5392	1.94686	9.74148e-51
	g15665	-1.72441	2.3947e-33								g59232	1.19561	1.07615e-93			g26854	-1.03492	6.50563e-37			g25435	1.20446	2.19362e-83			g58752	1.94684	3.10907e-87
	g1857	-1.73067	6.66307e-36								g35457	1.19423	1.26207e-43			g5457	-1.0405	9.912e-117			g54282	1.20431	8.17994e-21			g40165	1.94498	4.7367e-29
	g25437	-1.73451	5.14795e-41								g9279	1.19423	5.92229e-27			g49934	-1.059	6.04587e-41			g51716	1.20308	5.56635e-31			g60201	1.94089	2.96636e-16
	g30510	-1.73609	6.6399e-147								g29659	1.19069	1.85627e-95			g20278	-1.06168	1.35695e-171			g27642	1.20296	1.72942e-31			g17323	1.93984	4.4192e-75
	g55653	-1.73653	1.1667e-39								g13499	1.18992	7.39763e-57			g42544	-1.07421	2.18979e-53			g39372	1.20291	2.48883e-23			g9904	1.93953	2.07145e-85
	g9357	-1.7378	3.74777e-43								g42454	1.18981	1.19443e-126			g30691	-1.07487	4.81321e-128			g34481	1.20253	7.79413e-49			g31495	1.93731	2.79631e-30
	g32000	-1.73807	2.28773e-65								g1093	1.18927	1.59106e-170			g9817	-1.0764	1.00183e-73			g30589	1.20241	3.70277e-15			g4169	1.93414	2.62083e-85
	g61034	-1.73852	6.35281e-30								g30331	1.1865	4.44973e-65			g41750	-1.07724	8.62525e-88			g22405	1.19996	1.48229e-22			g58580	1.92254	2.57588e-41
	g649	-1.74047	7.26888e-62								g55009	1.18624	2.41657e-83			g20590	-1.08081	8.48027e-55			g37368	1.19866	7.87169e-60			g9100	1.92176	3.61901e-31
	g3046	-1.74078	1.11535e-30								g46102	1.18542	8.05009e-179			g38706	-1.08566	2.93689e-160			g13337	1.19847	2.54392e-72			g24373	1.91628	6.9231e-32
	g9783	-1.74148	3.77066e-67								g56530	1.18529	3.72881e-59			g41998	-1.08599	2.92207e-38			g46862	1.19736	1.26508e-55			g26804	1.91588	3.06336e-18
	g26089	-1.74494	4.98249e-45								g74	1.18336	1.04961e-130			g5139	-1.08776	2.81563e-55			g61319	1.19608	8.54426e-49			g47018	1.91288	1.31385e-47
	g9455	-1.74627	3.94929e-115								g41670	1.18214	5.99627e-37			g5251	-1.08891	1.55593e-24			g34543	1.19494	3.83961e-43			g407	1.90953	9.89278e-44
	g43724	-1.74772	5.97528e-55								g53996	1.18195	1.32856e-58			g31823	-1.08921	3.99098e-177			g27227	1.19433	6.37989e-62			g54257	1.90925	5.62981e-27
	g24360	-1.75006	2.16828e-39								g13510	1.1812	1.78658e-95			g24795	-1.09293	1.42108e-33			g53985	1.1933	8.27197e-35			g49445	1.90656	2.4966e-62
	g41824	-1.75055	1.51062e-32								g47189	1.18006	1.20072e-35			g860	-1.09527	8.13575e-72			g29978	1.18731	4.66169e-26			g25343	1.8976	2.8331e-26
	g63923	-1.75523	7.67213e-92								g51716	1.17894	1.1605e-50			g14843	-1.1001	2.25396e-54			g53097	1.18433	1.93315e-13			g63762	1.89528	1.49157e-07
	g61319	-1.75779	7.60699e-84								g35093	1.17769	9.20854e-197			g24664	-1.10529	5.80495e-77			g12603	1.18404	3.84031e-36			g41935	1.89216	1.19522e-42
	g60387	-1.76319	1.87555e-100								g30808	1.17588	2.12296e-209			g13992	-1.10583	2.90201e-54			g61314	1.18279	8.58449e-15			g30857	1.88885	2.72429e-96
	g21475	-1.76363	8.33783e-26								g25437	1.17554	6.44862e-66			g35340	-1.11245	6.6036e-32			g43900	1.18126	2.62747e-66			g26813	1.88859	5.03067e-46
	g13337	-1.76913	2.31951e-134								g37934	1.17257	2.10545e-32			g25417	-1.11336	8.45482e-73			g9281	1.18024	3.73076e-17			g57590	1.88626	5.34846e-70
	g29609	-1.77544	2.66962e-29								g27642	1.1724	1.24889e-55			g21704	-1.11609	1.16108e-90			g29385	1.17883	8.43738e-28			g1274	1.88493	3.40624e-39
	g58778	-1.78128	2.18598e-32								g55713	1.16922	9.57927e-57			g35211	-1.11616	8.02344e-49			g24431	1.17837	5.19266e-27			g46703	1.88091	7.25312e-60
	g16054	-1.79073	5.53672e-27								g34365	1.1687	1.94581e-32			g47074	-1.11626	2.46121e-127			g29609	1.17704	1.21944e-12			g21638	1.87711	8.91269e-22
	g7168	-1.7916	9.61059e-46								g50512	1.16704	9.02544e-115			g12785	-1.12099	8.2613e-50			g4813	1.17538	1.35944e-17			g42023	1.87653	3.74846e-56
	g12524	-1.79547	1.57415e-169								g30459	1.16671	1.04655e-52			g46617	-1.12122	1.30243e-182			g59048	1.1718	1.99015e-41			g24688	1.87628	1.00032e-57
	g16577	-1.79667	1.46002e-38								g54917	1.16663	0			g19709	-1.12314	2.23511e-104			g24869	1.1703	5.58456e-29			g60922	1.8733	4.05523e-27
	g9381	-1.79686	3.48003e-49								g18954	1.16599	3.18916e-159			g33945	-1.12489	3.89338e-42			g351	1.17013	3.71552e-42			g46400	1.87319	1.34179e-39
	g58720	-1.79709	5.76344e-128								g26012	1.16504	1.56978e-227			g43575	-1.12944	1.95426e-73			g42454	1.16944	1.56061e-56			g74	1.87302	1.94343e-73
	g49726	-1.79811	1.67775e-48								g47370	1.16466	7.71781e-42			g53745	-1.13674	2.88331e-98			g9357	1.16787	3.83091e-36			g13193	1.87232	6.74361e-26
	g27642	-1.79902	2.8611e-51								g29514	1.16451	3.02922e-34			g50548	-1.13987	2.19227e-100			g48659	1.16673	1.66129e-51			g1857	1.8723	5.40715e-49
	g54387	-1.80073	2.20367e-51								g20271	1.16414	3.1485e-138			g29907	-1.14105	9.76821e-52			g3524	1.16621	7.82143e-24			g60848	1.87169	1.82057e-59
	g9247	-1.80356	8.38923e-81								g2049	1.16261	7.64007e-43			g219	-1.14307	2.46871e-156			g55851	1.16612	9.83769e-16			g42390	1.87049	6.33675e-45
	g9386	-1.80675	1.27457e-79								g17271	1.16256	2.32032e-95			g55009	-1.14363	4.72658e-33			g13494	1.16603	1.52183e-48			g54063	1.86853	1.89238e-45
	g20663	-1.80692	6.28607e-52								g30344	1.16236	4.02748e-68			g25677	-1.14667	3.33746e-57			g9456	1.16576	5.77353e-33			g52259	1.86555	2.48647e-24
	g4737	-1.80898	3.32615e-75								g17408	1.16189	4.04222e-83			g29616	-1.14818	5.43605e-121			g50350	1.16526	3.72658e-15			g55531	1.86431	2.83499e-45
	g31550	-1.80904	4.59193e-63								g31262	1.16123	1.38482e-39			g31856	-1.15281	1.5275e-71			g59030	1.16322	3.56295e-21			g20584	1.86416	1.84074e-51
	g18227	-1.81066	4.20399e-35								g41859	1.16077	6.82908e-68			g977	-1.16186	8.55793e-42			g286	1.15909	5.57603e-12			g14636	1.86156	3.92275e-31
	g54117	-1.8114	1.37147e-23								g41916	1.16075	5.22671e-77			g23987	-1.16435	4.35658e-89			g55594	1.15907	3.99165e-26			g34970	1.86116	9.0957e-57
	g54744	-1.81145	1.19253e-58								g7665	1.15842	1.61426e-58			g31464	-1.16475	5.69457e-29			g30051	1.15863	2.14519e-105			g50536	1.858	8.32242e-22
	g63942	-1.81324	2.97537e-59								g5109	1.15358	2.72736e-42			g1276	-1.16581	6.27361e-87			g55194	1.15811	9.69113e-29			g48720	1.85588	8.39948e-28
	g10077	-1.8179	1.96014e-65								g60364	1.15335	6.9001e-74			g5403	-1.17254	3.37062e-90			g9859	1.15554	7.00113e-57			g49453	1.8535	1.04432e-40
	g59601	-1.81932	1.13509e-95								g7736	1.15208	7.27814e-42			g46564	-1.17495	9.26803e-229			g54376	1.15493	4.20091e-56			g30055	1.85314	6.5525e-26
	g30966	-1.8228	1.49723e-50								g42817	1.15048	1.48951e-82			g25077	-1.17647	6.97467e-64			g8434	1.14916	0			g17890	1.84735	5.29589e-19
	g43465	-1.8242	2.9122e-67								g49471	1.14761	2.39371e-41			g38169	-1.18392	5.14313e-16			g8848	1.14906	2.67225e-21			g59601	1.84698	1.17604e-84
	g30909	-1.82433	3.35214e-108								g59601	1.14737	6.19192e-125			g20406	-1.18497	1.11813e-134			g24811	1.14863	3.78357e-38			g5104	1.84547	6.36364e-89
	g2049	-1.82473	6.85764e-34								g21429	1.14685	1.96231e-105			g47244	-1.18827	1.6812e-115			g9446	1.14694	1.1535e-35			g50222	1.84532	2.08149e-51
	g7425	-1.82605	1.67084e-121								g4169	1.14581	6.82651e-157			g20526	-1.19485	5.12527e-83			g27166	1.14582	8.47326e-18			g50146	1.84017	4.97473e-39
	g25933	-1.83261	1.11601e-128								g29842	1.14547	9.58944e-74			g9895	-1.19589	7.67038e-98			g49968	1.14548	2.49123e-46			g30188	1.83955	1.04804e-20
	g54784	-1.83294	2.55343e-111								g38682	1.14373	9.7149e-102			g17201	-1.19675	3.54426e-56			g46266	1.14512	9.9644e-42			g46297	1.83949	8.20953e-59
	g33083	-1.83351	6.00802e-32								g25402	1.14365	7.02588e-54			g15866	-1.19967	1.52074e-77			g60019	1.14416	7.76751e-20			g60918	1.83938	2.52214e-68
	g30046	-1.83633	2.36589e-48								g10039	1.14344	1.81453e-278			g25580	-1.20578	3.12244e-56			g34439	1.14369	3.87262e-23			g25410	1.83931	4.76648e-159
	g9268	-1.83915	5.36588e-37								g59177	1.1434	1.27607e-170			g47774	-1.20846	5.65526e-38			g32000	1.14194	3.57473e-68			g25984	1.83908	8.26924e-88
	g7665	-1.84075	4.79078e-41								g8434	1.14234	0			g42978	-1.20911	5.81286e-56			g649	1.1402	3.35835e-36			g34361	1.83891	2.03812e-37
	g26162	-1.84445	1.12748e-87								g55594	1.14204	1.28068e-40			g59698	-1.21267	1.87322e-51			g30955	1.13932	7.69516e-20			g64070	1.83885	4.04694e-24
	g20371	-1.84977	8.31494e-50								g50777	1.14067	7.70733e-43			g54780	-1.21376	3.16476e-62			g48476	1.13552	1.17214e-13			g42862	1.83805	2.81894e-31
	g61211	-1.86015	4.11207e-103								g17087	1.1402	1.75055e-126			g43297	-1.21522	1.24091e-114			g61259	1.13398	3.34154e-18			g59795	1.83798	1.53395e-58
	g34439	-1.86347	5.25397e-55								g20390	1.13982	1.40942e-93			g6158	-1.22555	1.66809e-97			g55874	1.12975	1.24416e-22			g35826	1.83795	6.71253e-68
	g42380	-1.86434	1.03139e-91								g34766	1.13919	1.20844e-96			g38036	-1.23349	1.01847e-118			g49726	1.12867	5.91426e-28			g25620	1.83667	1.12822e-32
	g2628	-1.86624	1.04219e-50								g59431	1.13846	4.02173e-41			g29200	-1.23774	7.42521e-39			g36141	1.12817	7.18678e-27			g9245	1.83569	6.88414e-26
	g60587	-1.86887	4.01074e-59								g34970	1.13601	3.68772e-62			g38300	-1.24148	2.26442e-91			g12467	1.12814	2.96726e-27			g20911	1.83413	1.21776e-27
	g55028	-1.87123	5.2122e-70								g9455	1.13481	5.23915e-105			g47256	-1.24293	2.07028e-43			g50512	1.12679	1.866e-48			g5108	1.83372	1.01104e-23
	g59622	-1.87921	1.35082e-117								g63132	1.13391	6.68165e-40			g47	-1.24901	5.30484e-45			g59781	1.12664	7.70876e-65			g16992	1.82996	4.70332e-22
	g60407	-1.88543	9.47991e-34								g51746	1.13259	5.31137e-129			g9360	-1.25377	3.58672e-81			g582	1.12569	3.26078e-16			g14605	1.82753	2.26346e-41
	g50814	-1.8858	2.26333e-54								g61314	1.13135	7.65641e-36			g34361	-1.25631	4.0598e-49			g5109	1.12569	1.49054e-14			g54852	1.82752	4.48227e-42
	g74	-1.89094	1.35062e-98								g55261	1.13062	0			g12645	-1.25665	1.45806e-65			g43291	1.12561	3.36755e-23			g12718	1.82706	1.7487e-37
	g59110	-1.89411	1.14585e-21								g59748	1.13007	3.86999e-31			g23939	-1.2569	5.58734e-118			g20584	1.12497	1.6109e-29			g31704	1.82486	3.60928e-76
	g29049	-1.8994	3.87835e-115								g28943	1.12939	1.67756e-138			g23468	-1.25781	1.29761e-60			g42046	1.12435	2.1671e-18			g20733	1.82462	2.07975e-41
	g17401	-1.9006	1.65137e-102								g13640	1.12804	2.25361e-22			g64116	-1.26081	4.80114e-66			g4283	1.12328	1.83137e-50			g20612	1.8187	5.30179e-52
	g46870	-1.90413	8.50571e-128								g20413	1.1262	3.57504e-62			g42145	-1.261	2.48727e-65			g30581	1.12324	3.9127e-39			g14294	1.81775	5.13449e-71
	g43234	-1.90576	3.13013e-119								g26924	1.12554	7.8894e-205			g34710	-1.26408	2.601e-56			g20831	1.12306	5.6559e-35			g16786	1.81483	1.33427e-53
	g60848	-1.90621	4.77583e-58								g21444	1.12404	3.74537e-52			g26999	-1.26531	1.11154e-101			g59405	1.1221	3.8917e-21			g12283	1.81316	1.40374e-20
	g55304	-1.90793	2.02704e-64								g30791	1.12316	7.4638e-90			g61216	-1.26648	9.18868e-75			g6081	1.12084	8.01614e-38			g30618	1.80869	8.72961e-52
	g55297	-1.91314	2.86877e-147								g59664	1.12307	6.03173e-47			g14672	-1.27085	6.48862e-117			g30046	1.12003	4.57862e-24			g19663	1.80847	2.8903e-19
	g21451	-1.91316	2.10451e-20								g24296	1.123	3.29363e-52			g46602	-1.2723	3.58189e-47			g16514	1.11984	4.9991e-26			g33592	1.8079	7.97746e-58
	g20732	-1.91329	2.51091e-75								g25262	1.12078	1.12865e-68			g45799	-1.27371	6.26392e-81			g334	1.11904	6.00898e-17			g59972	1.80749	6.27542e-60
	g29434	-1.92143	1.23042e-39								g58683	1.11757	1.64764e-53			g16744	-1.27377	1.90673e-69			g24049	1.11727	3.55792e-54			g9250	1.80578	6.01717e-26
	g20612	-1.92216	4.19678e-45								g47457	1.11681	2.05287e-188			g8995	-1.28022	2.3022e-51			g26877	1.11625	3.29246e-37			g45502	1.80291	6.60046e-21
	g46862	-1.92425	2.14384e-89								g43657	1.11679	4.5893e-100			g42717	-1.28602	4.42874e-53			g56005	1.11524	2.08227e-62			g60571	1.80238	1.98331e-18
	g9342	-1.92477	3.2459e-188								g29911	1.11544	3.98072e-111			g63984	-1.28807	2.6208e-82			g46312	1.11171	1.47864e-73			g58138	1.80209	2.14837e-29
	g53996	-1.92781	4.98812e-47								g19538	1.11323	3.70537e-55			g26047	-1.28955	2.01643e-114			g24541	1.11078	3.02342e-63			g54597	1.79863	3.3086e-45
	g153	-1.92918	6.84757e-36								g58895	1.11295	1.25705e-80			g41957	-1.29002	2.6879e-42			g54744	1.11048	4.97604e-28			g30460	1.79708	4.70221e-62
	g30808	-1.92956	5.85166e-199								g59249	1.1118	1.38593e-33			g43167	-1.29023	2.1277e-122			g41111	1.10823	3.75264e-13			g42801	1.79488	2.06537e-32
	g49362	-1.93193	5.73129e-58								g42468	1.11038	1.59336e-73			g52942	-1.2917	2.60856e-72			g18102	1.10716	1.06849e-24			g9877	1.79479	1.2639e-37
	g41713	-1.93865	1.19545e-43								g42079	1.1041	1.78723e-103			g41887	-1.29344	8.27258e-66			g43465	1.10628	3.69309e-36			g46863	1.79436	6.18504e-33
	g42910	-1.9391	1.10769e-67								g59772	1.10168	1.49627e-150			g26886	-1.30259	2.02402e-43			g6593	1.10536	1.96994e-14			g33881	1.79402	7.63894e-57
	g43233	-1.94066	1.02608e-86								g28201	1.1004	1.16713e-45			g8786	-1.30745	3.98057e-59			g8969	1.10216	1.28649e-92			g38222	1.79343	2.05749e-27
	g24869	-1.94374	3.28394e-60								g54850	1.09842	6.15533e-134			g59752	-1.31001	1.6843e-61			g13668	1.10042	1.47123e-15			g12377	1.7922	3.07559e-43
	g42253	-1.94752	1.45133e-53								g39320	1.09831	1.87473e-34			g29299	-1.31336	3.67932e-198			g24531	1.09821	4.60594e-84			g63857	1.79173	2.98554e-44
	g28943	-1.94787	1.6484e-119								g23491	1.09698	5.9648e-30			g29422	-1.31343	2.34454e-50			g47083	1.09728	2.24719e-34			g12574	1.79091	1.30466e-40
	g34766	-1.94904	2.63994e-109								g46350	1.0955	1.75531e-87			g40897	-1.32152	3.44971e-104			g30833	1.09663	5.07953e-23			g9941	1.78725	7.7004e-62
	g28394	-1.95068	1.55074e-78								g34414	1.09539	3.54077e-34			g32116	-1.32421	8.02366e-54			g50777	1.09518	2.70263e-22			g25618	1.78607	1.23307e-79
	g25925	-1.95575	3.19294e-102								g762	1.09512	1.0061e-105			g50608	-1.32477	5.81154e-177			g54840	1.09442	8.09908e-48			g64074	1.78513	2.25097e-18
	g28201	-1.95732	4.65079e-49								g43234	1.09499	6.72718e-118			g63563	-1.32687	4.92686e-65			g24296	1.09431	1.82207e-29			g42134	1.78493	1.61322e-21
	g31465	-1.9617	2.92733e-66								g35092	1.09208	2.95577e-56			g38710	-1.32752	6.79405e-63			g31407	1.09392	2.8491e-18			g61323	1.7821	1.10026e-16
	g33843	-1.96185	2.13314e-129								g42661	1.09133	1.37974e-72			g20519	-1.32841	9.20089e-101			g9996	1.09312	8.979e-22			g9720	1.78124	2.84376e-51
	g24296	-1.96277	3.17965e-50								g61253	1.08957	2.52496e-108			g38186	-1.32965	2.48427e-63			g48094	1.09272	4.98216e-22			g9065	1.78057	6.6281e-57
	g60689	-1.96997	1.60151e-113								g24531	1.08616	2.16197e-178			g36877	-1.33259	1.14391e-34			g17087	1.09232	8.85234e-55			g24627	1.78038	1.78422e-72
	g59700	-1.97048	2.07986e-46								g41111	1.08383	2.74114e-29			g34162	-1.33486	6.0638e-85			g30808	1.09157	8.37968e-92			g42867	1.78015	1.04097e-72
	g37207	-1.97438	9.16997e-111								g13120	1.08378	1.36263e-59			g35068	-1.33929	2.01352e-48			g19751	1.08763	1.34973e-31			g14886	1.77953	5.99578e-32
	g42035	-1.97655	5.56195e-64								g9859	1.08307	1.07739e-97			g39285	-1.3441	4.66762e-110			g57460	1.08742	1.43846e-22			g34945	1.77682	5.46173e-41
	g15319	-1.98157	2.26648e-54								g12825	1.08241	1.33752e-41			g54136	-1.34491	6.34909e-181			g47370	1.08276	4.1227e-21			g9279	1.77676	1.52559e-35
	g60458	-1.98259	1.47283e-99								g43899	1.08228	1.78785e-44			g54346	-1.34621	3.10897e-126			g63573	1.08188	1.03244e-12			g24296	1.77608	4.42355e-46
	g20736	-1.98925	1.45465e-48								g39164	1.08193	1.41315e-34			g1275	-1.34725	5.41572e-51			g54084	1.07907	3.52418e-30			g60709	1.77536	3.0444e-45
	g50458	-1.99107	3.05821e-38								g51025	1.08169	1.0064e-188			g42575	-1.35342	3.05271e-107			g31708	1.07788	2.33191e-15			g4284	1.771	2.94432e-91
	g63249	-1.99112	5.90688e-65								g30618	1.0809	3.63299e-42			g11485	-1.35349	2.22432e-136			g47181	1.07664	1.78279e-36			g59664	1.7699	5.61995e-44
	g63573	-1.99698	1.80121e-43								g20550	1.08015	4.33253e-44			g19028	-1.35847	2.08709e-49			g7921	1.07525	1.44e-71			g31439	1.76966	4.16616e-25
	g26685	-1.99843	1.68333e-149								g42339	1.07947	5.03379e-149			g12509	-1.3594	3.81597e-57			g47332	1.0738	1.74481e-15			g34371	1.76921	3.34932e-40
	g60184	-2.00051	3.64181e-87								g59813	1.07845	7.80767e-82			g53807	-1.36264	1.70774e-74			g2882	1.07369	8.33707e-15			g9783	1.76872	1.55571e-56
	g685	-2.00236	5.02294e-93								g33778	1.07723	2.02876e-40			g41746	-1.36265	1.15318e-231			g55133	1.07154	2.12987e-38			g60080	1.76796	2.28937e-25
	g30602	-2.00528	7.69027e-156								g58565	1.07626	4.97737e-175			g1436	-1.36271	3.33487e-68			g53706	1.06726	3.87008e-32			g28563	1.76624	4.3353e-32
	g29758	-2.00675	5.87015e-47								g29841	1.07618	2.19457e-153			g29195	-1.37733	3.73947e-98			g59574	1.06662	1.79697e-13			g3046	1.76426	1.40215e-41
	g4441	-2.01164	3.19502e-93								g61189	1.07367	6.32576e-26			g9483	-1.37855	3.76557e-93			g50364	1.06643	2.94971e-22			g3854	1.76414	2.44544e-43
	g26012	-2.02211	7.47041e-185								g12045	1.06804	2.27705e-41			g12354	-1.38354	1.89159e-47			g49470	1.06622	4.44118e-46			g53894	1.76315	5.07617e-25
	g54344	-2.02662	4.09988e-93								g60689	1.06719	1.87304e-139			g33880	-1.38605	7.20985e-182			g58358	1.06508	2.41176e-15			g54387	1.76209	4.25859e-43
	g20337	-2.02972	2.78098e-74								g9348	1.06582	4.98602e-30			g40968	-1.39725	2.00039e-74			g55333	1.06285	2.33176e-14			g41796	1.76147	1.42904e-17
	g59048	-2.03159	5.37302e-84								g9002	1.06542	4.79681e-25			g11668	-1.39968	2.92132e-106			g60848	1.06155	9.65585e-25			g63395	1.75965	1.69046e-68
	g12603	-2.0346	5.77037e-86								g5655	1.06383	3.39937e-63			g59568	-1.40437	3.27671e-134			g16903	1.0613	9.58443e-15			g25789	1.75815	4.55957e-56
	g30519	-2.03667	4.05932e-42								g38746	1.06362	2.10917e-83			g20026	-1.40494	4.70908e-63			g54858	1.06099	1.68235e-41			g59797	1.75806	1.60069e-31
	g31610	-2.03691	1.6185e-80								g39268	1.06357	7.67e-193			g23740	-1.40513	1.26908e-68			g29659	1.06036	4.0844e-40			g43457	1.75797	1.52526e-75
	g29842	-2.04031	5.74337e-80								g29978	1.06329	2.39698e-53			g35021	-1.40613	2.87877e-236			g19671	1.05931	1.77747e-28			g20840	1.75536	1.04917e-79
	g49304	-2.0433	7.94291e-27								g6070	1.06253	1.22219e-78			g463	-1.41224	1.38551e-72			g48288	1.05931	8.4966e-21			g34862	1.75424	2.69722e-22
	g55788	-2.04385	7.9568e-40								g38199	1.0623	9.20921e-45			g603	-1.417	1.58318e-57			g827	1.05902	3.19827e-52			g46506	1.75183	2.2037e-26
	g37076	-2.04533	1.02612e-47								g25507	1.0618	2.38518e-126			g42961	-1.42149	4.52791e-78			g24714	1.05795	1.20961e-19			g46289	1.75033	5.2739e-30
	g9904	-2.04692	4.14168e-188								g31571	1.05981	4.90672e-30			g35135	-1.42423	1.50279e-97			g59214	1.05748	2.77082e-24			g8122	1.74945	1.35544e-22
	g35357	-2.04919	5.13353e-37								g59165	1.05961	2.14168e-121			g61055	-1.42893	8.06336e-116			g41950	1.05695	5.93043e-17			g24884	1.74899	1.03798e-36
	g13218	-2.05247	3.11403e-67								g58961	1.05853	4.14539e-144			g13073	-1.4296	3.70102e-73			g14160	1.05611	2.00389e-27			g8728	1.74892	6.80395e-82
	g40686	-2.05813	6.14059e-72								g14749	1.0571	6.12513e-139			g54432	-1.43018	1.25496e-88			g7665	1.05548	1.02012e-28			g17063	1.748	5.41189e-32
	g35003	-2.06149	1.02873e-54								g41897	1.05664	1.64765e-27			g43656	-1.4405	2.99366e-42			g5238	1.05505	4.26965e-34			g8902	1.74697	2.74134e-34
	g58992	-2.0615	5.92665e-76								g5119	1.05496	4.15844e-42			g63735	-1.44099	2.22596e-189			g37076	1.05381	1.87811e-20			g34543	1.74606	3.84049e-80
	g55036	-2.06282	5.60998e-212								g57460	1.0536	2.90038e-35			g11793	-1.44822	1.10197e-60			g24090	1.0535	8.80217e-47			g58453	1.74558	3.55327e-32
	g43232	-2.06508	4.54249e-95								g34422	1.05285	2.09263e-34			g14242	-1.44859	1.07129e-88			g58775	1.05336	2.47912e-23			g55284	1.74534	2.05431e-63
	g58580	-2.06642	7.99308e-48								g50412	1.05211	2.29107e-98			g41974	-1.44967	1.72074e-60			g61523	1.05282	1.32009e-13			g17401	1.74409	7.27263e-80
	g53496	-2.0671	4.97954e-42								g48678	1.0518	1.10057e-42			g20374	-1.46268	3.87542e-43			g5128	1.05253	4.30643e-15			g42682	1.74284	4.38106e-37
	g47370	-2.07272	5.94535e-49								g60815	1.05083	1.44676e-76			g31411	-1.4651	3.26761e-51			g16369	1.05233	2.49482e-108			g47130	1.74209	7.72387e-82
	g55238	-2.08336	3.02052e-58								g59764	1.05013	1.30515e-31			g12517	-1.46548	9.72601e-50			g23395	1.05138	1.0061e-13			g16378	1.74182	1.11507e-33
	g53985	-2.08984	5.71216e-82								g42772	1.04912	3.08798e-47			g55219	-1.4661	3.75884e-60			g42682	1.0509	2.47401e-13			g5449	1.74058	5.72656e-40
	g31361	-2.09004	4.68227e-238								g8550	1.04498	7.67509e-39			g13518	-1.47073	8.99868e-59			g48141	1.04998	3.34858e-30			g59621	1.74056	6.63665e-46
	g4538	-2.09321	3.24714e-83								g30455	1.04494	2.02971e-111			g38185	-1.47172	1.74997e-78			g5570	1.04674	4.33245e-13			g30185	1.74022	1.66954e-30
	g29447	-2.10032	1.66315e-69								g30913	1.04431	9.73486e-192			g47680	-1.47773	1.35447e-63			g31162	1.04561	1.87148e-58			g46475	1.74013	1.07497e-25
	g9936	-2.10064	5.49392e-136								g42984	1.04417	5.89141e-47			g12175	-1.48077	1.08379e-88			g42877	1.04469	4.33071e-13			g42454	1.73958	2.98965e-68
	g24356	-2.10245	5.41739e-60								g54746	1.04301	6.0326e-41			g29607	-1.48392	7.58427e-95			g52794	1.04437	1.0131e-15			g40628	1.7384	8.64425e-98
	g46350	-2.10314	1.61765e-94								g58651	1.04283	1.34778e-134			g14633	-1.48422	3.39019e-66			g196	1.04422	5.08923e-20			g26910	1.7379	3.9539e-19
	g46703	-2.1048	3.9158e-50								g35285	1.04207	4.41655e-29			g25976	-1.48843	4.14221e-171			g34275	1.04367	8.18294e-57			g41669	1.73752	3.06413e-30
	g7924	-2.10659	3.68565e-126								g27138	1.04112	3.23261e-65			g25356	-1.49155	2.01419e-54			g44467	1.04178	2.34847e-11			g7296	1.73609	2.8808e-27
	g4558	-2.11012	4.40008e-31								g36804	1.03966	2.18486e-33			g54990	-1.49546	6.90791e-121			g47161	1.03811	5.1882e-13			g34118	1.73574	2.60221e-28
	g59662	-2.1102	3.8106e-168								g60072	1.03861	3.76086e-94			g59454	-1.49602	1.49217e-60			g25821	1.03599	9.35943e-30			g47414	1.73162	5.34639e-28
	g20413	-2.11191	7.85537e-36								g24663	1.03579	6.2463e-222			g10264	-1.49935	1.60472e-89			g30111	1.03503	5.95223e-22			g708	1.72835	3.29497e-24
	g21709	-2.12011	4.71994e-141								g25586	1.03427	1.63831e-137			g11681	-1.51405	1.85284e-164			g25469	1.03284	1.76839e-24			g25614	1.72745	5.86282e-53
	g23756	-2.12081	2.92432e-111								g59546	1.03338	8.44682e-65			g12238	-1.51658	1.26475e-77			g20557	1.03156	1.20941e-30			g13949	1.72645	3.42956e-12
	g22416	-2.12345	3.82843e-276								g54338	1.03012	3.18225e-126			g62735	-1.5203	3.88455e-62			g42339	1.02797	5.43089e-72			g28201	1.72494	2.17518e-12
	g30331	-2.12702	1.67247e-45								g1069	1.0288	3.66462e-119			g38686	-1.52514	2.51877e-71			g9268	1.02681	1.58908e-15			g55011	1.72317	4.92117e-50
	g17499	-2.13634	6.58551e-47								g25522	1.02836	1.15921e-26			g193	-1.5254	3.07196e-55			g13549	1.02664	2.65493e-12			g43239	1.72129	3.90877e-58
	g47162	-2.13678	1.1567e-184								g46702	1.02836	6.17315e-30			g35205	-1.52767	2.49975e-48			g19538	1.02495	5.21827e-26			g44425	1.71743	3.02746e-34
	g4169	-2.14093	4.59179e-186								g31407	1.02783	1.13833e-33			g60710	-1.52779	8.49379e-73			g29063	1.02101	3.18102e-35			g5010	1.71734	3.0688e-28
	g26745	-2.1485	6.38773e-156								g21727	1.02706	6.31415e-86			g55098	-1.5285	2.41845e-84			g10077	1.021	5.862e-36			g39116	1.7169	3.5822e-21
	g29023	-2.15427	6.17743e-71								g46798	1.02636	1.53963e-132			g42657	-1.52911	1.87214e-216			g74	1.01862	2.11565e-53			g59	1.71499	2.47173e-27
	g13381	-2.15559	2.67121e-63								g17499	1.02481	2.04753e-55			g26774	-1.53502	9.69294e-216			g880	1.01839	1.32304e-67			g13559	1.7145	2.15685e-32
	g24688	-2.16057	8.22934e-72								g13559	1.02475	4.1032e-32			g13408	-1.53729	2.51933e-170			g48678	1.01738	1.70358e-16			g55289	1.71437	4.11956e-36
	g36877	-2.16201	2.57347e-60								g23509	1.02439	4.98544e-85			g15692	-1.53753	1.56926e-108			g30618	1.01665	3.91126e-16			g25262	1.71332	1.10242e-44
	g34303	-2.16396	6.40374e-79								g59498	1.02263	1.12399e-32			g38044	-1.53823	1.26979e-280			g9926	1.01431	4.75701e-12			g25400	1.71135	2.38143e-27
	g10024	-2.16442	1.96311e-196								g21475	1.02232	1.41697e-33			g20676	-1.53965	7.95242e-231			g60222	1.01421	2.37105e-41			g8984	1.71022	2.35947e-18
	g59483	-2.16627	1.44349e-97								g29017	1.02213	4.64697e-65			g1477	-1.54722	1.04939e-92			g43899	1.01404	2.99877e-17			g10466	1.70787	5.1799e-79
	g41866	-2.1664	2.8802e-55								g42526	1.02193	1.91669e-77			g29906	-1.5477	9.97532e-279			g28993	1.01124	2.26563e-44			g758	1.70738	1.11256e-20
	g55107	-2.16641	4.36816e-62								g865	1.02151	3.24573e-106			g54876	-1.54781	2.68066e-274			g13120	1.00918	3.03711e-21			g38443	1.70695	1.01719e-36
	g10039	-2.16902	6.69397e-223								g42476	1.01989	1.43658e-27			g47107	-1.55397	5.05835e-67			g20603	1.008	1.13549e-29			g6134	1.70499	3.47959e-24
	g36402	-2.17113	1.05528e-58								g46494	1.0182	7.38826e-276			g17456	-1.55425	1.84702e-263			g34703	1.00792	3.39978e-25			g55655	1.70263	9.57995e-23
	g58139	-2.17425	1.47151e-104								g38849	1.01583	5.7029e-34			g37262	-1.55641	9.17533e-105			g47162	1.00724	9.29241e-69			g35606	1.70199	3.19191e-28
	g6094	-2.17532	6.9019e-60								g9904	1.01465	1.10707e-159			g5555	-1.55892	6.90194e-69			g9455	1.00533	6.87459e-42			g13686	1.70151	4.48106e-35
	g4784	-2.17731	2.69801e-107								g43136	1.01367	5.83215e-60			g38835	-1.56366	6.97139e-80			g9515	1.00353	9.72123e-14			g42771	1.70115	4.86601e-63
	g517	-2.17849	7.90545e-98								g60506	1.01324	5.51719e-71			g34448	-1.56389	3.27244e-133			g31326	1.00333	5.64977e-17			g5757	1.70098	4.59358e-50
	g44493	-2.18041	1.24723e-63								g23950	1.01086	3.36429e-25			g20008	-1.57189	5.84161e-52			g8285	1.00293	3.27003e-27			g1823	1.69952	5.07177e-18
	g53665	-2.18202	3.54911e-49								g35438	1.00694	2.45597e-59			g5155	-1.57256	9.16586e-89			g25097	1.00264	1.23283e-12			g34017	1.6979	2.13308e-88
	g47203	-2.188	4.01714e-115								g4683	1.00245	1.10472e-28			g13238	-1.57744	2.17983e-213			g41199	1.00096	5.00548e-20			g34519	1.69732	1.00023e-28
	g15915	-2.19358	1.51405e-70								g26514	-1.00159	2.5324e-119			g60543	-1.58021	5.80213e-149			g54898	1	6.88363e-32			g4994	1.69147	1.00067e-23
	g60923	-2.19704	2.83499e-66								g8956	-1.00364	3.84072e-242			g54957	-1.58306	1.132e-69			g3888	1	1.14725e-47			g55686	1.69138	2.856e-21
	g54850	-2.20588	2.5697e-108								g18111	-1.00375	7.20423e-35			g43328	-1.58424	8.66901e-69			g13482	1	1.48165e-34			g1128	1.68917	1.08077e-35
	g5556	-2.20752	1.85061e-65								g1573	-1.00444	2.48752e-111			g38107	-1.58699	9.3756e-169			g16942	-1.00166	3.38845e-26			g8285	1.68803	3.69623e-43
	g31379	-2.21399	4.22775e-122								g9285	-1.00479	2.61746e-28			g12836	-1.58892	4.51768e-94			g12212	-1.00264	2.96729e-17			g1058	1.68764	5.76206e-26
	g43039	-2.22134	2.6515e-48								g24795	-1.00616	3.71518e-30			g10238	-1.59233	1.76069e-119			g20510	-1.00415	4.51047e-99			g29133	1.68623	6.95973e-25
	g47637	-2.22597	4.78879e-88								g11925	-1.01091	7.69556e-109			g12263	-1.59738	0			g31251	-1.00704	4.14852e-106			g2049	1.68541	2.60266e-40
	g10666	-2.23146	1.9715e-103								g25656	-1.01237	7.71932e-180			g50100	-1.59808	3.05733e-242			g40754	-1.0098	1.47274e-22			g31111	1.68535	4.21753e-33
	g28945	-2.23737	8.98512e-73								g27267	-1.01409	2.14008e-157			g10265	-1.60029	1.03166e-107			g13529	-1.0099	1.89129e-48			g25700	1.68534	1.45934e-39
	g20828	-2.23787	3.24257e-56								g55112	-1.01517	4.09667e-90			g60176	-1.60556	8.46951e-39			g34320	-1.01215	6.94684e-42			g49986	1.68484	8.68336e-56
	g51198	-2.23891	3.95095e-66								g30929	-1.01609	3.24618e-79			g45063	-1.60793	1.3873e-118			g30929	-1.01392	1.30264e-39			g30046	1.68341	3.16144e-37
	g58896	-2.24045	2.79311e-53								g12263	-1.01693	7.01574e-162			g38350	-1.61144	2.97456e-213			g233	-1.01489	8.79751e-30			g9880	1.68135	3.5454e-41
	g34703	-2.24836	8.59458e-81								g34136	-1.01724	1.83451e-191			g23972	-1.61289	6.83172e-70			g26050	-1.01711	1.96961e-35			g59388	1.67941	2.04701e-30
	g58895	-2.24948	1.31213e-71								g45616	-1.01775	1.23932e-31			g42725	-1.61496	9.4267e-126			g34266	-1.01723	3.30157e-40			g26392	1.6758	1.85306e-19
	g34802	-2.25351	2.06245e-145								g41746	-1.01842	1.2398e-120			g58762	-1.61849	1.13566e-89			g9706	-1.01977	2.05057e-118			g36405	1.67543	2.3469e-23
	g31126	-2.25532	5.16613e-56								g14520	-1.01902	9.62208e-76			g31453	-1.62002	0			g30328	-1.02065	7.70481e-09			g9251	1.66801	1.46182e-60
	g16990	-2.25597	5.79602e-67								g50362	-1.01941	3.41417e-181			g17392	-1.62586	2.55551e-95			g22408	-1.02144	3.34013e-30			g29785	1.66712	2.51197e-25
	g2267	-2.25646	2.6781e-181								g59670	-1.01948	2.24067e-51			g33780	-1.63147	2.33679e-101			g19855	-1.02696	3.93459e-57			g841	1.66648	2.07662e-65
	g54815	-2.25728	1.73227e-39								g51258	-1.02071	4.48991e-27			g51258	-1.63211	1.31984e-50			g21675	-1.02731	9.61711e-17			g29609	1.66647	4.32411e-42
	g1904	-2.25729	4.39591e-46								g23442	-1.02145	7.80184e-84			g31396	-1.63732	4.80512e-291			g1044	-1.0321	1.18921e-77			g7717	1.66144	1.12039e-37
	g1093	-2.2623	3.5342e-147								g35477	-1.02608	5.67696e-63			g25019	-1.64323	4.22864e-65			g15906	-1.03861	3.221e-73			g59019	1.66112	1.67616e-20
	g184	-2.26425	2.25242e-139								g26047	-1.02625	2.40343e-65			g60747	-1.64511	8.94518e-74			g4484	-1.03927	3.30532e-85			g51779	1.65818	4.01411e-28
	g24049	-2.26463	4.70311e-67								g47256	-1.02629	3.09145e-33			g31189	-1.65179	2.34337e-235			g49304	-1.04231	2.36505e-10			g38111	1.65771	1.9227e-35
	g43231	-2.26545	1.75292e-125								g42544	-1.02711	8.42408e-45			g13298	-1.65726	3.33453e-76			g1328	-1.04312	1.10973e-19			g58584	1.65481	2.79382e-24
	g5655	-2.2686	4.53542e-54								g25001	-1.02888	8.52635e-35			g47077	-1.65884	5.95389e-181			g20289	-1.04363	1.68278e-35			g46336	1.65322	1.54638e-36
	g10078	-2.26932	8.77152e-133								g8934	-1.02933	1.63256e-47			g63907	-1.65897	1.69974e-186			g59800	-1.05125	2.7504e-12			g59226	1.6527	1.07857e-70
	g13640	-2.27286	2.34631e-58								g50542	-1.0367	1.89312e-177			g29378	-1.65924	4.66465e-110			g59753	-1.05181	2.82623e-123			g25109	1.65264	3.59944e-18
	g35209	-2.27583	1.21094e-49								g14103	-1.03784	2.5529e-125			g58903	-1.66362	3.84878e-128			g7749	-1.05469	2.0156e-17			g12527	1.65238	1.64865e-14
	g41820	-2.27897	1.53243e-62								g4731	-1.04096	4.53196e-52			g14255	-1.6678	1.40573e-90			g11735	-1.05687	2.33467e-85			g20645	1.65166	4.56213e-22
	g59115	-2.28157	9.77491e-93								g12975	-1.04248	7.11821e-50			g5498	-1.66804	3.74603e-64			g20781	-1.05781	7.79181e-29			g18071	1.65015	1.4465e-17
	g42383	-2.28271	4.98355e-76								g20229	-1.04255	1.27171e-29			g8787	-1.66985	4.0611e-81			g35829	-1.05844	8.91906e-114			g26745	1.64891	1.44298e-67
	g49876	-2.28394	2.11646e-88								g61184	-1.04383	4.05588e-70			g54350	-1.67133	0			g1039	-1.06114	2.51124e-109			g33872	1.64836	4.16806e-38
	g16447	-2.28649	1.986e-158								g25076	-1.04553	4.30652e-42			g54885	-1.67814	7.41951e-177			g12376	-1.06163	3.94964e-20			g2425	1.64731	1.32306e-24
	g29076	-2.28708	3.09035e-65								g50247	-1.04554	2.80246e-54			g16715	-1.67996	3.31926e-288			g26514	-1.06503	6.58209e-86			g5100	1.64256	1.69561e-31
	g60135	-2.29654	3.19979e-158								g52522	-1.04843	4.98666e-103			g8923	-1.68074	1.56726e-169			g25117	-1.06941	3.82646e-78			g58284	1.64233	2.73754e-44
	g10102	-2.30111	7.98071e-185								g35034	-1.04848	1.80452e-157			g20847	-1.68093	4.38602e-104			g59521	-1.07051	2.91747e-39			g42786	1.64091	1.22815e-34
	g22508	-2.30522	2.68035e-47								g30366	-1.05227	1.54398e-52			g34209	-1.6837	5.83568e-118			g42994	-1.07237	3.17318e-48			g48088	1.63991	1.6682e-84
	g42339	-2.30634	8.81584e-160								g11901	-1.05243	3.0794e-176			g24348	-1.68524	2.34628e-38			g3990	-1.07456	1.53259e-40			g24570	1.63874	6.31831e-31
	g61402	-2.30966	1.52543e-49								g38741	-1.05313	1.63499e-32			g58198	-1.68902	1.21378e-53			g52522	-1.07486	6.55786e-74			g30077	1.63777	1.62703e-20
	g29964	-2.312	6.65502e-85								g20008	-1.05539	1.82371e-31			g29334	-1.68921	1.41477e-104			g20229	-1.07882	1.4638e-21			g46670	1.63678	3.37944e-16
	g23265	-2.31266	3.11197e-54								g16904	-1.05641	2.06917e-149			g26453	-1.69094	6.94399e-59			g20336	-1.08022	5.34471e-30			g9515	1.63453	6.35149e-37
	g12152	-2.31278	1.34818e-167								g20289	-1.05711	3.61028e-49			g31148	-1.69247	5.67699e-89			g38036	-1.08226	1.71159e-60			g41794	1.63352	3.04806e-26
	g58844	-2.31656	4.03376e-66								g47077	-1.05764	1.41299e-100			g64097	-1.69443	2.84539e-273			g42746	-1.08345	1.2625e-30			g60443	1.63234	1.1365e-44
	g35310	-2.31809	7.07193e-79								g34266	-1.05829	8.33782e-66			g30695	-1.69552	5.73778e-161			g25395	-1.08527	1.45025e-30			g27717	1.63232	1.08802e-22
	g30581	-2.31866	9.61566e-110								g24291	-1.06035	3.09363e-25			g24960	-1.70209	1.66892e-169			g50353	-1.0859	1.50896e-149			g8747	1.63217	1.36375e-59
	g30333	-2.32026	1.41751e-150								g13992	-1.06403	9.94949e-41			g25257	-1.70242	1.05101e-260			g42145	-1.08842	1.79958e-33			g30448	1.6303	1.50766e-48
	g61193	-2.3273	6.79109e-118								g2036	-1.06404	9.31228e-173			g53015	-1.70321	1.62699e-91			g43952	-1.09024	5.73224e-25			g43021	1.63015	3.04313e-14
	g54746	-2.33381	5.58672e-67								g58177	-1.06671	5.68877e-118			g2433	-1.70682	1.09883e-145			g8995	-1.0915	1.85242e-21			g42314	1.62944	1.497e-29
	g59458	-2.33631	5.36862e-58								g1436	-1.06731	2.36513e-49			g56269	-1.71424	3.8963e-122			g35135	-1.10189	2.30394e-44			g30112	1.62475	1.0714e-17
	g16865	-2.33908	1.41084e-78								g11523	-1.06751	6.75081e-57			g49608	-1.71548	7.88292e-162			g30524	-1.10417	6.72988e-105			g27232	1.62445	2.94843e-19
	g54898	-2.34406	6.89891e-84								g59774	-1.0709	8.24052e-32			g23818	-1.71703	1.66106e-133			g21484	-1.10559	1.17718e-28			g30340	1.62007	9.05222e-19
	g42080	-2.3447	2.14246e-58								g26660	-1.07186	1.38025e-88			g54791	-1.71925	3.77249e-97			g61505	-1.10681	5.3557e-106			g21453	1.61895	1.28572e-78
	g25621	-2.34705	2.34151e-77								g3609	-1.074	3.04562e-251			g873	-1.72183	2.70108e-227			g59698	-1.1083	2.43565e-26			g3888	1.61753	2.06324e-52
	g30521	-2.36453	6.21883e-55								g59969	-1.07718	7.07268e-65			g55040	-1.7225	0			g25252	-1.10861	7.36731e-22			g37181	1.6154	6.80719e-64
	g30833	-2.36469	1.46214e-62								g13529	-1.07872	3.18487e-78			g9194	-1.72262	0			g51362	-1.11379	1.34376e-51			g55870	1.6137	2.12406e-18
	g10997	-2.36636	9.2108e-112								g59882	-1.07922	8.28778e-65			g4477	-1.72544	1.09773e-107			g20406	-1.11437	4.15162e-71			g17091	1.61249	4.36532e-39
	g25701	-2.36714	2.75466e-72								g3831	-1.07944	8.62958e-145			g26780	-1.72808	5.79984e-101			g11335	-1.11602	6.06669e-51			g39860	1.60842	4.32505e-29
	g56456	-2.3699	6.75515e-52								g4484	-1.08105	9.32822e-142			g4294	-1.72869	4.96611e-204			g1269	-1.11736	4.95643e-161			g51287	1.6077	1.38982e-09
	g46297	-2.37217	1.69648e-113								g30458	-1.08151	5.22735e-175			g58517	-1.72928	2.80657e-65			g41998	-1.12006	1.08738e-23			g49923	1.60475	6.01378e-38
	g827	-2.37836	1.16745e-126								g43575	-1.08297	4.82554e-60			g20702	-1.7303	9.94328e-89			g29907	-1.12043	1.37335e-24			g26026	1.6015	5.40424e-24
	g60230	-2.38728	6.70055e-88								g59443	-1.08315	9.39024e-210			g49936	-1.73236	4.72839e-279			g63677	-1.12136	1.2567e-29			g59048	1.60046	1.54713e-47
	g42502	-2.38741	1.20906e-273								g60586	-1.08584	1.73417e-54			g34019	-1.73423	3.39195e-173			g23440	-1.12365	1.00241e-107			g30834	1.60003	1.12147e-27
	g60221	-2.38911	6.20001e-136								g47150	-1.08798	1.48403e-210			g381	-1.73543	3.27511e-65			g47269	-1.12461	2.09629e-63			g43560	1.59856	1.04711e-16
	g8747	-2.38934	7.27236e-76								g34101	-1.08882	3.01996e-30			g9529	-1.73857	2.18519e-82			g56247	-1.12501	9.4296e-43			g9357	1.59833	2.10788e-36
	g9401	-2.39148	5.2013e-74								g1039	-1.09074	9.78818e-185			g13792	-1.73928	5.05207e-115			g5120	-1.13021	5.33962e-80			g54704	1.59723	1.86353e-24
	g30487	-2.39287	1.83278e-261								g51362	-1.09174	9.48024e-75			g43148	-1.74468	2.11182e-79			g61980	-1.13251	1.80299e-85			g48560	1.59623	1.67377e-21
	g41861	-2.40126	3.94098e-62								g47334	-1.09308	3.19396e-70			g35192	-1.74615	3.59884e-160			g27321	-1.13447	3.50481e-42			g43065	1.5948	1.07079e-19
	g7797	-2.4097	1.1117e-90								g10474	-1.09407	4.18369e-187			g24978	-1.74643	2.26453e-83			g52891	-1.1374	6.03505e-82			g55154	1.59315	1.21206e-30
	g54953	-2.41535	4.68377e-48								g15098	-1.09464	1.72685e-31			g24884	-1.7471	7.00773e-60			g34007	-1.13792	2.17161e-91			g58668	1.58985	7.38946e-16
	g25622	-2.41932	4.27248e-72								g33490	-1.09663	2.68957e-72			g24713	-1.74857	6.53788e-73			g11523	-1.14011	4.20688e-31			g55107	1.58796	3.15785e-45
	g43900	-2.43126	3.25175e-152								g5120	-1.10045	5.17702e-116			g47776	-1.74899	5.838e-98			g42544	-1.14012	1.07689e-30			g59768	1.58605	8.44854e-20
	g24319	-2.43172	8.34449e-60								g43896	-1.10318	2.38294e-139			g10197	-1.75284	7.93262e-68			g12268	-1.14066	1.80731e-40			g47733	1.58534	3.06103e-36
	g50526	-2.43319	9.34325e-51								g19855	-1.10567	1.60445e-95			g1548	-1.75494	2.09181e-55			g34974	-1.14391	8.18642e-35			g59242	1.58516	1.52583e-20
	g14100	-2.43698	2.72488e-171								g55715	-1.10687	1.04763e-34			g42315	-1.76296	1.38353e-153			g20819	-1.14731	4.39623e-87			g23509	1.58497	1.87264e-50
	g30139	-2.43892	3.82517e-61								g11311	-1.10927	4.13395e-70			g34101	-1.76519	1.27311e-87			g8758	-1.14823	2.06843e-133			g55028	1.58357	1.11011e-46
	g46494	-2.44676	3.02261e-261								g58836	-1.11481	2.05735e-87			g497	-1.76563	1.63558e-152			g48994	-1.1485	6.7822e-89			g60068	1.58195	5.71795e-21
	g13908	-2.44778	1.46385e-55								g31453	-1.11597	7.36124e-171			g25157	-1.76924	3.9166e-283			g5378	-1.14956	8.93741e-138			g59975	1.57953	5.76561e-37
	g35826	-2.45395	2.24659e-115								g12212	-1.11608	2.24772e-31			g20715	-1.77024	6.13729e-293			g19670	-1.15365	4.98287e-29			g9387	1.5786	4.05657e-52
	g4951	-2.45802	1.98752e-130								g9476	-1.11697	4.28987e-92			g357	-1.7724	3.38234e-147			g51669	-1.15929	8.6199e-117			g60716	1.57795	4.19915e-26
	g10924	-2.46254	3.36857e-60								g25117	-1.11741	2.59896e-130			g57028	-1.7752	2.79319e-72			g4285	-1.16085	3.68388e-26			g46257	1.57793	3.70917e-32
	g37622	-2.47087	5.63957e-86								g34974	-1.11761	7.8929e-55			g29087	-1.77685	4.12418e-96			g46358	-1.16101	3.16575e-20			g13561	1.57516	1.66759e-22
	g26079	-2.4749	5.31883e-94								g13073	-1.11777	5.1584e-47			g16688	-1.77866	1.00096e-286			g5114	-1.16218	2.57605e-76			g26149	1.57323	6.50419e-51
	g24541	-2.4796	7.77599e-221								g9263	-1.12054	2.96192e-91			g52957	-1.78539	1.03522e-62			g12851	-1.16592	2.37232e-30			g17154	1.57099	5.62194e-39
	g34183	-2.47999	4.47366e-269								g50566	-1.12293	7.98263e-105			g55787	-1.78544	1.54253e-80			g34566	-1.17134	2.42294e-30			g42391	1.56946	8.30696e-15
	g58342	-2.4822	2.92439e-115								g30524	-1.12433	9.37689e-171			g20723	-1.78846	1.0562e-245			g31678	-1.17987	6.03254e-92			g60616	1.56788	4.55887e-32
	g6081	-2.48308	3.86358e-97								g16908	-1.12441	6.85039e-124			g20638	-1.78907	2.2648e-177			g29968	-1.18435	3.67817e-70			g54287	1.56293	6.13773e-26
	g59147	-2.4873	1.50202e-240								g15906	-1.12609	1.40438e-132			g8476	-1.79074	1.73506e-138			g5281	-1.18467	2.31572e-111			g58509	1.56184	6.40393e-34
	g55227	-2.48945	6.67234e-145								g1328	-1.12769	1.21394e-45			g42779	-1.79307	3.09143e-113			g13992	-1.18693	6.44535e-33			g55874	1.56112	2.59855e-32
	g24871	-2.4931	1.23204e-138								g55302	-1.13045	1.55785e-156			g13592	-1.79625	1.13527e-302			g56359	-1.18774	9.65821e-37			g4559	1.55958	6.21363e-35
	g34175	-2.4935	7.83077e-94								g5190	-1.13273	2.78809e-185			g31384	-1.79704	3.03419e-152			g35340	-1.19503	2.89164e-20			g21903	1.55823	5.35498e-20
	g20025	-2.49386	1.09642e-83								g50353	-1.14248	8.98975e-273			g9137	-1.79767	2.2462e-81			g43575	-1.19609	1.41535e-42			g37069	1.55616	4.12435e-23
	g840	-2.49519	3.78834e-62								g21510	-1.1469	9.74211e-38			g34109	-1.79898	7.73201e-74			g10974	-1.19854	7.83506e-35			g13548	1.5532	6.20504e-37
	g60392	-2.50361	4.56954e-73								g55247	-1.14784	7.51796e-109			g35290	-1.80054	7.96937e-166			g34221	-1.205	7.82163e-110			g21429	1.54976	9.11039e-43
	g20448	-2.50378	3.90396e-139								g1608	-1.14791	4.24367e-247			g8698	-1.80059	7.6327e-68			g179	-1.2061	7.47877e-50			g27212	1.54736	4.30256e-25
	g42819	-2.51427	1.06251e-62								g976	-1.14796	1.47216e-138			g9078	-1.8006	4.51386e-280			g976	-1.21015	1.80103e-97			g337	1.54716	4.90457e-18
	g4419	-2.51546	1.18774e-76								g38036	-1.14928	1.67868e-102			g60513	-1.80538	1.71298e-98			g55715	-1.21237	5.84515e-24			g25916	1.54599	4.26617e-22
	g4904	-2.51597	9.85291e-62								g34205	-1.14945	2.22296e-49			g54710	-1.80557	8.61386e-76			g34162	-1.22049	1.99626e-45			g9509	1.54333	1.81326e-17
	g20410	-2.52071	4.61192e-79								g55157	-1.15196	1.79073e-186			g60863	-1.80651	9.29828e-119			g36554	-1.22129	1.92978e-63			g60821	1.54307	9.90741e-38
	g47681	-2.52158	1.24701e-81								g42145	-1.15222	3.66922e-55			g34782	-1.80796	6.28103e-78			g14672	-1.22349	1.06538e-68			g1319	1.54259	6.40272e-44
	g58708	-2.53168	6.97652e-70								g12509	-1.15249	6.02372e-40			g33582	-1.80817	4.01e-141			g23936	-1.22773	4.77814e-34			g4464	1.53748	0.000186848
	g61078	-2.53172	3.52281e-80								g54002	-1.15547	9.43869e-248			g39208	-1.80868	2.51939e-263			g12354	-1.23263	1.94978e-23			g54696	1.53562	1.88946e-11
	g31704	-2.53316	1.74402e-143								g23982	-1.15581	1.72804e-60			g61048	-1.80897	2.97409e-110			g5092	-1.23382	7.23087e-100			g16692	1.53491	4.85238e-28
	g54255	-2.53545	1.74625e-105								g42994	-1.15618	7.00069e-89			g33573	-1.8095	1.02092e-238			g5551	-1.23409	2.34537e-56			g34961	1.5331	1.47772e-30
	g26747	-2.53978	8.377e-94								g25580	-1.15672	4.69274e-45			g53064	-1.8148	3.70495e-74			g38710	-1.23919	9.67888e-37			g59326	1.53264	9.35607e-23
	g40777	-2.54644	4.10597e-77								g30000	-1.15701	5.25464e-149			g27905	-1.81628	1.06189e-65			g58343	-1.24164	4.20348e-24			g61573	1.53139	2.4352e-17
	g34420	-2.54837	7.41683e-234								g38646	-1.15748	1.64627e-83			g10452	-1.81861	6.15287e-189			g58362	-1.24365	3.33908e-116			g3685	1.52925	6.77727e-31
	g61121	-2.55078	1.13115e-175								g13932	-1.15959	6.99063e-197			g1852	-1.82154	4.85142e-65			g50532	-1.24604	5.57008e-56			g173	1.52832	5.60571e-50
	g38193	-2.55727	1.57412e-121								g26999	-1.16286	6.33983e-92			g38683	-1.82312	2.56873e-190			g1436	-1.24871	1.65104e-36			g24212	1.52383	6.63701e-28
	g50412	-2.55768	2.04342e-104								g11335	-1.16296	1.6314e-81			g60720	-1.82429	1.30884e-92			g35205	-1.24899	9.09732e-29			g34120	1.52342	1.66773e-19
	g379	-2.55836	5.69465e-102								g49432	-1.16557	8.15598e-41			g25907	-1.82591	4.11622e-53			g39213	-1.24983	3.94709e-73			g17371	1.5229	7.71847e-29
	g42661	-2.58891	1.40633e-61								g23468	-1.16623	1.11306e-51			g13303	-1.83099	7.53558e-147			g13931	-1.2516	8.29221e-110			g23756	1.52118	1.27428e-47
	g14285	-2.59757	6.37683e-53								g54136	-1.16755	1.62005e-119			g13403	-1.83368	4.88975e-181			g20008	-1.25467	6.23083e-24			g8622	1.51952	1.40813e-10
	g54846	-2.59868	3.20352e-93								g20374	-1.16841	1.52144e-29			g9018	-1.83611	5.65582e-189			g2187	-1.25999	9.67086e-22			g59742	1.51894	9.14796e-13
	g46847	-2.60141	4.13581e-75								g34320	-1.16943	1.0055e-79			g25064	-1.83878	1.03425e-195			g525	-1.2638	7.75282e-53			g46717	1.51729	7.58999e-33
	g155	-2.60254	3.95621e-126								g47774	-1.17035	9.00729e-36			g25698	-1.84038	4.87744e-100			g9403	-1.26682	3.03083e-139			g34428	1.51616	3.04494e-28
	g29779	-2.60705	4.03764e-77								g6113	-1.17182	4.57219e-136			g14521	-1.8426	5.71775e-71			g42425	-1.26898	3.69754e-22			g54654	1.51595	3.67363e-29
	g23686	-2.60722	1.45974e-67								g46301	-1.17249	4.2353e-44			g50511	-1.84671	2.66895e-158			g34361	-1.26909	2.47054e-29			g41652	1.51575	9.99387e-17
	g49880	-2.61115	1.41768e-114								g4438	-1.17403	9.67713e-273			g59505	-1.84754	5.55211e-267			g25580	-1.27333	2.01506e-33			g51050	1.51471	2.12773e-65
	g4931	-2.62605	8.82636e-107								g43656	-1.17435	1.11901e-35			g47461	-1.84868	3.30026e-192			g50247	-1.27521	2.49733e-40			g38351	1.51466	5.85677e-24
	g42076	-2.62996	9.07555e-76								g25000	-1.1758	1.20075e-224			g9077	-1.84875	6.37823e-87			g41746	-1.27525	3.05487e-113			g9725	1.51295	9.29825e-15
	g12012	-2.63189	3.63411e-164								g41998	-1.17727	2.34301e-38			g24793	-1.85438	3.53379e-148			g31823	-1.28045	5.2728e-124			g54430	1.51085	7.1176e-34
	g59749	-2.64122	7.71737e-57								g10185	-1.17866	1.30894e-132			g61056	-1.85924	1.24474e-79			g54081	-1.28486	4.34562e-38			g43136	1.50934	2.22375e-53
	g26627	-2.64578	2.02895e-83								g34109	-1.17959	1.1915e-36			g17223	-1.86154	2.67761e-109			g57784	-1.29236	6.20235e-26			g28394	1.50906	3.76782e-17
	g30167	-2.65101	3.54288e-51								g10329	-1.1815	1.40487e-155			g3967	-1.86413	0			g51120	-1.29353	9.2319e-72			g12823	1.50851	3.2012e-18
	g3436	-2.65246	1.35661e-128								g5194	-1.18356	3.94292e-224			g27011	-1.86437	1.12908e-96			g4987	-1.29415	1.00733e-27			g39022	1.50754	3.83998e-57
	g17891	-2.66064	9.61357e-130								g23936	-1.18396	7.26244e-45			g54897	-1.86482	1.01172e-109			g60176	-1.29415	4.35865e-16			g9070	1.50716	1.40111e-33
	g43136	-2.66167	5.17836e-77								g50331	-1.18433	4.63611e-74			g20623	-1.86836	1.03956e-145			g30123	-1.29451	1.07459e-57			g55026	1.50562	1.35707e-13
	g58905	-2.66484	4.27009e-111								g48978	-1.18556	2.98141e-190			g60764	-1.87046	5.75351e-53			g54315	-1.29599	4.49174e-36			g34726	1.50346	1.89489e-30
	g59652	-2.67174	2.72996e-76								g44972	-1.18585	1.31803e-265			g10027	-1.87515	1.96537e-270			g25677	-1.29899	2.2934e-37			g47124	1.50035	1.80165e-39
	g41105	-2.6732	2.95212e-88								g233	-1.1868	1.87608e-49			g42729	-1.87593	4.93705e-102			g51258	-1.30119	8.15591e-24			g9636	1.49717	1.69918e-45
	g35092	-2.68177	1.02491e-78								g8240	-1.18752	2.62595e-79			g24312	-1.87878	0			g38185	-1.30667	2.45195e-35			g43210	1.49603	3.15321e-58
	g60700	-2.69026	2.27587e-136								g55098	-1.1876	2.77098e-67			g3683	-1.88143	2.1946e-127			g14843	-1.30777	6.95603e-41			g6479	1.49279	2.67502e-21
	g33592	-2.69827	1.25475e-133								g58060	-1.18974	8.97859e-242			g43049	-1.88526	1.7794e-107			g12785	-1.30934	9.63009e-30			g24788	1.49173	3.1527e-26
	g43972	-2.69982	1.54962e-62								g52891	-1.19242	2.08638e-144			g58990	-1.88555	1.24955e-107			g47774	-1.31094	2.51796e-29			g50302	1.49064	1.75579e-48
	g9996	-2.71158	1.60445e-88								g11431	-1.19499	8.23255e-113			g21576	-1.8877	6.17344e-145			g12509	-1.31264	4.08968e-37			g50825	1.49009	3.51483e-16
	g20355	-2.71436	2.22341e-179								g12074	-1.1965	3.84139e-40			g58915	-1.88822	1.46505e-60			g13650	-1.31455	1.14432e-69			g43184	1.48741	3.50189e-16
	g25710	-2.71475	5.48652e-199								g12814	-1.19696	1.06364e-38			g9641	-1.88942	1.38804e-119			g42823	-1.3152	4.00225e-84			g1096	1.48549	1.09628e-21
	g60019	-2.718	1.23032e-94								g54126	-1.19726	2.22769e-66			g23055	-1.88987	4.51048e-135			g15866	-1.31671	4.83931e-50			g59498	1.48516	8.0472e-24
	g29785	-2.72328	2.28366e-63								g47269	-1.20797	7.11323e-108			g21517	-1.89224	4.11422e-88			g29616	-1.3177	8.12189e-82			g46625	1.48419	1.47916e-13
	g34275	-2.72391	7.19152e-94								g29299	-1.20872	1.7086e-152			g4287	-1.89817	5.66702e-225			g1548	-1.32313	2.43377e-25			g24869	1.48208	2.48564e-26
	g46355	-2.72659	4.91936e-179								g53832	-1.21016	5.26808e-208			g20458	-1.89835	8.46582e-257			g46564	-1.32394	2.86907e-143			g54744	1.4808	5.74397e-24
	g25789	-2.72684	4.72119e-182								g29968	-1.21207	1.44077e-116			g54397	-1.90379	0			g34477	-1.32901	3.64444e-30			g55886	1.4806	1.5077e-26
	g17271	-2.72896	1.65108e-91								g35829	-1.21639	6.31945e-231			g1634	-1.90703	1.00985e-68			g11485	-1.34022	8.50119e-82			g3384	1.47984	1.03671e-13
	g46388	-2.74496	3.64957e-74								g51022	-1.21945	3.59305e-81			g15620	-1.9092	6.74682e-68			g23476	-1.34157	3.9833e-33			g63124	1.47764	3.80987e-32
	g42771	-2.74897	0								g20236	-1.22	4.75901e-216			g8831	-1.91391	2.14605e-67			g34430	-1.34211	1.08734e-42			g46702	1.47667	9.17615e-28
	g55665	-2.75521	2.75826e-97								g8265	-1.22166	3.51643e-30			g55675	-1.91675	0			g43656	-1.34271	2.94479e-24			g57381	1.47638	2.27951e-36
	g51374	-2.7573	5.42699e-133								g51445	-1.22368	4.43035e-72			g48811	-1.92765	1.40008e-262			g12828	-1.34434	5.05431e-26			g24663	1.47577	3.97482e-60
	g63719	-2.75995	2.22071e-58								g60176	-1.22419	2.43068e-21			g33489	-1.93022	0			g23468	-1.34549	5.8576e-36			g30111	1.47522	1.9424e-23
	g21485	-2.76652	1.19329e-175								g1275	-1.22726	8.90179e-38			g38959	-1.9351	3.65565e-296			g50100	-1.34807	3.81874e-117			g9343	1.47079	3.09609e-16
	g54376	-2.78385	5.01926e-77								g35205	-1.2278	1.99848e-40			g55622	-1.93521	1.86478e-233			g26854	-1.35075	2.59926e-27			g12495	1.47078	4.47058e-45
	g50408	-2.79621	1.62833e-187								g19670	-1.23142	1.51548e-52			g57671	-1.93865	4.14519e-116			g4551	-1.35086	2.36449e-42			g40877	1.47045	2.0217e-74
	g57577	-2.79889	1.59575e-163								g59468	-1.23548	6.89344e-67			g19690	-1.94107	5.27711e-134			g19709	-1.3526	1.60051e-71			g50612	1.47009	4.56671e-33
	g60530	-2.80121	1.58718e-188								g43952	-1.23682	6.70441e-36			g867	-1.94463	9.65458e-263			g9360	-1.35344	5.05576e-55			g38344	1.46848	3.55175e-26
	g48462	-2.80153	5.73299e-63								g25395	-1.23703	2.85636e-43			g43685	-1.94651	1.94866e-66			g59468	-1.35391	5.95645e-45			g24811	1.46517	1.54465e-47
	g29437	-2.8039	1.84617e-175								g22408	-1.23998	9.527e-61			g5577	-1.94703	2.24334e-113			g25355	-1.35536	1.40234e-54			g50236	1.46474	5.48457e-21
	g55284	-2.80714	1.90556e-64								g966	-1.24014	7.20064e-45			g13183	-1.94812	2.04897e-93			g47	-1.35976	4.57786e-32			g30658	1.46347	2.85582e-52
	g9816	-2.8103	1.17213e-29								g23414	-1.24163	9.99165e-213			g26017	-1.9494	4.536e-23			g20278	-1.36571	1.57398e-127			g37926	1.4632	1.3996e-28
	g9776	-2.82354	5.90806e-127								g31251	-1.24289	2.30683e-221			g32106	-1.95047	0			g26999	-1.36599	4.22934e-70			g34439	1.46308	2.93083e-29
	g40834	-2.82461	1.41069e-131								g54081	-1.24705	2.6017e-57			g59648	-1.95066	0			g55098	-1.36659	2.80291e-43			g3303	1.46236	8.9215e-30
	g59514	-2.83024	4.11756e-102								g24776	-1.25306	2.47621e-78			g38646	-1.95295	3.2127e-166			g30585	-1.36864	1.00396e-34			g18081	1.46181	6.85329e-31
	g57652	-2.83434	3.53636e-76								g5114	-1.25336	1.37436e-129			g11866	-1.95501	0			g219	-1.37346	1.06416e-113			g42819	1.46115	8.22448e-23
	g24627	-2.83592	8.22601e-226								g59753	-1.25976	3.54471e-258			g765	-1.95812	2.77711e-87			g20467	-1.37489	5.49372e-69			g12124	1.46034	1.99551e-29
	g17980	-2.8386	5.24947e-77								g9360	-1.26256	4.00144e-72			g3987	-1.95974	5.71855e-251			g43041	-1.37949	7.38621e-28			g26913	1.45949	9.62248e-22
	g34781	-2.8452	6.20527e-79								g11485	-1.26577	2.86729e-108			g16295	-1.9603	8.11827e-166			g29299	-1.38535	2.70369e-114			g25408	1.45887	1.7846e-22
	g1474	-2.84596	2.13611e-86								g219	-1.26683	2.21692e-164			g32564	-1.9621	3.30048e-92			g26047	-1.38563	3.32685e-61			g37862	1.45776	2.72399e-18
	g43457	-2.84791	3.39054e-189								g19709	-1.26731	7.40717e-104			g30155	-1.96388	8.25921e-269			g25077	-1.39269	1.71055e-44			g50823	1.45713	2.24422e-17
	g9070	-2.85297	4.70357e-77								g26886	-1.2678	2.63215e-43			g17905	-1.96752	1.55732e-250			g43297	-1.39339	4.27716e-85			g13544	1.45685	1.32377e-52
	g26717	-2.8634	1.98407e-72								g39398	-1.26912	6.4152e-103			g1705	-1.97288	3.52894e-82			g26886	-1.39371	7.31602e-26			g19173	1.45402	2.79776e-14
	g50222	-2.87231	6.19754e-133								g16744	-1.27572	2.75032e-60			g54751	-1.97301	6.5571e-110			g9717	-1.39378	4.49363e-20			g55036	1.45377	8.72046e-52
	g5261	-2.88567	2.55998e-74								g1044	-1.27604	1.23524e-173			g15497	-1.97537	1.52364e-74			g53745	-1.40322	1.72195e-66			g16217	1.45342	1.65246e-53
	g34543	-2.89077	1.0554e-169								g56247	-1.27616	5.88965e-78			g4086	-1.97687	1.40127e-118			g38300	-1.40427	2.10908e-59			g50614	1.45337	1.2251e-52
	g13548	-2.89315	2.19275e-110								g3990	-1.27865	9.14237e-84			g1281	-1.97935	7.63767e-79			g33945	-1.40541	6.65761e-31			g25670	1.45308	4.86905e-17
	g13696	-2.89781	8.82711e-120								g35340	-1.28261	5.8128e-34			g26015	-1.98052	2.62951e-68			g35437	-1.40868	2.22634e-34			g25539	1.45221	2.07311e-18
	g35208	-2.91206	2.08497e-152								g25677	-1.28529	2.20168e-47			g58847	-1.99101	4.43799e-60			g32116	-1.40907	3.851e-34			g59145	1.45107	2.06722e-15
	g27170	-2.92342	6.96172e-68								g61980	-1.28574	8.25481e-141			g31496	-1.99212	5.85003e-133			g16744	-1.41161	4.83118e-46			g11916	1.45094	4.27619e-13
	g43366	-2.93481	4.48366e-123								g20336	-1.2858	1.70414e-56			g61318	-1.99231	9.53043e-159			g34954	-1.41444	3.3113e-25			g9141	1.44991	6.13775e-51
	g19911	-2.9422	3.92573e-73								g179	-1.28865	8.45103e-90			g47123	-1.99303	1.83805e-112			g47074	-1.41516	1.5471e-92			g13782	1.44944	2.91835e-17
	g14390	-2.94281	2.65765e-97								g61318	-1.2942	2.50863e-80			g60183	-1.99754	0			g13827	-1.41629	7.99132e-47			g49301	1.44786	8.202e-15
	g24348	-2.94427	4.31588e-74								g23440	-1.29481	2.50543e-207			g1387	-1.99762	5.51846e-81			g54136	-1.42014	6.76302e-100			g17446	1.44512	4.77233e-20
	g59630	-2.94444	2.07258e-195								g9706	-1.29804	1.07715e-281			g9721	-2.00204	8.81343e-142			g24960	-1.42186	1.18197e-71			g49874	1.44364	1.69303e-21
	g42088	-2.948	2.73427e-90								g48994	-1.30003	1.51958e-171			g30547	-2.00291	2.05005e-90			g62795	-1.42666	1.91166e-118			g5513	1.44202	1.77769e-26
	g59143	-2.94889	4.34859e-40								g34007	-1.3008	1.80183e-141			g53373	-2.00411	0			g8240	-1.43211	1.48365e-61			g24349	1.44157	1.21447e-12
	g30191	-2.95185	3.07792e-48								g54894	-1.30242	1.24481e-61			g34549	-2.00709	0			g31453	-1.43417	2.40356e-149			g34420	1.4391	1.18488e-67
	g20584	-2.95283	1.73725e-114								g41261	-1.30374	5.47441e-61			g50488	-2.00733	1.39052e-84			g30691	-1.43852	7.30279e-111			g42612	1.43869	6.09533e-25
	g20630	-2.95912	9.36228e-76								g12851	-1.30712	1.47724e-54			g43664	-2.01044	0			g21704	-1.44756	4.97749e-65			g30963	1.438	8.80233e-25
	g30051	-2.95916	2.16325e-135								g34407	-1.30796	2.19092e-144			g50602	-2.01977	2.16853e-83			g45063	-1.45006	9.68557e-69			g59823	1.43756	4.87811e-22
	g59809	-2.96219	2.056e-79								g20819	-1.31265	1.27852e-179			g4176	-2.02073	1.40448e-63			g24884	-1.45074	1.4108e-35			g21487	1.43617	9.89421e-21
	g48365	-2.96376	7.31902e-80								g5378	-1.31315	9.30907e-259			g60499	-2.02539	0			g6158	-1.45187	6.17878e-64			g60942	1.4331	4.72191e-12
	g53040	-2.97263	7.02001e-128								g54346	-1.31804	2.0918e-100			g54465	-2.02908	1.51254e-245			g64116	-1.45243	1.50321e-45			g257	1.43299	1.83961e-18
	g59996	-2.98155	5.01523e-73								g4012	-1.31905	6.49184e-183			g41999	-2.03136	1.05683e-60			g31856	-1.45254	7.09411e-53			g3348	1.43257	6.32409e-14
	g8969	-2.98535	2.44985e-262								g42823	-1.31908	4.43839e-148			g25672	-2.03813	1.56011e-137			g54109	-1.45654	2.96577e-97			g15891	1.43122	1.76641e-18
	g60440	-2.98845	1.02827e-91								g38960	-1.32319	8.72408e-48			g49604	-2.04089	4.66419e-70			g40897	-1.45779	3.42065e-61			g17152	1.43095	3.35851e-15
	g1466	-2.99267	1.66249e-130								g11735	-1.33327	8.37639e-186			g4530	-2.04159	1.41604e-128			g52942	-1.46447	4.7544e-47			g42784	1.43071	1.00286e-27
	g13554	-3.00364	2.21791e-76								g5551	-1.33363	2.9493e-101			g20022	-2.04311	0			g19028	-1.46901	1.50266e-31			g24343	1.42964	1.72782e-08
	g30535	-3.02188	5.91583e-221								g58362	-1.33412	1.29735e-205			g7151	-2.04431	0			g12263	-1.46986	3.69174e-171			g23246	1.42909	1.97528e-14
	g25528	-3.02393	5.67686e-120								g35437	-1.33587	2.34907e-50			g20672	-2.0446	2.45119e-90			g47077	-1.47803	2.41334e-94			g55224	1.42879	5.73498e-22
	g45843	-3.03427	1.09216e-88								g26463	-1.34826	5.5663e-114			g63877	-2.04731	0			g8786	-1.48146	1.80386e-38			g24050	1.42796	2.57282e-18
	g34481	-3.03872	1.23572e-165								g1269	-1.35232	0			g42372	-2.04805	4.68071e-65			g25417	-1.48275	5.22409e-57			g21727	1.42608	1.69605e-46
	g31626	-3.04572	8.95064e-257								g62735	-1.35279	4.90452e-43			g18506	-2.04933	2.53432e-213			g9817	-1.49429	4.13029e-61			g41795	1.42479	1.28194e-29
	g50113	-3.05132	1.40221e-90								g47	-1.35399	3.42901e-45			g49009	-2.04991	8.21414e-245			g9895	-1.49447	1.00608e-63			g26721	1.42444	1.91897e-11
	g25662	-3.05477	8.53119e-140								g53714	-1.36041	2.13371e-39			g49962	-2.05039	9.82518e-80			g12819	-1.49504	3.92557e-73			g50475	1.42051	5.3314e-17
	g51565	-3.05483	1.85564e-91								g9817	-1.36153	1.41214e-92			g13219	-2.05835	3.22889e-191			g46617	-1.49778	6.49419e-150			g12920	1.42022	5.63789e-09
	g54454	-3.05685	3.95548e-110								g22105	-1.3626	5.06695e-47			g34037	-2.05927	1.06075e-82			g1275	-1.49852	3.69433e-32			g14259	1.41954	8.90628e-16
	g14398	-3.05762	3.46552e-120								g20510	-1.36529	1.10946e-237			g50296	-2.0607	8.90445e-121			g5457	-1.50983	2.25152e-82			g25995	1.41646	6.12216e-14
	g41935	-3.06596	3.40584e-96								g46564	-1.36671	3.66353e-239			g23932	-2.06082	1.13993e-142			g8413	-1.51022	6.75438e-45			g63573	1.41418	7.66591e-20
	g62331	-3.06821	7.00395e-208								g34727	-1.37882	6.23494e-32			g252	-2.06327	0			g41887	-1.51045	9.14817e-44			g55871	1.41412	9.37746e-28
	g54084	-3.06837	6.05927e-117								g5092	-1.37885	3.8053e-190			g5789	-2.06912	1.53291e-265			g20526	-1.51479	1.10676e-67			g5655	1.41123	6.23641e-15
	g54325	-3.06839	7.60061e-110								g47680	-1.3798	9.03837e-55			g38436	-2.07111	2.89047e-156			g42978	-1.51756	5.69033e-45			g30331	1.41004	7.42142e-21
	g60362	-3.10024	6.38909e-197								g36554	-1.38036	5.91307e-114			g43435	-2.07207	1.43561e-128			g47256	-1.51766	1.09919e-31			g59115	1.40965	6.5344e-31
	g57960	-3.1082	3.79435e-295								g20781	-1.38174	4.13141e-61			g59012	-2.0729	1.15127e-122			g61216	-1.5192	3.04358e-58			g59945	1.40916	2.63555e-11
	g11499	-3.11406	7.46276e-85								g193	-1.3868	1.01827e-48			g41894	-2.0809	6.00267e-210			g43167	-1.52051	1.64764e-86			g42829	1.40754	1.34156e-40
	g34062	-3.11412	9.74026e-82								g54315	-1.39092	1.22264e-64			g61239	-2.08241	0			g54780	-1.52402	4.91301e-47			g4362	1.40385	1.90122e-14
	g50614	-3.11629	2.30801e-152								g5281	-1.39356	2.21215e-224			g1169	-2.08254	0			g1276	-1.52763	1.57834e-62			g24871	1.40368	5.21761e-34
	g29828	-3.13298	8.3656e-133								g10974	-1.3947	6.96974e-83			g4398	-2.08389	2.16169e-99			g29915	-1.53066	3.02753e-64			g1640	1.40314	5.41366e-14
	g59839	-3.13449	2.55734e-75								g30123	-1.39893	1.85411e-102			g60970	-2.08476	1.64495e-290			g860	-1.53785	6.41102e-57			g49741	1.40169	8.58853e-13
	g50612	-3.16321	2.58582e-66								g9403	-1.40058	4.93878e-259			g13834	-2.08509	0			g50610	-1.54131	6.8923e-25			g33695	1.40046	6.68599e-26
	g5088	-3.16586	1.56885e-206								g38710	-1.41219	5.64529e-70			g33402	-2.08673	7.37487e-136			g9483	-1.54374	3.39753e-61			g46399	1.40013	2.88092e-22
	g15856	-3.17228	3.20433e-103								g25077	-1.41247	5.25583e-68			g24059	-2.08788	9.52837e-107			g17201	-1.54617	1.65208e-48			g34092	1.39637	1.36087e-66
	g54461	-3.1765	3.61046e-173								g31678	-1.41581	1.02841e-164			g31592	-2.10046	0			g54346	-1.558	1.90097e-78			g35680	1.39623	2.16728e-34
	g11909	-3.18567	1.2525e-135								g42475	-1.42036	8.0037e-94			g30850	-2.1019	0			g41894	-1.55806	4.98973e-90			g16207	1.39602	5.78173e-29
	g54377	-3.18815	1.65575e-215								g51120	-1.42061	4.54178e-116			g59719	-2.10495	0			g20519	-1.55968	2.38614e-65			g1258	1.39582	1.07362e-22
	g59972	-3.21095	8.29569e-108								g33945	-1.42515	2.6825e-50			g38359	-2.10754	1.14624e-138			g47680	-1.57173	2.44003e-40			g33397	1.39523	1.04987e-14
	g818	-3.21565	2.72456e-89								g43041	-1.42528	1.2334e-44			g45801	-2.10766	1.16218e-179			g23987	-1.57445	2.55971e-64			g46367	1.39474	2.09394e-17
	g30460	-3.22591	3.12809e-75								g11668	-1.42545	1.76919e-103			g17512	-2.11265	5.47013e-78			g42729	-1.57685	1.29381e-53			g43715	1.39353	2.28191e-16
	g34243	-3.24637	1.48505e-189								g14843	-1.42555	6.50679e-63			g35236	-2.11286	8.53102e-101			g51122	-1.57706	3.89646e-56			g25502	1.39065	1.38656e-27
	g52724	-3.25397	2.29928e-103								g31411	-1.42718	8.93159e-45			g25818	-2.11346	2.64533e-127			g13073	-1.58119	4.09905e-45			g11683	1.38886	4.11816e-20
	g25531	-3.25414	1.5947e-85								g873	-1.42828	1.3894e-148			g4630	-2.11467	0			g47244	-1.58462	1.23532e-86			g6090	1.3887	1.22124e-36
	g49470	-3.25441	2.42905e-119								g63677	-1.43139	1.56814e-48			g30153	-2.11665	1.25535e-148			g63984	-1.58791	1.85485e-59			g47161	1.3869	2.60243e-28
	g60046	-3.25877	1.9893e-71								g4285	-1.43149	6.96311e-48			g50500	-2.11779	0			g34101	-1.59884	6.2841e-40			g34336	1.38675	8.00613e-21
	g24435	-3.26145	2.69156e-84								g40897	-1.43689	9.10391e-100			g42751	-2.11897	1.78952e-89			g31411	-1.60105	1.48686e-35			g19437	1.38547	3.25826e-16
	g29963	-3.27209	3.70517e-125								g30780	-1.43973	9.94881e-65			g24401	-2.12106	8.89276e-211			g53807	-1.60126	3.27594e-50			g63249	1.38361	8.15306e-30
	g29841	-3.28461	1.63357e-132								g43167	-1.4453	1.11757e-121			g39572	-2.12175	7.71578e-90			g23939	-1.60585	1.78595e-80			g48041	1.38188	1.59533e-42
	g42632	-3.28772	5.48495e-69								g26050	-1.44585	5.11831e-79			g17459	-2.12176	8.84273e-230			g35021	-1.60941	7.56269e-156			g9464	1.38101	1.63244e-16
	g58752	-3.28811	0								g9397	-1.44775	1.67184e-43			g35016	-2.13219	1.63574e-302			g43451	-1.61063	5.44255e-33			g59685	1.37947	1.79596e-11
	g34127	-3.29115	1.89866e-172								g20278	-1.45137	1.15074e-232			g46358	-2.13304	4.88283e-69			g39285	-1.6176	8.02509e-78			g8888	1.37682	2.70279e-14
	g62479	-3.29129	1.36913e-128								g63984	-1.45288	2.63024e-87			g33567	-2.13313	9.05821e-271			g40968	-1.62261	2.93927e-46			g54708	1.37672	2.37823e-24
	g1235	-3.29631	7.39157e-131								g61505	-1.45513	1.72942e-259			g4740	-2.13503	2.99499e-109			g59454	-1.62447	7.25049e-38			g41757	1.37589	6.50515e-18
	g58961	-3.30497	4.37024e-61								g41974	-1.45651	3.65924e-57			g60789	-2.13531	5.03372e-119			g33880	-1.626	4.23224e-117			g54234	1.37315	1.43389e-21
	g59562	-3.31534	3.55531e-118								g19028	-1.45679	1.00369e-45			g51349	-2.13532	1.77692e-161			g42575	-1.63463	9.96201e-71			g49618	1.37313	1.97308e-18
	g58655	-3.33049	4.37755e-121								g27473	-1.46082	1.18707e-45			g29483	-2.13704	1.29396e-168			g62735	-1.63735	2.6357e-36			g14677	1.37226	1.11561e-35
	g54820	-3.33496	2.81819e-165								g61216	-1.46111	2.40279e-80			g21739	-2.13779	0			g11668	-1.63808	3.22901e-70			g5364	1.36874	1.59426e-13
	g30791	-3.34585	3.82051e-86								g59752	-1.46323	2.34906e-47			g9347	-2.14036	0			g20374	-1.64353	5.66825e-28			g4433	1.36862	2.61938e-50
	g38850	-3.34742	6.06629e-225								g42350	-1.46624	3.89117e-57			g43774	-2.14112	0			g45799	-1.65172	1.64399e-56			g3966	1.36816	6.41347e-17
	g34471	-3.35526	1.00272e-74								g29616	-1.46888	5.51372e-129			g13128	-2.14373	3.47123e-155			g54990	-1.65229	4.53442e-70			g31501	1.36756	2.44551e-22
	g34998	-3.35979	2.16587e-79								g40754	-1.47773	9.12488e-64			g19337	-2.1512	1.98152e-124			g38646	-1.65247	3.1715e-83			g31571	1.36718	6.63485e-17
	g337	-3.3847	2.38111e-121								g57949	-1.48054	5.85838e-46			g59502	-2.15757	9.84823e-111			g12517	-1.65775	1.21161e-35			g17211	1.36265	2.67082e-16
	g17995	-3.40702	2.46277e-127								g41887	-1.48344	6.0073e-73			g9993	-2.15767	9.51062e-110			g5555	-1.6587	2.99222e-48			g38689	1.3626	7.88695e-34
	g5344	-3.41568	7.71127e-154								g43297	-1.4889	6.65593e-130			g64072	-2.15815	0			g29906	-1.65959	1.59691e-169			g50874	1.362	1.49098e-50
	g54657	-3.42456	5.77547e-130								g31823	-1.48932	1.26432e-220			g47081	-2.16029	1.99077e-143			g58517	-1.66598	1.8981e-41			g40686	1.36199	1.22097e-30
	g60161	-3.43758	8.32788e-212								g8758	-1.49404	3.68753e-289			g17181	-2.16376	5.71481e-119			g43328	-1.66707	5.3522e-49			g5433	1.36098	5.78354e-14
	g13864	-3.44654	2.41713e-193								g9895	-1.49417	4.79794e-94			g34727	-2.16424	4.42682e-74			g1477	-1.66888	1.40477e-62			g54330	1.36092	2.53993e-22
	g53292	-3.46044	7.51912e-96								g1055	-1.49544	7.19592e-52			g13081	-2.16455	0			g59752	-1.66993	9.12865e-39			g61193	1.36065	1.68616e-50
	g24062	-3.48203	3.16563e-98								g47074	-1.49746	2.51988e-151			g33528	-2.16473	3.05843e-77			g13518	-1.67358	6.51701e-40			g60238	1.36019	3.62907e-52
	g58297	-3.48858	1.61744e-127								g25417	-1.50669	7.90726e-98			g42642	-2.16587	4.35808e-289			g38960	-1.67438	6.61997e-44			g30984	1.35706	4.72391e-19
	g29833	-3.49769	2.55541e-293								g6158	-1.50687	6.69273e-111			g1290	-2.1721	5.04056e-104			g54876	-1.69336	2.18669e-170			g9439	1.35647	7.83065e-09
	g23469	-3.51605	5.58742e-284								g52942	-1.51305	1.18932e-68			g1106	-2.17418	8.47191e-133			g50548	-1.69434	2.89428e-81			g38385	1.35556	4.75904e-12
	g5396	-3.5203	3.52835e-250								g13931	-1.51376	7.19873e-213			g58786	-2.17753	1.64832e-92			g61055	-1.696	3.62792e-80			g42477	1.354	1.39532e-49
	g23446	-3.52868	5.33408e-52								g14255	-1.51388	5.53144e-73			g54681	-2.17757	3.44959e-164			g20638	-1.69834	2.31898e-102			g47131	1.35367	6.92285e-30
	g34999	-3.55209	6.09754e-107								g25355	-1.51738	1.99826e-98			g21284	-2.17767	2.09391e-97			g50608	-1.70089	3.45119e-133			g50595	1.35291	2.8253e-14
	g30083	-3.55436	1.92223e-96								g64116	-1.52527	5.58519e-70			g57145	-2.17835	5.84218e-96			g29422	-1.70338	1.98801e-36			g16577	1.35111	1.0538e-22
	g58790	-3.56592	8.29626e-88								g5457	-1.52663	5.12913e-132			g49063	-2.18155	7.04537e-140			g29087	-1.70825	9.42943e-58			g54286	1.34917	2.83376e-56
	g43210	-3.5926	2.36695e-135								g51669	-1.52756	7.48143e-259			g35004	-2.18261	2.02695e-194			g25157	-1.71128	7.73751e-156			g30966	1.34724	1.58103e-21
	g7933	-3.63915	1.09701e-106								g13827	-1.52788	1.39723e-77			g33235	-2.18675	3.4491e-163			g54957	-1.7156	9.04368e-51			g23452	1.34544	5.1769e-24
	g17408	-3.65584	1.97151e-98								g34221	-1.53706	1.90731e-230			g41630	-2.19054	3.20895e-113			g59568	-1.71948	1.10759e-96			g34146	1.34491	1.08297e-32
	g35097	-3.65589	7.80676e-114								g60970	-1.54115	5.47072e-172			g42645	-2.19307	2.63883e-286			g17392	-1.72148	6.45024e-61			g722	1.34411	1.27342e-10
	g61336	-3.66468	4.22492e-253								g23939	-1.54357	4.69794e-117			g60867	-2.19396	9.55109e-112			g5403	-1.72192	4.06226e-77			g720	1.34357	3.97549e-17
	g25066	-3.66791	7.78272e-107								g25157	-1.54403	2.4229e-203			g416	-2.19684	0			g193	-1.72558	1.72949e-41			g55116	1.34347	3.45234e-20
	g29221	-3.68627	3.09012e-98								g56359	-1.54577	2.01538e-69			g50581	-2.20073	0			g463	-1.72756	3.02004e-54			g14662	1.33894	1.87054e-08
	g29755	-3.68883	8.43561e-171								g63563	-1.55056	4.79472e-57			g13945	-2.21057	2.05387e-78			g41750	-1.72775	1.24231e-73			g16034	1.33804	1.23593e-16
	g14294	-3.70881	1.33638e-295								g45063	-1.55196	2.63912e-97			g31194	-2.21073	1.3073e-103			g34109	-1.72978	1.11792e-37			g31734	1.33702	5.77029e-31
	g42843	-3.71999	4.8172e-238								g860	-1.55248	5.11048e-85			g5118	-2.21227	0			g20676	-1.73974	7.61284e-145			g14227	1.33549	6.31802e-21
	g58794	-3.72887	3.69052e-96								g27905	-1.55294	1.47301e-48			g38960	-2.21301	1.9269e-98			g30695	-1.74409	2.86323e-101			g60535	1.33322	1.62953e-12
	g1899	-3.73063	7.59743e-100								g525	-1.55294	9.78587e-98			g45581	-2.21554	1.35148e-72			g10264	-1.74939	5.56484e-63			g42462	1.33112	1.27083e-28
	g34092	-3.73622	4.85309e-204								g40968	-1.55648	2.2974e-57			g50447	-2.21985	0			g603	-1.75621	2.62867e-37			g10024	1.3307	1.88692e-51
	g43714	-3.75242	4.50603e-129								g39572	-1.55685	2.07596e-54			g58521	-2.22152	0			g35192	-1.76142	6.21281e-94			g30906	1.33044	5.48538e-31
	g61192	-3.75523	9.0257e-116								g27321	-1.55884	6.00209e-94			g42876	-2.2218	0			g54791	-1.76297	2.69044e-51			g20687	1.33	9.06531e-26
	g30848	-3.76605	2.3598e-96								g4551	-1.56224	1.25267e-75			g58267	-2.22212	6.91327e-174			g46602	-1.76318	3.2145e-38			g4922	1.32956	5.50882e-09
	g1199	-3.77549	5.41755e-104								g1477	-1.56469	1.03845e-96			g30995	-2.22238	4.00141e-250			g873	-1.76768	1.33937e-121			g63861	1.32923	9.67522e-10
	g25067	-3.79624	1.9676e-91								g58517	-1.56665	2.40519e-43			g62	-2.22713	0			g14255	-1.77051	5.28186e-56			g55960	1.32846	3.04334e-44
	g42477	-3.80987	2.03269e-262								g54957	-1.56765	3.19152e-66			g35037	-2.22844	3.22046e-132			g60863	-1.77594	1.90427e-72			g9389	1.32841	2.32035e-21
	g38169	-3.81518	4.15667e-84								g38300	-1.5728	2.87248e-99			g31082	-2.23614	6.47779e-72			g41974	-1.77787	1.3554e-44			g4304	1.32778	4.22205e-16
	g45120	-3.84111	5.93257e-97								g30691	-1.57778	1.78953e-201			g52228	-2.23615	2.2079e-108			g15692	-1.78098	1.66612e-79			g5339	1.32535	3.68175e-11
	g25524	-3.88034	1.3603e-203								g20638	-1.57818	7.06574e-128			g52761	-2.23716	5.28637e-175			g25459	-1.78872	2.01209e-33			g53950	1.3248	1.48602e-32
	g34152	-3.90348	2.25447e-136								g16688	-1.57898	6.43301e-203			g5752	-2.23949	0			g37262	-1.78961	5.72488e-70			g35291	1.32434	8.44422e-16
	g51050	-3.90924	6.69289e-297								g55219	-1.58846	1.65475e-56			g2456	-2.23966	0			g17456	-1.78996	8.55097e-179			g25923	1.32375	5.11073e-48
	g37613	-3.92022	1.97266e-88								g53745	-1.58977	5.01125e-113			g19479	-2.24037	0			g55219	-1.7909	7.01929e-39			g48932	1.3232	7.60548e-15
	g61107	-3.92431	9.76174e-196								g62795	-1.59243	9.75038e-219			g31104	-2.24461	2.94931e-250			g29607	-1.79748	1.79571e-72			g3472	1.3223	4.65691e-31
	g17267	-3.92783	1.65062e-157								g35021	-1.59306	5.5053e-222			g21844	-2.25115	0			g14242	-1.7993	5.06469e-57			g62637	1.32019	7.31666e-33
	g47819	-3.93208	1.24431e-149								g17201	-1.59389	4.87971e-67			g31545	-2.25292	2.05999e-79			g11681	-1.80992	3.09376e-111			g9325	1.31944	7.82319e-24
	g42024	-3.95607	2.1331e-114								g50532	-1.59618	3.77012e-93			g23739	-2.25691	0			g42657	-1.8112	5.99626e-149			g49788	1.31911	9.57422e-16
	g54887	-3.95955	3.909e-127								g30695	-1.59641	1.5253e-139			g444	-2.25916	1.01036e-92			g25976	-1.81262	3.04044e-118			g39121	1.31892	7.71991e-21
	g30825	-3.97078	4.9986e-143								g10197	-1.59718	4.98861e-55			g21133	-2.25955	0			g25818	-1.81382	1.16964e-74			g55133	1.31805	9.95578e-34
	g34254	-3.97683	2.2222e-87								g17392	-1.59908	2.82594e-79			g5271	-2.261	7.27754e-118			g38835	-1.81866	6.09697e-56			g58358	1.31799	6.12647e-23
	g5146	-3.99259	9.37132e-99								g29422	-1.60479	1.63516e-56			g12892	-2.262	3.35118e-301			g35068	-1.82006	1.76976e-37			g34340	1.31717	7.01142e-53
	g53962	-4.00976	1.19401e-125								g46617	-1.61687	6.02393e-269			g20810	-2.26639	0			g25356	-1.82386	4.51363e-39			g26028	1.31698	3.19594e-25
	g46336	-4.0265	7.00875e-153								g35192	-1.6209	3.46795e-130			g47140	-2.26951	0			g38686	-1.82562	4.63307e-49			g135	1.31438	9.0193e-11
	g5098	-4.04914	6.96544e-256								g39213	-1.63086	9.66838e-136			g60475	-2.27074	2.73595e-83			g43148	-1.82576	4.29005e-55			g59494	1.31419	5.23839e-27
	g54659	-4.0532	3.2521e-175								g29906	-1.63761	2.19144e-252			g28548	-2.27323	1.80935e-87			g23740	-1.8345	1.04524e-47			g50930	1.31187	1.44713e-18
	g23156	-4.09222	5.99266e-138								g58198	-1.6385	4.34292e-49			g60445	-2.27426	3.2372e-218			g14521	-1.836	9.07013e-46			g1862	1.30885	2.81319e-28
	g58960	-4.09516	2.89063e-127								g34430	-1.63921	1.23161e-95			g10534	-2.27462	0			g58990	-1.8391	3.76157e-71			g13533	1.3071	4.00925e-46
	g4732	-4.14851	4.13518e-193								g29087	-1.64086	3.28664e-72			g58982	-2.2768	0			g58198	-1.84902	6.83501e-36			g42253	1.30333	8.34585e-25
	g33892	-4.15367	1.26159e-105								g9483	-1.64676	3.46467e-91			g46545	-2.27896	0			g10197	-1.8552	9.39808e-40			g4166	1.30192	2.76102e-19
	g31079	-4.15843	4.72446e-105								g42978	-1.65732	1.97645e-74			g9821	-2.27977	9.98999e-156			g38683	-1.85538	1.90443e-114			g61488	1.30036	1.49552e-18
	g58284	-4.17487	4.22776e-112								g54990	-1.65769	9.69468e-111			g36358	-2.28242	1.62646e-181			g16715	-1.86358	1.5438e-189			g54337	1.29951	5.20601e-21
	g29936	-4.20374	8.82627e-111								g60863	-1.66468	9.16232e-90			g44940	-2.28523	1.05897e-124			g63563	-1.86488	1.83783e-48			g25287	1.29438	3.17539e-20
	g19518	-4.20692	1.46732e-110								g31490	-1.67466	2.50564e-67			g58036	-2.29233	1.24021e-144			g34448	-1.87303	2.6985e-94			g5119	1.29368	6.44336e-25
	g31073	-4.20901	1.28626e-115								g30585	-1.6784	2.57908e-65			g1172	-2.29496	0			g5498	-1.87823	1.5437e-48			g161	1.29311	5.85689e-12
	g29798	-4.23462	3.54305e-81								g15866	-1.68148	1.28124e-83			g42084	-2.29598	0			g61318	-1.88088	3.50281e-82			g59541	1.29251	1.77969e-16
	g42466	-4.28234	6.60054e-156								g34037	-1.68331	1.61045e-63			g6382	-2.29875	0			g55040	-1.88239	3.52126e-216			g24709	1.29128	5.25231e-19
	g43239	-4.29028	2.24985e-188								g16715	-1.69404	3.695e-251			g19770	-2.29967	0			g38107	-1.88301	7.72859e-115			g60458	1.29124	4.81227e-35
	g37044	-4.29886	3.94791e-117								g1276	-1.69853	3.69053e-110			g49304	-2.29994	2.59942e-57			g29200	-1.88324	1.24679e-32			g26941	1.2904	1.36896e-22
	g16369	-4.32476	2.17203e-149								g29607	-1.70423	6.20863e-96			g8934	-2.30062	1.93549e-106			g38350	-1.89541	2.19612e-144			g60436	1.28878	8.70019e-44
	g48449	-4.34059	1.16587e-106								g15692	-1.70454	9.59393e-120			g60170	-2.30457	2.17366e-87			g8476	-1.90631	1.21273e-86			g20154	1.28752	1.07831e-37
	g44152	-4.36225	6.81571e-110								g38683	-1.70839	8.7214e-153			g61672	-2.306	3.24055e-244			g12238	-1.90869	1.40265e-57			g13730	1.28731	5.03718e-11
	g35170	-4.37169	9.81114e-169								g42725	-1.71055	2.69331e-116			g1904	-2.30616	5.69142e-51			g42961	-1.90884	8.83179e-52			g42468	1.28684	9.20446e-23
	g47082	-4.37821	2.44807e-210								g34477	-1.7111	2.90346e-66			g39165	-2.30692	0			g58847	-1.90986	7.04045e-39			g58655	1.28684	3.02403e-44
	g23938	-4.39508	1.65349e-151								g20519	-1.71138	1.73166e-100			g35073	-2.30702	2.61722e-138			g2433	-1.91129	1.83497e-93			g54953	1.28617	4.59486e-24
	g59654	-4.41072	1.06167e-181								g5155	-1.71955	2.1298e-91			g46227	-2.30787	7.20944e-299			g24978	-1.9167	1.10955e-52			g13864	1.28498	2.73863e-63
	g9290	-4.43121	1.49987e-199								g26854	-1.72764	6.5462e-53			g333	-2.30821	0			g24713	-1.91794	2.93042e-45			g23686	1.28392	1.9824e-07
	g42093	-4.43623	1.06163e-285								g5403	-1.7281	5.37586e-118			g39231	-2.31163	1.57168e-152			g42779	-1.91802	2.00109e-71			g58913	1.28261	2.16437e-38
	g30658	-4.43929	7.04878e-178								g8786	-1.72993	2.55815e-69			g11686	-2.31288	8.65746e-97			g4294	-1.92091	2.02343e-132			g21485	1.28225	9.42593e-37
	g63816	-4.44484	1.5271e-192								g23476	-1.73211	7.62922e-66			g11405	-2.31423	4.90125e-94			g59663	-1.92344	9.34539e-27			g25381	1.2814	2.94007e-24
	g13867	-4.56689	3.02088e-115								g53807	-1.73587	7.89328e-91			g26761	-2.3188	6.5566e-242			g25019	-1.92691	2.83339e-41			g19369	1.28105	4.25776e-13
	g39016	-4.58116	1.79731e-104								g59568	-1.73676	1.2492e-148			g29915	-2.32073	8.13311e-163			g42725	-1.93172	1.75614e-89			g4975	1.27732	3.04455e-24
	g61335	-4.59745	7.53824e-163								g20847	-1.74033	4.43625e-102			g13155	-2.32383	1.47569e-127			g13408	-1.93345	6.70494e-120			g19710	1.27681	1.5039e-14
	g1029	-4.62992	2.88355e-107								g42729	-1.74117	2.15528e-85			g23981	-2.32415	1.94391e-161			g57028	-1.93766	8.52611e-50			g34032	1.2752	1.14845e-11
	g54769	-4.63016	1.94004e-231								g20526	-1.7455	1.54329e-111			g4591	-2.32728	2.99291e-101			g16688	-1.94098	1.49095e-164			g60715	1.27419	2.03993e-12
	g59226	-4.64304	1.97932e-187								g12517	-1.74639	6.37923e-53			g1094	-2.32879	1.92985e-102			g835	-1.94108	6.64733e-39			g19596	1.27335	5.1356e-28
	g12268	-4.72502	1.50272e-105								g26453	-1.747	2.45615e-49			g20358	-2.33226	0			g5155	-1.95521	9.17619e-64			g30345	1.27231	5.12286e-24
	g37633	-4.74677	2.19383e-203								g8476	-1.7533	1.72206e-125			g23668	-2.33572	6.58772e-162			g54885	-1.9558	2.11564e-117			g30104	1.27122	9.84873e-69
	g37055	-4.74968	1.01416e-160								g43328	-1.75473	3.14655e-73			g31397	-2.33692	0			g13792	-1.95612	2.35657e-79			g23950	1.258	9.66522e-23
	g43658	-4.76276	1.04302e-126								g39285	-1.7572	4.38605e-143			g39004	-2.33698	0			g13183	-1.96524	2.23893e-58			g59777	1.25794	8.07368e-12
	g58979	-4.78442	5.89953e-170								g25356	-1.75859	8.6869e-57			g24977	-2.33869	0			g29818	-1.96849	4.61742e-42			g24522	1.25677	1.0658e-12
	g35093	-4.78986	1.54948e-133								g23987	-1.75891	7.71149e-126			g12843	-2.33876	3.40693e-256			g58903	-1.97146	2.89338e-88			g31626	1.2558	5.93357e-50
	g25435	-4.79001	6.56229e-169								g9077	-1.75924	1.20797e-68			g41625	-2.34219	3.63526e-298			g63907	-1.97319	1.95626e-132			g29548	1.25568	1.33835e-08
	g20967	-4.79609	1.10379e-147								g381	-1.76262	3.78016e-64			g43460	-2.34318	0			g34782	-1.98293	2.6131e-53			g1904	1.25254	1.5984e-29
	g24415	-4.80376	1.54316e-107								g31856	-1.76268	6.18636e-91			g3899	-2.34713	5.84136e-99			g9641	-1.98892	7.79082e-79			g51966	1.25035	3.37791e-15
	g46570	-4.81693	3.22311e-129								g21704	-1.7662	1.43395e-123			g5003	-2.3481	3.26344e-130			g11793	-1.98897	4.68466e-48			g49783	1.24984	2.6509e-19
	g59399	-4.84218	7.80823e-193								g49604	-1.77251	6.51691e-60			g44968	-2.34994	2.89265e-148			g38044	-1.98955	5.32138e-219			g43371	1.24932	3.57895e-20
	g29743	-4.84691	8.18466e-157								g47107	-1.78015	1.67368e-72			g58673	-2.35281	0			g31396	-1.99334	1.97732e-212			g27064	1.24843	8.43343e-26
	g59369	-4.86296	1.65071e-163								g64097	-1.78777	0			g37937	-2.35334	0			g10265	-2.00113	6.62429e-78			g30358	1.24686	4.53624e-08
	g34467	-4.87337	1.01397e-168								g47244	-1.78965	1.71618e-150			g32176	-2.35646	2.24983e-280			g54350	-2.01485	2.56237e-265			g61	1.2463	1.6898e-27
	g50910	-4.90425	2.53105e-135								g59521	-1.79253	3.11309e-119			g13650	-2.35778	5.6878e-173			g5577	-2.01555	5.94068e-71			g16515	1.24585	9.39967e-19
	g17317	-4.90993	2.53756e-132								g25907	-1.79754	8.67732e-52			g24063	-2.36147	0			g9529	-2.01944	1.07295e-52			g55653	1.24519	1.84688e-14
	g59846	-4.91293	4.61225e-145								g38959	-1.80086	1.70412e-232			g55047	-2.36212	7.37025e-137			g8934	-2.0199	5.21639e-60			g20151	1.24508	4.98057e-18
	g24788	-4.94881	3.41204e-135								g58990	-1.80445	5.30691e-97			g50425	-2.36366	1.79878e-296			g64097	-2.0209	8.05066e-202			g24300	1.24502	9.27003e-08
	g60443	-5.01363	4.60751e-113								g20676	-1.80898	2.37217e-237			g53244	-2.36458	0			g35290	-2.02166	1.66736e-112			g29833	1.24491	1.1275e-49
	g41081	-5.02264	1.25531e-127								g42717	-1.81048	3.6459e-65			g9751	-2.36746	0			g20847	-2.02202	8.04892e-74			g41624	1.24374	1.56606e-13
	g16955	-5.06128	7.15896e-77								g13518	-1.81091	1.74364e-63			g48682	-2.36807	1.03744e-164			g34209	-2.02238	1.37311e-79			g43657	1.24317	3.01686e-33
	g372	-5.06716	3.3199e-92								g8831	-1.81268	1.01186e-55			g9185	-2.37431	1.75626e-161			g31545	-2.02611	4.6161e-46			g15691	1.24203	1.65538e-08
	g20273	-5.07925	4.80159e-120								g20467	-1.81494	3.52815e-167			g60272	-2.37454	0			g57671	-2.02769	5.88665e-75			g31267	1.24148	7.15489e-16
	g50319	-5.13069	2.37728e-101								g9529	-1.81621	1.07581e-73			g43959	-2.37678	4.83467e-162			g25907	-2.02808	1.60827e-44			g34467	1.23984	3.3916e-32
	g43274	-5.22255	2.00893e-104								g5498	-1.82134	1.38214e-60			g59093	-2.37784	0			g49936	-2.03235	9.38389e-188			g12449	1.23943	1.08642e-22
	g20600	-5.22851	4.91353e-264								g44940	-1.82648	3.07832e-91			g60257	-2.37851	0			g1387	-2.03879	6.13022e-52			g54001	1.23891	2.07744e-22
	g9356	-5.24585	2.53458e-165								g33880	-1.82768	4.18244e-223			g24433	-2.38001	1.85344e-274			g8923	-2.03998	3.57381e-112			g61319	1.23867	5.08141e-41
	g24090	-5.2971	8.64721e-171								g12238	-1.82906	1.2121e-85			g4939	-2.38018	6.25571e-67			g34710	-2.0424	2.23648e-48			g29437	1.23792	6.48238e-29
	g30857	-5.30029	5.10694e-247								g8923	-1.82941	3.04682e-156			g33458	-2.38112	9.77765e-154			g10238	-2.04426	3.97124e-92			g43348	1.23759	1.33806e-13
	g42333	-5.33408	4.80925e-133								g55040	-1.82991	0			g45761	-2.38332	0			g47107	-2.04764	9.18859e-56			g51620	1.23522	5.90531e-22
	g19636	-5.36513	7.73836e-129								g54780	-1.83602	6.40631e-83			g54429	-2.38513	0			g60970	-2.04776	6.21351e-153			g16410	1.23516	5.30191e-18
	g20365	-5.41325	8.91635e-156								g38107	-1.83652	2.14077e-176			g59328	-2.38534	0			g38959	-2.04939	1.00345e-176			g61616	1.23386	2.35366e-11
	g34455	-5.43485	1.25633e-124								g38350	-1.83811	1.73787e-199			g60246	-2.38665	2.26576e-154			g59925	-2.0532	1.94787e-53			g5081	1.2333	3.55609e-16
	g37181	-5.44146	2.05053e-132								g603	-1.83888	1.95361e-67			g24592	-2.39187	4.79411e-172			g12175	-2.05481	1.95863e-66			g54958	1.2312	6.01143e-33
	g25764	-5.4425	6.92722e-220								g42961	-1.84171	3.55228e-77			g35362	-2.39293	0			g31189	-2.05582	6.80865e-162			g54581	1.23078	1.13434e-10
	g58189	-5.44646	1.16732e-121								g10264	-1.84361	4.44515e-101			g49933	-2.39942	0			g31384	-2.0605	1.51714e-107			g4441	1.22964	1.52048e-23
	g54220	-5.4652	6.89564e-132								g14242	-1.84399	6.85077e-85			g9445	-2.4008	9.15351e-266			g26774	-2.06102	6.62447e-156			g34805	1.22879	1.71752e-11
	g55229	-5.46794	1.43839e-131								g25818	-1.8441	5.17685e-100			g24776	-2.40394	2.45687e-193			g60710	-2.06816	2.40238e-52			g40225	1.22847	4.70935e-14
	g4400	-5.48211	1.60859e-151								g54876	-1.84427	1.53112e-285			g17481	-2.4056	1.48757e-116			g60513	-2.07419	5.02901e-68			g46393	1.22825	1.9685e-17
	g29282	-5.52256	2.14515e-99								g34448	-1.84466	1.73597e-133			g34283	-2.40803	0			g49604	-2.07576	3.84203e-49			g24278	1.22816	1.88318e-24
	g24584	-5.52554	1.53044e-211								g50608	-1.85088	6.34954e-228			g64064	-2.41123	0			g34727	-2.07692	3.61611e-40			g60258	1.2277	3.09561e-30
	g42323	-5.56672	2.81499e-136								g44968	-1.85769	7.39466e-104			g43076	-2.41312	9.3655e-111			g34037	-2.07789	2.15822e-50			g4414	1.22627	2.02558e-11
	g29342	-5.67365	1.59568e-99								g17456	-1.86395	7.42802e-273			g25903	-2.4132	3.03103e-100			g24776	-2.08141	1.20945e-105			g60797	1.22525	5.7365e-09
	g8434	-5.69358	8.15532e-236								g46602	-1.86397	1.07238e-56			g5341	-2.41955	0			g27905	-2.08167	8.22124e-47			g45944	1.22391	1.95841e-20
	g9272	-5.76914	2.69447e-164								g45799	-1.86628	2.11198e-106			g7125	-2.42075	0			g56269	-2.08327	3.12626e-87			g25310	1.22295	4.31e-11
	g26214	-5.84482	1.39622e-121								g57028	-1.87721	2.79774e-66			g35227	-2.42467	3.12761e-92			g25134	-2.08341	2.01212e-38			g14019	1.22291	2.10016e-17
	g46829	-5.84854	7.15239e-171								g50610	-1.88022	4.2307e-56			g13564	-2.42491	0			g29378	-2.08475	2.7858e-82			g61511	1.22061	2.30243e-10
	g1019	-5.84985	8.7149e-154								g59454	-1.88403	7.24437e-65			g34449	-2.42806	0			g12836	-2.08874	1.39749e-68			g51895	1.22024	1.1275e-16
	g30645	-5.94733	6.86025e-161								g42575	-1.89122	3.46032e-128			g7173	-2.4288	0			g60543	-2.09419	5.6518e-106			g50600	1.22018	1.34598e-11
	g14668	-5.97883	7.36518e-127								g9641	-1.89405	4.47021e-109			g62201	-2.42917	1.41518e-118			g19548	-2.09677	6.86703e-43			g13934	1.21622	4.58996e-12
	g549	-5.9789	2.51352e-151								g2433	-1.89561	2.39706e-134			g4159	-2.43062	9.92663e-168			g357	-2.09752	3.76044e-98			g38336	1.2162	7.44425e-07
	g20436	-6.00388	7.59527e-116								g4987	-1.90325	2.5094e-69			g1863	-2.43176	1.66878e-209			g8698	-2.0989	6.89363e-50			g38010	1.2153	4.35693e-22
	g31588	-6.04899	1.07205e-117								g1387	-1.90422	6.85057e-66			g43118	-2.43256	0			g58762	-2.10043	2.466e-72			g12598	1.21187	1.45923e-11
	g48102	-6.05094	8.15048e-121								g34782	-1.9057	5.219e-73			g43150	-2.43411	1.22576e-265			g31490	-2.10089	6.153e-62			g48365	1.21164	9.17615e-16
	g50146	-6.07914	3.02662e-179								g25976	-1.90898	1.40379e-178			g61561	-2.44112	0			g19690	-2.10277	9.99936e-90			g13666	1.20966	9.43514e-17
	g30918	-6.0881	3.19851e-136								g357	-1.90947	8.61693e-136			g9963	-2.44375	1.64358e-300			g9077	-2.10415	1.83284e-57			g30578	1.20845	9.89363e-18
	g62273	-6.16274	4.71935e-125								g463	-1.91122	4.03741e-89			g297	-2.44502	0			g9194	-2.10719	5.51982e-227			g34168	1.20693	5.81259e-05
	g34440	-6.20886	2.70288e-170								g5555	-1.91287	2.05341e-77			g26136	-2.44708	3.23965e-262			g53064	-2.11068	3.86407e-53			g14262	1.20601	3.51334e-57
	g60795	-6.22817	2.11847e-163								g42425	-1.92579	9.7467e-43			g17947	-2.4479	0			g34019	-2.11575	4.0934e-119			g34977	1.20407	4.0367e-11
	g24081	-6.23432	2.46681e-121								g43148	-1.93756	6.24393e-81			g13123	-2.44882	3.52837e-128			g55787	-2.11675	1.0314e-59			g14106	1.20274	1.61226e-23
	g37350	-6.25171	2.40966e-202								g14521	-1.94329	1.26832e-68			g53218	-2.44886	1.43986e-159			g4530	-2.11899	9.05517e-78			g3941	1.20221	2.21958e-18
	g26813	-6.28996	1.62081e-143								g5577	-1.94519	9.45846e-103			g34206	-2.45188	0			g39572	-2.12411	3.00513e-54			g16471	1.19682	3.20114e-18
	g30826	-6.30096	4.6592e-127								g58903	-1.95009	1.56056e-132			g31548	-2.45226	1.15801e-75			g63735	-2.1316	1.11555e-149			g25248	1.19566	1.0195e-14
	g17420	-6.3071	4.10234e-176								g11681	-1.95029	4.09522e-181			g29134	-2.45512	0			g13238	-2.13898	8.14263e-151			g54846	1.1953	1.15069e-26
	g41706	-6.31711	6.88144e-141								g32564	-1.95515	4.48291e-84			g41083	-2.4554	9.83267e-160			g23818	-2.15116	3.95499e-101			g27454	1.19501	2.52431e-16
	g5237	-6.31818	2.62196e-160								g24713	-1.95897	5.33796e-75			g37880	-2.45725	1.75145e-108			g20623	-2.1562	3.35516e-101			g59582	1.19269	1.37161e-07
	g1296	-6.34715	4.75105e-164								g38835	-1.96098	3.81835e-99			g49871	-2.45782	0			g14633	-2.16065	2.03308e-50			g12522	1.19104	1.96141e-33
	g54155	-6.39357	1.52027e-175								g61055	-1.97001	1.32032e-137			g28261	-2.4579	7.52254e-292			g42315	-2.1685	1.13313e-113			g41081	1.18902	4.11419e-28
	g55261	-6.40545	4.78896e-172								g13408	-1.9746	2.14043e-185			g48926	-2.46131	0			g43049	-2.16903	2.53724e-70			g47667	1.18893	1.1136e-50
	g16836	-6.41688	1.47122e-192								g13792	-1.98142	8.68509e-122			g30317	-2.46245	2.6038e-102			g24610	-2.16932	5.11532e-43			g54278	1.18843	1.8161e-22
	g54335	-6.43161	1.04355e-173								g58847	-1.98206	2.23307e-61			g30015	-2.46285	2.16744e-109			g50602	-2.17058	8.71481e-55			g20445	1.1863	6.47705e-13
	g35432	-6.45933	1.40686e-155								g10238	-1.99219	1.88343e-140			g5240	-2.46348	0			g721	-2.17875	2.17533e-38			g34722	1.18591	1.38774e-33
	g24611	-6.45998	2.7951e-128								g14633	-2.00513	2.01028e-70			g42837	-2.46452	0			g9018	-2.17892	1.18846e-126			g13465	1.18394	1.38013e-20
	g36868	-6.49016	3.61379e-142								g41750	-2.01089	1.24782e-129			g9989	-2.46657	0			g23932	-2.18081	2.30542e-83			g25943	1.18094	8.80066e-25
	g56819	-6.53495	1.27897e-248								g23740	-2.01863	5.59402e-68			g34447	-2.46987	3.70341e-203			g25257	-2.18207	2.74468e-190			g18478	1.17916	1.01205e-39
	g19673	-6.53693	5.85677e-131								g35068	-2.02029	1.09899e-65			g53721	-2.47112	6.37459e-283			g13592	-2.1841	5.18543e-213			g47098	1.17903	2.59503e-11
	g12068	-6.58167	7.61402e-220								g42779	-2.02056	5.25351e-107			g9736	-2.47399	0			g20715	-2.18581	2.34095e-205			g34582	1.17865	1.19539e-14
	g43387	-6.64882	5.53417e-227								g37262	-2.02499	2.09433e-113			g30417	-2.47469	4.24667e-131			g42717	-2.18619	8.93838e-48			g58678	1.17863	1.25941e-12
	g20840	-6.70405	1.35336e-145								g60764	-2.03347	1.36175e-58			g55677	-2.47551	5.37077e-144			g765	-2.18892	4.0629e-59			g54808	1.17786	3.42809e-12
	g9331	-6.70438	6.5364e-167								g31148	-2.03393	3.09996e-95			g21557	-2.47836	0			g33780	-2.19722	9.5971e-75			g42420	1.17773	7.88822e-20
	g42099	-6.71247	1.18986e-166								g1106	-2.03453	3.02169e-118			g16805	-2.48477	4.9408e-187			g59648	-2.19904	4.25105e-248			g43057	1.17645	1.65386e-27
	g13159	-6.7312	7.67387e-168								g11793	-2.04626	6.15819e-72			g29890	-2.48534	1.37524e-98			g31148	-2.20334	3.57174e-68			g55108	1.17619	1.59526e-05
	g29224	-6.74671	4.71741e-171								g41630	-2.05012	1.50503e-108			g8948	-2.48728	8.10388e-207			g10452	-2.20577	8.6992e-133			g157	1.1753	1.45748e-26
	g38656	-6.75071	1.78754e-155								g33780	-2.05601	6.04482e-105			g8699	-2.48797	7.74193e-115			g42970	-2.20991	2.68606e-40			g50375	1.17523	6.52594e-19
	g46641	-6.76784	6.89952e-139								g13403	-2.05861	2.06353e-173			g8432	-2.48838	2.06391e-235			g41999	-2.21	3.21082e-38			g46726	1.17261	8.11148e-12
	g5401	-6.80559	2.32158e-192								g50548	-2.06453	4.16536e-145			g42735	-2.49018	8.08153e-83			g49608	-2.21105	3.27866e-125			g25815	1.17223	5.10707e-17
	g22828	-6.82763	5.2552e-223								g54350	-2.06655	0			g37944	-2.4954	0			g47081	-2.21289	3.04568e-88			g35346	1.17027	1.62556e-08
	g59746	-6.83678	1.10948e-175								g19690	-2.06997	6.88179e-126			g9051	-2.49625	7.64031e-82			g50488	-2.21381	1.12796e-57			g14150	1.16857	6.46063e-11
	g34017	-6.88838	4.00153e-265								g54710	-2.0705	1.68521e-82			g7161	-2.49648	1.30317e-141			g17905	-2.21384	3.52563e-152			g42339	1.16808	2.31212e-23
	g41061	-6.891	2.10935e-124								g4294	-2.07148	2.15813e-215			g59503	-2.49925	8.263e-110			g381	-2.21474	3.50582e-49			g59458	1.1678	2.00099e-13
	g53446	-6.89681	8.1441e-138								g1852	-2.07256	1.4839e-65			g54057	-2.49992	0			g26888	-2.21579	4.65677e-39			g61392	1.1677	1.24644e-15
	g25665	-6.90419	6.33257e-168								g12836	-2.07911	1.0083e-103			g25992	-2.50196	1.22684e-198			g54397	-2.21767	2.86298e-241			g60836	1.1673	2.2116e-10
	g57587	-6.92989	1.58831e-131								g1863	-2.08439	5.08804e-155			g3803	-2.50345	0			g13403	-2.21857	1.74301e-113			g58649	1.16719	3.61736e-24
	g13174	-6.95648	2.36188e-136								g58762	-2.09096	4.20507e-109			g61020	-2.50666	7.17813e-181			g39208	-2.22072	7.13853e-186			g41890	1.16507	1.39524e-12
	g29269	-6.95698	2.41353e-130								g497	-2.09308	3.80952e-167			g20621	-2.50712	1.60564e-196			g497	-2.22323	1.10168e-107			g46241	1.16128	1.75494e-15
	g24585	-7.05343	2.80402e-137								g23932	-2.09311	2.17677e-122			g13711	-2.50762	1.6097e-110			g32564	-2.22513	1.80098e-59			g54804	1.16079	1.22586e-05
	g63628	-7.05365	1.44777e-270								g35290	-2.10373	3.1582e-163			g53926	-2.5081	5.50896e-104			g25593	-2.22564	2.17035e-39			g9909	1.15779	4.56068e-19
	g4104	-7.08637	2.49098e-257								g29378	-2.11046	1.02048e-116			g24655	-2.51477	2.79485e-147			g867	-2.22755	4.58259e-177			g38707	1.15699	1.36309e-07
	g4547	-7.12075	9.65362e-220								g27011	-2.11084	6.7491e-87			g52527	-2.5185	0			g48811	-2.23002	1.50653e-177			g24693	1.15576	5.46275e-29
	g54917	-7.13822	2.78497e-181								g54885	-2.11193	1.84438e-180			g20614	-2.51887	4.3818e-115			g42350	-2.2322	1.28158e-53			g8286	1.15532	5.92535e-09
	g15768	-7.16374	1.03336e-180								g24978	-2.12627	7.04222e-86			g54779	-2.52266	0			g17512	-2.23786	8.01942e-52			g53292	1.15524	1.35563e-26
	g58234	-7.23345	2.74104e-138								g54109	-2.12651	1.38095e-237			g9384	-2.52292	0			g34549	-2.24193	3.65063e-286			g1040	1.15442	3.67026e-26
	g42104	-7.25147	2.37899e-131								g15497	-2.12656	9.11424e-67			g43385	-2.52633	0			g60867	-2.24414	2.07718e-71			g43039	1.1538	7.54196e-26
	g54419	-7.25797	7.0338e-186								g47081	-2.13283	1.00921e-118			g29756	-2.52715	1.82629e-87			g5271	-2.24721	3.56097e-67			g9262	1.15371	5.3243e-10
	g44995	-7.30835	1.39635e-125								g38686	-2.13926	2.97231e-79			g59979	-2.52801	0			g26780	-2.25127	1.1338e-65			g56818	1.1535	3.96483e-20
	g54875	-7.5775	8.35639e-220								g12175	-2.14177	1.13585e-106			g38365	-2.53292	7.00224e-84			g25698	-2.2532	4.12438e-70			g4006	1.15329	4.64143e-09
	g52924	-7.66511	1.35449e-257								g34549	-2.14381	0			g19548	-2.53475	1.3558e-77			g9078	-2.25499	2.18674e-202			g19665	1.15065	2.27536e-12
	g4284	-7.67696	9.22534e-172								g1634	-2.14424	5.73184e-70			g30161	-2.53809	0			g8787	-2.25723	4.62298e-64			g20813	1.15061	1.88231e-11
	g46330	-7.77149	7.41317e-148								g31082	-2.14621	4.69652e-68			g61043	-2.53823	4.9264e-135			g20723	-2.25807	2.32679e-167			g29447	1.15022	1.51584e-05
	g44927	-7.85486	3.01727e-138								g13183	-2.15051	1.24761e-89			g40891	-2.53881	5.73608e-246			g23972	-2.26408	9.50606e-52			g16769	1.14778	2.20876e-11
	g63332	-8.04042	8.62406e-128								g28548	-2.15188	4.87261e-76			g16925	-2.53923	0			g13298	-2.26564	2.87031e-53			g29445	1.14747	1.04634e-11
											g26774	-2.15298	2.04978e-236			g46681	-2.53939	2.19662e-126			g15497	-2.2699	8.51843e-46			g5538	1.1444	2.21809e-19
											g4591	-2.15448	1.21583e-93			g13324	-2.54049	2.54372e-290			g26453	-2.27055	2.593e-42			g37416	1.14325	3.21023e-19
											g63907	-2.15856	3.64586e-223			g38334	-2.54054	0			g30155	-2.2726	1.73842e-177			g60369	1.14277	4.88564e-07
											g57784	-2.16146	6.57333e-64			g25309	-2.54089	2.75464e-152			g53015	-2.27567	2.47157e-68			g9332	1.14237	1.33297e-15
											g42657	-2.16249	1.27634e-261			g57015	-2.54092	4.47584e-190			g11686	-2.27581	2.90189e-61			g60767	1.14118	2.21926e-05
											g8787	-2.1656	2.39194e-95			g24370	-2.5421	0			g11866	-2.27811	6.53286e-207			g50513	1.14062	2.47344e-09
											g38044	-2.17528	0			g25506	-2.54353	0			g60764	-2.29079	3.21194e-42			g7510	1.13948	2.87049e-18
											g10265	-2.18034	1.47149e-133			g39175	-2.55161	1.10347e-114			g24312	-2.29381	3.22763e-219			g34516	1.13838	5.66102e-10
											g60710	-2.18037	1.87415e-82			g34084	-2.55186	7.54018e-183			g15620	-2.29628	2.4155e-42			g30074	1.13759	4.86258e-11
											g60475	-2.18915	4.15979e-75			g46679	-2.55313	2.03109e-127			g4477	-2.29866	1.99587e-77			g20064	1.13736	4.98715e-14
											g61048	-2.19161	3.00295e-117			g24316	-2.55434	0			g58786	-2.30267	5.22194e-61			g373	1.13559	2.19873e-30
											g4740	-2.19258	1.30193e-98			g59925	-2.55617	8.48072e-93			g1863	-2.30706	2.21881e-118			g53040	1.13204	1.07749e-36
											g59648	-2.19652	0			g54082	-2.55769	1.54034e-287			g17223	-2.3138	4.92769e-80			g670	1.13119	1.54152e-14
											g63735	-2.20254	2.25039e-235			g19971	-2.55863	9.628e-171			g10027	-2.31864	5.69249e-185			g3410	1.12773	9.95992e-11
											g8698	-2.20282	1.51381e-66			g29965	-2.55922	0			g41630	-2.32386	1.32924e-72			g26298	1.12643	3.28269e-10
											g9018	-2.20424	5.74226e-198			g14824	-2.55944	1.50247e-163			g33573	-2.32499	1.08452e-166			g55082	1.12616	1.04135e-07
											g57145	-2.20654	6.46703e-94			g44735	-2.55982	0			g24793	-2.32593	1.27253e-105			g57652	1.12609	1.87014e-13
											g58521	-2.20825	0			g17415	-2.56056	7.94417e-95			g58915	-2.33033	4.31013e-44			g645	1.12593	1.1327e-18
											g24793	-2.20858	8.40661e-157			g28351	-2.5611	1.12733e-125			g9137	-2.33264	1.55947e-59			g50759	1.12548	2.8861e-13
											g42372	-2.20961	3.37194e-65			g54964	-2.56263	0			g43685	-2.33369	5.05942e-46			g47083	1.124	4.83929e-24
											g34019	-2.21462	2.21029e-195			g47072	-2.56815	6.26567e-90			g61048	-2.33586	1.90464e-79			g24721	1.12307	2.96534e-06
											g33573	-2.21479	6.44803e-249			g31521	-2.56963	4.38257e-83			g8831	-2.34276	4.79674e-51			g24541	1.1228	1.21275e-34
											g21517	-2.21827	3.84724e-82			g44770	-2.5697	0			g54465	-2.34407	4.44827e-167			g51019	1.12184	1.65306e-12
											g23818	-2.219	5.57506e-154			g42791	-2.57509	4.36835e-140			g1106	-2.34589	4.34265e-88			g34714	1.12169	2.79269e-18
											g13238	-2.21937	4.67846e-238			g58875	-2.57723	0			g20672	-2.34928	3.38158e-61			g38345	1.12156	1.32199e-11
											g765	-2.21959	3.33206e-87			g49612	-2.58448	6.86473e-151			g21576	-2.35008	7.23692e-99			g12152	1.12037	1.50984e-38
											g42315	-2.2217	1.86895e-163			g41108	-2.58678	9.28002e-123			g47461	-2.35568	1.04143e-146			g42775	1.11962	4.66832e-06
											g20723	-2.22192	8.38671e-257			g42350	-2.58731	2.29646e-101			g44940	-2.36507	1.12956e-77			g33860	1.11953	1.07155e-17
											g11686	-2.23944	3.4824e-85			g14702	-2.58902	2.68241e-204			g60183	-2.37033	1.82966e-259			g54970	1.11859	8.80284e-20
											g25019	-2.24428	4.69237e-75			g37389	-2.59338	0			g33990	-2.37243	1.68055e-41			g988	1.11859	1.43983e-18
											g4477	-2.25121	4.44123e-102			g16958	-2.59339	0			g4398	-2.376	2.23179e-68			g379	1.11758	7.38886e-21
											g11405	-2.25335	1.2631e-90			g32551	-2.59652	0			g44968	-2.38395	2.77311e-91			g13856	1.1166	3.32479e-12
											g60513	-2.25594	1.07075e-103			g54240	-2.59825	5.03123e-91			g47123	-2.39137	1.95192e-72			g41726	1.114	5.04173e-11
											g12819	-2.25841	4.22923e-197			g50936	-2.60334	0			g1290	-2.39293	2.20219e-70			g17023	1.11342	1.52071e-10
											g9194	-2.26094	0			g34739	-2.60626	0			g1852	-2.39601	2.18497e-49			g9776	1.11313	3.21011e-13
											g5789	-2.26199	1.08798e-264			g34533	-2.61207	1.1533e-122			g43664	-2.39786	8.8452e-297			g47189	1.11276	2.28209e-14
											g17905	-2.26458	3.60828e-234			g37393	-2.61424	0			g21517	-2.40044	4.7242e-57			g53488	1.11253	1.41273e-06
											g31189	-2.26755	2.59302e-275			g20248	-2.61535	4.43254e-199			g12245	-2.40093	1.3308e-49			g20828	1.11222	2.18732e-18
											g867	-2.2685	4.39747e-273			g59035	-2.61814	5.40153e-265			g3967	-2.401	2.70194e-257			g42999	1.1117	2.15197e-25
											g400	-2.27423	3.31605e-98			g38237	-2.61943	4.61507e-151			g55675	-2.40326	1.99063e-265			g10039	1.11102	1.10318e-55
											g54751	-2.27709	1.12555e-110			g32017	-2.62263	2.444e-179			g59505	-2.4071	1.98643e-198			g38272	1.11052	2.77525e-12
											g24592	-2.27813	1.0643e-153			g53349	-2.62379	1.58478e-208			g30850	-2.41209	6.81191e-266			g9482	1.10994	2.47081e-10
											g34209	-2.27919	3.16395e-135			g31185	-2.62421	1.66511e-153			g42372	-2.41596	1.64055e-47			g12602	1.10958	9.33403e-16
											g53064	-2.28211	8.71074e-80			g27423	-2.62545	8.45134e-87			g23668	-2.42153	7.36739e-103			g24445	1.1068	7.9532e-07
											g43076	-2.2838	1.21581e-96			g43411	-2.63156	0			g53373	-2.42168	7.3934e-264			g50814	1.10336	1.13956e-21
											g31396	-2.28464	0			g36364	-2.63214	0			g4740	-2.42198	3.73725e-76			g3663	1.09804	2.41302e-09
											g10452	-2.28498	9.34389e-191			g280	-2.63417	0			g33235	-2.4302	1.296e-108			g23363	1.0975	1.8047e-23
											g60720	-2.28599	5.69819e-91			g60730	-2.63454	0			g27011	-2.4329	3.49113e-63			g25643	1.09703	9.88724e-18
											g13298	-2.29023	7.95496e-82			g37391	-2.63464	0			g9721	-2.43377	6.48553e-92			g43168	1.09496	9.54933e-09
											g30850	-2.29443	0			g46789	-2.64021	1.1171e-280			g60789	-2.43401	4.08976e-75			g58452	1.09457	5.34833e-17
											g39231	-2.29577	4.7226e-130			g61617	-2.64045	4.3288e-94			g55047	-2.44455	2.34088e-87			g25972	1.09308	4.73912e-10
											g57671	-2.29676	3.7676e-116			g41799	-2.64093	4.47439e-247			g57145	-2.4492	1.83149e-66			g13426	1.09229	5.8291e-11
											g13128	-2.30617	3.05792e-135			g29834	-2.64502	0			g32106	-2.44975	0			g53985	1.09219	2.39316e-09
											g13303	-2.31113	5.25802e-150			g332	-2.64755	5.98924e-133			g30153	-2.45049	8.00397e-99			g42481	1.09211	1.7571e-07
											g47123	-2.32345	1.07034e-109			g400	-2.64982	1.28782e-120			g5789	-2.45437	8.30172e-187			g44128	1.09046	3.61909e-14
											g49936	-2.32813	0			g5445	-2.65066	1.33577e-258			g23055	-2.45476	8.313e-103			g50515	1.0899	3.01826e-07
											g59012	-2.32897	6.96074e-113			g62593	-2.65087	7.04132e-299			g55622	-2.45616	1.00988e-171			g2073	1.08918	1.43663e-18
											g54397	-2.338	0			g29379	-2.65097	0			g20022	-2.45625	1.38212e-297			g59761	1.08801	3.18154e-08
											g12892	-2.34786	2.07045e-269			g59775	-2.6512	0			g63877	-2.45843	2.98606e-302			g34498	1.08749	6.13844e-09
											g24312	-2.35753	0			g52268	-2.65946	1.864e-92			g60475	-2.45887	1.01587e-56			g48090	1.0874	1.24582e-24
											g31545	-2.36046	1.0661e-69			g58240	-2.6616	3.44167e-191			g4939	-2.45938	9.37122e-41			g2062	1.08495	5.90648e-16
											g43664	-2.36427	0			g55198	-2.66362	8.15404e-227			g400	-2.46222	5.86137e-70			g3683	1.08436	9.85306e-13
											g13081	-2.37314	0			g30343	-2.66406	1.45282e-90			g58036	-2.46545	2.9468e-92			g28671	1.08429	3.7439e-09
											g60183	-2.37991	0			g21290	-2.67499	2.07993e-107			g45581	-2.46648	4.0103e-49			g10196	1.08341	9.18946e-28
											g30155	-2.37996	4.56388e-277			g43775	-2.68047	1.76623e-160			g33489	-2.47562	7.57388e-253			g30549	1.08223	9.25864e-26
											g54897	-2.39102	5.83581e-106			g20189	-2.68096	1.0951e-129			g13303	-2.48061	1.80392e-106			g3514	1.08107	1.80208e-07
											g55622	-2.39473	8.99019e-252			g6895	-2.68198	0			g58521	-2.48368	1.10738e-273			g3923	1.07778	9.27024e-13
											g13592	-2.39864	0			g54359	-2.68622	0			g49009	-2.48614	3.51201e-170			g9329	1.07693	1.89856e-07
											g29200	-2.39968	9.75616e-68			g33877	-2.6888	2.98948e-158			g29890	-2.49934	2.31901e-64			g2197	1.07538	6.65558e-07
											g25257	-2.39996	0			g6017	-2.69091	7.89417e-302			g4287	-2.50099	8.43683e-184			g9042	1.07377	3.12884e-07
											g51122	-2.40206	4.14609e-135			g27199	-2.69276	1.34166e-218			g24059	-2.51403	3.4181e-71			g43697	1.07332	9.8041e-09
											g39208	-2.40304	3.23184e-302			g61406	-2.69673	1.58548e-80			g13834	-2.51477	1.71078e-275			g13769	1.07235	7.58202e-13
											g4530	-2.40763	6.61311e-127			g54857	-2.69938	6.31977e-151			g25672	-2.51956	4.31718e-100			g29439	1.07009	1.40363e-20
											g20672	-2.41078	1.27211e-95			g21513	-2.69995	0			g4365	-2.52146	6.73836e-50			g184	1.07008	1.93764e-38
											g50602	-2.41376	9.00611e-83			g33901	-2.70639	6.91847e-238			g43076	-2.52356	1.19944e-68			g5557	1.06934	6.04359e-12
											g20715	-2.41383	0			g7995	-2.71274	0			g12892	-2.52384	5.33379e-198			g45144	1.06817	6.82239e-06
											g20702	-2.41425	1.01346e-97			g62112	-2.71581	5.99026e-167			g54710	-2.52437	2.60897e-57			g30333	1.0677	2.22641e-27
											g9051	-2.42409	3.80538e-80			g62017	-2.72081	0			g13081	-2.52524	9.67731e-261			g26056	1.06661	1.2127e-05
											g61672	-2.42609	1.55878e-231			g61812	-2.73039	6.39455e-268			g1634	-2.52908	4.00375e-51			g37674	1.065	1.54304e-08
											g56269	-2.42694	6.93937e-146			g54340	-2.7347	0			g18506	-2.52945	3.41918e-153			g38849	1.06421	1.38058e-17
											g43150	-2.42759	3.25333e-237			g42071	-2.73578	1.23342e-144			g33582	-2.53139	3.0243e-106			g25778	1.06357	3.57574e-06
											g43435	-2.43188	6.0192e-126			g17749	-2.75353	2.73083e-140			g4591	-2.53231	2.77136e-64			g47769	1.06349	3.67934e-19
											g60170	-2.43615	4.38747e-92			g20149	-2.75969	0			g50511	-2.533	4.80261e-118			g20020	1.06237	1.0166e-29
											g24063	-2.43787	0			g25380	-2.76541	2.0133e-275			g39231	-2.53541	4.51654e-94			g30197	1.06098	4.26742e-10
											g59502	-2.4392	2.01755e-112			g12473	-2.76711	1.48849e-90			g49063	-2.53549	4.50088e-91			g51980	1.06086	1.32081e-12
											g11866	-2.43965	0			g48503	-2.76803	1.79133e-95			g28261	-2.54304	8.47263e-186			g46355	1.06077	2.51101e-38
											g42751	-2.44028	1.37137e-95			g58873	-2.77246	1.74007e-92			g416	-2.54477	2.6019e-269			g35472	1.06072	1.36889e-28
											g60543	-2.44371	6.84517e-170			g25541	-2.77282	3.29999e-243			g60246	-2.54764	1.74516e-100			g1315	1.06064	5.50168e-07
											g47461	-2.44867	5.53615e-229			g876	-2.77283	5.61289e-130			g33567	-2.55174	1.20531e-191			g8788	1.06054	1.33036e-13
											g24977	-2.4498	0			g1822	-2.7776	1.25242e-194			g29334	-2.56043	1.60492e-82			g57577	1.05939	3.09459e-35
											g7690	-2.46192	2.09391e-111			g46802	-2.78081	3.81898e-296			g43435	-2.56172	4.13602e-93			g29589	1.05857	6.17384e-08
											g31496	-2.46669	2.34041e-141			g43386	-2.78184	3.56555e-216			g60170	-2.56424	3.07292e-59			g42817	1.05813	8.81385e-21
											g60499	-2.47161	0			g9416	-2.79948	9.99967e-194			g20458	-2.56862	5.28665e-187			g12855	1.05755	5.40196e-09
											g50488	-2.48079	4.717e-84			g60411	-2.81545	9.09317e-194			g16295	-2.57099	1.02498e-113			g24456	1.05248	2.91828e-12
											g17512	-2.48397	3.37114e-77			g7690	-2.82829	1.95798e-145			g48682	-2.57307	1.79889e-112			g25469	1.05021	9.43846e-23
											g23972	-2.49083	3.43537e-80			g1123	-2.83107	1.51586e-84			g61239	-2.57405	2.46733e-208			g64127	1.04887	5.53401e-12
											g26780	-2.49588	4.20247e-111			g46357	-2.83542	2.52698e-116			g24063	-2.57817	5.52726e-240			g58519	1.04815	6.19735e-26
											g24059	-2.49686	3.9991e-109			g38995	-2.83922	3.70566e-219			g60499	-2.57818	1.11622e-238			g823	1.048	4.12183e-06
											g9078	-2.50648	0			g7950	-2.85313	0			g59719	-2.57921	1.64845e-264			g38594	1.04788	3.6015e-28
											g53373	-2.50747	0			g7958	-2.85713	0			g54897	-2.5834	1.2083e-72			g30705	1.04593	3.62782e-08
											g49612	-2.50787	1.97096e-145			g21016	-2.86645	4.94993e-153			g31592	-2.58466	2.81276e-228			g3602	1.04484	1.23251e-09
											g5118	-2.50906	4.90673e-301			g25466	-2.87024	3.64534e-101			g9993	-2.58668	5.1275e-76			g31325	1.04156	1.32908e-06
											g20022	-2.51329	0			g19902	-2.87489	6.55962e-97			g50500	-2.58881	8.3688e-298			g12408	1.04145	1.33142e-11
											g30153	-2.51799	3.07534e-141			g50214	-2.87537	1.36965e-230			g9347	-2.58895	6.42504e-249			g50947	1.04001	1.73078e-10
											g8948	-2.51951	5.91458e-186			g573	-2.89561	1.14065e-106			g38365	-2.59075	6.03182e-61			g431	1.03984	3.31983e-11
											g5271	-2.52177	2.68709e-111			g55	-2.90148	1.32446e-115			g29483	-2.59952	9.83169e-117			g60525	1.03956	8.39498e-08
											g19337	-2.52197	1.66014e-137			g16874	-2.91207	4.55637e-92			g42642	-2.60012	1.22943e-198			g13593	1.03918	1.0907e-08
											g55675	-2.52597	0			g31490	-2.91587	3.65332e-121			g8948	-2.60017	8.1566e-134			g43333	1.03914	8.10592e-11
											g59505	-2.52951	1.14041e-303			g14093	-2.93608	4.16057e-195			g59012	-2.60083	3.48455e-81			g47854	1.03735	2.54544e-10
											g28351	-2.53069	2.2366e-122			g8743	-2.95385	8.86728e-128			g9051	-2.60169	1.8977e-52			g26747	1.03639	8.60842e-15
											g54465	-2.53133	1.84678e-251			g55222	-2.95977	2.13361e-119			g13128	-2.6042	4.53465e-104			g4533	1.0361	7.64593e-37
											g43049	-2.54956	1.82298e-117			g16912	-2.9653	1.68966e-131			g1605	-2.60525	8.27737e-45			g34494	1.03322	2.06489e-07
											g32106	-2.55504	0			g24994	-2.96924	8.75403e-165			g35016	-2.60923	4.47242e-214			g24677	1.03286	7.6677e-15
											g43774	-2.55594	0			g21004	-3.01618	0			g50581	-2.60932	0			g34484	1.03167	3.80966e-17
											g29483	-2.55822	4.03304e-168			g37883	-3.05369	5.80821e-89			g61672	-2.60981	2.20605e-160			g55202	1.03117	6.75583e-10
											g1290	-2.56172	1.25249e-105			g12656	-3.0785	7.00224e-154			g1172	-2.6105	0			g29486	1.03073	4.51722e-17
											g60789	-2.5626	1.25204e-116			g26218	-3.11417	9.8169e-103			g3987	-2.62149	1.00383e-186			g35117	1.03072	1.0422e-09
											g9347	-2.56396	0			g50517	-3.16071	7.84746e-95			g9185	-2.62337	5.59747e-103			g56140	1.03005	3.32648e-12
											g25672	-2.56829	5.57539e-154			g38154	-3.21537	4.7533e-116			g43774	-2.62557	2.20539e-264			g41738	1.02901	1.36192e-08
											g29334	-2.5703	6.18312e-113			g2195	-3.2637	1.02084e-80			g20189	-2.63163	1.05003e-81			g47213	1.02783	4.92909e-20
											g43959	-2.57634	2.74651e-148								g24977	-2.63325	0			g155	1.02711	4.80478e-23
											g5240	-2.57797	0								g52228	-2.63544	1.66185e-82			g42082	1.02574	7.31318e-33
											g9185	-2.58128	4.78229e-141								g59502	-2.63572	2.97805e-81			g59382	1.02571	1.3195e-07
											g10534	-2.58362	0								g35236	-2.63889	1.30109e-72			g31730	1.02432	3.14773e-07
											g54240	-2.59026	9.42554e-80								g28351	-2.64016	9.75906e-90			g24812	1.02177	3.37555e-16
											g63877	-2.59071	0								g21844	-2.645	1.81349e-210			g53982	1.0211	1.46064e-05
											g4398	-2.5908	6.45595e-104								g10534	-2.64892	6.83085e-211			g12294	1.02012	2.09314e-12
											g31592	-2.59197	0								g31496	-2.65146	1.09893e-98			g46515	1.01936	2.95093e-07
											g53015	-2.59291	2.57224e-111								g60720	-2.65161	3.66897e-68			g38851	1.01819	8.03742e-06
											g20189	-2.5987	5.24127e-116								g41625	-2.6571	1.52377e-199			g4913	1.01627	2.11798e-20
											g33489	-2.60134	0								g21739	-2.65996	1.4986e-218			g61121	1.01537	2.22981e-23
											g51349	-2.60155	5.8633e-168								g20358	-2.66108	1.25326e-285			g30603	1.01448	1.36964e-19
											g38436	-2.60481	2.44603e-152								g21133	-2.66204	1.57928e-233			g59363	1.01435	2.35635e-07
											g55787	-2.60603	4.32748e-97								g51349	-2.66506	4.08267e-109			g40930	1.01431	7.82781e-15
											g49009	-2.60723	7.94871e-258								g46545	-2.66855	6.4147e-232			g307	1.01367	9.16815e-11
											g60445	-2.60869	5.07488e-217								g42876	-2.66931	0			g4369	1.01129	2.87386e-07
											g5003	-2.61438	4.93583e-121								g60445	-2.66972	2.67248e-148			g28080	1.01113	4.95297e-19
											g20623	-2.61551	1.302e-165								g252	-2.66987	2.89758e-251			g46449	1.0094	8.86813e-22
											g31384	-2.61661	1.65322e-171								g50296	-2.67591	6.52898e-88			g9000	1.00929	6.22936e-13
											g50581	-2.61667	0								g43150	-2.67807	6.97983e-175			g17064	1.00708	2.8688e-06
											g46227	-2.62054	1.71768e-296								g50447	-2.6796	4.40426e-266			g13255	1.00623	0.065012
											g18506	-2.6312	1.4636e-229								g9445	-2.67982	5.78912e-178			g8733	1.0048	1.49856e-20
											g33567	-2.63241	8.85428e-291								g54751	-2.68079	2.65183e-83			g31265	1.00416	3.42259e-13
											g1172	-2.63381	0								g20702	-2.68488	4.41943e-70			g61336	1.00388	5.79175e-36
											g416	-2.63765	0								g52761	-2.68589	1.79216e-115			g34544	1.0015	0.000982681
											g10027	-2.63921	0								g62	-2.68955	1.3089e-285			g8240	1.00119	1.27577e-06
											g48811	-2.64493	2.20942e-297								g58982	-2.68964	0			g46594	1.00117	6.74632e-07
											g17223	-2.64753	7.6e-120								g60272	-2.69003	6.93782e-275			g47077	-1.0003	0.00137387
											g3967	-2.64811	0								g12843	-2.69125	9.61801e-168			g63063	-1.00103	0.0428738
											g24401	-2.65116	7.38058e-215								g37937	-2.6919	3.44981e-281			g38186	-1.00111	0.00311047
											g38359	-2.65148	2.68224e-151								g30015	-2.69193	1.39775e-77			g41062	-1.00424	7.9078e-06
											g13123	-2.65588	1.92394e-122								g46227	-2.6929	3.67422e-194			g55664	-1.00705	0.368309
											g60246	-2.6601	9.99646e-152								g9963	-2.69527	7.6035e-194			g30211	-1.0135	1
											g62201	-2.66068	2.50475e-112								g11405	-2.69671	4.93441e-71			g25374	-1.01356	0.000355386
											g26015	-2.66516	4.39618e-78								g47140	-2.69794	4.03126e-262			g48009	-1.01518	1.7451e-11
											g13834	-2.66548	0								g31082	-2.70501	2.14767e-52			g25663	-1.01981	3.26893e-06
											g252	-2.66557	0								g4086	-2.70919	1.12962e-87			g16914	-1.02002	8.56983e-18
											g4086	-2.66817	2.66983e-138								g31397	-2.71011	0			g525	-1.02136	0.119961
											g33582	-2.67326	7.81074e-165								g6382	-2.71551	1.70009e-274			g55231	-1.0319	0.230847
											g60747	-2.68222	6.59402e-95								g23739	-2.7162	7.53624e-242			g35206	-1.04325	0.000147261
											g15620	-2.68398	5.81728e-71								g5003	-2.71739	6.08512e-92			g60735	-1.04347	0.0279819
											g4630	-2.68569	0								g42735	-2.71749	3.5282e-52			g23827	-1.04392	1
											g55047	-2.68947	1.04832e-136								g13155	-2.71814	7.7541e-84			g14242	-1.0458	0.0687907
											g52957	-2.69091	9.44092e-83								g13123	-2.71878	1.41046e-86			g54022	-1.04669	6.53077e-07
											g35362	-2.69315	0								g64072	-2.71884	3.29893e-277			g47408	-1.04844	1.50032e-14
											g24655	-2.70169	6.08131e-144								g19337	-2.72337	5.14768e-88			g60270	-1.05098	1.02162e-07
											g37937	-2.70445	0								g1169	-2.72407	9.63617e-235			g42000	-1.0515	0.00164561
											g4287	-2.70567	1.38693e-274								g20810	-2.72828	0			g13529	-1.05274	4.7853e-05
											g60867	-2.71075	2.58424e-100								g30995	-2.72954	6.74525e-169			g21652	-1.05837	0.0666968
											g16295	-2.71445	1.05165e-171								g7151	-2.74075	1.88812e-236			g45455	-1.0635	1.192e-13
											g35016	-2.71511	0								g62201	-2.74451	8.47014e-83			g54026	-1.06556	3.42172e-26
											g9963	-2.71667	2.48763e-280								g24342	-2.7453	1.73372e-48			g54019	-1.07029	0.112596
											g28261	-2.71671	9.11551e-277								g38436	-2.74555	1.34097e-106			g13467	-1.07449	0.151302
											g20358	-2.71704	0								g54429	-2.74559	5.20565e-204			g29095	-1.07491	0.000482126
											g58036	-2.71856	6.04111e-139								g28548	-2.74656	6.51935e-64			g8744	-1.07531	0.307337
											g59719	-2.72029	0								g7161	-2.74694	3.26846e-92			g59698	-1.07892	0.768244
											g16874	-2.72132	2.26573e-87								g53244	-2.74848	6.58518e-280			g21530	-1.07938	4.66426e-13
											g42084	-2.72778	0								g48926	-2.75174	9.84513e-298			g7537	-1.07939	0.100874
											g48682	-2.72785	9.30521e-167								g5752	-2.75227	8.23886e-238			g21709	-1.08135	0.00161235
											g20458	-2.72838	0								g26015	-2.75502	1.8253e-52			g59329	-1.08483	0.0047324
											g50447	-2.73079	0								g13219	-2.76015	6.98176e-136			g38752	-1.08638	1
											g1281	-2.73517	9.4628e-87								g24592	-2.76352	6.84194e-116			g5281	-1.08652	1.31357e-14
											g20621	-2.73797	1.75991e-179								g31194	-2.76495	1.26874e-73			g48574	-1.09234	0.00988959
											g9445	-2.7447	1.67963e-259								g4630	-2.76599	2.15992e-226			g46798	-1.0924	0.0103851
											g50511	-2.74638	1.67878e-181								g54240	-2.77103	7.70706e-61			g20781	-1.09721	0.0683787
											g41625	-2.74702	0								g24401	-2.77891	6.65039e-145			g3865	-1.10742	0.000181195
											g1169	-2.74768	0								g1281	-2.77914	4.76884e-60			g15981	-1.11021	3.65857e-08
											g25698	-2.74801	8.47574e-114								g64064	-2.781	1.0928e-276			g29835	-1.1123	3.00292e-08
											g52761	-2.7493	1.6157e-181								g49962	-2.78186	1.07948e-58			g19012	-1.11345	1
											g8699	-2.75103	1.26522e-107								g19479	-2.7891	2.60362e-247			g12846	-1.11402	1.14117e-19
											g42645	-2.75124	0								g21284	-2.78923	8.30234e-70			g10329	-1.11535	5.50915e-13
											g34710	-2.75161	5.60357e-90								g52957	-2.78936	1.76814e-52			g63054	-1.11583	5.43666e-06
											g46802	-2.7563	1.84587e-259								g13564	-2.7913	0			g43328	-1.11815	0.16754
											g21133	-2.75754	0								g43959	-2.79281	4.25728e-103			g55112	-1.1204	1.12798e-07
											g26761	-2.76498	2.39917e-243								g42084	-2.79369	2.21464e-257			g12278	-1.12261	0.000282435
											g9821	-2.76873	7.73731e-158								g24655	-2.79571	2.24705e-94			g59758	-1.12338	1
											g34449	-2.76974	0								g31521	-2.79883	6.09037e-52			g8418	-1.12843	2.63489e-07
											g6382	-2.77078	0								g20621	-2.80196	1.66665e-133			g603	-1.12891	1
											g3987	-2.77155	2.42342e-302								g39165	-2.80894	2.9092e-230			g38646	-1.12923	0.000319318
											g13324	-2.77174	1.9014e-280								g43460	-2.80925	1.20555e-249			g34065	-1.12923	0.154145
											g12843	-2.77416	1.87634e-256								g58673	-2.81044	3.42021e-292			g59969	-1.13177	0.00110154
											g50425	-2.77671	3.06869e-294								g32176	-2.81271	4.26116e-187			g34109	-1.1327	0.959621
											g21557	-2.77824	0								g2456	-2.81632	3.29605e-221			g34745	-1.13504	0.057896
											g21739	-2.77854	0								g38359	-2.81858	1.09264e-108			g8934	-1.13613	0.368744
											g9137	-2.78248	8.3761e-93								g5240	-2.81859	1.51205e-291			g60	-1.1365	2.70454e-06
											g9993	-2.78505	1.02668e-117								g24433	-2.81962	6.32929e-185			g49068	-1.1369	0.0153271
											g59328	-2.78695	0								g17481	-2.82443	1.22849e-78			g13510	-1.13717	0.000164183
											g31397	-2.78979	0								g333	-2.82799	8.82865e-268			g43199	-1.14118	0.11854
											g53244	-2.79054	0								g5118	-2.83058	1.53027e-216			g34211	-1.14162	1
											g19770	-2.79166	0								g34449	-2.83272	0			g51024	-1.14471	6.17653e-21
											g60272	-2.79578	0								g39004	-2.83499	3.27045e-238			g32018	-1.14507	7.16501e-31
											g13564	-2.79583	0								g42751	-2.8368	3.74536e-70			g29206	-1.14587	1
											g33458	-2.79625	3.91602e-149								g31104	-2.83869	4.89375e-175			g54894	-1.14828	0.1394
											g21576	-2.79628	8.90774e-162								g35037	-2.83927	8.97834e-97			g4731	-1.14988	0.0302206
											g35227	-2.8012	1.42446e-94								g35004	-2.84264	3.83097e-138			g4773	-1.1502	1.41155e-18
											g17459	-2.80992	3.1821e-245								g34447	-2.84674	9.14491e-134			g582	-1.15022	3.4174e-05
											g49962	-2.81104	5.85293e-88								g33402	-2.84816	5.60667e-96			g13518	-1.15137	0.917934
											g42876	-2.81744	0								g332	-2.84889	1.21173e-92			g35034	-1.15228	1.55153e-18
											g9721	-2.81988	4.37522e-153								g9751	-2.85125	4.7186e-283			g59403	-1.15271	3.15049e-10
											g29890	-2.82149	1.03558e-100								g15362	-2.8529	2.62752e-51			g17275	-1.15286	0.00129783
											g33235	-2.82857	1.8348e-174								g45761	-2.85654	0			g25471	-1.1534	3.39317e-36
											g45581	-2.83293	1.70141e-78								g19770	-2.85693	7.22959e-213			g42543	-1.1578	1.45231e-15
											g58982	-2.83301	0								g33458	-2.85812	4.99993e-98			g24340	-1.16481	0.00419903
											g23055	-2.8338	4.61235e-157								g59328	-2.86135	3.65133e-249			g50232	-1.16558	0.149433
											g50500	-2.83392	0								g23981	-2.87362	7.67215e-118			g13073	-1.16741	0.00216721
											g46545	-2.83611	0								g42645	-2.88151	1.02062e-207			g34015	-1.17288	0.33474
											g21844	-2.83742	0								g31548	-2.89006	3.1426e-55			g48975	-1.17583	8.28868e-16
											g64064	-2.83832	0								g34283	-2.89057	0			g282	-1.17631	4.35855e-05
											g48926	-2.83859	0								g9821	-2.89247	2.39302e-109			g60929	-1.17768	0.0621227
											g43460	-2.84122	0								g54857	-2.89372	1.67763e-104			g23414	-1.17813	4.07855e-21
											g54429	-2.84128	0								g34533	-2.89504	1.09803e-81			g44482	-1.17839	1.24376e-14
											g50296	-2.84241	1.06901e-137								g21016	-2.89779	4.43711e-104			g58187	-1.1807	0.0393416
											g49063	-2.84516	7.37175e-150								g13945	-2.8981	4.61437e-54			g59727	-1.18113	0.0109568
											g9989	-2.84645	0								g38237	-2.90433	1.84178e-103			g16904	-1.18134	1.40475e-18
											g47140	-2.84876	0								g53721	-2.90549	2.19008e-187			g26962	-1.18446	0.0911309
											g23668	-2.85649	2.49168e-162								g35073	-2.91067	2.70969e-95			g1306	-1.18749	1.99563e-06
											g7151	-2.85726	0								g43118	-2.91281	5.90079e-244			g46708	-1.19039	0.050603
											g45761	-2.85881	0								g8699	-2.91978	2.69163e-81			g30458	-1.19339	3.4993e-23
											g59925	-2.86291	1.80612e-83								g53926	-2.92177	3.14599e-67			g20592	-1.19353	4.12038e-34
											g59093	-2.87079	0								g17459	-2.93421	3.40077e-169			g61339	-1.19365	4.47528e-42
											g5752	-2.87736	0								g7125	-2.93554	4.00553e-245			g25732	-1.19376	0.00293296
											g31548	-2.87796	1.09916e-80								g42791	-2.93823	6.03634e-94			g12200	-1.19443	0.0665342
											g35037	-2.87809	1.05623e-135								g37944	-2.93932	0			g43091	-1.19558	5.38224e-26
											g35004	-2.88022	1.56849e-202								g1705	-2.94052	1.24225e-61			g30366	-1.19587	0.000358506
											g33877	-2.88059	2.85244e-146								g58267	-2.94107	1.62187e-116			g42827	-1.19837	0.169312
											g23739	-2.88267	0								g21557	-2.94259	2.88823e-264			g10413	-1.19942	0.000880333
											g30317	-2.88525	7.21234e-104								g59979	-2.94373	0			g31269	-1.20703	0.00490024
											g34084	-2.88641	7.77512e-172								g16805	-2.94419	4.68803e-125			g47457	-1.20803	7.60864e-15
											g2456	-2.88776	0								g55677	-2.94431	1.04613e-97			g54437	-1.21176	2.24013e-06
											g333	-2.88965	0								g49612	-2.94468	4.73164e-99			g34489	-1.21253	0.0761895
											g17749	-2.89101	6.27829e-134								g33528	-2.94497	1.02817e-50			g36102	-1.21543	4.10456e-05
											g9751	-2.89278	0								g60747	-2.94531	2.03042e-64			g59165	-1.21886	1.54162e-09
											g61239	-2.89357	0								g7690	-2.95168	2.61858e-92			g46750	-1.2233	5.78192e-12
											g58673	-2.89411	0								g7173	-2.95248	0			g43261	-1.2241	0.82405
											g21016	-2.8942	4.27175e-143								g5341	-2.95693	0			g30392	-1.2265	0.239551
											g34283	-2.89564	0								g26136	-2.95926	9.64078e-177			g30695	-1.22868	8.02587e-07
											g62	-2.89712	0								g29965	-2.96011	0			g30524	-1.22926	1.82263e-22
											g30995	-2.8994	5.69993e-272								g50425	-2.96588	2.5943e-209			g50555	-1.23048	4.37903e-29
											g20810	-2.90609	0								g60257	-2.9685	3.29182e-271			g59882	-1.23198	8.97193e-05
											g64072	-2.91219	0								g53218	-2.9695	3.19918e-109			g46295	-1.23205	5.31226e-07
											g42642	-2.91227	0								g61406	-2.96958	9.59738e-57			g38548	-1.23783	5.376e-20
											g20248	-2.91352	6.04719e-204								g444	-2.97022	2.61097e-68			g4758	-1.23988	6.74561e-36
											g16912	-2.91404	1.00571e-122								g4159	-2.97258	9.07493e-119			g26660	-1.24163	6.10026e-09
											g31521	-2.92079	2.57904e-83								g13324	-2.97535	2.27867e-196			g60064	-1.24168	4.29243e-18
											g52268	-2.92148	2.01346e-94								g3899	-2.97859	5.52718e-70			g34136	-1.24359	1.78446e-29
											g3899	-2.92638	8.94038e-105								g59035	-2.97906	4.14846e-173			g13371	-1.24505	1.03824e-08
											g13219	-2.92875	1.98986e-204								g24370	-2.98099	1.22524e-271			g9483	-1.24597	0.000412981
											g19479	-2.92941	0								g54057	-2.98453	6.82056e-281			g11688	-1.24664	0.149857
											g332	-2.92949	2.60257e-130								g17181	-2.98474	1.29643e-85			g8923	-1.24855	5.20608e-07
											g7173	-2.93083	0								g9989	-2.98809	1.46457e-278			g54126	-1.24928	0.000455816
											g53218	-2.9326	6.60175e-158								g35362	-2.99218	1.24672e-273			g30105	-1.25029	0.00789426
											g5341	-2.93327	0								g46681	-2.99229	1.16976e-84			g11269	-1.25291	3.23086e-35
											g35236	-2.94495	8.6304e-112								g20614	-2.99541	2.06135e-84			g15906	-1.25334	5.58825e-13
											g21290	-2.94594	7.00705e-109								g42071	-2.99878	1.84552e-92			g43387	-1.2576	1
											g59979	-2.95673	0								g8432	-3.00449	4.36703e-157			g40876	-1.25838	3.71821e-13
											g37944	-2.96062	0								g35227	-3.0064	1.73784e-71			g48959	-1.26673	1.12723e-06
											g16805	-2.96207	2.33896e-189								g17947	-3.00756	0			g26463	-1.26697	2.53654e-08
											g25506	-2.98116	0								g25506	-3.00842	1.03246e-229			g14103	-1.26907	7.72281e-17
											g61617	-2.98133	4.34635e-95								g26761	-3.00889	5.37344e-179			g61184	-1.27129	1.75895e-05
											g7125	-2.9821	0								g9384	-3.02299	0			g880	-1.27883	3.10718e-15
											g54057	-2.98627	0								g58875	-3.02306	0			g31105	-1.28418	0.0851061
											g34533	-2.98737	7.89042e-120								g59093	-3.02559	0			g46870	-1.28503	2.08176e-07
											g38365	-2.98966	2.67458e-83								g39175	-3.03713	4.37153e-86			g10185	-1.28882	1.98024e-15
											g50517	-2.99373	3.00958e-87								g43385	-3.0391	0			g45186	-1.29167	5.35791e-15
											g33402	-2.99607	1.20103e-147								g9736	-3.04026	0			g8758	-1.29321	1.6551e-27
											g39165	-3.00027	0								g54779	-3.04052	0			g9817	-1.29527	1.66075e-06
											g60411	-3.00094	1.21514e-180								g44770	-3.04071	0			g47073	-1.29542	0.0976386
											g42735	-3.00225	1.53305e-76								g52527	-3.04379	1.59894e-287			g17087	-1.29758	1.88064e-10
											g17947	-3.00382	0								g61561	-3.05026	0			g14520	-1.30021	4.93395e-08
											g9384	-3.02434	0								g24994	-3.0515	2.38815e-108			g26162	-1.30142	0.00154481
											g25992	-3.02728	1.14943e-196								g47266	-3.05181	1.28736e-50			g61805	-1.30334	0.0584867
											g29965	-3.02978	0								g25992	-3.05494	1.5646e-139			g34949	-1.30372	0.0010229
											g41108	-3.03128	1.75585e-122								g34084	-3.06853	2.41653e-116			g6111	-1.3038	0.000521099
											g39004	-3.03516	0								g29134	-3.07138	2.22709e-226			g29362	-1.30493	0.0643007
											g444	-3.03592	3.61387e-104								g25309	-3.07627	3.04763e-106			g33698	-1.30576	1.86185e-07
											g55677	-3.03817	2.40346e-137								g16958	-3.08031	3.5321e-301			g59030	-1.30661	0.000544629
											g31104	-3.03846	8.45389e-277								g58240	-3.08568	2.84078e-129			g42542	-1.30713	1
											g297	-3.03862	0								g33901	-3.08786	1.58526e-155			g43233	-1.30719	5.73985e-13
											g43118	-3.04413	0								g34206	-3.08842	6.37007e-252			g63984	-1.30778	4.60714e-05
											g24994	-3.04443	1.58051e-150								g54964	-3.09128	0			g31148	-1.31396	0.00137119
											g58875	-3.04739	0								g61020	-3.0963	3.15307e-124			g55620	-1.31547	2.73653e-13
											g9736	-3.05199	0								g60411	-3.09735	1.2491e-123			g34901	-1.31609	0.000677481
											g26136	-3.05243	6.81204e-267								g49933	-3.10662	8.49266e-222			g34217	-1.3175	9.26248e-06
											g34447	-3.05265	1.43838e-205								g14702	-3.10682	1.66643e-145			g43167	-1.31802	2.24401e-08
											g31194	-3.07125	1.29325e-104								g54082	-3.11205	3.94198e-194			g41984	-1.31838	2.7287e-11
											g49608	-3.07287	1.20389e-239								g30317	-3.11261	4.65897e-75			g25117	-1.32176	3.06663e-15
											g7161	-3.08135	1.49564e-137								g16925	-3.11306	2.0879e-297			g25607	-1.32184	0.0676286
											g60257	-3.08184	0								g38334	-3.11731	0			g47774	-1.32341	0.0240427
											g30343	-3.08574	1.00998e-88								g16874	-3.11783	4.02857e-63			g30590	-1.32617	4.2628e-37
											g876	-3.0897	3.33124e-125								g30161	-3.11892	0			g4934	-1.32645	9.04321e-05
											g58873	-3.09483	1.36898e-87								g29834	-3.12501	3.99339e-297			g34307	-1.32786	2.54335e-09
											g21284	-3.09741	2.98549e-102								g17749	-3.12559	1.13108e-91			g57772	-1.32967	0.0612957
											g32176	-3.09893	6.84359e-292								g297	-3.12667	8.06543e-264			g20409	-1.33137	7.54835e-25
											g32017	-3.1026	1.54832e-181								g54681	-3.12826	1.72264e-117			g12851	-1.33433	0.00229298
											g54964	-3.1036	0								g32551	-3.13036	0			g11899	-1.33873	9.44003e-12
											g17181	-3.10558	1.56228e-125								g20149	-3.1316	7.6049e-205			g20638	-1.34065	1.07922e-09
											g26218	-3.1063	2.42304e-92								g16912	-3.13371	1.80514e-89			g31678	-1.34088	8.90068e-14
											g24370	-3.10797	0								g37389	-3.14014	0			g5403	-1.34151	2.75451e-06
											g37389	-3.11885	0								g33877	-3.15319	1.77336e-109			g33466	-1.34161	6.03314e-05
											g58240	-3.12099	7.66059e-191								g48023	-3.16464	1.58779e-51			g4486	-1.34517	4.91064e-29
											g35073	-3.12103	2.93243e-146								g55198	-3.16543	3.38755e-158			g43338	-1.34735	0.00672582
											g14824	-3.12362	5.13328e-162								g59503	-3.17763	8.38219e-72			g35437	-1.34936	0.0196158
											g20149	-3.12403	0								g21290	-3.18172	2.83875e-83			g54005	-1.34968	1.73266e-08
											g54779	-3.12589	0								g57015	-3.18884	1.28775e-141			g4285	-1.34969	0.0881893
											g49933	-3.12639	0								g52268	-3.19925	6.62851e-67			g2432	-1.35019	1.02053e-13
											g52228	-3.12884	1.35056e-117								g31185	-3.19948	1.07743e-102			g55615	-1.35053	8.05137e-07
											g40891	-3.12922	1.98002e-249								g36358	-3.19996	1.91446e-130			g55297	-1.35163	7.21639e-10
											g13945	-3.12936	3.52633e-82								g280	-3.20153	0			g36587	-1.35183	4.97648e-07
											g24433	-3.13205	2.87492e-283								g61043	-3.20271	3.32819e-96			g59431	-1.35235	0.0248464
											g53721	-3.13223	1.73129e-294								g46802	-3.20886	9.04542e-193			g20236	-1.35251	5.81752e-28
											g36364	-3.14654	0								g43411	-3.21092	0			g16882	-1.35308	3.63943e-32
											g44770	-3.14783	0								g24316	-3.21242	0			g9476	-1.35316	3.20318e-12
											g280	-3.16035	0								g61617	-3.21867	7.32937e-68			g8787	-1.35482	0.00729627
											g13155	-3.16048	2.34552e-136								g42837	-3.21901	2.24736e-274			g14515	-1.35588	0.00906562
											g30015	-3.1761	1.17421e-109								g58873	-3.21967	3.38911e-67			g51746	-1.35839	0.00221149
											g39175	-3.17676	1.73821e-117								g62112	-3.2266	6.14949e-113			g46517	-1.36033	2.29112e-34
											g59503	-3.17869	4.67887e-103								g3803	-3.22729	1.92322e-248			g357	-1.36056	1.64964e-07
											g43385	-3.17922	0								g46679	-3.23023	3.11414e-95			g23932	-1.36131	1.39668e-05
											g60730	-3.18273	0								g37391	-3.2346	7.6662e-294			g39040	-1.36195	0.000451106
											g37391	-3.18397	0								g44735	-3.23643	4.89773e-297			g58376	-1.36277	5.14848e-08
											g43386	-3.19219	8.08708e-212								g37393	-3.24431	0			g11311	-1.36484	9.08422e-08
											g54359	-3.19409	0								g41799	-3.24524	6.4312e-179			g50405	-1.36487	5.54478e-32
											g27199	-3.19487	2.78362e-217								g34739	-3.2469	0			g3840	-1.36522	5.43521e-32
											g42791	-3.19529	4.16335e-141								g36364	-3.24957	2.31274e-238			g30531	-1.36727	3.85846e-21
											g57015	-3.20041	2.22184e-199								g54359	-3.25393	1.85868e-232			g53880	-1.37328	0.00152202
											g8432	-3.20063	2.01964e-241								g60730	-3.25414	4.97012e-279			g8786	-1.37575	0.00557609
											g37393	-3.20073	0								g62593	-3.25438	2.36915e-210			g13123	-1.37876	3.74894e-05
											g1094	-3.20521	1.6625e-104								g59775	-3.25707	0			g61253	-1.38146	1.03519e-05
											g8743	-3.20778	1.01758e-120								g50936	-3.26149	0			g49940	-1.38159	0.00197493
											g32551	-3.21404	0								g48503	-3.26585	2.06682e-69			g12888	-1.38265	7.25793e-14
											g44735	-3.21564	0								g12473	-3.26782	6.3857e-69			g400	-1.38994	0.0332572
											g42837	-3.21743	0								g6895	-3.26903	8.24459e-252			g20603	-1.39098	0.018531
											g34739	-3.21893	0								g14824	-3.27655	6.70406e-115			g4765	-1.3913	5.85521e-45
											g61406	-3.22091	1.42207e-81								g30343	-3.28575	3.02335e-66			g5266	-1.39337	1.44145e-27
											g52527	-3.23275	0								g40891	-3.29129	2.13859e-167			g33345	-1.39409	0.00216725
											g61561	-3.2347	0								g29379	-3.29244	0			g13478	-1.39479	1.1802e-25
											g7958	-3.23801	0								g19971	-3.29865	9.73885e-114			g32950	-1.39654	9.83135e-05
											g29134	-3.23867	0								g43386	-3.30751	3.88754e-145			g25099	-1.39751	0.000158744
											g38237	-3.23897	4.91925e-152								g41108	-3.31139	3.6746e-91			g60865	-1.40142	5.13509e-46
											g1705	-3.23981	1.07509e-92								g49871	-3.31765	0			g42630	-1.40356	3.03703e-42
											g1822	-3.24294	1.71981e-186								g41083	-3.3187	8.0073e-118			g5120	-1.40364	1.02801e-16
											g38154	-3.24407	1.97747e-108								g54340	-3.32173	0			g55338	-1.40491	3.46499e-12
											g27423	-3.24496	4.30095e-89								g25466	-3.32388	1.13566e-71			g32604	-1.40752	0.000721986
											g25309	-3.25068	1.91526e-153								g21513	-3.32839	4.31609e-269			g30499	-1.40976	0.000901962
											g573	-3.25133	8.39657e-107								g25380	-3.33421	6.83794e-186			g55196	-1.41045	4.17996e-08
											g16958	-3.25205	0								g1822	-3.34414	3.29275e-129			g59071	-1.41408	0.00220428
											g24316	-3.25229	0								g13711	-3.34847	1.6908e-83			g5500	-1.41423	4.00955e-29
											g58267	-3.25505	2.75733e-179								g61812	-3.34958	2.02939e-177			g34287	-1.41457	0.0141701
											g47072	-3.26336	6.83683e-96								g32017	-3.35428	7.47107e-131			g49988	-1.41773	6.71114e-12
											g29834	-3.26883	0								g40236	-3.35884	2.01098e-55			g14255	-1.41826	0.000447086
											g59035	-3.27343	2.43526e-269								g62017	-3.36933	0			g13932	-1.41959	2.30045e-30
											g48503	-3.27752	2.78437e-96								g26218	-3.36987	5.28419e-71			g60978	-1.42135	0.00292995
											g46789	-3.27759	6.0851e-286								g37880	-3.3781	2.92922e-81			g13021	-1.4254	7.87046e-14
											g4159	-3.27908	1.7233e-177								g13253	-3.37874	1.04333e-56			g19670	-1.42936	0.000104764
											g62593	-3.28057	0								g38154	-3.39052	2.19522e-77			g4799	-1.43058	6.28575e-08
											g30161	-3.28344	0								g20248	-3.39251	7.7689e-144			g61318	-1.43345	6.66606e-07
											g6895	-3.28362	0								g25541	-3.39252	1.68311e-172			g64069	-1.43767	2.36016e-14
											g62112	-3.28539	1.41899e-166								g43775	-3.39302	3.0591e-115			g18133	-1.43887	0.00524568
											g19902	-3.29204	5.74179e-102								g876	-3.40271	3.54019e-89			g30398	-1.44032	1.79703e-14
											g53926	-3.29866	5.23087e-104								g25903	-3.40902	1.01567e-77			g43435	-1.44263	0.000241531
											g58786	-3.30582	3.49423e-93								g6017	-3.41268	2.55536e-201			g9529	-1.44356	0.00116418
											g25380	-3.30594	9.17545e-284								g19902	-3.41511	4.08608e-75			g12975	-1.44396	0.0011136
											g29756	-3.30739	1.99284e-91								g7958	-3.42259	0			g39244	-1.44565	2.37175e-14
											g33528	-3.3083	1.07593e-86								g21004	-3.42509	1.38592e-238			g35944	-1.44571	0.000535771
[truncated: 1,104 more rows]

## Sheet: Table S4D
Table S4D GO enrichment analysis of cell type-speficic DEGs (Infected cell vs uninfected cells)
ID	Description	GeneRatio	BgRatio	pvalue	p.adjust	qvalue	geneID	Count			ID	Description	GeneRatio	BgRatio	pvalue	p.adjust	qvalue	geneID
GO:0022625	cytosolic large ribosomal subunit	136/1428	228/60364	4.8766e-160	5.47642e-70	4.32734e-157	g39004/g35016/g2456/g43460/g4630/g333/g9018/g13931/g46617/g20819/g58362/g57671/g1044/g47269/g11735/g48994/g10185/g15906/g55302/g6113/g25117/g1573/g5120/g26463/g976/g5190/g3801/g3831/g5281/g20236/g50532/g19856/g53832/g23414/g30524/g35034/g9087/g42543/g1039/g31251/g4484/g11901/g35829/g5194/g5500/g30458/g13478/g13932/g49496/g10474/g25656/g47150/g27267/g9706/g43033/g49480/g25000/g60927/g4434/g23242/g…	136			GO:0030527	structural constituent of chromatin	14/548	98/60364	3.55883e-13	2.0886e-10	1.67972e-10	g251/g10035/g31178/g10031/g4799/g55015/g55014/g55871/g4800/g4820/g13164/g29528/g16914/g60865
GO:0009535	chloroplast thylakoid membrane	61/1428	115/60364	1.34198e-67	7.5352e-65	5.95414e-65	g29834/g35362/g9989/g37391/g5240/g9751/g33901/g24312/g5445/g10027/g30155/g39208/g8948/g17905/g53349/g37937/g20248/g1822/g55675/g59648/g61561/g43775/g25672/g31185/g7173/g34449/g55047/g37393/g53218/g13792/g7161/g61055/g43385/g26780/g1172/g31194/g60170/g42876/g9736/g38044/g24713/g58982/g31548/g54350/g59979/g58875/g31397/g34283/g13564/g54964/g50581/g34739/g37389/g280/g23740/g51191/g193/g15752/g41282/…	61			GO:0022625	cytosolic large ribosomal subunit	19/548	228/60364	4.87991e-13	2.0886e-10	1.67972e-10	g9087/g1257/g8785/g58177/g61062/g54616/g16684/g4484/g49496/g59468/g48994/g13478/g41685/g60927/g45409/g23417/g25656/g44972/g333
GO:0009536	plastid	88/1428	385/60364	2.73903e-59	1.02531e-56	8.10178e-57	g7125/g52527/g20149/g21739/g54429/g54359/g21844/g20458/g13324/g46227/g37391/g50425/g39208/g59505/g55622/g20358/g297/g13403/g54885/g61561/g25672/g17947/g31185/g29616/g23668/g37393/g29906/g38237/g21704/g24316/g43385/g39398/g60789/g1106/g38300/g1172/g41630/g17181/g1477/g25417/g20810/g61617/g4398/g60863/g57145/g41887/g60710/g16874/g33528/g54350/g59979/g58875/g31397/g34283/g13564/g45761/g54964/g50581/…	88			GO:0009536	plastid	21/548	385/60364	9.40924e-11	2.68477e-08	2.15917e-08	g10035/g10031/g4799/g34930/g18102/g55622/g21704/g55871/g4800/g39208/g31185/g60710/g17181/g41630/g4398/g9483/g23468/g61617/g8185/g765/g43041
GO:0022627	cytosolic small ribosomal subunit	49/1428	80/60364	6.61808e-59	1.85803e-56	1.46817e-56	g873/g5092/g62795/g42823/g51669/g11431/g3651/g43896/g5155/g48978/g11275/g10329/g61980/g22143/g55157/g13021/g35255/g9924/g59753/g2036/g47257/g50955/g9891/g1608/g50405/g3336/g50555/g9811/g4438/g9923/g42483/g11539/g3668/g11523/g25356/g46581/g43091/g4773/g12975/g2187/g22105/g14547/g12278/g25966/g21742/g4371/g3295/g34067/g41011	49			GO:0000786	nucleosome	14/548	150/60364	1.27075e-10	2.71941e-08	2.18703e-08	g54085/g251/g10035/g31178/g10031/g4799/g55015/g55014/g55871/g4800/g4820/g13164/g50217/g60865
GO:0015979	photosynthesis	55/1428	119/60364	1.07365e-56	2.41143e-54	1.90545e-54	g54082/g20149/g21557/g54429/g46227/g37391/g5240/g9751/g49009/g43774/g8948/g48926/g297/g20248/g54397/g58521/g48682/g9721/g31185/g7173/g34449/g8923/g53373/g42791/g37393/g53218/g7161/g43385/g50500/g11485/g26780/g1172/g20810/g4398/g8934/g29965/g42876/g9736/g24713/g58982/g54350/g59979/g58875/g20022/g31397/g34283/g13564/g45761/g54964/g50581/g34739/g37389/g280/g23740/g41282	55			GO:0000502	proteasome complex	13/548	128/60364	2.02258e-10	3.46265e-08	2.78477e-08	g38669/g4478/g28080/g26616/g54602/g5233/g49760/g20351/g16151/g1972/g3567/g60507/g40432
GO:0015935	small ribosomal subunit	52/1428	110/60364	2.50879e-54	4.69562e-52	3.71037e-52	g21133/g61239/g33573/g13834/g33582/g52891/g62795/g42823/g31678/g11431/g20510/g41630/g14103/g61505/g52286/g55157/g35034/g8758/g47257/g1608/g50405/g34136/g50555/g13168/g30590/g25101/g1269/g25790/g13302/g54005/g5551/g8419/g33586/g11523/g25356/g32070/g2432/g4773/g45455/g23476/g59670/g43656/g51469/g48072/g59599/g58197/g10413/g29212/g4371/g899/g60433/g41011	52			GO:0046982	protein heterodimerization activity	17/548	264/60364	4.69869e-10	6.70347e-08	5.39113e-08	g54085/g251/g10035/g31178/g10031/g4799/g55015/g31734/g55014/g55871/g4800/g4429/g57861/g4820/g21279/g61457/g60865
GO:0009523	photosystem II	37/1428	67/60364	2.18959e-42	3.51272e-40	2.77567e-40	g54082/g21557/g37391/g24312/g43774/g8948/g20248/g61561/g9721/g25672/g31185/g34449/g30850/g13303/g42791/g37393/g53218/g43385/g50500/g26780/g1172/g29965/g24713/g58982/g54350/g59979/g58875/g20022/g34283/g13564/g54964/g50581/g34739/g37389/g280/g23740/g41282	37			GO:0005743	mitochondrial inner membrane	16/548	279/60364	7.97895e-09	9.75712e-07	7.84697e-07	g13661/g22580/g48337/g48041/g51362/g24695/g1341/g25421/g32017/g55787/g19465/g47077/g38032/g63395/g64127/g765
GO:0019843	rRNA binding	44/1428	129/60364	1.42736e-38	2.00365e-36	1.58324e-36	g5752/g39165/g21133/g35016/g19479/g60272/g4630/g3987/g33573/g31396/g13834/g33582/g42823/g57671/g11431/g20510/g55302/g41630/g10329/g9924/g25656/g47257/g27267/g50555/g20707/g3609/g25790/g860/g9923/g35068/g381/g33586/g11523/g62735/g43656/g63054/g59599/g20246/g10413/g63063/g4371/g61062/g24749/g8744	44			GO:0009535	chloroplast thylakoid membrane	11/548	115/60364	9.49942e-09	1.01644e-06	8.1745e-07	g53349/g39208/g31185/g33901/g20248/g43465/g60170/g55047/g23740/g31194/g24713
GO:0009579	thylakoid	35/1428	83/60364	8.40992e-35	1.04937e-32	8.29189e-33	g29834/g54082/g35362/g37391/g33901/g39208/g50214/g54397/g31185/g7173/g34449/g42791/g37393/g30153/g7161/g61055/g43385/g50500/g1172/g38044/g54350/g59979/g58875/g31397/g34283/g13564/g54964/g50581/g34739/g37389/g280/g41282/g4799/g59367/g20981	35			GO:0015995	chlorophyll biosynthetic process	7/548	34/60364	2.12823e-08	2.02418e-06	1.62791e-06	g24401/g54990/g54465/g44940/g27011/g44968/g4398
GO:0009522	photosystem I	26/1428	39/60364	2.55591e-33	2.87028e-31	2.26803e-31	g20149/g37391/g5240/g9751/g49009/g48926/g48682/g31185/g7173/g37393/g7161/g43385/g20810/g9736/g54350/g59979/g58875/g31397/g34283/g13564/g45761/g54964/g50581/g34739/g37389/g280	26			GO:0009579	thylakoid	9/548	83/60364	7.10729e-08	6.08384e-06	4.89281e-06	g10035/g10031/g4799/g30153/g55871/g4800/g39208/g31185/g33901
GO:0022626	cytosolic ribosome	29/1428	81/60364	1.32246e-26	1.35011e-24	1.06683e-24	g52891/g31678/g20510/g14103/g61505/g35034/g8758/g34136/g13168/g30590/g25101/g1269/g25790/g13302/g54005/g5551/g8419/g32070/g2432/g45455/g23476/g59670/g51469/g48072/g59599/g58197/g10413/g29212/g899	29			GO:0000325	plant-type vacuole	6/548	29/60364	2.16698e-07	1.6863e-05	1.35617e-05	g10035/g10031/g4799/g55871/g4800/g55099
GO:0002181	cytoplasmic translation	20/1428	31/60364	1.74875e-25	1.63654e-23	1.29315e-23	g62795/g1044/g15906/g23440/g976/g3801/g19856/g55157/g1039/g27267/g20707/g34396/g20592/g54098/g23442/g58115/g55620/g25184/g20336/g20002	20			GO:0005694	chromosome	15/548	354/60364	1.1351e-06	7.57795e-05	6.09441e-05	g251/g10035/g31178/g10031/g4799/g55015/g55014/g55871/g4800/g59080/g31411/g4820/g13164/g17437/g60865
GO:0042254	ribosome biogenesis	44/1428	273/60364	1.22178e-23	1.05543e-21	8.33974e-22	g6895/g44735/g44770/g52891/g23055/g51669/g31678/g47269/g11735/g16908/g60513/g43896/g10329/g61980/g3831/g61505/g35255/g16904/g9924/g3840/g24568/g44972/g4438/g42815/g9923/g5551/g8702/g59969/g851/g55112/g59882/g4773/g43656/g40876/g29212/g55714/g26852/g18133/g24749/g12376/g18625/g25527/g18864/g42947	44			GO:1902600	proton transmembrane transport	12/548	223/60364	1.15086e-06	7.57795e-05	6.09441e-05	g13661/g59946/g16375/g48041/g10504/g42829/g19596/g58768/g34211/g55099/g58873/g49923
GO:0006414	translational elongation	26/1428	80/60364	9.57043e-23	7.67685e-21	6.06607e-21	g33567/g19770/g55622/g24592/g13931/g38237/g13932/g10474/g50542/g33528/g27240/g51022/g4763/g26588/g4592/g4758/g44482/g47334/g4759/g63563/g48035/g63677/g34566/g53679/g41883/g5820	26			GO:0019843	rRNA binding	9/548	129/60364	3.06489e-06	0.000187396	0.00015071	g61062/g11523/g41630/g8744/g35068/g381/g62735/g4371/g25656
GO:0015995	chlorophyll biosynthetic process	19/1428	34/60364	1.50155e-22	1.12416e-20	8.88283e-21	g54429/g46227/g31592/g11866/g54465/g24401/g297/g58521/g53373/g49063/g54990/g44968/g27011/g44940/g4398/g42876/g14255/g6549/g54894	19			GO:0019288	isopentenyl diphosphate biosynthetic process, methylerythritol 4-phosphate pathway	4/548	13/60364	4.50136e-06	0.000240823	0.000193677	g54990/g33780/g44940/g44968
GO:0015934	large ribosomal subunit	24/1428	71/60364	1.4315e-21	1.00474e-19	7.93919e-20	g2456/g31104/g47140/g333/g9018/g57671/g1044/g25117/g23440/g5190/g50532/g53832/g1039/g11901/g5194/g45409/g33595/g58177/g11925/g23442/g11899/g49432/g29197/g16776	24			GO:0033180	proton-transporting V-type ATPase, V1 domain	4/548	13/60364	4.50136e-06	0.000240823	0.000193677	g42829/g58768/g55099/g49923
GO:0000028	ribosomal small subunit assembly	18/1428	43/60364	1.68558e-18	1.11348e-16	8.79844e-17	g62795/g55157/g2036/g3336/g50555/g13168/g25101/g1269/g8419/g381/g32070/g45455/g2187/g58197/g10413/g14547/g25966/g3295	18			GO:0003746	translation elongation factor activity	7/548	74/60364	5.20465e-06	0.000262069	0.000210764	g42780/g33567/g55622/g19770/g61457/g34566/g63677
GO:0009768	photosynthesis, light harvesting in photosystem I	14/1428	22/60364	4.32748e-18	2.69986e-16	2.13337e-16	g37391/g31185/g37393/g43385/g54350/g59979/g58875/g34283/g13564/g54964/g50581/g34739/g37389/g280	14			GO:0006414	translational elongation	7/548	80/60364	8.76696e-06	0.000416918	0.000335298	g42780/g33567/g55622/g19770/g61457/g34566/g63677
GO:0009765	photosynthesis, light harvesting	14/1428	25/60364	5.64538e-17	3.33672e-15	2.6366e-15	g37391/g31185/g37393/g43385/g54350/g59979/g58875/g34283/g13564/g54964/g50581/g34739/g37389/g280	14			GO:0070469	respirasome	6/548	54/60364	9.72241e-06	0.00043802	0.000352269	g13661/g22580/g48337/g24695/g25421/g63395
GO:0009654	photosystem II oxygen evolving complex	13/1428	21/60364	1.17548e-16	6.60032e-15	5.21542e-15	g54082/g8948/g20248/g9721/g34449/g42791/g53218/g26780/g1172/g29965/g24713/g58982/g23740	13			GO:0005750	mitochondrial respiratory chain complex III	4/548	18/60364	1.85822e-05	0.000757444	0.000609159	g13661/g48337/g51362/g63395
GO:0016168	chlorophyll binding	14/1428	27/60364	2.43064e-16	1.29981e-14	1.02708e-14	g37391/g31185/g37393/g43385/g54350/g59979/g58875/g34283/g13564/g54964/g50581/g34739/g37389/g280	14			GO:0006122	mitochondrial electron transport, ubiquinol to cytochrome c	4/548	18/60364	1.85822e-05	0.000757444	0.000609159	g13661/g48337/g51362/g63395
GO:0003746	translation elongation factor activity	20/1428	74/60364	4.63384e-16	2.36536e-14	1.86905e-14	g33567/g19770/g55622/g24592/g38237/g50542/g33528/g51022/g4763/g4758/g44482/g47334/g4759/g63563/g48035/g63677/g34566/g53679/g41883/g5820	20			GO:0008652	amino acid biosynthetic process	10/548	204/60364	2.00465e-05	0.000779992	0.000627293	g63984/g24631/g16764/g11405/g26957/g25580/g13298/g46575/g42961/g42717
GO:0008652	amino acid biosynthetic process	29/1428	204/60364	1.34012e-14	6.54329e-13	5.17036e-13	g59505/g49936/g50936/g25309/g46800/g63984/g42961/g11405/g34205/g33490/g42717/g29095/g42746/g50247/g54880/g9333/g42970/g233/g8240/g25580/g13298/g22408/g60494/g11788/g60801/g46575/g4161/g43819/g54948	29			GO:0046933	proton-transporting ATP synthase activity, rotational mechanism	5/548	40/60364	3.06469e-05	0.00111807	0.000899183	g48041/g10504/g42829/g58768/g55099
GO:0070180	large ribosomal subunit rRNA binding	11/1428	18/60364	3.41759e-14	1.59915e-12	1.26361e-12	g35016/g10185/g3831/g49480/g5266/g3840/g48009/g4731/g8253/g25527/g16776	11			GO:0000398	mRNA splicing, via spliceosome	13/548	360/60364	3.13476e-05	0.00111807	0.000899183	g50331/g37410/g8704/g35172/g25674/g13710/g53880/g26962/g21279/g41965/g7251/g17051/g35220
GO:0009538	photosystem I reaction center	9/1428	12/60364	4.67094e-13	2.09819e-11	1.65794e-11	g5240/g9751/g49009/g48926/g48682/g7173/g7161/g9736/g31397	9			GO:0003743	translation initiation factor activity	10/548	231/60364	5.74404e-05	0.00196676	0.00158173	g55847/g60695/g8704/g10504/g54346/g43735/g9884/g7689/g63677/g31273
GO:0030054	cell junction	30/1428	257/60364	9.22045e-13	3.98252e-11	3.1469e-11	g58673/g13931/g46617/g20278/g3831/g20236/g13021/g13932/g2036/g3840/g34136/g42646/g25790/g13302/g27240/g10974/g34266/g11523/g1634/g59670/g12975/g59599/g4731/g48574/g12278/g20721/g34307/g39036/g25527/g49317	30			GO:0006413	translational initiation	10/548	233/60364	6.17213e-05	0.00203206	0.00163424	g55847/g60695/g8704/g10504/g54346/g43735/g9884/g7689/g63677/g31273
GO:0009570	chloroplast stroma	20/1428	109/60364	1.291e-12	5.3696e-11	4.24293e-11	g54057/g26136/g46227/g25257/g43386/g12892/g41083/g17947/g24994/g29906/g25309/g24316/g46357/g54075/g15362/g721/g11405/g41282/g23936/g14620	20			GO:0031072	heat shock protein binding	6/548	75/60364	6.45407e-05	0.00204618	0.0016456	g19459/g59502/g34361/g34218/g46564/g51258
GO:0010207	photosystem II assembly	9/1428	15/60364	9.96653e-12	3.99729e-10	3.15857e-10	g24312/g54397/g38436/g30850/g13303/g20638/g1172/g29965/g41282	9			GO:0036402	proteasome-activating activity	4/548	27/60364	9.9889e-05	0.00305375	0.00245592	g5233/g16151/g1972/g60507
GO:0006364	rRNA processing	34/1428	385/60364	7.4625e-11	2.88979e-09	2.28345e-09	g42642/g49608/g43297/g52891/g31678/g11735/g41630/g25117/g3801/g61505/g2036/g45409/g24568/g34136/g25101/g42646/g58177/g54005/g32110/g55112/g45455/g59670/g51469/g58197/g16879/g38185/g29212/g31861/g55714/g26852/g39036/g12376/g8744/g42947	34			GO:0005747	mitochondrial respiratory chain complex I	5/548	54/60364	0.000132688	0.00380219	0.00305783	g22580/g24695/g25421/g13566/g38032
GO:0031969	chloroplast membrane	13/1428	53/60364	2.40718e-10	9.01087e-09	7.12018e-09	g31823/g21704/g34549/g25698/g34320/g31856/g49604/g3883/g163/g46602/g29907/g1548/g5032	13			GO:1901800	positive regulation of proteasomal protein catabolic process	4/548	29/60364	0.000133254	0.00380219	0.00305783	g5233/g16151/g1972/g60507
GO:0042273	ribosomal large subunit biogenesis	16/1428	93/60364	6.10156e-10	2.21034e-08	1.74656e-08	g1044/g11735/g25117/g3801/g5281/g1039/g49496/g9706/g45409/g24568/g58177/g851/g20336/g55714/g29197/g12376	16			GO:0005681	spliceosomal complex	11/548	310/60364	0.000146168	0.00403613	0.00324598	g8704/g35172/g13710/g9561/g19666/g20788/g34308/g26962/g21279/g17051/g35220
GO:0009416	response to light stimulus	16/1428	95/60364	8.45932e-10	2.96869e-08	2.34579e-08	g37391/g31185/g37393/g43385/g54350/g59979/g58875/g34283/g13564/g54964/g50581/g34739/g37389/g280/g34782/g43685	16			GO:0009532	plastid stroma	3/548	12/60364	0.000154014	0.00411987	0.00331332	g11405/g60710/g23468
GO:0009706	chloroplast inner membrane	11/1428	39/60364	1.14107e-09	3.8831e-08	3.06834e-08	g20715/g33880/g21704/g23982/g20741/g58847/g163/g59513/g29907/g4074/g48491	11			GO:0006334	nucleosome assembly	7/548	126/60364	0.000162885	0.00422514	0.00339798	g10035/g10031/g4799/g55871/g4800/g13164/g50217
GO:0045454	cell redox homeostasis	12/1428	51/60364	1.9883e-09	6.56723e-08	5.18927e-08	g58240/g58267/g25157/g55047/g29906/g5114/g50500/g43049/g31194/g19972/g25076/g43258	12			GO:0009414	response to water deprivation	5/548	57/60364	0.000171796	0.00432522	0.00347847	g10035/g10031/g4799/g55871/g4800
GO:0009532	plastid stroma	7/1428	12/60364	2.91716e-09	9.35992e-08	7.39599e-08	g43297/g39398/g38300/g1477/g60710/g23468/g11405	7			GO:0051085	chaperone cofactor-dependent protein refolding	6/548	91/60364	0.000189086	0.0046245	0.00371916	g19459/g59502/g34361/g34218/g46564/g51258
GO:0000027	ribosomal large subunit assembly	13/1428	67/60364	5.34185e-09	1.66636e-07	1.31672e-07	g5120/g3831/g25656/g4434/g3840/g46517/g34396/g11269/g3609/g49934/g20246/g25527/g18864	13			GO:0071806	protein transmembrane transport	4/548	33/60364	0.000223081	0.00530437	0.00426594	g42829/g5577/g58768/g43465
GO:0000463	maturation of LSU-rRNA from tricistronic rRNA transcript (SSU-rRNA, 5.8S rRNA, LSU-rRNA)	10/1428	35/60364	5.70174e-09	1.73055e-07	1.36744e-07	g20236/g31251/g60927/g41685/g31564/g25663/g3594/g48574/g12376/g49317	10			GO:0000775	chromosome, centromeric region	5/548	61/60364	0.000236935	0.00548153	0.00440841	g10035/g10031/g4799/g55871/g4800
GO:0019288	isopentenyl diphosphate biosynthetic process, methylerythritol 4-phosphate pathway	7/1428	13/60364	6.19052e-09	1.82946e-07	1.4456e-07	g43167/g54990/g44968/g33780/g44940/g19638/g59727	7			GO:0004175	endopeptidase activity	5/548	63/60364	0.000275804	0.00617598	0.00496691	g54437/g54602/g49760/g40432/g8185
GO:0004176	ATP-dependent peptidase activity	13/1428	74/60364	1.89062e-08	5.44402e-07	4.30173e-07	g23939/g30695/g43297/g39398/g38300/g1477/g60710/g43148/g23468/g23730/g55282/g38327/g9967	13			GO:0005839	proteasome core complex	4/548	35/60364	0.000281382	0.00617598	0.00496691	g54602/g49760/g3567/g40432
GO:0030388	fructose 1,6-bisphosphate metabolic process	7/1428	16/60364	3.87773e-08	1.08867e-06	8.60244e-07	g3803/g24370/g59775/g29379/g58903/g53926/g42350	7			GO:0046034	ATP metabolic process	3/548	15/60364	0.00031213	0.00667957	0.00537191	g42829/g58768/g55099
GO:0009534	chloroplast thylakoid	9/1428	34/60364	6.96594e-08	1.90799e-06	1.50765e-06	g1169/g23939/g30695/g43297/g50500/g25593/g41282/g55282/g9967	9			GO:0043022	ribosome binding	6/548	101/60364	0.000333143	0.00695538	0.00559372	g55847/g42780/g34930/g43465/g63677/g765
GO:0009658	chloroplast organization	13/1428	84/60364	9.08602e-08	2.42943e-06	1.91968e-06	g1863/g12819/g8476/g43297/g20638/g3899/g4477/g5577/g1705/g38686/g27423/g4074/g59973	13			GO:0046961	proton-transporting ATPase activity, rotational mechanism	5/548	66/60364	0.000342945	0.00698954	0.0056212	g42829/g19596/g58768/g55099/g49923
GO:0043022	ribosome binding	14/1428	101/60364	1.21958e-07	3.18508e-06	2.51678e-06	g26774/g13403/g52286/g49962/g15497/g765/g61217/g44482/g47334/g23476/g63563/g34930/g63677/g55714	14			GO:0015935	small ribosomal subunit	6/548	110/60364	0.000525781	0.0104667	0.00841765	g2432/g32070/g11523/g41630/g41011/g4371
GO:0008379	thioredoxin peroxidase activity	6/1428	12/60364	1.41844e-07	3.53979e-06	2.79706e-06	g58240/g58267/g25157/g55047/g31194/g25076	6			GO:0030014	CCR4-NOT complex	4/548	43/60364	0.000626275	0.0121839	0.00979865	g31098/g5724/g33860/g59929
GO:0009773	photosynthetic electron transport in photosystem I	6/1428	12/60364	1.41844e-07	3.53979e-06	2.79706e-06	g53349/g60183/g33877/g31548/g15752/g10000	6			GO:0008540	proteasome regulatory particle, base subcomplex	4/548	44/60364	0.000683993	0.0130111	0.0104639	g5233/g16151/g1972/g60507
GO:0006782	protoporphyrinogen IX biosynthetic process	8/1428	30/60364	3.54216e-07	8.64748e-06	6.83304e-06	g60257/g11866/g54465/g38959/g42657/g35004/g39213/g41998	8			GO:0006457	protein folding	12/548	435/60364	0.000724866	0.0134834	0.0108437	g20498/g52130/g59502/g4707/g34361/g30328/g60156/g34218/g44416/g46564/g45846/g51258
GO:0019898	extrinsic component of membrane	10/1428	54/60364	4.94387e-07	1.16881e-05	9.23565e-06	g54082/g8948/g20248/g34449/g42791/g53218/g26780/g24713/g58982/g23740	10			GO:0009228	thiamine biosynthetic process	3/548	20/60364	0.000756077	0.0134834	0.0108437	g54990/g44940/g44968
GO:0006779	porphyrin-containing compound biosynthetic process	9/1428	42/60364	4.9958e-07	1.16881e-05	9.23565e-06	g60257/g11866/g54465/g38959/g42657/g63907/g35004/g39213/g41998	9			GO:0019773	proteasome core complex, alpha-subunit complex	3/548	20/60364	0.000756077	0.0134834	0.0108437	g54602/g49760/g3567
GO:0042651	thylakoid membrane	7/1428	22/60364	5.1045e-07	1.16987e-05	9.24402e-06	g416/g53218/g36554/g53745/g27423/g41282/g46708	7			GO:0005777	peroxisome	8/548	212/60364	0.000773573	0.0135139	0.0108682	g24671/g10035/g10031/g4799/g55871/g4800/g38327/g33782
GO:0034599	cellular response to oxidative stress	10/1428	58/60364	9.89498e-07	2.14641e-05	1.69604e-05	g58240/g58267/g25157/g55047/g16821/g31194/g34007/g14242/g3974/g25076	10			GO:0015979	photosynthesis	6/548	119/60364	0.000795581	0.0136203	0.0109539	g49009/g31185/g20248/g4398/g23740/g24713
GO:0003755	peptidyl-prolyl cis-trans isomerase activity	15/1428	137/60364	9.92938e-07	2.14641e-05	1.69604e-05	g43959/g58036/g30153/g47081/g53015/g49962/g52957/g58019/g32110/g61217/g30434/g13667/g31935/g20289/g39572	15			GO:0042026	protein refolding	5/548	80/60364	0.000831531	0.0139567	0.0112244	g19459/g59502/g4707/g34218/g1275
GO:0016671	oxidoreductase activity, acting on a sulfur group of donors, disulfide as acceptor	7/1428	24/60364	9.93885e-07	2.14641e-05	1.69604e-05	g25257/g24063/g61672/g59568/g43664/g193/g54314	7			GO:0009654	photosystem II oxygen evolving complex	3/548	21/60364	0.000876162	0.014423	0.0115994	g20248/g23740/g24713
GO:0016853	isomerase activity	29/1428	441/60364	1.03225e-06	2.1872e-05	1.72828e-05	g11866/g18506/g34019/g43959/g56269/g58036/g30153/g61043/g47081/g53015/g29334/g46800/g42978/g52957/g20570/g58019/g32110/g61217/g1634/g50100/g30434/g54894/g13667/g5074/g38185/g31935/g20289/g24738/g20814	29			GO:0043161	proteasome-mediated ubiquitin-dependent protein catabolic process	8/548	219/60364	0.000953848	0.0154055	0.0123896	g38669/g26616/g54602/g5233/g49760/g20351/g16151/g1972
GO:0033014	tetrapyrrole biosynthetic process	7/1428	25/60364	1.35212e-06	2.8119e-05	2.2219e-05	g60257/g11866/g24401/g38959/g42657/g58521/g41998	7			GO:0000785	chromatin	10/548	330/60364	0.000978624	0.015513	0.012476	g4285/g13479/g13512/g22260/g31411/g29528/g16914/g34972/g22464/g50217
GO:0006783	heme biosynthetic process	8/1428	37/60364	2.0172e-06	4.11876e-05	3.25455e-05	g60257/g54465/g38959/g42657/g35004/g39213/g32017/g41998	8			GO:0009506	plasmodesma	5/548	86/60364	0.00115231	0.0179342	0.0144232	g10035/g10031/g4799/g55871/g4800
GO:0051117	ATPase binding	8/1428	38/60364	2.5021e-06	5.0176e-05	3.96479e-05	g43297/g39398/g38300/g1477/g60710/g43148/g23468/g26852	8			GO:0045454	cell redox homeostasis	4/548	51/60364	0.00119773	0.0182017	0.0146384	g43049/g41751/g55047/g31194
GO:0042026	protein refolding	11/1428	80/60364	2.94248e-06	5.79719e-05	4.58081e-05	g50608/g10238/g31384/g6158/g10265/g59502/g10264/g34266/g4707/g45616/g1275	11			GO:0003924	GTPase activity	12/548	462/60364	0.00121203	0.0182017	0.0146384	g33567/g55622/g54346/g54252/g45063/g58187/g20781/g1038/g53795/g9483/g43371/g765
GO:0048564	photosystem I assembly	5/1428	11/60364	3.01849e-06	5.84443e-05	4.61813e-05	g30155/g39208/g13792/g26780/g4477	5			GO:0031981	nuclear lumen	6/548	131/60364	0.0013083	0.0193087	0.0155286	g10035/g10031/g4799/g55871/g4800/g63918
GO:0016209	antioxidant activity	7/1428	30/60364	5.1639e-06	9.82891e-05	7.76658e-05	g58240/g58267/g25157/g55047/g31194/g42372/g25076	7			GO:0071944	cell periphery	6/548	132/60364	0.00136026	0.0194156	0.0156146	g10035/g10031/g4799/g52130/g55871/g4800
GO:0005759	mitochondrial matrix	18/1428	218/60364	5.30886e-06	9.93642e-05	7.85152e-05	g19770/g31189/g9078/g333/g9018/g55040/g25790/g765/g381/g34266/g58859/g20438/g59599/g22408/g57772/g57664/g1275/g13550	18			GO:0010498	proteasomal protein catabolic process	4/548	53/60364	0.00138359	0.0194156	0.0156146	g54602/g49760/g3567/g40432
GO:0032543	mitochondrial translation	9/1428	55/60364	5.4077e-06	9.95549e-05	7.8666e-05	g33567/g55622/g38237/g11793/g9051/g7978/g35340/g53714/g60433	9			GO:0031969	chloroplast membrane	4/548	53/60364	0.00138359	0.0194156	0.0156146	g34320/g21704/g31856/g46602
GO:0006515	protein quality control for misfolded or incompletely synthesized proteins	8/1428	42/60364	5.55335e-06	0.000100587	7.94817e-05	g43297/g39398/g38300/g1477/g60710/g43148/g23468/g38327	8			GO:0005682	U5 snRNP	3/548	25/60364	0.00147489	0.020363	0.0163766	g37410/g9561/g35220
GO:0051085	chaperone cofactor-dependent protein refolding	11/1428	91/60364	1.04911e-05	0.000187008	0.000147769	g31189/g9078/g50608/g6158/g55040/g59502/g46564/g34266/g59409/g45616/g51258	11			GO:0042273	ribosomal large subunit biogenesis	5/548	93/60364	0.00163293	0.0221871	0.0178435	g58177/g57831/g49496/g45409/g12700
GO:0051536	iron-sulfur cluster binding	19/1428	254/60364	1.21823e-05	0.000213762	0.00016891	g7125/g5118/g5789/g37937/g33235/g19690/g43167/g14255/g42961/g58859/g11405/g42717/g42970/g8240/g47774/g57772/g57664/g20981/g59727	19			GO:0030163	protein catabolic process	5/548	97/60364	0.001966	0.0262952	0.0211474	g5233/g16151/g1972/g38327/g60507
GO:0042802	identical protein binding	26/1428	424/60364	1.25608e-05	0.000217011	0.000171477	g6895/g25380/g44735/g44770/g58240/g58267/g56269/g52286/g42994/g9263/g42350/g26050/g58060/g4285/g20438/g25076/g25580/g22408/g35340/g24795/g31030/g15599/g60203/g24749/g49818/g29206	26			GO:0005788	endoplasmic reticulum lumen	4/548	59/60364	0.00206048	0.0271349	0.0218227	g19459/g34361/g34218/g46564
GO:0071944	cell periphery	13/1428	132/60364	1.64493e-05	0.000279888	0.000221161	g34533/g1608/g34136/g50555/g9099/g4763/g4758/g4799/g4773/g4759/g59670/g48035/g20721	13			GO:0051536	iron-sulfur cluster binding	8/548	254/60364	0.00242044	0.0313924	0.0252467	g13661/g53771/g25421/g11405/g26957/g42961/g42717/g51243
GO:0006457	protein folding	26/1428	435/60364	1.95067e-05	0.000326956	0.000258353	g31189/g9078/g12892/g50608/g10238/g31384/g6158/g55040/g10265/g11485/g59502/g10264/g46564/g49962/g8934/g34266/g61217/g59409/g4707/g51258/g20498/g31935/g39572/g25551/g20814/g4176	26			GO:0060255	regulation of macromolecule metabolic process	3/548	30/60364	0.00251747	0.0319694	0.0257107	g25229/g31560/g802
GO:0016597	amino acid binding	8/1428	50/60364	2.13678e-05	0.000352883	0.00027884	g29134/g62593/g50936/g31521/g35314/g33990/g47412/g60494	8			GO:0006325	chromatin organization	8/548	256/60364	0.00253962	0.0319694	0.0257107	g61250/g34161/g4285/g55196/g13512/g29528/g47892/g16914
GO:0071482	cellular response to light stimulus	5/1428	16/60364	2.58549e-05	0.000420797	0.000332504	g28261/g20638/g57145/g57028/g932	5			GO:0006541	glutamine metabolic process	5/548	108/60364	0.00313587	0.038903	0.031287	g16764/g26957/g54296/g42961/g50288
GO:0009543	chloroplast thylakoid lumen	5/1428	17/60364	3.59126e-05	0.000576141	0.000455253	g30850/g13303/g26780/g15620/g25593	5			GO:0009523	photosystem II	4/548	67/60364	0.00327827	0.0400885	0.0322404	g31185/g20248/g23740/g24713
GO:0016620	oxidoreductase activity, acting on the aldehyde or oxo group of donors, NAD or NADP as acceptor	11/1428	104/60364	3.74102e-05	0.000591713	0.000467558	g53721/g32551/g23981/g37944/g51120/g59925/g32562/g26015/g25580/g61406/g26014	11			GO:0008380	RNA splicing	7/548	212/60364	0.00343395	0.0408051	0.0328167	g37410/g9561/g41630/g34308/g26962/g21279/g35220
GO:0006094	gluconeogenesis	7/1428	42/60364	5.34355e-05	0.000833445	0.000658569	g3803/g24370/g62/g34019/g58903/g53926/g42350	7			GO:0006397	mRNA processing	11/548	459/60364	0.00352124	0.0408051	0.0328167	g37410/g9561/g32564/g8786/g20788/g34308/g26962/g21279/g5392/g34374/g35220
GO:0016117	carotenoid biosynthetic process	5/1428	19/60364	6.48772e-05	0.000998042	0.00078863	g29616/g42978/g16874/g31261/g1548	5			GO:0000932	P-body	5/548	111/60364	0.0035269	0.0408051	0.0328167	g54602/g49760/g1972/g21279/g56520
GO:0006098	pentose-phosphate shunt	6/1428	31/60364	7.69022e-05	0.00116704	0.00092217	g9194/g56269/g32106/g50100/g54791/g15599	6			GO:0045948	positive regulation of translational initiation	2/548	10/60364	0.00352754	0.0408051	0.0328167	g55664/g38294
GO:0005854	nascent polypeptide-associated complex	5/1428	20/60364	8.48171e-05	0.00125328	0.000990316	g867/g20702/g14520/g14517/g58663	5			GO:0046540	U4/U6 x U5 tri-snRNP complex	3/548	34/60364	0.00361225	0.0412278	0.0331566	g37410/g35172/g9561
GO:1901259	chloroplast rRNA processing	5/1428	20/60364	8.48171e-05	0.00125328	0.000990316	g33489/g63877/g38686/g45581/g59973	5			GO:0000428	DNA-directed RNA polymerase complex	5/548	114/60364	0.00395174	0.0444502	0.0357482	g30499/g12267/g59162/g38485/g47096
GO:0004365	glyceraldehyde-3-phosphate dehydrogenase (NAD+) (phosphorylating) activity	4/1428	11/60364	9.01044e-05	0.00129727	0.00102507	g32551/g23981/g37944/g32562	4			GO:0005759	mitochondrial matrix	7/548	218/60364	0.00399844	0.0444502	0.0357482	g32950/g53771/g381/g19770/g765/g1275/g333
GO:0004781	sulfate adenylyltransferase (ATP) activity	4/1428	11/60364	9.01044e-05	0.00129727	0.00102507	g4763/g4758/g4759/g48035	4			GO:0000276	mitochondrial proton-transporting ATP synthase complex, coupling factor F(o)	2/548	11/60364	0.00428559	0.0452897	0.0364234	g48041/g10504
GO:0006536	glutamate metabolic process	6/1428	32/60364	9.27583e-05	0.00130209	0.00102889	g60257/g54465/g38959/g25580/g22408/g41998	6			GO:0004615	phosphomannomutase activity	2/548	11/60364	0.00428559	0.0452897	0.0364234	g50218/g1634
GO:0009941	chloroplast envelope	6/1428	32/60364	9.27583e-05	0.00130209	0.00102889	g54057/g179/g15362/g9077/g5136/g26067	6			GO:0009704	de-etiolation	2/548	11/60364	0.00428559	0.0452897	0.0364234	g42575/g4477
GO:0044183	protein folding chaperone	8/1428	63/60364	0.000117541	0.00162961	0.00128768	g26136/g31189/g9078/g55040/g11485/g49962/g8934/g61217	8			GO:0048564	photosystem I assembly	2/548	11/60364	0.00428559	0.0452897	0.0364234	g39208/g4477
GO:0003924	GTPase activity	25/1428	462/60364	0.000135864	0.00186068	0.00147026	g33567/g55622/g38237/g46679/g54346/g45063/g60513/g35236/g33528/g58643/g9051/g765/g9483/g4763/g851/g4758/g20781/g4759/g24870/g59404/g48035/g46634/g40876/g58187/g17275	25			GO:0008299	isoprenoid biosynthetic process	5/548	118/60364	0.00457349	0.0468465	0.0376754	g54990/g33780/g44940/g44968/g47073
GO:2000142	regulation of DNA-templated transcription initiation	5/1428	22/60364	0.000138509	0.00187404	0.00148082	g28261/g20638/g57145/g57028/g932	5			GO:0032981	mitochondrial respiratory chain complex I assembly	3/548	37/60364	0.00459709	0.0468465	0.0376754	g22580/g25421/g38032
GO:0009082	branched-chain amino acid biosynthetic process	6/1428	35/60364	0.000156398	0.00209089	0.00165218	g46800/g42717/g29095/g54880/g11788/g43819	6			GO:0042277	peptide binding	3/548	37/60364	0.00459709	0.0468465	0.0376754	g43465/g45846/g48288
GO:0010027	thylakoid membrane organization	5/1428	23/60364	0.000173541	0.00226612	0.00179063	g10027/g54397/g2433/g49604/g33485	5			GO:0051117	ATPase binding	3/548	38/60364	0.00495785	0.0499284	0.040154	g60710/g7641/g23468
GO:0045036	protein targeting to chloroplast	5/1428	23/60364	0.000173541	0.00226612	0.00179063	g20715/g179/g59443/g50517/g9483	5
GO:0004462	lactoylglutathione lyase activity	4/1428	13/60364	0.00018797	0.0023718	0.00187414	g25976/g25818/g47812/g31030	4
GO:0005986	sucrose biosynthetic process	4/1428	13/60364	0.00018797	0.0023718	0.00187414	g3803/g24370/g58903/g42350	4
GO:0050790	regulation of catalytic activity	4/1428	13/60364	0.00018797	0.0023718	0.00187414	g4763/g4758/g4759/g48035	4
GO:0009528	plastid inner membrane	4/1428	14/60364	0.000258227	0.00315205	0.00249068	g21704/g163/g59513/g29907	4
GO:0016655	oxidoreductase activity, acting on NAD(P)H, quinone or similar compound as acceptor	4/1428	14/60364	0.000258227	0.00315205	0.00249068	g40891/g50214/g13219/g1822	4
GO:0042132	fructose 1,6-bisphosphate 1-phosphatase activity	4/1428	14/60364	0.000258227	0.00315205	0.00249068	g3803/g24370/g58903/g42350	4
GO:0050661	NADP binding	11/1428	131/60364	0.000298826	0.0036084	0.00285128	g60257/g32551/g38959/g23981/g37944/g55219/g32562/g11405/g54791/g41998/g25956	11
GO:0006000	fructose metabolic process	5/1428	26/60364	0.000319859	0.00378107	0.00298771	g3803/g24370/g58903/g42350/g9927	5
GO:1901342	regulation of vasculature development	5/1428	26/60364	0.000319859	0.00378107	0.00298771	g6895/g44735/g44770/g62/g17275	5
GO:0016835	carbon-oxygen lyase activity	8/1428	73/60364	0.000331427	0.003877	0.00306352	g42642/g49936/g25790/g42717/g54803/g9333/g59599/g13298	8
GO:0051537	2 iron, 2 sulfur cluster binding	10/1428	112/60364	0.00034011	0.00393756	0.00311137	g7125/g5789/g37937/g11668/g332/g14255/g42717/g47774/g57772/g57664	10
GO:0016987	sigma factor activity	5/1428	27/60364	0.000384936	0.00441105	0.00348551	g28261/g20638/g57145/g57028/g932	5
GO:0003743	translation initiation factor activity	15/1428	231/60364	0.000449146	0.00509486	0.00402584	g26774/g13403/g34407/g54346/g50566/g15497/g41282/g29915/g44482/g20301/g63563/g63677/g55714/g25820/g9058	15
GO:0019252	starch biosynthetic process	5/1428	28/60364	0.000459529	0.00510942	0.00403735	g54359/g13324/g39231/g46489/g59752	5
GO:0051174	regulation of phosphorus metabolic process	5/1428	28/60364	0.000459529	0.00510942	0.00403735	g4763/g4758/g4759/g48035/g60203	5
GO:0006413	translational initiation	15/1428	233/60364	0.000491434	0.00541059	0.00427532	g26774/g13403/g34407/g54346/g50566/g15497/g41282/g29915/g44482/g20301/g63563/g63677/g55714/g25820/g9058	15
GO:0008299	isoprenoid biosynthetic process	10/1428	118/60364	0.000515919	0.00562502	0.00444476	g38646/g54990/g44968/g33780/g44940/g54894/g43451/g19638/g61185/g31261	10
GO:0045901	positive regulation of translational elongation	4/1428	17/60364	0.000580152	0.00626452	0.00495008	g44482/g47334/g63563/g63677	4
GO:0015986	proton motive force-driven ATP synthesis	6/1428	46/60364	0.000723585	0.00773892	0.00611511	g21739/g21844/g59328/g60183/g33877/g34031	6
GO:0140662	ATP-dependent protein folding chaperone	10/1428	125/60364	0.000810036	0.00858179	0.00678113	g12892/g50608/g10238/g31384/g6158/g10265/g10264/g46564/g59409/g4707	10
GO:0004069	L-aspartate:2-oxoglutarate aminotransferase activity	4/1428	19/60364	0.000909873	0.00954942	0.00754573	g50447/g50936/g34205/g22408	4
GO:0006002	fructose 6-phosphate metabolic process	5/1428	33/60364	0.00100639	0.0104645	0.00826884	g3803/g24370/g58903/g42350/g9927	5
GO:0006006	glucose metabolic process	6/1428	49/60364	0.00101728	0.0104807	0.00828164	g32551/g23981/g37944/g32562/g1634/g54791	6
GO:0009099	valine biosynthetic process	4/1428	20/60364	0.00111614	0.0113947	0.00900386	g46800/g42717/g54880/g43819	4
GO:0017148	negative regulation of translation	8/1428	89/60364	0.00125062	0.0126214	0.00997315	g43460/g5190/g52286/g5194/g25790/g59599/g49432/g63992	8
GO:0051923	sulfation	6/1428	51/60364	0.00125877	0.0126214	0.00997315	g37880/g37895/g37883/g37881/g37874/g31953	6
GO:0004550	nucleoside diphosphate kinase activity	4/1428	21/60364	0.00135307	0.0134251	0.0106082	g30995/g9099/g26453/g13717	4
GO:0032544	plastid translation	3/1428	10/60364	0.00139968	0.0134251	0.0106082	g252/g20358/g49612	3
GO:0045948	positive regulation of translational initiation	3/1428	10/60364	0.00139968	0.0134251	0.0106082	g15321/g55664/g38294	3
GO:0050482	arachidonic acid secretion	3/1428	10/60364	0.00139968	0.0134251	0.0106082	g36364/g36358/g11335	3
GO:0070181	small ribosomal subunit rRNA binding	3/1428	10/60364	0.00139968	0.0134251	0.0106082	g33573/g33586/g62735	3
GO:0008483	transaminase activity	9/1428	112/60364	0.00141066	0.0134251	0.0106082	g46545/g50447/g11866/g50936/g54240/g34205/g29095/g22408/g24795	9
GO:0051082	unfolded protein binding	14/1428	233/60364	0.00144354	0.0136227	0.0107643	g867/g31189/g9078/g12892/g55040/g59502/g20702/g46564/g34266/g59409/g45616/g51258/g58663/g25551	14
GO:0031386	protein tag activity	5/1428	36/60364	0.00150775	0.01411	0.0111494	g35034/g39244/g5551/g899/g30965	5
GO:0035999	tetrahydrofolate interconversion	4/1428	22/60364	0.00162298	0.0150628	0.0119023	g29134/g21484/g50803/g9285	4
GO:0000413	protein peptidyl-prolyl isomerization	7/1428	73/60364	0.00171228	0.0157614	0.0124543	g30153/g47081/g53015/g52957/g31935/g20289/g39572	7
GO:0009704	de-etiolation	3/1428	11/60364	0.00189077	0.0169866	0.0134225	g42575/g4477/g53064	3
GO:0051920	peroxiredoxin activity	3/1428	11/60364	0.00189077	0.0169866	0.0134225	g58240/g58267/g25076	3
GO:0110102	ribulose bisphosphate carboxylase complex assembly	3/1428	11/60364	0.00189077	0.0169866	0.0134225	g20189/g11485/g8934	3
GO:0008289	lipid binding	15/1428	267/60364	0.00192807	0.0171843	0.0135786	g7950/g7995/g36364/g7958/g61812/g53721/g36358/g62017/g30417/g35021/g58786/g26205/g11613/g61056/g9274	15
GO:0004812	aminoacyl-tRNA ligase activity	9/1428	120/60364	0.0022727	0.0200964	0.0158797	g33990/g26854/g7978/g35340/g25949/g46295/g17275/g8744/g33674	9
GO:0006418	tRNA aminoacylation for protein translation	8/1428	98/60364	0.00231507	0.0203111	0.0160494	g26854/g7978/g35340/g25949/g46295/g17275/g8744/g33674	8
GO:0016813	hydrolase activity, acting on carbon-nitrogen (but not peptide) bonds, in linear amidines	3/1428	12/60364	0.00247682	0.0212325	0.0167775	g13155/g39175/g9185	3
GO:0043335	protein unfolding	3/1428	12/60364	0.00247682	0.0212325	0.0167775	g49962/g61217/g1275	3
GO:0045039	protein insertion into mitochondrial inner membrane	3/1428	12/60364	0.00247682	0.0212325	0.0167775	g20715/g179/g24291	3
GO:0010020	chloroplast fission	4/1428	25/60364	0.0026531	0.0225714	0.0178354	g21576/g42779/g463/g1281	4
GO:0000460	maturation of 5.8S rRNA	5/1428	41/60364	0.00271945	0.0227906	0.0180086	g14103/g55112/g23476/g55714/g18864	5
GO:0009909	regulation of flower development	5/1428	41/60364	0.00271945	0.0227906	0.0180086	g30000/g50362/g50353/g17703/g16707	5
GO:0008878	glucose-1-phosphate adenylyltransferase activity	3/1428	13/60364	0.00316347	0.0261219	0.0206409	g54359/g13324/g59752	3
GO:0033120	positive regulation of RNA splicing	3/1428	13/60364	0.00316347	0.0261219	0.0206409	g15321/g55664/g38294	3
GO:1901566	organonitrogen compound biosynthetic process	10/1428	151/60364	0.00331263	0.0271539	0.0214564	g29134/g62593/g50447/g11866/g54240/g34205/g21484/g25693/g22408/g24795	10
GO:0009707	chloroplast outer membrane	5/1428	43/60364	0.00336017	0.027344	0.0216066	g12819/g23987/g25417/g9483/g38636	5
GO:0016717	oxidoreductase activity, acting on paired donors, with oxidation of a pair of donors resulting in the reduction of molecular oxygen to two molecules of water	5/1428	44/60364	0.00371819	0.0300397	0.0237367	g25506/g24977/g31490/g49940/g21510	5
GO:0000470	maturation of LSU-rRNA	3/1428	14/60364	0.00395581	0.0310655	0.0245473	g55112/g31861/g18133	3
GO:0016554	cytidine to uridine editing	3/1428	14/60364	0.00395581	0.0310655	0.0245473	g59012/g5271/g54268	3
GO:0019707	protein-cysteine S-acyltransferase activity	3/1428	14/60364	0.00395581	0.0310655	0.0245473	g6895/g44735/g44770	3
GO:0042644	chloroplast nucleoid	3/1428	14/60364	0.00395581	0.0310655	0.0245473	g9989/g3967/g11405	3
GO:0099080	supramolecular complex	6/1428	64/60364	0.00404489	0.0315445	0.0249257	g58673/g20278/g3831/g3840/g1634/g25527	6
GO:0016226	iron-sulfur cluster assembly	6/1428	66/60364	0.00471117	0.0364872	0.0288313	g33235/g19690/g25693/g57772/g57664/g33485	6
GO:0031492	nucleosomal DNA binding	3/1428	15/60364	0.00485838	0.0371001	0.0293157	g13164/g5334/g29769	3
GO:0005777	peroxisome	12/1428	212/60364	0.00491706	0.0371001	0.0293157	g25380/g16925/g50425/g43411/g54340/g9263/g4799/g46634/g20026/g24671/g33782/g38327	12
GO:0098869	cellular oxidant detoxification	14/1428	267/60364	0.00493277	0.0371001	0.0293157	g16925/g42084/g58240/g16805/g58267/g25157/g55047/g31194/g34007/g14242/g42372/g29422/g25076/g26139	14
GO:0042274	ribosomal small subunit biogenesis	5/1428	47/60364	0.00495549	0.0371001	0.0293157	g42823/g11431/g47257/g11523/g4371	5
GO:0070013	intracellular organelle lumen	5/1428	47/60364	0.00495549	0.0371001	0.0293157	g35004/g39213/g42475/g38327/g24291	5
GO:0009739	response to gibberellin	4/1428	30/60364	0.00523493	0.0389326	0.0307636	g41108/g52942/g25001/g58360	4
GO:0043229	intracellular organelle	20/1428	449/60364	0.00572884	0.0423256	0.0334447	g39165/g3987/g58673/g16805/g20278/g50566/g3831/g3840/g1852/g13073/g24664/g1634/g13992/g55129/g61406/g20704/g9274/g25820/g25527/g29043	20
GO:0006542	glutamine biosynthetic process	3/1428	16/60364	0.00587521	0.0425411	0.033615	g6895/g44735/g44770	3
GO:0004029	aldehyde dehydrogenase (NAD+) activity	4/1428	31/60364	0.00589948	0.0425411	0.033615	g59925/g26015/g9729/g61406	4
GO:0051289	protein homotetramerization	4/1428	31/60364	0.00589948	0.0425411	0.033615	g29134/g53721/g58060/g20438	4
GO:0019901	protein kinase binding	10/1428	164/60364	0.00590953	0.0425411	0.033615	g54681/g52286/g25790/g34266/g4763/g4758/g4759/g59599/g48035/g11040	10
GO:0006790	sulfur compound metabolic process	7/1428	92/60364	0.0062681	0.0448349	0.0354275	g3990/g4763/g4758/g4759/g39148/g48035/g24671	7
GO:0051287	NAD binding	11/1428	193/60364	0.0065781	0.0467413	0.0369339	g42837/g32551/g23981/g62112/g37944/g56247/g55219/g32562/g25956/g20229/g26014	11
GO:0005504	fatty acid binding	4/1428	32/60364	0.00661787	0.0467413	0.0369339	g7950/g7995/g7958/g55198	4
GO:0000302	response to reactive oxygen species	3/1428	17/60364	0.00700986	0.0475225	0.0375512	g34007/g14242/g26514	3
GO:0004356	glutamine synthetase activity	3/1428	17/60364	0.00700986	0.0475225	0.0375512	g6895/g44735/g44770	3
GO:0009527	plastid outer membrane	3/1428	17/60364	0.00700986	0.0475225	0.0375512	g25417/g9483/g38636	3
GO:0045261	proton-transporting ATP synthase complex, catalytic core F(1)	3/1428	17/60364	0.00700986	0.0475225	0.0375512	g59328/g60183/g33877	3
GO:0071586	CAAX-box protein processing	3/1428	17/60364	0.00700986	0.0475225	0.0375512	g38350/g47266/g56039	3
GO:0080120	CAAX-box protein maturation	3/1428	17/60364	0.00700986	0.0475225	0.0375512	g38350/g47266/g56039	3
GO:0006730	one-carbon metabolic process	5/1428	51/60364	0.0070247	0.0475225	0.0375512	g29134/g15866/g21484/g50803/g9285	5
GO:0008097	5S rRNA binding	4/1428	33/60364	0.00739187	0.0491188	0.0388125	g39165/g5120/g49934/g18864	4
GO:0009627	systemic acquired resistance	4/1428	33/60364	0.00739187	0.0491188	0.0388125	g7950/g7995/g7958/g55198	4
GO:0071806	protein transmembrane transport	4/1428	33/60364	0.00739187	0.0491188	0.0388125	g20715/g5577/g25417/g179	4

## Sheet: Table S4E
Table S4E Analysis of common genes found in PMC, EC, GC, and VC
Names	total	elements
EC GC PMC VC	181			Gene ID	GO_id	GO_term	Go_description	KO_id	KO_name	Pathway_id	Pathway_definition	COG_id	COG_Functional_Categories	NR_hit-name	NR_description	Swiss-Prot_hit-name	Swiss-Prot_description	Domain	Domain_description
		g50214		g765	GO:0003924;GO:0005525;GO:0019904;GO:0045727;GO:0006412;GO:0009507	molecular_function;molecular_function;molecular_function;biological_process;biological_process;cellular_component	MF:GTPase activity;MF:GTP binding;MF:protein domain specific binding;BP:positive regulation of translation;BP:translation;CC:chloroplast	K21594	GUF1			COG0481	M:Cell wall/membrane/envelope biogenesis	XP_019177224.1	PREDICTED: translation factor GUF1 homolog, chloroplastic [Ipomoea nil]	sp|A5B4D2|GUFP_VITVI	Translation factor GUF1 homolog, chloroplastic OS=Vitis vinifera OX=29760 GN=VITISV_013255 PE=3 SV=1	GTP_EFTU;LepA_C;EFG_C;GTP_EFTU_D2;MMR_HSR1;Ras;EFG_III;RF3_C	Elongation factor Tu GTP binding domain;GTP-binding protein LepA C-terminus;Elongation factor G C-terminus;Elongation factor Tu domain 2;50S ribosome-binding GTPase;Ras family;Elongation Factor G, domain III;Class II release factor RF3, C-terminal domain
		g24090		g20458	GO:0006729;GO:0008124	biological_process;molecular_function	BP:tetrahydrobiopterin biosynthetic process;MF:4-alpha-hydroxytetrahydrobiopterin dehydratase activity	K01724	PCBD, phhB	map00790	Folate biosynthesis	ENOG4111XUM	S:Function unknown	XP_031094988.1	probable pterin-4-alpha-carbinolamine dehydratase, chloroplastic [Ipomoea triloba]	sp|Q9LU63|ATP1_ARATH	Probable pterin-4-alpha-carbinolamine dehydratase, chloroplastic OS=Arabidopsis thaliana OX=3702 GN=ATP1 PE=1 SV=1	Pterin_4a	Pterin 4 alpha carbinolamine dehydratase
		g16925		g24655	GO:0009535;GO:0005975;GO:0010598;GO:0030246;GO:0003824;GO:0009773	cellular_component;biological_process;cellular_component;molecular_function;molecular_function;biological_process	CC:chloroplast thylakoid membrane;BP:carbohydrate metabolic process;CC:NAD(P)H dehydrogenase complex (plastoquinone;MF:carbohydrate binding;MF:catalytic activity;BP:photosynthetic electron transport in photosystem I					ENOG410YEUY	S:Function unknown	XP_019186972.1	PREDICTED: photosynthetic NDH subunit of subcomplex B 2, chloroplastic [Ipomoea nil]	sp|Q94AQ8|PNSB2_ARATH	Photosynthetic NDH subunit of subcomplex B 2, chloroplastic OS=Arabidopsis thaliana OX=3702 GN=PNSB2 PE=2 SV=1
		g57671		g29379	GO:0005829;GO:0030388;GO:0006096;GO:0004332	cellular_component;biological_process;biological_process;molecular_function	CC:cytosol;BP:fructose 1,6-bisphosphate metabolic process;BP:glycolytic process;MF:fructose-bisphosphate aldolase activity	K01623	ALDO	map00010;map00030;map00051;map00710	Glycolysis / Gluconeogenesis;Pentose phosphate pathway;Fructose and mannose metabolism;Carbon fixation in photosynthetic organisms	COG3588	S:Function unknown	XP_031110346.1	fructose-bisphosphate aldolase 2, chloroplastic [Ipomoea triloba]	sp|Q944G9|ALFP2_ARATH	Fructose-bisphosphate aldolase 2, chloroplastic OS=Arabidopsis thaliana OX=3702 GN=FBA2 PE=1 SV=2	Glycolytic	Fructose-bisphosphate aldolase class-I
		g60499		g60499	GO:0003735;GO:0006412;GO:0005840	molecular_function;biological_process;cellular_component	MF:structural constituent of ribosome;BP:translation;CC:ribosome	K02909	RP-L31, rpmE	map03010	Ribosome	COG0254	J:Translation, ribosomal structure and biogenesis	XP_031118595.1	50S ribosomal protein L31, chloroplastic [Ipomoea triloba]	sp|Q9FWS4|RK31_ARATH	50S ribosomal protein L31, chloroplastic OS=Arabidopsis thaliana OX=3702 GN=RPL31 PE=2 SV=1	Ribosomal_L31	Ribosomal protein L31
		g27199		g29841
		g765		g44735	GO:0009535;GO:0009941;GO:0022626;GO:0004356;GO:0009570;GO:0005739;GO:0006542;GO:0048046;GO:0046686;GO:0005524	cellular_component;cellular_component;cellular_component;molecular_function;cellular_component;cellular_component;biological_process;cellular_component;biological_process;molecular_function	CC:chloroplast thylakoid membrane;CC:chloroplast envelope;CC:cytosolic ribosome;MF:glutamate-ammonia ligase activity;CC:chloroplast stroma;CC:mitochondrion;BP:glutamine biosynthetic process;CC:apoplast;BP:response to cadmium ion;MF:ATP binding	K01915	glnA, GLUL	map00630;map00220;map00250;map00910	Glyoxylate and dicarboxylate metabolism;Arginine biosynthesis;Alanine, aspartate and glutamate metabolism;Nitrogen metabolism	COG0174	L:Replication, recombination and repair	XP_031121710.1	glutamine synthetase leaf isozyme, chloroplastic [Ipomoea triloba]	sp|P15102|GLNA4_PHAVU	Glutamine synthetase leaf isozyme, chloroplastic OS=Phaseolus vulgaris OX=3885 PE=2 SV=1	Gln-synt_C;Gln-synt_N	Glutamine synthetase, catalytic domain;Glutamine synthetase, beta-Grasp domain
		g19337		g27227	GO:0009733	biological_process	BP:response to auxin	K14488	SAUR	map04075	Plant hormone signal transduction	ENOG410YXA2	S:Function unknown	XP_019153596.1	PREDICTED: auxin-responsive protein SAUR32-like [Ipomoea nil]	sp|Q9ZUZ3|SAU32_ARATH	Auxin-responsive protein SAUR32 OS=Arabidopsis thaliana OX=3702 GN=SAUR32 PE=2 SV=1	Auxin_inducible	Auxin responsive protein
		g9347		g34037	GO:0003824;GO:0050662	molecular_function;molecular_function	MF:catalytic activity;MF:coenzyme binding	K07071	K07071			COG1090	S:Function unknown	XP_031131057.1	epimerase family protein SDR39U1 homolog, chloroplastic [Ipomoea triloba]	sp|Q9SJU9|GC1_ARATH	Epimerase family protein SDR39U1 homolog, chloroplastic OS=Arabidopsis thaliana OX=3702 GN=GC1 PE=2 SV=2	DUF1731;Epimerase;3Beta_HSD	Domain of unknown function (DUF1731;NAD dependent epimerase/dehydratase family;3-beta hydroxysteroid dehydrogenase/isomerase family
		g43386		g876								COG1404	O:Posttranslational modification, protein turnover, chaperones	XP_031116943.1	subtilisin-like protease SBT3.9 isoform X1 [Ipomoea triloba]	sp|Q9MAP7|SBT35_ARATH	Subtilisin-like protease SBT3.5 OS=Arabidopsis thaliana OX=3702 GN=SBT3.5 PE=1 SV=1	Peptidase_S8;fn3_6;Inhibitor_I9	Subtilase family;Fibronectin type-III domain;Peptidase inhibitor I9
		g26747		g19902	GO:0043565;GO:0008270;GO:0006355	molecular_function;molecular_function;biological_process	MF:sequence-specific DNA binding;MF:zinc ion binding;BP:regulation of transcription, DNA-templated					COG5641	O:Posttranslational modification, protein turnover, chaperones	XP_031093887.1	putative GATA transcription factor 22 [Ipomoea triloba]			GATA	GATA zinc finger
		g8787		g9290	GO:0003677	molecular_function	MF:DNA binding					ENOG410YI71	S:Function unknown	XP_031110930.1	remorin-like [Ipomoea triloba]	sp|P93788|REMO_SOLTU	Remorin OS=Solanum tuberosum OX=4113 PE=1 SV=1	Remorin_C	Remorin, C-terminal region
		g20614		g3899	GO:0009658;GO:0005634;GO:0008270;GO:0045893;GO:0003677	biological_process;cellular_component;molecular_function;biological_process;molecular_function	BP:chloroplast organization;CC:nucleus;MF:zinc ion binding;BP:positive regulation of transcription, DNA-templated;MF:DNA binding					ENOG4111PGH	S:Function unknown	XP_031114774.1	uncharacterized protein LOC116018888 [Ipomoea triloba]
		g24316		g54057	GO:0009570;GO:0090391;GO:0009507	cellular_component;biological_process;cellular_component	CC:chloroplast stroma;BP:granum assembly;CC:chloroplast					ENOG4111Q7E	U:Intracellular trafficking, secretion, and vesicular transport	XP_031104656.1	protein LHCP TRANSLOCATION DEFECT [Ipomoea triloba]	sp|Q8VY88|LTD_ARATH	Protein LHCP TRANSLOCATION DEFECT OS=Arabidopsis thaliana OX=3702 GN=LTD PE=1 SV=1
		g30161		g7151	GO:0003735;GO:0006412;GO:0005840	molecular_function;biological_process;cellular_component	MF:structural constituent of ribosome;BP:translation;CC:ribosome	K02902	RP-L28, MRPL28, rpmB	map03010	Ribosome	COG0227	S:Function unknown	XP_031111191.1	50S ribosomal protein L28, chloroplastic [Ipomoea triloba]	sp|P30956|RK28_TOBAC	50S ribosomal protein L28, chloroplastic OS=Nicotiana tabacum OX=4097 GN=RPL28 PE=1 SV=1	Ribosomal_L28	Ribosomal L28 family
		g4732		g4477	GO:0003723	molecular_function	MF:RNA binding					ENOG410YDC7	S:Function unknown	XP_031110977.1	protein TAB2 homolog, chloroplastic [Ipomoea triloba]	sp|Q9SFB3|ATAB2_ARATH	Protein TAB2 homolog, chloroplastic OS=Arabidopsis thaliana OX=3702 GN=ATAB2 PE=2 SV=1	Tab2_like	RNA-binding protein Tab2/Atab2
		g50612		g19337	GO:0071555;GO:0016021;GO:0005576;GO:0005975;GO:0004650	biological_process;cellular_component;cellular_component;biological_process;molecular_function	BP:cell wall organization;CC:integral component of membrane;CC:extracellular region;BP:carbohydrate metabolic process;MF:polygalacturonase activity					ENOG410ZW88	S:Function unknown	XP_031094060.1	uncharacterized protein LOC115998595 [Ipomoea triloba]			DUF3119	Protein of unknown function (DUF3119
		g13219		g54887								ENOG410Y0EY	S:Function unknown	XP_031105982.1	uncharacterized protein LOC116010638 [Ipomoea triloba]
		g60730		g37622	GO:0004842	molecular_function	MF:ubiquitin-protein transferase activity					ENOG410YC2C	O:Posttranslational modification, protein turnover, chaperones	XP_031130467.1	U-box domain-containing protein 17 [Ipomoea triloba]	sp|Q9C7R6|PUB17_ARATH	U-box domain-containing protein 17 OS=Arabidopsis thaliana OX=3702 GN=PUB17 PE=2 SV=1	U-box;Arm;zf-Nse;zf-NOSIP	U-box domain;Armadillo/beta-catenin-like repeat;Zinc-finger of the MIZ type in Nse subunit;Zinc-finger of nitric oxide synthase-interacting protein
		g62593		g43136	GO:0003723	molecular_function	MF:RNA binding	K13195	CIRBP			ENOG410XZHK;COG0724	S:Function unknown;S:Function unknown	XP_031096497.1	glycine-rich RNA-binding protein-like isoform X1 [Ipomoea triloba]	sp|P49310|GRP1_SINAL	Glycine-rich RNA-binding protein GRP1A OS=Sinapis alba OX=3728 PE=2 SV=1	RRM_1;RRM_7	RNA recognition motif. (a.k.a. RRM, RBD, or RNP domain;RNA recognition motif
		g10265		g59369	GO:0046872;GO:0051213;GO:0016491	molecular_function;molecular_function;molecular_function	MF:metal ion binding;MF:dioxygenase activity;MF:oxidoreductase activity	K05933	E1.14.17.4	map00270	Cysteine and methionine metabolism	COG3491	S:Function unknown	XP_031127217.1	1-aminocyclopropane-1-carboxylate oxidase 3-like [Ipomoea triloba]	sp|P31237|ACCO_ACTDE	1-aminocyclopropane-1-carboxylate oxidase OS=Actinidia deliciosa OX=3627 GN=ACO PE=2 SV=1	2OG-FeII_Oxy;DIOX_N	2OG-Fe(II) oxygenase superfamily;non-haem dioxygenase in morphine synthesis N-terminal
		g8434		g49933								ENOG410ZFSV;ENOG410ZFG5	S:Function unknown;S:Function unknown	XP_031123519.1	uncharacterized protein LOC116026189 [Ipomoea triloba]
		g46681		g16925	GO:0046872;GO:0042744;GO:0006979;GO:0020037;GO:0004096	molecular_function;biological_process;biological_process;molecular_function;molecular_function	MF:metal ion binding;BP:hydrogen peroxide catabolic process;BP:response to oxidative stress;MF:heme binding;MF:catalase activity	K03781	katE, CAT, catB, srpA	map00630;map04016;map00380;map04146	Glyoxylate and dicarboxylate metabolism;MAPK signaling pathway - plant;Tryptophan metabolism;Peroxisome	COG0753	T:Signal transduction mechanisms	XP_031094084.1	catalase isozyme 1 [Ipomoea triloba]	sp|P17598|CATA1_GOSHI	Catalase isozyme 1 OS=Gossypium hirsutum OX=3635 GN=CAT1 PE=2 SV=2	Catalase;Catalase-rel	Catalase;Catalase-related immune-responsive
		g16912		g58903	GO:0005737;GO:0042132;GO:0005975;GO:0030388;GO:0005986;GO:0006000;GO:0006002;GO:0006094	cellular_component;molecular_function;biological_process;biological_process;biological_process;biological_process;biological_process;biological_process	CC:cytoplasm;MF:fructose 1,6-bisphosphate 1-phosphatase activity;BP:carbohydrate metabolic process;BP:fructose 1,6-bisphosphate metabolic process;BP:sucrose biosynthetic process;BP:fructose metabolic process;BP:fructose 6-phosphate metabolic process;BP:gluconeogenesis	K03841	FBP, fbp	map00010;map00030;map00051;map00710	Glycolysis / Gluconeogenesis;Pentose phosphate pathway;Fructose and mannose metabolism;Carbon fixation in photosynthetic organisms	COG0158	S:Function unknown	XP_031128891.1	fructose-1,6-bisphosphatase, chloroplastic-like [Ipomoea triloba]	sp|P25851|F16P1_ARATH	Fructose-1,6-bisphosphatase 1, chloroplastic OS=Arabidopsis thaliana OX=3702 GN=CFBP1 PE=1 SV=2	FBPase;FBPase_C	Fructose-1-6-bisphosphatase, N-terminal domain;Fructose-1-6-bisphosphatase, C-terminal domain
		g36358		g3803	GO:0005737;GO:0048046;GO:0042132;GO:0016791;GO:0009941;GO:0009570;GO:0009579;GO:0005986;GO:0042742;GO:0030388;GO:0050278;GO:0005975;GO:0019252;GO:0006000;GO:0006002;GO:0006094	cellular_component;cellular_component;molecular_function;molecular_function;cellular_component;cellular_component;cellular_component;biological_process;biological_process;biological_process;molecular_function;biological_process;biological_process;biological_process;biological_process;biological_process	CC:cytoplasm;CC:apoplast;MF:fructose 1,6-bisphosphate 1-phosphatase activity;MF:phosphatase activity;CC:chloroplast envelope;CC:chloroplast stroma;CC:thylakoid;BP:sucrose biosynthetic process;BP:defense response to bacterium;BP:fructose 1,6-bisphosphate metabolic process;MF:sedoheptulose-bisphosphatase activity;BP:carbohydrate metabolic process;BP:starch biosynthetic process;BP:fructose metabolic…	K01100	E3.1.3.37	map00710	Carbon fixation in photosynthetic organisms	COG0158	G:Carbohydrate transport and metabolism	XP_031114725.1	sedoheptulose-1,7-bisphosphatase, chloroplastic-like [Ipomoea triloba]	sp|P46283|S17P_ARATH	Sedoheptulose-1,7-bisphosphatase, chloroplastic OS=Arabidopsis thaliana OX=3702 GN=At3g55800 PE=2 SV=1	FBPase;FBPase_C	Fructose-1-6-bisphosphatase, N-terminal domain;Fructose-1-6-bisphosphatase, C-terminal domain
		g34127		g12843	GO:0009535;GO:0005840;GO:0009570;GO:0003735;GO:0032544;GO:0006412	cellular_component;cellular_component;cellular_component;molecular_function;biological_process;biological_process	CC:chloroplast thylakoid membrane;CC:ribosome;CC:chloroplast stroma;MF:structural constituent of ribosome;BP:plastid translation;BP:translation	K19032	PSRP3			ENOG4111VGA	S:Function unknown	XP_031098204.1	30S ribosomal protein 3-1, chloroplastic isoform X1 [Ipomoea triloba]	sp|Q9SX22|RRP31_ARATH	30S ribosomal protein 3-1, chloroplastic OS=Arabidopsis thaliana OX=3702 GN=At1g68590 PE=2 SV=1	PSRP-3_Ycf65	Plastid and cyanobacterial ribosomal protein (PSRP-3 / Ycf65
		g19971		g25380	GO:0044375;GO:0005779;GO:0005778;GO:0016559	biological_process;cellular_component;cellular_component;biological_process	BP:regulation of peroxisome size;CC:integral component of peroxisomal membrane;CC:peroxisomal membrane;BP:peroxisome fission					ENOG4111NS6	S:Function unknown	XP_019191744.1	PREDICTED: uncharacterized protein LOC109186275 [Ipomoea nil]	sp|Q01IH3|PX114_ORYSI	Peroxisomal membrane protein 11-4 OS=Oryza sativa subsp. indica OX=39946 GN=PEX11-4 PE=2 SV=1	PEX11;F-box-like;F-box	Peroxisomal biogenesis factor 11 (PEX11;F-box-like;F-box domain
		g21576		g21133	GO:0003735;GO:0005763;GO:0015935;GO:0003723;GO:0006412	molecular_function;cellular_component;cellular_component;molecular_function;biological_process	MF:structural constituent of ribosome;CC:mitochondrial small ribosomal subunit;CC:small ribosomal subunit;MF:RNA binding;BP:translation	K02988	RP-S5, MRPS5, rpsE	map03010	Ribosome	COG0098	V:Defense mechanisms	XP_031104109.1	30S ribosomal protein S5, chloroplastic [Ipomoea triloba]	sp|P93014|RR5_ARATH	30S ribosomal protein S5, chloroplastic OS=Arabidopsis thaliana OX=3702 GN=rps5 PE=2 SV=1	Ribosomal_S5_C;Ribosomal_S5	Ribosomal protein S5, C-terminal domain;Ribosomal protein S5, N-terminal domain
		g49063		g20189	GO:0009507	cellular_component	CC:chloroplast					ENOG410YKCB	S:Function unknown	XP_019151354.1	PREDICTED: rubisco accumulation factor 1.1, chloroplastic [Ipomoea nil]	sp|Q9SR19|RAF2_ARATH	Rubisco accumulation factor 1.2, chloroplastic OS=Arabidopsis thaliana OX=3702 GN=RAF1.2 PE=1 SV=1	RuBisCo_chap_C;Raf1_N	Rubisco Assembly chaperone C-terminal domain;Rubisco accumulation factor 1 alpha helical domain
		g2456		g50612
		g42791		g27011	GO:0009534;GO:0016021;GO:0015995;GO:0046408	cellular_component;cellular_component;biological_process;molecular_function	CC:chloroplast thylakoid;CC:integral component of membrane;BP:chlorophyll biosynthetic process;MF:chlorophyll synthetase activity	K04040	chlG, bchG	map00860	Porphyrin and chlorophyll metabolism	COG0382	H:Coenzyme transport and metabolism	XP_031107170.1	chlorophyll synthase, chloroplastic-like [Ipomoea triloba]	sp|Q5W6H5|CHLG_ORYSJ	Chlorophyll synthase, chloroplastic OS=Oryza sativa subsp. japonica OX=39947 GN=CHLG PE=2 SV=1	UbiA	UbiA prenyltransferase family
		g13238		g47140	GO:0015934;GO:0005840;GO:0022625;GO:0003735;GO:0006412;GO:0009507	cellular_component;cellular_component;cellular_component;molecular_function;biological_process;cellular_component	CC:large ribosomal subunit;CC:ribosome;CC:cytosolic large ribosomal subunit;MF:structural constituent of ribosome;BP:translation;CC:chloroplast	K02916	RP-L35, MRPL35, rpmI	map03010	Ribosome	COG0291	J:Translation, ribosomal structure and biogenesis	XP_031121646.1	50S ribosomal protein L35, chloroplastic [Ipomoea triloba]	sp|P23326|RK35_SPIOL	50S ribosomal protein L35, chloroplastic OS=Spinacia oleracea OX=3562 GN=RPL35 PE=1 SV=1	Ribosomal_L35p	Ribosomal protein L35
		g20672		g8432	GO:0009535;GO:0016021;GO:0006979;GO:0009507	cellular_component;cellular_component;biological_process;cellular_component	CC:chloroplast thylakoid membrane;CC:integral component of membrane;BP:response to oxidative stress;CC:chloroplast					ENOG41127XZ	S:Function unknown	XP_031111154.1	photosynthetic NDH subunit of subcomplex B 5, chloroplastic [Ipomoea triloba]	sp|Q9FG89|PNSB5_ARATH	Photosynthetic NDH subunit of subcomplex B 5, chloroplastic OS=Arabidopsis thaliana OX=3702 GN=PNSB5 PE=2 SV=1
		g23739		g20614	GO:0042626;GO:0016021;GO:0016887;GO:0005886;GO:0055085;GO:0005524	molecular_function;cellular_component;molecular_function;cellular_component;biological_process;molecular_function	MF:ATPase activity, coupled to transmembrane movement of substances;CC:integral component of membrane;MF:ATPase activity;CC:plasma membrane;BP:transmembrane transport;MF:ATP binding					COG1131	S:Function unknown	XP_031093688.1	ABC transporter G family member 8 [Ipomoea triloba]	sp|Q9FLX5|AB8G_ARATH	ABC transporter G family member 8 OS=Arabidopsis thaliana OX=3702 GN=ABCG8 PE=2 SV=1	ABC2_membrane;DUF3488	ABC-2 type transporter;Domain of unknown function (DUF3488
		g21133		g43386	GO:0009570	cellular_component	CC:chloroplast stroma					ENOG41129PA	S:Function unknown	XP_031091091.1	uncharacterized protein LOC115996088 [Ipomoea triloba]
		g33402		g4591	GO:0000160	biological_process	BP:phosphorelay signal transduction system					COG0667	V:Defense mechanisms	XP_031110835.1	flagellar radial spoke protein 5 isoform X1 [Ipomoea triloba]	sp|Q27YU7|RSP5_CHLRE	Flagellar radial spoke protein 5 OS=Chlamydomonas reinhardtii OX=3055 GN=RSP5 PE=1 SV=1	Aldo_ket_red	Aldo/keto reductase family
		g44735		g9018	GO:0009941;GO:0005840;GO:0022625;GO:0009570;GO:0005829;GO:0019843;GO:0003735;GO:0006412	cellular_component;cellular_component;cellular_component;cellular_component;cellular_component;molecular_function;molecular_function;biological_process	CC:chloroplast envelope;CC:ribosome;CC:cytosolic large ribosomal subunit;CC:chloroplast stroma;CC:cytosol;MF:rRNA binding;MF:structural constituent of ribosome;BP:translation	K02906	RP-L3, MRPL3, rplC	map03010	Ribosome	COG0087	S:Function unknown	XP_031114108.1	50S ribosomal protein L3, chloroplastic [Ipomoea triloba]	sp|O80360|RK3_TOBAC	50S ribosomal protein L3, chloroplastic (Fragment) OS=Nicotiana tabacum OX=4097 GN=RPL3 PE=2 SV=1	Ribosomal_L3	Ribosomal protein L3
		g49608		g5655	GO:0016592;GO:0016021;GO:0006357;GO:0003712;GO:0005347	cellular_component;cellular_component;biological_process;molecular_function;molecular_function	CC:mediator complex;CC:integral component of membrane;BP:regulation of transcription from RNA polymerase II promoter;MF:transcription cofactor activity;MF:ATP transmembrane transporter activity	K15104	SLC25A11, OGC			ENOG410XQHU	S:Function unknown	XP_031112389.1	mitochondrial dicarboxylate/tricarboxylate transporter DTC [Ipomoea triloba]	sp|Q9C5M0|DTC_ARATH	Mitochondrial dicarboxylate/tricarboxylate transporter DTC OS=Arabidopsis thaliana OX=3702 GN=DTC PE=1 SV=1	Mito_carr	Mitochondrial carrier protein
		g38334		g25157	GO:0005737;GO:0005623;GO:0004601;GO:0042744;GO:0008379;GO:0034599;GO:0051920;GO:0045454	cellular_component;cellular_component;molecular_function;biological_process;molecular_function;biological_process;molecular_function;biological_process	CC:cytoplasm;CC:cell;MF:peroxidase activity;BP:hydrogen peroxide catabolic process;MF:thioredoxin peroxidase activity;BP:cellular response to oxidative stress;MF:peroxiredoxin activity;BP:cell redox homeostasis					COG0678	O:Posttranslational modification, protein turnover, chaperones	XP_031102265.1	peroxiredoxin-2E-1, chloroplastic [Ipomoea triloba]	sp|Q69TY4|PR2E1_ORYSJ	Peroxiredoxin-2E-1, chloroplastic OS=Oryza sativa subsp. japonica OX=39947 GN=PRXIIE-1 PE=2 SV=1	Redoxin;AhpC-TSA	Redoxin;AhpC/TSA family
		g20149		g55622	GO:0032790;GO:0003746;GO:0009507;GO:0003924;GO:0005525	biological_process;molecular_function;cellular_component;molecular_function;molecular_function	BP:ribosome disassembly;MF:translation elongation factor activity;CC:chloroplast;MF:GTPase activity;MF:GTP binding	K02355	fusA, GFM, EFG			COG0480	J:Translation, ribosomal structure and biogenesis	XP_031126905.1	elongation factor G-2, chloroplastic-like [Ipomoea triloba]	sp|P34811|EFGC1_SOYBN	Elongation factor G-1, chloroplastic OS=Glycine max OX=3847 GN=fusA1 PE=3 SV=2	GTP_EFTU;EFG_IV;EFG_III;EFG_C;GTP_EFTU_D2;RF3_C	Elongation factor Tu GTP binding domain;Elongation factor G, domain IV;Elongation Factor G, domain III;Elongation factor G C-terminus;Elongation factor Tu domain 2;Class II release factor RF3, C-terminal domain
		g16805		g49608	GO:0050662;GO:0003978;GO:0033499;GO:0003824;GO:0019388;GO:0005829	molecular_function;molecular_function;biological_process;molecular_function;biological_process;cellular_component	MF:coenzyme binding;MF:UDP-glucose 4-epimerase activity;BP:galactose catabolic process via UDP-galactose;MF:catalytic activity;BP:galactose catabolic process;CC:cytosol					ENOG410ZXC4	S:Function unknown	XP_031121964.1	chloroplast stem-loop binding protein of 41 kDa a, chloroplastic [Ipomoea triloba]	sp|Q9LYA9|CP41A_ARATH	Chloroplast stem-loop binding protein of 41 kDa a, chloroplastic OS=Arabidopsis thaliana OX=3702 GN=CSP41A PE=1 SV=1	Epimerase;NAD_binding_10	NAD dependent epimerase/dehydratase family;NAD(P)H-binding
		g34092		g24316	GO:0009579;GO:0009570;GO:0005524;GO:0046863;GO:0042802;GO:0009507	cellular_component;cellular_component;molecular_function;molecular_function;molecular_function;cellular_component	CC:thylakoid;CC:chloroplast stroma;MF:ATP binding;MF:ribulose-1,5-bisphosphate carboxylase/oxygenase activator activity;MF:identical protein binding;CC:chloroplast					COG1222	O:Posttranslational modification, protein turnover, chaperones	AFU50381.1	chloroplast ribulose bisphosphate carboxylase/oxygenase activase small isoform [Ipomoea batatas]	sp|Q40460|RCA1_TOBAC	Ribulose bisphosphate carboxylase/oxygenase activase 1, chloroplastic OS=Nicotiana tabacum OX=4097 PE=1 SV=1	AAA;Torsin	ATPase family associated with various cellular activities (AAA;Torsin
		g337		g5752	GO:0003735;GO:0016021;GO:0005840;GO:0006412;GO:0019843	molecular_function;cellular_component;cellular_component;biological_process;molecular_function	MF:structural constituent of ribosome;CC:integral component of membrane;CC:ribosome;BP:translation;MF:rRNA binding	K02933	RP-L6, MRPL6, rplF	map03010	Ribosome	COG0097	S:Function unknown	XP_031113889.1	50S ribosomal protein L6, chloroplastic [Ipomoea triloba]	sp|O23049|RK6_ARATH	50S ribosomal protein L6, chloroplastic OS=Arabidopsis thaliana OX=3702 GN=RPL6 PE=2 SV=1	Ribosomal_L6	Ribosomal protein L6
		g42642		g41081	GO:0016740	molecular_function	MF:transferase activity					COG1236;ENOG410Z2IC	J:Translation, ribosomal structure and biogenesis;S:Function unknown	XP_031125471.1	uncharacterized protein LOC116027848 [Ipomoea triloba]
		g43239		g33458	GO:0009570;GO:0016787;GO:0009941	cellular_component;molecular_function;cellular_component	CC:chloroplast stroma;MF:hydrolase activity;CC:chloroplast envelope					COG0637	S:Function unknown	XP_031092962.1	CBBY-like protein [Ipomoea triloba]	sp|Q94K71|CBBY_ARATH	CBBY-like protein OS=Arabidopsis thaliana OX=3702 GN=CBBY PE=1 SV=1	HAD_2;Hydrolase;Hydrolase_like	Haloacid dehalogenase-like hydrolase;haloacid dehalogenase-like hydrolase;HAD-hyrolase-like
		g5752		g34206	GO:0006099;GO:0030060;GO:0005975;GO:0006108;GO:0019752	biological_process;molecular_function;biological_process;biological_process;biological_process	BP:tricarboxylic acid cycle;MF:L-malate dehydrogenase activity;BP:carbohydrate metabolic process;BP:malate metabolic process;BP:carboxylic acid metabolic process	K00026	MDH2	map00020;map00630;map00620;map00710;map00270	Citrate cycle (TCA cycle;Glyoxylate and dicarboxylate metabolism;Pyruvate metabolism;Carbon fixation in photosynthetic organisms;Cysteine and methionine metabolism	COG0039	C:Energy production and conversion	XP_031130302.1	malate dehydrogenase, glyoxysomal-like [Ipomoea triloba]	sp|P19446|MDHG_CITLA	Malate dehydrogenase, glyoxysomal OS=Citrullus lanatus OX=3654 PE=1 SV=1	Ldh_1_C;Ldh_1_N;3Beta_HSD	lactate/malate dehydrogenase, alpha/beta C-terminal domain;lactate/malate dehydrogenase, NAD binding domain;3-beta hydroxysteroid dehydrogenase/isomerase family
		g9963		g19479	GO:0070181;GO:0005840;GO:0019843;GO:0003735;GO:0003746;GO:0006412;GO:0022627	molecular_function;cellular_component;molecular_function;molecular_function;molecular_function;biological_process;cellular_component	MF:small ribosomal subunit rRNA binding;CC:ribosome;MF:rRNA binding;MF:structural constituent of ribosome;MF:translation elongation factor activity;BP:translation;CC:cytosolic small ribosomal subunit	K02990	RP-S6, MRPS6, rpsF	map03010	Ribosome	ENOG4111S82	S:Function unknown	XP_031095640.1	30S ribosomal protein S6 alpha, chloroplastic-like [Ipomoea triloba]	sp|P82403|RR6_SPIOL	30S ribosomal protein S6 alpha, chloroplastic OS=Spinacia oleracea OX=3562 GN=RPS6 PE=1 SV=3	Ribosomal_S6	Ribosomal protein S6
		g37622		g16912	GO:0016787	molecular_function	MF:hydrolase activity					COG0637	S:Function unknown	XP_019182542.1	PREDICTED: haloacid dehalogenase-like hydrolase domain-containing protein At4g39970 [Ipomoea nil]	sp|Q680K2|GPPL1_ARATH	Haloacid dehalogenase-like hydrolase domain-containing protein At4g39970 OS=Arabidopsis thaliana OX=3702 GN=At4g39970 PE=2 SV=1	HAD_2;Hydrolase	Haloacid dehalogenase-like hydrolase;haloacid dehalogenase-like hydrolase
		g17905		g36358	GO:0005794;GO:0006644;GO:0016021;GO:0050482;GO:0016042;GO:0005576;GO:0005509;GO:0008289;GO:0102567;GO:0102568;GO:0004623	cellular_component;biological_process;cellular_component;biological_process;biological_process;cellular_component;molecular_function;molecular_function;molecular_function;molecular_function;molecular_function	CC:Golgi apparatus;BP:phospholipid metabolic process;CC:integral component of membrane;BP:arachidonic acid secretion;BP:lipid catabolic process;CC:extracellular region;MF:calcium ion binding;MF:lipid binding;MF:phospholipase A2 activity (consuming 1,2-dipalmitoylphosphatidylcholine;MF:phospholipase A2 activity consuming 1,2-dioleoylphosphatidylethanolamine;MF:phospholipase A2 activity	K01047	PLA2G, SPLA2	map00565;map00564;map00592;map00591;map00590	Ether lipid metabolism;Glycerophospholipid metabolism;alpha-Linolenic acid metabolism;Linoleic acid metabolism;Arachidonic acid metabolism	ENOG410YKKM	I:Lipid transport and metabolism	XP_031130201.1	phospholipase A2-alpha-like [Ipomoea triloba]	sp|Q8S8N6|PLA2A_ARATH	Phospholipase A2-alpha OS=Arabidopsis thaliana OX=3702 GN=PLA2-ALPHA PE=1 SV=1
		g54082		g9347	GO:0009941;GO:0022626;GO:0005840;GO:0009570;GO:0003735;GO:0006412	cellular_component;cellular_component;cellular_component;cellular_component;molecular_function;biological_process	CC:chloroplast envelope;CC:cytosolic ribosome;CC:ribosome;CC:chloroplast stroma;MF:structural constituent of ribosome;BP:translation	K02931	RP-L5, MRPL5, rplE	map03010	Ribosome	COG0094	S:Function unknown	XP_031111258.1	50S ribosomal protein L5, chloroplastic [Ipomoea triloba]	sp|O04603|RK5_ARATH	50S ribosomal protein L5, chloroplastic OS=Arabidopsis thaliana OX=3702 GN=RPL5 PE=2 SV=1	Ribosomal_L5;Ribosomal_L5_C	Ribosomal protein L5;ribosomal L5P family C-terminus
		g17459		g603	GO:0061929;GO:0016740;GO:0005829	molecular_function;molecular_function;cellular_component	MF:gamma-glutamylaminecyclotransferase activity;MF:transferase activity;CC:cytosol	K19761	GGACT			ENOG4111N8W	S:Function unknown	XP_031116369.1	putative gamma-glutamylcyclotransferase At3g02910 [Ipomoea triloba]	sp|Q9M8T3|Y2910_ARATH	Putative gamma-glutamylcyclotransferase At3g02910 OS=Arabidopsis thaliana OX=3702 GN=At3g02910 PE=2 SV=2	GGACT	Gamma-glutamyl cyclotransferase, AIG2-like
		g33235		g42642	GO:0003824;GO:0016021;GO:0050662	molecular_function;cellular_component;molecular_function	MF:catalytic activity;CC:integral component of membrane;MF:coenzyme binding					ENOG410XQQI	S:Function unknown	XP_031122276.1	chloroplast stem-loop binding protein of 41 kDa b, chloroplastic [Ipomoea triloba]	sp|Q9SA52|CP41B_ARATH	Chloroplast stem-loop binding protein of 41 kDa b, chloroplastic OS=Arabidopsis thaliana OX=3702 GN=CSP41B PE=1 SV=1	Epimerase;GDP_Man_Dehyd;NAD_binding_10	NAD dependent epimerase/dehydratase family;GDP-mannose 4,6 dehydratase;NAD(P)H-binding
		g33901		g54897	GO:0016021;GO:0009507	cellular_component;cellular_component	CC:integral component of membrane;CC:chloroplast					ENOG411207M	S:Function unknown	XP_031099860.1	uncharacterized protein LOC116004061 [Ipomoea triloba]
		g5655		g34084	GO:0098807	cellular_component	CC:chloroplast thylakoid membrane protein complex					COG0702	S:Function unknown	XP_031132251.1	protein TIC 62, chloroplastic [Ipomoea triloba]	sp|Q8SKU2|TIC62_PEA	Protein TIC 62, chloroplastic OS=Pisum sativum OX=3888 GN=TIC62 PE=1 SV=2	NAD_binding_10;NmrA;3Beta_HSD;Epimerase	NAD(P)H-binding;NmrA-like family;3-beta hydroxysteroid dehydrogenase/isomerase family;NAD dependent epimerase/dehydratase family
		g400		g38237	GO:0032790;GO:0003746;GO:0009507;GO:0003924;GO:0005525	biological_process;molecular_function;cellular_component;molecular_function;molecular_function	BP:ribosome disassembly;MF:translation elongation factor activity;CC:chloroplast;MF:GTPase activity;MF:GTP binding	K02355	fusA, GFM, EFG			COG0480	S:Function unknown	XP_031125687.1	elongation factor G-2, chloroplastic-like [Ipomoea triloba]	sp|P34811|EFGC1_SOYBN	Elongation factor G-1, chloroplastic OS=Glycine max OX=3847 GN=fusA1 PE=3 SV=2	GTP_EFTU;EFG_III;EFG_IV;EFG_C;GTP_EFTU_D2;RF3_C	Elongation factor Tu GTP binding domain;Elongation Factor G, domain III;Elongation factor G, domain IV;Elongation factor G C-terminus;Elongation factor Tu domain 2;Class II release factor RF3, C-terminal domain
		g6382		g26747	GO:0016021;GO:0015292;GO:0005739;GO:0051560	cellular_component;molecular_function;cellular_component;biological_process	CC:integral component of membrane;MF:uniporter activity;CC:mitochondrion;BP:mitochondrial calcium ion homeostasis	K20858	MCU			ENOG410Y3YU	I:Lipid transport and metabolism	XP_031107587.1	calcium uniporter protein 5, mitochondrial-like [Ipomoea triloba]	sp|Q8VYR0|MCU5_ARATH	Calcium uniporter protein 5, mitochondrial OS=Arabidopsis thaliana OX=3702 GN=At1g57610 PE=2 SV=1	MCU	Mitochondrial calcium uniporter
		g13303		g59719	GO:0016021;GO:0009512	cellular_component;cellular_component	CC:integral component of membrane;CC:cytochrome b6f complex					ENOG41119B4;ENOG410Y2Z3	S:Function unknown;S:Function unknown	XP_031125887.1	uncharacterized protein LOC116028339 [Ipomoea triloba]	sp|P80883|PETM_SPIOL	Cytochrome b6-f complex subunit 7 (Fragment) OS=Spinacia oleracea OX=3562 GN=petM PE=1 SV=1	PetM	PetM family of cytochrome b6f complex subunit 7
		g43460		g33901	GO:0009579;GO:0009535;GO:0016021	cellular_component;cellular_component;cellular_component	CC:thylakoid;CC:chloroplast thylakoid membrane;CC:integral component of membrane					ENOG4112195	S:Function unknown	XP_031090742.1	protein CURVATURE THYLAKOID 1B, chloroplastic [Ipomoea triloba]	sp|Q8LCA1|CUT1B_ARATH	Protein CURVATURE THYLAKOID 1B, chloroplastic OS=Arabidopsis thaliana OX=3702 GN=CURT1B PE=1 SV=2	CAAD	CAAD domains of cyanobacterial aminoacyl-tRNA synthetase
		g34017		g4086	GO:0005737;GO:0008080	cellular_component;molecular_function	CC:cytoplasm;MF:N-acetyltransferase activity					ENOG4111M9W	S:Function unknown	XP_031114685.1	uncharacterized protein LOC116018820 [Ipomoea triloba]			Acetyltransf_1;Acetyltransf_7;Acetyltransf_10	Acetyltransferase (GNAT) family;Acetyltransferase (GNAT) domain;Acetyltransferase (GNAT) domain
		g31185		g37937	GO:0009535;GO:0009941;GO:0009496;GO:0016021;GO:0051537;GO:0008121;GO:0010196;GO:0042742;GO:0080167;GO:0045158;GO:0005886;GO:0046872;GO:0016491	cellular_component;cellular_component;molecular_function;cellular_component;molecular_function;molecular_function;biological_process;biological_process;biological_process;molecular_function;cellular_component;molecular_function;molecular_function	CC:chloroplast thylakoid membrane;CC:chloroplast envelope;MF:plastoquinol--plastocyanin reductase activity;CC:integral component of membrane;MF:2 iron, 2 sulfur cluster binding;MF:ubiquinol-cytochrome-c reductase activity;BP:nonphotochemical quenching;BP:defense response to bacterium;BP:response to karrikin;MF:electron transporter, transferring electrons within cytochrome b6/f complex of photosys…	K02636	petC	map00195	Photosynthesis	COG0723	K:Transcription	XP_031131343.1	cytochrome b6-f complex iron-sulfur subunit 1, chloroplastic [Ipomoea triloba]	sp|P30361|UCRIA_TOBAC	Cytochrome b6-f complex iron-sulfur subunit 1, chloroplastic OS=Nicotiana tabacum OX=4097 GN=petC1 PE=2 SV=2	Rieske	Rieske [2Fe-2S] domain
		g55622		g49063	GO:0009579;GO:0015995;GO:0048529;GO:0009507	cellular_component;biological_process;molecular_function;cellular_component	CC:thylakoid;BP:chlorophyll biosynthetic process;MF:magnesium-protoporphyrin IX monomethyl ester (oxidative) cyclase activity;CC:chloroplast					ENOG4111TQT	S:Function unknown	XP_031123095.1	uncharacterized protein LOC116025866 isoform X1 [Ipomoea triloba]	sp|P72777|YC54L_SYNY3	Ycf54-like protein OS=Synechocystis sp. (strain PCC 6803 / Kazusa) OX=1111708 GN=slr1780 PE=1 SV=1	Ycf54	Protein of unknown function (DUF2488
		g17223		g39165	GO:0009941;GO:0005840;GO:0005730;GO:0009570;GO:0003735;GO:0006412	cellular_component;cellular_component;cellular_component;cellular_component;molecular_function;biological_process	CC:chloroplast envelope;CC:ribosome;CC:nucleolus;CC:chloroplast stroma;MF:structural constituent of ribosome;BP:translation	K02881	RP-L18, MRPL18, rplR	map03010	Ribosome	COG0256	S:Function unknown	XP_031123892.1	50S ribosomal protein L18, chloroplastic-like [Ipomoea triloba]	sp|P82195|RK18_SPIOL	50S ribosomal protein L18, chloroplastic OS=Spinacia oleracea OX=3562 GN=RPL18 PE=1 SV=3	Ribosomal_L18p	Ribosomal L18 of archaea, bacteria, mitoch. and chloroplast
		g43775		g17481	GO:0015976;GO:0004089;GO:0008270;GO:0009440	biological_process;molecular_function;molecular_function;biological_process	BP:carbon utilization;MF:carbonate dehydratase activity;MF:zinc ion binding;BP:cyanate catabolic process	K01673	cynT, can	map00910	Nitrogen metabolism	COG0288	T:Signal transduction mechanisms	XP_031096308.1	carbonic anhydrase 2-like [Ipomoea triloba]	sp|P16016|CAHC_SPIOL	Carbonic anhydrase, chloroplastic OS=Spinacia oleracea OX=3562 PE=1 SV=2	Pro_CA	Carbonic anhydrase
		g13864		g20149	GO:0009522;GO:0015979	cellular_component;biological_process	CC:photosystem I;BP:photosynthesis					ENOG410XY0C	S:Function unknown	XP_031095885.1	uncharacterized protein LOC116000031 [Ipomoea triloba]
		g39004		g50214	GO:0016655;GO:0016021	molecular_function;cellular_component	MF:oxidoreductase activity, acting on NAD(P)H, quinone or similar compound as acceptor;CC:integral component of membrane					ENOG4112C5D	S:Function unknown	XP_031123011.1	NAD(P)H-quinone oxidoreductase subunit L, chloroplastic [Ipomoea triloba]	sp|Q9CAC5|NDHL_ARATH	NAD(P)H-quinone oxidoreductase subunit L, chloroplastic OS=Arabidopsis thaliana OX=3702 GN=ndhL PE=2 SV=1	NdhL	NADH dehydrogenase transmembrane subunit
		g31592		g4398	GO:0015995;GO:0009507;GO:0015979;GO:0005524;GO:0016851	biological_process;cellular_component;biological_process;molecular_function;molecular_function	BP:chlorophyll biosynthetic process;CC:chloroplast;BP:photosynthesis;MF:ATP binding;MF:magnesium chelatase activity	K03404	chlD, bchD	map00860	Porphyrin and chlorophyll metabolism	COG1240	H:Coenzyme transport and metabolism	XP_031112333.1	magnesium-chelatase subunit ChlD, chloroplastic [Ipomoea triloba]	sp|O24133|CHLD_TOBAC	Magnesium-chelatase subunit ChlD, chloroplastic OS=Nicotiana tabacum OX=4097 GN=CHLD PE=2 SV=1	AAA_lid_2;Mg_chelatase;VWA_2;Sigma54_activat;MCM;AAA_5;RXT2_N	AAA lid domain;Magnesium chelatase, subunit ChlI;von Willebrand factor type A domain;Sigma-54 interaction domain;MCM P-loop domain;AAA domain (dynein-related subfamily;RXT2-like, N-terminal
		g43136		g60543	GO:0009535;GO:0004164;GO:0010206;GO:0009534;GO:0017183;GO:0009570;GO:0016021;GO:0005739;GO:0003756;GO:0046872;GO:0009507	cellular_component;molecular_function;biological_process;cellular_component;biological_process;cellular_component;cellular_component;cellular_component;molecular_function;molecular_function;cellular_component	CC:chloroplast thylakoid membrane;MF:diphthine synthase activity;BP:photosystem II repair;CC:chloroplast thylakoid;BP:peptidyl-diphthamide biosynthetic process from peptidyl-histidine;CC:chloroplast stroma;CC:integral component of membrane;CC:mitochondrion;MF:protein disulfide isomerase activity;MF:metal ion binding;CC:chloroplast	K22520	LQY1			ENOG4111Q7U	S:Function unknown	TEY18629.1	hypothetical protein Saspl_050424 [Salvia splendens]	sp|K4BVL1|SPA_SOLLC	Protein SPA, chloroplastic OS=Solanum lycopersicum OX=4081 GN=SPA PE=2 SV=1	DUF5351;DnaJ_CXXCXGXG	Family of unknown function (DUF5351;DnaJ central domain
		g9290		g52268	GO:0005506;GO:0016021;GO:0006486;GO:0016757	molecular_function;cellular_component;biological_process;molecular_function	MF:iron ion binding;CC:integral component of membrane;BP:protein glycosylation;MF:transferase activity, transferring glycosyl groups					ENOG4111VMQ	S:Function unknown	XP_031106016.1	uncharacterized protein LOC116010663 [Ipomoea triloba]
		g58036		g24090	GO:0009631;GO:0009737;GO:0005829;GO:0016020;GO:0009414;GO:0009415	biological_process;biological_process;cellular_component;cellular_component;biological_process;biological_process	BP:cold acclimation;BP:response to abscisic acid;CC:cytosol;CC:membrane;BP:response to water deprivation;BP:response to water							XP_031102951.1	phosphoprotein ECPP44-like [Ipomoea triloba]			Dehydrin	Dehydrin
		g4477		g31185	GO:0009535;GO:0016168;GO:0009522;GO:0009523;GO:0016021;GO:0018298;GO:0009768;GO:0009416;GO:0009765	cellular_component;molecular_function;cellular_component;cellular_component;cellular_component;biological_process;biological_process;biological_process;biological_process	CC:chloroplast thylakoid membrane;MF:chlorophyll binding;CC:photosystem I;CC:photosystem II;CC:integral component of membrane;BP:protein-chromophore linkage;BP:photosynthesis, light harvesting in photosystem I;BP:response to light stimulus;BP:photosynthesis, light harvesting	K08908	LHCA2	map00196	Photosynthesis - antenna proteins	ENOG410YE22	S:Function unknown	XP_031091674.1	photosystem I chlorophyll a/b-binding protein 6, chloroplastic [Ipomoea triloba]	sp|Q8LCQ4|LHCA6_ARATH	Photosystem I chlorophyll a/b-binding protein 6, chloroplastic OS=Arabidopsis thaliana OX=3702 GN=LHCA6 PE=1 SV=1	Chloroa_b-bind	Chlorophyll A-B binding protein
		g19902		g42791	GO:0019898;GO:0005509;GO:0045156;GO:0009507;GO:0009654;GO:0015979;GO:0009767	cellular_component;molecular_function;molecular_function;cellular_component;cellular_component;biological_process;biological_process	CC:extrinsic component of membrane;MF:calcium ion binding;MF:electron transporter, transferring electrons within the cyclic electron transport pathway of photosynthesis activity;CC:chloroplast;CC:photosystem II oxygen evolving complex;BP:photosynthesis;BP:photosynthetic electron transport chain	K08901	psbQ	map00195	Photosynthesis	ENOG410YK3K	S:Function unknown	XP_031093315.1	photosynthetic NDH subunit of lumenal location 2, chloroplastic [Ipomoea triloba]	sp|Q9XI73|PNSL2_ARATH	Photosynthetic NDH subunit of lumenal location 2, chloroplastic OS=Arabidopsis thaliana OX=3702 GN=PNSL2 PE=1 SV=1	PsbQ	Oxygen evolving enhancer protein 3 (PsbQ
		g25309		g33235	GO:0097428;GO:0051539;GO:0009570;GO:0051536;GO:0016226;GO:0005506	biological_process;molecular_function;cellular_component;molecular_function;biological_process;molecular_function	BP:protein maturation by iron-sulfur cluster transfer;MF:4 iron, 4 sulfur cluster binding;CC:chloroplast stroma;MF:iron-sulfur cluster binding;BP:iron-sulfur cluster assembly;MF:iron ion binding					COG0694	S:Function unknown	XP_031090820.1	nifU-like protein 3, chloroplastic isoform X1 [Ipomoea triloba]	sp|Q84RQ7|NIFU3_ARATH	NifU-like protein 3, chloroplastic OS=Arabidopsis thaliana OX=3702 GN=NIFU3 PE=2 SV=1	NifU	NifU-like domain
		g54957		g13864	GO:0006355;GO:0005634;GO:0009734	biological_process;cellular_component;biological_process	BP:regulation of transcription, DNA-templated;CC:nucleus;BP:auxin-activated signaling pathway	K14484	IAA	map04075	Plant hormone signal transduction	ENOG410YIDV	K:Transcription	XP_031098776.1	auxin-responsive protein IAA4-like [Ipomoea triloba]	sp|P33077|IAA4_ARATH	Auxin-responsive protein IAA4 OS=Arabidopsis thaliana OX=3702 GN=IAA4 PE=1 SV=2	AUX_IAA	AUX/IAA family
[truncated: 4,217 more rows]

## Sheet: Table S4F
Table S4F Pseudotime of each cell
Barcode	Pseudotime
JHY_AAACCCACACTTTATC-1	31.9928
JHY_AAACCCAGTAGGTCAG-1	54.6384
JHY_AAACCCAGTCCACACG-1	26.8248
JHY_AAACCCAGTGTCATCA-1	54.0133
JHY_AAACCCAGTGTCTTGA-1	54.2757
JHY_AAACCCAGTTCTATCT-1	2.77834
JHY_AAACCCATCCACAGGC-1	6.38901
JHY_AAACCCATCCAGTACA-1	1.44439
JHY_AAACGAAAGATTCGAA-1	54.576
[truncated: 33,429 more rows]
