# Supplementary material for: Cell-type-specific response in host plants to the co-infection by sweet potato viruses
Source: Research Square preprint supplement (doi:10.21203/rs.3.rs-5025036/v1), 2024-09-20
Supplement: Supplementary file 10 [file Table_S5.xlsx]

## Sheet: Table S5A
Table S5A DEGs in PMC (Infected vs uninfected cells)
Upregulated DEGs
Gene ID	p_val	avg_log2FC	pct.1	pct.2	p_val_adj	GO_id	GO_term	Go_description	Go_description	KO_name	Pathway_id	Pathway_definition	COG_id	COG_Functional_Categories	NR_hit-name	NR_description	Swiss-Prot_hit-name	Swiss-Prot_description	Pfam_id	Domain	Domain_description
g1705	1.58644e-101	1.94079	0.379	0.114	3.03581e-97	GO:0009658;GO:0005634;GO:0008270;GO:0045893;GO:0003677	biological_process;cellular_component;molecular_function;biological_process;molecular_function	BP:chloroplast organization;CC:nucleus;MF:zinc ion binding;BP:positive regulation of transcription, DNA-templated;MF:DNA binding	BP:chloroplast organization;CC:nucleus;MF:zinc ion binding;BP:positive regulation of transcription, DNA-templated;MF:DNA binding				ENOG4111PGH	S:Function unknown	XP_031114774.1	uncharacterized protein LOC116018888 [Ipomoea triloba]			PF05349.13	GATA-N	GATA-type transcription activator, N-terminal
g19902	2.26316e-110	1.77231	0.407	0.119	4.33077e-106	GO:0043565;GO:0008270;GO:0006355	molecular_function;molecular_function;biological_process	MF:sequence-specific DNA binding;MF:zinc ion binding;BP:regulation of transcription, DNA-templated	MF:sequence-specific DNA binding;MF:zinc ion binding;BP:regulation of transcription, DNA-templated				COG5641	O:Posttranslational modification, protein turnover, chaperones	XP_031093887.1	putative GATA transcription factor 22 [Ipomoea triloba]			PF00320.28	GATA	GATA zinc finger
g41108	2.10184e-132	1.64133	0.493	0.158	4.02208e-128	GO:0003700;GO:0005634;GO:0008270;GO:0080167;GO:0003677;GO:0003682;GO:0031540	molecular_function;cellular_component;molecular_function;biological_process;molecular_function;molecular_function;biological_process	MF:transcription factor activity, sequence-specific DNA binding;CC:nucleus;MF:zinc ion binding;BP:response to karrikin;MF:DNA binding;MF:chromatin binding;BP:regulation of anthocyanin biosynthetic process	MF:transcription factor activity, sequence-specific DNA binding;CC:nucleus;MF:zinc ion binding;BP:response to karrikin;MF:DNA binding;MF:chromatin binding;BP:regulation of anthocyanin biosynthetic process				ENOG4111BIB	K:Transcription	XP_031124022.1	transcription factor MYB1R1 [Ipomoea triloba]	sp|Q2V9B0|MY1R1_SOLTU	Transcription factor MYB1R1 OS=Solanum tuberosum OX=4113 PE=2 SV=1	PF00249.32	Myb_DNA-binding	Myb-like DNA-binding domain
g25903	4.1979e-97	1.60311	0.401	0.128	8.0331e-93	GO:0043565;GO:0008270;GO:0006355	molecular_function;molecular_function;biological_process	MF:sequence-specific DNA binding;MF:zinc ion binding;BP:regulation of transcription, DNA-templated	MF:sequence-specific DNA binding;MF:zinc ion binding;BP:regulation of transcription, DNA-templated				COG5641	K:Transcription	XP_031107065.1	GATA transcription factor 21-like [Ipomoea triloba]	sp|Q9SZI6|GAT22_ARATH	Putative GATA transcription factor 22 OS=Arabidopsis thaliana OX=3702 GN=GATA22 PE=1 SV=1	PF00320.28	GATA	GATA zinc finger
g54469	1.08422e-54	1.52976	0.284	0.105	2.07475e-50	GO:0003700;GO:0044212;GO:0005634;GO:0045893;GO:0003677	molecular_function;molecular_function;cellular_component;biological_process;molecular_function	MF:transcription factor activity, sequence-specific DNA binding;MF:transcription regulatory region DNA binding;CC:nucleus;BP:positive regulation of transcription, DNA-templated;MF:DNA binding	MF:transcription factor activity, sequence-specific DNA binding;MF:transcription regulatory region DNA binding;CC:nucleus;BP:positive regulation of transcription, DNA-templated;MF:DNA binding				ENOG4111SK7	K:Transcription	XP_019194395.1	PREDICTED: transcription activator GLK1-like [Ipomoea nil]	sp|Q9FFH0|GLK2_ARATH	Transcription activator GLK2 OS=Arabidopsis thaliana OX=3702 GN=GLK2 PE=1 SV=1	PF00249.32	Myb_DNA-binding	Myb-like DNA-binding domain
g19971	2.45235e-155	1.51698	0.566	0.185	4.69282e-151	GO:0043565;GO:0008270;GO:0006355	molecular_function;molecular_function;biological_process	MF:sequence-specific DNA binding;MF:zinc ion binding;BP:regulation of transcription, DNA-templated	MF:sequence-specific DNA binding;MF:zinc ion binding;BP:regulation of transcription, DNA-templated				COG5641	K:Transcription	XP_031093887.1	putative GATA transcription factor 22 [Ipomoea triloba]			PF00320.28	GATA	GATA zinc finger
g38365	4.49134e-83	1.44603	0.35	0.111	8.59463e-79	GO:0046983	molecular_function	MF:protein dimerization activity					ENOG410YG89	K:Transcription	XP_031124423.1	transcription factor bHLH94-like [Ipomoea triloba]	sp|Q9SK91|BH094_ARATH	Transcription factor bHLH94 OS=Arabidopsis thaliana OX=3702 GN=BHLH94 PE=1 SV=2	PF00010.27	HLH	Helix-loop-helix DNA-binding domain
g14702	2.0243e-164	1.4374	0.646	0.241	3.8737e-160	GO:0046983	molecular_function	MF:protein dimerization activity					ENOG410YG89	K:Transcription	XP_031097495.1	transcription factor bHLH71-like [Ipomoea triloba]	sp|Q9SK91|BH094_ARATH	Transcription factor bHLH94 OS=Arabidopsis thaliana OX=3702 GN=BHLH94 PE=1 SV=2	PF00010.27	HLH	Helix-loop-helix DNA-binding domain
g34447	8.49429e-161	1.38105	0.648	0.244	1.62547e-156	GO:0046983	molecular_function	MF:protein dimerization activity					ENOG4111M4Q	K:Transcription	XP_031130166.1	transcription factor bHLH115-like isoform X1 [Ipomoea triloba]	sp|Q9FH37|ILR3_ARATH	Transcription factor ILR3 OS=Arabidopsis thaliana OX=3702 GN=ILR3 PE=1 SV=1	PF00010.27;PF13476.7	HLH;AAA_23	Helix-loop-helix DNA-binding domain;AAA domain
g867	1.54498e-218	1.34514	0.845	0.395	2.95648e-214	GO:0005854	cellular_component	CC:nascent polypeptide-associated complex	K03626	EGD2, NACA			COG1308	S:Function unknown	XP_031114895.1	nascent polypeptide-associated complex subunit alpha-like protein 2 [Ipomoea triloba]	sp|Q94JX9|NACA2_ARATH	Nascent polypeptide-associated complex subunit alpha-like protein 2 OS=Arabidopsis thaliana OX=3702 GN=At3g49470 PE=2 SV=2	PF01849.19;PF19026.1	NAC;HYPK_UBA	NAC domain;HYPK UBA domain
g20702	4.26937e-91	1.33848	0.444	0.172	8.16986e-87	GO:0005854	cellular_component	CC:nascent polypeptide-associated complex	K03626	EGD2, NACA			COG1308	K:Transcription	XP_031095528.1	nascent polypeptide-associated complex subunit alpha-like protein 2 [Ipomoea triloba]	sp|Q94JX9|NACA2_ARATH	Nascent polypeptide-associated complex subunit alpha-like protein 2 OS=Arabidopsis thaliana OX=3702 GN=At3g49470 PE=2 SV=2	PF01849.19;PF19026.1	NAC;HYPK_UBA	NAC domain;HYPK UBA domain
g52942	2.94364e-97	1.28358	0.494	0.203	5.63295e-93	GO:0044212;GO:0005634;GO:0009751;GO:0009739;GO:0003677	molecular_function;cellular_component;biological_process;biological_process;molecular_function	MF:transcription regulatory region DNA binding;CC:nucleus;BP:response to salicylic acid;BP:response to gibberellin;MF:DNA binding	MF:transcription regulatory region DNA binding;CC:nucleus;BP:response to salicylic acid;BP:response to gibberellin;MF:DNA binding				ENOG410YG84;COG5269	K:Transcription;K:Transcription	XP_031105045.1	transcription factor MYBS1 [Ipomoea triloba]	sp|Q9FNN6|SRM1_ARATH	Transcription factor SRM1 OS=Arabidopsis thaliana OX=3702 GN=SRM1 PE=1 SV=1	PF00249.32	Myb_DNA-binding	Myb-like DNA-binding domain
g38960	1.5323e-54	1.1161	0.373	0.169	2.93221e-50	GO:0046983	molecular_function	MF:protein dimerization activity					ENOG410YB4F	K:Transcription	XP_031124115.1	transcription factor bHLH93-like [Ipomoea triloba]	sp|Q9LSL1|BH093_ARATH	Transcription factor bHLH93 OS=Arabidopsis thaliana OX=3702 GN=BHLH93 PE=1 SV=1	PF00010.27	HLH	Helix-loop-helix DNA-binding domain
g10197	4.54098e-55	1.08382	0.361	0.16	8.68961e-51	GO:0043565;GO:0008270;GO:0006355	molecular_function;molecular_function;biological_process	MF:sequence-specific DNA binding;MF:zinc ion binding;BP:regulation of transcription, DNA-templated	MF:sequence-specific DNA binding;MF:zinc ion binding;BP:regulation of transcription, DNA-templated				COG5641	O:Posttranslational modification, protein turnover, chaperones	XP_031101081.1	GATA transcription factor 7-like [Ipomoea triloba]	sp|Q6DBP8|GAT11_ARATH	GATA transcription factor 11 OS=Arabidopsis thaliana OX=3702 GN=GATA11 PE=2 SV=1	PF00320.28	GATA	GATA zinc finger
g41863	6.94992e-41	1.04552	0.281	0.122	1.32994e-36	GO:0005634;GO:0003677	cellular_component;molecular_function	CC:nucleus;MF:DNA binding					COG5147	S:Function unknown	XP_031095935.1	transcription factor MYB77-like [Ipomoea triloba]	sp|O23160|MYB73_ARATH	Transcription factor MYB73 OS=Arabidopsis thaliana OX=3702 GN=MYB73 PE=1 SV=1	PF00249.32;PF13921.7;PF15963.6	Myb_DNA-binding;Myb_DNA-bind_6;Myb_DNA-bind_7	Myb-like DNA-binding domain;Myb-like DNA-binding domain;Myb DNA-binding like
g13408	2.05823e-130	1.00598	0.73	0.346	3.93862e-126	GO:0005634;GO:0003677	cellular_component;molecular_function	CC:nucleus;MF:DNA binding					ENOG410YGB1	K:Transcription	XP_031098634.1	protein PHR1-LIKE 2 [Ipomoea triloba]	sp|Q94A57|PHL2_ARATH	Protein PHR1-LIKE 2 OS=Arabidopsis thaliana OX=3702 GN=PHL2 PE=1 SV=1	PF14379.7;PF00249.32	Myb_CC_LHEQLE;Myb_DNA-binding	MYB-CC type transfactor, LHEQLE motif;Myb-like DNA-binding domain
g56359	8.40976e-68	0.972325	0.484	0.241	1.60929e-63								ENOG410YYXY	K:Transcription	XP_031128867.1	trihelix transcription factor GTL2-like [Ipomoea triloba]	sp|Q8H181|GTL2_ARATH	Trihelix transcription factor GTL2 OS=Arabidopsis thaliana OX=3702 GN=At5g28300 PE=2 SV=1	PF13837.7;PF13921.7;PF10545.10;PF00249.32	Myb_DNA-bind_4;Myb_DNA-bind_6;MADF_DNA_bdg;Myb_DNA-binding	Myb/SANT-like DNA-binding domain;Myb-like DNA-binding domain;Alcohol dehydrogenase transcription factor Myb/SANT-like;Myb-like DNA-binding domain
g12851	1.08863e-53	0.837986	0.439	0.222	2.08319e-49	GO:0003700;GO:0005634;GO:0003677	molecular_function;cellular_component;molecular_function	MF:transcription factor activity, sequence-specific DNA binding;CC:nucleus;MF:DNA binding	MF:transcription factor activity, sequence-specific DNA binding;CC:nucleus;MF:DNA binding				ENOG410Z04J	K:Transcription	XP_031098626.1	ethylene-responsive transcription factor ERF118-like [Ipomoea triloba]	sp|Q9CA27|EF118_ARATH	Ethylene-responsive transcription factor ERF118 OS=Arabidopsis thaliana OX=3702 GN=ERF118 PE=2 SV=1	PF00847.21	AP2	AP2 domain
g14520	8.3342e-72	0.789844	0.611	0.353	1.59483e-67				K01527	EGD1, BTF3			ENOG4111JBG	K:Transcription	XP_031097342.1	basic transcription factor 3-like [Ipomoea triloba]	sp|Q9SMW7|BTF3_ARATH	Basic transcription factor 3 OS=Arabidopsis thaliana OX=3702 GN=BTF3 PE=1 SV=1	PF01849.19	NAC	NAC domain
g54002	4.78677e-154	0.711008	0.975	0.741	9.15997e-150	GO:0016021;GO:0042788;GO:0005829;GO:0005854	cellular_component;cellular_component;cellular_component;cellular_component	CC:integral component of membrane;CC:polysomal ribosome;CC:cytosol;CC:nascent polypeptide-associated complex	K01527	EGD1, BTF3			ENOG4111JBG	S:Function unknown	XP_031106012.1	basic transcription factor 3-like [Ipomoea triloba]	sp|Q9SMW7|BTF3_ARATH	Basic transcription factor 3 OS=Arabidopsis thaliana OX=3702 GN=BTF3 PE=1 SV=1	PF01849.19	NAC	NAC domain
g14517	5.36744e-49	0.658841	0.558	0.34	1.02711e-44	GO:0005829;GO:0042788;GO:0005854	cellular_component;cellular_component;cellular_component	CC:cytosol;CC:polysomal ribosome;CC:nascent polypeptide-associated complex	K01527	EGD1, BTF3			ENOG4111JBG	K:Transcription	XP_031097472.1	basic transcription factor 3-like [Ipomoea triloba]	sp|Q9SMW7|BTF3_ARATH	Basic transcription factor 3 OS=Arabidopsis thaliana OX=3702 GN=BTF3 PE=1 SV=1	PF01849.19	NAC	NAC domain
g47190	2.89891e-34	0.643194	0.429	0.249	5.54736e-30	GO:0006355;GO:0046983	biological_process;molecular_function	BP:regulation of transcription, DNA-templated;MF:protein dimerization activity	BP:regulation of transcription, DNA-templated;MF:protein dimerization activity				ENOG410YAFX	K:Transcription	XP_031120737.1	transcription factor BHLH089-like isoform X2 [Ipomoea triloba]	sp|Q69WS3|BH094_ORYSJ	Transcription factor BHLH094 OS=Oryza sativa subsp. japonica OX=39947 GN=BHLH094 PE=1 SV=2	PF00010.27	HLH	Helix-loop-helix DNA-binding domain
g13650	5.19888e-40	0.560953	0.525	0.306	9.94858e-36	GO:0046983	molecular_function	MF:protein dimerization activity					ENOG4111GT2	K:Transcription	XP_031098816.1	transcription factor ICE1-like [Ipomoea triloba]	sp|Q9LSE2|ICE1_ARATH	Transcription factor ICE1 OS=Arabidopsis thaliana OX=3702 GN=SCRM PE=1 SV=1	PF00010.27	HLH	Helix-loop-helix DNA-binding domain
g25396	1.50904e-56	0.523049	0.695	0.427	2.8877e-52	GO:0003700;GO:0005634;GO:0003677	molecular_function;cellular_component;molecular_function	MF:transcription factor activity, sequence-specific DNA binding;CC:nucleus;MF:DNA binding	MF:transcription factor activity, sequence-specific DNA binding;CC:nucleus;MF:DNA binding	EREBP			ENOG410YIK7;ENOG410ZM5J	K:Transcription;S:Function unknown	XP_031107206.1	ethylene-responsive transcription factor 5-like [Ipomoea triloba]	sp|Q40478|ERF5_TOBAC	Ethylene-responsive transcription factor 5 OS=Nicotiana tabacum OX=4097 GN=ERF5 PE=2 SV=1	PF00847.21	AP2	AP2 domain
g17206	3.41832e-27	0.493723	0.349	0.203	6.5413e-23	GO:0003700;GO:0005634;GO:0003677	molecular_function;cellular_component;molecular_function	MF:transcription factor activity, sequence-specific DNA binding;CC:nucleus;MF:DNA binding	MF:transcription factor activity, sequence-specific DNA binding;CC:nucleus;MF:DNA binding	AP2			ENOG410YBZ8	K:Transcription	XP_031094830.1	AP2-like ethylene-responsive transcription factor TOE3 [Ipomoea triloba]	sp|P47927|AP2_ARATH	Floral homeotic protein APETALA 2 OS=Arabidopsis thaliana OX=3702 GN=AP2 PE=1 SV=1	PF00847.21	AP2	AP2 domain
g56238	6.95049e-33	0.4891	0.495	0.319	1.33005e-28	GO:0009649;GO:0003700;GO:0005634;GO:0005623;GO:0019900;GO:0042802;GO:0009267;GO:0071333;GO:0071215;GO:0046982;GO:0043621	biological_process;molecular_function;cellular_component;cellular_component;molecular_function;molecular_function;biological_process;biological_process;biological_process;molecular_function;molecular_function	BP:entrainment of circadian clock;MF:transcription factor activity, sequence-specific DNA binding;CC:nucleus;CC:cell;MF:kinase binding;MF:identical protein binding;BP:cellular response to starvation;BP:cellular response to glucose stimulus;BP:cellular response to abscisic acid stimulus;MF:protein heterodimerization activity;MF:protein self-association	BP:entrainment of circadian clock;MF:transcription factor activity, sequence-specific DNA binding;CC:nucleus;CC:cell;MF:kinase binding;MF:identical protein binding;BP:cellular response to starvation;BP:cellular response to glucose stimulus;BP:cellular response to abscisic acid stimulus;MF:protein heterodimerization activity;MF:protein self-association				ENOG4111S51	K:Transcription	XP_031125793.1	light-inducible protein CPRF2-like [Ipomoea triloba]	sp|Q99090|CPRF2_PETCR	Light-inducible protein CPRF2 OS=Petroselinum crispum OX=4043 GN=CPRF2 PE=2 SV=2	PF12498.9;PF00170.22;PF07716.16;PF03131.18	bZIP_C;bZIP_1;bZIP_2;bZIP_Maf	Basic leucine-zipper C terminal;bZIP transcription factor;Basic region leucine zipper;bZIP Maf transcription factor
g30780	5.82291e-26	0.402029	0.44	0.279	1.11427e-21	GO:0003700	molecular_function	MF:transcription factor activity, sequence-specific DNA binding	MF:transcription factor activity, sequence-specific DNA binding				ENOG410YEYG;ENOG410YEYG	B:Chromatin structure and dynamics;K:Transcription	XP_031092790.1	transcription factor PCF5-like [Ipomoea triloba]	sp|Q9MAH8|TCP3_ARATH	Transcription factor TCP3 OS=Arabidopsis thaliana OX=3702 GN=TCP3 PE=1 SV=1	PF03634.14	TCP	TCP family transcription factor
g25395	1.6393e-14	0.348251	0.32	0.214	3.13696e-10	GO:0003700;GO:0006952;GO:0005634;GO:0003677;GO:0009873	molecular_function;biological_process;cellular_component;molecular_function;biological_process	MF:transcription factor activity, sequence-specific DNA binding;BP:defense response;CC:nucleus;MF:DNA binding;BP:ethylene-activated signaling pathway	MF:transcription factor activity, sequence-specific DNA binding;BP:defense response;CC:nucleus;MF:DNA binding;BP:ethylene-activated signaling pathway	EREBP			ENOG410YJV7	S:Function unknown	XP_031107093.1	ethylene-responsive transcription factor 2-like [Ipomoea triloba]	sp|Q9LW50|ERF2_NICSY	Ethylene-responsive transcription factor 2 OS=Nicotiana sylvestris OX=4096 GN=ERF2 PE=2 SV=1
g58671	4.58826e-19	0.326296	0.392	0.261	8.7801e-15	GO:0003676	molecular_function	MF:nucleic acid binding	K09191	GTF3A			COG5048	S:Function unknown	XP_031128208.1	transcription factor IIIA [Ipomoea triloba]	sp|Q84MZ4|TF3A_ARATH	Transcription factor IIIA OS=Arabidopsis thaliana OX=3702 GN=TFIIIA PE=1 SV=1	PF00096.27;PF13894.7	zf-C2H2;zf-C2H2_4	Zinc finger, C2H2 type;C2H2-type zinc finger
g34109	8.81118e-14	0.325989	0.336	0.225	1.68611e-09	GO:0005634;GO:0003677	cellular_component;molecular_function	CC:nucleus;MF:DNA binding					ENOG410YFA9	K:Transcription	XP_031129766.1	transcription factor HHO5-like [Ipomoea triloba]	sp|F4JRB0|HHO5_ARATH	Transcription factor HHO5 OS=Arabidopsis thaliana OX=3702 GN=HHO5 PE=1 SV=1	PF00249.32	Myb_DNA-binding	Myb-like DNA-binding domain
g35944	1.56707e-13	0.306736	0.34	0.237	2.99874e-09	GO:0003677	molecular_function	MF:DNA binding	K21625	DMTF1, DMP1			COG0484;COG5147	O:Posttranslational modification, protein turnover, chaperones;K:Transcription	XP_031131084.1	cyclin-D-binding Myb-like transcription factor 1 [Ipomoea triloba]			PF00249.32	Myb_DNA-binding	Myb-like DNA-binding domain
g49489	3.17344e-16	0.268777	0.431	0.305	6.0727e-12	GO:0003677	molecular_function	MF:DNA binding	K21625	DMTF1, DMP1			COG5147;COG0484	K:Transcription;O:Posttranslational modification, protein turnover, chaperones	XP_031131084.1	cyclin-D-binding Myb-like transcription factor 1 [Ipomoea triloba]	sp|Q54TN2|MYBC_DICDI	Myb-like protein C OS=Dictyostelium discoideum OX=44689 GN=mybC PE=1 SV=1	PF13921.7;PF00249.32	Myb_DNA-bind_6;Myb_DNA-binding	Myb-like DNA-binding domain;Myb-like DNA-binding domain
g35355	2.31566e-41	0.264144	0.93	0.712	4.43124e-37	GO:0046983	molecular_function	MF:protein dimerization activity					ENOG4111GT2	K:Transcription	XP_031131287.1	transcription factor ICE1 [Ipomoea triloba]	sp|Q9LSE2|ICE1_ARATH	Transcription factor ICE1 OS=Arabidopsis thaliana OX=3702 GN=SCRM PE=1 SV=1	PF00010.27	HLH	Helix-loop-helix DNA-binding domain
g18461	1.47874e-98	2.14424	0.322	0.079	2.82971e-94	GO:0003824;GO:0005975;GO:0030246	molecular_function;biological_process;molecular_function	MF:catalytic activity;BP:carbohydrate metabolic process;MF:carbohydrate binding					ENOG411201G	S:Function unknown	XP_031095737.1	protein NDH-DEPENDENT CYCLIC ELECTRON FLOW 5 isoform X2 [Ipomoea triloba]	sp|Q9C503|NDF5_ARATH	Protein NDH-DEPENDENT CYCLIC ELECTRON FLOW 5 OS=Arabidopsis thaliana OX=3702 GN=NDF5 PE=2 SV=1
g53926	3.19411e-137	2.08025	0.431	0.11	6.11226e-133	GO:0005829;GO:0030388;GO:0006096;GO:0009116;GO:0004332;GO:0016021	cellular_component;biological_process;biological_process;biological_process;molecular_function;cellular_component	CC:cytosol;BP:fructose 1,6-bisphosphate metabolic process;BP:glycolytic process;BP:nucleoside metabolic process;MF:fructose-bisphosphate aldolase activity;CC:integral component of membrane	K01623	ALDO	map00010;map00030;map00051;map00710	Glycolysis / Gluconeogenesis;Pentose phosphate pathway;Fructose and mannose metabolism;Carbon fixation in photosynthetic organisms	COG3588	S:Function unknown	XP_031106743.1	fructose-bisphosphate aldolase, cytoplasmic isozyme 1 [Ipomoea triloba]	sp|P46256|ALF1_PEA	Fructose-bisphosphate aldolase, cytoplasmic isozyme 1 OS=Pisum sativum OX=3888 PE=2 SV=1	PF00274.20	Glycolytic	Fructose-bisphosphate aldolase class-I
g29756	2.67612e-123	1.98746	0.388	0.095	5.12103e-119								ENOG410Y3FX	T:Signal transduction mechanisms	XP_031109860.1	uncharacterized protein LOC116014019 [Ipomoea triloba]			PF11347.9	DUF3148	Protein of unknown function (DUF3148
g42791	1.96764e-149	1.90424	0.506	0.152	3.76528e-145	GO:0019898;GO:0005509;GO:0045156;GO:0009507;GO:0009654;GO:0015979;GO:0009767	cellular_component;molecular_function;molecular_function;cellular_component;cellular_component;biological_process;biological_process	CC:extrinsic component of membrane;MF:calcium ion binding;MF:electron transporter, transferring electrons within the cyclic electron transport pathway of photosynthesis activity;CC:chloroplast;CC:photosystem II oxygen evolving complex;BP:photosynthesis;BP:photosynthetic electron transport chain	K08901	psbQ	map00195	Photosynthesis	ENOG410YK3K	S:Function unknown	XP_031093315.1	photosynthetic NDH subunit of lumenal location 2, chloroplastic [Ipomoea triloba]	sp|Q9XI73|PNSL2_ARATH	Photosynthetic NDH subunit of lumenal location 2, chloroplastic OS=Arabidopsis thaliana OX=3702 GN=PNSL2 PE=1 SV=1	PF05757.12	PsbQ	Oxygen evolving enhancer protein 3 (PsbQ
g25466	1.70561e-123	1.90299	0.415	0.113	3.26385e-119	GO:0046983	molecular_function	MF:protein dimerization activity					ENOG410YJUZ	S:Function unknown	XP_019192195.1	PREDICTED: transcription factor SCREAM2-like [Ipomoea nil]
g52268	4.04995e-109	1.89633	0.396	0.117	7.74999e-105	GO:0005506;GO:0016021;GO:0006486;GO:0016757	molecular_function;cellular_component;biological_process;molecular_function	MF:iron ion binding;CC:integral component of membrane;BP:protein glycosylation;MF:transferase activity, transferring glycosyl groups					ENOG4111VMQ	S:Function unknown	XP_031106016.1	uncharacterized protein LOC116010663 [Ipomoea triloba]
g61617	3.71509e-116	1.89377	0.391	0.104	7.10919e-112	GO:0016021	cellular_component	CC:integral component of membrane					ENOG4112AX7	S:Function unknown	XP_031118712.1	uncharacterized protein LOC116022227 [Ipomoea triloba]			PF05421.12	DUF751	Protein of unknown function (DUF751
g34533	3.9676e-138	1.89159	0.468	0.136	7.5924e-134	GO:0071944	cellular_component	CC:cell periphery					ENOG410ZDC2;ENOG410Z3GS	S:Function unknown;S:Function unknown	XP_031131360.1	non-classical arabinogalactan protein 31-like [Ipomoea triloba]	sp|Q03211|PEXLP_TOBAC	Pistil-specific extensin-like protein OS=Nicotiana tabacum OX=4097 PE=2 SV=1	PF01190.18	Pollen_Ole_e_1	Pollen protein Ole e 1 like
g34739	0	1.88301	0.999	0.883	0	GO:0009535;GO:0016168;GO:0009522;GO:0009523;GO:0016021;GO:0018298;GO:0009765	cellular_component;molecular_function;cellular_component;cellular_component;cellular_component;biological_process;biological_process	CC:chloroplast thylakoid membrane;MF:chlorophyll binding;CC:photosystem I;CC:photosystem II;CC:integral component of membrane;BP:protein-chromophore linkage;BP:photosynthesis, light harvesting	K08912	LHCB1	map00196	Photosynthesis - antenna proteins			XP_031131334.1	chlorophyll a-b binding protein of LHCII type 1-like [Ipomoea triloba]	sp|P27495|CB24_TOBAC	Chlorophyll a-b binding protein 40, chloroplastic OS=Nicotiana tabacum OX=4097 GN=CAB40 PE=2 SV=1	PF00504.22	Chloroa_b-bind	Chlorophyll A-B binding protein
g24048	3.98502e-67	1.87337	0.258	0.073	7.62573e-63	GO:0009535;GO:0009941;GO:0016168;GO:0009522;GO:0009523;GO:0016021;GO:0010287;GO:0018298;GO:0009768;GO:0009416;GO:0009765	cellular_component;cellular_component;molecular_function;cellular_component;cellular_component;cellular_component;cellular_component;biological_process;biological_process;biological_process;biological_process	CC:chloroplast thylakoid membrane;CC:chloroplast envelope;MF:chlorophyll binding;CC:photosystem I;CC:photosystem II;CC:integral component of membrane;CC:plastoglobule;BP:protein-chromophore linkage;BP:photosynthesis, light harvesting in photosystem I;BP:response to light stimulus;BP:photosynthesis, light harvesting	K14172	LHCB7	map00196	Photosynthesis - antenna proteins	ENOG410YIPW	S:Function unknown	XP_031103280.1	chlorophyll a-b binding protein 7, chloroplastic [Ipomoea triloba]	sp|Q9C9K1|CB7_ARATH	Chlorophyll a-b binding protein 7, chloroplastic OS=Arabidopsis thaliana OX=3702 GN=LHCB7 PE=2 SV=1	PF00504.22	Chloroa_b-bind	Chlorophyll A-B binding protein
g17749	1.18774e-149	1.87286	0.502	0.148	2.27286e-145	GO:0016021;GO:0043953	cellular_component;biological_process	CC:integral component of membrane;BP:protein transport by the Tat complex	K03116	tatA	map03060	Protein export	COG1826	U:Intracellular trafficking, secretion, and vesicular transport	XP_019161341.1	PREDICTED: uncharacterized protein LOC109157984 [Ipomoea nil]	sp|Q9XH46|TATA_PEA	Sec-independent protein translocase protein TATA, chloroplastic OS=Pisum sativum OX=3888 GN=TATA PE=1 SV=1	PF02416.17	TatA_B_E	mttA/Hcf106 family
g29965	0	1.83417	0.999	0.762	0	GO:0009654;GO:0010207;GO:0010242;GO:0042549	cellular_component;biological_process;molecular_function;biological_process	CC:photosystem II oxygen evolving complex;BP:photosystem II assembly;MF:oxygen evolving activity;BP:photosystem II stabilization	K02716	psbO	map00195	Photosynthesis	ENOG410XP4G	G:Carbohydrate transport and metabolism	XP_031108209.1	oxygen-evolving enhancer protein 1, chloroplastic [Ipomoea triloba]	sp|Q40459|PSBO_TOBAC	Oxygen-evolving enhancer protein 1, chloroplastic OS=Nicotiana tabacum OX=4097 GN=PSBO PE=2 SV=1	PF01716.19	MSP	Manganese-stabilising protein / photosystem II polypeptide
g54964	0	1.82452	0.999	0.872	0	GO:0009535;GO:0016168;GO:0009522;GO:0009523;GO:0016021;GO:0018298;GO:0009768;GO:0009416;GO:0009765	cellular_component;molecular_function;cellular_component;cellular_component;cellular_component;biological_process;biological_process;biological_process;biological_process	CC:chloroplast thylakoid membrane;MF:chlorophyll binding;CC:photosystem I;CC:photosystem II;CC:integral component of membrane;BP:protein-chromophore linkage;BP:photosynthesis, light harvesting in photosystem I;BP:response to light stimulus;BP:photosynthesis, light harvesting	K08907	LHCA1	map00196	Photosynthesis - antenna proteins	ENOG410XVD6	O:Posttranslational modification, protein turnover, chaperones	XP_031106389.1	chlorophyll a-b binding protein 6, chloroplastic [Ipomoea triloba]	sp|P12360|CB11_SOLLC	Chlorophyll a-b binding protein 6A, chloroplastic OS=Solanum lycopersicum OX=4081 GN=CAB6A PE=2 SV=1	PF00504.22	Chloroa_b-bind	Chlorophyll A-B binding protein
g13711	1.54957e-127	1.82192	0.44	0.126	2.96526e-123	GO:0009507	cellular_component	CC:chloroplast					ENOG4112859	S:Function unknown	XP_031098745.1	uncharacterized protein LOC116002719 [Ipomoea triloba]
g7995	0	1.81721	0.98	0.447	0	GO:0005504;GO:0016021;GO:0009627	molecular_function;cellular_component;biological_process	MF:fatty acid binding;CC:integral component of membrane;BP:systemic acquired resistance					ENOG410YXDY	S:Function unknown	XP_031113450.1	putative lipid-transfer protein DIR1 [Ipomoea triloba]	sp|Q8W453|DIRL1_ARATH	Putative lipid-transfer protein DIR1 OS=Arabidopsis thaliana OX=3702 GN=DIR1 PE=1 SV=1	PF14368.7;PF00234.23	LTP_2;Tryp_alpha_amyl	Probable lipid transfer;Protease inhibitor/seed storage/LTP family
g8432	9.652e-238	1.81646	0.707	0.231	1.84701e-233	GO:0009535;GO:0016021;GO:0006979;GO:0009507	cellular_component;cellular_component;biological_process;cellular_component	CC:chloroplast thylakoid membrane;CC:integral component of membrane;BP:response to oxidative stress;CC:chloroplast					ENOG41127XZ	S:Function unknown	XP_031111154.1	photosynthetic NDH subunit of subcomplex B 5, chloroplastic [Ipomoea triloba]	sp|Q9FG89|PNSB5_ARATH	Photosynthetic NDH subunit of subcomplex B 5, chloroplastic OS=Arabidopsis thaliana OX=3702 GN=PNSB5 PE=2 SV=1
g32176	3.45036e-284	1.81271	0.809	0.307	6.60261e-280	GO:0016021	cellular_component	CC:integral component of membrane					ENOG4111RQR	S:Function unknown	XP_031090694.1	uncharacterized protein LOC115995724 [Ipomoea triloba]			PF06549.13	DUF1118	Protein of unknown function (DUF1118
g7889	5.15185e-89	1.81205	0.319	0.084	9.85859e-85				K13065	E2.3.1.133, HCT	map00941;map00940;map00945	Flavonoid biosynthesis;Phenylpropanoid biosynthesis;Stilbenoid, diarylheptanoid and gingerol biosynthesis			XP_031111825.1	stemmadenine O-acetyltransferase-like [Ipomoea triloba]	sp|A0A2P1GIW7|SAT_CATRO	Stemmadenine O-acetyltransferase OS=Catharanthus roseus OX=4058 GN=SAT PE=1 SV=1	PF02458.16	Transferase	Transferase family
g54082	1.06025e-292	1.80958	0.814	0.273	2.02889e-288	GO:0009535;GO:0019898;GO:0005509;GO:0009344;GO:0045156;GO:0009507;GO:0009654;GO:0015979;GO:0009767	cellular_component;cellular_component;molecular_function;cellular_component;molecular_function;cellular_component;cellular_component;biological_process;biological_process	CC:chloroplast thylakoid membrane;CC:extrinsic component of membrane;MF:calcium ion binding;CC:nitrite reductase complex [NAD(P)H];MF:electron transporter, transferring electrons within the cyclic electron transport pathway of photosynthesis activity;CC:chloroplast;CC:photosystem II oxygen evolving complex;BP:photosynthesis;BP:photosynthetic electron transport chain	K08901	psbQ	map00195	Photosynthesis	ENOG410YH09	S:Function unknown	XP_031105638.1	photosynthetic NDH subunit of lumenal location 3, chloroplastic [Ipomoea triloba]	sp|Q9SGH4|PNSL3_ARATH	Photosynthetic NDH subunit of lumenal location 3, chloroplastic OS=Arabidopsis thaliana OX=3702 GN=PNSL3 PE=1 SV=1	PF05757.12	PsbQ	Oxygen evolving enhancer protein 3 (PsbQ
g36358	1.09456e-184	1.80943	0.614	0.197	2.09454e-180	GO:0005794;GO:0006644;GO:0016021;GO:0050482;GO:0016042;GO:0005576;GO:0005509;GO:0008289;GO:0102567;GO:0102568;GO:0004623	cellular_component;biological_process;cellular_component;biological_process;biological_process;cellular_component;molecular_function;molecular_function;molecular_function;molecular_function;molecular_function	CC:Golgi apparatus;BP:phospholipid metabolic process;CC:integral component of membrane;BP:arachidonic acid secretion;BP:lipid catabolic process;CC:extracellular region;MF:calcium ion binding;MF:lipid binding;MF:phospholipase A2 activity (consuming 1,2-dipalmitoylphosphatidylcholine;MF:phospholipase A2 activity consuming 1,2-dioleoylphosphatidylethanolamine;MF:phospholipase A2 activity	K01047	PLA2G, SPLA2	map00565;map00564;map00592;map00591;map00590	Ether lipid metabolism;Glycerophospholipid metabolism;alpha-Linolenic acid metabolism;Linoleic acid metabolism;Arachidonic acid metabolism	ENOG410YKKM	I:Lipid transport and metabolism	XP_031130201.1	phospholipase A2-alpha-like [Ipomoea triloba]	sp|Q8S8N6|PLA2A_ARATH	Phospholipase A2-alpha OS=Arabidopsis thaliana OX=3702 GN=PLA2-ALPHA PE=1 SV=1
g24994	7.96861e-173	1.80638	0.57	0.173	1.52487e-168	GO:0045454;GO:0000224;GO:0005623	biological_process;molecular_function;cellular_component	BP:cell redox homeostasis;MF:peptide-N4-(N-acetyl-beta-glucosaminyl)asparagine amidase activity;CC:cell					COG0526	S:Function unknown	XP_031103973.1	thioredoxin-like 3-1, chloroplastic [Ipomoea triloba]	sp|Q9FG36|TRL31_ARATH	Thioredoxin-like 3-1, chloroplastic OS=Arabidopsis thaliana OX=3702 GN=WCRKC1 PE=2 SV=3	PF00085.21	Thioredoxin	Thioredoxin
g54075	4.90097e-80	1.80631	0.315	0.094	9.37849e-76	GO:0009570;GO:0010258	cellular_component;biological_process	CC:chloroplast stroma;BP:NADH dehydrogenase complex (plastoquinone) assembly					ENOG410YJ74	S:Function unknown	XP_031104721.1	uncharacterized protein LOC116009737 [Ipomoea triloba]
g43386	1.4807e-226	1.80041	0.681	0.22	2.83346e-222	GO:0009570	cellular_component	CC:chloroplast stroma					ENOG41129PA	S:Function unknown	XP_031091091.1	uncharacterized protein LOC115996088 [Ipomoea triloba]
g26218	5.46758e-112	1.7995	0.402	0.117	1.04628e-107								ENOG410YKTH;ENOG41117UE	S:Function unknown;U:Intracellular trafficking, secretion, and vesicular transport	XP_019183904.1	PREDICTED: 36.4 kDa proline-rich protein-like isoform X2 [Ipomoea nil]	sp|Q00451|PRF1_SOLLC	36.4 kDa proline-rich protein OS=Solanum lycopersicum OX=4081 GN=TPRP-F1 PE=2 SV=1	PF14547.7;PF14368.7	Hydrophob_seed;LTP_2	Hydrophobic seed protein;Probable lipid transfer
g7950	0	1.79809	0.956	0.372	0	GO:0005504;GO:0016021;GO:0009627	molecular_function;cellular_component;biological_process	MF:fatty acid binding;CC:integral component of membrane;BP:systemic acquired resistance					ENOG410YXDY	S:Function unknown	XP_031113450.1	putative lipid-transfer protein DIR1 [Ipomoea triloba]	sp|Q8W453|DIRL1_ARATH	Putative lipid-transfer protein DIR1 OS=Arabidopsis thaliana OX=3702 GN=DIR1 PE=1 SV=1	PF14368.7;PF00234.23	LTP_2;Tryp_alpha_amyl	Probable lipid transfer;Protease inhibitor/seed storage/LTP family
g1822	1.68065e-180	1.7973	0.606	0.199	3.2161e-176	GO:0016655	molecular_function	MF:oxidoreductase activity, acting on NAD(P)H, quinone or similar compound as acceptor					ENOG4111NC5	C:Energy production and conversion	XP_031115012.1	NAD(P)H-quinone oxidoreductase subunit M, chloroplastic [Ipomoea triloba]	sp|A9PJQ8|NDHM_POPJC	NAD(P)H-quinone oxidoreductase subunit M, chloroplastic OS=Populus jackii OX=640484 GN=ndhM PE=2 SV=1	PF10664.10	NdhM	Cyanobacterial and plastid NDH-1 subunit M
g297	6.34125e-296	1.79615	0.924	0.508	1.21346e-291	GO:0015995;GO:0015979;GO:0016630;GO:0009507	biological_process;biological_process;molecular_function;cellular_component	BP:chlorophyll biosynthetic process;BP:photosynthesis;MF:protochlorophyllide reductase activity;CC:chloroplast	K00218	por	map00860	Porphyrin and chlorophyll metabolism	COG1028	S:Function unknown	XP_031117330.1	protochlorophyllide reductase-like [Ipomoea triloba]	sp|Q41249|PORA_CUCSA	Protochlorophyllide reductase, chloroplastic OS=Cucumis sativus OX=3659 GN=PORA PE=2 SV=1	PF00106.26;PF13561.7;PF08659.11	adh_short;adh_short_C2;KR	short chain dehydrogenase;Enoyl-(Acyl carrier protein) reductase;KR domain
g8948	1.15815e-229	1.78953	0.704	0.245	2.21623e-225	GO:0019898;GO:0009654;GO:0005509;GO:0015979	cellular_component;cellular_component;molecular_function;biological_process	CC:extrinsic component of membrane;CC:photosystem II oxygen evolving complex;MF:calcium ion binding;BP:photosynthesis					ENOG4111I6X	S:Function unknown	XP_031111532.1	thylakoid lumenal 19 kDa protein, chloroplastic [Ipomoea triloba]	sp|P82658|TL19_ARATH	Thylakoid lumenal 19 kDa protein, chloroplastic OS=Arabidopsis thaliana OX=3702 GN=At3g63540 PE=1 SV=2	PF01789.17	PsbP	PsbP
g24655	7.08678e-159	1.78921	0.531	0.161	1.35613e-154	GO:0009535;GO:0005975;GO:0010598;GO:0030246;GO:0003824;GO:0009773	cellular_component;biological_process;cellular_component;molecular_function;molecular_function;biological_process	CC:chloroplast thylakoid membrane;BP:carbohydrate metabolic process;CC:NAD(P)H dehydrogenase complex (plastoquinone;MF:carbohydrate binding;MF:catalytic activity;BP:photosynthetic electron transport in photosystem I					ENOG410YEUY	S:Function unknown	XP_019186972.1	PREDICTED: photosynthetic NDH subunit of subcomplex B 2, chloroplastic [Ipomoea nil]	sp|Q94AQ8|PNSB2_ARATH	Photosynthetic NDH subunit of subcomplex B 2, chloroplastic OS=Arabidopsis thaliana OX=3702 GN=PNSB2 PE=2 SV=1
g38334	0	1.78522	0.994	0.535	0	GO:0019464;GO:0005960;GO:0005739	biological_process;cellular_component;cellular_component	BP:glycine decarboxylation via glycine cleavage system;CC:glycine cleavage complex;CC:mitochondrion	K02437	gcvH, GCSH	map00630;map00260	Glyoxylate and dicarboxylate metabolism;Glycine, serine and threonine metabolism	COG0509	E:Amino acid transport and metabolism	XP_031123865.1	glycine cleavage system H protein 3, mitochondrial-like [Ipomoea triloba]	sp|Q9LQL0|GCSH3_ARATH	Glycine cleavage system H protein 3, mitochondrial OS=Arabidopsis thaliana OX=3702 GN=GDH3 PE=1 SV=1	PF01597.20	GCV_H	Glycine cleavage H-protein
g41282	7.9097e-66	1.78238	0.277	0.086	1.5136e-61								COG0702;COG0702	G:Carbohydrate transport and metabolism;M:Cell wall/membrane/envelope biogenesis	XP_031123880.1	protein HIGH CHLOROPHYLL FLUORESCENCE PHENOTYPE 244, chloroplastic [Ipomoea triloba]	sp|P48279|YCF39_CYAPA	Uncharacterized protein ycf39 OS=Cyanophora paradoxa OX=2762 GN=ycf39 PE=3 SV=1	PF05368.14;PF13460.7;PF01370.22;PF01073.20;PF16912.6	NmrA;NAD_binding_10;Epimerase;3Beta_HSD;Glu_dehyd_C	NmrA-like family;NAD(P)H-binding;NAD dependent epimerase/dehydratase family;3-beta hydroxysteroid dehydrogenase/isomerase family;Glucose dehydrogenase C-terminus
g32562	5.20775e-68	1.78197	0.269	0.078	9.96556e-64	GO:0051287;GO:0050661;GO:0006006;GO:0016620	molecular_function;molecular_function;biological_process;molecular_function	MF:NAD binding;MF:NADP binding;BP:glucose metabolic process;MF:oxidoreductase activity, acting on the aldehyde or oxo group of donors, NAD or NADP as acceptor	K05298	GAPA	map00710	Carbon fixation in photosynthetic organisms	COG0057	G:Carbohydrate transport and metabolism	XP_031091764.1	glyceraldehyde-3-phosphate dehydrogenase A, chloroplastic [Ipomoea triloba]	sp|P09043|G3PA_TOBAC	Glyceraldehyde-3-phosphate dehydrogenase A, chloroplastic (Fragment) OS=Nicotiana tabacum OX=4097 GN=GAPA PE=2 SV=1	PF02800.21;PF00044.25	Gp_dh_C;Gp_dh_N	Glyceraldehyde 3-phosphate dehydrogenase, C-terminal domain;Glyceraldehyde 3-phosphate dehydrogenase, NAD binding domain
g4159	1.00797e-164	1.78196	0.611	0.214	1.92886e-160	GO:0009507	cellular_component	CC:chloroplast					ENOG410YMXP	S:Function unknown	XP_031114679.1	light-regulated protein, chloroplastic [Ipomoea triloba]	sp|Q03200|LIRP1_ORYSJ	Light-regulated protein, chloroplastic OS=Oryza sativa subsp. japonica OX=39947 GN=LIR1 PE=1 SV=1	PF07207.12	Lir1	Light regulated protein Lir1
g20614	9.74927e-121	1.78081	0.448	0.138	1.86562e-116	GO:0042626;GO:0016021;GO:0016887;GO:0005886;GO:0055085;GO:0005524	molecular_function;cellular_component;molecular_function;cellular_component;biological_process;molecular_function	MF:ATPase activity, coupled to transmembrane movement of substances;CC:integral component of membrane;MF:ATPase activity;CC:plasma membrane;BP:transmembrane transport;MF:ATP binding					COG1131	S:Function unknown	XP_031093688.1	ABC transporter G family member 8 [Ipomoea triloba]	sp|Q9FLX5|AB8G_ARATH	ABC transporter G family member 8 OS=Arabidopsis thaliana OX=3702 GN=ABCG8 PE=2 SV=1	PF01061.25;PF11992.9	ABC2_membrane;DUF3488	ABC-2 type transporter;Domain of unknown function (DUF3488
g37393	0	1.77485	0.991	0.642	0	GO:0009535;GO:0009941;GO:0016168;GO:0009522;GO:0009523;GO:0016021;GO:0010287;GO:0018298;GO:0009768;GO:0009416;GO:0009765	cellular_component;cellular_component;molecular_function;cellular_component;cellular_component;cellular_component;cellular_component;biological_process;biological_process;biological_process;biological_process	CC:chloroplast thylakoid membrane;CC:chloroplast envelope;MF:chlorophyll binding;CC:photosystem I;CC:photosystem II;CC:integral component of membrane;CC:plastoglobule;BP:protein-chromophore linkage;BP:photosynthesis, light harvesting in photosystem I;BP:response to light stimulus;BP:photosynthesis, light harvesting	K08912	LHCB1	map00196	Photosynthesis - antenna proteins			XP_031130706.1	uncharacterized protein LOC116032346 [Ipomoea triloba]	sp|P27495|CB24_TOBAC	Chlorophyll a-b binding protein 40, chloroplastic OS=Nicotiana tabacum OX=4097 GN=CAB40 PE=2 SV=1	PF00504.22	Chloroa_b-bind	Chlorophyll A-B binding protein
g27199	1.12179e-216	1.77215	0.676	0.219	2.14666e-212	GO:0009507	cellular_component	CC:chloroplast					ENOG4111JU1	S:Function unknown	XP_031107218.1	rhodanese-like domain-containing protein 14, chloroplastic [Ipomoea triloba]	sp|Q94A65|STR14_ARATH	Rhodanese-like domain-containing protein 14, chloroplastic OS=Arabidopsis thaliana OX=3702 GN=At4g27700 PE=2 SV=1	PF00581.21	Rhodanese	Rhodanese-like domain
g49933	0	1.76728	0.865	0.336	0								ENOG410ZFSV;ENOG410ZFG5	S:Function unknown;S:Function unknown	XP_031123519.1	uncharacterized protein LOC116026189 [Ipomoea triloba]
g38154	3.53899e-120	1.76718	0.429	0.125	6.77221e-116								ENOG410YFS1	S:Function unknown	XP_031123938.1	root phototropism protein 3-like [Ipomoea triloba]	sp|Q9FMF5|RPT3_ARATH	Root phototropism protein 3 OS=Arabidopsis thaliana OX=3702 GN=RPT3 PE=1 SV=2	PF03000.15	NPH3	NPH3 family
g20149	3.22771e-293	1.76672	0.834	0.298	6.17655e-289	GO:0009522;GO:0015979	cellular_component;biological_process	CC:photosystem I;BP:photosynthesis					ENOG410XY0C	S:Function unknown	XP_031095885.1	uncharacterized protein LOC116000031 [Ipomoea triloba]
g14093	6.80146e-194	1.76629	0.639	0.211	1.30153e-189				K23136	CYP82C4			COG2124	Q:Secondary metabolites biosynthesis, transport and catabolism	XP_031097488.1	cytochrome P450 82A3-like [Ipomoea triloba]	sp|O49858|C82A3_SOYBN	Cytochrome P450 82A3 OS=Glycine max OX=3847 GN=CYP82A3 PE=2 SV=1	PF00067.23	p450	Cytochrome P450
g53244	0	1.76574	0.981	0.522	0	GO:0009535;GO:0090391;GO:0016021;GO:0010196;GO:0045893;GO:0080167;GO:0010027;GO:0009515	cellular_component;biological_process;cellular_component;biological_process;biological_process;biological_process;biological_process;cellular_component	CC:chloroplast thylakoid membrane;BP:granum assembly;CC:integral component of membrane;BP:nonphotochemical quenching;BP:positive regulation of transcription, DNA-templated;BP:response to karrikin;BP:thylakoid membrane organization;CC:granal stacked thylakoid	CC:chloroplast thylakoid membrane;BP:granum assembly;CC:integral component of membrane;BP:nonphotochemical quenching;BP:positive regulation of transcription, DNA-templated;BP:response to karrikin;BP:thylakoid membrane organization;CC:granal stacked thylakoid				ENOG4111Z0N	S:Function unknown	XP_031104693.1	uncharacterized protein LOC116009712 [Ipomoea triloba]			PF06549.13	DUF1118	Protein of unknown function (DUF1118
g17481	5.98743e-119	1.76431	0.43	0.13	1.14575e-114	GO:0015976;GO:0004089;GO:0008270;GO:0009440	biological_process;molecular_function;molecular_function;biological_process	BP:carbon utilization;MF:carbonate dehydratase activity;MF:zinc ion binding;BP:cyanate catabolic process	K01673	cynT, can	map00910	Nitrogen metabolism	COG0288	T:Signal transduction mechanisms	XP_031096308.1	carbonic anhydrase 2-like [Ipomoea triloba]	sp|P16016|CAHC_SPIOL	Carbonic anhydrase, chloroplastic OS=Spinacia oleracea OX=3562 PE=1 SV=2	PF00484.20	Pro_CA	Carbonic anhydrase
g59979	0	1.76284	0.998	0.794	0	GO:0009535;GO:0016168;GO:0009522;GO:0009523;GO:0016021;GO:0018298;GO:0009768;GO:0009416;GO:0009765	cellular_component;molecular_function;cellular_component;cellular_component;cellular_component;biological_process;biological_process;biological_process;biological_process	CC:chloroplast thylakoid membrane;MF:chlorophyll binding;CC:photosystem I;CC:photosystem II;CC:integral component of membrane;BP:protein-chromophore linkage;BP:photosynthesis, light harvesting in photosystem I;BP:response to light stimulus;BP:photosynthesis, light harvesting	K08910	LHCA4	map00196	Photosynthesis - antenna proteins	ENOG4110JH3	S:Function unknown	XP_031118779.1	chlorophyll a-b binding protein P4, chloroplastic [Ipomoea triloba]	sp|Q9SQL2|CB24_PEA	Chlorophyll a-b binding protein P4, chloroplastic OS=Pisum sativum OX=3888 GN=lhcA-P4 PE=1 SV=1	PF00504.22	Chloroa_b-bind	Chlorophyll A-B binding protein
g59719	0	1.7583	0.983	0.551	0	GO:0016021;GO:0009512	cellular_component;cellular_component	CC:integral component of membrane;CC:cytochrome b6f complex					ENOG41119B4;ENOG410Y2Z3	S:Function unknown;S:Function unknown	XP_031125887.1	uncharacterized protein LOC116028339 [Ipomoea triloba]	sp|P80883|PETM_SPIOL	Cytochrome b6-f complex subunit 7 (Fragment) OS=Spinacia oleracea OX=3562 GN=petM PE=1 SV=1	PF08041.12	PetM	PetM family of cytochrome b6f complex subunit 7
g13945	1.03381e-85	1.75778	0.34	0.105	1.97831e-81								ENOG4111H8W	S:Function unknown	XP_031097244.1	plastid-lipid-associated protein 6, chloroplastic [Ipomoea triloba]	sp|Q9LW57|PAP6_ARATH	Plastid-lipid-associated protein 6, chloroplastic OS=Arabidopsis thaliana OX=3702 GN=PAP6 PE=1 SV=1	PF04755.13	PAP_fibrillin	PAP_fibrillin
g6549	1.27317e-63	1.75577	0.261	0.078	2.43635e-59				K19073	DVR	map00860	Porphyrin and chlorophyll metabolism	COG0702	L:Replication, recombination and repair	XP_031112888.1	divinyl chlorophyllide a 8-vinyl-reductase, chloroplastic [Ipomoea triloba]	sp|J9RYI6|DCVR_CUCSA	Divinyl chlorophyllide a 8-vinyl-reductase, chloroplastic OS=Cucumis sativus OX=3659 GN=DVR PE=1 SV=1	PF13460.7;PF05368.14;PF01370.22;PF00106.26;PF01073.20;PF08659.11;PF16363.6	NAD_binding_10;NmrA;Epimerase;adh_short;3Beta_HSD;KR;GDP_Man_Dehyd	NAD(P)H-binding;NmrA-like family;NAD dependent epimerase/dehydratase family;short chain dehydrogenase;3-beta hydroxysteroid dehydrogenase/isomerase family;KR domain;GDP-mannose 4,6 dehydratase
g45761	0	1.75253	0.999	0.825	0	GO:0009522;GO:0015979	cellular_component;biological_process	CC:photosystem I;BP:photosynthesis	K02698	psaK	map00195	Photosynthesis	ENOG4111RY5	S:Function unknown	XP_031111007.1	photosystem I reaction center subunit psaK, chloroplastic [Ipomoea triloba]	sp|Q9SUI5|PSAK_ARATH	Photosystem I reaction center subunit psaK, chloroplastic OS=Arabidopsis thaliana OX=3702 GN=PSAK PE=2 SV=2	PF01241.19	PSI_PSAK	Photosystem I psaG / psaK
g54681	9.90199e-173	1.74973	0.587	0.189	1.89485e-168	GO:0019901;GO:0000079	molecular_function;biological_process	MF:protein kinase binding;BP:regulation of cyclin-dependent protein serine/threonine kinase activity					ENOG4111TTK	S:Function unknown	XP_031104703.1	cyclin-U1-1 [Ipomoea triloba]	sp|Q9LJ45|CCU11_ARATH	Cyclin-U1-1 OS=Arabidopsis thaliana OX=3702 GN=CYCU1-1 PE=1 SV=1	PF08613.12;PF00134.24	Cyclin;Cyclin_N	Cyclin;Cyclin, N-terminal domain
g280	0	1.74922	1	0.887	0	GO:0009535;GO:0009941;GO:0016168;GO:0009522;GO:0009523;GO:0016021;GO:0018298;GO:0009765;GO:0009768;GO:0009416;GO:0046872;GO:0010287	cellular_component;cellular_component;molecular_function;cellular_component;cellular_component;cellular_component;biological_process;biological_process;biological_process;biological_process;molecular_function;cellular_component	CC:chloroplast thylakoid membrane;CC:chloroplast envelope;MF:chlorophyll binding;CC:photosystem I;CC:photosystem II;CC:integral component of membrane;BP:protein-chromophore linkage;BP:photosynthesis, light harvesting;BP:photosynthesis, light harvesting in photosystem I;BP:response to light stimulus;MF:metal ion binding;CC:plastoglobule	K08914	LHCB3	map00196	Photosynthesis - antenna proteins	ENOG410YAI6	S:Function unknown	XP_031116161.1	chlorophyll a-b binding protein 13, chloroplastic [Ipomoea triloba]	sp|P27489|CB23_SOLLC	Chlorophyll a-b binding protein 13, chloroplastic OS=Solanum lycopersicum OX=4081 GN=CAB13 PE=1 SV=1	PF00504.22	Chloroa_b-bind	Chlorophyll A-B binding protein
g7125	0	1.74866	0.926	0.369	0	GO:0046872;GO:0051537;GO:0009507;GO:0009055	molecular_function;molecular_function;cellular_component;molecular_function	MF:metal ion binding;MF:2 iron, 2 sulfur cluster binding;CC:chloroplast;MF:electron carrier activity	K02639	petF	map00195	Photosynthesis	COG0633	S:Function unknown	XP_031111439.1	ferredoxin C 1, chloroplastic [Ipomoea triloba]	sp|O23344|FDC1_ARATH	Ferredoxin C 1, chloroplastic OS=Arabidopsis thaliana OX=3702 GN=FDC1 PE=1 SV=1	PF00111.28	Fer2	2Fe-2S iron-sulfur cluster binding domain
g3164	2.38969e-70	1.74828	0.286	0.086	4.57291e-66	GO:0048046;GO:0005618;GO:0030145;GO:0045735	cellular_component;cellular_component;molecular_function;molecular_function	CC:apoplast;CC:cell wall;MF:manganese ion binding;MF:nutrient reservoir activity					ENOG410YB6M	S:Function unknown	XP_031115479.1	auxin-binding protein ABP20-like [Ipomoea triloba]	sp|O04011|ABP20_PRUPE	Auxin-binding protein ABP20 OS=Prunus persica OX=3760 GN=ABP20 PE=2 SV=1	PF00190.23;PF07883.12	Cupin_1;Cupin_2	Cupin;Cupin domain
g34283	0	1.74722	0.999	0.822	0	GO:0009535;GO:0009941;GO:0016168;GO:0009522;GO:0009523;GO:0016021;GO:0010287;GO:0018298;GO:0009768;GO:0009416;GO:0009765	cellular_component;cellular_component;molecular_function;cellular_component;cellular_component;cellular_component;cellular_component;biological_process;biological_process;biological_process;biological_process	CC:chloroplast thylakoid membrane;CC:chloroplast envelope;MF:chlorophyll binding;CC:photosystem I;CC:photosystem II;CC:integral component of membrane;CC:plastoglobule;BP:protein-chromophore linkage;BP:photosynthesis, light harvesting in photosystem I;BP:response to light stimulus;BP:photosynthesis, light harvesting	K08917	LHCB6	map00196	Photosynthesis - antenna proteins	ENOG410ZGWX	S:Function unknown	XP_031131052.1	chlorophyll a-b binding protein CP24 10A, chloroplastic [Ipomoea triloba]	sp|P27524|CB4A_SOLLC	Chlorophyll a-b binding protein CP24 10A, chloroplastic OS=Solanum lycopersicum OX=4081 GN=CAP10A PE=3 SV=1	PF00504.22	Chloroa_b-bind	Chlorophyll A-B binding protein
g50214	6.12449e-225	1.74673	0.687	0.226	1.17198e-220	GO:0016655;GO:0016021	molecular_function;cellular_component	MF:oxidoreductase activity, acting on NAD(P)H, quinone or similar compound as acceptor;CC:integral component of membrane					ENOG4112C5D	S:Function unknown	XP_031123011.1	NAD(P)H-quinone oxidoreductase subunit L, chloroplastic [Ipomoea triloba]	sp|Q9CAC5|NDHL_ARATH	NAD(P)H-quinone oxidoreductase subunit L, chloroplastic OS=Arabidopsis thaliana OX=3702 GN=ndhL PE=2 SV=1	PF10716.10	NdhL	NADH dehydrogenase transmembrane subunit
g52791	1.07361e-69	1.74105	0.282	0.085	2.05446e-65	GO:0006355;GO:0005634;GO:0008270	biological_process;cellular_component;molecular_function	BP:regulation of transcription, DNA-templated;CC:nucleus;MF:zinc ion binding	BP:regulation of transcription, DNA-templated;CC:nucleus;MF:zinc ion binding				COG5641	K:Transcription	XP_031099868.1	zinc finger protein CONSTANS-LIKE 16 [Ipomoea triloba]	sp|Q8RWD0|COL16_ARATH	Zinc finger protein CONSTANS-LIKE 16 OS=Arabidopsis thaliana OX=3702 GN=COL16 PE=1 SV=2	PF06203.15	CCT	CCT motif
g3803	0	1.7384	0.913	0.345	0	GO:0005737;GO:0048046;GO:0042132;GO:0016791;GO:0009941;GO:0009570;GO:0009579;GO:0005986;GO:0042742;GO:0030388;GO:0050278;GO:0005975;GO:0019252;GO:0006000;GO:0006002;GO:0006094	cellular_component;cellular_component;molecular_function;molecular_function;cellular_component;cellular_component;cellular_component;biological_process;biological_process;biological_process;molecular_function;biological_process;biological_process;biological_process;biological_process;biological_process	CC:cytoplasm;CC:apoplast;MF:fructose 1,6-bisphosphate 1-phosphatase activity;MF:phosphatase activity;CC:chloroplast envelope;CC:chloroplast stroma;CC:thylakoid;BP:sucrose biosynthetic process;BP:defense response to bacterium;BP:fructose 1,6-bisphosphate metabolic process;MF:sedoheptulose-bisphosphatase activity;BP:carbohydrate metabolic process;BP:starch biosynthetic process;BP:fructose metabolic…	K01100	E3.1.3.37	map00710	Carbon fixation in photosynthetic organisms	COG0158	G:Carbohydrate transport and metabolism	XP_031114725.1	sedoheptulose-1,7-bisphosphatase, chloroplastic-like [Ipomoea triloba]	sp|P46283|S17P_ARATH	Sedoheptulose-1,7-bisphosphatase, chloroplastic OS=Arabidopsis thaliana OX=3702 GN=At3g55800 PE=2 SV=1	PF00316.21;PF18913.1	FBPase;FBPase_C	Fructose-1-6-bisphosphatase, N-terminal domain;Fructose-1-6-bisphosphatase, C-terminal domain
g9751	0	1.7334	0.961	0.483	0	GO:0016021	cellular_component	CC:integral component of membrane					ENOG410YNZE	S:Function unknown	XP_031099528.1	tetraspanin-18-like [Ipomoea triloba]	sp|Q93XY5|TET18_ARATH	Tetraspanin-18 OS=Arabidopsis thaliana OX=3702 GN=TOM2AH2 PE=1 SV=1	PF02427.18;PF00335.21	PSI_PsaE;Tetraspanin	Photosystem I reaction centre subunit IV / PsaE;Tetraspanin family
g43385	0	1.7324	0.996	0.673	0	GO:0009535;GO:0016168;GO:0009522;GO:0009523;GO:0016021;GO:0010287;GO:0018298;GO:0009768;GO:0009416;GO:0009765	cellular_component;molecular_function;cellular_component;cellular_component;cellular_component;cellular_component;biological_process;biological_process;biological_process;biological_process	CC:chloroplast thylakoid membrane;MF:chlorophyll binding;CC:photosystem I;CC:photosystem II;CC:integral component of membrane;CC:plastoglobule;BP:protein-chromophore linkage;BP:photosynthesis, light harvesting in photosystem I;BP:response to light stimulus;BP:photosynthesis, light harvesting	K08909	LHCA3	map00196	Photosynthesis - antenna proteins	ENOG410ZM8E	S:Function unknown	XP_031130286.1	chlorophyll a-b binding protein 8, chloroplastic-like [Ipomoea triloba]	sp|P27522|CB13_SOLLC	Chlorophyll a-b binding protein 8, chloroplastic OS=Solanum lycopersicum OX=4081 GN=CAB8 PE=3 SV=1	PF00504.22	Chloroa_b-bind	Chlorophyll A-B binding protein
g58240	7.85627e-186	1.73156	0.625	0.203	1.50338e-181	GO:0045454;GO:0004601;GO:0005623;GO:0051920	biological_process;molecular_function;cellular_component;molecular_function	BP:cell redox homeostasis;MF:peroxidase activity;CC:cell;MF:peroxiredoxin activity	K03386	PRDX2_4, ahpC			COG0450	O:Posttranslational modification, protein turnover, chaperones	XP_031128168.1	2-Cys peroxiredoxin BAS1, chloroplastic [Ipomoea triloba]	sp|Q9C5R8|BAS1B_ARATH	2-Cys peroxiredoxin BAS1-like, chloroplastic OS=Arabidopsis thaliana OX=3702 GN=At5g06290 PE=2 SV=3	PF00578.22;PF08534.11;PF10417.10	AhpC-TSA;Redoxin;1-cysPrx_C	AhpC/TSA family;Redoxin;C-terminal domain of 1-Cys peroxiredoxin
g49608	1.33598e-237	1.73136	0.739	0.267	2.55654e-233	GO:0050662;GO:0003978;GO:0033499;GO:0003824;GO:0019388;GO:0005829	molecular_function;molecular_function;biological_process;molecular_function;biological_process;cellular_component	MF:coenzyme binding;MF:UDP-glucose 4-epimerase activity;BP:galactose catabolic process via UDP-galactose;MF:catalytic activity;BP:galactose catabolic process;CC:cytosol					ENOG410ZXC4	S:Function unknown	XP_031121964.1	chloroplast stem-loop binding protein of 41 kDa a, chloroplastic [Ipomoea triloba]	sp|Q9LYA9|CP41A_ARATH	Chloroplast stem-loop binding protein of 41 kDa a, chloroplastic OS=Arabidopsis thaliana OX=3702 GN=CSP41A PE=1 SV=1	PF01370.22;PF13460.7	Epimerase;NAD_binding_10	NAD dependent epimerase/dehydratase family;NAD(P)H-binding
g58875	0	1.73111	0.996	0.794	0	GO:0009535;GO:0016168;GO:0009522;GO:0009523;GO:0016021;GO:0018298;GO:0009765	cellular_component;molecular_function;cellular_component;cellular_component;cellular_component;biological_process;biological_process	CC:chloroplast thylakoid membrane;MF:chlorophyll binding;CC:photosystem I;CC:photosystem II;CC:integral component of membrane;BP:protein-chromophore linkage;BP:photosynthesis, light harvesting	K08915	LHCB4	map00196	Photosynthesis - antenna proteins	ENOG410YYUX	I:Lipid transport and metabolism	XP_031128459.1	chlorophyll a-b binding protein CP29.1, chloroplastic-like [Ipomoea triloba]	sp|Q07473|CB4A_ARATH	Chlorophyll a-b binding protein CP29.1, chloroplastic OS=Arabidopsis thaliana OX=3702 GN=LHCB4.1 PE=1 SV=1	PF00504.22	Chloroa_b-bind	Chlorophyll A-B binding protein
g53349	2.19842e-202	1.72287	0.651	0.207	4.2069e-198	GO:0009535;GO:0010598;GO:0009773	cellular_component;cellular_component;biological_process	CC:chloroplast thylakoid membrane;CC:NAD(P)H dehydrogenase complex (plastoquinone;BP:photosynthetic electron transport in photosystem I					ENOG410YHJ2	S:Function unknown	XP_031106782.1	photosynthetic NDH subunit of subcomplex B 4, chloroplastic [Ipomoea triloba]	sp|Q8RXS1|PNSB4_ARATH	Photosynthetic NDH subunit of subcomplex B 4, chloroplastic OS=Arabidopsis thaliana OX=3702 GN=PNSB4 PE=2 SV=1
g14824	2.45153e-163	1.72287	0.565	0.179	4.69126e-159	GO:0016021;GO:0009705;GO:0015743;GO:0009507	cellular_component;cellular_component;biological_process;cellular_component	CC:integral component of membrane;CC:plant-type vacuole membrane;BP:malate transport;CC:chloroplast					ENOG410XR8V	S:Function unknown	XP_031098108.1	uncharacterized protein LOC116002181 [Ipomoea triloba]			PF07534.17	TLD	TLD
g23981	4.1034e-175	1.71659	0.61	0.204	7.85226e-171	GO:0050661;GO:0051287;GO:0016620;GO:0004365;GO:0006006;GO:0009507	molecular_function;molecular_function;molecular_function;molecular_function;biological_process;cellular_component	MF:NADP binding;MF:NAD binding;MF:oxidoreductase activity, acting on the aldehyde or oxo group of donors, NAD or NADP as acceptor;MF:glyceraldehyde-3-phosphate dehydrogenase (NAD+) (phosphorylating) activity;BP:glucose metabolic process;CC:chloroplast	K05298	GAPA	map00710	Carbon fixation in photosynthetic organisms	COG0057	D:Cell cycle control, cell division, chromosome partitioning	XP_031103369.1	glyceraldehyde-3-phosphate dehydrogenase B, chloroplastic [Ipomoea triloba]	sp|P12859|G3PB_PEA	Glyceraldehyde-3-phosphate dehydrogenase B, chloroplastic OS=Pisum sativum OX=3888 GN=GAPB PE=1 SV=2	PF02800.21;PF00044.25;PF02672.16	Gp_dh_C;Gp_dh_N;CP12	Glyceraldehyde 3-phosphate dehydrogenase, C-terminal domain;Glyceraldehyde 3-phosphate dehydrogenase, NAD binding domain;CP12 domain
g58982	0	1.71467	0.998	0.774	0	GO:0019898;GO:0009654;GO:0005509;GO:0015979	cellular_component;cellular_component;molecular_function;biological_process	CC:extrinsic component of membrane;CC:photosystem II oxygen evolving complex;MF:calcium ion binding;BP:photosynthesis	K02717	psbP	map00195	Photosynthesis	ENOG4110ARY	S:Function unknown	AOW44265.1	oxygen-evolving enhancer [Ipomoea batatas]	sp|Q7DM39|PSBP1_TOBAC	Oxygen-evolving enhancer protein 2-1, chloroplastic OS=Nicotiana tabacum OX=4097 GN=PSBP1 PE=3 SV=2	PF01789.17	PsbP	PsbP
g333	0	1.71177	0.963	0.509	0	GO:0003735;GO:0009507;GO:0006412;GO:0005840	molecular_function;cellular_component;biological_process;cellular_component	MF:structural constituent of ribosome;CC:chloroplast;BP:translation;CC:ribosome	K02935	RP-L7, MRPL12, rplL	map03010	Ribosome	COG0222	J:Translation, ribosomal structure and biogenesis	XP_031114821.1	50S ribosomal protein L12, chloroplastic-like [Ipomoea triloba]	sp|P24929|RK12_TOBAC	50S ribosomal protein L12, chloroplastic OS=Nicotiana tabacum OX=4097 GN=RPL12 PE=1 SV=1	PF00542.20;PF16320.6	Ribosomal_L12;Ribosomal_L12_N	Ribosomal protein L7/L12 C-terminal domain;Ribosomal protein L7/L12 dimerisation domain
g42071	7.69655e-135	1.71171	0.49	0.152	1.47281e-130	GO:0016758;GO:0008194;GO:0043231;GO:0080044;GO:0080043	molecular_function;molecular_function;cellular_component;molecular_function;molecular_function	MF:transferase activity, transferring hexosyl groups;MF:UDP-glycosyltransferase activity;CC:intracellular membrane-bounded organelle;MF:quercetin 7-O-glucosyltransferase activity;MF:quercetin 3-O-glucosyltransferase activity					COG1819	S:Function unknown	XP_031114898.1	7-deoxyloganetin glucosyltransferase-like isoform X1 [Ipomoea triloba]	sp|F8WLS6|UGT6_CATRO	7-deoxyloganetin glucosyltransferase OS=Catharanthus roseus OX=4058 GN=UGT85A23 PE=1 SV=1	PF00201.19	UDPGT	UDP-glucoronosyl and UDP-glucosyl transferase
g31194	3.81401e-131	1.7025	0.435	0.12	7.2985e-127	GO:0009535;GO:0005737;GO:0016209;GO:0005623;GO:0008379;GO:0034599;GO:0045454;GO:0016491	cellular_component;cellular_component;molecular_function;cellular_component;molecular_function;biological_process;biological_process;molecular_function	CC:chloroplast thylakoid membrane;CC:cytoplasm;MF:antioxidant activity;CC:cell;MF:thioredoxin peroxidase activity;BP:cellular response to oxidative stress;BP:cell redox homeostasis;MF:oxidoreductase activity	K03564	BCP, PRXQ, DOT5			COG1225	O:Posttranslational modification, protein turnover, chaperones	XP_031132401.1	peroxiredoxin Q, chloroplastic-like [Ipomoea triloba]	sp|Q6QPJ6|PRXQ_POPJC	Peroxiredoxin Q, chloroplastic OS=Populus jackii OX=640484 GN=PRXQ PE=1 SV=1	PF00578.22;PF08534.11;PF02630.15	AhpC-TSA;Redoxin;SCO1-SenC	AhpC/TSA family;Redoxin;SCO1/SenC
g52761	1.51195e-187	1.70236	0.633	0.216	2.89327e-183	GO:0016021	cellular_component	CC:integral component of membrane					ENOG410YMXN	S:Function unknown	XP_031099682.1	uncharacterized protein LOC116003878 [Ipomoea triloba]
g7958	0	1.70025	0.971	0.457	0	GO:0005504;GO:0016021;GO:0009627	molecular_function;cellular_component;biological_process	MF:fatty acid binding;CC:integral component of membrane;BP:systemic acquired resistance					ENOG410YXDY	S:Function unknown	XP_031113450.1	putative lipid-transfer protein DIR1 [Ipomoea triloba]	sp|Q8W453|DIRL1_ARATH	Putative lipid-transfer protein DIR1 OS=Arabidopsis thaliana OX=3702 GN=DIR1 PE=1 SV=1	PF14368.7;PF00234.23	LTP_2;Tryp_alpha_amyl	Probable lipid transfer;Protease inhibitor/seed storage/LTP family
g13219	1.19659e-212	1.69711	0.674	0.218	2.28979e-208	GO:0009535;GO:0009941;GO:0010258;GO:0009817;GO:0016020;GO:0016655	cellular_component;cellular_component;biological_process;biological_process;cellular_component;molecular_function	CC:chloroplast thylakoid membrane;CC:chloroplast envelope;BP:NADH dehydrogenase complex (plastoquinone) assembly;BP:defense response to fungus, incompatible interaction;CC:membrane;MF:oxidoreductase activity, acting on NAD(P)H, quinone or similar compound as acceptor					ENOG4111IKJ	C:Energy production and conversion	XP_019180127.1	PREDICTED: NAD(P)H-quinone oxidoreductase subunit N, chloroplastic [Ipomoea nil]	sp|Q9LVM2|NDHN_ARATH	NAD(P)H-quinone oxidoreductase subunit N, chloroplastic OS=Arabidopsis thaliana OX=3702 GN=ndhN PE=2 SV=1	PF11909.9	NdhN	NADH-quinone oxidoreductase cyanobacterial subunit N
g62201	5.4611e-135	1.697	0.483	0.149	1.04504e-130				K15255	PIF1			ENOG4111SW7	S:Function unknown	XP_031096995.1	uncharacterized protein LOC116001246 [Ipomoea triloba]			PF05970.15	PIF1	PIF1-like helicase
g49871	0	1.6963	0.98	0.447	0	GO:0009507;GO:0080153	cellular_component;biological_process	CC:chloroplast;BP:negative regulation of reductive pentose-phosphate cycle					ENOG4112442	S:Function unknown	XP_031121482.1	calvin cycle protein CP12-1, chloroplastic-like [Ipomoea triloba]	sp|Q9LZP9|CP122_ARATH	Calvin cycle protein CP12-2, chloroplastic OS=Arabidopsis thaliana OX=3702 GN=CP12-2 PE=1 SV=1	PF02672.16	CP12	CP12 domain
g37389	0	1.69628	0.999	0.885	0	GO:0009535;GO:0009941;GO:0016168;GO:0009522;GO:0009523;GO:0016021;GO:0010287;GO:0018298;GO:0009768;GO:0009416;GO:0009765	cellular_component;cellular_component;molecular_function;cellular_component;cellular_component;cellular_component;cellular_component;biological_process;biological_process;biological_process;biological_process	CC:chloroplast thylakoid membrane;CC:chloroplast envelope;MF:chlorophyll binding;CC:photosystem I;CC:photosystem II;CC:integral component of membrane;CC:plastoglobule;BP:protein-chromophore linkage;BP:photosynthesis, light harvesting in photosystem I;BP:response to light stimulus;BP:photosynthesis, light harvesting	K08912	LHCB1	map00196	Photosynthesis - antenna proteins			XP_031130706.1	uncharacterized protein LOC116032346 [Ipomoea triloba]	sp|P27493|CB22_TOBAC	Chlorophyll a-b binding protein 21, chloroplastic OS=Nicotiana tabacum OX=4097 GN=CAB21 PE=2 SV=1	PF00504.22	Chloroa_b-bind	Chlorophyll A-B binding protein
g25992	4.74581e-196	1.6962	0.659	0.222	9.08158e-192	GO:0001682;GO:0004526	biological_process;molecular_function	BP:tRNA 5'-leader removal;MF:ribonuclease P activity	K18213	PRORP	map03013	RNA transport	COG0534	S:Function unknown	XP_031108886.1	proteinaceous RNase P 1, chloroplastic/mitochondrial-like [Ipomoea triloba]	sp|Q66GI4|PRRP1_ARATH	Proteinaceous RNase P 1, chloroplastic/mitochondrial OS=Arabidopsis thaliana OX=3702 GN=PRORP1 PE=1 SV=1	PF16953.6;PF17177.5;PF01535.21;PF13812.7	PRORP;PPR_long;PPR;PPR_3	Protein-only RNase P;Pentacotripeptide-repeat region of PRORP;PPR repeat;Pentatricopeptide repeat domain
g17459	7.32884e-242	1.69596	0.756	0.277	1.40245e-237	GO:0046872;GO:0030001;GO:0009507	molecular_function;biological_process;cellular_component	MF:metal ion binding;BP:metal ion transport;CC:chloroplast					ENOG4112AH6	S:Function unknown	XP_019161670.1	PREDICTED: uncharacterized protein LOC109158236 [Ipomoea nil]
g12245	2.68945e-82	1.6957	0.334	0.103	5.14653e-78								ENOG410YK5F	S:Function unknown	XP_031100865.1	uncharacterized protein LOC116004831 [Ipomoea triloba]
g38436	1.09166e-164	1.69493	0.595	0.208	2.089e-160	GO:0016021;GO:0010207;GO:0009507	cellular_component;biological_process;cellular_component	CC:integral component of membrane;BP:photosystem II assembly;CC:chloroplast							XP_031125196.1	protein PAM68, chloroplastic [Ipomoea triloba]	sp|O49668|PAM68_ARATH	Protein PAM68, chloroplastic OS=Arabidopsis thaliana OX=3702 GN=PAM68 PE=1 SV=1	PF11947.9	DUF3464	Photosynthesis affected mutant 68
g60730	0	1.6935	0.944	0.391	0	GO:0016301;GO:0005975;GO:0008974;GO:0005524;GO:0009507	molecular_function;biological_process;molecular_function;molecular_function;cellular_component	MF:kinase activity;BP:carbohydrate metabolic process;MF:phosphoribulokinase activity;MF:ATP binding;CC:chloroplast	K00855	PRK, prkB	map00710	Carbon fixation in photosynthetic organisms	COG0572;COG0572	I:Lipid transport and metabolism;Q:Secondary metabolites biosynthesis, transport and catabolism	XP_031118794.1	phosphoribulokinase, chloroplastic [Ipomoea triloba]	sp|P27774|KPPR_MESCR	Phosphoribulokinase, chloroplastic OS=Mesembryanthemum crystallinum OX=3544 PE=2 SV=1	PF00485.19	PRK	Phosphoribulokinase / Uridine kinase family
g9736	0	1.69245	0.997	0.76	0	GO:0016021	cellular_component	CC:integral component of membrane					ENOG410YNZE	S:Function unknown	XP_031099528.1	tetraspanin-18-like [Ipomoea triloba]	sp|Q93XY5|TET18_ARATH	Tetraspanin-18 OS=Arabidopsis thaliana OX=3702 GN=TOM2AH2 PE=1 SV=1	PF02427.18;PF00335.21	PSI_PsaE;Tetraspanin	Photosystem I reaction centre subunit IV / PsaE;Tetraspanin family
g5445	1.34803e-222	1.68986	0.727	0.267	2.57959e-218	GO:0016021	cellular_component	CC:integral component of membrane	K23051	ndhT			COG0484	O:Posttranslational modification, protein turnover, chaperones	XP_031112953.1	NAD(P)H-quinone oxidoreductase subunit T, chloroplastic [Ipomoea triloba]	sp|Q9SMS0|NDHT_ARATH	NAD(P)H-quinone oxidoreductase subunit T, chloroplastic OS=Arabidopsis thaliana OX=3702 GN=ndhT PE=1 SV=1	PF00226.32	DnaJ	DnaJ domain
g60499	0	1.68937	0.953	0.467	0	GO:0003735;GO:0006412;GO:0005840	molecular_function;biological_process;cellular_component	MF:structural constituent of ribosome;BP:translation;CC:ribosome	K02909	RP-L31, rpmE	map03010	Ribosome	COG0254	J:Translation, ribosomal structure and biogenesis	XP_031118595.1	50S ribosomal protein L31, chloroplastic [Ipomoea triloba]	sp|Q9FWS4|RK31_ARATH	50S ribosomal protein L31, chloroplastic OS=Arabidopsis thaliana OX=3702 GN=RPL31 PE=2 SV=1	PF01197.19	Ribosomal_L31	Ribosomal protein L31
g20810	0	1.68866	0.994	0.715	0	GO:0009522;GO:0015979	cellular_component;biological_process	CC:photosystem I;BP:photosynthesis	K02701	psaN	map00195	Photosynthesis	ENOG411281Y	S:Function unknown	XP_031094481.1	photosystem I reaction center subunit N, chloroplastic [Ipomoea triloba]	sp|P49107|PSAN_ARATH	Photosystem I reaction center subunit N, chloroplastic OS=Arabidopsis thaliana OX=3702 GN=PSAN PE=1 SV=2	PF05479.12	PsaN	Photosystem I reaction centre subunit N (PSAN or PSI-N
g46789	2.15376e-248	1.687	0.771	0.274	4.12144e-244	GO:0052740;GO:0008970;GO:0052739;GO:0006629	molecular_function;molecular_function;molecular_function;biological_process	MF:1-acyl-2-lysophosphatidylserine acylhydrolase activity;MF:phosphatidylcholine 1-acylhydrolase activity;MF:phosphatidylserine 1-acylhydrolase activity;BP:lipid metabolic process					ENOG410YCH0	S:Function unknown	XP_031124151.1	phospholipase A1-IIdelta-like [Ipomoea triloba]	sp|Q9SJI7|PLA20_ARATH	Phospholipase A1-IIdelta OS=Arabidopsis thaliana OX=3702 GN=At2g42690 PE=1 SV=1	PF01764.26	Lipase_3	Lipase (class 3
g3899	1.25953e-102	1.68274	0.412	0.138	2.41024e-98	GO:0009658;GO:0005634;GO:0008270;GO:0045893;GO:0003677	biological_process;cellular_component;molecular_function;biological_process;molecular_function	BP:chloroplast organization;CC:nucleus;MF:zinc ion binding;BP:positive regulation of transcription, DNA-templated;MF:DNA binding	BP:chloroplast organization;CC:nucleus;MF:zinc ion binding;BP:positive regulation of transcription, DNA-templated;MF:DNA binding				ENOG4111PGH	S:Function unknown	XP_031114774.1	uncharacterized protein LOC116018888 [Ipomoea triloba]
g5341	0	1.68136	0.999	0.846	0	GO:0045489;GO:0047262;GO:0000139;GO:0071555	biological_process;molecular_function;cellular_component;biological_process	BP:pectin biosynthetic process;MF:polygalacturonate 4-alpha-galacturonosyltransferase activity;CC:Golgi membrane;BP:cell wall organization	K13648	GAUT	map00520	Amino sugar and nucleotide sugar metabolism	ENOG410YA0P	M:Cell wall/membrane/envelope biogenesis	XP_031111991.1	probable galacturonosyltransferase 6 isoform X1 [Ipomoea triloba]	sp|Q9M9Y5|GAUT6_ARATH	Probable galacturonosyltransferase 6 OS=Arabidopsis thaliana OX=3702 GN=GAUT6 PE=2 SV=1	PF01501.21;PF07123.13;PF18404.2	Glyco_transf_8;PsbW;Glyco_transf_24	Glycosyl transferase family 8;Photosystem II reaction centre W protein (PsbW;Glucosyltransferase 24
g49962	6.58733e-89	1.68135	0.368	0.119	1.26055e-84	GO:0015031;GO:0016021;GO:0006457;GO:0008233;GO:0005524	biological_process;cellular_component;biological_process;molecular_function;molecular_function	BP:protein transport;CC:integral component of membrane;BP:protein folding;MF:peptidase activity;MF:ATP binding					ENOG410YPDJ	S:Function unknown	XP_031121560.1	uncharacterized protein LOC116024724 [Ipomoea triloba]
g20022	0	1.68128	0.999	0.809	0	GO:0009523;GO:0050982;GO:0016021;GO:0006820;GO:0005886;GO:0008381;GO:0015979	cellular_component;biological_process;cellular_component;biological_process;cellular_component;molecular_function;biological_process	CC:photosystem II;BP:detection of mechanical stimulus;CC:integral component of membrane;BP:anion transport;CC:plasma membrane;MF:mechanically-gated ion channel activity;BP:photosynthesis	K22048	MSL4S			ENOG410YXEC	S:Function unknown	XP_019151459.1	PREDICTED: uncharacterized protein LOC109148126 [Ipomoea nil]			PF06596.12	PsbX	Photosystem II reaction centre X protein (PsbX
g48926	0	1.68011	0.978	0.564	0	GO:0016021;GO:0015979;GO:0009538	cellular_component;biological_process;cellular_component	CC:integral component of membrane;BP:photosynthesis;CC:photosystem I reaction center	K02699	psaL	map00195	Photosynthesis	ENOG4111KFU	C:Energy production and conversion	XP_031123356.1	photosystem I reaction center subunit XI, chloroplastic [Ipomoea triloba]	sp|Q9SUI4|PSAL_ARATH	Photosystem I reaction center subunit XI, chloroplastic OS=Arabidopsis thaliana OX=3702 GN=PSAL PE=1 SV=2	PF02605.16	PsaL	Photosystem I reaction centre subunit XI
g16295	2.90572e-162	1.67847	0.591	0.218	5.56039e-158	GO:0010206	biological_process	BP:photosystem II repair					ENOG410XY5M	S:Function unknown	XP_031098831.1	thylakoid lumenal 16.5 kDa protein, chloroplastic [Ipomoea triloba]	sp|O22773|TL16_ARATH	Thylakoid lumenal 16.5 kDa protein, chloroplastic OS=Arabidopsis thaliana OX=3702 GN=At4g02530 PE=1 SV=3
g20458	0	1.67807	0.875	0.364	0	GO:0006729;GO:0008124	biological_process;molecular_function	BP:tetrahydrobiopterin biosynthetic process;MF:4-alpha-hydroxytetrahydrobiopterin dehydratase activity	K01724	PCBD, phhB	map00790	Folate biosynthesis	ENOG4111XUM	S:Function unknown	XP_031094988.1	probable pterin-4-alpha-carbinolamine dehydratase, chloroplastic [Ipomoea triloba]	sp|Q9LU63|ATP1_ARATH	Probable pterin-4-alpha-carbinolamine dehydratase, chloroplastic OS=Arabidopsis thaliana OX=3702 GN=ATP1 PE=1 SV=1	PF01329.20	Pterin_4a	Pterin 4 alpha carbinolamine dehydratase
g35016	0	1.67359	0.9	0.4	0	GO:0070180;GO:0015934;GO:0005840;GO:0022625;GO:0019843;GO:0003735;GO:0006412;GO:0000027	molecular_function;cellular_component;cellular_component;cellular_component;molecular_function;molecular_function;biological_process;biological_process	MF:large ribosomal subunit rRNA binding;CC:large ribosomal subunit;CC:ribosome;CC:cytosolic large ribosomal subunit;MF:rRNA binding;MF:structural constituent of ribosome;BP:translation;BP:ribosomal large subunit assembly	K02867	RP-L11, MRPL11, rplK	map03010	Ribosome	COG0080	P:Inorganic ion transport and metabolism	XP_019169768.1	PREDICTED: 50S ribosomal protein L11, chloroplastic [Ipomoea nil]	sp|Q9MAP3|RK11_ARATH	50S ribosomal protein L11, chloroplastic OS=Arabidopsis thaliana OX=3702 GN=RPL11 PE=2 SV=1	PF03946.15;PF00298.20	Ribosomal_L11_N;Ribosomal_L11	Ribosomal protein L11, N-terminal domain;Ribosomal protein L11, RNA binding domain
g7173	0	1.6726	0.995	0.628	0	GO:0009535;GO:0015979;GO:0009538	cellular_component;biological_process;cellular_component	CC:chloroplast thylakoid membrane;BP:photosynthesis;CC:photosystem I reaction center	K02692	psaD	map00195	Photosynthesis	ENOG4111HAV	L:Replication, recombination and repair	XP_031114154.1	photosystem I reaction center subunit II, chloroplastic-like [Ipomoea triloba]	sp|P29302|PSAD_NICSY	Photosystem I reaction center subunit II, chloroplastic OS=Nicotiana sylvestris OX=4096 GN=psaD PE=2 SV=1	PF02531.17	PsaD	PsaD
g59035	4.78977e-253	1.67166	0.758	0.258	9.1657e-249	GO:0016021;GO:0009507	cellular_component;cellular_component	CC:integral component of membrane;CC:chloroplast					ENOG4112747	S:Function unknown	XP_025795135.1	uncharacterized protein LOC112875481 [Panicum hallii]
g40891	5.59584e-221	1.67	0.729	0.263	1.07082e-216	GO:0102978;GO:0009507;GO:0008270;GO:0042558;GO:0016491	molecular_function;cellular_component;molecular_function;biological_process;molecular_function	MF:furaneol oxidoreductase activity;CC:chloroplast;MF:zinc ion binding;BP:pteridine-containing compound metabolic process;MF:oxidoreductase activity	K18980	EO, FaQR			COG0604	S:Function unknown	XP_031125433.1	2-methylene-furan-3-one reductase [Ipomoea triloba]	sp|K4BW79|ENOX_SOLLC	2-methylene-furan-3-one reductase OS=Solanum lycopersicum OX=4081 GN=EO PE=1 SV=1	PF13602.7;PF00107.27;PF08240.13	ADH_zinc_N_2;ADH_zinc_N;ADH_N	Zinc-binding dehydrogenase;Zinc-binding dehydrogenase;Alcohol dehydrogenase GroES-like domain
g39165	0	1.66975	0.902	0.391	0	GO:0009941;GO:0005840;GO:0005730;GO:0009570;GO:0003735;GO:0006412	cellular_component;cellular_component;cellular_component;cellular_component;molecular_function;biological_process	CC:chloroplast envelope;CC:ribosome;CC:nucleolus;CC:chloroplast stroma;MF:structural constituent of ribosome;BP:translation	K02881	RP-L18, MRPL18, rplR	map03010	Ribosome	COG0256	S:Function unknown	XP_031123892.1	50S ribosomal protein L18, chloroplastic-like [Ipomoea triloba]	sp|P82195|RK18_SPIOL	50S ribosomal protein L18, chloroplastic OS=Spinacia oleracea OX=3562 GN=RPL18 PE=1 SV=3	PF00861.23	Ribosomal_L18p	Ribosomal L18 of archaea, bacteria, mitoch. and chloroplast
g31496	6.07731e-155	1.66823	0.57	0.196	1.16295e-150	GO:0016021;GO:0016740;GO:0009507	cellular_component;molecular_function;cellular_component	CC:integral component of membrane;MF:transferase activity;CC:chloroplast					ENOG410Z19W	S:Function unknown	XP_031092847.1	uncharacterized protein LOC115997433 [Ipomoea triloba]
g30161	0	1.66781	0.997	0.718	0	GO:0015976;GO:0004089;GO:0008270;GO:0009440	biological_process;molecular_function;molecular_function;biological_process	BP:carbon utilization;MF:carbonate dehydratase activity;MF:zinc ion binding;BP:cyanate catabolic process	K01673	cynT, can	map00910	Nitrogen metabolism	COG0288	P:Inorganic ion transport and metabolism	XP_031108344.1	carbonic anhydrase 2-like [Ipomoea triloba]	sp|P27141|CAHC_TOBAC	Carbonic anhydrase, chloroplastic OS=Nicotiana tabacum OX=4097 PE=2 SV=1	PF00484.20	Pro_CA	Carbonic anhydrase
g60747	8.02231e-107	1.66699	0.414	0.128	1.53515e-102	GO:0016021	cellular_component	CC:integral component of membrane					ENOG410ZB2F	S:Function unknown	XP_031120121.1	uncharacterized protein LOC116023273 [Ipomoea triloba]
g38995	3.90041e-199	1.66456	0.676	0.228	7.46382e-195	GO:0043067;GO:0004190	biological_process;molecular_function	BP:regulation of programmed cell death;MF:aspartic-type endopeptidase activity					ENOG410XNV7	O:Posttranslational modification, protein turnover, chaperones	XP_031124836.1	aspartyl protease AED3-like [Ipomoea triloba]	sp|O04496|AED3_ARATH	Aspartyl protease AED3 OS=Arabidopsis thaliana OX=3702 GN=AED3 PE=1 SV=1	PF14543.7;PF00026.24;PF14541.7	TAXi_N;Asp;TAXi_C	Xylanase inhibitor N-terminal;Eukaryotic aspartyl protease;Xylanase inhibitor C-terminal
g24316	0	1.66435	0.997	0.669	0	GO:0009579;GO:0009570;GO:0005524;GO:0046863;GO:0042802;GO:0009507	cellular_component;cellular_component;molecular_function;molecular_function;molecular_function;cellular_component	CC:thylakoid;CC:chloroplast stroma;MF:ATP binding;MF:ribulose-1,5-bisphosphate carboxylase/oxygenase activator activity;MF:identical protein binding;CC:chloroplast					COG1222	O:Posttranslational modification, protein turnover, chaperones	AFU50381.1	chloroplast ribulose bisphosphate carboxylase/oxygenase activase small isoform [Ipomoea batatas]	sp|Q40460|RCA1_TOBAC	Ribulose bisphosphate carboxylase/oxygenase activase 1, chloroplastic OS=Nicotiana tabacum OX=4097 PE=1 SV=1	PF00004.30;PF06309.12	AAA;Torsin	ATPase family associated with various cellular activities (AAA;Torsin
g26205	1.66785e-71	1.66356	0.274	0.076	3.1916e-67								ENOG41117UE;ENOG410YKTH	U:Intracellular trafficking, secretion, and vesicular transport;S:Function unknown	XP_019183904.1	PREDICTED: 36.4 kDa proline-rich protein-like isoform X2 [Ipomoea nil]	sp|Q00451|PRF1_SOLLC	36.4 kDa proline-rich protein OS=Solanum lycopersicum OX=4081 GN=TPRP-F1 PE=2 SV=1	PF14547.7;PF14368.7	Hydrophob_seed;LTP_2	Hydrophobic seed protein;Probable lipid transfer
g50500	0	1.6617	0.994	0.673	0	GO:0009534;GO:0009523;GO:0016021;GO:0030145;GO:0005623;GO:0045454;GO:0015979	cellular_component;cellular_component;cellular_component;molecular_function;cellular_component;biological_process;biological_process	CC:chloroplast thylakoid;CC:photosystem II;CC:integral component of membrane;MF:manganese ion binding;CC:cell;BP:cell redox homeostasis;BP:photosynthesis	K02723	psbY	map00195	Photosynthesis	ENOG4111UZP	I:Lipid transport and metabolism	XP_031121904.1	photosystem II core complex proteins psbY, chloroplastic [Ipomoea triloba]	sp|P80470|PSBY_SPIOL	Photosystem II core complex proteins psbY, chloroplastic OS=Spinacia oleracea OX=3562 GN=PSBY PE=1 SV=2	PF06298.12	PsbY	Photosystem II protein Y (PsbY
g60272	0	1.65958	0.977	0.5	0	GO:0003735;GO:0005840;GO:0009507;GO:0006412;GO:0019843	molecular_function;cellular_component;cellular_component;biological_process;molecular_function	MF:structural constituent of ribosome;CC:ribosome;CC:chloroplast;BP:translation;MF:rRNA binding	K19035	PSRP6			ENOG410Y35U	S:Function unknown	XP_019152351.1	PREDICTED: 50S ribosomal protein 6, chloroplastic [Ipomoea nil]	sp|P82411|PSRP6_SPIOL	50S ribosomal protein 6, chloroplastic OS=Spinacia oleracea OX=3562 GN=PSRP6 PE=1 SV=1	PF17257.3	DUF5323	Family of unknown function (DUF5323
g34206	0	1.6594	0.908	0.366	0	GO:0006099;GO:0030060;GO:0005975;GO:0006108;GO:0019752	biological_process;molecular_function;biological_process;biological_process;biological_process	BP:tricarboxylic acid cycle;MF:L-malate dehydrogenase activity;BP:carbohydrate metabolic process;BP:malate metabolic process;BP:carboxylic acid metabolic process	K00026	MDH2	map00020;map00630;map00620;map00710;map00270	Citrate cycle (TCA cycle;Glyoxylate and dicarboxylate metabolism;Pyruvate metabolism;Carbon fixation in photosynthetic organisms;Cysteine and methionine metabolism	COG0039	C:Energy production and conversion	XP_031130302.1	malate dehydrogenase, glyoxysomal-like [Ipomoea triloba]	sp|P19446|MDHG_CITLA	Malate dehydrogenase, glyoxysomal OS=Citrullus lanatus OX=3654 PE=1 SV=1	PF02866.19;PF00056.24;PF01073.20	Ldh_1_C;Ldh_1_N;3Beta_HSD	lactate/malate dehydrogenase, alpha/beta C-terminal domain;lactate/malate dehydrogenase, NAD binding domain;3-beta hydroxysteroid dehydrogenase/isomerase family
g64072	0	1.65842	0.981	0.494	0	GO:0003735;GO:0006412;GO:0005840	molecular_function;biological_process;cellular_component	MF:structural constituent of ribosome;BP:translation;CC:ribosome	K02899	RP-L27, MRPL27, rpmA	map03010	Ribosome	COG0211	L:Replication, recombination and repair	XP_031117987.1	50S ribosomal protein L27, chloroplastic [Ipomoea triloba]	sp|P30155|RK27_TOBAC	50S ribosomal protein L27, chloroplastic OS=Nicotiana tabacum OX=4097 GN=RPL27 PE=1 SV=1	PF01016.20	Ribosomal_L27	Ribosomal L27 protein
g4365	3.82452e-85	1.65758	0.327	0.095	7.3186e-81	GO:0009535;GO:0016021	cellular_component;cellular_component	CC:chloroplast thylakoid membrane;CC:integral component of membrane					ENOG410ZHBE	S:Function unknown	XP_031112462.1	uncharacterized protein LOC116016366 isoform X1 [Ipomoea triloba]
g30343	6.3358e-87	1.65418	0.368	0.121	1.21242e-82	GO:0071555;GO:0005576;GO:0005975;GO:0004650	biological_process;cellular_component;biological_process;molecular_function	BP:cell wall organization;CC:extracellular region;BP:carbohydrate metabolic process;MF:polygalacturonase activity					COG5434	M:Cell wall/membrane/envelope biogenesis	XP_031091734.1	probable polygalacturonase [Ipomoea triloba]	sp|A7PZL3|PGLR_VITVI	Probable polygalacturonase OS=Vitis vinifera OX=29760 GN=GSVIVT00026920001 PE=1 SV=1	PF00295.18;PF12708.8;PF13229.7	Glyco_hydro_28;Pectate_lyase_3;Beta_helix	Glycosyl hydrolases family 28;Pectate lyase superfamily protein;Right handed beta helix region
g58267	1.86058e-164	1.65322	0.573	0.183	3.5604e-160	GO:0045454;GO:0004601;GO:0005623;GO:0051920	biological_process;molecular_function;cellular_component;molecular_function	BP:cell redox homeostasis;MF:peroxidase activity;CC:cell;MF:peroxiredoxin activity	K03386	PRDX2_4, ahpC			COG0450	O:Posttranslational modification, protein turnover, chaperones	XP_031128168.1	2-Cys peroxiredoxin BAS1, chloroplastic [Ipomoea triloba]	sp|Q9C5R8|BAS1B_ARATH	2-Cys peroxiredoxin BAS1-like, chloroplastic OS=Arabidopsis thaliana OX=3702 GN=At5g06290 PE=2 SV=3	PF00578.22;PF08534.11;PF10417.10	AhpC-TSA;Redoxin;1-cysPrx_C	AhpC/TSA family;Redoxin;C-terminal domain of 1-Cys peroxiredoxin
g31104	4.62673e-260	1.65178	0.789	0.305	8.85371e-256	GO:0015934;GO:0005840;GO:0042254;GO:0019843;GO:0003735;GO:0006412;GO:0009507	cellular_component;cellular_component;biological_process;molecular_function;molecular_function;biological_process;cellular_component	CC:large ribosomal subunit;CC:ribosome;BP:ribosome biogenesis;MF:rRNA binding;MF:structural constituent of ribosome;BP:translation;CC:chloroplast	K02864	RP-L10, MRPL10, rplJ	map03010	Ribosome	COG0244	S:Function unknown	XP_031090500.1	50S ribosomal protein L10, chloroplastic-like [Ipomoea triloba]	sp|O80362|RK10_TOBAC	50S ribosomal protein L10, chloroplastic OS=Nicotiana tabacum OX=4097 GN=RPL10 PE=2 SV=1
g5118	8.80048e-297	1.6514	0.879	0.367	1.68406e-292	GO:0032357;GO:0016787;GO:0006284;GO:0035485;GO:0051539;GO:0006281;GO:0000701;GO:0016021;GO:0016798;GO:0006298;GO:0006952;GO:0034039;GO:0003677;GO:0046872;GO:0005634;GO:0019104	molecular_function;molecular_function;biological_process;molecular_function;molecular_function;biological_process;molecular_function;cellular_component;molecular_function;biological_process;biological_process;molecular_function;molecular_function;molecular_function;cellular_component;molecular_function	MF:oxidized purine DNA binding;MF:hydrolase activity;BP:base-excision repair;MF:adenine/guanine mispair binding;MF:4 iron, 4 sulfur cluster binding;BP:DNA repair;MF:purine-specific mismatch base pair DNA N-glycosylase activity;CC:integral component of membrane;MF:hydrolase activity, acting on glycosyl bonds;BP:mismatch repair;BP:defense response;MF:8-oxo-7,8-dihydroguanine DNA N-glycosylase activ…	K03575;K08472	mutY;MLO	map03410	Base excision repair	COG1194	L:Replication, recombination and repair	CAN71629.1	hypothetical protein VITISV_015579 [Vitis vinifera]	sp|O49621|MLO1_ARATH	MLO-like protein 1 OS=Arabidopsis thaliana OX=3702 GN=MLO1 PE=1 SV=1	PF03094.16;PF00730.26;PF14815.7;PF11210.9;PF00633.24	Mlo;HhH-GPD;NUDIX_4;DUF2996;HHH	Mlo family;HhH-GPD superfamily base excision DNA repair protein;NUDIX domain;Protein of unknown function (DUF2996;Helix-hairpin-helix motif
g61561	0	1.64776	0.993	0.615	0	GO:0009535;GO:0016021;GO:0009523;GO:0015979;GO:0009507	cellular_component;cellular_component;cellular_component;biological_process;cellular_component	CC:chloroplast thylakoid membrane;CC:integral component of membrane;CC:photosystem II;BP:photosynthesis;CC:chloroplast	K03542	psbS	map00195	Photosynthesis	ENOG4111VNI	I:Lipid transport and metabolism	XP_031119441.1	photosystem II 22 kDa protein, chloroplastic [Ipomoea triloba]	sp|P54773|PSBS_SOLLC	Photosystem II 22 kDa protein, chloroplastic OS=Solanum lycopersicum OX=4081 GN=PSBS PE=3 SV=1	PF00504.22	Chloroa_b-bind	Chlorophyll A-B binding protein
g42645	8.42195e-292	1.64763	0.857	0.365	1.61162e-287	GO:0010019;GO:0009507;GO:0046906	biological_process;cellular_component;molecular_function	BP:chloroplast-nucleus signaling pathway;CC:chloroplast;MF:tetrapyrrole binding					ENOG410XQHG	S:Function unknown	XP_031111400.1	tetrapyrrole-binding protein, chloroplastic [Ipomoea triloba]	sp|Q9LX31|GUN4C_ARATH	Tetrapyrrole-binding protein, chloroplastic OS=Arabidopsis thaliana OX=3702 GN=GUN4 PE=1 SV=1	PF05419.13	GUN4	GUN4-like
g21557	0	1.64741	0.929	0.423	0	GO:0016021;GO:0015979;GO:0009523	cellular_component;biological_process;cellular_component	CC:integral component of membrane;BP:photosynthesis;CC:photosystem II	K22048	MSL4S			ENOG410YXEC	M:Cell wall/membrane/envelope biogenesis	XP_031102937.1	uncharacterized protein LOC116006631 [Ipomoea triloba]			PF06596.12	PsbX	Photosystem II reaction centre X protein (PsbX
g48682	7.23895e-174	1.6467	0.617	0.214	1.38525e-169	GO:0016021;GO:0009507;GO:0015979;GO:0009538	cellular_component;cellular_component;biological_process;cellular_component	CC:integral component of membrane;CC:chloroplast;BP:photosynthesis;CC:photosystem I reaction center	K02699	psaL	map00195	Photosynthesis	ENOG4111KFU	C:Energy production and conversion	XP_031123356.1	photosystem I reaction center subunit XI, chloroplastic [Ipomoea triloba]	sp|Q9SUI4|PSAL_ARATH	Photosystem I reaction center subunit XI, chloroplastic OS=Arabidopsis thaliana OX=3702 GN=PSAL PE=1 SV=2	PF02605.16	PsaL	Photosystem I reaction centre subunit XI
g37391	0	1.64252	0.953	0.478	0	GO:0009535;GO:0016168;GO:0009522;GO:0009523;GO:0016021;GO:0018298;GO:0009765	cellular_component;molecular_function;cellular_component;cellular_component;cellular_component;biological_process;biological_process	CC:chloroplast thylakoid membrane;MF:chlorophyll binding;CC:photosystem I;CC:photosystem II;CC:integral component of membrane;BP:protein-chromophore linkage;BP:photosynthesis, light harvesting	K08912	LHCB1	map00196	Photosynthesis - antenna proteins	ENOG410ZHBU	J:Translation, ribosomal structure and biogenesis	XP_019189279.1	PREDICTED: chlorophyll a-b binding protein of LHCII type 1 [Ipomoea nil]	sp|P27493|CB22_TOBAC	Chlorophyll a-b binding protein 21, chloroplastic OS=Nicotiana tabacum OX=4097 GN=CAB21 PE=2 SV=1	PF00504.22	Chloroa_b-bind	Chlorophyll A-B binding protein
g54057	0	1.63932	0.957	0.457	0	GO:0009570;GO:0090391;GO:0009507	cellular_component;biological_process;cellular_component	CC:chloroplast stroma;BP:granum assembly;CC:chloroplast					ENOG4111Q7E	U:Intracellular trafficking, secretion, and vesicular transport	XP_031104656.1	protein LHCP TRANSLOCATION DEFECT [Ipomoea triloba]	sp|Q8VY88|LTD_ARATH	Protein LHCP TRANSLOCATION DEFECT OS=Arabidopsis thaliana OX=3702 GN=LTD PE=1 SV=1
g7151	0	1.63482	0.923	0.438	0	GO:0003735;GO:0006412;GO:0005840	molecular_function;biological_process;cellular_component	MF:structural constituent of ribosome;BP:translation;CC:ribosome	K02902	RP-L28, MRPL28, rpmB	map03010	Ribosome	COG0227	S:Function unknown	XP_031111191.1	50S ribosomal protein L28, chloroplastic [Ipomoea triloba]	sp|P30956|RK28_TOBAC	50S ribosomal protein L28, chloroplastic OS=Nicotiana tabacum OX=4097 GN=RPL28 PE=1 SV=1	PF00830.20	Ribosomal_L28	Ribosomal L28 family
g52527	0	1.63462	0.957	0.428	0	GO:0006633;GO:0031177	biological_process;molecular_function	BP:fatty acid biosynthetic process;MF:phosphopantetheine binding					COG0236	S:Function unknown	XP_031105883.1	acyl carrier protein 1, chloroplastic-like [Ipomoea triloba]	sp|P93092|ACP1_CASGL	Acyl carrier protein 1, chloroplastic OS=Casuarina glauca OX=3522 GN=ACP1 PE=2 SV=1	PF00550.26;PF14573.7	PP-binding;PP-binding_2	Phosphopantetheine attachment site;Acyl-carrier
g61020	5.38702e-168	1.634	0.617	0.219	1.03086e-163	GO:0003993	molecular_function	MF:acid phosphatase activity					ENOG4111X3R	O:Posttranslational modification, protein turnover, chaperones	XP_031119916.1	acid phosphatase 1-like [Ipomoea triloba]	sp|P27061|PPA1_SOLLC	Acid phosphatase 1 OS=Solanum lycopersicum OX=4081 GN=APS1 PE=2 SV=1	PF03767.15	Acid_phosphat_B	HAD superfamily, subfamily IIIB (Acid phosphatase
g58673	0	1.63291	0.974	0.513	0	GO:0007219;GO:0016021;GO:0000139;GO:0004175;GO:0004190;GO:0005887;GO:0016485;GO:0005789;GO:0005634	biological_process;cellular_component;cellular_component;molecular_function;molecular_function;cellular_component;biological_process;cellular_component;cellular_component	BP:Notch signaling pathway;CC:integral component of membrane;CC:Golgi membrane;MF:endopeptidase activity;MF:aspartic-type endopeptidase activity;CC:integral component of plasma membrane;BP:protein processing;CC:endoplasmic reticulum membrane;CC:nucleus	K04505	PSEN1, PS1					XP_031128698.1	presenilin-like protein At1g08700 [Ipomoea triloba]	sp|O64668|PSNA_ARATH	Presenilin-like protein At1g08700 OS=Arabidopsis thaliana OX=3702 GN=At1g08700 PE=1 SV=1	PF01080.18	Presenilin	Presenilin
g43076	3.52654e-111	1.63222	0.44	0.145	6.74838e-107	GO:0044212;GO:0010200;GO:0009741;GO:0005634;GO:0031011;GO:0006355;GO:0009640;GO:0008270;GO:0080167;GO:2000306;GO:0002151;GO:0071339;GO:1900458	molecular_function;biological_process;biological_process;cellular_component;cellular_component;biological_process;biological_process;molecular_function;biological_process;biological_process;molecular_function;cellular_component;biological_process	MF:transcription regulatory region DNA binding;BP:response to chitin;BP:response to brassinosteroid;CC:nucleus;CC:Ino80 complex;BP:regulation of transcription, DNA-templated;BP:photomorphogenesis;MF:zinc ion binding;BP:response to karrikin;BP:positive regulation of photomorphogenesis;MF:G-quadruplex RNA binding;CC:MLL1 complex;BP:negative regulation of brassinosteroid mediated signaling pathway	MF:transcription regulatory region DNA binding;BP:response to chitin;BP:response to brassinosteroid;CC:nucleus;CC:Ino80 complex;BP:regulation of transcription, DNA-templated;BP:photomorphogenesis;MF:zinc ion binding;BP:response to karrikin;BP:positive regulation of photomorphogenesis;MF:G-quadruplex RNA binding;CC:MLL1 complex;BP:negative regulation of brassinosteroid mediated signaling pathway				ENOG410YIAM;ENOG410ZKKD	S:Function unknown;S:Function unknown	XP_031096266.1	B-box zinc finger protein 21-like [Ipomoea triloba]	sp|Q9LQZ7|BBX21_ARATH	B-box zinc finger protein 21 OS=Arabidopsis thaliana OX=3702 GN=BBX21 PE=1 SV=1	PF00643.25;PF16366.6	zf-B_box;CEBP_ZZ	B-box zinc finger;Cytoplasmic polyadenylation element-binding protein ZZ domain
g5543	1.61889e-65	1.63164	0.256	0.072	3.09791e-61	GO:0016021	cellular_component	CC:integral component of membrane					ENOG4111J8C	S:Function unknown	XP_031113950.1	insulin-induced gene 1 protein [Ipomoea triloba]			PF07281.13	INSIG	Insulin-induced protein (INSIG
g60411	4.06639e-181	1.62998	0.617	0.202	7.78144e-177	GO:0004497;GO:0016705;GO:0020037;GO:0016132;GO:0016021;GO:0010295;GO:0016125;GO:0010268;GO:0005506;GO:0007275;GO:0055114;GO:0016491	molecular_function;molecular_function;molecular_function;biological_process;cellular_component;molecular_function;biological_process;biological_process;molecular_function;biological_process;biological_process;molecular_function	MF:monooxygenase activity;MF:oxidoreductase activity, acting on paired donors, with incorporation or reduction of molecular oxygen;MF:heme binding;BP:brassinosteroid biosynthetic process;CC:integral component of membrane;MF:(+)-abscisic acid 8'-hydroxylase activity;BP:sterol metabolic process;BP:brassinosteroid homeostasis;MF:iron ion binding;BP:multicellular organism development;BP:oxidation-red…	K09843	CYP707A	map00906	Carotenoid biosynthesis	COG2124	Q:Secondary metabolites biosynthesis, transport and catabolism	XP_031118046.1	abscisic acid 8'-hydroxylase CYP707A1-like [Ipomoea triloba]	sp|A9QNE7|ABAH1_SOLLC	Abscisic acid 8'-hydroxylase CYP707A1 OS=Solanum lycopersicum OX=4081 GN=CYP707A1 PE=2 SV=1	PF00067.23;PF00504.22	p450;Chloroa_b-bind	Cytochrome P450;Chlorophyll A-B binding protein
g43775	2.53656e-170	1.62965	0.567	0.169	4.85396e-166	GO:0010598;GO:0016021;GO:0009507	cellular_component;cellular_component;cellular_component	CC:NAD(P)H dehydrogenase complex (plastoquinone;CC:integral component of membrane;CC:chloroplast	K23052	ndhU			ENOG410YHUJ	U:Intracellular trafficking, secretion, and vesicular transport	XP_031115882.1	NAD(P)H-quinone oxidoreductase subunit U, chloroplastic [Ipomoea triloba]	sp|Q84VQ4|NDHU_ARATH	NAD(P)H-quinone oxidoreductase subunit U, chloroplastic OS=Arabidopsis thaliana OX=3702 GN=ndhU PE=1 SV=1	PF00226.32	DnaJ	DnaJ domain
g33582	7.66475e-150	1.62941	0.586	0.218	1.46673e-145	GO:0070181;GO:0005840;GO:0003735;GO:0003723;GO:0006412;GO:0015935	molecular_function;cellular_component;molecular_function;molecular_function;biological_process;cellular_component	MF:small ribosomal subunit rRNA binding;CC:ribosome;MF:structural constituent of ribosome;MF:RNA binding;BP:translation;CC:small ribosomal subunit	K02968	RP-S20, rpsT	map03010	Ribosome	ENOG41129UT	J:Translation, ribosomal structure and biogenesis	XP_031090755.1	30S ribosomal protein S20, chloroplastic isoform X2 [Ipomoea triloba]	sp|Q9ASV6|RR20_ARATH	30S ribosomal protein S20, chloroplastic OS=Arabidopsis thaliana OX=3702 GN=RPS20 PE=2 SV=1	PF01649.19	Ribosomal_S20p	Ribosomal protein S20
g1172	0	1.62941	0.996	0.703	0	GO:0009535;GO:0042549;GO:0010207;GO:0010242;GO:0009654	cellular_component;biological_process;biological_process;molecular_function;cellular_component	CC:chloroplast thylakoid membrane;BP:photosystem II stabilization;BP:photosystem II assembly;MF:oxygen evolving activity;CC:photosystem II oxygen evolving complex	K02716	psbO	map00195	Photosynthesis	ENOG410XP4G	G:Carbohydrate transport and metabolism	XP_031116112.1	oxygen-evolving enhancer protein 1, chloroplastic-like [Ipomoea triloba]	sp|Q40459|PSBO_TOBAC	Oxygen-evolving enhancer protein 1, chloroplastic OS=Nicotiana tabacum OX=4097 GN=PSBO PE=2 SV=1	PF01716.19	MSP	Manganese-stabilising protein / photosystem II polypeptide
g54429	1.62026e-288	1.62856	0.848	0.346	3.10052e-284	GO:0015995;GO:0015979;GO:0016630;GO:0009507	biological_process;biological_process;molecular_function;cellular_component	BP:chlorophyll biosynthetic process;BP:photosynthesis;MF:protochlorophyllide reductase activity;CC:chloroplast	K00218	por	map00860	Porphyrin and chlorophyll metabolism	COG1028	K:Transcription	XP_031105633.1	protochlorophyllide reductase [Ipomoea triloba]	sp|Q9SDT1|POR_DAUCA	Protochlorophyllide reductase, chloroplastic OS=Daucus carota OX=4039 GN=POR1 PE=2 SV=1	PF00106.26;PF13561.7	adh_short;adh_short_C2	short chain dehydrogenase;Enoyl-(Acyl carrier protein) reductase
g27423	3.89437e-87	1.62751	0.358	0.111	7.45227e-83	GO:0009658;GO:0032502;GO:0003690;GO:0009507;GO:0006355	biological_process;biological_process;molecular_function;cellular_component;biological_process	BP:chloroplast organization;BP:developmental process;MF:double-stranded DNA binding;CC:chloroplast;BP:regulation of transcription, DNA-templated	BP:chloroplast organization;BP:developmental process;MF:double-stranded DNA binding;CC:chloroplast;BP:regulation of transcription, DNA-templated	MTERFD			ENOG410XT49	S:Function unknown	XP_010529872.1	PREDICTED: transcription termination factor MTERF6, chloroplastic/mitochondrial-like [Tarenaya hassleriana]	sp|Q9SZL6|MTEF6_ARATH	Transcription termination factor MTERF6, chloroplastic/mitochondrial OS=Arabidopsis thaliana OX=3702 GN=MTERF6 PE=2 SV=1	PF02536.15;PF02742.16	mTERF;Fe_dep_repr_C	mTERF;Iron dependent repressor, metal binding and dimerisation domain
g39004	0	1.6271	0.919	0.403	0	GO:0015934;GO:0005840;GO:0019843;GO:0003735;GO:0006412;GO:0009507	cellular_component;cellular_component;molecular_function;molecular_function;biological_process;cellular_component	CC:large ribosomal subunit;CC:ribosome;MF:rRNA binding;MF:structural constituent of ribosome;BP:translation;CC:chloroplast	K02879	RP-L17, MRPL17, rplQ	map03010	Ribosome	COG0203	S:Function unknown	XP_031123837.1	50S ribosomal protein L17, chloroplastic [Ipomoea triloba]	sp|O80363|RK17_TOBAC	50S ribosomal protein L17, chloroplastic OS=Nicotiana tabacum OX=4097 GN=RPL17 PE=2 SV=1	PF01196.20	Ribosomal_L17	Ribosomal protein L17
g6017	7.31964e-254	1.62285	0.791	0.289	1.40069e-249								ENOG41117E6	S:Function unknown	XP_019175938.1	PREDICTED: gibberellin-regulated protein 9-like [Ipomoea nil]	sp|Q8GWK5|GASA9_ARATH	Gibberellin-regulated protein 9 OS=Arabidopsis thaliana OX=3702 GN=GASA9 PE=3 SV=1
g5752	0	1.62233	0.918	0.404	0	GO:0003735;GO:0016021;GO:0005840;GO:0006412;GO:0019843	molecular_function;cellular_component;cellular_component;biological_process;molecular_function	MF:structural constituent of ribosome;CC:integral component of membrane;CC:ribosome;BP:translation;MF:rRNA binding	K02933	RP-L6, MRPL6, rplF	map03010	Ribosome	COG0097	S:Function unknown	XP_031113889.1	50S ribosomal protein L6, chloroplastic [Ipomoea triloba]	sp|O23049|RK6_ARATH	50S ribosomal protein L6, chloroplastic OS=Arabidopsis thaliana OX=3702 GN=RPL6 PE=2 SV=1	PF00347.24	Ribosomal_L6	Ribosomal protein L6
g47461	4.3257e-241	1.62103	0.775	0.31	8.27766e-237	GO:0030187;GO:0004059;GO:0004343;GO:0008080;GO:0009507	biological_process;molecular_function;molecular_function;molecular_function;cellular_component	BP:melatonin biosynthetic process;MF:aralkylamine N-acetyltransferase activity;MF:glucosamine 6-phosphate N-acetyltransferase activity;MF:N-acetyltransferase activity;CC:chloroplast	K22450	SNAT	map00380	Tryptophan metabolism	ENOG4111JMV	S:Function unknown	XP_031122954.1	serotonin N-acetyltransferase 2, chloroplastic [Ipomoea triloba]	sp|Q6Z1Y6|SNAT2_ORYSJ	Serotonin N-acetyltransferase 2, chloroplastic OS=Oryza sativa subsp. japonica OX=39947 GN=SNAT2 PE=1 SV=1	PF00583.26;PF13508.8;PF13673.8;PF08445.11	Acetyltransf_1;Acetyltransf_7;Acetyltransf_10;FR47	Acetyltransferase (GNAT) family;Acetyltransferase (GNAT) domain;Acetyltransferase (GNAT) domain;FR47-like protein
g29834	0	1.61812	0.972	0.436	0	GO:0009579;GO:0009535;GO:0016021	cellular_component;cellular_component;cellular_component	CC:thylakoid;CC:chloroplast thylakoid membrane;CC:integral component of membrane					ENOG4111UCM	S:Function unknown	XP_031107161.1	protein CURVATURE THYLAKOID 1C, chloroplastic-like isoform X1 [Ipomoea triloba]	sp|Q8LDD3|CUT1D_ARATH	Protein CURVATURE THYLAKOID 1D, chloroplastic OS=Arabidopsis thaliana OX=3702 GN=CURT1D PE=1 SV=1	PF14159.7	CAAD	CAAD domains of cyanobacterial aminoacyl-tRNA synthetase
g10534	0	1.61672	0.874	0.388	0	GO:0016021;GO:0016491	cellular_component;molecular_function	CC:integral component of membrane;MF:oxidoreductase activity	K14332	psaO	map00195	Photosynthesis	ENOG4112CG2	S:Function unknown	XP_031099359.1	photosystem I subunit O [Ipomoea triloba]	sp|Q949Q5|PSAO_ARATH	Photosystem I subunit O OS=Arabidopsis thaliana OX=3702 GN=PSAO PE=1 SV=1
g62017	0	1.61562	0.993	0.654	0								ENOG41116U9	S:Function unknown	XP_019177051.1	PREDICTED: pEARLI1-like lipid transfer protein 2 [Ipomoea nil]	sp|Q39176|ERLI1_ARATH	Lipid transfer protein EARLI 1 OS=Arabidopsis thaliana OX=3702 GN=EARLI1 PE=1 SV=1	PF14547.7;PF00234.23;PF14368.7	Hydrophob_seed;Tryp_alpha_amyl;LTP_2	Hydrophobic seed protein;Protease inhibitor/seed storage/LTP family;Probable lipid transfer
g43118	0	1.61532	0.92	0.393	0	GO:0016021;GO:0009512	cellular_component;cellular_component	CC:integral component of membrane;CC:cytochrome b6f complex					ENOG41119B4;ENOG410Y2Z3	S:Function unknown;S:Function unknown	XP_031090519.1	uncharacterized protein LOC115995582 [Ipomoea triloba]	sp|P80883|PETM_SPIOL	Cytochrome b6-f complex subunit 7 (Fragment) OS=Spinacia oleracea OX=3562 GN=petM PE=1 SV=1	PF08041.12	PetM	PetM family of cytochrome b6f complex subunit 7
g20189	2.10659e-127	1.61306	0.473	0.15	4.03117e-123	GO:0009507	cellular_component	CC:chloroplast					ENOG410YKCB	S:Function unknown	XP_019151354.1	PREDICTED: rubisco accumulation factor 1.1, chloroplastic [Ipomoea nil]	sp|Q9SR19|RAF2_ARATH	Rubisco accumulation factor 1.2, chloroplastic OS=Arabidopsis thaliana OX=3702 GN=RAF1.2 PE=1 SV=1	PF18087.2;PF18578.2	RuBisCo_chap_C;Raf1_N	Rubisco Assembly chaperone C-terminal domain;Rubisco accumulation factor 1 alpha helical domain
g6382	0	1.61056	0.974	0.504	0	GO:0009941;GO:0005840;GO:0003735;GO:0042644;GO:0006412;GO:0009507	cellular_component;cellular_component;molecular_function;cellular_component;biological_process;cellular_component	CC:chloroplast envelope;CC:ribosome;MF:structural constituent of ribosome;CC:chloroplast nucleoid;BP:translation;CC:chloroplast	K02904	RP-L29, rpmC	map03010	Ribosome	COG0255	T:Signal transduction mechanisms	XP_031113613.1	50S ribosomal protein L29, chloroplastic [Ipomoea triloba]	sp|P82248|RK29_SPIOL	50S ribosomal protein L29, chloroplastic OS=Spinacia oleracea OX=3562 GN=RPL29 PE=1 SV=2	PF00831.24	Ribosomal_L29	Ribosomal L29 protein
g20672	1.56335e-110	1.61055	0.434	0.142	2.99163e-106	GO:0000427;GO:0042793	cellular_component;biological_process	CC:plastid-encoded plastid RNA polymerase complex;BP:transcription from plastid promoter	CC:plastid-encoded plastid RNA polymerase complex;BP:transcription from plastid promoter				ENOG410YIZX	S:Function unknown	XP_019200307.1	PREDICTED: protein PLASTID TRANSCRIPTIONALLY ACTIVE 7 [Ipomoea nil]	sp|Q8VZV9|PTA7_ARATH	Protein PLASTID TRANSCRIPTIONALLY ACTIVE 7 OS=Arabidopsis thaliana OX=3702 GN=PTAC7 PE=1 SV=1
g47072	4.08982e-105	1.6102	0.39	0.114	7.82628e-101	GO:0004693;GO:0004674;GO:0051301;GO:0005524	molecular_function;molecular_function;biological_process;molecular_function	MF:cyclin-dependent protein serine/threonine kinase activity;MF:protein serine/threonine kinase activity;BP:cell division;MF:ATP binding	K07760	CDK			ENOG410XPP3	G:Carbohydrate transport and metabolism	XP_031121808.1	cell division control protein 2 homolog D-like [Ipomoea triloba]	sp|Q38775|CDC2D_ANTMA	Cell division control protein 2 homolog D OS=Antirrhinum majus OX=4151 GN=CDC2D PE=2 SV=1	PF00069.26;PF07714.18	Pkinase;PK_Tyr_Ser-Thr	Protein kinase domain;Protein tyrosine and serine/threonine kinase
g60475	3.05445e-96	1.6087	0.379	0.115	5.845e-92	GO:0009535;GO:0009507	cellular_component;cellular_component	CC:chloroplast thylakoid membrane;CC:chloroplast					ENOG4111Q50	S:Function unknown	XP_031119103.1	uncharacterized protein LOC116022510 [Ipomoea triloba]
g21133	0	1.60824	0.918	0.412	0	GO:0003735;GO:0005763;GO:0015935;GO:0003723;GO:0006412	molecular_function;cellular_component;cellular_component;molecular_function;biological_process	MF:structural constituent of ribosome;CC:mitochondrial small ribosomal subunit;CC:small ribosomal subunit;MF:RNA binding;BP:translation	K02988	RP-S5, MRPS5, rpsE	map03010	Ribosome	COG0098	V:Defense mechanisms	XP_031104109.1	30S ribosomal protein S5, chloroplastic [Ipomoea triloba]	sp|P93014|RR5_ARATH	30S ribosomal protein S5, chloroplastic OS=Arabidopsis thaliana OX=3702 GN=rps5 PE=2 SV=1	PF03719.16;PF00333.21	Ribosomal_S5_C;Ribosomal_S5	Ribosomal protein S5, C-terminal domain;Ribosomal protein S5, N-terminal domain
g12606	5.90856e-57	1.60822	0.255	0.082	1.13066e-52	GO:0016021	cellular_component	CC:integral component of membrane					ENOG4111X28	S:Function unknown	XP_031100411.1	uncharacterized protein LOC116004486 [Ipomoea triloba]			PF11460.9	DUF3007	Protein of unknown function (DUF3007
g12843	4.71416e-250	1.60738	0.772	0.286	9.02102e-246	GO:0009535;GO:0005840;GO:0009570;GO:0003735;GO:0032544;GO:0006412	cellular_component;cellular_component;cellular_component;molecular_function;biological_process;biological_process	CC:chloroplast thylakoid membrane;CC:ribosome;CC:chloroplast stroma;MF:structural constituent of ribosome;BP:plastid translation;BP:translation	K19032	PSRP3			ENOG4111VGA	S:Function unknown	XP_031098204.1	30S ribosomal protein 3-1, chloroplastic isoform X1 [Ipomoea triloba]	sp|Q9SX22|RRP31_ARATH	30S ribosomal protein 3-1, chloroplastic OS=Arabidopsis thaliana OX=3702 GN=At1g68590 PE=2 SV=1	PF04839.14	PSRP-3_Ycf65	Plastid and cyanobacterial ribosomal protein (PSRP-3 / Ycf65
g5240	0	1.60539	0.976	0.493	0	GO:0015979;GO:0009538	biological_process;cellular_component	BP:photosynthesis;CC:photosystem I reaction center	K02693	psaE	map00195	Photosynthesis	ENOG41122QJ	C:Energy production and conversion	XP_031113035.1	photosystem I reaction center subunit IV B, chloroplastic-like [Ipomoea triloba]	sp|Q41228|PSAEA_NICSY	Photosystem I reaction center subunit IV A, chloroplastic OS=Nicotiana sylvestris OX=4096 GN=PSAEA PE=1 SV=1	PF02427.18	PSI_PsaE	Photosystem I reaction centre subunit IV / PsaE
g53373	0	1.60382	0.976	0.627	0	GO:0009535;GO:0009941;GO:0015995;GO:0016628;GO:0033521;GO:0016627;GO:0102067;GO:0045550;GO:0071949;GO:0033385;GO:0015979;GO:0055114;GO:0010189	cellular_component;cellular_component;biological_process;molecular_function;biological_process;molecular_function;molecular_function;molecular_function;molecular_function;biological_process;biological_process;biological_process;biological_process	CC:chloroplast thylakoid membrane;CC:chloroplast envelope;BP:chlorophyll biosynthetic process;MF:oxidoreductase activity, acting on the CH-CH group of donors, NAD or NADP as acceptor;BP:phytyl diphosphate biosynthetic process;MF:oxidoreductase activity, acting on the CH-CH group of donors;MF:geranylgeranyl diphosphate reductase activity;MF:geranylgeranyl reductase activity;MF:FAD binding;BP:geran…	K10960	chlP, bchP	map00860;map00900	Porphyrin and chlorophyll metabolism;Terpenoid backbone biosynthesis	COG0644	L:Replication, recombination and repair	XP_031105696.1	geranylgeranyl diphosphate reductase, chloroplastic [Ipomoea triloba]	sp|Q9ZS34|CHLP_TOBAC	Geranylgeranyl diphosphate reductase, chloroplastic OS=Nicotiana tabacum OX=4097 GN=CHLP PE=2 SV=1	PF01494.20;PF01134.23;PF07992.15	FAD_binding_3;GIDA;Pyr_redox_2	FAD binding domain;Glucose inhibited division protein A;Pyridine nucleotide-disulphide oxidoreductase
g49063	1.71761e-145	1.60177	0.54	0.187	3.28682e-141	GO:0009579;GO:0015995;GO:0048529;GO:0009507	cellular_component;biological_process;molecular_function;cellular_component	CC:thylakoid;BP:chlorophyll biosynthetic process;MF:magnesium-protoporphyrin IX monomethyl ester (oxidative) cyclase activity;CC:chloroplast					ENOG4111TQT	S:Function unknown	XP_031123095.1	uncharacterized protein LOC116025866 isoform X1 [Ipomoea triloba]	sp|P72777|YC54L_SYNY3	Ycf54-like protein OS=Synechocystis sp. (strain PCC 6803 / Kazusa) OX=1111708 GN=slr1780 PE=1 SV=1	PF10674.10	Ycf54	Protein of unknown function (DUF2488
g13564	0	1.60138	0.998	0.827	0	GO:0009535;GO:0016168;GO:0009522;GO:0009523;GO:0016021;GO:0018298;GO:0009768;GO:0009416;GO:0046872;GO:0009765	cellular_component;molecular_function;cellular_component;cellular_component;cellular_component;biological_process;biological_process;biological_process;molecular_function;biological_process	CC:chloroplast thylakoid membrane;MF:chlorophyll binding;CC:photosystem I;CC:photosystem II;CC:integral component of membrane;BP:protein-chromophore linkage;BP:photosynthesis, light harvesting in photosystem I;BP:response to light stimulus;MF:metal ion binding;BP:photosynthesis, light harvesting	K08908	LHCA2	map00196	Photosynthesis - antenna proteins	ENOG410XTCT	S:Function unknown	XP_019180565.1	PREDICTED: chlorophyll a-b binding protein 7, chloroplastic isoform X2 [Ipomoea nil]	sp|P10708|CB12_SOLLC	Chlorophyll a-b binding protein 7, chloroplastic OS=Solanum lycopersicum OX=4081 GN=CAB7 PE=3 SV=1	PF00504.22	Chloroa_b-bind	Chlorophyll A-B binding protein
g13834	0	1.59769	0.98	0.584	0	GO:0003735;GO:0005840;GO:0003723;GO:0006412	molecular_function;cellular_component;molecular_function;biological_process	MF:structural constituent of ribosome;CC:ribosome;MF:RNA binding;BP:translation	K02952	RP-S13, rpsM	map03010	Ribosome	COG0099	S:Function unknown	XP_031099098.1	30S ribosomal protein S13, chloroplastic-like [Ipomoea triloba]	sp|P82163|RR13_SPIOL	30S ribosomal protein S13, chloroplastic OS=Spinacia oleracea OX=3562 GN=RPS13 PE=1 SV=3	PF00416.23	Ribosomal_S13	Ribosomal protein S13/S18
g876	1.3098e-129	1.59639	0.473	0.147	2.50643e-125								COG1404	O:Posttranslational modification, protein turnover, chaperones	XP_031116943.1	subtilisin-like protease SBT3.9 isoform X1 [Ipomoea triloba]	sp|Q9MAP7|SBT35_ARATH	Subtilisin-like protease SBT3.5 OS=Arabidopsis thaliana OX=3702 GN=SBT3.5 PE=1 SV=1	PF00082.23;PF17766.2;PF05922.17	Peptidase_S8;fn3_6;Inhibitor_I9	Subtilase family;Fibronectin type-III domain;Peptidase inhibitor I9
g25380	5.58381e-226	1.59533	0.76	0.27	1.06852e-221	GO:0044375;GO:0005779;GO:0005778;GO:0016559	biological_process;cellular_component;cellular_component;biological_process	BP:regulation of peroxisome size;CC:integral component of peroxisomal membrane;CC:peroxisomal membrane;BP:peroxisome fission					ENOG4111NS6	S:Function unknown	XP_019191744.1	PREDICTED: uncharacterized protein LOC109186275 [Ipomoea nil]	sp|Q01IH3|PX114_ORYSI	Peroxisomal membrane protein 11-4 OS=Oryza sativa subsp. indica OX=39946 GN=PEX11-4 PE=2 SV=1	PF05648.15;PF12937.8;PF00646.34	PEX11;F-box-like;F-box	Peroxisomal biogenesis factor 11 (PEX11;F-box-like;F-box domain
g33901	4.25858e-211	1.59491	0.689	0.227	8.14922e-207	GO:0009579;GO:0009535;GO:0016021	cellular_component;cellular_component;cellular_component	CC:thylakoid;CC:chloroplast thylakoid membrane;CC:integral component of membrane					ENOG4112195	S:Function unknown	XP_031090742.1	protein CURVATURE THYLAKOID 1B, chloroplastic [Ipomoea triloba]	sp|Q8LCA1|CUT1B_ARATH	Protein CURVATURE THYLAKOID 1B, chloroplastic OS=Arabidopsis thaliana OX=3702 GN=CURT1B PE=1 SV=2	PF14159.7	CAAD	CAAD domains of cyanobacterial aminoacyl-tRNA synthetase
g31521	7.15801e-85	1.59427	0.335	0.099	1.36976e-80	GO:0009535;GO:0009570;GO:0009507	cellular_component;cellular_component;cellular_component	CC:chloroplast thylakoid membrane;CC:chloroplast stroma;CC:chloroplast					ENOG410YCUP	S:Function unknown	XP_031093100.1	ACT domain-containing protein ACR11-like [Ipomoea triloba]	sp|Q9FZ47|ACR11_ARATH	ACT domain-containing protein ACR11 OS=Arabidopsis thaliana OX=3702 GN=ACR11 PE=1 SV=1
g1169	0	1.59259	0.911	0.409	0	GO:0009535;GO:0009534	cellular_component;cellular_component	CC:chloroplast thylakoid membrane;CC:chloroplast thylakoid					ENOG411155W	S:Function unknown	XP_031116450.1	uncharacterized protein LOC116020106 [Ipomoea triloba]
g41799	2.89508e-218	1.59171	0.744	0.272	5.54003e-214	GO:0005737;GO:0043231;GO:0006898;GO:0072583;GO:0030276;GO:0031982;GO:0072318	cellular_component;cellular_component;biological_process;biological_process;molecular_function;cellular_component;biological_process	CC:cytoplasm;CC:intracellular membrane-bounded organelle;BP:receptor-mediated endocytosis;BP:clathrin-dependent endocytosis;MF:clathrin binding;CC:vesicle;BP:clathrin coat disassembly					ENOG41129H2;ENOG410YGT5;ENOG410YDET	O:Posttranslational modification, protein turnover, chaperones;S:Function unknown;S:Function unknown	XP_031126238.1	J domain-containing protein required for chloroplast accumulation response 1 [Ipomoea triloba]	sp|Q9C9Q4|JAC1_ARATH	J domain-containing protein required for chloroplast accumulation response 1 OS=Arabidopsis thaliana OX=3702 GN=JAC1 PE=1 SV=1
g24312	0	1.59124	0.944	0.465	0	GO:0009535;GO:0010207;GO:0009644;GO:0007623;GO:0009523	cellular_component;biological_process;biological_process;biological_process;cellular_component	CC:chloroplast thylakoid membrane;BP:photosystem II assembly;BP:response to high light intensity;BP:circadian rhythm;CC:photosystem II					ENOG410YTYC	S:Function unknown	XP_031103410.1	light-harvesting complex-like protein OHP1, chloroplastic isoform X2 [Ipomoea triloba]	sp|O81208|OHP1_ARATH	Light-harvesting complex-like protein OHP1, chloroplastic OS=Arabidopsis thaliana OX=3702 GN=OHP1 PE=1 SV=1
g2029	2.68261e-74	1.5897	0.306	0.094	5.13344e-70										XP_031115277.1	uncharacterized protein LOC116019268 [Ipomoea triloba]
g8699	6.55564e-123	1.5894	0.468	0.152	1.25449e-118	GO:0016021;GO:0010190;GO:0009507	cellular_component;biological_process;cellular_component	CC:integral component of membrane;BP:cytochrome b6f complex assembly;CC:chloroplast					ENOG4111H41	S:Function unknown	XP_031113717.1	protein COFACTOR ASSEMBLY OF COMPLEX C SUBUNIT B CCB1, chloroplastic [Ipomoea triloba]	sp|Q9LSE4|CCB1_ARATH	Protein COFACTOR ASSEMBLY OF COMPLEX C SUBUNIT B CCB1, chloroplastic OS=Arabidopsis thaliana OX=3702 GN=CCB1 PE=1 SV=1	PF12046.9	CCB1	Cofactor assembly of complex C subunit B
g32551	0	1.58811	0.988	0.541	0	GO:0051287;GO:0050661;GO:0006006;GO:0016620	molecular_function;molecular_function;biological_process;molecular_function	MF:NAD binding;MF:NADP binding;BP:glucose metabolic process;MF:oxidoreductase activity, acting on the aldehyde or oxo group of donors, NAD or NADP as acceptor	K05298	GAPA	map00710	Carbon fixation in photosynthetic organisms	COG0057	S:Function unknown	XP_031091764.1	glyceraldehyde-3-phosphate dehydrogenase A, chloroplastic [Ipomoea triloba]	sp|P25856|G3PA1_ARATH	Glyceraldehyde-3-phosphate dehydrogenase GAPA1, chloroplastic OS=Arabidopsis thaliana OX=3702 GN=GAPA1 PE=1 SV=3	PF02800.21;PF00044.25	Gp_dh_C;Gp_dh_N	Glyceraldehyde 3-phosphate dehydrogenase, C-terminal domain;Glyceraldehyde 3-phosphate dehydrogenase, NAD binding domain
g50581	0	1.58673	0.998	0.884	0	GO:0009535;GO:0016168;GO:0009522;GO:0009523;GO:0016021;GO:0010287;GO:0018298;GO:0009768;GO:0009416;GO:0009765	cellular_component;molecular_function;cellular_component;cellular_component;cellular_component;cellular_component;biological_process;biological_process;biological_process;biological_process	CC:chloroplast thylakoid membrane;MF:chlorophyll binding;CC:photosystem I;CC:photosystem II;CC:integral component of membrane;CC:plastoglobule;BP:protein-chromophore linkage;BP:photosynthesis, light harvesting in photosystem I;BP:response to light stimulus;BP:photosynthesis, light harvesting	K08916	LHCB5	map00196	Photosynthesis - antenna proteins	ENOG41110WY	S:Function unknown	XP_031121995.1	chlorophyll a-b binding protein CP26, chloroplastic [Ipomoea triloba]	sp|Q9XF89|CB5_ARATH	Chlorophyll a-b binding protein CP26, chloroplastic OS=Arabidopsis thaliana OX=3702 GN=LHCB5 PE=1 SV=1	PF00504.22	Chloroa_b-bind	Chlorophyll A-B binding protein
g43460	0	1.5811	0.926	0.436	0	GO:0009579;GO:0009941;GO:0005840;GO:0022625;GO:0009570;GO:0003735;GO:0017148;GO:0006412;GO:0003729	cellular_component;cellular_component;cellular_component;cellular_component;cellular_component;molecular_function;biological_process;biological_process;molecular_function	CC:thylakoid;CC:chloroplast envelope;CC:ribosome;CC:cytosolic large ribosomal subunit;CC:chloroplast stroma;MF:structural constituent of ribosome;BP:negative regulation of translation;BP:translation;MF:mRNA binding	K02871	RP-L13, MRPL13, rplM	map03010	Ribosome	COG0102	S:Function unknown	XP_031109674.1	50S ribosomal protein L13, chloroplastic [Ipomoea triloba]	sp|Q9SYL9|RK13_ARATH	50S ribosomal protein L13, chloroplastic OS=Arabidopsis thaliana OX=3702 GN=RPL13 PE=2 SV=1	PF00572.19	Ribosomal_L13	Ribosomal protein L13
g24433	2.50285e-243	1.57996	0.781	0.296	4.78946e-239	GO:0009507	cellular_component	CC:chloroplast					ENOG4111PM4	S:Function unknown	XP_019187017.1	PREDICTED: rhodanese-like domain-containing protein 10 [Ipomoea nil]	sp|Q9SR92|STR10_ARATH	Rhodanese-like domain-containing protein 10 OS=Arabidopsis thaliana OX=3702 GN=STR10 PE=2 SV=1	PF00581.21	Rhodanese	Rhodanese-like domain
g29379	0	1.57941	0.997	0.622	0	GO:0005829;GO:0030388;GO:0006096;GO:0004332	cellular_component;biological_process;biological_process;molecular_function	CC:cytosol;BP:fructose 1,6-bisphosphate metabolic process;BP:glycolytic process;MF:fructose-bisphosphate aldolase activity	K01623	ALDO	map00010;map00030;map00051;map00710	Glycolysis / Gluconeogenesis;Pentose phosphate pathway;Fructose and mannose metabolism;Carbon fixation in photosynthetic organisms	COG3588	S:Function unknown	XP_031110346.1	fructose-bisphosphate aldolase 2, chloroplastic [Ipomoea triloba]	sp|Q944G9|ALFP2_ARATH	Fructose-bisphosphate aldolase 2, chloroplastic OS=Arabidopsis thaliana OX=3702 GN=FBA2 PE=1 SV=2	PF00274.20	Glycolytic	Fructose-bisphosphate aldolase class-I
g7161	3.02654e-130	1.57833	0.507	0.173	5.79159e-126	GO:0009536;GO:0015979;GO:0009538	cellular_component;biological_process;cellular_component	CC:plastid;BP:photosynthesis;CC:photosystem I reaction center	K02692	psaD	map00195	Photosynthesis	ENOG4111HAV	C:Energy production and conversion	XP_031114154.1	photosystem I reaction center subunit II, chloroplastic-like [Ipomoea triloba]	sp|P29302|PSAD_NICSY	Photosystem I reaction center subunit II, chloroplastic OS=Nicotiana sylvestris OX=4096 GN=psaD PE=2 SV=1	PF02531.17	PsaD	PsaD
g55047	5.8551e-153	1.57809	0.539	0.174	1.12043e-148	GO:0009535;GO:0005737;GO:0016021;GO:0016209;GO:0005623;GO:0008379;GO:0034599;GO:0045454;GO:0016491	cellular_component;cellular_component;cellular_component;molecular_function;cellular_component;molecular_function;biological_process;biological_process;molecular_function	CC:chloroplast thylakoid membrane;CC:cytoplasm;CC:integral component of membrane;MF:antioxidant activity;CC:cell;MF:thioredoxin peroxidase activity;BP:cellular response to oxidative stress;BP:cell redox homeostasis;MF:oxidoreductase activity	K03564	BCP, PRXQ, DOT5			COG1225	O:Posttranslational modification, protein turnover, chaperones	XP_019192970.1	PREDICTED: peroxiredoxin Q, chloroplastic-like [Ipomoea nil]	sp|Q6QPJ6|PRXQ_POPJC	Peroxiredoxin Q, chloroplastic OS=Populus jackii OX=640484 GN=PRXQ PE=1 SV=1	PF00578.22;PF08534.11;PF02630.15;PF13905.7	AhpC-TSA;Redoxin;SCO1-SenC;Thioredoxin_8	AhpC/TSA family;Redoxin;SCO1/SenC;Thioredoxin-like
g45581	9.07588e-68	1.57713	0.32	0.113	1.73676e-63	GO:0009535;GO:0051252;GO:1901259;GO:1990904;GO:0003723;GO:0009507;GO:0003729;GO:0006397	cellular_component;biological_process;biological_process;cellular_component;molecular_function;cellular_component;molecular_function;biological_process	CC:chloroplast thylakoid membrane;BP:regulation of RNA metabolic process;BP:chloroplast rRNA processing;CC:ribonucleoprotein complex;MF:RNA binding;CC:chloroplast;MF:mRNA binding;BP:mRNA processing	K11294	NCL, NSR1			COG0724;ENOG410YBZP	S:Function unknown;S:Function unknown	XP_031110978.1	33 kDa ribonucleoprotein, chloroplastic [Ipomoea triloba]	sp|P19684|ROC5_NICSY	33 kDa ribonucleoprotein, chloroplastic OS=Nicotiana sylvestris OX=4096 PE=1 SV=1	PF00076.23	RRM_1	RNA recognition motif. (a.k.a. RRM, RBD, or RNP domain
g16958	0	1.57649	0.98	0.461	0	GO:0005773;GO:0016021;GO:0015250;GO:0015267;GO:0005886;GO:0009506	cellular_component;cellular_component;molecular_function;molecular_function;cellular_component;cellular_component	CC:vacuole;CC:integral component of membrane;MF:water channel activity;MF:channel activity;CC:plasma membrane;CC:plasmodesma	K09872	PIP			COG0580	G:Carbohydrate transport and metabolism	XP_031094707.1	aquaporin PIP2-7-like [Ipomoea triloba]	sp|P93004|PIP27_ARATH	Aquaporin PIP2-7 OS=Arabidopsis thaliana OX=3702 GN=PIP2-7 PE=1 SV=2	PF00230.21	MIP	Major intrinsic protein
g36364	2.57753e-288	1.57582	0.865	0.348	4.93237e-284	GO:0005794;GO:0006644;GO:0016021;GO:0050482;GO:0016042;GO:0005576;GO:0005509;GO:0008289;GO:0102567;GO:0102568;GO:0004623	cellular_component;biological_process;cellular_component;biological_process;biological_process;cellular_component;molecular_function;molecular_function;molecular_function;molecular_function;molecular_function	CC:Golgi apparatus;BP:phospholipid metabolic process;CC:integral component of membrane;BP:arachidonic acid secretion;BP:lipid catabolic process;CC:extracellular region;MF:calcium ion binding;MF:lipid binding;MF:phospholipase A2 activity (consuming 1,2-dipalmitoylphosphatidylcholine;MF:phospholipase A2 activity consuming 1,2-dioleoylphosphatidylethanolamine;MF:phospholipase A2 activity	K01047	PLA2G, SPLA2	map00565;map00564;map00592;map00591;map00590	Ether lipid metabolism;Glycerophospholipid metabolism;alpha-Linolenic acid metabolism;Linoleic acid metabolism;Arachidonic acid metabolism	ENOG410YKKM	I:Lipid transport and metabolism	XP_031130201.1	phospholipase A2-alpha-like [Ipomoea triloba]	sp|Q8S8N6|PLA2A_ARATH	Phospholipase A2-alpha OS=Arabidopsis thaliana OX=3702 GN=PLA2-ALPHA PE=1 SV=1
g47140	0	1.57539	0.945	0.475	0	GO:0015934;GO:0005840;GO:0022625;GO:0003735;GO:0006412;GO:0009507	cellular_component;cellular_component;cellular_component;molecular_function;biological_process;cellular_component	CC:large ribosomal subunit;CC:ribosome;CC:cytosolic large ribosomal subunit;MF:structural constituent of ribosome;BP:translation;CC:chloroplast	K02916	RP-L35, MRPL35, rpmI	map03010	Ribosome	COG0291	J:Translation, ribosomal structure and biogenesis	XP_031121646.1	50S ribosomal protein L35, chloroplastic [Ipomoea triloba]	sp|P23326|RK35_SPIOL	50S ribosomal protein L35, chloroplastic OS=Spinacia oleracea OX=3562 GN=RPL35 PE=1 SV=1	PF01632.20	Ribosomal_L35p	Ribosomal protein L35
g29230	7.50623e-62	1.57412	0.291	0.101	1.43639e-57	GO:0016021	cellular_component	CC:integral component of membrane					ENOG4111I0S	S:Function unknown	XP_031109222.1	uncharacterized protein LOC116013544 [Ipomoea triloba]	sp|Q55403|Y575_SYNY3	Thylakoid membrane protein slr0575 OS=Synechocystis sp. (strain PCC 6803 / Kazusa) OX=1111708 GN=slr0575 PE=4 SV=1	PF11016.9	DUF2854	Protein of unknown function (DUF2854
g42837	0	1.5737	0.929	0.398	0	GO:0016616;GO:0016618;GO:0051287;GO:0005829;GO:0030267;GO:0008465	molecular_function;molecular_function;molecular_function;cellular_component;molecular_function;molecular_function	MF:oxidoreductase activity, acting on the CH-OH group of donors, NAD or NADP as acceptor;MF:hydroxypyruvate reductase activity;MF:NAD binding;CC:cytosol;MF:glyoxylate reductase (NADP) activity;MF:glycerate dehydrogenase activity	K15893	HPR1	map00630;map00260	Glyoxylate and dicarboxylate metabolism;Glycine, serine and threonine metabolism	COG1052	C:Energy production and conversion	XP_019166192.1	PREDICTED: glycerate dehydrogenase HPR, peroxisomal isoform X2 [Ipomoea nil]	sp|Q9C9W5|HPR1_ARATH	Glycerate dehydrogenase HPR, peroxisomal OS=Arabidopsis thaliana OX=3702 GN=HPR PE=1 SV=1	PF02826.20;PF00389.31	2-Hacid_dh_C;2-Hacid_dh	D-isomer specific 2-hydroxyacid dehydrogenase, NAD binding domain;D-isomer specific 2-hydroxyacid dehydrogenase, catalytic domain
g30417	2.28928e-133	1.57193	0.477	0.144	4.38077e-129								ENOG4111D88	O:Posttranslational modification, protein turnover, chaperones	XP_031092588.1	putative lipid-binding protein At4g00165 [Ipomoea triloba]	sp|Q8RW93|LBP65_ARATH	Putative lipid-binding protein At4g00165 OS=Arabidopsis thaliana OX=3702 GN=At4g00165 PE=2 SV=1	PF14547.7;PF14368.7;PF00234.23	Hydrophob_seed;LTP_2;Tryp_alpha_amyl	Hydrophobic seed protein;Probable lipid transfer;Protease inhibitor/seed storage/LTP family
g33458	3.88411e-132	1.57061	0.526	0.185	7.43264e-128	GO:0009570;GO:0016787;GO:0009941	cellular_component;molecular_function;cellular_component	CC:chloroplast stroma;MF:hydrolase activity;CC:chloroplast envelope					COG0637	S:Function unknown	XP_031092962.1	CBBY-like protein [Ipomoea triloba]	sp|Q94K71|CBBY_ARATH	CBBY-like protein OS=Arabidopsis thaliana OX=3702 GN=CBBY PE=1 SV=1	PF13419.7;PF00702.27;PF13242.7	HAD_2;Hydrolase;Hydrolase_like	Haloacid dehalogenase-like hydrolase;haloacid dehalogenase-like hydrolase;HAD-hyrolase-like
g33528	8.19454e-75	1.5695	0.333	0.113	1.56811e-70	GO:0003746;GO:0009507;GO:0003924;GO:0005525	molecular_function;cellular_component;molecular_function;molecular_function	MF:translation elongation factor activity;CC:chloroplast;MF:GTPase activity;MF:GTP binding	K02358	tuf, TUFM	map04626	Plant-pathogen interaction	COG0050	J:Translation, ribosomal structure and biogenesis	XP_031091793.1	elongation factor TuA, chloroplastic [Ipomoea triloba]	sp|Q40450|EFTUA_NICSY	Elongation factor TuA, chloroplastic OS=Nicotiana sylvestris OX=4096 GN=TUFA PE=2 SV=2	PF03143.18;PF00009.28;PF03144.26	GTP_EFTU_D3;GTP_EFTU;GTP_EFTU_D2	Elongation factor Tu C-terminal domain;Elongation factor Tu GTP binding domain;Elongation factor Tu domain 2
g17512	2.27034e-80	1.56695	0.361	0.125	4.34452e-76	GO:0008168	molecular_function	MF:methyltransferase activity					ENOG410XP5G	S:Function unknown	XP_031093973.1	uncharacterized protein LOC115998530 [Ipomoea triloba]			PF08241.13;PF13649.7;PF08242.13;PF13847.7;PF13489.7;PF07021.13;PF01209.19	Methyltransf_11;Methyltransf_25;Methyltransf_12;Methyltransf_31;Methyltransf_23;MetW;Ubie_methyltran	Methyltransferase domain;Methyltransferase domain;Methyltransferase domain;Methyltransferase domain;Methyltransferase domain;Methionine biosynthesis protein MetW;ubiE/COQ5 methyltransferase family
g25309	2.48451e-131	1.56588	0.523	0.18	4.75435e-127	GO:0009570;GO:0019684;GO:0009089;GO:0008839	cellular_component;biological_process;biological_process;molecular_function	CC:chloroplast stroma;BP:photosynthesis, light reaction;BP:lysine biosynthetic process via diaminopimelate;MF:4-hydroxy-tetrahydrodipicolinate reductase	K16908	CRR1			COG0289	E:Amino acid transport and metabolism	XP_031110348.1	dihydrodipicolinate reductase-like protein CRR1, chloroplastic [Ipomoea triloba]	sp|Q9FJ82|DAPB3_ARATH	Dihydrodipicolinate reductase-like protein CRR1, chloroplastic OS=Arabidopsis thaliana OX=3702 GN=DAPB3 PE=2 SV=1	PF01113.21;PF05173.15	DapB_N;DapB_C	Dihydrodipicolinate reductase, N-terminus;Dihydrodipicolinate reductase, C-terminus
g21844	1.40975e-291	1.56509	0.876	0.383	2.69769e-287	GO:0045263;GO:0015986;GO:0016021;GO:0000398;GO:0005689;GO:0015078	cellular_component;biological_process;cellular_component;biological_process;cellular_component;molecular_function	CC:proton-transporting ATP synthase complex, coupling factor F(o;BP:ATP synthesis coupled proton transport;CC:integral component of membrane;BP:mRNA splicing, via spliceosome;CC:U12-type spliceosomal complex;MF:hydrogen ion transmembrane transporter activity	K02109	ATPF0B, atpF	map00195;map00190	Photosynthesis;Oxidative phosphorylation	ENOG4112003	U:Intracellular trafficking, secretion, and vesicular transport	XP_031104274.1	ATP synthase subunit b', chloroplastic [Ipomoea triloba]	sp|P31853|ATPX_SPIOL	ATP synthase subunit b', chloroplastic OS=Spinacia oleracea OX=3562 GN=ATPG PE=1 SV=2	PF00430.19	ATP-synt_B	ATP synthase B/B' CF(0
g34449	0	1.56487	0.988	0.629	0	GO:0019898;GO:0005509;GO:0003676;GO:0045156;GO:0009767;GO:0009654;GO:0015979;GO:0009507	cellular_component;molecular_function;molecular_function;molecular_function;biological_process;cellular_component;biological_process;cellular_component	CC:extrinsic component of membrane;MF:calcium ion binding;MF:nucleic acid binding;MF:electron transporter, transferring electrons within the cyclic electron transport pathway of photosynthesis activity;BP:photosynthetic electron transport chain;CC:photosystem II oxygen evolving complex;BP:photosynthesis;CC:chloroplast	K08901	psbQ	map00195	Photosynthesis	ENOG4111SJA;ENOG41122MS	S:Function unknown;S:Function unknown	XP_031132106.1	uncharacterized protein LOC116033499 [Ipomoea triloba]	sp|P12301|PSBQ_SPIOL	Oxygen-evolving enhancer protein 3, chloroplastic OS=Spinacia oleracea OX=3562 GN=PSBQ PE=1 SV=1	PF05757.12	PsbQ	Oxygen evolving enhancer protein 3 (PsbQ
g573	1.23945e-95	1.56418	0.405	0.134	2.3718e-91	GO:0006468;GO:0004672;GO:0004675;GO:0004674;GO:0005886;GO:0005524	biological_process;molecular_function;molecular_function;molecular_function;cellular_component;molecular_function	BP:protein phosphorylation;MF:protein kinase activity;MF:transmembrane receptor protein serine/threonine kinase activity;MF:protein serine/threonine kinase activity;CC:plasma membrane;MF:ATP binding					COG0515	S:Function unknown	XP_031117698.1	receptor-like cytosolic serine/threonine-protein kinase RBK1 isoform X1 [Ipomoea triloba]	sp|Q8H1D6|RBK1_ARATH	Receptor-like cytosolic serine/threonine-protein kinase RBK1 OS=Arabidopsis thaliana OX=3702 GN=RBK1 PE=1 SV=1	PF07714.18;PF00069.26	PK_Tyr_Ser-Thr;Pkinase	Protein tyrosine and serine/threonine kinase;Protein kinase domain
g43187	3.04199e-63	1.56381	0.257	0.076	5.82116e-59										XP_031090519.1	uncharacterized protein LOC115995582 [Ipomoea triloba]
g4530	1.58287e-126	1.56299	0.516	0.183	3.02899e-122	GO:0016021	cellular_component	CC:integral component of membrane					ENOG411243X	K:Transcription	XP_019199610.1	PREDICTED: uncharacterized protein LOC109193213 [Ipomoea nil]	sp|Q96KR6|F210B_HUMAN	Protein FAM210B, mitochondrial OS=Homo sapiens OX=9606 GN=FAM210B PE=1 SV=2	PF06916.14	DUF1279	Protein of unknown function (DUF1279
g38237	1.45079e-137	1.56231	0.526	0.18	2.77623e-133	GO:0032790;GO:0003746;GO:0009507;GO:0003924;GO:0005525	biological_process;molecular_function;cellular_component;molecular_function;molecular_function	BP:ribosome disassembly;MF:translation elongation factor activity;CC:chloroplast;MF:GTPase activity;MF:GTP binding	K02355	fusA, GFM, EFG			COG0480	S:Function unknown	XP_031125687.1	elongation factor G-2, chloroplastic-like [Ipomoea triloba]	sp|P34811|EFGC1_SOYBN	Elongation factor G-1, chloroplastic OS=Glycine max OX=3847 GN=fusA1 PE=3 SV=2	PF00009.28;PF14492.7;PF03764.19;PF00679.25;PF03144.26;PF16658.6	GTP_EFTU;EFG_III;EFG_IV;EFG_C;GTP_EFTU_D2;RF3_C	Elongation factor Tu GTP binding domain;Elongation Factor G, domain III;Elongation factor G, domain IV;Elongation factor G C-terminus;Elongation factor Tu domain 2;Class II release factor RF3, C-terminal domain
g64064	0	1.56193	0.959	0.476	0	GO:0003735;GO:0006412;GO:0005840	molecular_function;biological_process;cellular_component	MF:structural constituent of ribosome;BP:translation;CC:ribosome					ENOG410Y838	S:Function unknown	XP_031119955.1	30S ribosomal protein S21, chloroplastic [Ipomoea triloba]	sp|P82024|RR21_SPIOL	30S ribosomal protein S21, chloroplastic OS=Spinacia oleracea OX=3562 GN=rps21 PE=1 SV=2	PF01165.21	Ribosomal_S21	Ribosomal protein S21
g37937	0	1.56133	0.972	0.537	0	GO:0009535;GO:0009941;GO:0009496;GO:0016021;GO:0051537;GO:0008121;GO:0010196;GO:0042742;GO:0080167;GO:0045158;GO:0005886;GO:0046872;GO:0016491	cellular_component;cellular_component;molecular_function;cellular_component;molecular_function;molecular_function;biological_process;biological_process;biological_process;molecular_function;cellular_component;molecular_function;molecular_function	CC:chloroplast thylakoid membrane;CC:chloroplast envelope;MF:plastoquinol--plastocyanin reductase activity;CC:integral component of membrane;MF:2 iron, 2 sulfur cluster binding;MF:ubiquinol-cytochrome-c reductase activity;BP:nonphotochemical quenching;BP:defense response to bacterium;BP:response to karrikin;MF:electron transporter, transferring electrons within cytochrome b6/f complex of photosys…	K02636	petC	map00195	Photosynthesis	COG0723	K:Transcription	XP_031131343.1	cytochrome b6-f complex iron-sulfur subunit 1, chloroplastic [Ipomoea triloba]	sp|P30361|UCRIA_TOBAC	Cytochrome b6-f complex iron-sulfur subunit 1, chloroplastic OS=Nicotiana tabacum OX=4097 GN=petC1 PE=2 SV=2	PF00355.27	Rieske	Rieske [2Fe-2S] domain
g54897	5.77304e-113	1.56127	0.468	0.161	1.10473e-108	GO:0016021;GO:0009507	cellular_component;cellular_component	CC:integral component of membrane;CC:chloroplast					ENOG411207M	S:Function unknown	XP_031099860.1	uncharacterized protein LOC116004061 [Ipomoea triloba]
g9047	6.98686e-65	1.55423	0.279	0.087	1.33701e-60	GO:0043231;GO:0008270;GO:0009451	cellular_component;molecular_function;biological_process	CC:intracellular membrane-bounded organelle;MF:zinc ion binding;BP:RNA modification					ENOG410Z7Z7	Q:Secondary metabolites biosynthesis, transport and catabolism	XP_019188590.1	PREDICTED: pentatricopeptide repeat-containing protein At3g24000, mitochondrial-like isoform X1 [Ipomoea nil]	sp|Q9SZT8|PP354_ARATH	Pentatricopeptide repeat-containing protein ELI1, chloroplastic OS=Arabidopsis thaliana OX=3702 GN=ELI1 PE=3 SV=1	PF13041.7;PF01535.21;PF14432.7;PF12854.8;PF13812.7;PF12070.9;PF17177.5	PPR_2;PPR;DYW_deaminase;PPR_1;PPR_3;SCAI;PPR_long	PPR repeat family;PPR repeat;DYW family of nucleic acid deaminases;PPR repeat;Pentatricopeptide repeat domain;Protein SCAI;Pentacotripeptide-repeat region of PRORP
g59775	0	1.55421	0.994	0.521	0	GO:0005829;GO:0030388;GO:0004332;GO:0006096	cellular_component;biological_process;molecular_function;biological_process	CC:cytosol;BP:fructose 1,6-bisphosphate metabolic process;MF:fructose-bisphosphate aldolase activity;BP:glycolytic process	K01623	ALDO	map00010;map00030;map00051;map00710	Glycolysis / Gluconeogenesis;Pentose phosphate pathway;Fructose and mannose metabolism;Carbon fixation in photosynthetic organisms	COG3588	G:Carbohydrate transport and metabolism	XP_031127918.1	LOW QUALITY PROTEIN: fructose-bisphosphate aldolase 1, chloroplastic-like [Ipomoea triloba]	sp|Q944G9|ALFP2_ARATH	Fructose-bisphosphate aldolase 2, chloroplastic OS=Arabidopsis thaliana OX=3702 GN=FBA2 PE=1 SV=2	PF00274.20	Glycolytic	Fructose-bisphosphate aldolase class-I
g31397	0	1.55392	0.998	0.811	0	GO:0015979;GO:0009538	biological_process;cellular_component	BP:photosynthesis;CC:photosystem I reaction center	K02695	psaH	map00195	Photosynthesis	ENOG4112D30	S:Function unknown	XP_019198675.1	PREDICTED: photosystem I reaction center subunit VI, chloroplastic [Ipomoea nil]	sp|P22179|PSAH_SPIOL	Photosystem I reaction center subunit VI, chloroplastic OS=Spinacia oleracea OX=3562 GN=PSAH PE=1 SV=1	PF03244.15	PSI_PsaH	Photosystem I reaction centre subunit VI
g9821	5.60008e-167	1.55131	0.607	0.212	1.07163e-162	GO:2000123	biological_process	BP:positive regulation of stomatal complex development					ENOG410Z51E	S:Function unknown	XP_031101088.1	uncharacterized protein LOC116005012 [Ipomoea triloba]	sp|Q9SV72|EPFL9_ARATH	EPIDERMAL PATTERNING FACTOR-like protein 9 OS=Arabidopsis thaliana OX=3702 GN=EPFL9 PE=1 SV=1
g59328	0	1.55074	0.915	0.432	0	GO:0009535;GO:0045261;GO:0015986;GO:0046933;GO:0000275;GO:0006754	cellular_component;cellular_component;biological_process;molecular_function;cellular_component;biological_process	CC:chloroplast thylakoid membrane;CC:proton-transporting ATP synthase complex, catalytic core F(1;BP:ATP synthesis coupled proton transport;MF:proton-transporting ATP synthase activity, rotational mechanism;CC:mitochondrial proton-transporting ATP synthase complex, catalytic core F(1;BP:ATP biosynthetic process	K02115	ATPF1G, atpG	map00195;map00190	Photosynthesis;Oxidative phosphorylation	ENOG410XTBX;COG0224	S:Function unknown;C:Energy production and conversion	XP_031127959.1	ATP synthase gamma chain, chloroplastic [Ipomoea triloba]	sp|P29790|ATPG_TOBAC	ATP synthase gamma chain, chloroplastic OS=Nicotiana tabacum OX=4097 GN=ATPC PE=1 SV=1	PF00231.20	ATP-synt	ATP synthase
g61812	1.25374e-205	1.5503	0.731	0.275	2.39916e-201	GO:0016021;GO:0016192	cellular_component;biological_process	CC:integral component of membrane;BP:vesicle-mediated transport					ENOG41116U9	S:Function unknown	XP_019177051.1	PREDICTED: pEARLI1-like lipid transfer protein 2 [Ipomoea nil]	sp|Q39176|ERLI1_ARATH	Lipid transfer protein EARLI 1 OS=Arabidopsis thaliana OX=3702 GN=EARLI1 PE=1 SV=1	PF14547.7;PF00234.23;PF14368.7	Hydrophob_seed;Tryp_alpha_amyl;LTP_2	Hydrophobic seed protein;Protease inhibitor/seed storage/LTP family;Probable lipid transfer
g17905	4.68785e-225	1.5477	0.802	0.385	8.97067e-221	GO:0009535;GO:0032055;GO:0016021	cellular_component;biological_process;cellular_component	CC:chloroplast thylakoid membrane;BP:negative regulation of translation in response to stress;CC:integral component of membrane					ENOG4111VYF	S:Function unknown	XP_031093904.1	uncharacterized protein LOC115998461 [Ipomoea triloba]			PF00684.20	DnaJ_CXXCXGXG	DnaJ central domain
g12656	1.05202e-114	1.5474	0.499	0.184	2.01314e-110	GO:0005576;GO:0005615	cellular_component;cellular_component	CC:extracellular region;CC:extracellular space					COG2340	S:Function unknown	XP_031101000.1	pathogenesis-related protein PR-1-like [Ipomoea triloba]	sp|Q40374|PR1_MEDTR	Pathogenesis-related protein PR-1 OS=Medicago truncatula OX=3880 GN=PR-1 PE=2 SV=1	PF00188.27	CAP	Cysteine-rich secretory protein family
g2456	2.33879e-277	1.54676	0.868	0.37	4.4755e-273	GO:0003735;GO:0015934;GO:0006412	molecular_function;cellular_component;biological_process	MF:structural constituent of ribosome;CC:large ribosomal subunit;BP:translation	K02876	RP-L15, MRPL15, rplO	map03010	Ribosome	COG0200	S:Function unknown	XP_031114508.1	50S ribosomal protein L15, chloroplastic [Ipomoea triloba]	sp|P22798|RK15_SPIOL	50S ribosomal protein L15, chloroplastic OS=Spinacia oleracea OX=3562 GN=RPL15 PE=1 SV=3	PF00828.20	Ribosomal_L27A	Ribosomal proteins 50S-L15, 50S-L18e, 60S-L27A
g46802	4.33448e-224	1.54655	0.769	0.298	8.29446e-220	GO:0042626;GO:0016021;GO:0016020;GO:0016887;GO:0005886;GO:0055085;GO:0005524	molecular_function;cellular_component;cellular_component;molecular_function;cellular_component;biological_process;molecular_function	MF:ATPase activity, coupled to transmembrane movement of substances;CC:integral component of membrane;CC:membrane;MF:ATPase activity;CC:plasma membrane;BP:transmembrane transport;MF:ATP binding					COG1131;ENOG410Y9KK	E:Amino acid transport and metabolism;S:Function unknown	XP_031093769.1	ABC transporter G family member 10-like [Ipomoea triloba]	sp|Q9MAH4|AB10G_ARATH	ABC transporter G family member 10 OS=Arabidopsis thaliana OX=3702 GN=ABCG10 PE=3 SV=1	PF01061.25;PF08241.13;PF13649.7;PF00005.28;PF08242.13;PF01209.19;PF13489.7;PF13847.7;PF05175.15	ABC2_membrane;Methyltransf_11;Methyltransf_25;ABC_tran;Methyltransf_12;Ubie_methyltran;Methyltransf_23;Methyltransf_31;MTS	ABC-2 type transporter;Methyltransferase domain;Methyltransferase domain;ABC transporter;Methyltransferase domain;ubiE/COQ5 methyltransferase family;Methyltransferase domain;Methyltransferase domain;Methyltransferase small domain
g19479	0	1.54484	0.919	0.442	0	GO:0070181;GO:0005840;GO:0019843;GO:0003735;GO:0003746;GO:0006412;GO:0022627	molecular_function;cellular_component;molecular_function;molecular_function;molecular_function;biological_process;cellular_component	MF:small ribosomal subunit rRNA binding;CC:ribosome;MF:rRNA binding;MF:structural constituent of ribosome;MF:translation elongation factor activity;BP:translation;CC:cytosolic small ribosomal subunit	K02990	RP-S6, MRPS6, rpsF	map03010	Ribosome	ENOG4111S82	S:Function unknown	XP_031095640.1	30S ribosomal protein S6 alpha, chloroplastic-like [Ipomoea triloba]	sp|P82403|RR6_SPIOL	30S ribosomal protein S6 alpha, chloroplastic OS=Spinacia oleracea OX=3562 GN=RPS6 PE=1 SV=3	PF01250.18	Ribosomal_S6	Ribosomal protein S6
g4086	3.87236e-138	1.54242	0.524	0.177	7.41015e-134	GO:0005737;GO:0008080	cellular_component;molecular_function	CC:cytoplasm;MF:N-acetyltransferase activity					ENOG4111M9W	S:Function unknown	XP_031114685.1	uncharacterized protein LOC116018820 [Ipomoea triloba]			PF00583.26;PF13508.8;PF13673.8	Acetyltransf_1;Acetyltransf_7;Acetyltransf_10	Acetyltransferase (GNAT) family;Acetyltransferase (GNAT) domain;Acetyltransferase (GNAT) domain
g16925	0	1.5416	0.964	0.457	0	GO:0046872;GO:0042744;GO:0006979;GO:0020037;GO:0004096	molecular_function;biological_process;biological_process;molecular_function;molecular_function	MF:metal ion binding;BP:hydrogen peroxide catabolic process;BP:response to oxidative stress;MF:heme binding;MF:catalase activity	K03781	katE, CAT, catB, srpA	map00630;map04016;map00380;map04146	Glyoxylate and dicarboxylate metabolism;MAPK signaling pathway - plant;Tryptophan metabolism;Peroxisome	COG0753	T:Signal transduction mechanisms	XP_031094084.1	catalase isozyme 1 [Ipomoea triloba]	sp|P17598|CATA1_GOSHI	Catalase isozyme 1 OS=Gossypium hirsutum OX=3635 GN=CAT1 PE=2 SV=2	PF00199.20;PF06628.13	Catalase;Catalase-rel	Catalase;Catalase-related immune-responsive
g20248	5.84071e-186	1.54129	0.654	0.227	1.11768e-181	GO:0009535;GO:0019898;GO:0009654;GO:0005509;GO:0015979	cellular_component;cellular_component;cellular_component;molecular_function;biological_process	CC:chloroplast thylakoid membrane;CC:extrinsic component of membrane;CC:photosystem II oxygen evolving complex;MF:calcium ion binding;BP:photosynthesis					ENOG410Y9BC	S:Function unknown	XP_031095936.1	photosynthetic NDH subunit of lumenal location 1, chloroplastic isoform X1 [Ipomoea triloba]	sp|O80634|PNSL1_ARATH	Photosynthetic NDH subunit of lumenal location 1, chloroplastic OS=Arabidopsis thaliana OX=3702 GN=PNSL1 PE=1 SV=2	PF01789.17	PsbP	PsbP
g26136	5.56464e-232	1.54071	0.76	0.287	1.06485e-227	GO:0101031;GO:0009570;GO:0044183;GO:1905538;GO:0061077;GO:0110102	cellular_component;cellular_component;molecular_function;molecular_function;biological_process;biological_process	CC:chaperone complex;CC:chloroplast stroma;MF:protein binding involved in protein folding;MF:polysome binding;BP:chaperone-mediated protein folding;BP:chloroplast ribulose bisphosphate carboxylase complex assembly					ENOG410YQQQ	S:Function unknown	XP_031107732.1	protein BUNDLE SHEATH DEFECTIVE 2, chloroplastic [Ipomoea triloba]	sp|Q9SN73|BSD2_ARATH	Protein BUNDLE SHEATH DEFECTIVE 2, chloroplastic OS=Arabidopsis thaliana OX=3702 GN=BSD2 PE=1 SV=1	PF00684.20	DnaJ_CXXCXGXG	DnaJ central domain
g1605	1.08818e-71	1.53982	0.329	0.114	2.08234e-67	GO:0009534;GO:0016021;GO:0009507	cellular_component;cellular_component;cellular_component	CC:chloroplast thylakoid;CC:integral component of membrane;CC:chloroplast					ENOG410YS92	S:Function unknown	XP_031115248.1	protein LOW PSII ACCUMULATION 2, chloroplastic [Ipomoea triloba]	sp|F4KDA6|LPA2_ARATH	Protein LOW PSII ACCUMULATION 2, chloroplastic OS=Arabidopsis thaliana OX=3702 GN=LPA2 PE=1 SV=1
g41625	3.31777e-268	1.53893	0.848	0.367	6.34888e-264	GO:0005840;GO:0009570;GO:0003735;GO:0003676;GO:0006412;GO:0003729	cellular_component;cellular_component;molecular_function;molecular_function;biological_process;molecular_function	CC:ribosome;CC:chloroplast stroma;MF:structural constituent of ribosome;MF:nucleic acid binding;BP:translation;MF:mRNA binding	K02945	RP-S1, rpsA	map03010	Ribosome	COG0539	L:Replication, recombination and repair	XP_031112241.1	30S ribosomal protein S1, chloroplastic-like [Ipomoea triloba]	sp|P29344|RR1_SPIOL	30S ribosomal protein S1, chloroplastic OS=Spinacia oleracea OX=3562 GN=RPS1 PE=1 SV=1	PF00575.24	S1	S1 RNA binding domain
g31548	4.35939e-73	1.53642	0.334	0.117	8.34213e-69								COG0859	M:Cell wall/membrane/envelope biogenesis	XP_031090529.1	photosynthetic NDH subunit of subcomplex B 1, chloroplastic [Ipomoea triloba]	sp|Q9S9N6|PNSB1_ARATH	Photosynthetic NDH subunit of subcomplex B 1, chloroplastic OS=Arabidopsis thaliana OX=3702 GN=PNSB1 PE=2 SV=1
g60170	3.69697e-95	1.53437	0.39	0.128	7.07453e-91	GO:0009535	cellular_component	CC:chloroplast thylakoid membrane					ENOG4112CEJ;ENOG4111TTD	S:Function unknown;S:Function unknown	XP_031119728.1	light-harvesting complex-like protein OHP2, chloroplastic [Ipomoea triloba]	sp|Q9FEC1|OHP2_ARATH	Light-harvesting complex-like protein OHP2, chloroplastic OS=Arabidopsis thaliana OX=3702 GN=OHP2 PE=2 SV=1
g9347	0	1.53279	0.947	0.493	0	GO:0009941;GO:0022626;GO:0005840;GO:0009570;GO:0003735;GO:0006412	cellular_component;cellular_component;cellular_component;cellular_component;molecular_function;biological_process	CC:chloroplast envelope;CC:cytosolic ribosome;CC:ribosome;CC:chloroplast stroma;MF:structural constituent of ribosome;BP:translation	K02931	RP-L5, MRPL5, rplE	map03010	Ribosome	COG0094	S:Function unknown	XP_031111258.1	50S ribosomal protein L5, chloroplastic [Ipomoea triloba]	sp|O04603|RK5_ARATH	50S ribosomal protein L5, chloroplastic OS=Arabidopsis thaliana OX=3702 GN=RPL5 PE=2 SV=1	PF00281.20;PF00673.22	Ribosomal_L5;Ribosomal_L5_C	Ribosomal protein L5;ribosomal L5P family C-terminus
g13324	2.11092e-237	1.52883	0.796	0.305	4.03946e-233	GO:0005347;GO:0043169;GO:0005978;GO:0016021;GO:0008878;GO:0009507;GO:0005524;GO:0019252	molecular_function;molecular_function;biological_process;cellular_component;molecular_function;cellular_component;molecular_function;biological_process	MF:ATP transmembrane transporter activity;MF:cation binding;BP:glycogen biosynthetic process;CC:integral component of membrane;MF:glucose-1-phosphate adenylyltransferase activity;CC:chloroplast;MF:ATP binding;BP:starch biosynthetic process	K00975	glgC	map00520;map00500	Amino sugar and nucleotide sugar metabolism;Starch and sucrose metabolism	COG0448	H:Coenzyme transport and metabolism	THF97089.1	hypothetical protein TEA_001900 [Camellia sinensis var. sinensis]	sp|P55243|GLGL3_SOLTU	Glucose-1-phosphate adenylyltransferase large subunit 3, chloroplastic/amyloplastic OS=Solanum tuberosum OX=4113 GN=AGPS3 PE=2 SV=1	PF00483.24;PF00153.28	NTP_transferase;Mito_carr	Nucleotidyl transferase;Mitochondrial carrier protein
g9963	8.30738e-267	1.52763	0.828	0.331	1.5897e-262	GO:0016021	cellular_component	CC:integral component of membrane							AFK36083.1	unknown [Lotus japonicus]			PF11493.9	TSP9	Thylakoid soluble phosphoprotein TSP9
g13264	3.1446e-60	1.52736	0.276	0.091	6.0175e-56	GO:0003885;GO:0016020;GO:0071949;GO:0050105	molecular_function;cellular_component;molecular_function;molecular_function	MF:D-arabinono-1,4-lactone oxidase activity;CC:membrane;MF:FAD binding;MF:L-gulonolactone oxidase activity	K00103	GULO	map00053	Ascorbate and aldarate metabolism	COG0277	C:Energy production and conversion	XP_031097815.1	probable L-gulonolactone oxidase 4 [Ipomoea triloba]	sp|O81032|GGLO6_ARATH	Probable L-gulonolactone oxidase 6 OS=Arabidopsis thaliana OX=3702 GN=GULLO6 PE=3 SV=1	PF01565.24;PF04030.15	FAD_binding_4;ALO	FAD binding domain;D-arabinono-1,4-lactone oxidase
g54340	0	1.5273	0.994	0.522	0	GO:0019516;GO:0005777;GO:0052854;GO:0008891;GO:0052853;GO:0052852;GO:0010181;GO:0004459;GO:0016491	biological_process;cellular_component;molecular_function;molecular_function;molecular_function;molecular_function;molecular_function;molecular_function;molecular_function	BP:lactate oxidation;CC:peroxisome;MF:medium-chain-(S)-2-hydroxy-acid oxidase activity;MF:glycolate oxidase activity;MF:long-chain-(S)-2-hydroxy-long-chain-acid oxidase activity;MF:very-long-chain-(S)-2-hydroxy-acid oxidase activity;MF:FMN binding;MF:L-lactate dehydrogenase activity;MF:oxidoreductase activity	K11517	HAO	map00630;map04146	Glyoxylate and dicarboxylate metabolism;Peroxisome	COG1304	S:Function unknown	XP_031106382.1	peroxisomal (S)-2-hydroxy-acid oxidase-like [Ipomoea triloba]	sp|Q9LRR9|GLO1_ARATH	(S)-2-hydroxy-acid oxidase GLO1 OS=Arabidopsis thaliana OX=3702 GN=GLO1 PE=1 SV=1	PF01070.19;PF00478.26;PF03060.16	FMN_dh;IMPDH;NMO	FMN-dependent dehydrogenase;IMP dehydrogenase / GMP reductase domain;Nitronate monooxygenase
g61043	5.0236e-113	1.52589	0.478	0.171	9.61317e-109	GO:0016853	molecular_function	MF:isomerase activity					ENOG4111CMQ;ENOG4111ARE	S:Function unknown;U:Intracellular trafficking, secretion, and vesicular transport	XP_031120682.1	uncharacterized protein LOC116023804 [Ipomoea triloba]
g38044	0	1.52325	0.993	0.741	0	GO:0009535;GO:0005507;GO:0009055	cellular_component;molecular_function;molecular_function	CC:chloroplast thylakoid membrane;MF:copper ion binding;MF:electron carrier activity	K02638	petE	map00195	Photosynthesis	COG3794	C:Energy production and conversion	XP_031131131.1	plastocyanin-like [Ipomoea triloba]	sp|P00289|PLAS_SPIOL	Plastocyanin, chloroplastic OS=Spinacia oleracea OX=3562 GN=PETE PE=1 SV=2	PF00127.21;PF13473.7	Copper-bind;Cupredoxin_1	Copper binding proteins, plastocyanin/azurin family;Cupredoxin-like domain
g20570	8.03948e-67	1.52243	0.306	0.103	1.53843e-62	GO:0016853;GO:0009966;GO:1901135;GO:0097367;GO:0004864;GO:0016021	molecular_function;biological_process;biological_process;molecular_function;molecular_function;cellular_component	MF:isomerase activity;BP:regulation of signal transduction;BP:carbohydrate derivative metabolic process;MF:carbohydrate derivative binding;MF:protein phosphatase inhibitor activity;CC:integral component of membrane					COG0794	S:Function unknown	XP_031093678.1	uncharacterized protein LOC115998287 [Ipomoea triloba]	sp|Q9LBW5|PHI_MYCGS	3-hexulose-6-phosphate isomerase OS=Mycobacterium gastri OX=1777 GN=rmpB PE=2 SV=1	PF04979.15	IPP-2	Protein phosphatase inhibitor 2 (IPP-2
g50511	2.68707e-168	1.51966	0.633	0.233	5.14197e-164	GO:0009941;GO:0009534	cellular_component;cellular_component	CC:chloroplast envelope;CC:chloroplast thylakoid					ENOG4111RV1	S:Function unknown	XP_031123085.1	protein HHL1, chloroplastic [Ipomoea triloba]	sp|Q8LDL0|HHL1_ARATH	Protein HHL1, chloroplastic OS=Arabidopsis thaliana OX=3702 GN=HHL1 PE=1 SV=1
g43774	0	1.51957	0.949	0.493	0	GO:0016021;GO:0015979;GO:0009523	cellular_component;biological_process;cellular_component	CC:integral component of membrane;BP:photosynthesis;CC:photosystem II	K22048	MSL4S			ENOG410YXEC	S:Function unknown	XP_031116082.1	uncharacterized protein LOC116019861 [Ipomoea triloba]			PF06596.12	PsbX	Photosystem II reaction centre X protein (PsbX
g13403	9.34907e-177	1.51942	0.691	0.283	1.78904e-172	GO:0005829;GO:0043022;GO:0003743	cellular_component;molecular_function;molecular_function	CC:cytosol;MF:ribosome binding;MF:translation initiation factor activity	K02518	infA			COG0361	J:Translation, ribosomal structure and biogenesis	XP_031098575.1	uncharacterized protein LOC116002545 [Ipomoea triloba]	sp|Q94KR9|IF1C_SOLLC	Translation initiation factor IF-1, chloroplastic OS=Solanum lycopersicum OX=4081 GN=infA PE=2 SV=1	PF01176.20	eIF-1a	Translation initiation factor 1A / IF-1
g603	1.08269e-81	1.51927	0.388	0.143	2.07183e-77	GO:0061929;GO:0016740;GO:0005829	molecular_function;molecular_function;cellular_component	MF:gamma-glutamylaminecyclotransferase activity;MF:transferase activity;CC:cytosol	K19761	GGACT			ENOG4111N8W	S:Function unknown	XP_031116369.1	putative gamma-glutamylcyclotransferase At3g02910 [Ipomoea triloba]	sp|Q9M8T3|Y2910_ARATH	Putative gamma-glutamylcyclotransferase At3g02910 OS=Arabidopsis thaliana OX=3702 GN=At3g02910 PE=2 SV=2	PF06094.13	GGACT	Gamma-glutamyl cyclotransferase, AIG2-like
g49009	3.15643e-251	1.51624	0.805	0.319	6.04015e-247	GO:0016021;GO:0015979;GO:0009538	cellular_component;biological_process;cellular_component	CC:integral component of membrane;BP:photosynthesis;CC:photosystem I reaction center	K02699	psaL	map00195	Photosynthesis	ENOG4111KFU	C:Energy production and conversion	XP_031123356.1	photosystem I reaction center subunit XI, chloroplastic [Ipomoea triloba]	sp|Q9SUI4|PSAL_ARATH	Photosystem I reaction center subunit XI, chloroplastic OS=Arabidopsis thaliana OX=3702 GN=PSAL PE=1 SV=2	PF02605.16	PsaL	Photosystem I reaction centre subunit XI
g42876	0	1.51408	0.997	0.751	0	GO:0046872;GO:0048529;GO:0015995;GO:0015979	molecular_function;molecular_function;biological_process;biological_process	MF:metal ion binding;MF:magnesium-protoporphyrin IX monomethyl ester (oxidative) cyclase activity;BP:chlorophyll biosynthetic process;BP:photosynthesis	K04035	E1.14.13.81, acsF, chlE	map00860	Porphyrin and chlorophyll metabolism	ENOG410XPVQ	H:Coenzyme transport and metabolism	XP_031097031.1	magnesium-protoporphyrin IX monomethyl ester [oxidative] cyclase, chloroplastic [Ipomoea triloba]	sp|Q6SJV8|CRD1_GOSHI	Magnesium-protoporphyrin IX monomethyl ester [oxidative] cyclase, chloroplastic OS=Gossypium hirsutum OX=3635 GN=CRD1 PE=2 SV=2	PF02915.18	Rubrerythrin	Rubrerythrin
g24342	1.58817e-75	1.51334	0.319	0.101	3.03913e-71	GO:0005089	molecular_function	MF:Rho guanyl-nucleotide exchange factor activity					ENOG4110DIX	S:Function unknown	XP_031104204.1	rop guanine nucleotide exchange factor 7-like [Ipomoea triloba]	sp|Q9LZN0|ROGF7_ARATH	Rop guanine nucleotide exchange factor 7 OS=Arabidopsis thaliana OX=3702 GN=ROPGEF7 PE=1 SV=1	PF03759.14	PRONE	PRONE (Plant-specific Rop nucleotide exchanger
g16805	2.89207e-154	1.51329	0.6	0.224	5.53427e-150	GO:0045174;GO:0016740	molecular_function;molecular_function	MF:glutathione dehydrogenase (ascorbate) activity;MF:transferase activity	K21888	DHAR	map00480;map00053	Glutathione metabolism;Ascorbate and aldarate metabolism	ENOG410ZRK6	U:Intracellular trafficking, secretion, and vesicular transport	XP_031095852.1	glutathione S-transferase DHAR3, chloroplastic [Ipomoea triloba]	sp|Q67UK9|DHAR2_ORYSJ	Probable glutathione S-transferase DHAR2, chloroplastic OS=Oryza sativa subsp. japonica OX=39947 GN=DHAR2 PE=2 SV=1	PF13417.7;PF13409.7;PF02798.21;PF13410.7;PF17172.5	GST_N_3;GST_N_2;GST_N;GST_C_2;GST_N_4	Glutathione S-transferase, N-terminal domain;Glutathione S-transferase, N-terminal domain;Glutathione S-transferase, N-terminal domain;Glutathione S-transferase, C-terminal domain;Glutathione S-transferase N-terminal domain
g59093	0	1.51301	0.983	0.54	0	GO:0016773;GO:0015074;GO:0008270;GO:0003676;GO:0016758	molecular_function;biological_process;molecular_function;molecular_function;molecular_function	MF:phosphotransferase activity, alcohol group as acceptor;BP:DNA integration;MF:zinc ion binding;MF:nucleic acid binding;MF:transferase activity, transferring hexosyl groups					COG2801	L:Replication, recombination and repair	XP_019161203.1	PREDICTED: uncharacterized protein LOC109157818 [Ipomoea nil]	sp|Q94HW2|POLR1_ARATH	Retrovirus-related Pol polyprotein from transposon RE1 OS=Arabidopsis thaliana OX=3702 GN=RE1 PE=2 SV=1	PF07727.15;PF13976.7;PF00468.18;PF14244.7	RVT_2;gag_pre-integrs;Ribosomal_L34;Retrotran_gag_3	Reverse transcriptase (RNA-dependent DNA polymerase;GAG-pre-integrase domain;Ribosomal protein L34;gag-polypeptide of LTR copia-type
g35362	0	1.51267	0.929	0.436	0	GO:0009535;GO:0097753;GO:0090391;GO:0009941;GO:0016021;GO:0009515;GO:0009579;GO:0010287	cellular_component;biological_process;biological_process;cellular_component;cellular_component;cellular_component;cellular_component;cellular_component	CC:chloroplast thylakoid membrane;BP:membrane bending;BP:granum assembly;CC:chloroplast envelope;CC:integral component of membrane;CC:granal stacked thylakoid;CC:thylakoid;CC:plastoglobule					ENOG4111YWG	S:Function unknown	XP_031128449.1	protein CURVATURE THYLAKOID 1A, chloroplastic-like [Ipomoea triloba]	sp|O04616|CUT1A_ARATH	Protein CURVATURE THYLAKOID 1A, chloroplastic OS=Arabidopsis thaliana OX=3702 GN=CURT1A PE=1 SV=1	PF14159.7	CAAD	CAAD domains of cyanobacterial aminoacyl-tRNA synthetase
g44735	0	1.51245	0.951	0.43	0	GO:0009535;GO:0009941;GO:0022626;GO:0004356;GO:0009570;GO:0005739;GO:0006542;GO:0048046;GO:0046686;GO:0005524	cellular_component;cellular_component;cellular_component;molecular_function;cellular_component;cellular_component;biological_process;cellular_component;biological_process;molecular_function	CC:chloroplast thylakoid membrane;CC:chloroplast envelope;CC:cytosolic ribosome;MF:glutamate-ammonia ligase activity;CC:chloroplast stroma;CC:mitochondrion;BP:glutamine biosynthetic process;CC:apoplast;BP:response to cadmium ion;MF:ATP binding	K01915	glnA, GLUL	map00630;map00220;map00250;map00910	Glyoxylate and dicarboxylate metabolism;Arginine biosynthesis;Alanine, aspartate and glutamate metabolism;Nitrogen metabolism	COG0174	L:Replication, recombination and repair	XP_031121710.1	glutamine synthetase leaf isozyme, chloroplastic [Ipomoea triloba]	sp|P15102|GLNA4_PHAVU	Glutamine synthetase leaf isozyme, chloroplastic OS=Phaseolus vulgaris OX=3885 PE=2 SV=1	PF00120.25;PF03951.20	Gln-synt_C;Gln-synt_N	Glutamine synthetase, catalytic domain;Glutamine synthetase, beta-Grasp domain
g25506	9.26217e-265	1.51023	0.871	0.385	1.77241e-260	GO:0031969;GO:0016717;GO:0016021;GO:0006636;GO:0006629	cellular_component;molecular_function;cellular_component;biological_process;biological_process	CC:chloroplast membrane;MF:oxidoreductase activity, acting on paired donors, with oxidation of a pair of donors resulting in the reduction of molecular oxygen to two molecules of water;CC:integral component of membrane;BP:unsaturated fatty acid biosynthetic process;BP:lipid metabolic process	K10257	FAD3, FAD7, FAD8, desB			COG3239	S:Function unknown	XP_031108882.1	omega-3 fatty acid desaturase, chloroplastic-like [Ipomoea triloba]	sp|P48620|FAD3C_SESIN	Omega-3 fatty acid desaturase, chloroplastic OS=Sesamum indicum OX=4182 GN=FAD7 PE=2 SV=1	PF11960.9;PF00487.25	DUF3474;FA_desaturase	Domain of unknown function (DUF3474;Fatty acid desaturase
g15362	1.15751e-74	1.50983	0.316	0.101	2.21502e-70								ENOG4111Q7E	U:Intracellular trafficking, secretion, and vesicular transport	XP_031104656.1	protein LHCP TRANSLOCATION DEFECT [Ipomoea triloba]	sp|Q8VY88|LTD_ARATH	Protein LHCP TRANSLOCATION DEFECT OS=Arabidopsis thaliana OX=3702 GN=LTD PE=1 SV=1
g46227	9.66766e-257	1.50964	0.833	0.353	1.85e-252	GO:0015995;GO:0006486;GO:0016851;GO:0009570;GO:0016020;GO:0015979;GO:0005524;GO:0009507	biological_process;biological_process;molecular_function;cellular_component;cellular_component;biological_process;molecular_function;cellular_component	BP:chlorophyll biosynthetic process;BP:protein glycosylation;MF:magnesium chelatase activity;CC:chloroplast stroma;CC:membrane;BP:photosynthesis;MF:ATP binding;CC:chloroplast	K03405	chlI, bchI	map00860	Porphyrin and chlorophyll metabolism	COG1239	H:Coenzyme transport and metabolism	XP_019175918.1	PREDICTED: magnesium-chelatase subunit ChlI, chloroplastic [Ipomoea nil]	sp|O22436|CHLI_TOBAC	Magnesium-chelatase subunit ChlI, chloroplastic OS=Nicotiana tabacum OX=4097 GN=CHLI PE=2 SV=1	PF01078.22;PF00493.24;PF07728.15;PF13401.7;PF13191.7	Mg_chelatase;MCM;AAA_5;AAA_22;AAA_16	Magnesium chelatase, subunit ChlI;MCM P-loop domain;AAA domain (dynein-related subfamily;AAA domain;AAA ATPase domain
g13818	2.57576e-71	1.50952	0.317	0.104	4.92897e-67	GO:0015996;GO:0047746;GO:0030880;GO:0006352;GO:0000166	biological_process;molecular_function;cellular_component;biological_process;molecular_function	BP:chlorophyll catabolic process;MF:chlorophyllase activity;CC:RNA polymerase complex;BP:DNA-templated transcription, initiation;MF:nucleotide binding	BP:chlorophyll catabolic process;MF:chlorophyllase activity;CC:RNA polymerase complex;BP:DNA-templated transcription, initiation;MF:nucleotide binding	E3.1.1.14	map00860	Porphyrin and chlorophyll metabolism	ENOG4111H5Z	S:Function unknown	XP_031097424.1	chlorophyllase-2, chloroplastic [Ipomoea triloba]	sp|Q9M7I7|CLH2_ARATH	Chlorophyllase-2, chloroplastic OS=Arabidopsis thaliana OX=3702 GN=CLH2 PE=1 SV=1	PF07224.12;PF12740.8;PF03403.14;PF12697.8	Chlorophyllase;Chlorophyllase2;PAF-AH_p_II;Abhydrolase_6	Chlorophyllase;Chlorophyllase enzyme;Platelet-activating factor acetylhydrolase, isoform II;Alpha/beta hydrolase family
g35073	1.96862e-136	1.50927	0.532	0.183	3.76715e-132	GO:0009507	cellular_component	CC:chloroplast					ENOG410XZGC	S:Function unknown	XP_031131311.1	uncharacterized protein LOC116032744 [Ipomoea triloba]
g20358	0	1.50835	0.978	0.541	0	GO:0032544;GO:0009536;GO:0005840	biological_process;cellular_component;cellular_component	BP:plastid translation;CC:plastid;CC:ribosome	K19033	PSRP4, RPS31			ENOG410XX58	S:Function unknown	XP_031095571.1	30S ribosomal protein S31, chloroplastic [Ipomoea triloba]	sp|P47910|RR31_SPIOL	30S ribosomal protein S31, chloroplastic OS=Spinacia oleracea OX=3562 GN=RPS31 PE=1 SV=2	PF17067.6	RPS31	Ribosomal protein S31e
g20723	9.30781e-246	1.50823	0.843	0.383	1.78114e-241	GO:0005506;GO:0016021	molecular_function;cellular_component	MF:iron ion binding;CC:integral component of membrane					ENOG4110MKE	S:Function unknown	XP_031093219.1	uncharacterized protein LOC115997936 [Ipomoea triloba]			PF00595.25;PF13180.7;PF17820.2	PDZ;PDZ_2;PDZ_6	PDZ domain;PDZ domain;PDZ domain
g17947	0	1.50804	0.993	0.609	0	GO:0009579;GO:0046863;GO:0005524;GO:0009570	cellular_component;molecular_function;molecular_function;cellular_component	CC:thylakoid;MF:ribulose-1,5-bisphosphate carboxylase/oxygenase activator activity;MF:ATP binding;CC:chloroplast stroma					COG1222	O:Posttranslational modification, protein turnover, chaperones	AFU50380.1	chloroplast ribulose bisphosphate carboxylase/oxygenase activase large isoform [Ipomoea batatas]	sp|Q7X9A0|RCA1_LARTR	Ribulose bisphosphate carboxylase/oxygenase activase 1, chloroplastic OS=Larrea tridentata OX=66636 GN=RCA1 PE=1 SV=1	PF00004.30;PF06309.12	AAA;Torsin	ATPase family associated with various cellular activities (AAA;Torsin
g25257	6.16874e-295	1.50731	0.914	0.433	1.18045e-290	GO:0005737;GO:0009570;GO:0047134;GO:0005623;GO:0016671;GO:0008047;GO:0045454;GO:0015035;GO:0006662	cellular_component;cellular_component;molecular_function;cellular_component;molecular_function;molecular_function;biological_process;molecular_function;biological_process	CC:cytoplasm;CC:chloroplast stroma;MF:protein-disulfide reductase activity;CC:cell;MF:oxidoreductase activity, acting on a sulfur group of donors, disulfide as acceptor;MF:enzyme activator activity;BP:cell redox homeostasis;MF:protein disulfide oxidoreductase activity;BP:glycerol ether metabolic process					COG0526	K:Transcription	XP_031103079.1	thioredoxin X, chloroplastic [Ipomoea triloba]	sp|Q8LD49|TRXX_ARATH	Thioredoxin X, chloroplastic OS=Arabidopsis thaliana OX=3702 GN=ATHX PE=2 SV=2	PF00085.21;PF13098.7;PF13899.7;PF00578.22;PF13905.7;PF14595.7	Thioredoxin;Thioredoxin_2;Thioredoxin_7;AhpC-TSA;Thioredoxin_8;Thioredoxin_9	Thioredoxin;Thioredoxin-like domain;Thioredoxin-like;AhpC/TSA family;Thioredoxin-like;Thioredoxin
g21739	3.96146e-292	1.50151	0.877	0.378	7.58065e-288	GO:0045263;GO:0015986;GO:0016021;GO:0000398;GO:0005689;GO:0015078	cellular_component;biological_process;cellular_component;biological_process;cellular_component;molecular_function	CC:proton-transporting ATP synthase complex, coupling factor F(o;BP:ATP synthesis coupled proton transport;CC:integral component of membrane;BP:mRNA splicing, via spliceosome;CC:U12-type spliceosomal complex;MF:hydrogen ion transmembrane transporter activity	K02109	ATPF0B, atpF	map00195;map00190	Photosynthesis;Oxidative phosphorylation	ENOG4112003	U:Intracellular trafficking, secretion, and vesicular transport	XP_031104274.1	ATP synthase subunit b', chloroplastic [Ipomoea triloba]	sp|P31853|ATPX_SPIOL	ATP synthase subunit b', chloroplastic OS=Spinacia oleracea OX=3562 GN=ATPG PE=1 SV=2	PF00430.19	ATP-synt_B	ATP synthase B/B' CF(0
g60445	9.49627e-199	1.50145	0.717	0.278	1.81721e-194	GO:0003735;GO:0006412;GO:0005840	molecular_function;biological_process;cellular_component	MF:structural constituent of ribosome;BP:translation;CC:ribosome					ENOG410YJZJ	S:Function unknown	XP_031118905.1	F-box/FBD/LRR-repeat protein At1g13570-like [Ipomoea triloba]	sp|P82278|RR9_SPIOL	30S ribosomal protein S9, chloroplastic OS=Spinacia oleracea OX=3562 GN=PRPS9 PE=1 SV=2	PF00380.20;PF08387.11;PF00646.34	Ribosomal_S9;FBD;F-box	Ribosomal protein S9/S16;FBD;F-box domain
g31185	8.87394e-137	1.50105	0.521	0.177	1.69812e-132	GO:0009535;GO:0016168;GO:0009522;GO:0009523;GO:0016021;GO:0018298;GO:0009768;GO:0009416;GO:0009765	cellular_component;molecular_function;cellular_component;cellular_component;cellular_component;biological_process;biological_process;biological_process;biological_process	CC:chloroplast thylakoid membrane;MF:chlorophyll binding;CC:photosystem I;CC:photosystem II;CC:integral component of membrane;BP:protein-chromophore linkage;BP:photosynthesis, light harvesting in photosystem I;BP:response to light stimulus;BP:photosynthesis, light harvesting	K08908	LHCA2	map00196	Photosynthesis - antenna proteins	ENOG410YE22	S:Function unknown	XP_031091674.1	photosystem I chlorophyll a/b-binding protein 6, chloroplastic [Ipomoea triloba]	sp|Q8LCQ4|LHCA6_ARATH	Photosystem I chlorophyll a/b-binding protein 6, chloroplastic OS=Arabidopsis thaliana OX=3702 GN=LHCA6 PE=1 SV=1	PF00504.22	Chloroa_b-bind	Chlorophyll A-B binding protein
g55	3.86049e-98	1.50029	0.429	0.15	7.38744e-94	GO:0005506;GO:0016705;GO:0016021;GO:0004497;GO:0020037	molecular_function;molecular_function;cellular_component;molecular_function;molecular_function	MF:iron ion binding;MF:oxidoreductase activity, acting on paired donors, with incorporation or reduction of molecular oxygen;CC:integral component of membrane;MF:monooxygenase activity;MF:heme binding					COG2124	Q:Secondary metabolites biosynthesis, transport and catabolism	XP_031117541.1	alkane hydroxylase MAH1-like [Ipomoea triloba]	sp|Q9FVS9|C96AF_ARATH	Alkane hydroxylase MAH1 OS=Arabidopsis thaliana OX=3702 GN=CYP96A15 PE=2 SV=1	PF00067.23	p450	Cytochrome P450
g25672	6.11915e-157	1.49907	0.586	0.213	1.17096e-152	GO:0009535;GO:0016021	cellular_component;cellular_component	CC:chloroplast thylakoid membrane;CC:integral component of membrane					COG0545	V:Defense mechanisms	XP_031110334.1	uncharacterized protein LOC116014419 [Ipomoea triloba]
g31592	3.81858e-297	1.4982	0.901	0.434	7.30724e-293	GO:0008168;GO:0046406;GO:0015995;GO:0032259;GO:0009507	molecular_function;molecular_function;biological_process;biological_process;cellular_component	MF:methyltransferase activity;MF:magnesium protoporphyrin IX methyltransferase activity;BP:chlorophyll biosynthetic process;BP:methylation;CC:chloroplast	K03428	bchM, chlM	map00860	Porphyrin and chlorophyll metabolism	COG2227	H:Coenzyme transport and metabolism	XP_031093037.1	magnesium protoporphyrin IX methyltransferase, chloroplastic [Ipomoea triloba]	sp|Q9SW18|CHLM_ARATH	Magnesium protoporphyrin IX methyltransferase, chloroplastic OS=Arabidopsis thaliana OX=3702 GN=CHLM PE=1 SV=1	PF07109.12;PF13649.7;PF08242.13;PF13489.7;PF08241.13;PF13847.7;PF05175.15;PF06325.14;PF13679.7	Mg-por_mtran_C;Methyltransf_25;Methyltransf_12;Methyltransf_23;Methyltransf_11;Methyltransf_31;MTS;PrmA;Methyltransf_32	Magnesium-protoporphyrin IX methyltransferase C-terminus;Methyltransferase domain;Methyltransferase domain;Methyltransferase domain;Methyltransferase domain;Methyltransferase domain;Methyltransferase small domain;Ribosomal protein L11 methyltransferase (PrmA;Methyltransferase domain
g60789	2.86128e-105	1.49819	0.457	0.165	5.47535e-101	GO:0016021;GO:0009507	cellular_component;cellular_component	CC:integral component of membrane;CC:chloroplast					ENOG4111JKW	S:Function unknown	XP_031120086.1	protein RESISTANCE TO PHYTOPHTHORA 1, chloroplastic isoform X2 [Ipomoea triloba]	sp|Q9ZU82|RPH1_ARATH	Protein RESISTANCE TO PHYTOPHTHORA 1, chloroplastic OS=Arabidopsis thaliana OX=3702 GN=RPH1 PE=2 SV=2	PF02365.16	NAM	No apical meristem (NAM) protein
g61048	3.30007e-133	1.49725	0.534	0.193	6.31501e-129				K10761	THG1			COG4021	S:Function unknown	XP_031108426.1	uncharacterized protein LOC116012895 [Ipomoea triloba]	sp|F4IRQ5|THG1_ARATH	tRNA(His) guanylyltransferase 1 OS=Arabidopsis thaliana OX=3702 GN=THG1 PE=1 SV=1	PF04446.13;PF14413.7;PF00078.28;PF13456.7;PF13966.7	Thg1;Thg1C;RVT_1;RVT_3;zf-RVT	tRNAHis guanylyltransferase;Thg1 C terminal domain;Reverse transcriptase (RNA-dependent DNA polymerase;Reverse transcriptase-like;zinc-binding in reverse transcriptase
g9384	0	1.49482	0.997	0.63	0	GO:0016788	molecular_function	MF:hydrolase activity, acting on ester bonds					ENOG410Y9BR	S:Function unknown	XP_031111448.1	GDSL esterase/lipase At4g01130-like [Ipomoea triloba]	sp|Q9M153|GDL61_ARATH	GDSL esterase/lipase At4g01130 OS=Arabidopsis thaliana OX=3702 GN=At4g01130 PE=2 SV=1	PF00657.23;PF14159.7	Lipase_GDSL;CAAD	GDSL-like Lipase/Acylhydrolase;CAAD domains of cyanobacterial aminoacyl-tRNA synthetase
g46545	3.87057e-293	1.49385	0.914	0.423	7.40672e-289	GO:0004047;GO:0006887;GO:0000145;GO:0019464;GO:0006546;GO:0005739;GO:0008483;GO:0015031;GO:0032259	molecular_function;biological_process;cellular_component;biological_process;biological_process;cellular_component;molecular_function;biological_process;biological_process	MF:aminomethyltransferase activity;BP:exocytosis;CC:exocyst;BP:glycine decarboxylation via glycine cleavage system;BP:glycine catabolic process;CC:mitochondrion;MF:transaminase activity;BP:protein transport;BP:methylation	K00605	gcvT, AMT	map00630;map00670;map00260	Glyoxylate and dicarboxylate metabolism;One carbon pool by folate;Glycine, serine and threonine metabolism	COG0404	E:Amino acid transport and metabolism	XP_031124808.1	aminomethyltransferase, mitochondrial [Ipomoea triloba]	sp|P54260|GCST_SOLTU	Aminomethyltransferase, mitochondrial OS=Solanum tuberosum OX=4113 GN=GDCST PE=2 SV=1	PF01571.22;PF08669.12	GCV_T;GCV_T_C	Aminomethyltransferase folate-binding domain;Glycine cleavage T-protein C-terminal barrel domain
g59012	2.80213e-113	1.49305	0.485	0.175	5.36216e-109	GO:0016554;GO:0005739;GO:0009507;GO:1900865	biological_process;cellular_component;cellular_component;biological_process	BP:cytidine to uridine editing;CC:mitochondrion;CC:chloroplast;BP:chloroplast RNA modification					ENOG410YD5Z	S:Function unknown	XP_031126294.1	DAG protein, chloroplastic-like [Ipomoea triloba]	sp|Q9LPZ1|MORF9_ARATH	Multiple organellar RNA editing factor 9, chloroplastic OS=Arabidopsis thaliana OX=3702 GN=MORF9 PE=1 SV=1
g21284	5.00367e-92	1.49227	0.398	0.135	9.57502e-88				K17710	PTCD1			ENOG410Z7Z7	S:Function unknown	XP_031104053.1	pentatricopeptide repeat-containing protein At5g25630-like [Ipomoea triloba]			PF13041.7;PF12854.8;PF13812.7;PF01535.21;PF17177.5;PF10037.10	PPR_2;PPR_1;PPR_3;PPR;PPR_long;MRP-S27	PPR repeat family;PPR repeat;Pentatricopeptide repeat domain;PPR repeat;Pentacotripeptide-repeat region of PRORP;Mitochondrial 28S ribosomal protein S27
g24793	1.55969e-159	1.49061	0.635	0.249	2.98462e-155	GO:0004150;GO:0005737;GO:0046654;GO:0006760;GO:0046656	molecular_function;cellular_component;biological_process;biological_process;biological_process	MF:dihydroneopterin aldolase activity;CC:cytoplasm;BP:tetrahydrofolate biosynthetic process;BP:folic acid-containing compound metabolic process;BP:folic acid biosynthetic process	K01633	folB	map00790	Folate biosynthesis	COG1539	H:Coenzyme transport and metabolism	XP_031103603.1	dihydroneopterin aldolase 1-like [Ipomoea triloba]	sp|Q9SF23|FOLB1_ARATH	Dihydroneopterin aldolase 1 OS=Arabidopsis thaliana OX=3702 GN=FOLB1 PE=1 SV=1	PF02152.19	FolB	Dihydroneopterin aldolase
g29134	7.20303e-267	1.48862	0.851	0.347	1.37837e-262	GO:0006565;GO:0004372;GO:0046655;GO:1904482;GO:0050897;GO:0008270;GO:0035999;GO:0019264;GO:0030170;GO:0006544;GO:0008168;GO:0046653;GO:0032259;GO:0016597;GO:0006730;GO:0070905	biological_process;molecular_function;biological_process;biological_process;molecular_function;molecular_function;biological_process;biological_process;molecular_function;biological_process;molecular_function;biological_process;biological_process;molecular_function;biological_process;molecular_function	BP:L-serine catabolic process;MF:glycine hydroxymethyltransferase activity;BP:folic acid metabolic process;BP:cellular response to tetrahydrofolate;MF:cobalt ion binding;MF:zinc ion binding;BP:tetrahydrofolate interconversion;BP:glycine biosynthetic process from serine;MF:pyridoxal phosphate binding;BP:glycine metabolic process;MF:methyltransferase activity;BP:tetrahydrofolate metabolic process;B…	K00600	glyA, SHMT	map00460;map00630;map00670;map00260	Cyanoamino acid metabolism;Glyoxylate and dicarboxylate metabolism;One carbon pool by folate;Glycine, serine and threonine metabolism	COG0112	S:Function unknown	XP_031108315.1	serine hydroxymethyltransferase, mitochondrial [Ipomoea triloba]	sp|P50433|GLYM_SOLTU	Serine hydroxymethyltransferase, mitochondrial OS=Solanum tuberosum OX=4113 PE=2 SV=1	PF00464.20	SHMT	Serine hydroxymethyltransferase
g25541	1.84973e-188	1.48742	0.701	0.262	3.53965e-184	GO:0052716;GO:0016791;GO:0004322;GO:0048046;GO:0046274;GO:0006826;GO:0005886;GO:0005975;GO:0005507;GO:0055072	molecular_function;molecular_function;molecular_function;cellular_component;biological_process;biological_process;cellular_component;biological_process;molecular_function;biological_process	MF:hydroquinone;MF:phosphatase activity;MF:ferroxidase activity;CC:apoplast;BP:lignin catabolic process;BP:iron ion transport;CC:plasma membrane;BP:carbohydrate metabolic process;MF:copper ion binding;BP:iron ion homeostasis	K05909	E1.10.3.2			COG2132	Q:Secondary metabolites biosynthesis, transport and catabolism	KAB2596225.1	laccase-4-like [Pyrus ussuriensis x Pyrus communis]	sp|Q0IQU1|LAC22_ORYSJ	Laccase-22 OS=Oryza sativa subsp. japonica OX=39947 GN=LAC22 PE=2 SV=2	PF00316.21;PF00394.23;PF07731.15;PF07732.16;PF18913.1	FBPase;Cu-oxidase;Cu-oxidase_2;Cu-oxidase_3;FBPase_C	Fructose-1-6-bisphosphatase, N-terminal domain;Multicopper oxidase;Multicopper oxidase;Multicopper oxidase;Fructose-1-6-bisphosphatase, C-terminal domain
g25593	4.19391e-67	1.48738	0.317	0.109	8.02546e-63								ENOG4111W3N	S:Function unknown	XP_031108272.1	thylakoid lumenal 15 kDa protein 1, chloroplastic [Ipomoea triloba]	sp|O22160|TL15A_ARATH	Thylakoid lumenal 15 kDa protein 1, chloroplastic OS=Arabidopsis thaliana OX=3702 GN=At2g44920 PE=1 SV=2	PF00805.23;PF13599.7;PF13576.7	Pentapeptide;Pentapeptide_4;Pentapeptide_3	Pentapeptide repeats (8 copies;Pentapeptide repeats (9 copies;Pentapeptide repeats (9 copies
g1123	8.6945e-72	1.48648	0.363	0.133	1.66378e-67								COG0300	S:Function unknown	XP_031115266.1	uncharacterized protein LOC116019258 [Ipomoea triloba]	sp|Q56841|HCDS_XANP2	2-(S)-hydroxypropyl-CoM dehydrogenase OS=Xanthobacter autotrophicus (strain ATCC BAA-1158 / Py2) OX=78245 GN=xecE PE=1 SV=1	PF00106.26;PF13561.7	adh_short;adh_short_C2	short chain dehydrogenase;Enoyl-(Acyl carrier protein) reductase
g61239	6.00791e-270	1.48504	0.873	0.383	1.14967e-265	GO:0005840;GO:0009570;GO:0005739;GO:0003735;GO:0003723;GO:0006412;GO:0015935	cellular_component;cellular_component;cellular_component;molecular_function;molecular_function;biological_process;cellular_component	CC:ribosome;CC:chloroplast stroma;CC:mitochondrion;MF:structural constituent of ribosome;MF:RNA binding;BP:translation;CC:small ribosomal subunit	K02946	RP-S10, MRPS10, rpsJ	map03010	Ribosome	COG0051	P:Inorganic ion transport and metabolism	XP_031118213.1	cyanelle 30S ribosomal protein S10 [Ipomoea triloba]	sp|Q9M4Y3|RR10_MESCR	30S ribosomal protein S10, chloroplastic OS=Mesembryanthemum crystallinum OX=3544 GN=RPS10 PE=2 SV=1	PF00338.23	Ribosomal_S10	Ribosomal protein S10p/S20e
g62593	4.81002e-250	1.48429	0.826	0.324	9.20445e-246	GO:0009941;GO:0005960;GO:0004375;GO:0019464;GO:0006546;GO:0005739;GO:0048046;GO:0030170;GO:0016594	cellular_component;cellular_component;molecular_function;biological_process;biological_process;cellular_component;cellular_component;molecular_function;molecular_function	CC:chloroplast envelope;CC:glycine cleavage complex;MF:glycine dehydrogenase (decarboxylating) activity;BP:glycine decarboxylation via glycine cleavage system;BP:glycine catabolic process;CC:mitochondrion;CC:apoplast;MF:pyridoxal phosphate binding;MF:glycine binding	K00281	GLDC, gcvP	map00630;map00260	Glyoxylate and dicarboxylate metabolism;Glycine, serine and threonine metabolism	COG0403	E:Amino acid transport and metabolism	XP_031118113.1	glycine dehydrogenase (decarboxylating), mitochondrial [Ipomoea triloba]	sp|O49954|GCSP_SOLTU	Glycine dehydrogenase (decarboxylating), mitochondrial OS=Solanum tuberosum OX=4113 GN=GDCSP PE=2 SV=1	PF02347.17;PF00266.20	GDC-P;Aminotran_5	Glycine cleavage system P-protein;Aminotransferase class-V
g959	3.3734e-60	1.48406	0.267	0.085	6.45534e-56	GO:0016021	cellular_component	CC:integral component of membrane					ENOG410YU1H	S:Function unknown	XP_031117322.1	uncharacterized protein PAM68-like [Ipomoea triloba]	sp|Q9LTD9|Y5278_ARATH	Uncharacterized protein PAM68-like OS=Arabidopsis thaliana OX=3702 GN=At5g52780 PE=2 SV=1	PF11947.9	DUF3464	Photosynthesis affected mutant 68
g48811	1.65021e-247	1.48232	0.832	0.37	3.15783e-243	GO:0009535;GO:0008266;GO:0022626;GO:0005840;GO:0009570;GO:0005634;GO:0019843;GO:0003735;GO:0006412;GO:0009507	cellular_component;molecular_function;cellular_component;cellular_component;cellular_component;cellular_component;molecular_function;molecular_function;biological_process;cellular_component	CC:chloroplast thylakoid membrane;MF:poly(U) RNA binding;CC:cytosolic ribosome;CC:ribosome;CC:chloroplast stroma;CC:nucleus;MF:rRNA binding;MF:structural constituent of ribosome;BP:translation;CC:chloroplast	K02926	RP-L4, MRPL4, rplD	map03010	Ribosome	COG0088	S:Function unknown	XP_031121382.1	50S ribosomal protein L4, chloroplastic [Ipomoea triloba]	sp|O80361|RK4_TOBAC	50S ribosomal protein L4, chloroplastic OS=Nicotiana tabacum OX=4097 GN=RPL4 PE=2 SV=1	PF00573.23	Ribosomal_L4	Ribosomal protein L4/L1 family
g43411	0	1.4818	0.986	0.514	0	GO:0019516;GO:0005777;GO:0052854;GO:0008891;GO:0052853;GO:0052852;GO:0010181;GO:0004459;GO:0016491	biological_process;cellular_component;molecular_function;molecular_function;molecular_function;molecular_function;molecular_function;molecular_function;molecular_function	BP:lactate oxidation;CC:peroxisome;MF:medium-chain-(S)-2-hydroxy-acid oxidase activity;MF:glycolate oxidase activity;MF:long-chain-(S)-2-hydroxy-long-chain-acid oxidase activity;MF:very-long-chain-(S)-2-hydroxy-acid oxidase activity;MF:FMN binding;MF:L-lactate dehydrogenase activity;MF:oxidoreductase activity	K11517	HAO	map00630;map04146	Glyoxylate and dicarboxylate metabolism;Peroxisome	COG1304	C:Energy production and conversion	XP_031112036.1	peroxisomal (S)-2-hydroxy-acid oxidase [Ipomoea triloba]	sp|P05414|GOX_SPIOL	Peroxisomal (S)-2-hydroxy-acid oxidase OS=Spinacia oleracea OX=3562 PE=1 SV=1	PF01070.19;PF00478.26	FMN_dh;IMPDH	FMN-dependent dehydrogenase;IMP dehydrogenase / GMP reductase domain
g15497	3.30405e-70	1.48122	0.341	0.126	6.32262e-66	GO:0016021;GO:0003743	cellular_component;molecular_function	CC:integral component of membrane;MF:translation initiation factor activity	K02518	infA			COG0361	J:Translation, ribosomal structure and biogenesis	XP_031098575.1	uncharacterized protein LOC116002545 [Ipomoea triloba]	sp|Q94KR9|IF1C_SOLLC	Translation initiation factor IF-1, chloroplastic OS=Solanum lycopersicum OX=4081 GN=infA PE=2 SV=1	PF03140.16;PF01176.20	DUF247;eIF-1a	Plant protein of unknown function;Translation initiation factor 1A / IF-1
g34037	1.8905e-86	1.47931	0.407	0.15	3.61766e-82	GO:0003824;GO:0050662	molecular_function;molecular_function	MF:catalytic activity;MF:coenzyme binding	K07071	K07071			COG1090	S:Function unknown	XP_031131057.1	epimerase family protein SDR39U1 homolog, chloroplastic [Ipomoea triloba]	sp|Q9SJU9|GC1_ARATH	Epimerase family protein SDR39U1 homolog, chloroplastic OS=Arabidopsis thaliana OX=3702 GN=GC1 PE=2 SV=2	PF08338.12;PF01370.22;PF01073.20	DUF1731;Epimerase;3Beta_HSD	Domain of unknown function (DUF1731;NAD dependent epimerase/dehydratase family;3-beta hydroxysteroid dehydrogenase/isomerase family
g38338	1.42891e-60	1.47851	0.267	0.085	2.73437e-56								ENOG410Z7Z7	T:Signal transduction mechanisms	XP_031125596.1	pentatricopeptide repeat-containing protein At5g46580, chloroplastic [Ipomoea triloba]	sp|Q9LS25|PP420_ARATH	Pentatricopeptide repeat-containing protein At5g46580, chloroplastic OS=Arabidopsis thaliana OX=3702 GN=At5g46580 PE=2 SV=1	PF13041.7;PF01535.21;PF12854.8;PF13812.7;PF17177.5	PPR_2;PPR;PPR_1;PPR_3;PPR_long	PPR repeat family;PPR repeat;PPR repeat;Pentatricopeptide repeat domain;Pentacotripeptide-repeat region of PRORP
g13155	2.95634e-108	1.47739	0.468	0.168	5.65725e-104	GO:0000256;GO:0005783;GO:0016813;GO:0016021;GO:0030145;GO:0010136;GO:0004848;GO:0006145	biological_process;cellular_component;molecular_function;cellular_component;molecular_function;biological_process;molecular_function;biological_process	BP:allantoin catabolic process;CC:endoplasmic reticulum;MF:hydrolase activity, acting on carbon-nitrogen (but not peptide) bonds, in linear amidines;CC:integral component of membrane;MF:manganese ion binding;BP:ureide catabolic process;MF:ureidoglycolate hydrolase activity;BP:purine nucleobase catabolic process	K18151	UAH	map00230	Purine metabolism	COG0624	L:Replication, recombination and repair	XP_031098031.1	ureidoglycolate hydrolase [Ipomoea triloba]	sp|Q8VXY9|UAH_ARATH	Ureidoglycolate hydrolase OS=Arabidopsis thaliana OX=3702 GN=UAH PE=1 SV=1	PF01546.29;PF04389.18	Peptidase_M20;Peptidase_M28	Peptidase family M20/M25/M40;Peptidase family M28
g41083	2.49375e-143	1.47656	0.552	0.186	4.77204e-139	GO:0010275;GO:0016020;GO:0009507;GO:0009570	biological_process;cellular_component;cellular_component;cellular_component	BP:NAD(P)H dehydrogenase complex assembly;CC:membrane;CC:chloroplast;CC:chloroplast stroma					ENOG41100U8	S:Function unknown	XP_031124398.1	protein CHLORORESPIRATORY REDUCTION 7, chloroplastic [Ipomoea triloba]	sp|Q9FL87|CRR7_ARATH	Protein CHLORORESPIRATORY REDUCTION 7, chloroplastic OS=Arabidopsis thaliana OX=3702 GN=CRR7 PE=2 SV=1	PF12095.9	CRR7	Protein CHLORORESPIRATORY REDUCTION 7
g50936	0	1.47601	0.995	0.584	0	GO:0008453;GO:0008483;GO:0005777;GO:0003824;GO:0004760;GO:0019265	molecular_function;molecular_function;cellular_component;molecular_function;molecular_function;biological_process	MF:alanine-glyoxylate transaminase activity;MF:transaminase activity;CC:peroxisome;MF:catalytic activity;MF:serine-pyruvate transaminase activity;BP:glycine biosynthetic process, by transamination of glyoxylate	K00830	AGXT	map00630;map00250;map00260;map04146	Glyoxylate and dicarboxylate metabolism;Alanine, aspartate and glutamate metabolism;Glycine, serine and threonine metabolism;Peroxisome	COG0075	E:Amino acid transport and metabolism	XP_031121580.1	serine--glyoxylate aminotransferase [Ipomoea triloba]	sp|Q56YA5|SGAT_ARATH	Serine--glyoxylate aminotransferase OS=Arabidopsis thaliana OX=3702 GN=AGT1 PE=1 SV=2	PF00266.20	Aminotran_5	Aminotransferase class-V
g8907	1.55828e-58	1.47467	0.274	0.093	2.98192e-54	GO:0016021	cellular_component	CC:integral component of membrane					ENOG41121DM	S:Function unknown	XP_031113176.1	uncharacterized protein LOC116016878 [Ipomoea triloba]			PF03350.17	UPF0114	Uncharacterized protein family, UPF0114
g3987	8.377e-243	1.47431	0.83	0.367	1.60302e-238	GO:0009658;GO:0005840;GO:0009941;GO:0009570;GO:0005634;GO:0003735;GO:0009793;GO:0003723;GO:0004672;GO:0009409;GO:0010027;GO:0006412;GO:0005524;GO:0005509	biological_process;cellular_component;cellular_component;cellular_component;cellular_component;molecular_function;biological_process;molecular_function;molecular_function;biological_process;biological_process;biological_process;molecular_function;molecular_function	BP:chloroplast organization;CC:ribosome;CC:chloroplast envelope;CC:chloroplast stroma;CC:nucleus;MF:structural constituent of ribosome;BP:embryo development ending in seed dormancy;MF:RNA binding;MF:protein kinase activity;BP:response to cold;BP:thylakoid membrane organization;BP:translation;MF:ATP binding;MF:calcium ion binding	K02888	RP-L21, MRPL21, rplU	map03010	Ribosome	ENOG4111TX4	J:Translation, ribosomal structure and biogenesis	XP_031115984.1	50S ribosomal protein L21, chloroplastic [Ipomoea triloba]	sp|P24613|RK21_SPIOL	50S ribosomal protein L21, chloroplastic OS=Spinacia oleracea OX=3562 GN=RPL21 PE=1 SV=1	PF00829.22	Ribosomal_L21p	Ribosomal prokaryotic L21 protein
g13238	4.47352e-224	1.47371	0.804	0.356	8.56054e-220	GO:0008168;GO:0016021;GO:0032259	molecular_function;cellular_component;biological_process	MF:methyltransferase activity;CC:integral component of membrane;BP:methylation	K12502	VTE3, APG1	map00130	Ubiquinone and other terpenoid-quinone biosynthesis	COG0500	Q:Secondary metabolites biosynthesis, transport and catabolism	XP_031098498.1	2-methyl-6-phytyl-1,4-hydroquinone methyltransferase 1, chloroplastic-like [Ipomoea triloba]	sp|Q6ZLD3|BQMT1_ORYSJ	2-methyl-6-phytyl-1,4-hydroquinone methyltransferase 1, chloroplastic OS=Oryza sativa subsp. japonica OX=39947 GN=ARSM2 PE=2 SV=1	PF13649.7;PF08241.13;PF01209.19;PF13847.7;PF08242.13;PF13489.7	Methyltransf_25;Methyltransf_11;Ubie_methyltran;Methyltransf_31;Methyltransf_12;Methyltransf_23	Methyltransferase domain;Methyltransferase domain;ubiE/COQ5 methyltransferase family;Methyltransferase domain;Methyltransferase domain;Methyltransferase domain
g9970	1.71077e-66	1.46912	0.293	0.094	3.27373e-62	GO:0004338;GO:0005975;GO:0009251;GO:0008422;GO:0004553	molecular_function;biological_process;biological_process;molecular_function;molecular_function	MF:glucan exo-1,3-beta-glucosidase activity;BP:carbohydrate metabolic process;BP:glucan catabolic process;MF:beta-glucosidase activity;MF:hydrolase activity, hydrolyzing O-glycosyl compounds	K05349	bglX	map00460;map00940;map00500	Cyanoamino acid metabolism;Phenylpropanoid biosynthesis;Starch and sucrose metabolism	COG1472	S:Function unknown	XP_031100779.1	uncharacterized protein LOC116004756 [Ipomoea triloba]	sp|A7LXU3|BGH3B_BACO1	Beta-glucosidase BoGH3B OS=Bacteroides ovatus (strain ATCC 8483 / DSM 1896 / JCM 5824 / NCTC 11153) OX=411476 GN=BACOVA_02659 PE=1 SV=1	PF00933.22;PF01915.23	Glyco_hydro_3;Glyco_hydro_3_C	Glycosyl hydrolase family 3 N terminal domain;Glycosyl hydrolase family 3 C-terminal domain
g43664	0	1.46912	0.993	0.693	0	GO:0005737;GO:0008690;GO:0016021;GO:0047134;GO:0005623;GO:0016671;GO:0045454;GO:0015035;GO:0006662	cellular_component;molecular_function;cellular_component;molecular_function;cellular_component;molecular_function;biological_process;molecular_function;biological_process	CC:cytoplasm;MF:3-deoxy-manno-octulosonate cytidylyltransferase activity;CC:integral component of membrane;MF:protein-disulfide reductase activity;CC:cell;MF:oxidoreductase activity, acting on a sulfur group of donors, disulfide as acceptor;BP:cell redox homeostasis;MF:protein disulfide oxidoreductase activity;BP:glycerol ether metabolic process	K03671	trxA			COG0526	S:Function unknown	XP_031131284.1	uncharacterized protein LOC116032717 [Ipomoea triloba]	sp|Q9SEU6|TRXM4_ARATH	Thioredoxin M4, chloroplastic OS=Arabidopsis thaliana OX=3702 GN=At3g15360 PE=2 SV=2	PF00085.21;PF13098.7;PF14595.7;PF13905.7;PF13192.7;PF13728.7;PF07449.12;PF08534.11	Thioredoxin;Thioredoxin_2;Thioredoxin_9;Thioredoxin_8;Thioredoxin_3;TraF;HyaE;Redoxin	Thioredoxin;Thioredoxin-like domain;Thioredoxin;Thioredoxin-like;Thioredoxin domain;F plasmid transfer operon protein;Hydrogenase-1 expression protein HyaE;Redoxin
g252	0	1.46819	0.943	0.461	0	GO:0009941;GO:0005840;GO:0009570;GO:0003735;GO:0032544;GO:0006412	cellular_component;cellular_component;cellular_component;molecular_function;biological_process;biological_process	CC:chloroplast envelope;CC:ribosome;CC:chloroplast stroma;MF:structural constituent of ribosome;BP:plastid translation;BP:translation	K02895	RP-L24, MRPL24, rplX	map03010	Ribosome	COG0198	J:Translation, ribosomal structure and biogenesis	XP_031114709.1	50S ribosomal protein L24, chloroplastic [Ipomoea triloba]	sp|Q02764|RK24_TOBAC	50S ribosomal protein L24, chloroplastic OS=Nicotiana tabacum OX=4097 GN=RPL24 PE=1 SV=1	PF17136.5;PF00467.30	ribosomal_L24;KOW	Ribosomal proteins 50S L24/mitochondrial 39S L24;KOW motif
g400	1.29959e-102	1.46798	0.449	0.164	2.48689e-98	GO:0042545;GO:0045490;GO:0030599;GO:0045330	biological_process;biological_process;molecular_function;molecular_function	BP:cell wall modification;BP:pectin catabolic process;MF:pectinesterase activity;MF:aspartyl esterase activity	K01051	E3.1.1.11	map00040	Pentose and glucuronate interconversions	COG4677	Q:Secondary metabolites biosynthesis, transport and catabolism	XP_031115565.1	probable pectinesterase 53 [Ipomoea triloba]	sp|Q8VYZ3|PME53_ARATH	Probable pectinesterase 53 OS=Arabidopsis thaliana OX=3702 GN=PME53 PE=2 SV=1	PF01095.20	Pectinesterase	Pectinesterase
g31396	0	1.46669	0.96	0.551	0	GO:0003735;GO:0022627;GO:0006412;GO:0005840	molecular_function;cellular_component;biological_process;cellular_component	MF:structural constituent of ribosome;CC:cytosolic small ribosomal subunit;BP:translation;CC:ribosome	K02961	RP-S17, MRPS17, rpsQ	map03010	Ribosome	COG0186;COG0186	I:Lipid transport and metabolism;Q:Secondary metabolites biosynthesis, transport and catabolism	XP_031091317.1	30S ribosomal protein S17, chloroplastic [Ipomoea triloba]	sp|P16180|RR17_ARATH	30S ribosomal protein S17, chloroplastic OS=Arabidopsis thaliana OX=3702 GN=RPS17 PE=1 SV=1	PF00366.21	Ribosomal_S17	Ribosomal protein S17
g56269	1.82268e-145	1.46581	0.584	0.219	3.48788e-141	GO:0009535;GO:0009941;GO:0009570;GO:0042742;GO:0009052;GO:0004751	cellular_component;cellular_component;cellular_component;biological_process;biological_process;molecular_function	CC:chloroplast thylakoid membrane;CC:chloroplast envelope;CC:chloroplast stroma;BP:defense response to bacterium;BP:pentose-phosphate shunt, non-oxidative branch;MF:ribose-5-phosphate isomerase activity	K01807	rpiA	map00030;map00710	Pentose phosphate pathway;Carbon fixation in photosynthetic organisms	COG0120	G:Carbohydrate transport and metabolism	XP_031127905.1	probable ribose-5-phosphate isomerase 3, chloroplastic [Ipomoea triloba]	sp|Q9S726|RPI3_ARATH	Probable ribose-5-phosphate isomerase 3, chloroplastic OS=Arabidopsis thaliana OX=3702 GN=RPI3 PE=1 SV=1	PF06026.15;PF00455.23	Rib_5-P_isom_A;DeoRC	Ribose 5-phosphate isomerase A (phosphoriboisomerase A;DeoR C terminal sensor domain
g29890	2.39388e-82	1.46534	0.39	0.142	4.58093e-78	GO:0016021	cellular_component	CC:integral component of membrane					ENOG411181N	S:Function unknown	XP_019185819.1	PREDICTED: uncharacterized protein LOC109180602 isoform X1 [Ipomoea nil]
g6895	4.80008e-268	1.46468	0.893	0.379	9.18544e-264	GO:0009535;GO:0009941;GO:0022626;GO:0004356;GO:0009570;GO:0005739;GO:0006542;GO:0048046;GO:0046686;GO:0005524	cellular_component;cellular_component;cellular_component;molecular_function;cellular_component;cellular_component;biological_process;cellular_component;biological_process;molecular_function	CC:chloroplast thylakoid membrane;CC:chloroplast envelope;CC:cytosolic ribosome;MF:glutamate-ammonia ligase activity;CC:chloroplast stroma;CC:mitochondrion;BP:glutamine biosynthetic process;CC:apoplast;BP:response to cadmium ion;MF:ATP binding	K01915	glnA, GLUL	map00630;map00220;map00250;map00910	Glyoxylate and dicarboxylate metabolism;Arginine biosynthesis;Alanine, aspartate and glutamate metabolism;Nitrogen metabolism	COG0174	E:Amino acid transport and metabolism	XP_031113131.1	glutamine synthetase leaf isozyme, chloroplastic-like [Ipomoea triloba]	sp|O22506|GLNA2_DAUCA	Glutamine synthetase, chloroplastic OS=Daucus carota OX=4039 GN=GLN2 PE=2 SV=1	PF00120.25;PF03951.20	Gln-synt_C;Gln-synt_N	Glutamine synthetase, catalytic domain;Glutamine synthetase, beta-Grasp domain
g12309	1.4672e-50	1.46428	0.251	0.088	2.80763e-46	GO:0018026;GO:0032259;GO:0016279;GO:0009507;GO:0030785	biological_process;biological_process;molecular_function;cellular_component;molecular_function	BP:peptidyl-lysine monomethylation;BP:methylation;MF:protein-lysine N-methyltransferase activity;CC:chloroplast;MF:[ribulose-bisphosphate carboxylase]-lysine N-methyltransferase activity	K00592	RBCMT			ENOG410ZY97;ENOG410Y7DR	S:Function unknown;S:Function unknown	XP_031100034.1	ribulose-1,5 bisphosphate carboxylase/oxygenase large subunit N-methyltransferase, chloroplastic [Ipomoea triloba]	sp|P94026|RBCMT_TOBAC	Ribulose-1,5 bisphosphate carboxylase/oxygenase large subunit N-methyltransferase, chloroplastic OS=Nicotiana tabacum OX=4097 GN=RBCMT PE=2 SV=1	PF09273.12;PF00856.29	Rubis-subs-bind;SET	Rubisco LSMT substrate-binding;SET domain
g60183	0	1.46411	0.96	0.582	0	GO:0009535;GO:0009941;GO:0015986;GO:0010319;GO:0046933;GO:0010287;GO:0016020;GO:0042742;GO:0009409;GO:0009773;GO:0009772	cellular_component;cellular_component;biological_process;cellular_component;molecular_function;cellular_component;cellular_component;biological_process;biological_process;biological_process;biological_process	CC:chloroplast thylakoid membrane;CC:chloroplast envelope;BP:ATP synthesis coupled proton transport;CC:stromule;MF:proton-transporting ATP synthase activity, rotational mechanism;CC:plastoglobule;CC:membrane;BP:defense response to bacterium;BP:response to cold;BP:photosynthetic electron transport in photosystem I;BP:photosynthetic electron transport in photosystem II	K02113	ATPF1D, atpH	map00195;map00190	Photosynthesis;Oxidative phosphorylation	COG0712	C:Energy production and conversion	XP_031118732.1	ATP synthase delta chain, chloroplastic [Ipomoea triloba]	sp|P32980|ATPD_TOBAC	ATP synthase delta chain, chloroplastic OS=Nicotiana tabacum OX=4097 GN=ATPD PE=2 SV=1	PF00213.19	OSCP	ATP synthase delta (OSCP) subunit
g12473	1.17188e-88	1.46384	0.373	0.121	2.2425e-84	GO:0006355;GO:0005634;GO:0008270	biological_process;cellular_component;molecular_function	BP:regulation of transcription, DNA-templated;CC:nucleus;MF:zinc ion binding	BP:regulation of transcription, DNA-templated;CC:nucleus;MF:zinc ion binding				COG5641	K:Transcription	XP_031099242.1	zinc finger protein CONSTANS-LIKE 16-like [Ipomoea triloba]	sp|Q8RWD0|COL16_ARATH	Zinc finger protein CONSTANS-LIKE 16 OS=Arabidopsis thaliana OX=3702 GN=COL16 PE=1 SV=2	PF06203.15;PF00643.25	CCT;zf-B_box	CCT motif;B-box zinc finger
g9989	3.52381e-304	1.46131	0.935	0.451	6.74317e-300								COG0702	S:Function unknown	XP_031100193.1	protein PLASTID TRANSCRIPTIONALLY ACTIVE 16, chloroplastic [Ipomoea triloba]	sp|Q9STF2|PTA16_ARATH	Protein PLASTID TRANSCRIPTIONALLY ACTIVE 16, chloroplastic OS=Arabidopsis thaliana OX=3702 GN=PTAC16 PE=1 SV=1	PF13460.7;PF05368.14	NAD_binding_10;NmrA	NAD(P)H-binding;NmrA-like family
g43959	3.02731e-149	1.46075	0.576	0.204	5.79305e-145	GO:0003755	molecular_function	MF:peptidyl-prolyl cis-trans isomerase activity	K01802	E5.2.1.8			COG0545	C:Energy production and conversion	XP_031110819.1	peptidyl-prolyl cis-trans isomerase FKBP16-3, chloroplastic [Ipomoea triloba]	sp|O22870|FK163_ARATH	Peptidyl-prolyl cis-trans isomerase FKBP16-3, chloroplastic OS=Arabidopsis thaliana OX=3702 GN=FKBP16-3 PE=1 SV=2	PF00254.29	FKBP_C	FKBP-type peptidyl-prolyl cis-trans isomerase
g25950	2.41586e-46	1.45914	0.286	0.12	4.62298e-42	GO:0006468;GO:0009555;GO:0030242;GO:0005770;GO:0016236;GO:0006623;GO:0071561;GO:0004674;GO:0034272;GO:0045324;GO:0004672;GO:0009846;GO:0034271;GO:0048015;GO:0005524;GO:0010008	biological_process;biological_process;biological_process;cellular_component;biological_process;biological_process;cellular_component;molecular_function;cellular_component;biological_process;molecular_function;biological_process;cellular_component;biological_process;molecular_function;cellular_component	BP:protein phosphorylation;BP:pollen development;BP:pexophagy;CC:late endosome;BP:macroautophagy;BP:protein targeting to vacuole;CC:nucleus-vacuole junction;MF:protein serine/threonine kinase activity;CC:phosphatidylinositol 3-kinase complex, class III, type II;BP:late endosome to vacuole transport;MF:protein kinase activity;BP:pollen germination;CC:phosphatidylinositol 3-kinase complex, class II…	K08333	PIK3R4, VPS15	map04136	Autophagy - other	ENOG410XPDN	J:Translation, ribosomal structure and biogenesis	XP_031107321.1	serine/threonine-protein kinase VPS15 isoform X1 [Ipomoea triloba]	sp|Q9M0E5|VPS15_ARATH	Serine/threonine-protein kinase VPS15 OS=Arabidopsis thaliana OX=3702 GN=VPS15 PE=1 SV=1	PF00069.26;PF00400.33;PF15925.6;PF07714.18	Pkinase;WD40;SOSSC;PK_Tyr_Ser-Thr	Protein kinase domain;WD domain, G-beta repeat;SOSS complex subunit C;Protein tyrosine and serine/threonine kinase
g37874	1.11582e-53	1.45696	0.279	0.103	2.13524e-49				K22312	ST2A, SOT15			ENOG4111H56	S:Function unknown	XP_031132175.1	cytosolic sulfotransferase 17-like [Ipomoea triloba]	sp|Q9FZ80|SOT17_ARATH	Cytosolic sulfotransferase 17 OS=Arabidopsis thaliana OX=3702 GN=SOT17 PE=1 SV=1	PF00685.28;PF13469.7	Sulfotransfer_1;Sulfotransfer_3	Sulfotransferase domain;Sulfotransferase family
g4630	1.43005e-276	1.45641	0.88	0.396	2.73654e-272	GO:0005840;GO:0005739;GO:0019843;GO:0003735;GO:0006412;GO:0009507	cellular_component;cellular_component;molecular_function;molecular_function;biological_process;cellular_component	CC:ribosome;CC:mitochondrion;MF:rRNA binding;MF:structural constituent of ribosome;BP:translation;CC:chloroplast	K02939	RP-L9, MRPL9, rplI	map03010	Ribosome	ENOG4111HFB	S:Function unknown	Q6JJ61.1	RecName: Full=50S ribosomal protein L9, chloroplastic; AltName: Full=CL9; Flags: Precursor [Ipomoea trifida]	sp|Q6JJ61|RK9_IPOTF	50S ribosomal protein L9, chloroplastic OS=Ipomoea trifida OX=35884 GN=RPL9 PE=3 SV=1	PF03948.15;PF01281.20	Ribosomal_L9_C;Ribosomal_L9_N	Ribosomal protein L9, C-terminal domain;Ribosomal protein L9, N-terminal domain
g61538	2.02189e-54	1.45631	0.279	0.102	3.86909e-50								ENOG4111J3D	S:Function unknown	XP_031118318.1	uncharacterized protein LOC116021927 [Ipomoea triloba]
g44770	0	1.45406	0.963	0.475	0	GO:0009535;GO:0009941;GO:0022626;GO:0004356;GO:0009570;GO:0005739;GO:0006542;GO:0048046;GO:0046686;GO:0005524	cellular_component;cellular_component;cellular_component;molecular_function;cellular_component;cellular_component;biological_process;cellular_component;biological_process;molecular_function	CC:chloroplast thylakoid membrane;CC:chloroplast envelope;CC:cytosolic ribosome;MF:glutamate-ammonia ligase activity;CC:chloroplast stroma;CC:mitochondrion;BP:glutamine biosynthetic process;CC:apoplast;BP:response to cadmium ion;MF:ATP binding	K01915	glnA, GLUL	map00630;map00220;map00250;map00910	Glyoxylate and dicarboxylate metabolism;Arginine biosynthesis;Alanine, aspartate and glutamate metabolism;Nitrogen metabolism	COG0174	E:Amino acid transport and metabolism	XP_031121710.1	glutamine synthetase leaf isozyme, chloroplastic [Ipomoea triloba]	sp|P15102|GLNA4_PHAVU	Glutamine synthetase leaf isozyme, chloroplastic OS=Phaseolus vulgaris OX=3885 PE=2 SV=1	PF00120.25;PF03951.20	Gln-synt_C;Gln-synt_N	Glutamine synthetase, catalytic domain;Glutamine synthetase, beta-Grasp domain
g35189	1.35235e-58	1.45069	0.27	0.09	2.58785e-54	GO:0003824;GO:0016791	molecular_function;molecular_function	MF:catalytic activity;MF:phosphatase activity					ENOG4111HP2	K:Transcription	XP_031131007.1	phosphoglycerate mutase-like protein AT74H [Ipomoea triloba]	sp|Q9MAA2|AT74_ARATH	Phosphoglycerate mutase-like protein AT74 OS=Arabidopsis thaliana OX=3702 GN=At3g05170 PE=2 SV=1	PF00300.23	His_Phos_1	Histidine phosphatase superfamily (branch 1
g60257	7.62195e-296	1.45063	0.926	0.438	1.45854e-291	GO:0006782;GO:0050661;GO:0008883	biological_process;molecular_function;molecular_function	BP:protoporphyrinogen IX biosynthetic process;MF:NADP binding;MF:glutamyl-tRNA reductase activity	K02492	hemA	map00860	Porphyrin and chlorophyll metabolism	COG0373	H:Coenzyme transport and metabolism	XP_031119265.1	glutamyl-tRNA reductase 1, chloroplastic-like [Ipomoea triloba]	sp|P93111|HEM11_CUCSA	Glutamyl-tRNA reductase 1, chloroplastic OS=Cucumis sativus OX=3659 GN=HEMA1 PE=2 SV=1	PF01488.21;PF05201.16;PF00745.21;PF03807.18;PF03446.16;PF02254.19;PF03435.19	Shikimate_DH;GlutR_N;GlutR_dimer;F420_oxidored;NAD_binding_2;TrkA_N;Sacchrp_dh_NADP	Shikimate / quinate 5-dehydrogenase;Glutamyl-tRNAGlu reductase, N-terminal domain;Glutamyl-tRNAGlu reductase, dimerisation domain;NADP oxidoreductase coenzyme F420-dependent;NAD binding domain of 6-phosphogluconate dehydrogenase;TrkA-N domain;Saccharopine dehydrogenase NADP binding domain
g33573	6.30704e-229	1.4498	0.808	0.361	1.20692e-224	GO:0070181;GO:0005840;GO:0003735;GO:0003723;GO:0006412;GO:0015935	molecular_function;cellular_component;molecular_function;molecular_function;biological_process;cellular_component	MF:small ribosomal subunit rRNA binding;CC:ribosome;MF:structural constituent of ribosome;MF:RNA binding;BP:translation;CC:small ribosomal subunit	K02968	RP-S20, rpsT	map03010	Ribosome	ENOG41129UT	J:Translation, ribosomal structure and biogenesis	XP_031090755.1	30S ribosomal protein S20, chloroplastic isoform X2 [Ipomoea triloba]	sp|Q9ASV6|RR20_ARATH	30S ribosomal protein S20, chloroplastic OS=Arabidopsis thaliana OX=3702 GN=RPS20 PE=2 SV=1	PF01649.19	Ribosomal_S20p	Ribosomal protein S20
g1281	6.20515e-70	1.44774	0.362	0.141	1.18742e-65	GO:0032955;GO:0051301	biological_process;biological_process	BP:regulation of barrier septum assembly;BP:cell division					ENOG4110JQH	S:Function unknown	XP_031114776.1	uncharacterized protein LOC116018891 isoform X1 [Ipomoea triloba]			PF12204.9	DUF3598	Domain of unknown function (DUF3598
g24610	2.68191e-68	1.44757	0.327	0.117	5.1321e-64	GO:0008080	molecular_function	MF:N-acetyltransferase activity	K22450	SNAT	map00380	Tryptophan metabolism	ENOG410ZGB6	S:Function unknown	XP_031102394.1	histone acetyltransferase TAP1 [Ipomoea triloba]	sp|A0A0R0IHP4|TAP2_SOYBN	Probable acetyltransferase TAP2 OS=Glycine max OX=3847 GN=TAP2 PE=1 SV=2	PF00583.26;PF13673.8;PF13508.8;PF08445.11;PF13527.8	Acetyltransf_1;Acetyltransf_10;Acetyltransf_7;FR47;Acetyltransf_9	Acetyltransferase (GNAT) family;Acetyltransferase (GNAT) domain;Acetyltransferase (GNAT) domain;FR47-like protein;Acetyltransferase (GNAT) domain
g416	0	1.44358	0.969	0.529	0	GO:0009507;GO:0004324	cellular_component;molecular_function	CC:chloroplast;MF:ferredoxin-NADP+ reductase activity	K02641	petH	map00195	Photosynthesis	COG0369	P:Inorganic ion transport and metabolism	XP_031116195.1	ferredoxin--NADP reductase, leaf-type isozyme, chloroplastic [Ipomoea triloba]	sp|P10933|FENR1_PEA	Ferredoxin--NADP reductase, leaf isozyme, chloroplastic OS=Pisum sativum OX=3888 GN=PETH PE=1 SV=1	PF00175.22	NAD_binding_1	Oxidoreductase NAD-binding domain
g33402	2.67732e-122	1.44199	0.523	0.193	5.12332e-118	GO:0009570;GO:0016787;GO:0009941	cellular_component;molecular_function;cellular_component	CC:chloroplast stroma;MF:hydrolase activity;CC:chloroplast envelope					COG0637	S:Function unknown	XP_031092962.1	CBBY-like protein [Ipomoea triloba]	sp|Q94K71|CBBY_ARATH	CBBY-like protein OS=Arabidopsis thaliana OX=3702 GN=CBBY PE=1 SV=1	PF13419.7;PF00702.27;PF13242.7	HAD_2;Hydrolase;Hydrolase_like	Haloacid dehalogenase-like hydrolase;haloacid dehalogenase-like hydrolase;HAD-hyrolase-like
g1863	9.04641e-173	1.43887	0.658	0.259	1.73112e-168				K22013	SGR, SGRL	map00860	Porphyrin and chlorophyll metabolism	ENOG4111UAI	S:Function unknown	XP_031114906.1	magnesium dechelatase SGRL, chloroplastic [Ipomoea triloba]	sp|Q94AQ9|SGRL_ARATH	Protein STAY-GREEN LIKE, chloroplastic OS=Arabidopsis thaliana OX=3702 GN=SGRL PE=2 SV=1	PF12638.8	Staygreen	Staygreen protein
g23818	2.91438e-157	1.43879	0.628	0.243	5.57695e-153	GO:0005506;GO:0043448;GO:0016021;GO:0009055;GO:0009507	molecular_function;biological_process;cellular_component;molecular_function;cellular_component	MF:iron ion binding;BP:alkane catabolic process;CC:integral component of membrane;MF:electron carrier activity;CC:chloroplast					COG1773	C:Energy production and conversion	XP_031102147.1	uncharacterized protein LOC116006038 [Ipomoea triloba]	sp|P73068|RUBR_SYNY3	Rubredoxin OS=Synechocystis sp. (strain PCC 6803 / Kazusa) OX=1111708 GN=rub PE=3 SV=1	PF00301.21	Rubredoxin	Rubredoxin
g21513	1.35491e-277	1.43825	0.906	0.385	2.59275e-273	GO:0003700;GO:0005634;GO:0046872;GO:0003676	molecular_function;cellular_component;molecular_function;molecular_function	MF:transcription factor activity, sequence-specific DNA binding;CC:nucleus;MF:metal ion binding;MF:nucleic acid binding	MF:transcription factor activity, sequence-specific DNA binding;CC:nucleus;MF:metal ion binding;MF:nucleic acid binding				COG5048	L:Replication, recombination and repair	XP_031103480.1	protein indeterminate-domain 7-like isoform X2 [Ipomoea triloba]	sp|Q8H1F5|IDD7_ARATH	Protein indeterminate-domain 7 OS=Arabidopsis thaliana OX=3702 GN=IDD7 PE=2 SV=1	PF13912.7;PF12171.9;PF00096.27	zf-C2H2_6;zf-C2H2_jaz;zf-C2H2	C2H2-type zinc finger;Zinc-finger double-stranded RNA-binding;Zinc finger, C2H2 type
g23668	2.0703e-142	1.43816	0.576	0.212	3.96173e-138								ENOG4111US0	S:Function unknown	XP_031102853.1	uncharacterized protein LOC116006563 [Ipomoea triloba]			PF09353.11	DUF1995	Domain of unknown function (DUF1995
g60720	3.01141e-97	1.43764	0.435	0.155	5.76264e-93	GO:0006468;GO:0016021;GO:0004674;GO:0005886;GO:0005524;GO:0048544	biological_process;cellular_component;molecular_function;cellular_component;molecular_function;biological_process	BP:protein phosphorylation;CC:integral component of membrane;MF:protein serine/threonine kinase activity;CC:plasma membrane;MF:ATP binding;BP:recognition of pollen					COG0515	T:Signal transduction mechanisms	XP_031119911.1	receptor-like serine/threonine-protein kinase SD1-8 [Ipomoea triloba]	sp|O81905|SD18_ARATH	Receptor-like serine/threonine-protein kinase SD1-8 OS=Arabidopsis thaliana OX=3702 GN=SD18 PE=1 SV=1	PF00069.26;PF07714.18;PF01453.25;PF00954.21;PF08276.12;PF11883.9	Pkinase;PK_Tyr_Ser-Thr;B_lectin;S_locus_glycop;PAN_2;DUF3403	Protein kinase domain;Protein tyrosine and serine/threonine kinase;D-mannose binding lectin;S-locus glycoprotein domain;PAN-like domain;Domain of unknown function (DUF3403
g42642	6.52094e-241	1.4375	0.833	0.362	1.24785e-236	GO:0003824;GO:0016021;GO:0050662	molecular_function;cellular_component;molecular_function	MF:catalytic activity;CC:integral component of membrane;MF:coenzyme binding					ENOG410XQQI	S:Function unknown	XP_031122276.1	chloroplast stem-loop binding protein of 41 kDa b, chloroplastic [Ipomoea triloba]	sp|Q9SA52|CP41B_ARATH	Chloroplast stem-loop binding protein of 41 kDa b, chloroplastic OS=Arabidopsis thaliana OX=3702 GN=CSP41B PE=1 SV=1	PF01370.22;PF16363.6;PF13460.7	Epimerase;GDP_Man_Dehyd;NAD_binding_10	NAD dependent epimerase/dehydratase family;GDP-mannose 4,6 dehydratase;NAD(P)H-binding
g62	0	1.43555	0.973	0.549	0	GO:0009507;GO:0005829;GO:0019253;GO:0043531;GO:0046686;GO:1903862;GO:0004618;GO:0006096;GO:0005524;GO:0006094	cellular_component;cellular_component;biological_process;molecular_function;biological_process;biological_process;molecular_function;biological_process;molecular_function;biological_process	CC:chloroplast;CC:cytosol;BP:reductive pentose-phosphate cycle;MF:ADP binding;BP:response to cadmium ion;BP:positive regulation of oxidative phosphorylation;MF:phosphoglycerate kinase activity;BP:glycolytic process;MF:ATP binding;BP:gluconeogenesis	K00927	PGK, pgk	map00010;map00710	Glycolysis / Gluconeogenesis;Carbon fixation in photosynthetic organisms	COG0126	G:Carbohydrate transport and metabolism	XP_031115085.1	phosphoglycerate kinase, chloroplastic [Ipomoea triloba]	sp|Q42961|PGKH_TOBAC	Phosphoglycerate kinase, chloroplastic OS=Nicotiana tabacum OX=4097 PE=2 SV=1	PF00162.20	PGK	Phosphoglycerate kinase
g31524	1.19052e-51	1.43462	0.253	0.088	2.27818e-47	GO:0005524	molecular_function	MF:ATP binding					COG1222;COG1222	I:Lipid transport and metabolism;Q:Secondary metabolites biosynthesis, transport and catabolism	XP_031092621.1	ribulose bisphosphate carboxylase/oxygenase activase, chloroplastic [Ipomoea triloba]	sp|P93431|RCA_ORYSJ	Ribulose bisphosphate carboxylase/oxygenase activase, chloroplastic OS=Oryza sativa subsp. japonica OX=39947 GN=RCA PE=1 SV=2	PF00004.30	AAA	ATPase family associated with various cellular activities (AAA
g52228	2.05471e-112	1.43368	0.456	0.153	3.9319e-108	GO:0005506;GO:0016021;GO:0006486;GO:0016757	molecular_function;cellular_component;biological_process;molecular_function	MF:iron ion binding;CC:integral component of membrane;BP:protein glycosylation;MF:transferase activity, transferring glycosyl groups					ENOG4111VMQ	S:Function unknown	XP_031106016.1	uncharacterized protein LOC116010663 [Ipomoea triloba]			PF00301.21;PF09723.11	Rubredoxin;Zn-ribbon_8	Rubredoxin;Zinc ribbon domain
g50447	4.01725e-302	1.43299	0.952	0.492	7.68741e-298	GO:0008483;GO:0009058;GO:0030170;GO:0003824	molecular_function;biological_process;molecular_function;molecular_function	MF:transaminase activity;BP:biosynthetic process;MF:pyridoxal phosphate binding;MF:catalytic activity	K14272	GGAT	map00630;map00220;map00250;map00260;map00710	Glyoxylate and dicarboxylate metabolism;Arginine biosynthesis;Alanine, aspartate and glutamate metabolism;Glycine, serine and threonine metabolism;Carbon fixation in photosynthetic organisms	COG0436	S:Function unknown	XP_031122698.1	glutamate--glyoxylate aminotransferase 2 [Ipomoea triloba]	sp|Q9S7E9|GGT2_ARATH	Glutamate--glyoxylate aminotransferase 2 OS=Arabidopsis thaliana OX=3702 GN=GGAT2 PE=1 SV=1	PF00155.22	Aminotran_1_2	Aminotransferase class I and II
g35004	7.40113e-162	1.43283	0.645	0.253	1.41628e-157	GO:0004109;GO:0006779	molecular_function;biological_process	MF:coproporphyrinogen oxidase activity;BP:porphyrin-containing compound biosynthetic process	K00228	CPOX, hemF	map00860	Porphyrin and chlorophyll metabolism	COG0408	H:Coenzyme transport and metabolism	XP_031131314.1	oxygen-dependent coproporphyrinogen-III oxidase, chloroplastic-like [Ipomoea triloba]	sp|Q42946|HEM6_TOBAC	Oxygen-dependent coproporphyrinogen-III oxidase, chloroplastic OS=Nicotiana tabacum OX=4097 GN=CPX PE=2 SV=1	PF01218.19	Coprogen_oxidas	Coproporphyrinogen III oxidase
g3967	0	1.43218	0.967	0.55	0	GO:0015074;GO:0016855;GO:0004491;GO:0008270;GO:0003676	biological_process;molecular_function;molecular_function;molecular_function;molecular_function	BP:DNA integration;MF:racemase and epimerase activity, acting on amino acids and derivatives;MF:methylmalonate-semialdehyde dehydrogenase (acylating) activity;MF:zinc ion binding;MF:nucleic acid binding					ENOG410XS4D	S:Function unknown	XP_031131998.1	uncharacterized protein LOC116033393 [Ipomoea triloba]	sp|Q9LU64|SODF2_ARATH	Superoxide dismutase [Fe] 2, chloroplastic OS=Arabidopsis thaliana OX=3702 GN=FSD2 PE=1 SV=1	PF02777.19;PF07727.15;PF00081.23;PF00665.27;PF03732.18;PF13976.7;PF14223.7	Sod_Fe_C;RVT_2;Sod_Fe_N;rve;Retrotrans_gag;gag_pre-integrs;Retrotran_gag_2	Iron/manganese superoxide dismutases, C-terminal domain;Reverse transcriptase (RNA-dependent DNA polymerase;Iron/manganese superoxide dismutases, alpha-hairpin domain;Integrase core domain;Retrotransposon gag protein;GAG-pre-integrase domain;gag-polypeptide of LTR copia-type
g23739	4.66523e-290	1.43052	0.892	0.392	8.92739e-286	GO:0016021	cellular_component	CC:integral component of membrane					COG1512	S:Function unknown	XP_031103513.1	UPF0603 protein At1g54780, chloroplastic [Ipomoea triloba]	sp|Q9ZVL6|U603_ARATH	UPF0603 protein At1g54780, chloroplastic OS=Arabidopsis thaliana OX=3702 GN=At1g54780 PE=1 SV=1	PF04536.15	TPM_phosphatase	TPM domain
g49612	1.16924e-123	1.42824	0.523	0.19	2.23746e-119	GO:0005737;GO:0009579;GO:0002184;GO:0009817;GO:0005829;GO:0006412;GO:0009658;GO:0009793;GO:0042742;GO:0009570;GO:0032544;GO:0005507;GO:0043023;GO:0009507	cellular_component;cellular_component;biological_process;biological_process;cellular_component;biological_process;biological_process;biological_process;biological_process;cellular_component;biological_process;molecular_function;molecular_function;cellular_component	CC:cytoplasm;CC:thylakoid;BP:cytoplasmic translational termination;BP:defense response to fungus, incompatible interaction;CC:cytosol;BP:translation;BP:chloroplast organization;BP:embryo development ending in seed dormancy;BP:defense response to bacterium;CC:chloroplast stroma;BP:plastid translation;MF:copper ion binding;MF:ribosomal large subunit binding;CC:chloroplast	K02838	frr, MRRF, RRF			COG0233	S:Function unknown	XP_031121483.1	ribosome-recycling factor, chloroplastic [Ipomoea triloba]	sp|P37706|RRFC_DAUCA	Ribosome-recycling factor, chloroplastic (Fragment) OS=Daucus carota OX=4039 GN=RRF PE=2 SV=2	PF01765.20	RRF	Ribosome recycling factor
g9993	6.29203e-102	1.42812	0.465	0.173	1.20404e-97	GO:0009535;GO:0016021	cellular_component;cellular_component	CC:chloroplast thylakoid membrane;CC:integral component of membrane					ENOG4111EE5	S:Function unknown	XP_031101001.1	uncharacterized protein LOC116004940 [Ipomoea triloba]
g29334	3.84399e-116	1.4267	0.472	0.162	7.35586e-112	GO:0048046;GO:0009570;GO:0005975;GO:0030246;GO:0047938	cellular_component;cellular_component;biological_process;molecular_function;molecular_function	CC:apoplast;CC:chloroplast stroma;BP:carbohydrate metabolic process;MF:carbohydrate binding;MF:glucose-6-phosphate 1-epimerase activity	K01792	E5.1.3.15	map00010	Glycolysis / Gluconeogenesis	COG0676	G:Carbohydrate transport and metabolism	XP_031109354.1	putative glucose-6-phosphate 1-epimerase [Ipomoea triloba]	sp|Q40784|AAPC_CENCI	Putative glucose-6-phosphate 1-epimerase OS=Cenchrus ciliaris OX=35872 PE=2 SV=1	PF01263.21	Aldose_epim	Aldose 1-epimerase
g23972	4.38779e-83	1.42666	0.376	0.13	8.39647e-79	GO:0006952;GO:0016021;GO:0009607;GO:0005516;GO:0003755	biological_process;cellular_component;biological_process;molecular_function;molecular_function	BP:defense response;CC:integral component of membrane;BP:response to biotic stimulus;MF:calmodulin binding;MF:peptidyl-prolyl cis-trans isomerase activity	K08472	MLO			ENOG410YDNX	D:Cell cycle control, cell division, chromosome partitioning	XP_031103481.1	MLO-like protein 9 [Ipomoea triloba]	sp|O22815|MLO5_ARATH	MLO-like protein 5 OS=Arabidopsis thaliana OX=3702 GN=MLO5 PE=2 SV=1	PF03094.16;PF00254.29	Mlo;FKBP_C	Mlo family;FKBP-type peptidyl-prolyl cis-trans isomerase
g15752	7.27965e-58	1.42413	0.274	0.092	1.39303e-53	GO:0009535;GO:0016021;GO:0009773;GO:0016730	cellular_component;cellular_component;biological_process;molecular_function	CC:chloroplast thylakoid membrane;CC:integral component of membrane;BP:photosynthetic electron transport in photosystem I;MF:oxidoreductase activity, acting on iron-sulfur proteins as donors					ENOG4110C1Q	S:Function unknown	XP_031099144.1	PGR5-like protein 1A, chloroplastic [Ipomoea triloba]	sp|Q8H112|PGL1A_ARATH	PGR5-like protein 1A, chloroplastic OS=Arabidopsis thaliana OX=3702 GN=PGRL1A PE=1 SV=1
g21517	2.61402e-78	1.42412	0.393	0.152	5.00219e-74	GO:0008168;GO:0032259;GO:0008610	molecular_function;biological_process;biological_process	MF:methyltransferase activity;BP:methylation;BP:lipid biosynthetic process					COG2230	S:Function unknown	XP_031102294.1	(S)-coclaurine N-methyltransferase-like [Ipomoea triloba]	sp|Q5C9L6|CNMT_THLFG	(S)-coclaurine N-methyltransferase OS=Thalictrum flavum subsp. glaucum OX=150095 PE=1 SV=1	PF02353.21;PF13847.7;PF08241.13;PF13649.7;PF13489.7;PF08242.13;PF05175.15;PF03848.15;PF02390.18;PF02527.16;PF01135.20;PF05401.12	CMAS;Methyltransf_31;Methyltransf_11;Methyltransf_25;Methyltransf_23;Methyltransf_12;MTS;TehB;Methyltransf_4;GidB;PCMT;NodS	Mycolic acid cyclopropane synthetase;Methyltransferase domain;Methyltransferase domain;Methyltransferase domain;Methyltransferase domain;Methyltransferase domain;Methyltransferase small domain;Tellurite resistance protein TehB;Putative methyltransferase;rRNA small subunit methyltransferase G;Protein-L-isoaspartate(D-aspartate) O-methyltransferase (PCMT;Nodulation protein S (NodS
g54359	2.28052e-243	1.42288	0.85	0.356	4.364e-239	GO:0048573;GO:0030931;GO:0005978;GO:0008878;GO:0048046;GO:0009570;GO:0019252;GO:0005524;GO:0009507	biological_process;cellular_component;biological_process;molecular_function;cellular_component;cellular_component;biological_process;molecular_function;cellular_component	BP:photoperiodism, flowering;CC:heterotetrameric ADPG pyrophosphorylase complex;BP:glycogen biosynthetic process;MF:glucose-1-phosphate adenylyltransferase activity;CC:apoplast;CC:chloroplast stroma;BP:starch biosynthetic process;MF:ATP binding;CC:chloroplast	K00975	glgC	map00520;map00500	Amino sugar and nucleotide sugar metabolism;Starch and sucrose metabolism	COG0448	G:Carbohydrate transport and metabolism	BAF47745.1	ADP-glucose pyrophosphorylase alpha subunit IbAGPa2 [Ipomoea batatas]	sp|P23509|GLGS_SOLTU	Glucose-1-phosphate adenylyltransferase small subunit, chloroplastic/amyloplastic OS=Solanum tuberosum OX=4113 PE=1 SV=2	PF00483.24;PF12804.8	NTP_transferase;NTP_transf_3	Nucleotidyl transferase;MobA-like NTP transferase domain
g1094	1.85688e-72	1.42247	0.406	0.171	3.55333e-68	GO:0017150;GO:0050660	molecular_function;molecular_function	MF:tRNA dihydrouridine synthase activity;MF:flavin adenine dinucleotide binding	K05542	DUS1			COG0042	J:Translation, ribosomal structure and biogenesis	XP_031116801.1	tRNA-dihydrouridine(16/17) synthase [NAD(P)(+)]-like [Ipomoea triloba]	sp|Q8K582|DUS1L_RAT	tRNA-dihydrouridine(16/17) synthase [NAD(P)(+)]-like OS=Rattus norvegicus OX=10116 GN=Dus1l PE=2 SV=1	PF01207.18;PF13855.7;PF12799.8;PF00977.22	Dus;LRR_8;LRR_4;His_biosynth	Dihydrouridine synthase (Dus;Leucine rich repeat;Leucine Rich repeats (2 copies;Histidine biosynthesis protein
g9333	9.82898e-53	1.42243	0.27	0.098	1.88087e-48	GO:0005737;GO:0019499;GO:0004124;GO:0005739;GO:0006534;GO:0006535;GO:0030170;GO:0050017	cellular_component;biological_process;molecular_function;cellular_component;biological_process;biological_process;molecular_function;molecular_function	CC:cytoplasm;BP:cyanide metabolic process;MF:cysteine synthase activity;CC:mitochondrion;BP:cysteine metabolic process;BP:cysteine biosynthetic process from serine;MF:pyridoxal phosphate binding;MF:L-3-cyanoalanine synthase activity	K13034	ATCYSC1	map00460;map00270;map00920	Cyanoamino acid metabolism;Cysteine and methionine metabolism;Sulfur metabolism	COG0031	E:Amino acid transport and metabolism	XP_031112806.1	bifunctional L-3-cyanoalanine synthase/cysteine synthase 1, mitochondrial-like [Ipomoea triloba]	sp|Q76MX2|CAS1_SOLTU	Bifunctional L-3-cyanoalanine synthase/cysteine synthase 1, mitochondrial OS=Solanum tuberosum OX=4113 GN=PCAS-1 PE=1 SV=1	PF00291.26	PALP	Pyridoxal-phosphate dependent enzyme
g5271	7.02842e-96	1.422	0.458	0.174	1.34496e-91	GO:0016554	biological_process	BP:cytidine to uridine editing					ENOG410YAFM	S:Function unknown	XP_031113874.1	multiple organellar RNA editing factor 2, chloroplastic-like [Ipomoea triloba]	sp|Q9C7Y2|MORF5_ARATH	Multiple organellar RNA editing factor 5, chloroplastic/mitochondrial OS=Arabidopsis thaliana OX=3702 GN=MORF5 PE=1 SV=1
g50425	1.06473e-235	1.41745	0.819	0.348	2.03747e-231	GO:0009234;GO:0008935	biological_process;molecular_function	BP:menaquinone biosynthetic process;MF:1,4-dihydroxy-2-naphthoyl-CoA synthase activity	K01661	menB	map00130	Ubiquinone and other terpenoid-quinone biosynthesis	COG0447	H:Coenzyme transport and metabolism	XP_031121490.1	1,4-dihydroxy-2-naphthoyl-CoA synthase, peroxisomal [Ipomoea triloba]	sp|Q8GYN9|MENB_ARATH	1,4-dihydroxy-2-naphthoyl-CoA synthase, peroxisomal OS=Arabidopsis thaliana OX=3702 GN=MENB PE=1 SV=2	PF00378.21;PF16113.6	ECH_1;ECH_2	Enoyl-CoA hydratase/isomerase;Enoyl-CoA hydratase/isomerase
g20621	1.40071e-144	1.41579	0.622	0.245	2.68041e-140	GO:0000076;GO:0006281;GO:0005634;GO:0031298;GO:0000790;GO:0048478;GO:0003677;GO:0043111;GO:0000228	biological_process;biological_process;cellular_component;cellular_component;cellular_component;biological_process;molecular_function;biological_process;cellular_component	BP:DNA replication checkpoint;BP:DNA repair;CC:nucleus;CC:replication fork protection complex;CC:nuclear chromatin;BP:replication fork protection;MF:DNA binding;BP:replication fork arrest;CC:nuclear chromosome	K03155	TIMELESS			ENOG410XQM6	K:Transcription	XP_031093945.1	interaptin [Ipomoea triloba]	sp|Q84JK8|MAKR6_ARATH	Probable membrane-associated kinase regulator 6 OS=Arabidopsis thaliana OX=3702 GN=MAKR6 PE=2 SV=1	PF04821.15	TIMELESS	Timeless protein
g33235	7.0785e-140	1.41531	0.59	0.226	1.35454e-135	GO:0097428;GO:0051539;GO:0009570;GO:0051536;GO:0016226;GO:0005506	biological_process;molecular_function;cellular_component;molecular_function;biological_process;molecular_function	BP:protein maturation by iron-sulfur cluster transfer;MF:4 iron, 4 sulfur cluster binding;CC:chloroplast stroma;MF:iron-sulfur cluster binding;BP:iron-sulfur cluster assembly;MF:iron ion binding					COG0694	S:Function unknown	XP_031090820.1	nifU-like protein 3, chloroplastic isoform X1 [Ipomoea triloba]	sp|Q84RQ7|NIFU3_ARATH	NifU-like protein 3, chloroplastic OS=Arabidopsis thaliana OX=3702 GN=NIFU3 PE=2 SV=1	PF01106.18	NifU	NifU-like domain
g43649	6.14714e-56	1.41485	0.264	0.088	1.17632e-51	GO:0009941;GO:0010027;GO:1901371;GO:0009507	cellular_component;biological_process;biological_process;cellular_component	CC:chloroplast envelope;BP:thylakoid membrane organization;BP:regulation of leaf morphogenesis;CC:chloroplast					ENOG4111MC4	S:Function unknown	XP_031111179.1	uncharacterized protein LOC116015281 [Ipomoea triloba]
g34084	5.79265e-128	1.41375	0.573	0.222	1.10848e-123	GO:0098807	cellular_component	CC:chloroplast thylakoid membrane protein complex					COG0702	S:Function unknown	XP_031132251.1	protein TIC 62, chloroplastic [Ipomoea triloba]	sp|Q8SKU2|TIC62_PEA	Protein TIC 62, chloroplastic OS=Pisum sativum OX=3888 GN=TIC62 PE=1 SV=2	PF13460.7;PF05368.14;PF01073.20;PF01370.22	NAD_binding_10;NmrA;3Beta_HSD;Epimerase	NAD(P)H-binding;NmrA-like family;3-beta hydroxysteroid dehydrogenase/isomerase family;NAD dependent epimerase/dehydratase family
g12175	3.77331e-109	1.41278	0.502	0.199	7.2206e-105	GO:0009507	cellular_component	CC:chloroplast	K06995	K06995			COG3450	T:Signal transduction mechanisms	XP_031099432.1	uncharacterized protein LOC116003669 [Ipomoea triloba]			PF05899.13;PF06249.13;PF07883.12	Cupin_3;EutQ;Cupin_2	Protein of unknown function (DUF861;Ethanolamine utilisation protein EutQ;Cupin domain
g53064	6.49295e-75	1.41224	0.385	0.152	1.24249e-70	GO:0009535;GO:0016021;GO:0005739;GO:0090333;GO:0009704;GO:0071277	cellular_component;cellular_component;cellular_component;biological_process;biological_process;biological_process	CC:chloroplast thylakoid membrane;CC:integral component of membrane;CC:mitochondrion;BP:regulation of stomatal closure;BP:de-etiolation;BP:cellular response to calcium ion					ENOG4111GSH	S:Function unknown	XP_019189742.1	PREDICTED: calcium sensing receptor, chloroplastic-like [Ipomoea nil]	sp|Q9FN48|CAS_ARATH	Calcium sensing receptor, chloroplastic OS=Arabidopsis thaliana OX=3702 GN=CAS PE=1 SV=1	PF00581.21	Rhodanese	Rhodanese-like domain
g46357	6.14195e-90	1.41167	0.412	0.148	1.17532e-85	GO:0009570;GO:0010258	cellular_component;biological_process	CC:chloroplast stroma;BP:NADH dehydrogenase complex (plastoquinone) assembly					ENOG4112CP4	S:Function unknown	XP_031117218.1	uncharacterized protein LOC116020810 [Ipomoea triloba]
g17176	2.14763e-54	1.41074	0.266	0.093	4.1097e-50	GO:0020037;GO:0006979;GO:0005576;GO:0042744;GO:0046872;GO:0004601	molecular_function;biological_process;cellular_component;biological_process;molecular_function;molecular_function	MF:heme binding;BP:response to oxidative stress;CC:extracellular region;BP:hydrogen peroxide catabolic process;MF:metal ion binding;MF:peroxidase activity	K00430	E1.11.1.7	map00940	Phenylpropanoid biosynthesis	ENOG4111FDS	S:Function unknown	XP_031093201.1	peroxidase 51-like [Ipomoea triloba]	sp|Q9SZE7|PER51_ARATH	Peroxidase 51 OS=Arabidopsis thaliana OX=3702 GN=PER51 PE=2 SV=1	PF00141.24	peroxidase	Peroxidase
g8702	2.10754e-61	1.41043	0.31	0.113	4.03299e-57								ENOG4112AFD	S:Function unknown	XP_019191340.1	PREDICTED: uncharacterized protein LOC109185845 isoform X2 [Ipomoea nil]	sp|Q9C5M1|YCED2_ARATH	Large ribosomal RNA subunit accumulation protein YCED homolog 2, chloroplastic OS=Arabidopsis thaliana OX=3702 GN=At3g19800 PE=2 SV=1	PF02620.18	YceD	Large ribosomal RNA subunit accumulation protein YceD
g25501	5.96099e-50	1.40997	0.259	0.095	1.14069e-45	GO:0016021	cellular_component	CC:integral component of membrane					ENOG410ZGH1	S:Function unknown	XP_031109788.1	uncharacterized protein LOC116013958 isoform X2 [Ipomoea triloba]
g9018	7.32358e-182	1.40894	0.712	0.3	1.40144e-177	GO:0009941;GO:0005840;GO:0022625;GO:0009570;GO:0005829;GO:0019843;GO:0003735;GO:0006412	cellular_component;cellular_component;cellular_component;cellular_component;cellular_component;molecular_function;molecular_function;biological_process	CC:chloroplast envelope;CC:ribosome;CC:cytosolic large ribosomal subunit;CC:chloroplast stroma;CC:cytosol;MF:rRNA binding;MF:structural constituent of ribosome;BP:translation	K02906	RP-L3, MRPL3, rplC	map03010	Ribosome	COG0087	S:Function unknown	XP_031114108.1	50S ribosomal protein L3, chloroplastic [Ipomoea triloba]	sp|O80360|RK3_TOBAC	50S ribosomal protein L3, chloroplastic (Fragment) OS=Nicotiana tabacum OX=4097 GN=RPL3 PE=2 SV=1	PF00297.23	Ribosomal_L3	Ribosomal protein L3
g57671	1.07663e-106	1.4074	0.49	0.187	2.06024e-102	GO:0009535;GO:0009941;GO:0015934;GO:0009570;GO:0005634;GO:0003735;GO:0003723;GO:0006412	cellular_component;cellular_component;cellular_component;cellular_component;cellular_component;molecular_function;molecular_function;biological_process	CC:chloroplast thylakoid membrane;CC:chloroplast envelope;CC:large ribosomal subunit;CC:chloroplast stroma;CC:nucleus;MF:structural constituent of ribosome;MF:RNA binding;BP:translation	K02863	RP-L1, MRPL1, rplA	map03010	Ribosome	COG0081	M:Cell wall/membrane/envelope biogenesis	XP_031128072.1	50S ribosomal protein L1, chloroplastic [Ipomoea triloba]	sp|Q9LY66|RK1_ARATH	50S ribosomal protein L1, chloroplastic OS=Arabidopsis thaliana OX=3702 GN=RPL1 PE=1 SV=1	PF00687.22	Ribosomal_L1	Ribosomal protein L1p/L10e family
g11866	5.17305e-272	1.40726	0.906	0.463	9.89914e-268	GO:0042286;GO:0016021;GO:0006779;GO:0008483;GO:0033014;GO:0030170;GO:0009507	molecular_function;cellular_component;biological_process;molecular_function;biological_process;molecular_function;cellular_component	MF:glutamate-1-semialdehyde 2,1-aminomutase activity;CC:integral component of membrane;BP:porphyrin-containing compound biosynthetic process;MF:transaminase activity;BP:tetrapyrrole biosynthetic process;MF:pyridoxal phosphate binding;CC:chloroplast	K01845	hemL	map00860	Porphyrin and chlorophyll metabolism	COG0001	H:Coenzyme transport and metabolism	XP_031100523.1	glutamate-1-semialdehyde 2,1-aminomutase, chloroplastic-like [Ipomoea triloba]	sp|Q40147|GSA_SOLLC	Glutamate-1-semialdehyde 2,1-aminomutase, chloroplastic OS=Solanum lycopersicum OX=4081 PE=2 SV=1	PF00202.22	Aminotran_3	Aminotransferase class-III
g721	9.01042e-64	1.40525	0.316	0.113	1.72423e-59	GO:0010236;GO:0009507	biological_process;cellular_component	BP:plastoquinone biosynthetic process;CC:chloroplast					ENOG4111JVZ	S:Function unknown	XP_031116049.1	fibrillin-5, chloroplastic isoform X1 [Ipomoea triloba]	sp|Q0JD85|PAP7_ORYSJ	Fibrillin protein 5 homolog OS=Oryza sativa subsp. japonica OX=39947 GN=FBN5 PE=1 SV=1	PF04755.13	PAP_fibrillin	PAP_fibrillin
g23854	1.47263e-48	1.40472	0.29	0.12	2.81802e-44	GO:0005524;GO:0004672	molecular_function;molecular_function	MF:ATP binding;MF:protein kinase activity	K20715	PHOT			COG2202	S:Function unknown	XP_031102833.1	phototropin-2-like [Ipomoea triloba]	sp|P93025|PHOT2_ARATH	Phototropin-2 OS=Arabidopsis thaliana OX=3702 GN=PHOT2 PE=1 SV=2	PF00069.26;PF07714.18;PF13426.8;PF00989.26;PF08447.13;PF14531.7	Pkinase;PK_Tyr_Ser-Thr;PAS_9;PAS;PAS_3;Kinase-like	Protein kinase domain;Protein tyrosine and serine/threonine kinase;PAS domain;PAS fold;PAS fold;Kinase-like
g53218	1.23624e-125	1.40461	0.559	0.218	2.36568e-121	GO:0019898;GO:0009654;GO:0005509;GO:0015979	cellular_component;cellular_component;molecular_function;biological_process	CC:extrinsic component of membrane;CC:photosystem II oxygen evolving complex;MF:calcium ion binding;BP:photosynthesis	K02717	psbP	map00195	Photosynthesis	ENOG4111N4V	G:Carbohydrate transport and metabolism	XP_031104874.1	psbP-like protein 1, chloroplastic [Ipomoea triloba]	sp|P82538|PPL1_ARATH	PsbP-like protein 1, chloroplastic OS=Arabidopsis thaliana OX=3702 GN=PPL1 PE=1 SV=1	PF01789.17	PsbP	PsbP
g58019	1.03833e-61	1.40404	0.286	0.095	1.98695e-57	GO:0003755	molecular_function	MF:peptidyl-prolyl cis-trans isomerase activity					COG0545	O:Posttranslational modification, protein turnover, chaperones	XP_031128609.1	peptidyl-prolyl cis-trans isomerase FKBP16-4, chloroplastic [Ipomoea triloba]	sp|Q9SR70|FK164_ARATH	Peptidyl-prolyl cis-trans isomerase FKBP16-4, chloroplastic OS=Arabidopsis thaliana OX=3702 GN=FKBP16-4 PE=1 SV=1	PF00254.29	FKBP_C	FKBP-type peptidyl-prolyl cis-trans isomerase
g58859	1.03008e-59	1.40183	0.308	0.115	1.97115e-55	GO:0045454;GO:0015035;GO:0005623;GO:0009055	biological_process;molecular_function;cellular_component;molecular_function	BP:cell redox homeostasis;MF:protein disulfide oxidoreductase activity;CC:cell;MF:electron carrier activity					COG0278	O:Posttranslational modification, protein turnover, chaperones	XP_031126367.1	bifunctional monothiol glutaredoxin-S16, chloroplastic [Ipomoea triloba]	sp|Q8H7F6|GRS16_ARATH	Bifunctional monothiol glutaredoxin-S16, chloroplastic OS=Arabidopsis thaliana OX=3702 GN=GRXS16 PE=1 SV=2	PF00462.25;PF04908.16	Glutaredoxin;SH3BGR	Glutaredoxin;SH3-binding, glutamic acid-rich protein
g20623	1.04146e-149	1.40042	0.619	0.241	1.99293e-145	GO:0016740;GO:0005840	molecular_function;cellular_component	MF:transferase activity;CC:ribosome					ENOG410XW0X	S:Function unknown	XP_031094013.1	uncharacterized protein LOC115998557 [Ipomoea triloba]			PF11341.9	DUF3143	Protein of unknown function (DUF3143
g55622	3.01437e-235	1.40009	0.815	0.353	5.7683e-231	GO:0032790;GO:0003746;GO:0009507;GO:0003924;GO:0005525	biological_process;molecular_function;cellular_component;molecular_function;molecular_function	BP:ribosome disassembly;MF:translation elongation factor activity;CC:chloroplast;MF:GTPase activity;MF:GTP binding	K02355	fusA, GFM, EFG			COG0480	J:Translation, ribosomal structure and biogenesis	XP_031126905.1	elongation factor G-2, chloroplastic-like [Ipomoea triloba]	sp|P34811|EFGC1_SOYBN	Elongation factor G-1, chloroplastic OS=Glycine max OX=3847 GN=fusA1 PE=3 SV=2	PF00009.28;PF03764.19;PF14492.7;PF00679.25;PF03144.26;PF16658.6	GTP_EFTU;EFG_IV;EFG_III;EFG_C;GTP_EFTU_D2;RF3_C	Elongation factor Tu GTP binding domain;Elongation factor G, domain IV;Elongation Factor G, domain III;Elongation factor G C-terminus;Elongation factor Tu domain 2;Class II release factor RF3, C-terminal domain
g24370	4.74151e-289	1.39977	0.938	0.43	9.07336e-285	GO:0005737;GO:0042132;GO:0005975;GO:0005986;GO:0030388;GO:0006000;GO:0006002;GO:0006094	cellular_component;molecular_function;biological_process;biological_process;biological_process;biological_process;biological_process;biological_process	CC:cytoplasm;MF:fructose 1,6-bisphosphate 1-phosphatase activity;BP:carbohydrate metabolic process;BP:sucrose biosynthetic process;BP:fructose 1,6-bisphosphate metabolic process;BP:fructose metabolic process;BP:fructose 6-phosphate metabolic process;BP:gluconeogenesis	K03841	FBP, fbp	map00010;map00030;map00051;map00710	Glycolysis / Gluconeogenesis;Pentose phosphate pathway;Fructose and mannose metabolism;Carbon fixation in photosynthetic organisms	COG0158	S:Function unknown	XP_031102669.1	fructose-1,6-bisphosphatase, chloroplastic-like [Ipomoea triloba]	sp|P46275|F16P1_PEA	Fructose-1,6-bisphosphatase, chloroplastic OS=Pisum sativum OX=3888 GN=FBP PE=1 SV=2	PF18913.1;PF00316.21	FBPase_C;FBPase	Fructose-1-6-bisphosphatase, C-terminal domain;Fructose-1-6-bisphosphatase, N-terminal domain
g21576	9.63457e-153	1.39876	0.571	0.202	1.84367e-148	GO:0090143;GO:0016020;GO:0010020;GO:0009507;GO:0010190	biological_process;cellular_component;biological_process;cellular_component;biological_process	BP:nucleoid organization;CC:membrane;BP:chloroplast fission;CC:chloroplast;BP:cytochrome b6f complex assembly	K02221	yggT			COG0762	S:Function unknown	XP_031102715.1	ylmG homolog protein 2, chloroplastic [Ipomoea triloba]	sp|Q9C595|YLMG2_ARATH	YlmG homolog protein 2, chloroplastic OS=Arabidopsis thaliana OX=3702 GN=YLMG2 PE=2 SV=1	PF02325.18	YGGT	YGGT family
g55675	0	1.39786	0.967	0.562	0	GO:0009535	cellular_component	CC:chloroplast thylakoid membrane					ENOG4111GIB	S:Function unknown	XP_031125974.1	light-harvesting complex-like protein 3 isotype 2, chloroplastic [Ipomoea triloba]	sp|Q6NKS4|LIL32_ARATH	Light-harvesting complex-like protein 3 isotype 2, chloroplastic OS=Arabidopsis thaliana OX=3702 GN=LIL3.2 PE=1 SV=1
g20741	3.14386e-59	1.39518	0.274	0.092	6.01608e-55	GO:0009535;GO:0016021;GO:0009706	cellular_component;cellular_component;cellular_component	CC:chloroplast thylakoid membrane;CC:integral component of membrane;CC:chloroplast inner membrane					ENOG41129VE	S:Function unknown	XP_031095508.1	uncharacterized protein LOC115999750 isoform X1 [Ipomoea triloba]
g54710	2.68844e-93	1.39413	0.398	0.134	5.1446e-89	GO:0016021;GO:0004222	cellular_component;molecular_function	CC:integral component of membrane;MF:metalloendopeptidase activity					COG0750	S:Function unknown	XP_031105964.1	probable membrane metalloprotease ARASP2, chloroplastic [Ipomoea triloba]	sp|O23053|ARAS2_ARATH	Probable membrane metalloprotease ARASP2, chloroplastic OS=Arabidopsis thaliana OX=3702 GN=ARASP2 PE=2 SV=1	PF02163.23;PF17820.2;PF00595.25;PF13180.7	Peptidase_M50;PDZ_6;PDZ;PDZ_2	Peptidase family M50;PDZ domain;PDZ domain;PDZ domain
g59409	1.19854e-58	1.39281	0.288	0.103	2.29352e-54	GO:0006457;GO:0051082;GO:0005524	biological_process;molecular_function;molecular_function	BP:protein folding;MF:unfolded protein binding;MF:ATP binding	K03283	HSPA1s	map04144;map04141;map03040	Endocytosis;Protein processing in endoplasmic reticulum;Spliceosome	COG0443	O:Posttranslational modification, protein turnover, chaperones	XP_031127321.1	stromal 70 kDa heat shock-related protein, chloroplastic [Ipomoea triloba]	sp|Q02028|HSP7S_PEA	Stromal 70 kDa heat shock-related protein, chloroplastic OS=Pisum sativum OX=3888 GN=HSP70 PE=2 SV=1	PF00012.21;PF06723.14;PF14450.7	HSP70;MreB_Mbl;FtsA	Hsp70 protein;MreB/Mbl protein;Cell division protein FtsA
g55787	1.08011e-81	1.3924	0.407	0.157	2.06691e-77	GO:0000064;GO:1990575;GO:0016021;GO:0016787	molecular_function;biological_process;cellular_component;molecular_function	MF:L-ornithine transmembrane transporter activity;BP:mitochondrial L-ornithine transmembrane transport;CC:integral component of membrane;MF:hydrolase activity	K15109	SLC25A20_29, CACT, CACL, CRC1			ENOG410XS86	S:Function unknown	XP_031128645.1	mitochondrial carnitine/acylcarnitine carrier-like protein [Ipomoea triloba]	sp|Q93XM7|MCAT_ARATH	Mitochondrial carnitine/acylcarnitine carrier-like protein OS=Arabidopsis thaliana OX=3702 GN=BOU PE=1 SV=1	PF00153.28	Mito_carr	Mitochondrial carrier protein
g16912	6.53435e-115	1.39167	0.465	0.158	1.25041e-110	GO:0016787	molecular_function	MF:hydrolase activity					COG0637	S:Function unknown	XP_019182542.1	PREDICTED: haloacid dehalogenase-like hydrolase domain-containing protein At4g39970 [Ipomoea nil]	sp|Q680K2|GPPL1_ARATH	Haloacid dehalogenase-like hydrolase domain-containing protein At4g39970 OS=Arabidopsis thaliana OX=3702 GN=At4g39970 PE=2 SV=1	PF13419.7;PF00702.27	HAD_2;Hydrolase	Haloacid dehalogenase-like hydrolase;haloacid dehalogenase-like hydrolase
g58036	1.50539e-132	1.39085	0.548	0.2	2.88071e-128	GO:0009535;GO:0003755	cellular_component;molecular_function	CC:chloroplast thylakoid membrane;MF:peptidyl-prolyl cis-trans isomerase activity					COG0545	O:Posttranslational modification, protein turnover, chaperones	XP_031128609.1	peptidyl-prolyl cis-trans isomerase FKBP16-4, chloroplastic [Ipomoea triloba]	sp|Q9SR70|FK164_ARATH	Peptidyl-prolyl cis-trans isomerase FKBP16-4, chloroplastic OS=Arabidopsis thaliana OX=3702 GN=FKBP16-4 PE=1 SV=1	PF00254.29	FKBP_C	FKBP-type peptidyl-prolyl cis-trans isomerase
g60681	5.92259e-50	1.38998	0.276	0.107	1.13335e-45	GO:0046577;GO:0016020;GO:0016021;GO:0050660	molecular_function;cellular_component;cellular_component;molecular_function	MF:long-chain-alcohol oxidase activity;CC:membrane;CC:integral component of membrane;MF:flavin adenine dinucleotide binding	K17756	FAO3			COG2303	E:Amino acid transport and metabolism	XP_031119105.1	long-chain-alcohol oxidase FAO4A [Ipomoea triloba]	sp|O65709|FAO4A_ARATH	Long-chain-alcohol oxidase FAO4A OS=Arabidopsis thaliana OX=3702 GN=FAO4A PE=3 SV=2	PF00732.20;PF05199.14	GMC_oxred_N;GMC_oxred_C	GMC oxidoreductase;GMC oxidoreductase
g60867	9.24055e-100	1.38912	0.432	0.15	1.76827e-95	GO:0005344;GO:0019825;GO:0020037;GO:0006631;GO:0019432;GO:0046872	molecular_function;molecular_function;molecular_function;biological_process;biological_process;molecular_function	MF:oxygen transporter activity;MF:oxygen binding;MF:heme binding;BP:fatty acid metabolic process;BP:triglyceride biosynthetic process;MF:metal ion binding					COG1018	S:Function unknown	XP_031118497.1	non-symbiotic hemoglobin 2 [Ipomoea triloba]	sp|Q941P9|HBL2_SOLLC	Non-symbiotic hemoglobin 2 OS=Solanum lycopersicum OX=4081 GN=HB2 PE=2 SV=1	PF00042.23	Globin	Globin
g33489	4.17978e-305	1.3887	0.956	0.508	7.99843e-301	GO:0009535;GO:0051252;GO:1901259;GO:1990904;GO:0003723;GO:0009507;GO:0003729;GO:0006397	cellular_component;biological_process;biological_process;cellular_component;molecular_function;cellular_component;molecular_function;biological_process	CC:chloroplast thylakoid membrane;BP:regulation of RNA metabolic process;BP:chloroplast rRNA processing;CC:ribonucleoprotein complex;MF:RNA binding;CC:chloroplast;MF:mRNA binding;BP:mRNA processing	K11294	NCL, NSR1			ENOG410XSFV;ENOG4111MZ2	S:Function unknown;S:Function unknown	XP_031092348.1	28 kDa ribonucleoprotein, chloroplastic-like [Ipomoea triloba]	sp|P19683|ROC4_NICSY	31 kDa ribonucleoprotein, chloroplastic OS=Nicotiana sylvestris OX=4096 PE=1 SV=1	PF00076.23;PF16367.6	RRM_1;RRM_7	RNA recognition motif. (a.k.a. RRM, RBD, or RNP domain;RNA recognition motif
g55198	2.96502e-170	1.38702	0.676	0.263	5.67386e-166	GO:0005504;GO:0016758;GO:0016021;GO:0009627	molecular_function;molecular_function;cellular_component;biological_process	MF:fatty acid binding;MF:transferase activity, transferring hexosyl groups;CC:integral component of membrane;BP:systemic acquired resistance					ENOG410YXDY	S:Function unknown	XP_019193188.1	PREDICTED: putative lipid-transfer protein DIR1 [Ipomoea nil]	sp|Q8W453|DIRL1_ARATH	Putative lipid-transfer protein DIR1 OS=Arabidopsis thaliana OX=3702 GN=DIR1 PE=1 SV=1	PF14368.7;PF00234.23	LTP_2;Tryp_alpha_amyl	Probable lipid transfer;Protease inhibitor/seed storage/LTP family
g15620	3.55273e-63	1.38375	0.318	0.119	6.79851e-59								COG1357	K:Transcription	XP_031099163.1	thylakoid lumenal protein TL20.3, chloroplastic isoform X1 [Ipomoea triloba]	sp|Q8H1Q1|TL203_ARATH	Thylakoid lumenal protein TL20.3, chloroplastic OS=Arabidopsis thaliana OX=3702 GN=TL20.3 PE=1 SV=1	PF00805.23;PF13599.7;PF13576.7	Pentapeptide;Pentapeptide_4;Pentapeptide_3	Pentapeptide repeats (8 copies;Pentapeptide repeats (9 copies;Pentapeptide repeats (9 copies
g9721	3.63984e-137	1.3835	0.555	0.206	6.96519e-133	GO:0009535;GO:0009654;GO:0015979	cellular_component;cellular_component;biological_process	CC:chloroplast thylakoid membrane;CC:photosystem II oxygen evolving complex;BP:photosynthesis	K08903	psb28	map00195	Photosynthesis	ENOG4111V3V	H:Coenzyme transport and metabolism	XP_019178498.1	PREDICTED: photosystem II reaction center PSB28 protein, chloroplastic [Ipomoea nil]	sp|Q0JG75|PSB28_ORYSJ	Photosystem II reaction center PSB28 protein, chloroplastic OS=Oryza sativa subsp. japonica OX=39947 GN=PSB28 PE=2 SV=2	PF03912.15	Psb28	Psb28 protein
g43435	5.28019e-117	1.38289	0.533	0.211	1.01042e-112								ENOG410ZWW6	S:Function unknown	XP_031109263.1	heme-binding protein 2-like [Ipomoea triloba]	sp|Q9WU63|HEBP2_MOUSE	Heme-binding protein 2 OS=Mus musculus OX=10090 GN=Hebp2 PE=1 SV=1	PF04832.13	SOUL	SOUL heme-binding protein
g62112	1.01225e-127	1.38186	0.549	0.202	1.93703e-123	GO:0004866	molecular_function	MF:endopeptidase inhibitor activity							XP_031120368.1	cysteine protease inhibitor 7-like [Ipomoea triloba]	sp|P20347|CPI1_SOLTU	Cysteine protease inhibitor 1 OS=Solanum tuberosum OX=4113 PE=1 SV=3	PF00197.19	Kunitz_legume	Trypsin and protease inhibitor
g16874	7.02018e-85	1.38035	0.369	0.121	1.34338e-80	GO:0051996;GO:0004310;GO:0016767;GO:0009058	molecular_function;molecular_function;molecular_function;biological_process	MF:squalene synthase activity;MF:farnesyl-diphosphate farnesyltransferase activity;MF:geranylgeranyl-diphosphate geranylgeranyltransferase activity;BP:biosynthetic process	K02291	crtB	map00906	Carotenoid biosynthesis	COG1562	I:Lipid transport and metabolism	XP_031095980.1	phytoene synthase 2, chloroplastic-like [Ipomoea triloba]	sp|P37272|PSY_CAPAN	Bifunctional 15-cis-phytoene synthase, chromoplastic OS=Capsicum annuum OX=4072 GN=PSY1 PE=1 SV=1	PF00494.20	SQS_PSY	Squalene/phytoene synthase
g12238	2.03286e-89	1.37753	0.46	0.189	3.89007e-85	GO:0009840;GO:0003677	cellular_component;molecular_function	CC:chloroplastic endopeptidase Clp complex;MF:DNA binding					ENOG4110YKK	S:Function unknown	XP_031101403.1	clp protease adapter protein ClpF, chloroplastic [Ipomoea triloba]	sp|Q67Y99|CLPF_ARATH	Clp protease adapter protein ClpF, chloroplastic OS=Arabidopsis thaliana OX=3702 GN=CLPF PE=1 SV=1	PF03763.14;PF08755.12;PF02151.20	Remorin_C;YccV-like;UVR	Remorin, C-terminal region;Hemimethylated DNA-binding protein YccV like;UvrB/uvrC motif
g46681	4.76553e-98	1.37745	0.457	0.169	9.11932e-94	GO:0005773;GO:0004602;GO:0045735;GO:0004866	cellular_component;molecular_function;molecular_function;molecular_function	CC:vacuole;MF:glutathione peroxidase activity;MF:nutrient reservoir activity;MF:endopeptidase inhibitor activity					ENOG410YHN1	O:Posttranslational modification, protein turnover, chaperones	XP_031118031.1	sporamin B-like [Ipomoea triloba]	sp|P10965|SPORB_IPOBA	Sporamin B OS=Ipomoea batatas OX=4120 GN=GSPO-B1 PE=2 SV=1	PF00197.19	Kunitz_legume	Trypsin and protease inhibitor
g24059	1.34511e-109	1.37697	0.467	0.167	2.57401e-105	GO:0005737;GO:0016740;GO:0004364;GO:0006749;GO:0043295	cellular_component;molecular_function;molecular_function;biological_process;molecular_function	CC:cytoplasm;MF:transferase activity;MF:glutathione transferase activity;BP:glutathione metabolic process;MF:glutathione binding	K00799	GST, gst	map00480	Glutathione metabolism	COG0625	H:Coenzyme transport and metabolism	XP_031102558.1	glutathione S-transferase F10-like [Ipomoea triloba]	sp|O80852|GSTF9_ARATH	Glutathione S-transferase F9 OS=Arabidopsis thaliana OX=3702 GN=GSTF9 PE=1 SV=1	PF02798.21;PF13417.7;PF00043.26;PF13409.7;PF13410.7;PF14497.7	GST_N;GST_N_3;GST_C;GST_N_2;GST_C_2;GST_C_3	Glutathione S-transferase, N-terminal domain;Glutathione S-transferase, N-terminal domain;Glutathione S-transferase, C-terminal domain;Glutathione S-transferase, N-terminal domain;Glutathione S-transferase, C-terminal domain;Glutathione S-transferase, C-terminal domain
g37881	1.96041e-57	1.37592	0.282	0.099	3.75144e-53				K22312	ST2A, SOT15			ENOG4111H56	S:Function unknown	XP_031132115.1	cytosolic sulfotransferase 17-like [Ipomoea triloba]	sp|Q9M1V2|SOT5_ARATH	Cytosolic sulfotransferase 5 OS=Arabidopsis thaliana OX=3702 GN=SOT5 PE=1 SV=1	PF00685.28;PF13469.7	Sulfotransfer_1;Sulfotransfer_3	Sulfotransferase domain;Sulfotransferase family
g4987	7.24714e-72	1.37477	0.392	0.158	1.38681e-67	GO:0009507	cellular_component	CC:chloroplast					ENOG410Z0WP	S:Function unknown	XP_019162993.1	PREDICTED: uncharacterized protein LOC109159318 [Ipomoea nil]			PF11493.9	TSP9	Thylakoid soluble phosphoprotein TSP9
g30434	3.15158e-50	1.37197	0.267	0.1	6.03086e-46	GO:0016021;GO:0003755	cellular_component;molecular_function	CC:integral component of membrane;MF:peptidyl-prolyl cis-trans isomerase activity					COG0545	S:Function unknown	XP_031091195.1	peptidyl-prolyl cis-trans isomerase FKBP20-2, chloroplastic [Ipomoea triloba]	sp|Q0WRJ7|FK202_ARATH	Peptidyl-prolyl cis-trans isomerase FKBP20-2, chloroplastic OS=Arabidopsis thaliana OX=3702 GN=FKBP20-2 PE=1 SV=1	PF00254.29	FKBP_C	FKBP-type peptidyl-prolyl cis-trans isomerase
g35068	5.74733e-69	1.37008	0.353	0.134	1.09981e-64	GO:0070181;GO:0005840;GO:0019843;GO:0003735;GO:0003746;GO:0006412;GO:0022627	molecular_function;cellular_component;molecular_function;molecular_function;molecular_function;biological_process;cellular_component	MF:small ribosomal subunit rRNA binding;CC:ribosome;MF:rRNA binding;MF:structural constituent of ribosome;MF:translation elongation factor activity;BP:translation;CC:cytosolic small ribosomal subunit	K02990	RP-S6, MRPS6, rpsF	map03010	Ribosome	ENOG4111S82	O:Posttranslational modification, protein turnover, chaperones	XP_019169967.1	PREDICTED: 30S ribosomal protein S6 alpha, chloroplastic-like [Ipomoea nil]	sp|Q8VY91|RR6_ARATH	30S ribosomal protein S6 alpha, chloroplastic OS=Arabidopsis thaliana OX=3702 GN=RPS6 PE=2 SV=1	PF01250.18	Ribosomal_S6	Ribosomal protein S6
g33567	2.78692e-247	1.36987	0.847	0.372	5.33305e-243	GO:0003746;GO:0009507;GO:0003924;GO:0005525	molecular_function;cellular_component;molecular_function;molecular_function	MF:translation elongation factor activity;CC:chloroplast;MF:GTPase activity;MF:GTP binding	K02358	tuf, TUFM	map04626	Plant-pathogen interaction	COG0050	S:Function unknown	XP_031091793.1	elongation factor TuA, chloroplastic [Ipomoea triloba]	sp|Q40450|EFTUA_NICSY	Elongation factor TuA, chloroplastic OS=Nicotiana sylvestris OX=4096 GN=TUFA PE=2 SV=2	PF00009.28;PF03143.18;PF03144.26	GTP_EFTU;GTP_EFTU_D3;GTP_EFTU_D2	Elongation factor Tu GTP binding domain;Elongation factor Tu C-terminal domain;Elongation factor Tu domain 2
g37880	2.86934e-99	1.36816	0.411	0.132	5.49076e-95	GO:0008146	molecular_function	MF:sulfotransferase activity	K22312	ST2A, SOT15			ENOG4111H56	S:Function unknown	XP_031132115.1	cytosolic sulfotransferase 17-like [Ipomoea triloba]	sp|P52837|F4ST_FLACH	Flavonol 4'-sulfotransferase OS=Flaveria chlorifolia OX=4228 PE=1 SV=1	PF00685.28	Sulfotransfer_1	Sulfotransferase domain
g59503	2.1412e-73	1.36777	0.379	0.144	4.0974e-69	GO:0016758;GO:0008194;GO:0043231;GO:0080044;GO:0080043	molecular_function;molecular_function;cellular_component;molecular_function;molecular_function	MF:transferase activity, transferring hexosyl groups;MF:UDP-glycosyltransferase activity;CC:intracellular membrane-bounded organelle;MF:quercetin 7-O-glucosyltransferase activity;MF:quercetin 3-O-glucosyltransferase activity	K23452;nau	UGT85A;	map00908	Zeatin biosynthesis	COG1819	O:Posttranslational modification, protein turnover, chaperones	XP_031128437.1	7-deoxyloganetin glucosyltransferase-like [Ipomoea triloba]	sp|F8WLS6|UGT6_CATRO	7-deoxyloganetin glucosyltransferase OS=Catharanthus roseus OX=4058 GN=UGT85A23 PE=1 SV=1	PF00201.19	UDPGT	UDP-glucoronosyl and UDP-glucosyl transferase
g21004	8.65667e-236	1.36607	0.865	0.365	1.65654e-231								ENOG410ZMQE;ENOG410YRRT	S:Function unknown;S:Function unknown	XP_031103322.1	14 kDa proline-rich protein DC2.15-like [Ipomoea triloba]	sp|P14009|14KD_DAUCA	14 kDa proline-rich protein DC2.15 OS=Daucus carota OX=4039 PE=2 SV=1	PF14547.7;PF00234.23	Hydrophob_seed;Tryp_alpha_amyl	Hydrophobic seed protein;Protease inhibitor/seed storage/LTP family
g23730	1.37867e-54	1.36536	0.304	0.119	2.63822e-50	GO:0004222;GO:0005524	molecular_function;molecular_function	MF:metalloendopeptidase activity;MF:ATP binding					ENOG410YFKF	S:Function unknown	XP_031103863.1	uncharacterized protein LOC116007344 isoform X1 [Ipomoea triloba]
g37944	0	1.36434	0.981	0.587	0	GO:0050661;GO:0051287;GO:0016021;GO:0016620;GO:0004365;GO:0006006;GO:0009507	molecular_function;molecular_function;cellular_component;molecular_function;molecular_function;biological_process;cellular_component	MF:NADP binding;MF:NAD binding;CC:integral component of membrane;MF:oxidoreductase activity, acting on the aldehyde or oxo group of donors, NAD or NADP as acceptor;MF:glyceraldehyde-3-phosphate dehydrogenase (NAD+) (phosphorylating) activity;BP:glucose metabolic process;CC:chloroplast	K05298	GAPA	map00710	Carbon fixation in photosynthetic organisms	COG0057	G:Carbohydrate transport and metabolism	XP_019190080.1	PREDICTED: glyceraldehyde-3-phosphate dehydrogenase GAPB, chloroplastic [Ipomoea nil]	sp|P12859|G3PB_PEA	Glyceraldehyde-3-phosphate dehydrogenase B, chloroplastic OS=Pisum sativum OX=3888 GN=GAPB PE=1 SV=2	PF02800.21;PF00044.25;PF02672.16	Gp_dh_C;Gp_dh_N;CP12	Glyceraldehyde 3-phosphate dehydrogenase, C-terminal domain;Glyceraldehyde 3-phosphate dehydrogenase, NAD binding domain;CP12 domain
g16994	2.87925e-53	1.36388	0.29	0.11	5.50974e-49	GO:0016301	molecular_function	MF:kinase activity					COG4886	S:Function unknown	XP_031096103.1	LRR receptor-like serine/threonine-protein kinase FLS2 [Ipomoea triloba]			PF13855.7;PF12799.8;PF08263.13	LRR_8;LRR_4;LRRNT_2	Leucine rich repeat;Leucine Rich repeats (2 copies;Leucine rich repeat N-terminal domain
g47266	2.67005e-52	1.36102	0.295	0.119	5.1094e-48	GO:0071586;GO:0016021;GO:0004197	biological_process;cellular_component;molecular_function	BP:CAAX-box protein processing;CC:integral component of membrane;MF:cysteine-type endopeptidase activity	K07052	K07052			COG1266	S:Function unknown	XP_019170517.1	PREDICTED: uncharacterized protein LOC109166084 isoform X1 [Ipomoea nil]			PF02517.17	CPBP	CPBP intramembrane metalloprotease
g34209	9.33429e-122	1.35886	0.556	0.221	1.78621e-117	GO:0005737;GO:0006796;GO:0000287;GO:0004427	cellular_component;biological_process;molecular_function;molecular_function	CC:cytoplasm;BP:phosphate-containing compound metabolic process;MF:magnesium ion binding;MF:inorganic diphosphatase activity	K01507	ppa	map00190	Oxidative phosphorylation	COG0221	K:Transcription	XP_031129539.1	soluble inorganic pyrophosphatase 6, chloroplastic [Ipomoea triloba]	sp|Q9LXC9|IPYR6_ARATH	Soluble inorganic pyrophosphatase 6, chloroplastic OS=Arabidopsis thaliana OX=3702 GN=PPA6 PE=1 SV=1	PF00719.20	Pyrophosphatase	Inorganic pyrophosphatase
g25184	1.35268e-57	1.35709	0.295	0.107	2.58849e-53	GO:0006486;GO:0016757	biological_process;molecular_function	BP:protein glycosylation;MF:transferase activity, transferring glycosyl groups					ENOG410XTFH	S:Function unknown	XP_031101547.1	probable glycosyltransferase At5g03795 [Ipomoea triloba]	sp|Q9FFN2|GLYT3_ARATH	Probable glycosyltransferase At5g03795 OS=Arabidopsis thaliana OX=3702 GN=At5g03795 PE=3 SV=2	PF01246.21;PF03016.16	Ribosomal_L24e;Exostosin	Ribosomal protein L24e;Exostosin family
g14633	2.44003e-75	1.35394	0.379	0.146	4.66924e-71	GO:0008270	molecular_function	MF:zinc ion binding					ENOG410Z7Z7	S:Function unknown	XP_031099030.1	pentatricopeptide repeat-containing protein At1g31920 [Ipomoea triloba]	sp|Q9C6T2|PPR68_ARATH	Pentatricopeptide repeat-containing protein At1g31920 OS=Arabidopsis thaliana OX=3702 GN=PCMP-H11 PE=2 SV=1	PF01535.21;PF13041.7;PF14432.7;PF12854.8;PF13812.7;PF17177.5	PPR;PPR_2;DYW_deaminase;PPR_1;PPR_3;PPR_long	PPR repeat;PPR repeat family;DYW family of nucleic acid deaminases;PPR repeat;Pentatricopeptide repeat domain;Pentacotripeptide-repeat region of PRORP
g5789	1.156e-231	1.35366	0.834	0.389	2.21212e-227	GO:0008942;GO:0051537	molecular_function;molecular_function	MF:nitrite reductase [NAD(P)H] activity;MF:2 iron, 2 sulfur cluster binding					COG2146	C:Energy production and conversion	XP_031114058.1	uncharacterized protein LOC116017590 [Ipomoea triloba]			PF13806.7	Rieske_2	Rieske-like [2Fe-2S] domain
g13792	1.30156e-132	1.35328	0.567	0.22	2.49066e-128	GO:0016021	cellular_component	CC:integral component of membrane					ENOG4111J4M	S:Function unknown	XP_031098806.1	tetratricopeptide repeat domain-containing protein PYG7, chloroplastic [Ipomoea triloba]	sp|B9DHG0|PYG7_ARATH	Tetratricopeptide repeat domain-containing protein PYG7, chloroplastic OS=Arabidopsis thaliana OX=3702 GN=PYG7 PE=1 SV=1	PF07719.18;PF00515.29;PF13181.7;PF13432.7;PF13424.7;PF13414.7;PF13431.7;PF13371.7;PF14559.7;PF13176.7	TPR_2;TPR_1;TPR_8;TPR_16;TPR_12;TPR_11;TPR_17;TPR_9;TPR_19;TPR_7	Tetratricopeptide repeat;Tetratricopeptide repeat;Tetratricopeptide repeat;Tetratricopeptide repeat;Tetratricopeptide repeat;TPR repeat;Tetratricopeptide repeat;Tetratricopeptide repeat;Tetratricopeptide repeat;Tetratricopeptide repeat
g42084	7.82946e-268	1.35326	0.903	0.451	1.49824e-263	GO:0005737;GO:0020037;GO:0006979;GO:0016757;GO:0006004;GO:0004601	cellular_component;molecular_function;biological_process;molecular_function;biological_process;molecular_function	CC:cytoplasm;MF:heme binding;BP:response to oxidative stress;MF:transferase activity, transferring glycosyl groups;BP:fucose metabolic process;MF:peroxidase activity					ENOG410XTG2	S:Function unknown	KAF4352903.1	hypothetical protein G4B88_026365 [Cannabis sativa]	sp|B7ZWR7|OFUT7_ARATH	O-fucosyltransferase 7 OS=Arabidopsis thaliana OX=3702 GN=OFUT7 PE=2 SV=1	PF10250.10;PF00141.24	O-FucT;peroxidase	GDP-fucose protein O-fucosyltransferase;Peroxidase
g9051	1.33016e-58	1.3527	0.335	0.136	2.54539e-54	GO:0003924;GO:0005739;GO:0005525	molecular_function;cellular_component;molecular_function	MF:GTPase activity;CC:mitochondrion;MF:GTP binding	K19828	MTG1			COG1161	S:Function unknown	XP_031113972.1	DAR GTPase 2, mitochondrial isoform X1 [Ipomoea triloba]	sp|O82497|DGP2_ARATH	DAR GTPase 2, mitochondrial OS=Arabidopsis thaliana OX=3702 GN=DGP2 PE=3 SV=1	PF01926.24;PF03193.17;PF02421.19	MMR_HSR1;RsgA_GTPase;FeoB_N	50S ribosome-binding GTPase;RsgA GTPase;Ferrous iron transport protein B
g60710	4.20564e-86	1.35266	0.412	0.155	8.04792e-82	GO:0004252	molecular_function	MF:serine-type endopeptidase activity	K01358	clpP, CLPP			COG0740	S:Function unknown	XP_031117839.1	ATP-dependent Clp protease proteolytic subunit 4, chloroplastic [Ipomoea triloba]	sp|Q94B60|CLPP4_ARATH	ATP-dependent Clp protease proteolytic subunit 4, chloroplastic OS=Arabidopsis thaliana OX=3702 GN=CLPP4 PE=1 SV=1	PF00574.24	CLP_protease	Clp protease
g24977	0	1.35241	0.999	0.792	0	GO:0016717;GO:0016021;GO:0006629;GO:0102985	molecular_function;cellular_component;biological_process;molecular_function	MF:oxidoreductase activity, acting on paired donors, with oxidation of a pair of donors resulting in the reduction of molecular oxygen to two molecules of water;CC:integral component of membrane;BP:lipid metabolic process;MF:Delta12-fatty-acid desaturase activity	K10256	FAD2	map01040	Biosynthesis of unsaturated fatty acids	COG3239	I:Lipid transport and metabolism	XP_031104159.1	delta(12)-fatty-acid desaturase FAD2-like [Ipomoea triloba]	sp|Q8GZC3|FAD2_VERFO	Delta(12)-fatty-acid desaturase FAD2 OS=Vernicia fordii OX=73154 GN=FAD2 PE=1 SV=1	PF00487.25;PF11960.9	FA_desaturase;DUF3474	Fatty acid desaturase;Domain of unknown function (DUF3474
g24063	1.73371e-255	1.35104	0.901	0.452	3.31762e-251	GO:0009941;GO:0045454;GO:0005623;GO:0009570	cellular_component;biological_process;cellular_component;cellular_component	CC:chloroplast envelope;BP:cell redox homeostasis;CC:cell;CC:chloroplast stroma					COG0526	O:Posttranslational modification, protein turnover, chaperones	XP_031103522.1	thioredoxin-like protein CDSP32, chloroplastic [Ipomoea triloba]	sp|Q9SGS4|CDSP_ARATH	Thioredoxin-like protein CDSP32, chloroplastic OS=Arabidopsis thaliana OX=3702 GN=CDSP32 PE=1 SV=1	PF00085.21;PF14595.7;PF13899.7	Thioredoxin;Thioredoxin_9;Thioredoxin_7	Thioredoxin;Thioredoxin;Thioredoxin-like
g53721	2.91623e-205	1.35087	0.774	0.313	5.5805e-201	GO:0016620;GO:0043878;GO:0004029	molecular_function;molecular_function;molecular_function	MF:oxidoreductase activity, acting on the aldehyde or oxo group of donors, NAD or NADP as acceptor;MF:glyceraldehyde-3-phosphate dehydrogenase (NAD+) (non-phosphorylating) activity;MF:aldehyde dehydrogenase (NAD) activity	K00128	ALDH	map00310;map00561;map00903;map00330;map00053;map00380;map00010;map00620;map00071;map00340;map00280;map00410	Lysine degradation;Glycerolipid metabolism;Limonene and pinene degradation;Arginine and proline metabolism;Ascorbate and aldarate metabolism;Tryptophan metabolism;Glycolysis / Gluconeogenesis;Pyruvate metabolism;Fatty acid degradation;Histidine metabolism;Valine, leucine and isoleucine degradation;beta-Alanine metabolism	COG1012	U:Intracellular trafficking, secretion, and vesicular transport	XP_031105597.1	aldehyde dehydrogenase family 2 member B7, mitochondrial-like [Ipomoea triloba]	sp|Q9SU63|AL2B4_ARATH	Aldehyde dehydrogenase family 2 member B4, mitochondrial OS=Arabidopsis thaliana OX=3702 GN=ALDH2B4 PE=1 SV=1	PF00171.23	Aldedh	Aldehyde dehydrogenase family
g1290	4.00399e-93	1.35062	0.435	0.16	7.66204e-89								ENOG4111M1K	S:Function unknown	XP_019195160.1	PREDICTED: uncharacterized protein LOC109188953 [Ipomoea nil]			PF09366.11	DUF1997	Protein of unknown function (DUF1997
g59925	1.51103e-67	1.35061	0.34	0.126	2.8915e-63	GO:0008802;GO:0016620	molecular_function;molecular_function	MF:betaine-aldehyde dehydrogenase activity;MF:oxidoreductase activity, acting on the aldehyde or oxo group of donors, NAD or NADP as acceptor	K00130	betB, gbsA	map00260	Glycine, serine and threonine metabolism	COG1012	C:Energy production and conversion	XP_031118211.1	betaine aldehyde dehydrogenase, chloroplastic-like [Ipomoea triloba]	sp|O04895|BADH_AMAHP	Betaine aldehyde dehydrogenase, chloroplastic OS=Amaranthus hypochondriacus OX=28502 GN=BADH4 PE=3 SV=1	PF00171.23	Aldedh	Aldehyde dehydrogenase family
g31189	2.96179e-225	1.34872	0.851	0.402	5.66769e-221	GO:0009535;GO:0048046;GO:0009570;GO:0009536;GO:0006457;GO:0046914;GO:0009941;GO:0051085;GO:0051087;GO:0051290;GO:0051082;GO:0009409;GO:0046686;GO:0005739;GO:1901671;GO:0005759;GO:0005507;GO:0009788;GO:0046872;GO:0005524;GO:0009507	cellular_component;cellular_component;cellular_component;cellular_component;biological_process;molecular_function;cellular_component;biological_process;molecular_function;biological_process;molecular_function;biological_process;biological_process;cellular_component;biological_process;cellular_component;molecular_function;biological_process;molecular_function;molecular_function;cellular_component	CC:chloroplast thylakoid membrane;CC:apoplast;CC:chloroplast stroma;CC:plastid;BP:protein folding;MF:transition metal ion binding;CC:chloroplast envelope;BP:chaperone mediated protein folding requiring cofactor;MF:chaperone binding;BP:protein heterotetramerization;MF:unfolded protein binding;BP:response to cold;BP:response to cadmium ion;CC:mitochondrion;BP:positive regulation of superoxide dismu…	K04078	groES, HSPE1			COG0234	O:Posttranslational modification, protein turnover, chaperones	XP_031090467.1	20 kDa chaperonin, chloroplastic-like [Ipomoea triloba]	sp|O65282|CH20_ARATH	20 kDa chaperonin, chloroplastic OS=Arabidopsis thaliana OX=3702 GN=CPN20 PE=1 SV=2	PF00166.22	Cpn10	Chaperonin 10 Kd subunit
g26067	1.44222e-41	1.3479	0.261	0.108	2.75983e-37	GO:0016021	cellular_component	CC:integral component of membrane	K03453	TC.BASS			COG0385	J:Translation, ribosomal structure and biogenesis	XP_031110154.1	sodium/pyruvate cotransporter BASS2, chloroplastic [Ipomoea triloba]	sp|Q1EBV7|BASS2_ARATH	Sodium/pyruvate cotransporter BASS2, chloroplastic OS=Arabidopsis thaliana OX=3702 GN=BASS2 PE=1 SV=1	PF01758.17;PF13593.7	SBF;SBF_like	Sodium Bile acid symporter family;SBF-like CPA transporter family (DUF4137
g60543	1.01933e-142	1.34606	0.617	0.253	1.95059e-138	GO:0009535;GO:0004164;GO:0010206;GO:0009534;GO:0017183;GO:0009570;GO:0016021;GO:0005739;GO:0003756;GO:0046872;GO:0009507	cellular_component;molecular_function;biological_process;cellular_component;biological_process;cellular_component;cellular_component;cellular_component;molecular_function;molecular_function;cellular_component	CC:chloroplast thylakoid membrane;MF:diphthine synthase activity;BP:photosystem II repair;CC:chloroplast thylakoid;BP:peptidyl-diphthamide biosynthetic process from peptidyl-histidine;CC:chloroplast stroma;CC:integral component of membrane;CC:mitochondrion;MF:protein disulfide isomerase activity;MF:metal ion binding;CC:chloroplast	K22520	LQY1			ENOG4111Q7U	S:Function unknown	TEY18629.1	hypothetical protein Saspl_050424 [Salvia splendens]	sp|K4BVL1|SPA_SOLLC	Protein SPA, chloroplastic OS=Solanum lycopersicum OX=4081 GN=SPA PE=2 SV=1	PF17302.3;PF00684.20	DUF5351;DnaJ_CXXCXGXG	Family of unknown function (DUF5351;DnaJ central domain
g381	7.21086e-78	1.34529	0.37	0.131	1.37987e-73	GO:0019843;GO:0000028;GO:0003723;GO:0005525;GO:0043024;GO:0009507	molecular_function;biological_process;molecular_function;molecular_function;molecular_function;cellular_component	MF:rRNA binding;BP:ribosomal small subunit assembly;MF:RNA binding;MF:GTP binding;MF:ribosomal small subunit binding;CC:chloroplast	K03595	era, ERAL1			COG1159	S:Function unknown	XP_031116265.1	GTPase ERA-like, chloroplastic [Ipomoea triloba]	sp|Q8VZ74|ERA_ARATH	GTPase ERA-like, chloroplastic OS=Arabidopsis thaliana OX=3702 GN=At5g66470 PE=2 SV=1	PF01926.24;PF07650.18;PF02421.19;PF03193.17;PF03029.18;PF00009.28;PF00071.23;PF16897.6	MMR_HSR1;KH_2;FeoB_N;RsgA_GTPase;ATP_bind_1;GTP_EFTU;Ras;MMR_HSR1_Xtn	50S ribosome-binding GTPase;KH domain;Ferrous iron transport protein B;RsgA GTPase;Conserved hypothetical ATP binding protein;Elongation factor Tu GTP binding domain;Ras family;C-terminal region of MMR_HSR1 domain
g5555	2.13061e-82	1.34506	0.386	0.14	4.07713e-78								COG5637	S:Function unknown	XP_031112849.1	uncharacterized protein LOC116016633 [Ipomoea triloba]			PF03364.21;PF10604.10	Polyketide_cyc;Polyketide_cyc2	Polyketide cyclase / dehydrase and lipid transport;Polyketide cyclase / dehydrase and lipid transport
g47123	2.78856e-99	1.34172	0.476	0.185	5.3362e-95	GO:0003677	molecular_function	MF:DNA binding					COG0718	E:Amino acid transport and metabolism	XP_031122404.1	nucleoid-associated protein At2g24020, chloroplastic-like [Ipomoea triloba]	sp|O82230|EBFC2_ARATH	Nucleoid-associated protein At2g24020, chloroplastic OS=Arabidopsis thaliana OX=3702 GN=STIC2 PE=1 SV=2	PF02575.17	YbaB_DNA_bd	YbaB/EbfC DNA-binding family
g54957	9.4405e-77	1.34087	0.405	0.16	1.80653e-72	GO:0016020;GO:0016298	cellular_component;molecular_function	CC:membrane;MF:lipase activity					COG2267	I:Lipid transport and metabolism	XP_031105369.1	caffeoylshikimate esterase-like [Ipomoea triloba]	sp|Q9C942|CSE_ARATH	Caffeoylshikimate esterase OS=Arabidopsis thaliana OX=3702 GN=CSE PE=1 SV=1	PF12146.9;PF12697.8;PF00561.21	Hydrolase_4;Abhydrolase_6;Abhydrolase_1	Serine aminopeptidase, S33;Alpha/beta hydrolase family;alpha/beta hydrolase fold
g29200	1.18562e-65	1.33959	0.341	0.131	2.26881e-61	GO:0009904;GO:0016021;GO:0005829;GO:0005623;GO:0009903	biological_process;cellular_component;cellular_component;cellular_component;biological_process	BP:chloroplast accumulation movement;CC:integral component of membrane;CC:cytosol;CC:cell;BP:chloroplast avoidance movement					ENOG410Y9R7	S:Function unknown	XP_031108050.1	protein PLASTID MOVEMENT IMPAIRED 2 [Ipomoea triloba]	sp|Q9C9N6|PMI2_ARATH	Protein PLASTID MOVEMENT IMPAIRED 2 OS=Arabidopsis thaliana OX=3702 GN=PMI2 PE=1 SV=1	PF05701.12	WEMBL	Weak chloroplast movement under blue light
g12836	4.09296e-105	1.3392	0.502	0.198	7.83229e-101	GO:0016021	cellular_component	CC:integral component of membrane					ENOG4111TJM	S:Function unknown	XP_019180285.1	PREDICTED: uncharacterized protein ycf20 [Ipomoea nil]	sp|Q1XDS2|YCF20_PYRYE	Uncharacterized protein ycf20 OS=Pyropia yezoensis OX=2788 GN=ycf20 PE=3 SV=1	PF04483.13	DUF565	Protein of unknown function (DUF565
g15279	4.4658e-63	1.3387	0.305	0.107	8.54576e-59	GO:0003735;GO:0006412;GO:0005840	molecular_function;biological_process;cellular_component	MF:structural constituent of ribosome;BP:translation;CC:ribosome	K02884	RP-L19, MRPL19, rplS	map03010	Ribosome	COG0335	F:Nucleotide transport and metabolism	XP_019190659.1	PREDICTED: 50S ribosomal protein L19-2, chloroplastic-like [Ipomoea nil]	sp|Q8W463|RK191_ARATH	50S ribosomal protein L19-1, chloroplastic OS=Arabidopsis thaliana OX=3702 GN=At4g17560 PE=2 SV=1	PF01245.21	Ribosomal_L19	Ribosomal protein L19
g35236	8.93475e-88	1.33625	0.44	0.17	1.70975e-83								COG0523	S:Function unknown	XP_031132207.1	uncharacterized protein LOC116033596 [Ipomoea triloba]	sp|Q9BRT8|CBWD1_HUMAN	COBW domain-containing protein 1 OS=Homo sapiens OX=9606 GN=CBWD1 PE=2 SV=1	PF02492.20;PF07683.15	cobW;CobW_C	CobW/HypB/UreG, nucleotide-binding domain;Cobalamin synthesis protein cobW C-terminal domain
g57015	7.11381e-154	1.33579	0.629	0.238	1.3613e-149	GO:0016874	molecular_function	MF:ligase activity					ENOG410Z0AY	S:Function unknown	XP_031128997.1	uncharacterized protein LOC116030802 [Ipomoea triloba]			PF03080.16;PF14365.7	Neprosin;Neprosin_AP	Neprosin;Neprosin activation peptide
g5003	1.98904e-97	1.33555	0.476	0.185	3.80622e-93	GO:0036381;GO:0016843;GO:0006520;GO:0003824;GO:0042823;GO:0008615	molecular_function;molecular_function;biological_process;molecular_function;biological_process;biological_process	MF:pyridoxal 5'-phosphate synthase (glutamine hydrolysing) activity;MF:amine-lyase activity;BP:cellular amino acid metabolic process;MF:catalytic activity;BP:pyridoxal phosphate biosynthetic process;BP:pyridoxine biosynthetic process	K06215	pdxS, pdx1	map00750	Vitamin B6 metabolism	COG0214	H:Coenzyme transport and metabolism	XP_031112286.1	probable pyridoxal 5'-phosphate synthase subunit PDX1 [Ipomoea triloba]	sp|Q39963|PDX1_HEVBR	Probable pyridoxal 5'-phosphate synthase subunit PDX1 OS=Hevea brasiliensis OX=3981 GN=PDX1 PE=2 SV=1	PF01680.18;PF05690.15	SOR_SNZ;ThiG	SOR/SNZ family;Thiazole biosynthesis protein ThiG
g20526	1.1961e-132	1.33325	0.595	0.254	2.28885e-128	GO:0016021;GO:0004222	cellular_component;molecular_function	CC:integral component of membrane;MF:metalloendopeptidase activity	K23010	OMA1			COG0501	A:RNA processing and modification	XP_031095866.1	uncharacterized protein LOC116000016 [Ipomoea triloba]	sp|Q9FLI7|NEET_ARATH	CDGSH iron-sulfur domain-containing protein NEET OS=Arabidopsis thaliana OX=3702 GN=NEET PE=1 SV=1	PF01435.19;PF09360.11	Peptidase_M48;zf-CDGSH	Peptidase family M48;Iron-binding zinc finger CDGSH type
g33990	3.21513e-62	1.33182	0.322	0.121	6.15247e-58	GO:0004813;GO:0000049;GO:0002161;GO:0005829;GO:0005739;GO:0008270;GO:0006419;GO:0006400;GO:0016597;GO:0005524;GO:0009507	molecular_function;molecular_function;molecular_function;cellular_component;cellular_component;molecular_function;biological_process;biological_process;molecular_function;molecular_function;cellular_component	MF:alanine-tRNA ligase activity;MF:tRNA binding;MF:aminoacyl-tRNA editing activity;CC:cytosol;CC:mitochondrion;MF:zinc ion binding;BP:alanyl-tRNA aminoacylation;BP:tRNA modification;MF:amino acid binding;MF:ATP binding;CC:chloroplast	K01872	AARS, alaS	map00970	Aminoacyl-tRNA biosynthesis	COG0013	J:Translation, ribosomal structure and biogenesis	XP_019169638.1	PREDICTED: alanine--tRNA ligase, chloroplastic/mitochondrial [Ipomoea nil]	sp|B9HQZ6|SYAP_POPTR	Alanine--tRNA ligase, chloroplastic/mitochondrial OS=Populus trichocarpa OX=3694 GN=POPTRDRAFT_821063 PE=3 SV=1	PF01411.20;PF02272.20;PF07973.15	tRNA-synt_2c;DHHA1;tRNA_SAD	tRNA synthetases class II (A;DHHA1 domain;Threonyl and Alanyl tRNA synthetase second additional domain
g13303	4.88657e-142	1.3315	0.604	0.243	9.35094e-138	GO:0010207;GO:0009543	biological_process;cellular_component	BP:photosystem II assembly;CC:chloroplast thylakoid lumen					ENOG4111U0T	S:Function unknown	XP_031096515.1	photosystem II D1 precursor processing protein PSB27-H2, chloroplastic-like [Ipomoea triloba]	sp|Q9ZVZ9|PB27B_ARATH	Photosystem II D1 precursor processing protein PSB27-H2, chloroplastic OS=Arabidopsis thaliana OX=3702 GN=PSB27-2 PE=1 SV=1	PF13326.7	PSII_Pbs27	Photosystem II Pbs27
g24592	1.56252e-136	1.32862	0.603	0.239	2.99003e-132	GO:0005737;GO:0009570;GO:0003746	cellular_component;cellular_component;molecular_function	CC:cytoplasm;CC:chloroplast stroma;MF:translation elongation factor activity	K02356	efp			COG0231	T:Signal transduction mechanisms	XP_019187564.1	PREDICTED: uncharacterized protein LOC109182012 [Ipomoea nil]	sp|Q54760|EFP_SYNE7	Elongation factor P OS=Synechococcus elongatus (strain PCC 7942) OX=1140 GN=efp PE=3 SV=1	PF09285.12;PF08207.13;PF01132.21	Elong-fact-P_C;EFP_N;EFP	Elongation factor P, C-terminal;Elongation factor P (EF-P) KOW-like domain;Elongation factor P (EF-P) OB domain
g57145	2.38726e-81	1.32775	0.411	0.156	4.56827e-77	GO:0003700;GO:0016987;GO:0009507;GO:0006352;GO:0003677	molecular_function;molecular_function;cellular_component;biological_process;molecular_function	MF:transcription factor activity, sequence-specific DNA binding;MF:sigma factor activity;CC:chloroplast;BP:DNA-templated transcription, initiation;MF:DNA binding	MF:transcription factor activity, sequence-specific DNA binding;MF:sigma factor activity;CC:chloroplast;BP:DNA-templated transcription, initiation;MF:DNA binding				COG0568	K:Transcription	XP_019178801.1	PREDICTED: RNA polymerase sigma factor sigB [Ipomoea nil]	sp|O22056|SIGB_ARATH	RNA polymerase sigma factor sigB OS=Arabidopsis thaliana OX=3702 GN=SIGB PE=2 SV=2	PF04545.17;PF04542.15;PF04539.17	Sigma70_r4;Sigma70_r2;Sigma70_r3	Sigma-70, region 4;Sigma-70 region 2;Sigma-70 region 3
g24978	2.17191e-80	1.32528	0.407	0.158	4.15616e-76	GO:0016787	molecular_function	MF:hydrolase activity					ENOG410Y4Z3	S:Function unknown	XP_031104160.1	probable plastid-lipid-associated protein 13, chloroplastic [Ipomoea triloba]	sp|Q9M2P7|PAP9_ARATH	Probable plastid-lipid-associated protein 9, chloroplastic OS=Arabidopsis thaliana OX=3702 GN=PAP9 PE=1 SV=1	PF04755.13	PAP_fibrillin	PAP_fibrillin
g42735	1.66028e-64	1.3242	0.321	0.114	3.17711e-60								ENOG410YTP7	S:Function unknown	XP_031091968.1	uncharacterized protein LOC115996729 [Ipomoea triloba]
g38686	5.65621e-74	1.32345	0.395	0.155	1.08237e-69	GO:0009658;GO:1901259;GO:0009507	biological_process;biological_process;cellular_component	BP:chloroplast organization;BP:chloroplast rRNA processing;CC:chloroplast					ENOG410YGK0	S:Function unknown	XP_031123992.1	protein DCL, chloroplastic-like [Ipomoea triloba]	sp|Q42463|DCL_SOLLC	Protein DCL, chloroplastic OS=Solanum lycopersicum OX=4081 GN=DCL PE=2 SV=1	PF11523.9	DUF3223	Protein of unknown function (DUF3223
g59648	0	1.32186	0.974	0.586	0	GO:0071486;GO:0009535;GO:0016021;GO:0009611;GO:0071492	biological_process;cellular_component;cellular_component;biological_process;biological_process	BP:cellular response to high light intensity;CC:chloroplast thylakoid membrane;CC:integral component of membrane;BP:response to wounding;BP:cellular response to UV-A					ENOG410Y6IC	S:Function unknown	XP_019165324.1	PREDICTED: stress enhanced protein 1, chloroplastic isoform X1 [Ipomoea nil]	sp|Q9M7I9|STEP1_ARATH	Stress enhanced protein 1, chloroplastic OS=Arabidopsis thaliana OX=3702 GN=SEP1 PE=2 SV=1
g26512	1.67833e-53	1.32115	0.255	0.086	3.21164e-49	GO:0008239;GO:0006508;GO:0004180;GO:0008236	molecular_function;biological_process;molecular_function;molecular_function	MF:dipeptidyl-peptidase activity;BP:proteolysis;MF:carboxypeptidase activity;MF:serine-type peptidase activity	K01285	PRCP			ENOG410Y38A;ENOG410Y38A	I:Lipid transport and metabolism;Q:Secondary metabolites biosynthesis, transport and catabolism	XP_031106979.1	lysosomal Pro-X carboxypeptidase [Ipomoea triloba]	sp|Q7TMR0|PCP_MOUSE	Lysosomal Pro-X carboxypeptidase OS=Mus musculus OX=10090 GN=Prcp PE=1 SV=2	PF05577.13;PF12146.9	Peptidase_S28;Hydrolase_4	Serine carboxypeptidase S28;Serine aminopeptidase, S33
g59454	1.7435e-62	1.3194	0.353	0.146	3.33636e-58								ENOG4111HBZ	S:Function unknown	XP_031128055.1	probable plastid-lipid-associated protein 4, chloroplastic [Ipomoea triloba]	sp|Q9LU85|PAP4_ARATH	Probable plastid-lipid-associated protein 4, chloroplastic OS=Arabidopsis thaliana OX=3702 GN=PAP4 PE=1 SV=1	PF04755.13	PAP_fibrillin	PAP_fibrillin
g32106	0	1.31895	0.985	0.643	0	GO:0009579;GO:0016857;GO:0009535;GO:0005975;GO:0009941;GO:0009570;GO:0010319;GO:0009624;GO:0048046;GO:0006098;GO:0009409;GO:0004750;GO:0046872;GO:0019253	cellular_component;molecular_function;cellular_component;biological_process;cellular_component;cellular_component;cellular_component;biological_process;cellular_component;biological_process;biological_process;molecular_function;molecular_function;biological_process	CC:thylakoid;MF:racemase and epimerase activity, acting on carbohydrates and derivatives;CC:chloroplast thylakoid membrane;BP:carbohydrate metabolic process;CC:chloroplast envelope;CC:chloroplast stroma;CC:stromule;BP:response to nematode;CC:apoplast;BP:pentose-phosphate shunt;BP:response to cold;MF:ribulose-phosphate 3-epimerase activity;MF:metal ion binding;BP:reductive pentose-phosphate cycle	K01783	rpe, RPE	map00040;map00030;map00710	Pentose and glucuronate interconversions;Pentose phosphate pathway;Carbon fixation in photosynthetic organisms	COG0036	G:Carbohydrate transport and metabolism	XP_031091998.1	ribulose-phosphate 3-epimerase, chloroplastic [Ipomoea triloba]	sp|Q43843|RPE_SOLTU	Ribulose-phosphate 3-epimerase, chloroplastic (Fragment) OS=Solanum tuberosum OX=4113 PE=1 SV=1	PF00834.20	Ribul_P_3_epim	Ribulose-phosphate 3 epimerase family
g9137	4.9003e-83	1.31812	0.398	0.148	9.37722e-79								ENOG4111IAE	S:Function unknown	XP_031111102.1	probable plastid-lipid-associated protein 11, chloroplastic isoform X1 [Ipomoea triloba]	sp|O81304|PAP11_ARATH	Probable plastid-lipid-associated protein 11, chloroplastic OS=Arabidopsis thaliana OX=3702 GN=PAP11 PE=2 SV=1	PF04755.13	PAP_fibrillin	PAP_fibrillin
g332	8.53581e-96	1.31704	0.458	0.173	1.63341e-91	GO:0016021;GO:0050660;GO:0016491	cellular_component;molecular_function;molecular_function	CC:integral component of membrane;MF:flavin adenine dinucleotide binding;MF:oxidoreductase activity	K08232	E1.6.5.4	map00053	Ascorbate and aldarate metabolism	COG0446	J:Translation, ribosomal structure and biogenesis	XP_031116349.1	monodehydroascorbate reductase 4, peroxisomal-like [Ipomoea triloba]	sp|Q9LK94|MDAR4_ARATH	Monodehydroascorbate reductase 4, peroxisomal OS=Arabidopsis thaliana OX=3702 GN=MDAR4 PE=1 SV=1	PF07992.15;PF00249.32;PF13921.7;PF00070.28;PF13738.7	Pyr_redox_2;Myb_DNA-binding;Myb_DNA-bind_6;Pyr_redox;Pyr_redox_3	Pyridine nucleotide-disulphide oxidoreductase;Myb-like DNA-binding domain;Myb-like DNA-binding domain;Pyridine nucleotide-disulphide oxidoreductase;Pyridine nucleotide-disulphide oxidoreductase
g13592	3.79154e-251	1.31563	0.92	0.548	7.25548e-247				K18730	GIGYF			ENOG41120EC	S:Function unknown	XP_031096565.1	protein ESSENTIAL FOR POTEXVIRUS ACCUMULATION 1-like isoform X2 [Ipomoea triloba]	sp|Q9ASS6|PNSL5_ARATH	Photosynthetic NDH subunit of lumenal location 5, chloroplastic OS=Arabidopsis thaliana OX=3702 GN=PNSL5 PE=1 SV=1	PF00160.22;PF02213.17	Pro_isomerase;GYF	Cyclophilin type peptidyl-prolyl cis-trans isomerase/CLD;GYF domain
g52957	7.78691e-71	1.31451	0.351	0.13	1.4901e-66	GO:0003755;GO:0009507	molecular_function;cellular_component	MF:peptidyl-prolyl cis-trans isomerase activity;CC:chloroplast	K03768	PPIB, ppiB			COG0652	S:Function unknown	XP_031104754.1	peptidyl-prolyl cis-trans isomerase CYP26-2, chloroplastic [Ipomoea triloba]	sp|F4HTT6|CP26B_ARATH	Peptidyl-prolyl cis-trans isomerase CYP26-2, chloroplastic OS=Arabidopsis thaliana OX=3702 GN=CYP26-2 PE=2 SV=1	PF00160.22	Pro_isomerase	Cyclophilin type peptidyl-prolyl cis-trans isomerase/CLD
g59505	7.52677e-233	1.3136	0.852	0.398	1.44032e-228	GO:0009423;GO:0009534;GO:0003849;GO:0009507;GO:0009073	biological_process;cellular_component;molecular_function;cellular_component;biological_process	BP:chorismate biosynthetic process;CC:chloroplast thylakoid;MF:3-deoxy-7-phosphoheptulonate synthase activity;CC:chloroplast;BP:aromatic amino acid family biosynthetic process	K01626	E2.5.1.54, aroF, aroG, aroH	map00400	Phenylalanine, tyrosine and tryptophan biosynthesis	COG3200	S:Function unknown	XP_031128436.1	phospho-2-dehydro-3-deoxyheptonate aldolase 2, chloroplastic-like [Ipomoea triloba]	sp|Q00218|AROG_ARATH	Phospho-2-dehydro-3-deoxyheptonate aldolase 2, chloroplastic OS=Arabidopsis thaliana OX=3702 GN=DHS2 PE=2 SV=2	PF01474.17	DAHP_synth_2	Class-II DAHP synthetase family
g18506	6.90905e-176	1.31259	0.716	0.307	1.32212e-171	GO:0016853	molecular_function	MF:isomerase activity					ENOG410XQY4	S:Function unknown	XP_031093194.1	beta-carotene isomerase D27, chloroplastic [Ipomoea triloba]	sp|C7AU21|D27_ORYSJ	Beta-carotene isomerase D27, chloroplastic OS=Oryza sativa subsp. japonica OX=39947 GN=D27 PE=1 SV=1	PF13225.7	DUF4033	Domain of unknown function (DUF4033
g50602	2.48722e-77	1.31223	0.375	0.138	4.75955e-73	GO:0006355;GO:0009507;GO:0003723;GO:0006353	biological_process;cellular_component;molecular_function;biological_process	BP:regulation of transcription, DNA-templated;CC:chloroplast;MF:RNA binding;BP:DNA-templated transcription, termination	BP:regulation of transcription, DNA-templated;CC:chloroplast;MF:RNA binding;BP:DNA-templated transcription, termination				ENOG410YCTB	S:Function unknown	XP_031121362.1	uncharacterized protein LOC116024585 isoform X1 [Ipomoea triloba]			PF01029.19	NusB	NusB family
g54350	0	1.31218	0.991	0.776	0	GO:0009535;GO:0016168;GO:0009522;GO:0009523;GO:0016021;GO:0018298;GO:0009765	cellular_component;molecular_function;cellular_component;cellular_component;cellular_component;biological_process;biological_process	CC:chloroplast thylakoid membrane;MF:chlorophyll binding;CC:photosystem I;CC:photosystem II;CC:integral component of membrane;BP:protein-chromophore linkage;BP:photosynthesis, light harvesting	K08909	LHCA3	map00196	Photosynthesis - antenna proteins	ENOG410ZM8E	S:Function unknown	XP_031104951.1	chlorophyll a-b binding protein 8, chloroplastic [Ipomoea triloba]	sp|P27522|CB13_SOLLC	Chlorophyll a-b binding protein 8, chloroplastic OS=Solanum lycopersicum OX=4081 GN=CAB8 PE=3 SV=1	PF00504.22	Chloroa_b-bind	Chlorophyll A-B binding protein
g54465	1.73376e-214	1.30989	0.794	0.342	3.31772e-210	GO:0006782;GO:0015995;GO:0004853;GO:0009507	biological_process;biological_process;molecular_function;cellular_component	BP:protoporphyrinogen IX biosynthetic process;BP:chlorophyll biosynthetic process;MF:uroporphyrinogen decarboxylase activity;CC:chloroplast	K01599	hemE, UROD	map00860	Porphyrin and chlorophyll metabolism	COG0407	K:Transcription	XP_031104858.1	uroporphyrinogen decarboxylase, chloroplastic [Ipomoea triloba]	sp|Q42967|DCUP_TOBAC	Uroporphyrinogen decarboxylase, chloroplastic OS=Nicotiana tabacum OX=4097 GN=DCUP PE=1 SV=1	PF01208.18	URO-D	Uroporphyrinogen decarboxylase (URO-D
g28548	1.13335e-76	1.30987	0.386	0.146	2.16879e-72	GO:0016021;GO:0005783;GO:0016491	cellular_component;cellular_component;molecular_function	CC:integral component of membrane;CC:endoplasmic reticulum;MF:oxidoreductase activity					COG1028	K:Transcription	XP_031109938.1	short-chain dehydrogenase RED1-like [Ipomoea triloba]	sp|Q09851|AYR1_SCHPO	NADPH-dependent 1-acyldihydroxyacetone phosphate reductase OS=Schizosaccharomyces pombe (strain 972 / ATCC 24843) OX=284812 GN=ayr1 PE=3 SV=2	PF00106.26;PF13561.7;PF01370.22;PF08659.11;PF16363.6;PF13460.7;PF08643.11	adh_short;adh_short_C2;Epimerase;KR;GDP_Man_Dehyd;NAD_binding_10;DUF1776	short chain dehydrogenase;Enoyl-(Acyl carrier protein) reductase;NAD dependent epimerase/dehydratase family;KR domain;GDP-mannose 4,6 dehydratase;NAD(P)H-binding;Fungal family of unknown function (DUF1776
g29818	5.04539e-55	1.30776	0.316	0.128	9.65486e-51	GO:0004842;GO:0005524;GO:0004672	molecular_function;molecular_function;molecular_function	MF:ubiquitin-protein transferase activity;MF:ATP binding;MF:protein kinase activity					ENOG410XV39	O:Posttranslational modification, protein turnover, chaperones	XP_031108191.1	putative U-box domain-containing protein 50 isoform X2 [Ipomoea triloba]	sp|Q9FGD7|PUB50_ARATH	Putative U-box domain-containing protein 50 OS=Arabidopsis thaliana OX=3702 GN=PUB50 PE=3 SV=1	PF07714.18;PF00069.26;PF04564.16	PK_Tyr_Ser-Thr;Pkinase;U-box	Protein tyrosine and serine/threonine kinase;Protein kinase domain;U-box domain
g33877	2.31213e-122	1.30668	0.542	0.206	4.42449e-118	GO:0015986;GO:0046933	biological_process;molecular_function	BP:ATP synthesis coupled proton transport;MF:proton-transporting ATP synthase activity, rotational mechanism					COG0712	I:Lipid transport and metabolism	XP_031093003.1	ATP synthase delta chain, chloroplastic [Ipomoea triloba]			PF00213.19	OSCP	ATP synthase delta (OSCP) subunit
g42372	1.67841e-62	1.304	0.338	0.132	3.2118e-58	GO:0045454;GO:0016209;GO:0005623;GO:0016491	biological_process;molecular_function;cellular_component;molecular_function	BP:cell redox homeostasis;MF:antioxidant activity;CC:cell;MF:oxidoreductase activity					COG0526	C:Energy production and conversion	XP_031120957.1	uncharacterized protein LOC116024190 isoform X2 [Ipomoea triloba]			PF08534.11;PF00578.22	Redoxin;AhpC-TSA	Redoxin;AhpC/TSA family
g17181	9.01505e-90	1.30383	0.442	0.173	1.72512e-85	GO:0016021;GO:1990641	cellular_component;biological_process	CC:integral component of membrane;BP:response to iron ion starvation					ENOG411259N	S:Function unknown	XP_031093876.1	protein CONSERVED IN THE GREEN LINEAGE AND DIATOMS 27, chloroplastic [Ipomoea triloba]	sp|Q9FN15|GLD27_ARATH	Protein CONSERVED IN THE GREEN LINEAGE AND DIATOMS 27, chloroplastic OS=Arabidopsis thaliana OX=3702 GN=CGLD27 PE=2 SV=1	PF06799.12	DUF1230	Conserved in the green lineage and diatoms 27
g30155	3.22819e-217	1.30334	0.835	0.387	6.17746e-213	GO:0009535;GO:0009941;GO:0048564;GO:0009570;GO:0005634;GO:0098572;GO:0005739	cellular_component;cellular_component;biological_process;cellular_component;cellular_component;cellular_component;cellular_component	CC:chloroplast thylakoid membrane;CC:chloroplast envelope;BP:photosystem I assembly;CC:chloroplast stroma;CC:nucleus;CC:stromal side of plastid thylakoid membrane;CC:mitochondrion					ENOG4111QT7	S:Function unknown	XP_031109638.1	photosystem I assembly factor PSA3, chloroplastic [Ipomoea triloba]	sp|Q9M3C6|PSA3C_ARATH	Photosystem I assembly factor PSA3, chloroplastic OS=Arabidopsis thaliana OX=3702 GN=PSA3 PE=1 SV=1
g54397	9.48658e-296	1.30276	0.954	0.543	1.81535e-291	GO:0015996;GO:0009535;GO:0010207;GO:0009707;GO:0010319;GO:0009941;GO:0009570;GO:0016021;GO:2000070;GO:0009528;GO:1903426;GO:0045038;GO:0009527;GO:0010182;GO:0010027;GO:1902458;GO:0045037	biological_process;cellular_component;biological_process;cellular_component;cellular_component;cellular_component;cellular_component;cellular_component;biological_process;cellular_component;biological_process;biological_process;cellular_component;biological_process;biological_process;biological_process;biological_process	BP:chlorophyll catabolic process;CC:chloroplast thylakoid membrane;BP:photosystem II assembly;CC:chloroplast outer membrane;CC:stromule;CC:chloroplast envelope;CC:chloroplast stroma;CC:integral component of membrane;BP:regulation of response to water deprivation;CC:plastid inner membrane;BP:regulation of reactive oxygen species biosynthetic process;BP:protein import into chloroplast thylakoid mem…					ENOG4111FQD	S:Function unknown	XP_031101014.1	protein THYLAKOID FORMATION1, chloroplastic [Ipomoea triloba]	sp|Q7XAB8|THF1_SOLTU	Protein THYLAKOID FORMATION1, chloroplastic OS=Solanum tuberosum OX=4113 GN=THF1 PE=2 SV=1	PF11264.9	ThylakoidFormat	Thylakoid formation protein
g27011	9.63913e-100	1.30247	0.443	0.159	1.84454e-95	GO:0009534;GO:0016021;GO:0015995;GO:0046408	cellular_component;cellular_component;biological_process;molecular_function	CC:chloroplast thylakoid;CC:integral component of membrane;BP:chlorophyll biosynthetic process;MF:chlorophyll synthetase activity	K04040	chlG, bchG	map00860	Porphyrin and chlorophyll metabolism	COG0382	H:Coenzyme transport and metabolism	XP_031107170.1	chlorophyll synthase, chloroplastic-like [Ipomoea triloba]	sp|Q5W6H5|CHLG_ORYSJ	Chlorophyll synthase, chloroplastic OS=Oryza sativa subsp. japonica OX=39947 GN=CHLG PE=2 SV=1	PF01040.19	UbiA	UbiA prenyltransferase family
g48023	1.83881e-60	1.30207	0.306	0.112	3.51875e-56	GO:0003700;GO:0005634;GO:0046872;GO:0003676	molecular_function;cellular_component;molecular_function;molecular_function	MF:transcription factor activity, sequence-specific DNA binding;CC:nucleus;MF:metal ion binding;MF:nucleic acid binding	MF:transcription factor activity, sequence-specific DNA binding;CC:nucleus;MF:metal ion binding;MF:nucleic acid binding				COG5048	S:Function unknown	XP_031122871.1	zinc finger protein BALDIBIS-like [Ipomoea triloba]	sp|Q944L3|IDD9_ARATH	Zinc finger protein BALDIBIS OS=Arabidopsis thaliana OX=3702 GN=BIB PE=1 SV=1	PF12171.9;PF00096.27	zf-C2H2_jaz;zf-C2H2	Zinc-finger double-stranded RNA-binding;Zinc finger, C2H2 type
g9078	9.25894e-240	1.30206	0.895	0.472	1.77179e-235	GO:0009536;GO:0006457;GO:0051085;GO:0051087;GO:0051082;GO:0005759;GO:0046872;GO:0009507	cellular_component;biological_process;biological_process;molecular_function;molecular_function;cellular_component;molecular_function;cellular_component	CC:plastid;BP:protein folding;BP:chaperone mediated protein folding requiring cofactor;MF:chaperone binding;MF:unfolded protein binding;CC:mitochondrial matrix;MF:metal ion binding;CC:chloroplast	K04078	groES, HSPE1			COG0234	S:Function unknown	XP_031111280.1	10 kDa chaperonin 1, chloroplastic [Ipomoea triloba]	sp|Q9M1C2|CH101_ARATH	10 kDa chaperonin 1, chloroplastic OS=Arabidopsis thaliana OX=3702 GN=CPN10-1 PE=2 SV=1	PF00166.22	Cpn10	Chaperonin 10 Kd subunit
g15692	2.67434e-122	1.30181	0.582	0.242	5.11762e-118	GO:0009941;GO:0019538;GO:0009570;GO:0043424;GO:0008233;GO:0005524	cellular_component;biological_process;cellular_component;molecular_function;molecular_function;molecular_function	CC:chloroplast envelope;BP:protein metabolic process;CC:chloroplast stroma;MF:protein histidine kinase binding;MF:peptidase activity;MF:ATP binding					ENOG410YNK7	O:Posttranslational modification, protein turnover, chaperones	XP_031098297.1	ATP-dependent Clp protease ATP-binding subunit CLPT2, chloroplastic-like [Ipomoea triloba]	sp|Q8GW78|CLPT2_ARATH	ATP-dependent Clp protease ATP-binding subunit CLPT2, chloroplastic OS=Arabidopsis thaliana OX=3702 GN=CLPT2 PE=1 SV=1	PF02861.21	Clp_N	Clp amino terminal domain, pathogenicity island component
g11793	6.27381e-72	1.29779	0.384	0.153	1.20056e-67	GO:0030956;GO:0050567;GO:0005739;GO:0016740;GO:0006450;GO:0005524;GO:0032543;GO:0070681;GO:0009507	cellular_component;molecular_function;cellular_component;molecular_function;biological_process;molecular_function;biological_process;biological_process;cellular_component	CC:glutamyl-tRNA(Gln) amidotransferase complex;MF:glutaminyl-tRNA synthase (glutamine-hydrolyzing) activity;CC:mitochondrion;MF:transferase activity;BP:regulation of translational fidelity;MF:ATP binding;BP:mitochondrial translation;BP:glutaminyl-tRNAGln biosynthesis via transamidation;CC:chloroplast	K02435	gatC, GATC	map00970	Aminoacyl-tRNA biosynthesis	ENOG410YK7T	S:Function unknown	XP_019163691.1	PREDICTED: glutamyl-tRNA(Gln) amidotransferase subunit C, chloroplastic/mitochondrial [Ipomoea nil]	sp|D7STK2|GATC_VITVI	Glutamyl-tRNA(Gln) amidotransferase subunit C, chloroplastic/mitochondrial OS=Vitis vinifera OX=29760 GN=GATC PE=3 SV=1	PF02686.16	Glu-tRNAGln	Glu-tRNAGln amidotransferase C subunit
g37262	3.9227e-111	1.29573	0.549	0.228	7.50647e-107	GO:0004739;GO:0006086	molecular_function;biological_process	MF:pyruvate dehydrogenase (acetyl-transferring) activity;BP:acetyl-CoA biosynthetic process from pyruvate	K00162	PDHB, pdhB	map00020;map00010;map00620	Citrate cycle (TCA cycle;Glycolysis / Gluconeogenesis;Pyruvate metabolism	COG0022	C:Energy production and conversion	XP_031129664.1	pyruvate dehydrogenase E1 component subunit beta-3, chloroplastic [Ipomoea triloba]	sp|O64688|ODPB3_ARATH	Pyruvate dehydrogenase E1 component subunit beta-3, chloroplastic OS=Arabidopsis thaliana OX=3702 GN=E1-BETA-2 PE=2 SV=1	PF02780.21;PF02779.25	Transketolase_C;Transket_pyr	Transketolase, C-terminal domain;Transketolase, pyrimidine binding domain
g30850	1.60383e-285	1.29541	0.969	0.601	3.06909e-281	GO:0010207	biological_process	BP:photosystem II assembly	K08902	psb27	map00195	Photosynthesis	ENOG4111SBP	G:Carbohydrate transport and metabolism	XP_019158755.1	PREDICTED: photosystem II repair protein PSB27-H1, chloroplastic [Ipomoea nil]	sp|Q9LR64|PB27A_ARATH	Photosystem II repair protein PSB27-H1, chloroplastic OS=Arabidopsis thaliana OX=3702 GN=PSB27-1 PE=1 SV=1	PF13326.7	PSII_Pbs27	Photosystem II Pbs27
g54857	7.77967e-93	1.29201	0.508	0.219	1.48872e-88	GO:0016021	cellular_component	CC:integral component of membrane					ENOG41114YU	S:Function unknown	XP_031103588.1	36.4 kDa proline-rich protein-like [Ipomoea triloba]	sp|Q00451|PRF1_SOLLC	36.4 kDa proline-rich protein OS=Solanum lycopersicum OX=4081 GN=TPRP-F1 PE=2 SV=1	PF14547.7;PF00234.23;PF14368.7	Hydrophob_seed;Tryp_alpha_amyl;LTP_2	Hydrophobic seed protein;Protease inhibitor/seed storage/LTP family;Probable lipid transfer
g61672	4.49602e-176	1.29165	0.732	0.315	8.60358e-172	GO:0009941;GO:0045454;GO:0005623;GO:0009570	cellular_component;biological_process;cellular_component;cellular_component	CC:chloroplast envelope;BP:cell redox homeostasis;CC:cell;CC:chloroplast stroma					COG0526	I:Lipid transport and metabolism	XP_031103522.1	thioredoxin-like protein CDSP32, chloroplastic [Ipomoea triloba]	sp|Q9SGS4|CDSP_ARATH	Thioredoxin-like protein CDSP32, chloroplastic OS=Arabidopsis thaliana OX=3702 GN=CDSP32 PE=1 SV=1	PF00085.21;PF13905.7;PF13899.7	Thioredoxin;Thioredoxin_8;Thioredoxin_7	Thioredoxin;Thioredoxin-like;Thioredoxin-like
g29483	3.16027e-126	1.28944	0.597	0.247	6.04749e-122	GO:0016844;GO:0009058	molecular_function;biological_process	MF:strictosidine synthase activity;BP:biosynthetic process					COG3386	G:Carbohydrate transport and metabolism	XP_031109242.1	protein STRICTOSIDINE SYNTHASE-LIKE 6-like [Ipomoea triloba]	sp|Q9SD05|SSL6_ARATH	Protein STRICTOSIDINE SYNTHASE-LIKE 6 OS=Arabidopsis thaliana OX=3702 GN=SSL6 PE=2 SV=1	PF03088.17;PF08450.13	Str_synth;SGL	Strictosidine synthase;SMP-30/Gluconolactonase/LRE-like region
g25698	1.59209e-84	1.28907	0.431	0.173	3.04662e-80	GO:0031969;GO:0016021;GO:0006631	cellular_component;cellular_component;biological_process	CC:chloroplast membrane;CC:integral component of membrane;BP:fatty acid metabolic process					ENOG4111JJH	S:Function unknown	XP_031107527.1	uncharacterized protein LOC116012185 [Ipomoea triloba]			PF11833.9	CPP1-like	Protein CHAPERONE-LIKE PROTEIN OF POR1-like
g19337	2.11688e-113	1.2873	0.507	0.189	4.05086e-109	GO:0071555;GO:0016021;GO:0005576;GO:0005975;GO:0004650	biological_process;cellular_component;cellular_component;biological_process;molecular_function	BP:cell wall organization;CC:integral component of membrane;CC:extracellular region;BP:carbohydrate metabolic process;MF:polygalacturonase activity					ENOG410ZW88	S:Function unknown	XP_031094060.1	uncharacterized protein LOC115998595 [Ipomoea triloba]			PF11317.9	DUF3119	Protein of unknown function (DUF3119
g43049	9.4814e-96	1.28715	0.468	0.183	1.81436e-91	GO:0005737;GO:0010581;GO:0009570;GO:0005623;GO:0019430;GO:0016671;GO:0042744;GO:0008047;GO:0010380;GO:0045454;GO:0042802;GO:0004791	cellular_component;biological_process;cellular_component;cellular_component;biological_process;molecular_function;biological_process;molecular_function;biological_process;biological_process;molecular_function;molecular_function	CC:cytoplasm;BP:regulation of starch biosynthetic process;CC:chloroplast stroma;CC:cell;BP:removal of superoxide radicals;MF:oxidoreductase activity, acting on a sulfur group of donors, disulfide as acceptor;BP:hydrogen peroxide catabolic process;MF:enzyme activator activity;BP:regulation of chlorophyll biosynthetic process;BP:cell redox homeostasis;MF:identical protein binding;MF:thioredoxin-dis…	K00384	trxB, TRR	map00450	Selenocompound metabolism	COG0492	S:Function unknown	XP_031131101.1	thioredoxin reductase NTRC [Ipomoea triloba]	sp|Q70G58|NTRC_ORYSJ	Thioredoxin reductase NTRC OS=Oryza sativa subsp. japonica OX=39947 GN=Os07g0657900 PE=1 SV=2	PF07992.15;PF13738.7;PF00070.28;PF00085.21;PF00890.25;PF12831.8;PF00462.25;PF05768.15;PF13450.7;PF13098.7;PF01946.18	Pyr_redox_2;Pyr_redox_3;Pyr_redox;Thioredoxin;FAD_binding_2;FAD_oxidored;Glutaredoxin;DUF836;NAD_binding_8;Thioredoxin_2;Thi4	Pyridine nucleotide-disulphide oxidoreductase;Pyridine nucleotide-disulphide oxidoreductase;Pyridine nucleotide-disulphide oxidoreductase;Thioredoxin;FAD binding domain;FAD dependent oxidoreductase;Glutaredoxin;Glutaredoxin-like domain (DUF836;NAD(P)-binding Rossmann-like domain;Thioredoxin-like domain;Thi4 family
g58903	4.02365e-128	1.28625	0.593	0.247	7.69966e-124	GO:0005737;GO:0042132;GO:0005975;GO:0030388;GO:0005986;GO:0006000;GO:0006002;GO:0006094	cellular_component;molecular_function;biological_process;biological_process;biological_process;biological_process;biological_process;biological_process	CC:cytoplasm;MF:fructose 1,6-bisphosphate 1-phosphatase activity;BP:carbohydrate metabolic process;BP:fructose 1,6-bisphosphate metabolic process;BP:sucrose biosynthetic process;BP:fructose metabolic process;BP:fructose 6-phosphate metabolic process;BP:gluconeogenesis	K03841	FBP, fbp	map00010;map00030;map00051;map00710	Glycolysis / Gluconeogenesis;Pentose phosphate pathway;Fructose and mannose metabolism;Carbon fixation in photosynthetic organisms	COG0158	S:Function unknown	XP_031128891.1	fructose-1,6-bisphosphatase, chloroplastic-like [Ipomoea triloba]	sp|P25851|F16P1_ARATH	Fructose-1,6-bisphosphatase 1, chloroplastic OS=Arabidopsis thaliana OX=3702 GN=CFBP1 PE=1 SV=2	PF00316.21;PF18913.1	FBPase;FBPase_C	Fructose-1-6-bisphosphatase, N-terminal domain;Fructose-1-6-bisphosphatase, C-terminal domain
g26761	1.032e-183	1.28577	0.746	0.318	1.97484e-179				K03255	TIF31, CLU1			ENOG410XQUQ	S:Function unknown	XP_031108873.1	protein TSS isoform X2 [Ipomoea triloba]	sp|F4JKH6|TSS_ARATH	Protein TSS OS=Arabidopsis thaliana OX=3702 GN=TSS PE=1 SV=1	PF12807.8;PF13424.7;PF13374.7;PF07719.18;PF17874.2	eIF3_p135;TPR_12;TPR_10;TPR_2;TPR_MalT	Translation initiation factor eIF3 subunit 135;Tetratricopeptide repeat;Tetratricopeptide repeat;Tetratricopeptide repeat;MalT-like TPR region
g42779	1.01435e-114	1.28531	0.523	0.205	1.94106e-110	GO:0032955;GO:0051301	biological_process;biological_process	BP:regulation of barrier septum assembly;BP:cell division					ENOG41122SR	S:Function unknown	XP_031116496.1	cell division topological specificity factor homolog, chloroplastic-like [Ipomoea triloba]	sp|Q9C4Z7|MINE1_ARATH	Cell division topological specificity factor homolog, chloroplastic OS=Arabidopsis thaliana OX=3702 GN=MINE1 PE=1 SV=1
g53807	9.05633e-84	1.28412	0.49	0.217	1.73302e-79	GO:0008233;GO:0030163	molecular_function;biological_process	MF:peptidase activity;BP:protein catabolic process	K06891	clpS			COG2127	O:Posttranslational modification, protein turnover, chaperones	XP_031104516.1	ATP-dependent Clp protease adapter protein CLPS1, chloroplastic-like [Ipomoea triloba]	sp|Q9SX29|CLPS1_ARATH	ATP-dependent Clp protease adapter protein CLPS1, chloroplastic OS=Arabidopsis thaliana OX=3702 GN=CPLS1 PE=1 SV=1	PF02617.18	ClpS	ATP-dependent Clp protease adaptor protein ClpS
g24401	4.24049e-169	1.28333	0.689	0.279	8.11459e-165	GO:0016021	cellular_component	CC:integral component of membrane					ENOG4111KCW	M:Cell wall/membrane/envelope biogenesis	XP_031102184.1	protein FLUORESCENT IN BLUE LIGHT, chloroplastic-like isoform X1 [Ipomoea triloba]	sp|Q940U6|FLU_ARATH	Protein FLUORESCENT IN BLUE LIGHT, chloroplastic OS=Arabidopsis thaliana OX=3702 GN=FLU PE=1 SV=1	PF13424.7;PF00515.29;PF13176.7;PF13181.7;PF13432.7;PF07719.18;PF14559.7	TPR_12;TPR_1;TPR_7;TPR_8;TPR_16;TPR_2;TPR_19	Tetratricopeptide repeat;Tetratricopeptide repeat;Tetratricopeptide repeat;Tetratricopeptide repeat;Tetratricopeptide repeat;Tetratricopeptide repeat;Tetratricopeptide repeat
g51349	2.80476e-120	1.28226	0.575	0.239	5.36718e-116	GO:0016021	cellular_component	CC:integral component of membrane					ENOG41120W7	E:Amino acid transport and metabolism	XP_031105826.1	uncharacterized protein LOC116010521 [Ipomoea triloba]	sp|Q06881|BCCP_NOSS1	Biotin carboxyl carrier protein of acetyl-CoA carboxylase OS=Nostoc sp. (strain PCC 7120 / SAG 25.82 / UTEX 2576) OX=103690 GN=accB PE=1 SV=2	PF00364.23;PF13533.7	Biotin_lipoyl;Biotin_lipoyl_2	Biotin-requiring enzyme;Biotin-lipoyl like
g13183	2.18008e-90	1.2814	0.429	0.16	4.1718e-86	GO:0008168;GO:0016021;GO:0032259	molecular_function;cellular_component;biological_process	MF:methyltransferase activity;CC:integral component of membrane;BP:methylation	K12502	VTE3, APG1	map00130	Ubiquinone and other terpenoid-quinone biosynthesis	COG0500	S:Function unknown	XP_031098498.1	2-methyl-6-phytyl-1,4-hydroquinone methyltransferase 1, chloroplastic-like [Ipomoea triloba]	sp|Q6ZLD3|BQMT1_ORYSJ	2-methyl-6-phytyl-1,4-hydroquinone methyltransferase 1, chloroplastic OS=Oryza sativa subsp. japonica OX=39947 GN=ARSM2 PE=2 SV=1	PF08241.13;PF13649.7;PF01209.19;PF13847.7	Methyltransf_11;Methyltransf_25;Ubie_methyltran;Methyltransf_31	Methyltransferase domain;Methyltransferase domain;ubiE/COQ5 methyltransferase family;Methyltransferase domain
g64097	9.2394e-268	1.28029	0.92	0.463	1.76805e-263	GO:0016021	cellular_component	CC:integral component of membrane					ENOG4111CP0	S:Function unknown	XP_031119479.1	uncharacterized protein LOC116022759 [Ipomoea triloba]			PF01190.18	Pollen_Ole_e_1	Pollen protein Ole e 1 like
g29087	2.5806e-99	1.27965	0.461	0.176	4.93823e-95	GO:0003735;GO:0000027;GO:0022625;GO:0006412;GO:0005840	molecular_function;biological_process;cellular_component;biological_process;cellular_component	MF:structural constituent of ribosome;BP:ribosomal large subunit assembly;CC:cytosolic large ribosomal subunit;BP:translation;CC:ribosome	K02893	RP-L23Ae, RPL23A	map03010	Ribosome	COG0089	K:Transcription	XP_031107095.1	uncharacterized protein LOC116011819 [Ipomoea triloba]	sp|O22644|RL23A_FRIAG	60S ribosomal protein L23A OS=Fritillaria agrestis OX=64177 GN=RPL23A PE=2 SV=1	PF00276.21	Ribosomal_L23	Ribosomal protein L23
g58990	2.02345e-112	1.27949	0.511	0.196	3.87208e-108	GO:0016301;GO:0009507	molecular_function;cellular_component	MF:kinase activity;CC:chloroplast					ENOG410XSXA	S:Function unknown	XP_031126264.1	probable inactive shikimate kinase like 2, chloroplastic [Ipomoea triloba]	sp|O82290|SKL2_ARATH	Probable inactive shikimate kinase like 2, chloroplastic OS=Arabidopsis thaliana OX=3702 GN=SKL2 PE=2 SV=2	PF04969.17;PF01202.23	CS;SKI	CS domain;Shikimate kinase
g23932	3.21747e-93	1.27847	0.526	0.235	6.15694e-89	GO:0016021;GO:0043953	cellular_component;biological_process	CC:integral component of membrane;BP:protein transport by the Tat complex	K03116	tatA	map03060	Protein export	COG1826	U:Intracellular trafficking, secretion, and vesicular transport	XP_031101700.1	sec-independent protein translocase protein TATA, chloroplastic-like [Ipomoea triloba]	sp|Q9XH46|TATA_PEA	Sec-independent protein translocase protein TATA, chloroplastic OS=Pisum sativum OX=3888 GN=TATA PE=1 SV=1	PF02416.17	TatA_B_E	mttA/Hcf106 family
g60970	1.62362e-197	1.27747	0.842	0.407	3.10697e-193	GO:0048046;GO:0005618;GO:0030145;GO:0045735;GO:0009734	cellular_component;cellular_component;molecular_function;molecular_function;biological_process	CC:apoplast;CC:cell wall;MF:manganese ion binding;MF:nutrient reservoir activity;BP:auxin-activated signaling pathway					ENOG410YB6M	S:Function unknown	XP_031118291.1	germin-like protein [Ipomoea triloba]	sp|O04011|ABP20_PRUPE	Auxin-binding protein ABP20 OS=Prunus persica OX=3760 GN=ABP20 PE=2 SV=1	PF00190.23;PF07883.12	Cupin_1;Cupin_2	Cupin;Cupin domain
g41630	6.97935e-95	1.27645	0.492	0.202	1.33557e-90	GO:0070181;GO:0005840;GO:0019843;GO:0003735;GO:0006412;GO:0022627	molecular_function;cellular_component;molecular_function;molecular_function;biological_process;cellular_component	MF:small ribosomal subunit rRNA binding;CC:ribosome;MF:rRNA binding;MF:structural constituent of ribosome;BP:translation;CC:cytosolic small ribosomal subunit					COG0360	O:Posttranslational modification, protein turnover, chaperones	XP_031112324.1	prostatic spermine-binding protein isoform X1 [Ipomoea triloba]	sp|A5EXN1|RS6_DICNV	30S ribosomal protein S6 OS=Dichelobacter nodosus (strain VCS1703A) OX=246195 GN=rpsF PE=3 SV=1	PF01250.18	Ribosomal_S6	Ribosomal protein S6
g50488	2.61202e-83	1.27263	0.385	0.134	4.99836e-79	GO:0016787;GO:0005525	molecular_function;molecular_function	MF:hydrolase activity;MF:GTP binding	K03978	engB			COG0218	S:Function unknown	XP_031121437.1	GTP-binding protein At2g22870 [Ipomoea triloba]	sp|O81004|Y2287_ARATH	GTP-binding protein At2g22870 OS=Arabidopsis thaliana OX=3702 GN=EMB2001 PE=2 SV=2	PF01926.24;PF03193.17;PF02421.19;PF00350.24	MMR_HSR1;RsgA_GTPase;FeoB_N;Dynamin_N	50S ribosome-binding GTPase;RsgA GTPase;Ferrous iron transport protein B;Dynamin family
g10265	7.17588e-101	1.27195	0.548	0.246	1.37318e-96	GO:0009579;GO:0048046;GO:0022626;GO:0009941;GO:0045041;GO:0009570;GO:0005829;GO:0006458;GO:0005739;GO:0009658;GO:0009793;GO:0042026;GO:0051082;GO:0005524	cellular_component;cellular_component;cellular_component;cellular_component;biological_process;cellular_component;cellular_component;biological_process;cellular_component;biological_process;biological_process;biological_process;molecular_function;molecular_function	CC:thylakoid;CC:apoplast;CC:cytosolic ribosome;CC:chloroplast envelope;BP:protein import into mitochondrial intermembrane space;CC:chloroplast stroma;CC:cytosol;BP:'de novo' protein folding;CC:mitochondrion;BP:chloroplast organization;BP:embryo development ending in seed dormancy;BP:protein refolding;MF:unfolded protein binding;MF:ATP binding					COG0459	O:Posttranslational modification, protein turnover, chaperones	XP_031100536.1	ruBisCO large subunit-binding protein subunit alpha-like [Ipomoea triloba]	sp|P08926|RUBA_PEA	RuBisCO large subunit-binding protein subunit alpha, chloroplastic OS=Pisum sativum OX=3888 PE=1 SV=2	PF00118.25;PF13966.7	Cpn60_TCP1;zf-RVT	TCP-1/cpn60 chaperonin family;zinc-binding in reverse transcriptase
g497	2.8286e-139	1.27171	0.627	0.263	5.41281e-135	GO:0016021	cellular_component	CC:integral component of membrane	K22736	VIT			ENOG411298Q	S:Function unknown	XP_031115243.1	uncharacterized protein LOC116019235 [Ipomoea triloba]
g30995	1.02088e-181	1.27083	0.755	0.332	1.95355e-177	GO:0006220;GO:0006228;GO:0006163;GO:0006241;GO:0004550;GO:0005524;GO:0046872;GO:0006183;GO:0009507	biological_process;biological_process;biological_process;biological_process;molecular_function;molecular_function;molecular_function;biological_process;cellular_component	BP:pyrimidine nucleotide metabolic process;BP:UTP biosynthetic process;BP:purine nucleotide metabolic process;BP:CTP biosynthetic process;MF:nucleoside diphosphate kinase activity;MF:ATP binding;MF:metal ion binding;BP:GTP biosynthetic process;CC:chloroplast	K00940	ndk, NME	map00240;map04016;map00230	Pyrimidine metabolism;MAPK signaling pathway - plant;Purine metabolism	COG0105	F:Nucleotide transport and metabolism	XP_031092021.1	nucleoside diphosphate kinase 2, chloroplastic [Ipomoea triloba]	sp|Q852S5|NDK2_TOBAC	Nucleoside diphosphate kinase 2, chloroplastic OS=Nicotiana tabacum OX=4097 GN=NDPK2 PE=1 SV=1	PF00334.20	NDK	Nucleoside diphosphate kinase
g26774	1.55555e-201	1.26903	0.817	0.387	2.9767e-197	GO:0009507;GO:0032790;GO:0043022;GO:0003743	cellular_component;biological_process;molecular_function;molecular_function	CC:chloroplast;BP:ribosome disassembly;MF:ribosome binding;MF:translation initiation factor activity	K02520	infC, MTIF3			COG0290	J:Translation, ribosomal structure and biogenesis	XP_031109209.1	translation initiation factor IF3-4, chloroplastic-like [Ipomoea triloba]	sp|O82234|IF32_ARATH	Translation initiation factor IF3-2, chloroplastic OS=Arabidopsis thaliana OX=3702 GN=IF3-2 PE=2 SV=1	PF00707.23;PF05198.17	IF3_C;IF3_N	Translation initiation factor IF-3, C-terminal domain;Translation initiation factor IF-3, N-terminal domain
g38959	2.25989e-225	1.2687	0.876	0.45	4.32453e-221	GO:0006782;GO:0050661;GO:0008883	biological_process;molecular_function;molecular_function	BP:protoporphyrinogen IX biosynthetic process;MF:NADP binding;MF:glutamyl-tRNA reductase activity	K02492	hemA	map00860	Porphyrin and chlorophyll metabolism	COG0373	H:Coenzyme transport and metabolism	XP_031124945.1	glutamyl-tRNA reductase 1, chloroplastic-like [Ipomoea triloba]	sp|P93111|HEM11_CUCSA	Glutamyl-tRNA reductase 1, chloroplastic OS=Cucumis sativus OX=3659 GN=HEMA1 PE=2 SV=1	PF05201.16;PF00745.21;PF01488.21;PF03807.18;PF03446.16;PF03435.19;PF02254.19;PF02423.16;PF02826.20	GlutR_N;GlutR_dimer;Shikimate_DH;F420_oxidored;NAD_binding_2;Sacchrp_dh_NADP;TrkA_N;OCD_Mu_crystall;2-Hacid_dh_C	Glutamyl-tRNAGlu reductase, N-terminal domain;Glutamyl-tRNAGlu reductase, dimerisation domain;Shikimate / quinate 5-dehydrogenase;NADP oxidoreductase coenzyme F420-dependent;NAD binding domain of 6-phosphogluconate dehydrogenase;Saccharopine dehydrogenase NADP binding domain;TrkA-N domain;Ornithine cyclodeaminase/mu-crystallin family;D-isomer specific 2-hydroxyacid dehydrogenase, NAD binding doma…
g1634	5.78122e-64	1.26677	0.355	0.141	1.10629e-59	GO:0005975;GO:0005978;GO:0005829;GO:0000287;GO:0004614;GO:0016868;GO:0006006;GO:0019388;GO:0009507	biological_process;biological_process;cellular_component;molecular_function;molecular_function;molecular_function;biological_process;biological_process;cellular_component	BP:carbohydrate metabolic process;BP:glycogen biosynthetic process;CC:cytosol;MF:magnesium ion binding;MF:phosphoglucomutase activity;MF:intramolecular transferase activity, phosphotransferases;BP:glucose metabolic process;BP:galactose catabolic process;CC:chloroplast	K01835	pgm	map00230;map00520;map00052;map00010;map00500;map00030	Purine metabolism;Amino sugar and nucleotide sugar metabolism;Galactose metabolism;Glycolysis / Gluconeogenesis;Starch and sucrose metabolism;Pentose phosphate pathway	COG0033	S:Function unknown	XP_031117101.1	phosphoglucomutase, chloroplastic [Ipomoea triloba]	sp|Q9M4G5|PGMP_SOLTU	Phosphoglucomutase, chloroplastic OS=Solanum tuberosum OX=4113 GN=PGMP PE=2 SV=1	PF02878.17;PF02880.17;PF02879.17;PF00408.21	PGM_PMM_I;PGM_PMM_III;PGM_PMM_II;PGM_PMM_IV	Phosphoglucomutase/phosphomannomutase, alpha/beta/alpha domain I;Phosphoglucomutase/phosphomannomutase, alpha/beta/alpha domain III;Phosphoglucomutase/phosphomannomutase, alpha/beta/alpha domain II;Phosphoglucomutase/phosphomannomutase, C-terminal domain
g58891	9.12887e-51	1.26666	0.285	0.112	1.7469e-46	GO:0016021	cellular_component	CC:integral component of membrane					ENOG410Z0PS	S:Function unknown	XP_031128310.1	uncharacterized protein LOC116030258 [Ipomoea triloba]
g49604	3.49632e-61	1.26388	0.365	0.154	6.69055e-57	GO:0031969;GO:1902478;GO:0016021;GO:0010228;GO:0009707;GO:0003824;GO:0034051;GO:0010027;GO:0005525	cellular_component;biological_process;cellular_component;biological_process;cellular_component;molecular_function;biological_process;biological_process;molecular_function	CC:chloroplast membrane;BP:negative regulation of defense response to bacterium, incompatible interaction;CC:integral component of membrane;BP:vegetative to reproductive phase transition of meristem;CC:chloroplast outer membrane;MF:catalytic activity;BP:negative regulation of plant-type hypersensitive response;BP:thylakoid membrane organization;MF:GTP binding					COG0699	S:Function unknown	XP_031122217.1	probable transmembrane GTPase FZO-like, chloroplastic [Ipomoea triloba]	sp|Q1KPV0|FZL_ARATH	Probable transmembrane GTPase FZO-like, chloroplastic OS=Arabidopsis thaliana OX=3702 GN=FZL PE=1 SV=1	PF00350.24;PF01926.24;PF02581.18;PF00009.28	Dynamin_N;MMR_HSR1;TMP-TENI;GTP_EFTU	Dynamin family;50S ribosome-binding GTPase;Thiamine monophosphate synthase;Elongation factor Tu GTP binding domain
g54885	1.65753e-168	1.26239	0.715	0.305	3.17185e-164	GO:0006633;GO:0009317;GO:0009507;GO:0003989	biological_process;cellular_component;cellular_component;molecular_function	BP:fatty acid biosynthetic process;CC:acetyl-CoA carboxylase complex;CC:chloroplast;MF:acetyl-CoA carboxylase activity	K02160	accB, bccP	map00640;map00061;map00620	Propanoate metabolism;Fatty acid biosynthesis;Pyruvate metabolism	COG0511	I:Lipid transport and metabolism	XP_031099614.1	biotin carboxyl carrier protein of acetyl-CoA carboxylase 1, chloroplastic-like [Ipomoea triloba]	sp|Q42533|BCCP1_ARATH	Biotin carboxyl carrier protein of acetyl-CoA carboxylase 1, chloroplastic OS=Arabidopsis thaliana OX=3702 GN=BCCP1 PE=1 SV=2	PF00364.23;PF13533.7;PF13375.7	Biotin_lipoyl;Biotin_lipoyl_2;RnfC_N	Biotin-requiring enzyme;Biotin-lipoyl like;RnfC Barrel sandwich hybrid domain
g30153	2.53321e-120	1.26127	0.557	0.228	4.84755e-116	GO:0003755	molecular_function	MF:peptidyl-prolyl cis-trans isomerase activity					COG0652	O:Posttranslational modification, protein turnover, chaperones	XP_031108253.1	peptidyl-prolyl cis-trans isomerase CYP38, chloroplastic-like [Ipomoea triloba]	sp|Q9SSA5|CYP38_ARATH	Peptidyl-prolyl cis-trans isomerase CYP38, chloroplastic OS=Arabidopsis thaliana OX=3702 GN=CYP38 PE=1 SV=1	PF00160.22	Pro_isomerase	Cyclophilin type peptidyl-prolyl cis-trans isomerase/CLD
g26780	8.95837e-89	1.25923	0.455	0.187	1.71427e-84	GO:0019898;GO:0009654;GO:0005509;GO:0015979	cellular_component;cellular_component;molecular_function;biological_process	CC:extrinsic component of membrane;CC:photosystem II oxygen evolving complex;MF:calcium ion binding;BP:photosynthesis					ENOG4111FF3	S:Function unknown	XP_031107786.1	psbP domain-containing protein 1, chloroplastic [Ipomoea triloba]	sp|O23403|PPD1_ARATH	PsbP domain-containing protein 1, chloroplastic OS=Arabidopsis thaliana OX=3702 GN=PPD1 PE=1 SV=1	PF01789.17;PF18933.1	PsbP;PsbP_2	PsbP;PsbP-like protein
g10027	4.62795e-218	1.25901	0.843	0.397	8.85605e-214	GO:0009535;GO:0090342;GO:0051205;GO:0032991;GO:0072598;GO:0016021;GO:0070208;GO:0032977;GO:0045038;GO:0019904;GO:0010027;GO:0042802	cellular_component;biological_process;biological_process;cellular_component;biological_process;cellular_component;biological_process;molecular_function;biological_process;molecular_function;biological_process;molecular_function	CC:chloroplast thylakoid membrane;BP:regulation of cell aging;BP:protein insertion into membrane;CC:macromolecular complex;BP:protein localization to chloroplast;CC:integral component of membrane;BP:protein heterotrimerization;MF:membrane insertase activity;BP:protein import into chloroplast thylakoid membrane;MF:protein domain specific binding;BP:thylakoid membrane organization;MF:identical prot…	K03217	yidC, spoIIIJ, OXA1, ccfA	map03060	Protein export	COG0706	L:Replication, recombination and repair	XP_031100741.1	inner membrane protein PPF-1, chloroplastic [Ipomoea triloba]	sp|Q9FY06|PPF1_PEA	Inner membrane protein PPF-1, chloroplastic OS=Pisum sativum OX=3888 GN=PPF-1 PE=2 SV=2	PF02096.21	60KD_IMP	60Kd inner membrane protein
g38683	1.1047e-157	1.25808	0.718	0.321	2.11395e-153	GO:0045454;GO:0003756;GO:0005623	biological_process;molecular_function;cellular_component	BP:cell redox homeostasis;MF:protein disulfide isomerase activity;CC:cell					COG5601	S:Function unknown	XP_019155834.1	PREDICTED: thioredoxin-like 4, chloroplastic [Ipomoea nil]	sp|Q9C5C5|TRL4_ARATH	Thioredoxin-like 4, chloroplastic OS=Arabidopsis thaliana OX=3702 GN=At1g07700 PE=2 SV=1	PF00085.21;PF13098.7	Thioredoxin;Thioredoxin_2	Thioredoxin;Thioredoxin-like domain
g59502	2.23906e-91	1.25773	0.47	0.189	4.28466e-87	GO:0006457;GO:0031072;GO:0051082;GO:0009408;GO:0046872;GO:0005524	biological_process;molecular_function;molecular_function;biological_process;molecular_function;molecular_function	BP:protein folding;MF:heat shock protein binding;MF:unfolded protein binding;BP:response to heat;MF:metal ion binding;MF:ATP binding	K03686	dnaJ			COG0484	O:Posttranslational modification, protein turnover, chaperones	XP_031128613.1	chaperone protein dnaJ A7A, chloroplastic-like [Ipomoea triloba]	sp|Q9SJZ7|DNJA6_ARATH	Chaperone protein dnaJ A6, chloroplastic OS=Arabidopsis thaliana OX=3702 GN=DJA6 PE=2 SV=2	PF01556.19;PF00226.32;PF00684.20	DnaJ_C;DnaJ;DnaJ_CXXCXGXG	DnaJ C terminal domain;DnaJ domain;DnaJ central domain
g58847	1.14602e-60	1.25432	0.334	0.128	2.19303e-56	GO:0009941;GO:0009706;GO:0045037	cellular_component;cellular_component;biological_process	CC:chloroplast envelope;CC:chloroplast inner membrane;BP:protein import into chloroplast stroma					ENOG4111F7B	S:Function unknown	XP_031128894.1	protein TIC 56, chloroplastic [Ipomoea triloba]	sp|Q7Y1W1|TIC56_ARATH	Protein TIC 56, chloroplastic OS=Arabidopsis thaliana OX=3702 GN=TIC56 PE=1 SV=1
g29422	1.68632e-66	1.25269	0.357	0.139	3.22694e-62								ENOG410YJAV	S:Function unknown	XP_031108145.1	uncharacterized protein LOC116012661 [Ipomoea triloba]			PF00582.27	Usp	Universal stress protein family
g60513	5.76006e-93	1.25122	0.486	0.203	1.10225e-88	GO:0005525	molecular_function	MF:GTP binding					COG0536	G:Carbohydrate transport and metabolism	XP_031118250.1	probable GTP-binding protein OBGC2 [Ipomoea triloba]	sp|Q851Q6|OBGC2_ORYSJ	Probable GTP-binding protein OBGC2 OS=Oryza sativa subsp. japonica OX=39947 GN=Os03g0799700 PE=2 SV=1	PF01926.24;PF01018.23;PF02421.19;PF00009.28;PF00025.22	MMR_HSR1;GTP1_OBG;FeoB_N;GTP_EFTU;Arf	50S ribosome-binding GTPase;GTP1/OBG;Ferrous iron transport protein B;Elongation factor Tu GTP binding domain;ADP-ribosylation factor family
g31082	1.96532e-58	1.2497	0.326	0.13	3.76083e-54	GO:0046422;GO:0015994;GO:0016491;GO:0010028;GO:0009507	molecular_function;biological_process;molecular_function;biological_process;cellular_component	MF:violaxanthin de-epoxidase activity;BP:chlorophyll metabolic process;MF:oxidoreductase activity;BP:xanthophyll cycle;CC:chloroplast	K09839	VDE, NPQ1	map00906	Carotenoid biosynthesis	ENOG410XRAI	I:Lipid transport and metabolism	XP_031092781.1	violaxanthin de-epoxidase, chloroplastic [Ipomoea triloba]	sp|Q40593|VDE_TOBAC	Violaxanthin de-epoxidase, chloroplastic OS=Nicotiana tabacum OX=4097 GN=VDE1 PE=2 SV=1	PF07137.12	VDE	VDE lipocalin domain
g9194	6.04479e-268	1.24946	0.949	0.58	1.15673e-263	GO:0004802;GO:0009535;GO:0005829;GO:0006098;GO:0046872;GO:0019253	molecular_function;cellular_component;cellular_component;biological_process;molecular_function;biological_process	MF:transketolase activity;CC:chloroplast thylakoid membrane;CC:cytosol;BP:pentose-phosphate shunt;MF:metal ion binding;BP:reductive pentose-phosphate cycle	K00615	E2.2.1.1, tktA, tktB	map00030;map00710	Pentose phosphate pathway;Carbon fixation in photosynthetic organisms	COG0021	O:Posttranslational modification, protein turnover, chaperones	XP_031111475.1	transketolase, chloroplastic [Ipomoea triloba]	sp|Q43848|TKTC_SOLTU	Transketolase, chloroplastic OS=Solanum tuberosum OX=4113 PE=2 SV=1	PF00456.22;PF02779.25;PF02780.21	Transketolase_N;Transket_pyr;Transketolase_C	Transketolase, thiamine diphosphate binding domain;Transketolase, pyrimidine binding domain;Transketolase, C-terminal domain
g28351	2.05658e-97	1.24849	0.478	0.185	3.93547e-93	GO:0042626;GO:0016021;GO:0016887;GO:0005886;GO:0055085;GO:0005524	molecular_function;cellular_component;molecular_function;cellular_component;biological_process;molecular_function	MF:ATPase activity, coupled to transmembrane movement of substances;CC:integral component of membrane;MF:ATPase activity;CC:plasma membrane;BP:transmembrane transport;MF:ATP binding	K05681	ABCG2, CD338	map02010	ABC transporters	COG1131	O:Posttranslational modification, protein turnover, chaperones	XP_031107598.1	ABC transporter G family member 5 [Ipomoea triloba]	sp|Q9SIT6|AB5G_ARATH	ABC transporter G family member 5 OS=Arabidopsis thaliana OX=3702 GN=ABCG5 PE=2 SV=1	PF01061.25;PF00005.28;PF19055.1;PF06422.13	ABC2_membrane;ABC_tran;ABC2_membrane_7;PDR_CDR	ABC-2 type transporter;ABC transporter;ABC-2 type transporter;CDR ABC transporter
g11686	3.72609e-77	1.24626	0.425	0.176	7.13025e-73								ENOG410Z0AY	S:Function unknown	XP_031099263.1	uncharacterized protein LOC116003512 [Ipomoea triloba]			PF03080.16;PF14365.7	Neprosin;Neprosin_AP	Neprosin;Neprosin activation peptide
g33780	1.228e-99	1.24493	0.481	0.185	2.34989e-95	GO:0008299;GO:0046872;GO:0070402;GO:0016853;GO:0030604	biological_process;molecular_function;molecular_function;molecular_function;molecular_function	BP:isoprenoid biosynthetic process;MF:metal ion binding;MF:NADPH binding;MF:isomerase activity;MF:1-deoxy-D-xylulose-5-phosphate reductoisomerase activity	K00099	dxr	map00900	Terpenoid backbone biosynthesis	COG0743	I:Lipid transport and metabolism	XP_031092859.1	1-deoxy-D-xylulose 5-phosphate reductoisomerase, chloroplastic [Ipomoea triloba]	sp|Q9XES0|DXR_MENPI	1-deoxy-D-xylulose 5-phosphate reductoisomerase, chloroplastic OS=Mentha piperita OX=34256 GN=DXR PE=2 SV=2	PF02670.17;PF13288.7;PF08436.13	DXP_reductoisom;DXPR_C;DXP_redisom_C	1-deoxy-D-xylulose 5-phosphate reductoisomerase;DXP reductoisomerase C-terminal domain;1-deoxy-D-xylulose 5-phosphate reductoisomerase C-terminal domain
g8476	8.78511e-129	1.24448	0.623	0.272	1.68112e-124								ENOG410Z7Z7	S:Function unknown	XP_031112789.1	pentatricopeptide repeat-containing protein At5g13770, chloroplastic [Ipomoea triloba]	sp|Q66GP4|PP379_ARATH	Pentatricopeptide repeat-containing protein At5g13770, chloroplastic OS=Arabidopsis thaliana OX=3702 GN=At5g13770 PE=2 SV=1	PF01535.21;PF13041.7;PF13812.7;PF12854.8;PF17177.5	PPR;PPR_2;PPR_3;PPR_1;PPR_long	PPR repeat;PPR repeat family;Pentatricopeptide repeat domain;PPR repeat;Pentacotripeptide-repeat region of PRORP
g60246	5.58516e-123	1.24447	0.552	0.21	1.06878e-118								ENOG410Z7Z7	S:Function unknown	XP_031118752.1	pentatricopeptide repeat-containing protein At1g09900 [Ipomoea triloba]	sp|Q3EDF8|PPR28_ARATH	Pentatricopeptide repeat-containing protein At1g09900 OS=Arabidopsis thaliana OX=3702 GN=At1g09900 PE=2 SV=1	PF13041.7;PF12854.8;PF01535.21;PF13812.7;PF17177.5	PPR_2;PPR_1;PPR;PPR_3;PPR_long	PPR repeat family;PPR repeat;PPR repeat;Pentatricopeptide repeat domain;Pentacotripeptide-repeat region of PRORP
g51191	6.14445e-52	1.24283	0.285	0.11	1.1758e-47	GO:0009535;GO:0061635;GO:0016874	cellular_component;biological_process;molecular_function	CC:chloroplast thylakoid membrane;BP:regulation of protein complex stability;MF:ligase activity					ENOG4111PN6	S:Function unknown	XP_031104442.1	protein MAINTENANCE OF PSII UNDER HIGH LIGHT 1 [Ipomoea triloba]	sp|Q9FL44|MPH1_ARATH	Protein MAINTENANCE OF PSII UNDER HIGH LIGHT 1 OS=Arabidopsis thaliana OX=3702 GN=MPH1 PE=1 SV=1
g20676	8.22042e-229	1.24166	0.876	0.467	1.57306e-224								ENOG4111SC3	S:Function unknown	XP_019200432.1	PREDICTED: thylakoid lumenal 17.4 kDa protein, chloroplastic [Ipomoea nil]	sp|P81760|TL17_ARATH	Thylakoid lumenal 17.4 kDa protein, chloroplastic OS=Arabidopsis thaliana OX=3702 GN=TL17 PE=1 SV=2	PF00805.23;PF13576.7;PF13599.7	Pentapeptide;Pentapeptide_3;Pentapeptide_4	Pentapeptide repeats (8 copies;Pentapeptide repeats (9 copies;Pentapeptide repeats (9 copies
g63907	1.28221e-166	1.24141	0.762	0.36	2.45364e-162	GO:0046686;GO:0006782;GO:0004853;GO:0009570	biological_process;biological_process;molecular_function;cellular_component	BP:response to cadmium ion;BP:protoporphyrinogen IX biosynthetic process;MF:uroporphyrinogen decarboxylase activity;CC:chloroplast stroma	K19937;K01599	RAB3GAP2;hemE, UROD	map00860	Porphyrin and chlorophyll metabolism	ENOG410XTJ2;COG0407;ENOG410XR8Z	S:Function unknown;H:Coenzyme transport and metabolism;S:Function unknown	GER29162.1	uroporphyrinogen decarboxylase [Striga asiatica]	sp|Q93ZB6|DCUP1_ARATH	Uroporphyrinogen decarboxylase 1, chloroplastic OS=Arabidopsis thaliana OX=3702 GN=HEME1 PE=2 SV=2	PF14655.7;PF01208.18	RAB3GAP2_N;URO-D	Rab3 GTPase-activating protein regulatory subunit N-terminus;Uroporphyrinogen decarboxylase (URO-D
g58198	4.08629e-51	1.24057	0.326	0.141	7.81952e-47	GO:0016787;GO:0005739;GO:0005524	molecular_function;cellular_component;molecular_function	MF:hydrolase activity;CC:mitochondrion;MF:ATP binding					COG0596	J:Translation, ribosomal structure and biogenesis	XP_031128160.1	protein ABHD11 [Ipomoea triloba]			PF12697.8;PF00561.21;PF12146.9;PF00975.21	Abhydrolase_6;Abhydrolase_1;Hydrolase_4;Thioesterase	Alpha/beta hydrolase family;alpha/beta hydrolase fold;Serine aminopeptidase, S33;Thioesterase domain
g25976	3.33501e-175	1.24019	0.756	0.35	6.38188e-171	GO:0046872;GO:0004462	molecular_function;molecular_function	MF:metal ion binding;MF:lactoylglutathione lyase activity	K01759	GLO1, gloA	map00620	Pyruvate metabolism	COG0346	T:Signal transduction mechanisms	XP_031109657.1	probable lactoylglutathione lyase, chloroplastic [Ipomoea triloba]	sp|Q8W593|LGUC_ARATH	Probable lactoylglutathione lyase, chloroplastic OS=Arabidopsis thaliana OX=3702 GN=At1g67280 PE=1 SV=1	PF00903.26;PF13669.7;PF18029.2	Glyoxalase;Glyoxalase_4;Glyoxalase_6	Glyoxalase/Bleomycin resistance protein/Dioxygenase superfamily;Glyoxalase/Bleomycin resistance protein/Dioxygenase superfamily;Glyoxalase-like domain
g8923	8.48865e-148	1.23655	0.697	0.329	1.62439e-143	GO:0015979	biological_process	BP:photosynthesis					ENOG41101H7	S:Function unknown	XP_031112743.1	ferredoxin-thioredoxin reductase, variable chain-like [Ipomoea triloba]	sp|P80680|FTRV_MAIZE	Ferredoxin-thioredoxin reductase, variable chain OS=Zea mays OX=4577 PE=1 SV=1	PF02941.16	FeThRed_A	Ferredoxin thioredoxin reductase variable alpha chain
g19770	1.45295e-215	1.23613	0.833	0.37	2.78037e-211	GO:0005759;GO:0003746;GO:0070125;GO:0005739;GO:0006414	cellular_component;molecular_function;biological_process;cellular_component;biological_process	CC:mitochondrial matrix;MF:translation elongation factor activity;BP:mitochondrial translational elongation;CC:mitochondrion;BP:translational elongation	K02357	tsf, TSFM			COG0264	J:Translation, ribosomal structure and biogenesis	XP_031094675.1	uncharacterized protein LOC115999068 [Ipomoea triloba]	sp|Q31BC3|EFTS_PROM9	Elongation factor Ts OS=Prochlorococcus marinus (strain MIT 9312) OX=74546 GN=tsf PE=3 SV=1	PF00889.20;PF00575.24	EF_TS;S1	Elongation factor TS;S1 RNA binding domain
g26888	7.23763e-56	1.23384	0.307	0.119	1.38499e-51	GO:0016021	cellular_component	CC:integral component of membrane					ENOG4111QZ6	S:Function unknown	XP_031109725.1	pentatricopeptide repeat-containing protein At4g21190 isoform X2 [Ipomoea triloba]	sp|Q8LG95|PP332_ARATH	Pentatricopeptide repeat-containing protein At4g21190 OS=Arabidopsis thaliana OX=3702 GN=EMB1417 PE=2 SV=1	PF01535.21;PF13041.7;PF12854.8	PPR;PPR_2;PPR_1	PPR repeat;PPR repeat family;PPR repeat
g25356	3.46742e-59	1.23163	0.329	0.13	6.63526e-55	GO:0003735;GO:0015935;GO:0022627;GO:0003723;GO:0006412	molecular_function;cellular_component;cellular_component;molecular_function;biological_process	MF:structural constituent of ribosome;CC:small ribosomal subunit;CC:cytosolic small ribosomal subunit;MF:RNA binding;BP:translation	K02969	RP-S20e, RPS20	map03010	Ribosome	COG0051	J:Translation, ribosomal structure and biogenesis	XP_019192010.1	PREDICTED: 40S ribosomal protein S20-2 [Ipomoea nil]	sp|Q9STY6|RS202_ARATH	40S ribosomal protein S20-2 OS=Arabidopsis thaliana OX=3702 GN=RPS20B PE=2 SV=1	PF00338.23	Ribosomal_S10	Ribosomal protein S10p/S20e
g41887	2.15975e-76	1.22989	0.453	0.199	4.13289e-72	GO:0015031;GO:0009507	biological_process;cellular_component	BP:protein transport;CC:chloroplast					ENOG4111JF1	S:Function unknown	XP_031119348.1	protein TIC 22, chloroplastic [Ipomoea triloba]	sp|Q9SZB2|TIC22_ARATH	Protein TIC 22, chloroplastic OS=Arabidopsis thaliana OX=3702 GN=TIC22 PE=1 SV=1	PF04278.13	Tic22	Tic22-like family
g55098	4.10007e-91	1.22883	0.509	0.228	7.8459e-87	GO:0009536	cellular_component	CC:plastid					ENOG410YR78	S:Function unknown	XP_031104558.1	uncharacterized protein LOC116008628 [Ipomoea triloba]			PF12843.8	QSregVF_b	Putative quorum-sensing-regulated virulence factor
g42657	1.99072e-211	1.22797	0.838	0.419	3.80945e-207	GO:0009941;GO:0004418;GO:0009570;GO:0018160;GO:0048046;GO:0033014;GO:0042742;GO:1900865	cellular_component;molecular_function;cellular_component;biological_process;cellular_component;biological_process;biological_process;biological_process	CC:chloroplast envelope;MF:hydroxymethylbilane synthase activity;CC:chloroplast stroma;BP:peptidyl-pyrromethane cofactor linkage;CC:apoplast;BP:tetrapyrrole biosynthetic process;BP:defense response to bacterium;BP:chloroplast RNA modification	K01749	hemC, HMBS	map00860	Porphyrin and chlorophyll metabolism	COG0181	H:Coenzyme transport and metabolism	XP_031130249.1	porphobilinogen deaminase, chloroplastic [Ipomoea triloba]	sp|Q43082|HEM3_PEA	Porphobilinogen deaminase, chloroplastic OS=Pisum sativum OX=3888 GN=HEMC PE=1 SV=1	PF01379.21;PF03900.16	Porphobil_deam;Porphobil_deamC	Porphobilinogen deaminase, dipyromethane cofactor binding domain;Porphobilinogen deaminase, C-terminal domain
g38247	5.08686e-45	1.22726	0.277	0.114	9.73422e-41								ENOG410YGAA	S:Function unknown	XP_031125442.1	uncharacterized protein LOC116027823 [Ipomoea triloba]
g47244	8.98725e-151	1.22471	0.679	0.301	1.7198e-146	GO:0016021	cellular_component	CC:integral component of membrane					ENOG4111P59	S:Function unknown	XP_031122092.1	uncharacterized protein LOC116025129 [Ipomoea triloba]			PF03703.15	bPH_2	Bacterial PH domain
g7782	9.76661e-48	1.22399	0.262	0.099	1.86894e-43	GO:0005840;GO:0003676	cellular_component;molecular_function	CC:ribosome;MF:nucleic acid binding					COG0539	C:Energy production and conversion	XP_031110920.1	uncharacterized protein LOC116015061 isoform X2 [Ipomoea triloba]	sp|P50889|RS1_LEULA	30S ribosomal protein S1 OS=Leuconostoc lactis OX=1246 GN=rps1 PE=2 SV=2	PF00575.24	S1	S1 RNA binding domain
g63877	1.70942e-288	1.22272	0.986	0.629	3.27114e-284	GO:0009507;GO:0003723;GO:0006397	cellular_component;molecular_function;biological_process	CC:chloroplast;MF:RNA binding;BP:mRNA processing	K11294	NCL, NSR1			ENOG410XZHK;ENOG41128XI	S:Function unknown;S:Function unknown	XP_031119117.1	29 kDa ribonucleoprotein A, chloroplastic-like [Ipomoea triloba]	sp|P49313|ROC1_NICPL	30 kDa ribonucleoprotein, chloroplastic OS=Nicotiana plumbaginifolia OX=4092 PE=2 SV=1	PF00076.23	RRM_1	RNA recognition motif. (a.k.a. RRM, RBD, or RNP domain
g60555	1.77951e-44	1.22254	0.271	0.109	3.40526e-40	GO:0016021	cellular_component	CC:integral component of membrane					ENOG4111DS5	S:Function unknown	XP_031118350.1	uncharacterized protein LOC116021954 [Ipomoea triloba]
g8934	6.15321e-83	1.22244	0.457	0.192	1.17748e-78								ENOG4111VPF	S:Function unknown	XP_031114181.1	chaperonin-like RbcX protein 2, chloroplastic [Ipomoea triloba]	sp|Q8L9X2|RBCX2_ARATH	Chaperonin-like RbcX protein 2, chloroplastic OS=Arabidopsis thaliana OX=3702 GN=RBCX2 PE=1 SV=1	PF02341.16	RcbX	RbcX protein
g35037	1.46265e-99	1.21979	0.492	0.197	2.79893e-95	GO:0016021	cellular_component	CC:integral component of membrane					ENOG41127IA	S:Function unknown	XP_031130884.1	uncharacterized protein LOC116032456 [Ipomoea triloba]
g29378	1.71602e-107	1.21835	0.516	0.209	3.28378e-103	GO:0016021	cellular_component	CC:integral component of membrane					ENOG410YG8H	S:Function unknown	XP_019172200.1	PREDICTED: protein CHAPERONE-LIKE PROTEIN OF POR1, chloroplastic [Ipomoea nil]	sp|Q9FN50|CPP1_ARATH	Protein CHAPERONE-LIKE PROTEIN OF POR1, chloroplastic OS=Arabidopsis thaliana OX=3702 GN=CPP1 PE=1 SV=1	PF11833.9	CPP1-like	Protein CHAPERONE-LIKE PROTEIN OF POR1-like
g33880	4.09543e-196	1.21571	0.828	0.455	7.83702e-192	GO:0009534;GO:0016021;GO:0016301	cellular_component;cellular_component;molecular_function	CC:chloroplast thylakoid;CC:integral component of membrane;MF:kinase activity					ENOG4111JTZ	S:Function unknown	XP_031091161.1	uncharacterized protein LOC115996163 [Ipomoea triloba]			PF13301.7	DUF4079	Protein of unknown function (DUF4079
g17392	1.83213e-93	1.21382	0.502	0.214	3.50596e-89				K07735	algH			ENOG410Y35P	S:Function unknown	XP_031093868.1	uncharacterized protein LOC115998427 [Ipomoea triloba]	sp|Q9L1U6|Y2948_STRCO	UPF0301 protein SCO2948 OS=Streptomyces coelicolor (strain ATCC BAA-471 / A3(2) / M145) OX=100226 GN=SCO2948 PE=3 SV=1	PF02622.16	DUF179	Uncharacterized ACR, COG1678
g7690	2.10519e-81	1.21163	0.464	0.198	4.02849e-77	GO:0016021;GO:0005886;GO:0005524;GO:0004672	cellular_component;cellular_component;molecular_function;molecular_function	CC:integral component of membrane;CC:plasma membrane;MF:ATP binding;MF:protein kinase activity					COG4886	J:Translation, ribosomal structure and biogenesis	XP_031112549.1	probably inactive leucine-rich repeat receptor-like protein kinase At3g28040 [Ipomoea triloba]	sp|Q9LRT1|Y3804_ARATH	Probably inactive leucine-rich repeat receptor-like protein kinase At3g28040 OS=Arabidopsis thaliana OX=3702 GN=At3g28040 PE=1 SV=1	PF13855.7;PF00069.26;PF07714.18;PF12799.8;PF08263.13	LRR_8;Pkinase;PK_Tyr_Ser-Thr;LRR_4;LRRNT_2	Leucine rich repeat;Protein kinase domain;Protein tyrosine and serine/threonine kinase;Leucine Rich repeats (2 copies;Leucine rich repeat N-terminal domain
g34549	1.45103e-277	1.20993	0.969	0.632	2.77669e-273	GO:0005794;GO:0022857;GO:0015297;GO:0016021	cellular_component;molecular_function;molecular_function;cellular_component	CC:Golgi apparatus;MF:transmembrane transporter activity;MF:antiporter activity;CC:integral component of membrane	K15283	SLC35E1			ENOG410XP1S	S:Function unknown	XP_031130648.1	triose phosphate/phosphate translocator, chloroplastic [Ipomoea triloba]	sp|P11869|TPT_SPIOL	Triose phosphate/phosphate translocator, chloroplastic OS=Spinacia oleracea OX=3562 PE=1 SV=1	PF03151.17;PF00892.21	TPT;EamA	Triose-phosphate Transporter family;EamA-like transporter family
g14242	3.1385e-75	1.20988	0.457	0.206	6.00584e-71	GO:0020037;GO:0016021;GO:0006979;GO:0016688;GO:0004601;GO:0009507	molecular_function;cellular_component;biological_process;molecular_function;molecular_function;cellular_component	MF:heme binding;CC:integral component of membrane;BP:response to oxidative stress;MF:L-ascorbate peroxidase activity;MF:peroxidase activity;CC:chloroplast	K00434	E1.11.1.11	map00480;map00053	Glutathione metabolism;Ascorbate and aldarate metabolism	COG0376	P:Inorganic ion transport and metabolism	XP_031098747.1	probable L-ascorbate peroxidase 6, chloroplastic/mitochondrial isoform X1 [Ipomoea triloba]	sp|Q42593|APXT_ARATH	L-ascorbate peroxidase T, chloroplastic OS=Arabidopsis thaliana OX=3702 GN=APXT PE=2 SV=2	PF00141.24	peroxidase	Peroxidase
g20715	1.95275e-221	1.20964	0.915	0.483	3.73678e-217	GO:0042721;GO:0009941;GO:0009706;GO:0008320;GO:0045039;GO:0045036	cellular_component;cellular_component;cellular_component;molecular_function;biological_process;biological_process	CC:mitochondrial inner membrane protein insertion complex;CC:chloroplast envelope;CC:chloroplast inner membrane;MF:protein transmembrane transporter activity;BP:protein import into mitochondrial inner membrane;BP:protein targeting to chloroplast					ENOG4111UT5	O:Posttranslational modification, protein turnover, chaperones	XP_031095342.1	chloroplastic import inner membrane translocase subunit HP30-2-like [Ipomoea triloba]	sp|Q9FLT9|HP302_ARATH	Chloroplastic import inner membrane translocase subunit HP30-2 OS=Arabidopsis thaliana OX=3702 GN=HP30-2 PE=1 SV=1	PF02466.20;PF00536.31;PF07647.18	Tim17;SAM_1;SAM_2	Tim17/Tim22/Tim23/Pmp24 family;SAM domain (Sterile alpha motif;SAM domain (Sterile alpha motif
g1852	7.75327e-63	1.20926	0.35	0.14	1.48367e-58	GO:0016787;GO:0080085;GO:0009982;GO:0045038;GO:0009416;GO:0003723;GO:0000502;GO:0001522;GO:0009507	molecular_function;cellular_component;molecular_function;biological_process;biological_process;molecular_function;cellular_component;biological_process;cellular_component	MF:hydrolase activity;CC:signal recognition particle, chloroplast targeting;MF:pseudouridine synthase activity;BP:protein import into chloroplast thylakoid membrane;BP:response to light stimulus;MF:RNA binding;CC:proteasome complex;BP:pseudouridine synthesis;CC:chloroplast	K12271	SRP43, CAO			COG0666	S:Function unknown	XP_031117227.1	signal recognition particle 43 kDa protein, chloroplastic [Ipomoea triloba]	sp|O22265|SR43C_ARATH	Signal recognition particle 43 kDa protein, chloroplastic OS=Arabidopsis thaliana OX=3702 GN=CAO PE=1 SV=2	PF00385.25;PF12796.8;PF13857.7;PF13637.7;PF00023.31;PF13606.7	Chromo;Ank_2;Ank_5;Ank_4;Ank;Ank_3	Chromo (CHRromatin Organisation MOdifier) domain;Ankyrin repeats (3 copies;Ankyrin repeats (many copies;Ankyrin repeats (many copies;Ankyrin repeat;Ankyrin repeat
g55219	4.09524e-64	1.20846	0.383	0.162	7.83665e-60	GO:0050661;GO:0016616;GO:0051287;GO:0003723;GO:0030267;GO:0009507;GO:0016491	molecular_function;molecular_function;molecular_function;molecular_function;molecular_function;cellular_component;molecular_function	MF:NADP binding;MF:oxidoreductase activity, acting on the CH-OH group of donors, NAD or NADP as acceptor;MF:NAD binding;MF:RNA binding;MF:glyoxylate reductase (NADP) activity;CC:chloroplast;MF:oxidoreductase activity	K18121	GLYR	map00630;map00650	Glyoxylate and dicarboxylate metabolism;Butanoate metabolism	COG2084	F:Nucleotide transport and metabolism	XP_031104210.1	glyoxylate/succinic semialdehyde reductase 2, chloroplastic [Ipomoea triloba]	sp|F4I907|GLYR2_ARATH	Glyoxylate/succinic semialdehyde reductase 2, chloroplastic OS=Arabidopsis thaliana OX=3702 GN=GLYR2 PE=1 SV=1	PF03446.16;PF14833.7;PF02558.17;PF02826.20;PF03807.18;PF01488.21	NAD_binding_2;NAD_binding_11;ApbA;2-Hacid_dh_C;F420_oxidored;Shikimate_DH	NAD binding domain of 6-phosphogluconate dehydrogenase;NAD-binding of NADP-dependent 3-hydroxyisobutyrate dehydrogenase;Ketopantoate reductase PanE/ApbA;D-isomer specific 2-hydroxyacid dehydrogenase, NAD binding domain;NADP oxidoreductase coenzyme F420-dependent;Shikimate / quinate 5-dehydrogenase
g19690	1.50295e-108	1.20422	0.553	0.231	2.87605e-104	GO:0009570;GO:0051536;GO:0051539;GO:0005524;GO:0016226	cellular_component;molecular_function;molecular_function;molecular_function;biological_process	CC:chloroplast stroma;MF:iron-sulfur cluster binding;MF:4 iron, 4 sulfur cluster binding;MF:ATP binding;BP:iron-sulfur cluster assembly					COG0489	D:Cell cycle control, cell division, chromosome partitioning	XP_031096204.1	fe-S cluster assembly factor HCF101, chloroplastic isoform X2 [Ipomoea triloba]	sp|Q6STH5|HF101_ARATH	Fe-S cluster assembly factor HCF101, chloroplastic OS=Arabidopsis thaliana OX=3702 GN=HCF101 PE=1 SV=1	PF10609.10;PF01883.20;PF01656.24;PF13614.7;PF06155.13;PF09140.12;PF07015.12;PF02374.16	ParA;FeS_assembly_P;CbiA;AAA_31;GBBH-like_N;MipZ;VirC1;ArsA_ATPase	NUBPL iron-transfer P-loop NTPase;Iron-sulfur cluster assembly protein;CobQ/CobB/MinD/ParA nucleotide binding domain;AAA domain;Gamma-butyrobetaine hydroxylase-like, N-terminal;ATPase MipZ;VirC1 protein;Anion-transporting ATPase
g25019	9.04385e-71	1.20299	0.371	0.146	1.73063e-66								ENOG410XYNX	A:RNA processing and modification	XP_031103687.1	IQ domain-containing protein IQM6-like [Ipomoea triloba]	sp|Q9M2G8|IQM6_ARATH	IQ domain-containing protein IQM6 OS=Arabidopsis thaliana OX=3702 GN=IQM6 PE=2 SV=1	PF01040.19	UbiA	UbiA prenyltransferase family
g38646	7.36147e-128	1.20283	0.632	0.282	1.40869e-123	GO:0004161;GO:0004659;GO:0008299;GO:0036422;GO:0016740;GO:0004311	molecular_function;molecular_function;biological_process;molecular_function;molecular_function;molecular_function	MF:dimethylallyltranstransferase activity;MF:prenyltransferase activity;BP:isoprenoid biosynthetic process;MF:heptaprenyl diphosphate synthase activity;MF:transferase activity;MF:farnesyltranstransferase activity	K13789	GGPS	map00900	Terpenoid backbone biosynthesis	COG0142	O:Posttranslational modification, protein turnover, chaperones	AGT02260.1	geranylgeranyl pyrophosphate synthase [Ipomoea batatas]	sp|P80042|GGPPS_CAPAN	Geranylgeranyl pyrophosphate synthase, chloroplastic OS=Capsicum annuum OX=4072 GN=GGPS1 PE=3 SV=1	PF00348.18	polyprenyl_synt	Polyprenyl synthetase
g34019	3.80908e-143	1.20179	0.685	0.325	7.28906e-139	GO:0004807;GO:0019563;GO:0046166;GO:0005829;GO:0006096;GO:0006094	molecular_function;biological_process;biological_process;cellular_component;biological_process;biological_process	MF:triose-phosphate isomerase activity;BP:glycerol catabolic process;BP:glyceraldehyde-3-phosphate biosynthetic process;CC:cytosol;BP:glycolytic process;BP:gluconeogenesis	K01803	TPI, tpiA	map00010;map00051;map00710;map00562	Glycolysis / Gluconeogenesis;Fructose and mannose metabolism;Carbon fixation in photosynthetic organisms;Inositol phosphate metabolism	COG0149	U:Intracellular trafficking, secretion, and vesicular transport	XP_031130542.1	triosephosphate isomerase, chloroplastic-like [Ipomoea triloba]	sp|P48496|TPIC_SPIOL	Triosephosphate isomerase, chloroplastic OS=Spinacia oleracea OX=3562 GN=TPIP1 PE=1 SV=1	PF00121.19	TIM	Triosephosphate isomerase
g43685	3.34073e-54	1.19948	0.318	0.13	6.39283e-50	GO:0009416;GO:0045893	biological_process;biological_process	BP:response to light stimulus;BP:positive regulation of transcription, DNA-templated	BP:response to light stimulus;BP:positive regulation of transcription, DNA-templated				ENOG4111427	S:Function unknown	XP_031120255.1	COP1-interacting protein 7-like isoform X3 [Ipomoea triloba]	sp|O80386|CIP7_ARATH	COP1-interacting protein 7 OS=Arabidopsis thaliana OX=3702 GN=CIP7 PE=1 SV=1
g47412	8.71109e-39	1.19754	0.275	0.124	1.66695e-34	GO:0009735	biological_process	BP:response to cytokinin					ENOG410Y95G	S:Function unknown	XP_031122850.1	ACT domain-containing protein ACR4-like isoform X2 [Ipomoea triloba]	sp|Q8LJW3|ACR4_ARATH	ACT domain-containing protein ACR4 OS=Arabidopsis thaliana OX=3702 GN=ACR4 PE=2 SV=1	PF01842.26;PF13291.7;PF13740.7	ACT;ACT_4;ACT_6	ACT domain;ACT domain;ACT domain
g61216	2.88865e-100	1.19738	0.525	0.218	5.52772e-96								ENOG410YSMZ	S:Function unknown	XP_031117993.1	uncharacterized protein LOC116021669 [Ipomoea triloba]
g4591	1.89511e-83	1.19666	0.414	0.16	3.62649e-79	GO:0000160	biological_process	BP:phosphorelay signal transduction system					COG0667	V:Defense mechanisms	XP_031110835.1	flagellar radial spoke protein 5 isoform X1 [Ipomoea triloba]	sp|Q27YU7|RSP5_CHLRE	Flagellar radial spoke protein 5 OS=Chlamydomonas reinhardtii OX=3055 GN=RSP5 PE=1 SV=1	PF00248.22	Aldo_ket_red	Aldo/keto reductase family
g31148	1.26282e-77	1.19561	0.464	0.208	2.41653e-73	GO:0016021;GO:0009507	cellular_component;cellular_component	CC:integral component of membrane;CC:chloroplast					ENOG410YWYG	S:Function unknown	XP_031091227.1	uncharacterized protein LOC115996217 [Ipomoea triloba]
g19548	2.23732e-50	1.19478	0.311	0.13	4.28133e-46	GO:0009535;GO:0010598;GO:0009767	cellular_component;cellular_component;biological_process	CC:chloroplast thylakoid membrane;CC:NAD(P)H dehydrogenase complex (plastoquinone;BP:photosynthetic electron transport chain	K00345	ndhS			ENOG41129S2	S:Function unknown	XP_031093574.1	NAD(P)H-quinone oxidoreductase subunit S, chloroplastic [Ipomoea triloba]	sp|Q9T0A4|NDHS_ARATH	NAD(P)H-quinone oxidoreductase subunit S, chloroplastic OS=Arabidopsis thaliana OX=3702 GN=ndhS PE=1 SV=1
g18834	1.38635e-32	1.19398	0.25	0.116	2.65293e-28	GO:0045892;GO:0003677	biological_process;molecular_function	BP:negative regulation of transcription, DNA-templated;MF:DNA binding	BP:negative regulation of transcription, DNA-templated;MF:DNA binding				ENOG410YV5M	S:Function unknown	XP_019184255.1	PREDICTED: transcription repressor OFP1-like isoform X4 [Ipomoea nil]	sp|Q9LZW2|OFP1_ARATH	Transcription repressor OFP1 OS=Arabidopsis thaliana OX=3702 GN=OFP1 PE=1 SV=1	PF04844.14;PF13724.7	Ovate;DNA_binding_2	Transcriptional repressor, ovate;DNA-binding domain
g58786	2.23084e-64	1.19283	0.353	0.137	4.26893e-60	GO:0016020;GO:0008289;GO:0006869	cellular_component;molecular_function;biological_process	CC:membrane;MF:lipid binding;BP:lipid transport					ENOG410YT63;ENOG41107A7	S:Function unknown;U:Intracellular trafficking, secretion, and vesicular transport	ADV02772.1	lipid transfer protein 1a [Ipomoea batatas]	sp|A2ZAS9|NLTP3_ORYSI	Non-specific lipid-transfer protein 3 OS=Oryza sativa subsp. indica OX=39946 GN=LTP110-A PE=2 SV=1
g24713	2.18767e-61	1.19149	0.373	0.158	4.18632e-57	GO:0019898;GO:0009654;GO:0005509;GO:0015979	cellular_component;cellular_component;molecular_function;biological_process	CC:extrinsic component of membrane;CC:photosystem II oxygen evolving complex;MF:calcium ion binding;BP:photosynthesis					ENOG411207S	S:Function unknown	XP_031102143.1	psbP domain-containing protein 6, chloroplastic [Ipomoea triloba]	sp|Q9LXX5|PPD6_ARATH	PsbP domain-containing protein 6, chloroplastic OS=Arabidopsis thaliana OX=3702 GN=PPD6 PE=1 SV=1	PF01789.17	PsbP	PsbP
g4287	2.49097e-207	1.19051	0.794	0.332	4.76671e-203	GO:0006869	biological_process	BP:lipid transport					ENOG410YV7D	S:Function unknown	XP_019151832.1	PREDICTED: non-specific lipid-transfer protein 2-like [Ipomoea nil]	sp|P82353|NLTP2_PRUAR	Non-specific lipid-transfer protein 2 OS=Prunus armeniaca OX=36596 PE=1 SV=1	PF14368.7;PF00234.23	LTP_2;Tryp_alpha_amyl	Probable lipid transfer;Protease inhibitor/seed storage/LTP family
g45799	2.74198e-102	1.18878	0.539	0.234	5.24705e-98	GO:0009658;GO:0006355;GO:0003690;GO:0032502;GO:0009507	biological_process;biological_process;molecular_function;biological_process;cellular_component	BP:chloroplast organization;BP:regulation of transcription, DNA-templated;MF:double-stranded DNA binding;BP:developmental process;CC:chloroplast	BP:chloroplast organization;BP:regulation of transcription, DNA-templated;MF:double-stranded DNA binding;BP:developmental process;CC:chloroplast	MTERFD			ENOG410XT49	S:Function unknown	XP_031122903.1	transcription termination factor MTEF1, chloroplastic [Ipomoea triloba]	sp|Q84X53|MTEF1_ARATH	Transcription termination factor MTEF1, chloroplastic OS=Arabidopsis thaliana OX=3702 GN=MTERF1 PE=2 SV=2	PF02536.15	mTERF	mTERF
g19572	3.29156e-41	1.18788	0.275	0.12	6.29872e-37	GO:0016021	cellular_component	CC:integral component of membrane					ENOG4111TVW	S:Function unknown	XP_019151215.1	PREDICTED: uncharacterized protein LOC109147979 [Ipomoea nil]			PF12159.9	DUF3593	Protein of unknown function (DUF3593
g50610	4.30623e-52	1.1859	0.348	0.156	8.24041e-48								ENOG410Z0AY	S:Function unknown	XP_031123323.1	uncharacterized protein LOC116026023 [Ipomoea triloba]			PF03080.16;PF14365.7	Neprosin;Neprosin_AP	Neprosin;Neprosin activation peptide
g26453	6.61317e-51	1.1854	0.311	0.13	1.2655e-46	GO:0009535;GO:0009941;GO:0005524;GO:0004017	cellular_component;cellular_component;molecular_function;molecular_function	CC:chloroplast thylakoid membrane;CC:chloroplast envelope;MF:ATP binding;MF:adenylate kinase activity	K00939	adk, AK	map00730;map00230	Thiamine metabolism;Purine metabolism	COG0563	S:Function unknown	XP_031108972.1	adenylate kinase 5, chloroplastic isoform X1 [Ipomoea triloba]	sp|Q8VYL1|KAD5_ARATH	Adenylate kinase 5, chloroplastic OS=Arabidopsis thaliana OX=3702 GN=At5g35170 PE=1 SV=1	PF09353.11;PF00406.23;PF13207.7	DUF1995;ADK;AAA_17	Domain of unknown function (DUF1995;Adenylate kinase;AAA domain
g53780	2.34526e-49	1.18484	0.291	0.118	4.4879e-45	GO:0016021	cellular_component	CC:integral component of membrane					ENOG410ZMB5;ENOG410YNKJ	L:Replication, recombination and repair;S:Function unknown	XP_031105543.1	uncharacterized protein LOC116010330 isoform X1 [Ipomoea triloba]			PF19078.1	Big_12	Bacterial Ig-like domain
g38710	9.78274e-80	1.18283	0.442	0.188	1.87203e-75	GO:0042025	cellular_component	CC:host cell nucleus	K14505	CYCD3	map04075	Plant hormone signal transduction	ENOG410XRKC	S:Function unknown	XP_031124149.1	cyclin-D3-3-like [Ipomoea triloba]	sp|Q9SN11|CCD33_ARATH	Cyclin-D3-3 OS=Arabidopsis thaliana OX=3702 GN=CYCD3-3 PE=2 SV=1	PF00134.24;PF02984.20	Cyclin_N;Cyclin_C	Cyclin, N-terminal domain;Cyclin, C-terminal domain
g43148	4.64843e-80	1.18228	0.42	0.167	8.89523e-76	GO:0004252	molecular_function	MF:serine-type endopeptidase activity	K01358	clpP, CLPP			COG0740	S:Function unknown	XP_031108044.1	ATP-dependent Clp protease proteolytic subunit 6, chloroplastic [Ipomoea triloba]	sp|Q9SAA2|CLPP6_ARATH	ATP-dependent Clp protease proteolytic subunit 6, chloroplastic OS=Arabidopsis thaliana OX=3702 GN=CLPP6 PE=1 SV=1	PF00574.24	CLP_protease	Clp protease
g9416	2.03814e-118	1.18061	0.599	0.253	3.90019e-114	GO:0005737	cellular_component	CC:cytoplasm	K03255	TIF31, CLU1			ENOG410XQUQ	S:Function unknown	XP_031112428.1	protein TSS [Ipomoea triloba]	sp|F4JKH6|TSS_ARATH	Protein TSS OS=Arabidopsis thaliana OX=3702 GN=TSS PE=1 SV=1	PF13424.7;PF12807.8;PF13374.7;PF15044.7;PF07719.18;PF13371.7	TPR_12;eIF3_p135;TPR_10;CLU_N;TPR_2;TPR_9	Tetratricopeptide repeat;Translation initiation factor eIF3 subunit 135;Tetratricopeptide repeat;Mitochondrial function, CLU-N-term;Tetratricopeptide repeat;Tetratricopeptide repeat
g10452	3.36046e-148	1.18053	0.709	0.325	6.43058e-144								ENOG41108AB	S:Function unknown	XP_031100050.1	protein TIC 100 [Ipomoea triloba]	sp|Q8LPR8|TI100_ARATH	Protein TIC 100 OS=Arabidopsis thaliana OX=3702 GN=TIC100 PE=1 SV=1	PF02493.21	MORN	MORN repeat
g54240	5.87209e-58	1.17883	0.351	0.148	1.12368e-53	GO:0006572;GO:0005829;GO:0006520;GO:0008483;GO:0009058;GO:0004838;GO:0030170;GO:0010189	biological_process;cellular_component;biological_process;molecular_function;biological_process;molecular_function;molecular_function;biological_process	BP:tyrosine catabolic process;CC:cytosol;BP:cellular amino acid metabolic process;MF:transaminase activity;BP:biosynthetic process;MF:L-tyrosine;MF:pyridoxal phosphate binding;BP:vitamin E biosynthetic process	K00815	TAT	map00270;map00130;map00950;map00360;map00350;map00960;map00400	Cysteine and methionine metabolism;Ubiquinone and other terpenoid-quinone biosynthesis;Isoquinoline alkaloid biosynthesis;Phenylalanine metabolism;Tyrosine metabolism;Tropane, piperidine and pyridine alkaloid biosynthesis;Phenylalanine, tyrosine and tryptophan biosynthesis	COG0436	S:Function unknown	XP_031105934.1	probable aminotransferase TAT2 [Ipomoea triloba]	sp|Q9FN30|TAT2_ARATH	Probable aminotransferase TAT2 OS=Arabidopsis thaliana OX=3702 GN=At5g53970 PE=2 SV=1	PF00155.22;PF00266.20	Aminotran_1_2;Aminotran_5	Aminotransferase class I and II;Aminotransferase class-V
g25459	3.88962e-53	1.17755	0.309	0.123	7.44318e-49	GO:0050309	molecular_function	MF:sugar-terminal-phosphatase activity					ENOG410YJ0J	S:Function unknown	XP_031107230.1	5-amino-6-(5-phospho-D-ribitylamino)uracil phosphatase, chloroplastic [Ipomoea triloba]	sp|Q9LDD5|PYRP2_ARATH	5-amino-6-(5-phospho-D-ribitylamino)uracil phosphatase, chloroplastic OS=Arabidopsis thaliana OX=3702 GN=PYRP2 PE=1 SV=1	PF13419.7	HAD_2	Haloacid dehalogenase-like hydrolase
g5155	3.82326e-90	1.17709	0.491	0.208	7.3162e-86	GO:0003735;GO:0000462;GO:0022627;GO:0006412;GO:0005840	molecular_function;biological_process;cellular_component;biological_process;cellular_component	MF:structural constituent of ribosome;BP:maturation of SSU-rRNA from tricistronic rRNA transcript (SSU-rRNA, 5.8S rRNA, LSU-rRNA;CC:cytosolic small ribosomal subunit;BP:translation;CC:ribosome	K02995	RP-S8e, RPS8	map03010	Ribosome	COG2007	M:Cell wall/membrane/envelope biogenesis	XP_031111646.1	40S ribosomal protein S8-like [Ipomoea triloba]	sp|P49199|RS8_ORYSJ	40S ribosomal protein S8 OS=Oryza sativa subsp. japonica OX=39947 GN=RPS8 PE=2 SV=2	PF01201.23	Ribosomal_S8e	Ribosomal protein S8e
g192	2.24483e-54	1.17679	0.295	0.112	4.29571e-50	GO:0008017;GO:0000226	molecular_function;biological_process	MF:microtubule binding;BP:microtubule cytoskeleton organization	K16732	PRC1			ENOG410YZBK	S:Function unknown	XP_031114969.1	65-kDa microtubule-associated protein 1-like [Ipomoea triloba]	sp|Q9FLP0|MA651_ARATH	65-kDa microtubule-associated protein 1 OS=Arabidopsis thaliana OX=3702 GN=MAP65-1 PE=1 SV=1	PF03999.13	MAP65_ASE1	Microtubule associated protein (MAP65/ASE1 family
g21290	2.72182e-73	1.17664	0.415	0.172	5.20848e-69	GO:0008270;GO:0016491	molecular_function;molecular_function	MF:zinc ion binding;MF:oxidoreductase activity	K00121	frmA, ADH5, adhC	map00010;map00071;map00350	Glycolysis / Gluconeogenesis;Fatty acid degradation;Tyrosine metabolism	COG1062	C:Energy production and conversion	XP_031102772.1	8-hydroxygeraniol oxidoreductase-like [Ipomoea triloba]	sp|W8JWV8|8HGO_CATRO	8-hydroxygeraniol oxidoreductase OS=Catharanthus roseus OX=4058 GN=8HGO PE=1 SV=1	PF00107.27;PF08240.13;PF16912.6	ADH_zinc_N;ADH_N;Glu_dehyd_C	Zinc-binding dehydrogenase;Alcohol dehydrogenase GroES-like domain;Glucose dehydrogenase C-terminus
g34782	2.16543e-67	1.17556	0.408	0.175	4.14377e-63	GO:0006355;GO:0005634;GO:0009507;GO:0009416;GO:0090228	biological_process;cellular_component;cellular_component;biological_process;biological_process	BP:regulation of transcription, DNA-templated;CC:nucleus;CC:chloroplast;BP:response to light stimulus;BP:positive regulation of red or far-red light signaling pathway	BP:regulation of transcription, DNA-templated;CC:nucleus;CC:chloroplast;BP:response to light stimulus;BP:positive regulation of red or far-red light signaling pathway				ENOG4111FQI	S:Function unknown	XP_031129601.1	protein PLASTID TRANSCRIPTIONALLY ACTIVE 12, chloroplastic [Ipomoea triloba]	sp|F4IHY7|PTA12_ARATH	Protein PLASTID TRANSCRIPTIONALLY ACTIVE 12, chloroplastic OS=Arabidopsis thaliana OX=3702 GN=PTAC12 PE=1 SV=1
g57784	2.92404e-62	1.17107	0.338	0.13	5.59543e-58								COG0451	M:Cell wall/membrane/envelope biogenesis	XP_031126935.1	cinnamoyl-CoA reductase 1-like isoform X1 [Ipomoea triloba]	sp|Q9S9N9|CCR1_ARATH	Cinnamoyl-CoA reductase 1 OS=Arabidopsis thaliana OX=3702 GN=CCR1 PE=1 SV=1	PF01370.22;PF01073.20;PF07993.13;PF13460.7	Epimerase;3Beta_HSD;NAD_binding_4;NAD_binding_10	NAD dependent epimerase/dehydratase family;3-beta hydroxysteroid dehydrogenase/isomerase family;Male sterility protein;NAD(P)H-binding
g47081	6.03673e-102	1.17072	0.53	0.218	1.15519e-97	GO:0031977;GO:0003755;GO:0009507	cellular_component;molecular_function;cellular_component	CC:thylakoid lumen;MF:peptidyl-prolyl cis-trans isomerase activity;CC:chloroplast	K03768	PPIB, ppiB			COG0652	P:Inorganic ion transport and metabolism	XP_031120748.1	peptidyl-prolyl cis-trans isomerase CYP28, chloroplastic [Ipomoea triloba]	sp|O65220|CPY28_ARATH	Peptidyl-prolyl cis-trans isomerase CYP28, chloroplastic OS=Arabidopsis thaliana OX=3702 GN=CYP28 PE=1 SV=1	PF00160.22	Pro_isomerase	Cyclophilin type peptidyl-prolyl cis-trans isomerase/CLD
g10238	8.4493e-115	1.16965	0.605	0.272	1.61686e-110	GO:0009579;GO:0048046;GO:0022626;GO:0009941;GO:0045041;GO:0009570;GO:0005829;GO:0006458;GO:0051082;GO:0009658;GO:0009793;GO:0042026;GO:0005739;GO:0005524	cellular_component;cellular_component;cellular_component;cellular_component;biological_process;cellular_component;cellular_component;biological_process;molecular_function;biological_process;biological_process;biological_process;cellular_component;molecular_function	CC:thylakoid;CC:apoplast;CC:cytosolic ribosome;CC:chloroplast envelope;BP:protein import into mitochondrial intermembrane space;CC:chloroplast stroma;CC:cytosol;BP:'de novo' protein folding;MF:unfolded protein binding;BP:chloroplast organization;BP:embryo development ending in seed dormancy;BP:protein refolding;CC:mitochondrion;MF:ATP binding					COG0459	K:Transcription	XP_031100536.1	ruBisCO large subunit-binding protein subunit alpha-like [Ipomoea triloba]	sp|P08926|RUBA_PEA	RuBisCO large subunit-binding protein subunit alpha, chloroplastic OS=Pisum sativum OX=3888 PE=1 SV=2	PF00118.25	Cpn60_TCP1	TCP-1/cpn60 chaperonin family
g4477	2.72764e-107	1.16838	0.483	0.179	5.2196e-103	GO:0003723	molecular_function	MF:RNA binding					ENOG410YDC7	S:Function unknown	XP_031110977.1	protein TAB2 homolog, chloroplastic [Ipomoea triloba]	sp|Q9SFB3|ATAB2_ARATH	Protein TAB2 homolog, chloroplastic OS=Arabidopsis thaliana OX=3702 GN=ATAB2 PE=2 SV=1	PF06485.12	Tab2_like	RNA-binding protein Tab2/Atab2
g4398	1.53942e-84	1.16836	0.438	0.176	2.94583e-80	GO:0015995;GO:0009507;GO:0015979;GO:0005524;GO:0016851	biological_process;cellular_component;biological_process;molecular_function;molecular_function	BP:chlorophyll biosynthetic process;CC:chloroplast;BP:photosynthesis;MF:ATP binding;MF:magnesium chelatase activity	K03404	chlD, bchD	map00860	Porphyrin and chlorophyll metabolism	COG1240	H:Coenzyme transport and metabolism	XP_031112333.1	magnesium-chelatase subunit ChlD, chloroplastic [Ipomoea triloba]	sp|O24133|CHLD_TOBAC	Magnesium-chelatase subunit ChlD, chloroplastic OS=Nicotiana tabacum OX=4097 GN=CHLD PE=2 SV=1	PF17863.2;PF01078.22;PF13519.7;PF00158.27;PF00493.24;PF07728.15;PF08595.12	AAA_lid_2;Mg_chelatase;VWA_2;Sigma54_activat;MCM;AAA_5;RXT2_N	AAA lid domain;Magnesium chelatase, subunit ChlI;von Willebrand factor type A domain;Sigma-54 interaction domain;MCM P-loop domain;AAA domain (dynein-related subfamily;RXT2-like, N-terminal
g26139	1.92177e-41	1.16639	0.28	0.123	3.67751e-37	GO:0020037;GO:0006979;GO:0005576;GO:0042744;GO:0009505;GO:0046872;GO:0004601;GO:0009506	molecular_function;biological_process;cellular_component;biological_process;cellular_component;molecular_function;molecular_function;cellular_component	MF:heme binding;BP:response to oxidative stress;CC:extracellular region;BP:hydrogen peroxide catabolic process;CC:plant-type cell wall;MF:metal ion binding;MF:peroxidase activity;CC:plasmodesma	K00430	E1.11.1.7	map00940	Phenylpropanoid biosynthesis	ENOG410YF8G	G:Carbohydrate transport and metabolism	XP_031107870.1	peroxidase 25 [Ipomoea triloba]	sp|O80822|PER25_ARATH	Peroxidase 25 OS=Arabidopsis thaliana OX=3702 GN=PER25 PE=2 SV=2	PF00141.24;PF01126.21	peroxidase;Heme_oxygenase	Peroxidase;Heme oxygenase
g39285	1.19974e-135	1.16617	0.671	0.311	2.29581e-131	GO:0045454;GO:0015035;GO:0005623;GO:0009055	biological_process;molecular_function;cellular_component;molecular_function	BP:cell redox homeostasis;MF:protein disulfide oxidoreductase activity;CC:cell;MF:electron carrier activity	K17479	GRXCR1			ENOG4111HAI	U:Intracellular trafficking, secretion, and vesicular transport	XP_031125448.1	glutaredoxin domain-containing cysteine-rich protein CG12206 [Ipomoea triloba]	sp|Q9LH89|Y3885_ARATH	Uncharacterized protein At3g28850 OS=Arabidopsis thaliana OX=3702 GN=At3g28850 PE=4 SV=1	PF00462.25	Glutaredoxin	Glutaredoxin
g17415	4.72468e-61	1.16567	0.358	0.148	9.04116e-57	GO:0003333;GO:0016021;GO:0015171;GO:0005886	biological_process;cellular_component;molecular_function;cellular_component	BP:amino acid transmembrane transport;CC:integral component of membrane;MF:amino acid transmembrane transporter activity;CC:plasma membrane	K15015	SLC32A, VGAT			COG0814	L:Replication, recombination and repair	XP_031095904.1	amino acid transporter AVT1I-like isoform X1 [Ipomoea triloba]	sp|F4J1Q9|AVT1I_ARATH	Amino acid transporter AVT1I OS=Arabidopsis thaliana OX=3702 GN=AVT1I PE=3 SV=1	PF01490.19	Aa_trans	Transmembrane amino acid transporter protein
g13128	5.75687e-109	1.16555	0.56	0.243	1.10163e-104	GO:0006817;GO:0016021;GO:0005315	biological_process;cellular_component;molecular_function	BP:phosphate ion transport;CC:integral component of membrane;MF:inorganic phosphate transmembrane transporter activity	K08176	PHO84			ENOG410ZVN7	S:Function unknown	XP_031098582.1	inorganic phosphate transporter 1-4-like [Ipomoea triloba]	sp|Q96303|PHT14_ARATH	Inorganic phosphate transporter 1-4 OS=Arabidopsis thaliana OX=3702 GN=PHT1-4 PE=1 SV=1	PF00083.25;PF07690.17;PF06779.15	Sugar_tr;MFS_1;MFS_4	Sugar (and other) transporter;Major Facilitator Superfamily;Uncharacterised MFS-type transporter YbfB
g61055	5.34367e-116	1.16374	0.609	0.281	1.02257e-111	GO:0009579;GO:0016021	cellular_component;cellular_component	CC:thylakoid;CC:integral component of membrane					ENOG4112195	E:Amino acid transport and metabolism	XP_031118254.1	protein CURVATURE THYLAKOID 1C, chloroplastic isoform X2 [Ipomoea triloba]	sp|Q9M812|CUT1C_ARATH	Protein CURVATURE THYLAKOID 1C, chloroplastic OS=Arabidopsis thaliana OX=3702 GN=CURT1C PE=1 SV=1	PF14159.7	CAAD	CAAD domains of cyanobacterial aminoacyl-tRNA synthetase
g28261	1.30635e-191	1.16353	0.796	0.36	2.49983e-187	GO:0003700;GO:0006352	molecular_function;biological_process	MF:transcription factor activity, sequence-specific DNA binding;BP:DNA-templated transcription, initiation	MF:transcription factor activity, sequence-specific DNA binding;BP:DNA-templated transcription, initiation	rpoD			COG0568	K:Transcription	XP_031109252.1	RNA polymerase sigma factor sigA isoform X2 [Ipomoea triloba]	sp|O24629|SIGA_ARATH	RNA polymerase sigma factor sigA OS=Arabidopsis thaliana OX=3702 GN=SIGA PE=1 SV=1	PF04542.15;PF04539.17;PF04545.17	Sigma70_r2;Sigma70_r3;Sigma70_r4	Sigma-70 region 2;Sigma-70 region 3;Sigma-70, region 4
g39208	2.487e-214	1.16316	0.863	0.42	4.75913e-210	GO:0009535;GO:0016021;GO:0080183;GO:0048564	cellular_component;cellular_component;biological_process;biological_process	CC:chloroplast thylakoid membrane;CC:integral component of membrane;BP:response to photooxidative stress;BP:photosystem I assembly					ENOG41125AF	S:Function unknown	XP_031125287.1	ycf3-interacting protein 1, chloroplastic [Ipomoea triloba]	sp|E5KCJ8|Y3IP1_TOBAC	Ycf3-interacting protein 1, chloroplastic OS=Nicotiana tabacum OX=4097 PE=1 SV=2
g43361	3.18287e-39	1.16251	0.26	0.111	6.09073e-35	GO:0016021;GO:0009507	cellular_component;cellular_component	CC:integral component of membrane;CC:chloroplast					ENOG410YR46	S:Function unknown	XP_031114988.1	uncharacterized protein LOC116019052 [Ipomoea triloba]
g17456	7.22987e-217	1.1624	0.898	0.5	1.38351e-212	GO:0016021;GO:0043231;GO:0009451	cellular_component;cellular_component;biological_process	CC:integral component of membrane;CC:intracellular membrane-bounded organelle;BP:RNA modification					ENOG410Z7Z7	S:Function unknown	XP_031094775.1	pentatricopeptide repeat-containing protein At4g21300 isoform X2 [Ipomoea triloba]	sp|Q9STE1|PP333_ARATH	Pentatricopeptide repeat-containing protein At4g21300 OS=Arabidopsis thaliana OX=3702 GN=PCMP-E36 PE=3 SV=1	PF13041.7;PF01535.21;PF02943.16;PF12854.8;PF13812.7;PF17177.5	PPR_2;PPR;FeThRed_B;PPR_1;PPR_3;PPR_long	PPR repeat family;PPR repeat;Ferredoxin thioredoxin reductase catalytic beta chain;PPR repeat;Pentatricopeptide repeat domain;Pentacotripeptide-repeat region of PRORP
g1106	1.07924e-92	1.16127	0.517	0.227	2.06524e-88	GO:0031969;GO:0009535;GO:0009688;GO:0016021;GO:0016020;GO:0009540;GO:0071949;GO:0009507	cellular_component;cellular_component;biological_process;cellular_component;cellular_component;molecular_function;molecular_function;cellular_component	CC:chloroplast membrane;CC:chloroplast thylakoid membrane;BP:abscisic acid biosynthetic process;CC:integral component of membrane;CC:membrane;MF:zeaxanthin epoxidase [overall] activity;MF:FAD binding;CC:chloroplast	K09838	ZEP, ABA1	map00906	Carotenoid biosynthesis	COG0654;COG0654	C:Energy production and conversion;H:Coenzyme transport and metabolism	XP_031116309.1	zeaxanthin epoxidase, chloroplastic [Ipomoea triloba]	sp|Q40412|ABA2_NICPL	Zeaxanthin epoxidase, chloroplastic OS=Nicotiana plumbaginifolia OX=4092 GN=ABA2 PE=1 SV=1	PF01494.20;PF00498.27;PF07992.15;PF13450.7;PF00890.25	FAD_binding_3;FHA;Pyr_redox_2;NAD_binding_8;FAD_binding_2	FAD binding domain;FHA domain;Pyridine nucleotide-disulphide oxidoreductase;NAD(P)-binding Rossmann-like domain;FAD binding domain
g34775	7.22406e-53	1.16051	0.274	0.099	1.3824e-48	GO:0016787;GO:0047746;GO:0016746;GO:0015994;GO:0009507	molecular_function;molecular_function;molecular_function;biological_process;cellular_component	MF:hydrolase activity;MF:chlorophyllase activity;MF:transferase activity, transferring acyl groups;BP:chlorophyll metabolic process;CC:chloroplast					COG0596	S:Function unknown	XP_031129543.1	pheophytinase, chloroplastic isoform X1 [Ipomoea triloba]	sp|Q9FFZ1|PPH_ARATH	Pheophytinase, chloroplastic OS=Arabidopsis thaliana OX=3702 GN=PPH PE=1 SV=1	PF12697.8;PF12146.9;PF00561.21	Abhydrolase_6;Hydrolase_4;Abhydrolase_1	Alpha/beta hydrolase family;Serine aminopeptidase, S33;alpha/beta hydrolase fold
g4551	3.63918e-91	1.15953	0.496	0.208	6.96393e-87	GO:0009269;GO:0016021	biological_process;cellular_component	BP:response to desiccation;CC:integral component of membrane					ENOG4111USD	S:Function unknown	XP_031112485.1	uncharacterized protein LOC116016386 [Ipomoea triloba]			PF03168.14	LEA_2	Late embryogenesis abundant protein
g5403	5.44823e-113	1.15934	0.617	0.294	1.04257e-108	GO:0016021	cellular_component	CC:integral component of membrane					ENOG410YCTR	S:Function unknown	XP_031111500.1	uncharacterized protein LOC116015541 isoform X1 [Ipomoea triloba]
g44968	1.16601e-99	1.15819	0.53	0.23	2.23129e-95	GO:0052865;GO:0016114;GO:0009228;GO:0008661;GO:0046872;GO:0009507	biological_process;biological_process;biological_process;molecular_function;molecular_function;cellular_component	BP:1-deoxy-D-xylulose 5-phosphate biosynthetic process;BP:terpenoid biosynthetic process;BP:thiamine biosynthetic process;MF:1-deoxy-D-xylulose-5-phosphate synthase activity;MF:metal ion binding;CC:chloroplast	K01662	dxs	map00730;map00900	Thiamine metabolism;Terpenoid backbone biosynthesis	COG1154	H:Coenzyme transport and metabolism	XP_031125936.1	probable 1-deoxy-D-xylulose-5-phosphate synthase, chloroplastic [Ipomoea triloba]	sp|O78328|DXS_CAPAN	Probable 1-deoxy-D-xylulose-5-phosphate synthase, chloroplastic OS=Capsicum annuum OX=4072 GN=TKT2 PE=2 SV=1	PF13292.7;PF02780.21;PF02779.25;PF02775.22;PF00676.21;PF00456.22	DXP_synthase_N;Transketolase_C;Transket_pyr;TPP_enzyme_C;E1_dh;Transketolase_N	1-deoxy-D-xylulose-5-phosphate synthase;Transketolase, C-terminal domain;Transketolase, pyrimidine binding domain;Thiamine pyrophosphate enzyme, C-terminal TPP binding domain;Dehydrogenase E1 component;Transketolase, thiamine diphosphate binding domain
g63735	8.15152e-155	1.15239	0.762	0.374	1.55987e-150	GO:0003677	molecular_function	MF:DNA binding					COG0718	S:Function unknown	XP_031118204.1	nucleoid-associated protein At2g24020, chloroplastic-like [Ipomoea triloba]	sp|O82230|EBFC2_ARATH	Nucleoid-associated protein At2g24020, chloroplastic OS=Arabidopsis thaliana OX=3702 GN=STIC2 PE=1 SV=2	PF02575.17	YbaB_DNA_bd	YbaB/EbfC DNA-binding family
g50517	1.85135e-50	1.15171	0.326	0.143	3.54274e-46	GO:0016301	molecular_function	MF:kinase activity					COG0666	S:Function unknown	XP_031122284.1	uncharacterized protein LOC116025259 [Ipomoea triloba]			PF12796.8;PF13857.7;PF13637.7;PF00023.31	Ank_2;Ank_5;Ank_4;Ank	Ankyrin repeats (3 copies;Ankyrin repeats (many copies;Ankyrin repeats (many copies;Ankyrin repeat
g55677	3.13268e-97	1.15159	0.481	0.189	5.99471e-93	GO:0016787;GO:0016021;GO:0071522	molecular_function;cellular_component;molecular_function	MF:hydrolase activity;CC:integral component of membrane;MF:ureidoglycine aminohydrolase activity	K14977	ylbA, UGHY	map00230	Purine metabolism	COG3257	S:Function unknown	XP_031128205.1	(S)-ureidoglycine aminohydrolase [Ipomoea triloba]	sp|Q8GXV5|UGHY_ARATH	(S)-ureidoglycine aminohydrolase OS=Arabidopsis thaliana OX=3702 GN=UGLYAH PE=1 SV=1	PF07883.12;PF02311.20;PF05899.13	Cupin_2;AraC_binding;Cupin_3	Cupin domain;AraC-like ligand binding domain;Protein of unknown function (DUF861
g35337	6.17914e-50	1.15127	0.294	0.117	1.18244e-45								ENOG4111MP0	S:Function unknown	XP_031130195.1	uncharacterized protein At4g14100-like [Ipomoea triloba]	sp|Q67YC9|Y4141_ARATH	Uncharacterized protein At4g14100 OS=Arabidopsis thaliana OX=3702 GN=At4g14100 PE=2 SV=1
g54432	9.55871e-107	1.1507	0.566	0.248	1.82915e-102	GO:0006949;GO:0016021;GO:0005576;GO:0019953;GO:0009506	biological_process;cellular_component;cellular_component;biological_process;cellular_component	BP:syncytium formation;CC:integral component of membrane;CC:extracellular region;BP:sexual reproduction;CC:plasmodesma	K20628	exlX			ENOG410YA5Q	G:Carbohydrate transport and metabolism	XP_031104528.1	expansin-B3 [Ipomoea triloba]	sp|Q9M0I2|EXPB3_ARATH	Expansin-B3 OS=Arabidopsis thaliana OX=3702 GN=EXPB3 PE=2 SV=2	PF01357.22;PF03330.19	Expansin_C;DPBB_1	Expansin C-terminal domain;Lytic transglycolase
g42315	4.50912e-132	1.15069	0.64	0.282	8.62866e-128	GO:0009642	biological_process	BP:response to light intensity					ENOG410YS58	S:Function unknown	XP_031112555.1	uncharacterized protein LOC116016435 [Ipomoea triloba]	sp|Q9FEC1|OHP2_ARATH	Light-harvesting complex-like protein OHP2, chloroplastic OS=Arabidopsis thaliana OX=3702 GN=OHP2 PE=2 SV=1
g39175	5.47785e-67	1.15064	0.41	0.177	1.04824e-62	GO:0005783;GO:0016813;GO:0016021;GO:0010136;GO:0047652;GO:0006145;GO:0008237	cellular_component;molecular_function;cellular_component;biological_process;molecular_function;biological_process;molecular_function	CC:endoplasmic reticulum;MF:hydrolase activity, acting on carbon-nitrogen (but not peptide) bonds, in linear amidines;CC:integral component of membrane;BP:ureide catabolic process;MF:allantoate deiminase activity;BP:purine nucleobase catabolic process;MF:metallopeptidase activity	K02083	allC	map00230	Purine metabolism	COG0624	P:Inorganic ion transport and metabolism	XP_031125285.1	allantoate deiminase 2 [Ipomoea triloba]	sp|C0M0V4|AAH1_SOYBN	Allantoate deiminase 1 OS=Glycine max OX=3847 GN=AAH1 PE=1 SV=1	PF01546.29;PF04389.18	Peptidase_M20;Peptidase_M28	Peptidase family M20/M25/M40;Peptidase family M28
g463	1.78719e-83	1.14817	0.454	0.189	3.41997e-79	GO:0090143;GO:0016021;GO:0016020;GO:0010190;GO:0010020;GO:0009507	biological_process;cellular_component;cellular_component;biological_process;biological_process;cellular_component	BP:nucleoid organization;CC:integral component of membrane;CC:membrane;BP:cytochrome b6f complex assembly;BP:chloroplast fission;CC:chloroplast					COG0762	S:Function unknown	XP_031117498.1	ylmG homolog protein 1-2, chloroplastic-like [Ipomoea triloba]	sp|Q9SRS3|YMG11_ARATH	YlmG homolog protein 1-1, chloroplastic OS=Arabidopsis thaliana OX=3702 GN=YLMG1-1 PE=2 SV=1	PF02325.18	YGGT	YGGT family
g54780	1.15003e-89	1.1479	0.458	0.185	2.20069e-85								ENOG410YWAU	S:Function unknown	XP_019193403.1	PREDICTED: uncharacterized protein LOC109187622 [Ipomoea nil]
g765	3.98733e-72	1.1477	0.4	0.165	7.63015e-68	GO:0003924;GO:0005525;GO:0019904;GO:0045727;GO:0006412;GO:0009507	molecular_function;molecular_function;molecular_function;biological_process;biological_process;cellular_component	MF:GTPase activity;MF:GTP binding;MF:protein domain specific binding;BP:positive regulation of translation;BP:translation;CC:chloroplast	K21594	GUF1			COG0481	M:Cell wall/membrane/envelope biogenesis	XP_019177224.1	PREDICTED: translation factor GUF1 homolog, chloroplastic [Ipomoea nil]	sp|A5B4D2|GUFP_VITVI	Translation factor GUF1 homolog, chloroplastic OS=Vitis vinifera OX=29760 GN=VITISV_013255 PE=3 SV=1	PF00009.28;PF06421.13;PF00679.25;PF03144.26;PF01926.24;PF00071.23;PF14492.7;PF16658.6	GTP_EFTU;LepA_C;EFG_C;GTP_EFTU_D2;MMR_HSR1;Ras;EFG_III;RF3_C	Elongation factor Tu GTP binding domain;GTP-binding protein LepA C-terminus;Elongation factor G C-terminus;Elongation factor Tu domain 2;50S ribosome-binding GTPase;Ras family;Elongation Factor G, domain III;Class II release factor RF3, C-terminal domain
g35290	1.45879e-142	1.14674	0.656	0.278	2.79154e-138								ENOG410Y5KQ	S:Function unknown	XP_019169792.1	PREDICTED: uncharacterized protein LOC109165468 [Ipomoea nil]
g31545	4.89334e-57	1.14514	0.323	0.128	9.3639e-53	GO:0009570	cellular_component	CC:chloroplast stroma					ENOG410XSNM	S:Function unknown	XP_031092484.1	protein LOW PSII ACCUMULATION 3, chloroplastic [Ipomoea triloba]	sp|Q8H0W0|LPA3_ARATH	Protein LOW PSII ACCUMULATION 3, chloroplastic OS=Arabidopsis thaliana OX=3702 GN=LPA3 PE=1 SV=1	PF09353.11	DUF1995	Domain of unknown function (DUF1995
g54876	1.21638e-233	1.14374	0.92	0.547	2.32766e-229	GO:0016311;GO:0016791	biological_process;molecular_function	BP:dephosphorylation;MF:phosphatase activity	K19269	PGP, PGLP	map00630	Glyoxylate and dicarboxylate metabolism	COG0647	S:Function unknown	XP_031106056.1	phosphoglycolate phosphatase 1B, chloroplastic-like [Ipomoea triloba]	sp|P0DKC3|PGP1A_ARATH	Phosphoglycolate phosphatase 1A, chloroplastic OS=Arabidopsis thaliana OX=3702 GN=PGLP1A PE=1 SV=1	PF13344.7;PF13242.7;PF00702.27;PF13419.7;PF09419.11	Hydrolase_6;Hydrolase_like;Hydrolase;HAD_2;PGP_phosphatase	Haloacid dehalogenase-like hydrolase;HAD-hyrolase-like;haloacid dehalogenase-like hydrolase;Haloacid dehalogenase-like hydrolase;Mitochondrial PGP phosphatase
g32564	1.06968e-71	1.14197	0.432	0.19	2.04695e-67	GO:0031969;GO:0009570;GO:0005634;GO:0005774;GO:0003727;GO:1901918;GO:0009507;GO:0006417;GO:0010114;GO:0006397;GO:0006396;GO:0043621;GO:0009657	cellular_component;cellular_component;cellular_component;cellular_component;molecular_function;biological_process;cellular_component;biological_process;biological_process;biological_process;biological_process;molecular_function;biological_process	CC:chloroplast membrane;CC:chloroplast stroma;CC:nucleus;CC:vacuolar membrane;MF:single-stranded RNA binding;BP:negative regulation of exoribonuclease activity;CC:chloroplast;BP:regulation of translation;BP:response to red light;BP:mRNA processing;BP:RNA processing;MF:protein self-association;BP:plastid organization					COG0457	G:Carbohydrate transport and metabolism	XP_031091831.1	protein high chlorophyll fluorescent 107 [Ipomoea triloba]	sp|Q8RWG2|CF107_ARATH	Protein high chlorophyll fluorescent 107 OS=Arabidopsis thaliana OX=3702 GN=HCF107 PE=1 SV=1	PF07719.18;PF13428.7;PF13424.7;PF14559.7	TPR_2;TPR_14;TPR_12;TPR_19	Tetratricopeptide repeat;Tetratricopeptide repeat;Tetratricopeptide repeat;Tetratricopeptide repeat
g55040	8.60654e-249	1.14092	0.97	0.638	1.64695e-244	GO:0009536;GO:0006457;GO:0046914;GO:0051085;GO:0051087;GO:0051082;GO:1901671;GO:0005759;GO:0046872;GO:0005524;GO:0009507	cellular_component;biological_process;molecular_function;biological_process;molecular_function;molecular_function;biological_process;cellular_component;molecular_function;molecular_function;cellular_component	CC:plastid;BP:protein folding;MF:transition metal ion binding;BP:chaperone mediated protein folding requiring cofactor;MF:chaperone binding;MF:unfolded protein binding;BP:positive regulation of superoxide dismutase activity;CC:mitochondrial matrix;MF:metal ion binding;MF:ATP binding;CC:chloroplast	K04078	groES, HSPE1			COG0234	K:Transcription	XP_031105755.1	20 kDa chaperonin, chloroplastic [Ipomoea triloba]	sp|O65282|CH20_ARATH	20 kDa chaperonin, chloroplastic OS=Arabidopsis thaliana OX=3702 GN=CPN20 PE=1 SV=2	PF00166.22	Cpn10	Chaperonin 10 Kd subunit
g38350	7.05282e-165	1.13918	0.779	0.394	1.34963e-160	GO:0016020;GO:0071586;GO:0016021;GO:0004197	cellular_component;biological_process;cellular_component;molecular_function	CC:membrane;BP:CAAX-box protein processing;CC:integral component of membrane;MF:cysteine-type endopeptidase activity					ENOG4110127	S:Function unknown	XP_031125417.1	uncharacterized protein LOC116027800 [Ipomoea triloba]			PF02517.17	CPBP	CPBP intramembrane metalloprotease
g51122	7.26619e-96	1.13837	0.55	0.25	1.39046e-91	GO:0005623;GO:0009902	cellular_component;biological_process	CC:cell;BP:chloroplast relocation					ENOG410Y932	S:Function unknown	XP_031122147.1	protein PLASTID MOVEMENT IMPAIRED 1 [Ipomoea triloba]	sp|Q9C8E6|PMI1_ARATH	Protein PLASTID MOVEMENT IMPAIRED 1 OS=Arabidopsis thaliana OX=3702 GN=PMI1 PE=1 SV=1	PF10358.10	NT-C2	N-terminal C2 in EEIG1 and EHBP1 proteins
g8787	1.045e-78	1.13817	0.429	0.176	1.99972e-74	GO:0016209;GO:0055114;GO:0009507	molecular_function;biological_process;cellular_component	MF:antioxidant activity;BP:oxidation-reduction process;CC:chloroplast					ENOG410XVW9;ENOG4111FTR	O:Posttranslational modification, protein turnover, chaperones;O:Posttranslational modification, protein turnover, chaperones	XP_031111651.1	thioredoxin-like protein AAED1, chloroplastic [Ipomoea triloba]	sp|Q9ZUU2|PXL2C_ARATH	Thioredoxin-like protein AAED1, chloroplastic OS=Arabidopsis thaliana OX=3702 GN=At2g37240 PE=1 SV=2	PF13911.7;PF00578.22;PF08534.11	AhpC-TSA_2;AhpC-TSA;Redoxin	AhpC/TSA antioxidant enzyme;AhpC/TSA family;Redoxin
g42751	2.44164e-66	1.13693	0.404	0.171	4.67232e-62	GO:0016787;GO:0003824	molecular_function;molecular_function	MF:hydrolase activity;MF:catalytic activity					COG0596	S:Function unknown	XP_031132294.1	uncharacterized protein LOC116033676 [Ipomoea triloba]	sp|O05235|YUGF_BACSU	Uncharacterized hydrolase YugF OS=Bacillus subtilis (strain 168) OX=224308 GN=yugF PE=3 SV=1	PF12146.9;PF00561.21;PF12697.8	Hydrolase_4;Abhydrolase_1;Abhydrolase_6	Serine aminopeptidase, S33;alpha/beta hydrolase fold;Alpha/beta hydrolase family
g2187	1.04617e-45	1.13672	0.316	0.142	2.00194e-41	GO:0003735;GO:0046872;GO:0006412;GO:0005840	molecular_function;molecular_function;biological_process;cellular_component	MF:structural constituent of ribosome;MF:metal ion binding;BP:translation;CC:ribosome	K02978	RP-S27e, RPS27	map03010	Ribosome	COG2051;ENOG410XU84	J:Translation, ribosomal structure and biogenesis;S:Function unknown	XP_010926238.2	40S ribosomal protein S27-2 [Elaeis guineensis]	sp|Q9M2F1|RS272_ARATH	40S ribosomal protein S27-2 OS=Arabidopsis thaliana OX=3702 GN=RPS27B PE=2 SV=2	PF01667.18	Ribosomal_S27e	Ribosomal protein S27
g59568	3.85113e-124	1.13509	0.656	0.325	7.36952e-120	GO:0033743;GO:0046872;GO:0006979;GO:0030091	molecular_function;molecular_function;biological_process;biological_process	MF:peptide-methionine (R)-S-oxide reductase activity;MF:metal ion binding;BP:response to oxidative stress;BP:protein repair	K07305	msrB			COG0229	Q:Secondary metabolites biosynthesis, transport and catabolism	XP_031128788.1	peptide methionine sulfoxide reductase B5-like [Ipomoea triloba]	sp|Q9C5C8|MSRB2_ARATH	Peptide methionine sulfoxide reductase B2, chloroplastic OS=Arabidopsis thaliana OX=3702 GN=MSRB2 PE=1 SV=1	PF01641.19	SelR	SelR domain
g20519	3.42063e-108	1.1347	0.558	0.241	6.54573e-104	GO:0009579;GO:0009941;GO:0019538;GO:0009570;GO:0008233;GO:0005524	cellular_component;cellular_component;biological_process;cellular_component;molecular_function;molecular_function	CC:thylakoid;CC:chloroplast envelope;BP:protein metabolic process;CC:chloroplast stroma;MF:peptidase activity;MF:ATP binding					COG0542	S:Function unknown	XP_031093690.1	ATP-dependent Clp protease ATP-binding subunit CLPT1, chloroplastic-like [Ipomoea triloba]	sp|Q93WL3|CLPT1_ARATH	ATP-dependent Clp protease ATP-binding subunit CLPT1, chloroplastic OS=Arabidopsis thaliana OX=3702 GN=CLPT1 PE=1 SV=1	PF02861.21	Clp_N	Clp amino terminal domain, pathogenicity island component
g23987	4.38204e-113	1.13168	0.58	0.259	8.38546e-109	GO:0016021;GO:0044070;GO:0008308	cellular_component;biological_process;molecular_function	CC:integral component of membrane;BP:regulation of anion transport;MF:voltage-gated anion channel activity					ENOG4111ZXC	U:Intracellular trafficking, secretion, and vesicular transport	XP_031102596.1	outer envelope pore protein 21B, chloroplastic-like [Ipomoea triloba]	sp|Q9FPG2|OP21B_ARATH	Outer envelope pore protein 21B, chloroplastic OS=Arabidopsis thaliana OX=3702 GN=OEP21B PE=2 SV=1
g41750	8.16909e-116	1.13151	0.591	0.259	1.56324e-111	GO:0008233	molecular_function	MF:peptidase activity					COG2802	O:Posttranslational modification, protein turnover, chaperones	XP_031105594.1	uncharacterized protein LOC116010335 [Ipomoea triloba]	sp|P36774|LON2_MYXXA	Lon protease 2 OS=Myxococcus xanthus OX=34 GN=lon2 PE=1 SV=3	PF02190.17	LON_substr_bdg	ATP-dependent protease La (LON) substrate-binding domain
g49936	3.11533e-209	1.13036	0.88	0.481	5.9615e-205	GO:0005737;GO:0009509;GO:0009570;GO:0016829;GO:0009860;GO:0004124;GO:0009567;GO:0006535;GO:0030170	cellular_component;cellular_component;cellular_component;molecular_function;biological_process;molecular_function;biological_process;biological_process;molecular_function	CC:cytoplasm;CC:chromoplast;CC:chloroplast stroma;MF:lyase activity;BP:pollen tube growth;MF:cysteine synthase activity;BP:double fertilization forming a zygote and endosperm;BP:cysteine biosynthetic process from serine;MF:pyridoxal phosphate binding	K01738	cysK	map00270;map00920	Cysteine and methionine metabolism;Sulfur metabolism	COG0031	S:Function unknown	XP_031122771.1	cysteine synthase, chloroplastic/chromoplastic-like isoform X1 [Ipomoea triloba]	sp|O81155|CYSKP_SOLTU	Cysteine synthase, chloroplastic/chromoplastic OS=Solanum tuberosum OX=4113 PE=2 SV=1	PF00291.26	PALP	Pyridoxal-phosphate dependent enzyme
g56192	4.06117e-38	1.12992	0.252	0.107	7.77145e-34	GO:0016021;GO:0004672;GO:0005524;GO:0005886;GO:0046777;GO:0009506	cellular_component;molecular_function;molecular_function;cellular_component;biological_process;cellular_component	CC:integral component of membrane;MF:protein kinase activity;MF:ATP binding;CC:plasma membrane;BP:protein autophosphorylation;CC:plasmodesma					ENOG410XPGM	T:Signal transduction mechanisms	XP_031128936.1	probable inactive leucine-rich repeat receptor-like protein kinase At3g03770 isoform X1 [Ipomoea triloba]	sp|Q8LFN2|Y3037_ARATH	Probable inactive leucine-rich repeat receptor-like protein kinase At3g03770 OS=Arabidopsis thaliana OX=3702 GN=At3g03770 PE=1 SV=1	PF07714.18;PF00069.26;PF13855.7;PF12799.8	PK_Tyr_Ser-Thr;Pkinase;LRR_8;LRR_4	Protein tyrosine and serine/threonine kinase;Protein kinase domain;Leucine rich repeat;Leucine Rich repeats (2 copies
g55222	1.4042e-80	1.12609	0.432	0.173	2.68707e-76	GO:0003700;GO:0005634;GO:0046872;GO:0003676	molecular_function;cellular_component;molecular_function;molecular_function	MF:transcription factor activity, sequence-specific DNA binding;CC:nucleus;MF:metal ion binding;MF:nucleic acid binding	MF:transcription factor activity, sequence-specific DNA binding;CC:nucleus;MF:metal ion binding;MF:nucleic acid binding				COG5048	S:Function unknown	XP_031105584.1	protein indeterminate-domain 7-like [Ipomoea triloba]	sp|Q8H1F5|IDD7_ARATH	Protein indeterminate-domain 7 OS=Arabidopsis thaliana OX=3702 GN=IDD7 PE=2 SV=1	PF00096.27;PF12171.9;PF13912.7	zf-C2H2;zf-C2H2_jaz;zf-C2H2_6	Zinc finger, C2H2 type;Zinc-finger double-stranded RNA-binding;C2H2-type zinc finger
g36554	2.89904e-138	1.12585	0.715	0.347	5.54761e-134	GO:0005524;GO:0004672	molecular_function;molecular_function	MF:ATP binding;MF:protein kinase activity					ENOG410XPP3	T:Signal transduction mechanisms	XP_031130905.1	serine/threonine-protein kinase STN7, chloroplastic [Ipomoea triloba]	sp|Q9S713|STT7_ARATH	Serine/threonine-protein kinase STN7, chloroplastic OS=Arabidopsis thaliana OX=3702 GN=STN7 PE=1 SV=1	PF00069.26;PF07714.18;PF01636.24;PF17667.2	Pkinase;PK_Tyr_Ser-Thr;APH;Pkinase_fungal	Protein kinase domain;Protein tyrosine and serine/threonine kinase;Phosphotransferase enzyme family;Fungal protein kinase
g42961	3.27328e-69	1.124	0.424	0.187	6.26374e-65	GO:0015930;GO:0006537;GO:0019676;GO:0016491	molecular_function;biological_process;biological_process;molecular_function	MF:glutamate synthase activity;BP:glutamate biosynthetic process;BP:ammonia assimilation cycle;MF:oxidoreductase activity	K00284	GLU, gltS	map00630;map00910	Glyoxylate and dicarboxylate metabolism;Nitrogen metabolism	COG0067	E:Amino acid transport and metabolism	XP_031121832.1	ferredoxin-dependent glutamate synthase, chloroplastic [Ipomoea triloba]	sp|Q43155|GLTB_SPIOL	Ferredoxin-dependent glutamate synthase, chloroplastic OS=Spinacia oleracea OX=3562 GN=FdGOGAT PE=1 SV=3	PF00310.22;PF01645.18;PF04898.15;PF01493.20	GATase_2;Glu_synthase;Glu_syn_central;GXGXG	Glutamine amidotransferases class-II;Conserved region in glutamate synthase;Glutamate synthase central domain;GXGXG motif
g34710	5.14923e-64	1.12203	0.377	0.16	9.85357e-60	GO:0004252	molecular_function	MF:serine-type endopeptidase activity					COG1404	O:Posttranslational modification, protein turnover, chaperones	XP_031130497.1	subtilisin-like protease SBT5.6 [Ipomoea triloba]	sp|Q9FK76|SBT56_ARATH	Subtilisin-like protease SBT5.6 OS=Arabidopsis thaliana OX=3702 GN=SBT5.6 PE=2 SV=1	PF00082.23;PF17766.2;PF02225.23	Peptidase_S8;fn3_6;PA	Subtilase family;Fibronectin type-III domain;PA domain
g31051	6.21647e-40	1.12136	0.277	0.123	1.18958e-35	GO:0016021	cellular_component	CC:integral component of membrane					ENOG4111G6Y	S:Function unknown	XP_031092116.1	uncharacterized protein LOC115996833 [Ipomoea triloba]			PF13396.7	PLDc_N	Phospholipase_D-nuclease N-terminal
g11681	2.22199e-144	1.11809	0.722	0.354	4.252e-140	GO:0005347;GO:0016021;GO:0003712;GO:0006357;GO:0015367;GO:0016592	molecular_function;cellular_component;molecular_function;biological_process;molecular_function;cellular_component	MF:ATP transmembrane transporter activity;CC:integral component of membrane;MF:transcription cofactor activity;BP:regulation of transcription from RNA polymerase II promoter;MF:oxoglutarate;CC:mediator complex	MF:ATP transmembrane transporter activity;CC:integral component of membrane;MF:transcription cofactor activity;BP:regulation of transcription from RNA polymerase II promoter;MF:oxoglutarate;CC:mediator complex	SLC25A11, OGC			ENOG410XQHU	S:Function unknown	XP_031099319.1	mitochondrial dicarboxylate/tricarboxylate transporter DTC-like [Ipomoea triloba]	sp|Q9C5M0|DTC_ARATH	Mitochondrial dicarboxylate/tricarboxylate transporter DTC OS=Arabidopsis thaliana OX=3702 GN=DTC PE=1 SV=1	PF00153.28	Mito_carr	Mitochondrial carrier protein
g23740	2.40499e-69	1.11592	0.377	0.152	4.60219e-65	GO:0019898;GO:0009654;GO:0005509;GO:0009507;GO:0015979	cellular_component;cellular_component;molecular_function;cellular_component;biological_process	CC:extrinsic component of membrane;CC:photosystem II oxygen evolving complex;MF:calcium ion binding;CC:chloroplast;BP:photosynthesis					ENOG411019B	S:Function unknown	XP_031101690.1	uncharacterized protein LOC116005589 isoform X1 [Ipomoea triloba]			PF01789.17	PsbP	PsbP
g54109	9.00709e-174	1.1148	0.823	0.426	1.7236e-169	GO:0008270	molecular_function	MF:zinc ion binding					ENOG410YSB4	S:Function unknown	XP_031104661.1	B-box zinc finger protein 23-like [Ipomoea triloba]	sp|Q1G3I2|MIP1A_ARATH	B-box domain protein 30 OS=Arabidopsis thaliana OX=3702 GN=MIP1A PE=1 SV=1
g38835	1.48892e-77	1.11385	0.489	0.229	2.8492e-73								ENOG4111C0Z	S:Function unknown	XP_031123907.1	conglutin alpha 2-like [Ipomoea triloba]
g14620	4.77154e-36	1.11314	0.272	0.124	9.13081e-32	GO:0009570;GO:0004366;GO:0016024;GO:0102420	cellular_component;molecular_function;biological_process;molecular_function	CC:chloroplast stroma;MF:glycerol-3-phosphate O-acyltransferase activity;BP:CDP-diacylglycerol biosynthetic process;MF:sn-1-glycerol-3-phosphate C16	K00630	ATS1	map00564;map00561	Glycerophospholipid metabolism;Glycerolipid metabolism	ENOG410YK2C	I:Lipid transport and metabolism	XP_031098462.1	glycerol-3-phosphate acyltransferase ATS12, chloroplastic-like [Ipomoea triloba]	sp|Q39639|PLSB_CUCSA	Glycerol-3-phosphate acyltransferase, chloroplastic OS=Cucumis sativus OX=3659 PE=2 SV=1	PF01553.22;PF14829.7	Acyltransferase;GPAT_N	Acyltransferase;Glycerol-3-phosphate acyltransferase N-terminal
g193	1.93212e-59	1.11201	0.376	0.163	3.69731e-55	GO:0009535;GO:0005623;GO:0016671;GO:0003756;GO:0045454;GO:0010190;GO:0009507	cellular_component;cellular_component;molecular_function;molecular_function;biological_process;biological_process;cellular_component	CC:chloroplast thylakoid membrane;CC:cell;MF:oxidoreductase activity, acting on a sulfur group of donors, disulfide as acceptor;MF:protein disulfide isomerase activity;BP:cell redox homeostasis;BP:cytochrome b6f complex assembly;CC:chloroplast					COG0526	S:Function unknown	XP_031116381.1	thioredoxin-like protein HCF164, chloroplastic isoform X1 [Ipomoea triloba]	sp|Q7Y0D4|TR164_ORYSJ	Thioredoxin-like protein HCF164, chloroplastic OS=Oryza sativa subsp. japonica OX=39947 GN=Os03g0767500 PE=2 SV=1	PF00085.21;PF13899.7;PF13098.7;PF13905.7;PF08534.11;PF00578.22	Thioredoxin;Thioredoxin_7;Thioredoxin_2;Thioredoxin_8;Redoxin;AhpC-TSA	Thioredoxin;Thioredoxin-like;Thioredoxin-like domain;Thioredoxin-like;Redoxin;AhpC/TSA family
g1477	7.02959e-91	1.11151	0.519	0.231	1.34518e-86	GO:0004252	molecular_function	MF:serine-type endopeptidase activity	K01358	clpP, CLPP			COG0740	O:Posttranslational modification, protein turnover, chaperones	XP_031117626.1	ATP-dependent Clp protease proteolytic subunit 3, chloroplastic [Ipomoea triloba]	sp|Q9SXJ6|CLPP3_ARATH	ATP-dependent Clp protease proteolytic subunit 3, chloroplastic OS=Arabidopsis thaliana OX=3702 GN=CLPP3 PE=1 SV=1	PF00574.24	CLP_protease	Clp protease
g57028	3.43416e-65	1.11144	0.361	0.144	6.5716e-61	GO:0003700;GO:0016987;GO:0009507;GO:0006352;GO:0003677	molecular_function;molecular_function;cellular_component;biological_process;molecular_function	MF:transcription factor activity, sequence-specific DNA binding;MF:sigma factor activity;CC:chloroplast;BP:DNA-templated transcription, initiation;MF:DNA binding	MF:transcription factor activity, sequence-specific DNA binding;MF:sigma factor activity;CC:chloroplast;BP:DNA-templated transcription, initiation;MF:DNA binding				COG0568	L:Replication, recombination and repair	XP_019178801.1	PREDICTED: RNA polymerase sigma factor sigB [Ipomoea nil]	sp|O22056|SIGB_ARATH	RNA polymerase sigma factor sigB OS=Arabidopsis thaliana OX=3702 GN=SIGB PE=2 SV=2	PF04542.15;PF04539.17;PF04545.17	Sigma70_r2;Sigma70_r3;Sigma70_r4	Sigma-70 region 2;Sigma-70 region 3;Sigma-70, region 4
g20467	3.59275e-137	1.11057	0.716	0.364	6.87509e-133	GO:0016021	cellular_component	CC:integral component of membrane					ENOG4110IJH	L:Replication, recombination and repair	APG21184.1	orange protein [Ipomoea batatas]	sp|Q9FKF4|ORANG_ARATH	Protein ORANGE, chloroplastic OS=Arabidopsis thaliana OX=3702 GN=OR PE=1 SV=1
g2433	3.30533e-124	1.11033	0.619	0.273	6.32507e-120				K03969	pspA			COG1842;COG1842	K:Transcription;T:Signal transduction mechanisms	XP_031116426.1	probable membrane-associated 30 kDa protein, chloroplastic [Ipomoea triloba]	sp|Q8S0J7|IM30_ORYSJ	Probable membrane-associated 30 kDa protein, chloroplastic OS=Oryza sativa subsp. japonica OX=39947 GN=Os01g0895100 PE=1 SV=1	PF04012.13	PspA_IM30	PspA/IM30 family
g54990	3.12869e-101	1.10824	0.582	0.273	5.98707e-97	GO:0052865;GO:0016114;GO:0009228;GO:0008661;GO:0046872;GO:0009507	biological_process;biological_process;biological_process;molecular_function;molecular_function;cellular_component	BP:1-deoxy-D-xylulose 5-phosphate biosynthetic process;BP:terpenoid biosynthetic process;BP:thiamine biosynthetic process;MF:1-deoxy-D-xylulose-5-phosphate synthase activity;MF:metal ion binding;CC:chloroplast	K01662	dxs	map00730;map00900	Thiamine metabolism;Terpenoid backbone biosynthesis	COG1154	H:Coenzyme transport and metabolism	XP_031105695.1	probable 1-deoxy-D-xylulose-5-phosphate synthase, chloroplastic [Ipomoea triloba]	sp|O78328|DXS_CAPAN	Probable 1-deoxy-D-xylulose-5-phosphate synthase, chloroplastic OS=Capsicum annuum OX=4072 GN=TKT2 PE=2 SV=1	PF13292.7;PF02780.21;PF02779.25;PF02775.22;PF00676.21;PF00456.22	DXP_synthase_N;Transketolase_C;Transket_pyr;TPP_enzyme_C;E1_dh;Transketolase_N	1-deoxy-D-xylulose-5-phosphate synthase;Transketolase, C-terminal domain;Transketolase, pyrimidine binding domain;Thiamine pyrophosphate enzyme, C-terminal TPP binding domain;Dehydrogenase E1 component;Transketolase, thiamine diphosphate binding domain
g31384	3.25251e-112	1.10534	0.612	0.278	6.22401e-108	GO:0045041;GO:0005829;GO:0006458;GO:0051082;GO:0042026;GO:0005524	biological_process;cellular_component;biological_process;molecular_function;biological_process;molecular_function	BP:protein import into mitochondrial intermembrane space;CC:cytosol;BP:'de novo' protein folding;MF:unfolded protein binding;BP:protein refolding;MF:ATP binding	K04077	groEL, HSPD1	map03018	RNA degradation	COG0459	S:Function unknown	XP_031091862.1	ruBisCO large subunit-binding protein subunit beta, chloroplastic-like [Ipomoea triloba]	sp|P08927|RUBB_PEA	RuBisCO large subunit-binding protein subunit beta, chloroplastic OS=Pisum sativum OX=3888 PE=1 SV=2	PF00118.25	Cpn60_TCP1	TCP-1/cpn60 chaperonin family
g308	8.10711e-41	1.10359	0.278	0.124	1.55138e-36								ENOG410Z7Z7	S:Function unknown	XP_031116423.1	protein LOW PHOTOSYNTHETIC EFFICIENCY 1, chloroplastic-like [Ipomoea triloba]	sp|Q9SNB7|PP264_ARATH	Pentatricopeptide repeat-containing protein At3g46610 OS=Arabidopsis thaliana OX=3702 GN=At3g46610 PE=2 SV=1	PF13041.7;PF13812.7;PF01535.21;PF17177.5;PF12854.8	PPR_2;PPR_3;PPR;PPR_long;PPR_1	PPR repeat family;Pentatricopeptide repeat domain;PPR repeat;Pentacotripeptide-repeat region of PRORP;PPR repeat
g34430	4.79489e-93	1.10226	0.547	0.249	9.17549e-89								ENOG410YUXP	S:Function unknown	XP_031129550.1	uncharacterized protein LOC116031470 [Ipomoea triloba]			PF04520.14	Senescence_reg	Senescence regulator
g25157	3.15505e-202	1.10195	0.888	0.521	6.0375e-198	GO:0005737;GO:0005623;GO:0004601;GO:0042744;GO:0008379;GO:0034599;GO:0051920;GO:0045454	cellular_component;cellular_component;molecular_function;biological_process;molecular_function;biological_process;molecular_function;biological_process	CC:cytoplasm;CC:cell;MF:peroxidase activity;BP:hydrogen peroxide catabolic process;MF:thioredoxin peroxidase activity;BP:cellular response to oxidative stress;MF:peroxiredoxin activity;BP:cell redox homeostasis					COG0678	O:Posttranslational modification, protein turnover, chaperones	XP_031102265.1	peroxiredoxin-2E-1, chloroplastic [Ipomoea triloba]	sp|Q69TY4|PR2E1_ORYSJ	Peroxiredoxin-2E-1, chloroplastic OS=Oryza sativa subsp. japonica OX=39947 GN=PRXIIE-1 PE=2 SV=1	PF08534.11;PF00578.22	Redoxin;AhpC-TSA	Redoxin;AhpC/TSA family
g40236	3.9849e-47	1.10064	0.306	0.131	7.62551e-43	GO:0034440;GO:0031408;GO:0046872;GO:0016702	biological_process;biological_process;molecular_function;molecular_function	BP:lipid oxidation;BP:oxylipin biosynthetic process;MF:metal ion binding;MF:oxidoreductase activity, acting on single donors with incorporation of molecular oxygen, incorporation of two atoms of oxygen	K00454	LOX2S	map00591;map00592	Linoleic acid metabolism;alpha-Linolenic acid metabolism	ENOG410YN4N	S:Function unknown	XP_031124546.1	lipoxygenase 6, chloroplastic isoform X1 [Ipomoea triloba]	sp|Q9CAG3|LOX6_ARATH	Lipoxygenase 6, chloroplastic OS=Arabidopsis thaliana OX=3702 GN=LOX6 PE=2 SV=1	PF00305.20	Lipoxygenase	Lipoxygenase
g50296	1.15683e-87	1.10054	0.506	0.222	2.21371e-83	GO:0008198;GO:0008199;GO:0046872;GO:0003993	molecular_function;molecular_function;molecular_function;molecular_function	MF:ferrous iron binding;MF:ferric iron binding;MF:metal ion binding;MF:acid phosphatase activity	K14379	ACP5	map00740	Riboflavin metabolism	COG1409	S:Function unknown	XP_031121471.1	purple acid phosphatase 3-like [Ipomoea triloba]	sp|Q8H129|PPA3_ARATH	Purple acid phosphatase 3 OS=Arabidopsis thaliana OX=3702 GN=PAP3 PE=2 SV=1	PF00149.29	Metallophos	Calcineurin-like phosphoesterase
g21704	7.82684e-117	1.10052	0.624	0.291	1.49774e-112	GO:0031969;GO:0016021	cellular_component;cellular_component	CC:chloroplast membrane;CC:integral component of membrane					ENOG4111GFU	S:Function unknown	XP_031101559.1	protein TIC 20-I, chloroplastic-like [Ipomoea triloba]	sp|Q8GZ79|TI201_ARATH	Protein TIC 20-I, chloroplastic OS=Arabidopsis thaliana OX=3702 GN=TIC20-I PE=1 SV=1	PF16166.6	TIC20	Chloroplast import apparatus Tic20-like
g35227	2.39221e-73	1.10016	0.406	0.166	4.57774e-69	GO:0005737	cellular_component	CC:cytoplasm	K03255	TIF31, CLU1			ENOG410XQUQ	L:Replication, recombination and repair	XP_031130879.1	protein TSS isoform X1 [Ipomoea triloba]	sp|F4JKH6|TSS_ARATH	Protein TSS OS=Arabidopsis thaliana OX=3702 GN=TSS PE=1 SV=1	PF13424.7;PF12807.8;PF13374.7;PF07719.18;PF15044.7;PF07145.16	TPR_12;eIF3_p135;TPR_10;TPR_2;CLU_N;PAM2	Tetratricopeptide repeat;Translation initiation factor eIF3 subunit 135;Tetratricopeptide repeat;Tetratricopeptide repeat;Mitochondrial function, CLU-N-term;Ataxin-2 C-terminal region
g42978	1.92066e-75	1.09998	0.452	0.201	3.67537e-71	GO:0016117;GO:0016705	biological_process;molecular_function	BP:carotenoid biosynthetic process;MF:oxidoreductase activity, acting on paired donors, with incorporation or reduction of molecular oxygen	K06443	lcyB, crtL1, crtY	map00906	Carotenoid biosynthesis	ENOG410XPIY	I:Lipid transport and metabolism	BAW34177.1	lycopene beta cyclase [Ipomoea batatas]	sp|Q43503|LCYB_SOLLC	Lycopene beta cyclase, chloroplastic OS=Solanum lycopersicum OX=4081 GN=LCY1 PE=1 SV=1	PF05834.13	Lycopene_cycl	Lycopene cyclase protein
g38300	1.79281e-99	1.0997	0.553	0.25	3.43073e-95	GO:0004176;GO:0004252;GO:0009941;GO:0051117;GO:0000302;GO:0009570;GO:0006515;GO:0009368;GO:0010468	molecular_function;molecular_function;cellular_component;molecular_function;biological_process;cellular_component;biological_process;cellular_component;biological_process	MF:ATP-dependent peptidase activity;MF:serine-type endopeptidase activity;CC:chloroplast envelope;MF:ATPase binding;BP:response to reactive oxygen species;CC:chloroplast stroma;BP:misfolded or incompletely synthesized protein catabolic process;CC:endopeptidase Clp complex;BP:regulation of gene expression	K01358	clpP, CLPP			COG0740	S:Function unknown	XP_031123764.1	ATP-dependent Clp protease proteolytic subunit-related protein 4, chloroplastic [Ipomoea triloba]	sp|Q8LB10|CLPR4_ARATH	ATP-dependent Clp protease proteolytic subunit-related protein 4, chloroplastic OS=Arabidopsis thaliana OX=3702 GN=CLPR4 PE=1 SV=1	PF00574.24	CLP_protease	Clp protease
g860	2.26109e-75	1.09921	0.494	0.236	4.32682e-71	GO:0003735;GO:0005840;GO:0006412;GO:0019843	molecular_function;cellular_component;biological_process;molecular_function	MF:structural constituent of ribosome;CC:ribosome;BP:translation;MF:rRNA binding	K02940	RP-L9e, RPL9	map03010	Ribosome	COG0097	J:Translation, ribosomal structure and biogenesis	XP_011470663.1	PREDICTED: probable L-type lectin-domain containing receptor kinase S.7 [Fragaria vesca subsp. vesca]	sp|P30707|RL9_PEA	60S ribosomal protein L9 OS=Pisum sativum OX=3888 GN=RPL9 PE=2 SV=1	PF00139.20;PF00347.24	Lectin_legB;Ribosomal_L6	Legume lectin domain;Ribosomal protein L6
g23055	7.55002e-98	1.09856	0.553	0.247	1.44477e-93	GO:0005737;GO:0009941;GO:0009570;GO:0005634;GO:0042254;GO:0004386;GO:0009658;GO:0003724;GO:0008270;GO:0000373;GO:0009651;GO:0003729;GO:0005524;GO:0003723	cellular_component;cellular_component;cellular_component;cellular_component;biological_process;molecular_function;biological_process;molecular_function;molecular_function;biological_process;biological_process;molecular_function;molecular_function;molecular_function	CC:cytoplasm;CC:chloroplast envelope;CC:chloroplast stroma;CC:nucleus;BP:ribosome biogenesis;MF:helicase activity;BP:chloroplast organization;MF:RNA helicase activity;MF:zinc ion binding;BP:Group II intron splicing;BP:response to salt stress;MF:mRNA binding;MF:ATP binding;MF:RNA binding	K16911	DDX21			COG0513	L:Replication, recombination and repair	XP_031102875.1	DEAD-box ATP-dependent RNA helicase 3, chloroplastic [Ipomoea triloba]	sp|Q8L7S8|RH3_ARATH	DEAD-box ATP-dependent RNA helicase 3, chloroplastic OS=Arabidopsis thaliana OX=3702 GN=RH3 PE=1 SV=2	PF00270.30;PF00271.32;PF08152.13;PF04851.16;PF00098.24;PF13604.7;PF14617.7	DEAD;Helicase_C;GUCT;ResIII;zf-CCHC;AAA_30;CMS1	DEAD/DEAH box helicase;Helicase conserved C-terminal domain;GUCT (NUC152) domain;Type III restriction enzyme, res subunit;Zinc knuckle;AAA domain;U3-containing 90S pre-ribosomal complex subunit
g50608	2.61855e-177	1.09812	0.867	0.497	5.01087e-173	GO:0045041;GO:0005829;GO:0006458;GO:0051082;GO:0042026;GO:0005524	biological_process;cellular_component;biological_process;molecular_function;biological_process;molecular_function	BP:protein import into mitochondrial intermembrane space;CC:cytosol;BP:'de novo' protein folding;MF:unfolded protein binding;BP:protein refolding;MF:ATP binding	K04077	groEL, HSPD1	map03018	RNA degradation	COG0459	S:Function unknown	TEY19523.1	chaperonin GroEL [Salvia splendens]	sp|Q9LJE4|CPNB2_ARATH	Chaperonin 60 subunit beta 2, chloroplastic OS=Arabidopsis thaliana OX=3702 GN=CPN60B2 PE=1 SV=1	PF00118.25;PF13855.7;PF12799.8;PF08263.13	Cpn60_TCP1;LRR_8;LRR_4;LRRNT_2	TCP-1/cpn60 chaperonin family;Leucine rich repeat;Leucine Rich repeats (2 copies;Leucine rich repeat N-terminal domain
g4294	1.06611e-150	1.09681	0.771	0.391	2.0401e-146	GO:0031072;GO:0051082;GO:0005524;GO:0004672	molecular_function;molecular_function;molecular_function;molecular_function	MF:heat shock protein binding;MF:unfolded protein binding;MF:ATP binding;MF:protein kinase activity					ENOG410XPGP	L:Replication, recombination and repair	XP_031112528.1	casein kinase 1-like protein HD16 [Ipomoea triloba]	sp|Q852L0|HD16N_ORYSJ	Casein kinase 1-like protein HD16 OS=Oryza sativa subsp. japonica OX=39947 GN=HD16 PE=1 SV=1	PF00069.26;PF17667.2;PF07714.18;PF00684.20	Pkinase;Pkinase_fungal;PK_Tyr_Ser-Thr;DnaJ_CXXCXGXG	Protein kinase domain;Fungal protein kinase;Protein tyrosine and serine/threonine kinase;DnaJ central domain
g9529	1.0516e-67	1.09671	0.419	0.183	2.01234e-63	GO:0031359	cellular_component	CC:integral component of chloroplast outer membrane					ENOG410Z8W9	S:Function unknown	XP_019197451.1	PREDICTED: outer envelope membrane protein 7-like [Ipomoea nil]	sp|Q9SVC4|OEP7_ARATH	Outer envelope membrane protein 7 OS=Arabidopsis thaliana OX=3702 GN=OEP7 PE=1 SV=1
g54751	1.06908e-76	1.09629	0.485	0.223	2.0458e-72	GO:0022857;GO:0010167;GO:0015112;GO:0016021	molecular_function;biological_process;molecular_function;cellular_component	MF:transmembrane transporter activity;BP:response to nitrate;MF:nitrate transmembrane transporter activity;CC:integral component of membrane					COG3104	S:Function unknown	XP_031105253.1	protein NRT1/ PTR FAMILY 6.4 [Ipomoea triloba]	sp|Q9LVE0|PTR33_ARATH	Protein NRT1/ PTR FAMILY 6.4 OS=Arabidopsis thaliana OX=3702 GN=NPF6.4 PE=1 SV=1	PF00854.22;PF07690.17	PTR2;MFS_1	POT family;Major Facilitator Superfamily
[truncated: 1,744 more rows]
