# Supplementary material for: Cell-type-specific response in host plants to the co-infection by sweet potato viruses
Source: Research Square preprint supplement (doi:10.21203/rs.3.rs-5025036/v1), 2024-09-20
Supplement: Supplementary file 13 [file Table_S6.xlsx]

## Sheet: Sheet1
qRT-PCR primers
		Forward (5'-3')	Reverse (5'-3')
VIPE1	g30803	CGTCGTCGAAGAGAACAACT	GGGTGGAGCAAGGTTAAGAT
LHC1	g37393	CTGCTACAATGGCTCTCTCTTC	GCTCCCTTCCTCATGGTAAAC
LHC2	g34739	GCTTCCACAATGGCTCTTTC	GGCCTTCCTCATGGTAAACT
LHC3	g280	GGGTCAGACCAAGAATGCTAAT	TCAGGCCCATACCACAAATC
LHC4	g58875	GGATCATCGTATCTGGGACAAC	TCCGCGTTTCTTTGGAACT
LHC5	g50581	CTGTGTGCTCTTCGTGAGTT	CTTCCACAGCAAACCCTTCT
	IbUBI	TCGACAATGTGAAGGCAAAG	CTTGATCTTCTTCGGCTTGG
	SPFMV	GACTGATATGAGTCTTGCGCGRTATGCG	TGTGCCTCTCCGTATCYTCTTCTTGCGT
	SPLCV	GTAAGCGTGTTTGTGTGAAGT	TCCATTCGGATCTTAGCAGTAGT
	Ib-Actin	CTGGTGTTATGGTTGGGATGG	GGGGTGCCTCGGTAAGAAG
RNA in situ Hybid
Probes	g57924		CTCCTCCAACTGTCTCAACCTGCCAACATT
	g17163		ACATAGCCTGCAGCTGTTTGAGGCATCTCA
	g29056		GAGCTTCTGATCAGTGTCGCCGTAGGGCGA
	g14823		GAACGACGACCACAGUCAUGACAGCCCAAA
